# Supplementary material for: A mild one-pot transformation of nitroalkanes to ketones or aldehydes via a visible-light photocatalysis–hydrolysis sequence
Source: Royal Society of Chemistry journal article supplement (doi:10.1039/d2ob00267a), 2022-01-01
Supplement: d2ob00267a1.pdf [file d2ob00267a1.pdf]

## Supporting Information

# A Mild and One-pot Transformation of Nitroalkanes to Ketones or Aldehydes via a Visible-Light Photocatalysis–Hydrolysis Sequence

Yin-Yin, Hsu,<sup>a</sup> Sheng-Qi Luo,<sup>a</sup> Bor-Cherng Hong,<sup>\*a</sup> and Su-Ying Chien<sup>b</sup>

<sup>a</sup> Department of Chemistry and Biochemistry, National Chung Cheng University, Chiayi, 621, Taiwan.

<sup>b</sup> Instrumentation Center, National Taiwan University, Taipei, 106, Taiwan.

### SUPPORTING INFORMATION:

Contents:

- |                                |              |
|--------------------------------|--------------|
| (1) X-ray crystal data.....    | Page S2–S3   |
| (2) Spectra for compounds..... | Page S4–S176 |

### Procedure for recrystallization of 2j

Compound **2j** (~5 mg) in a screw-capped vial (4 mL vial) was dissolved in EtOAc (0.5 mL). The vial was placed in another vial (20 mL vial) filled with n-hexane (10 mL). The 20 mL vial was closed gently with a screw cap and stands it for a few days until the formation of the crystals. The crystals formed were subjected to single-crystal X-ray analysis.

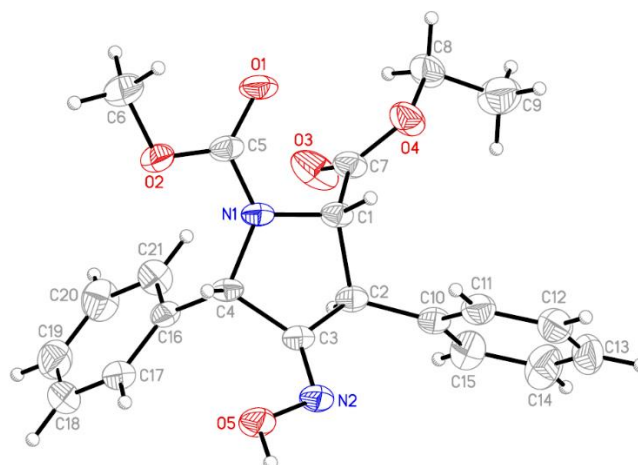

Thermal ellipsoids draw at the 50% probability level

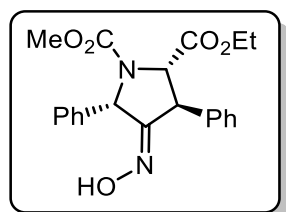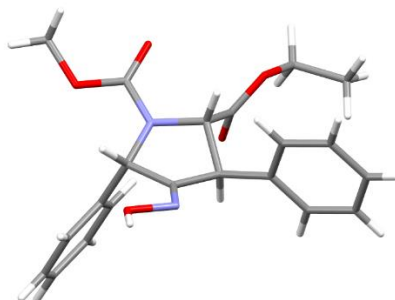

**Figure S1.** ORTEP and Stereo plots for X-ray crystal structures of **2j** (ic21150).

CCDC 2125600 contains the supplementary crystallographic data for **2j** (ic21150). These data can be obtained free of charge from the Cambridge Crystallographic Data Centre via [www.ccdc.cam.ac.uk](http://www.ccdc.cam.ac.uk)

Table S1. Crystal data and structure refinement for **2j** (ic21150).

|                                   |                                                               |                    |
|-----------------------------------|---------------------------------------------------------------|--------------------|
| Identification code               | ic21150                                                       |                    |
| Empirical formula                 | C <sub>21</sub> H <sub>22</sub> N <sub>2</sub> O <sub>5</sub> |                    |
| Formula weight                    | 382.40                                                        |                    |
| Temperature                       | 200(2) K                                                      |                    |
| Wavelength                        | 0.71073 Å                                                     |                    |
| Crystal system                    | Monoclinic                                                    |                    |
| Space group                       | P2 <sub>1</sub> /c                                            |                    |
| Unit cell dimensions              | a = 5.73510(10) Å                                             | α = 90°.           |
|                                   | b = 41.9722(12) Å                                             | β = 107.6440(10)°. |
|                                   | c = 8.3858(2) Å                                               | γ = 90°.           |
| Volume                            | 1923.63(8) Å <sup>3</sup>                                     |                    |
| Z                                 | 4                                                             |                    |
| Density (calculated)              | 1.320 Mg/m <sup>3</sup>                                       |                    |
| Absorption coefficient            | 0.095 mm <sup>-1</sup>                                        |                    |
| F(000)                            | 808                                                           |                    |
| Crystal size                      | 0.461 x 0.190 x 0.093 mm <sup>3</sup>                         |                    |
| Theta range for data collection   | 2.595 to 27.498°.                                             |                    |
| Index ranges                      | -6 ≤ h ≤ 7, -54 ≤ k ≤ 54, -10 ≤ l ≤ 10                        |                    |
| Reflections collected             | 22898                                                         |                    |
| Independent reflections           | 4406 [R(int) = 0.0358]                                        |                    |
| Completeness to theta = 25.242°   | 99.9 %                                                        |                    |
| Absorption correction             | Semi-empirical from equivalents                               |                    |
| Max. and min. transmission        | 0.9595 and 0.8936                                             |                    |
| Refinement method                 | Full-matrix least-squares on F <sup>2</sup>                   |                    |
| Data / restraints / parameters    | 4406 / 0 / 256                                                |                    |
| Goodness-of-fit on F <sup>2</sup> | 1.070                                                         |                    |
| Final R indices [I > 2σ(I)]       | R1 = 0.0502, wR2 = 0.1197                                     |                    |
| R indices (all data)              | R1 = 0.0602, wR2 = 0.1250                                     |                    |
| Extinction coefficient            | n/a                                                           |                    |
| Largest diff. peak and hole       | 0.313 and -0.209 e.Å <sup>-3</sup>                            |                    |

1H NMR (CDCl3, 400 MHz) of compound **2a** (E/Z isomers)

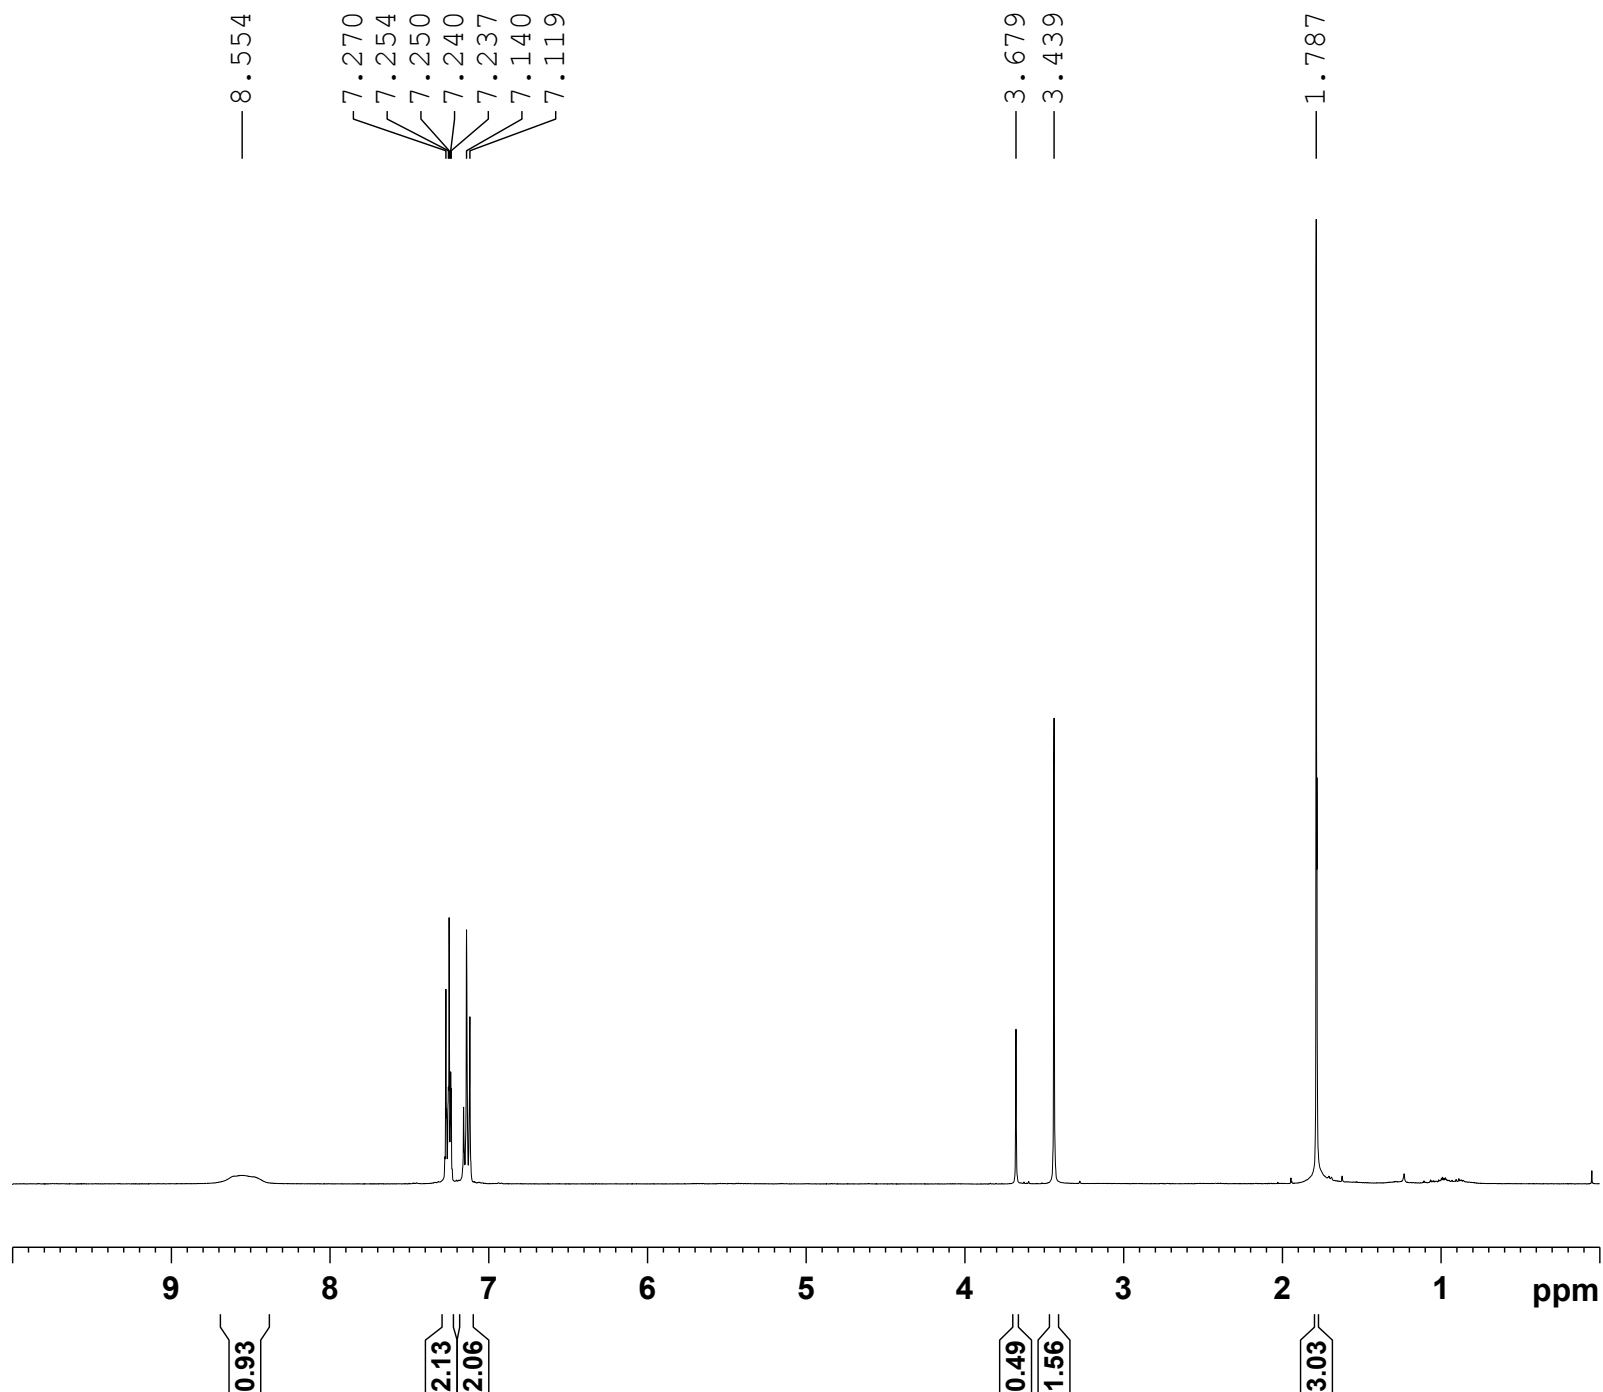

Current Data Parameters  
 NAME YYH-041  
 EXPNO 1  
 PROCNO 1

F2 - Acquisition Parameters  
 Date\_ 20210128  
 Time\_ 23.04 h  
 INSTRUM spect  
 PROBHD z108618\_0922 (  
 PULPROG zg30  
 TD 32768  
 SOLVENT CDCl3  
 NS 16  
 DS 0  
 SWH 8012.820 Hz  
 FIDRES 0.489064 Hz  
 AQ 2.0447233 sec  
 RG 177.78  
 DW 62.400 usec  
 DE 16.43 usec  
 TE 295.0 K  
 D1 2.00000000 sec  
 TD0 1  
 SFO1 400.1324008 MHz  
 NUC1 1H  
 P1 14.50 usec  
 PLW1 12.69999981 W

F2 - Processing parameters  
 SI 16384  
 SF 400.1300176 MHz  
 WDW EM  
 SSB 0  
 LB 0 Hz  
 GB 0  
 PC 1.00



13C NMR (CDCl3, 100 MHz) of compound **2a** (E/Z isomers)

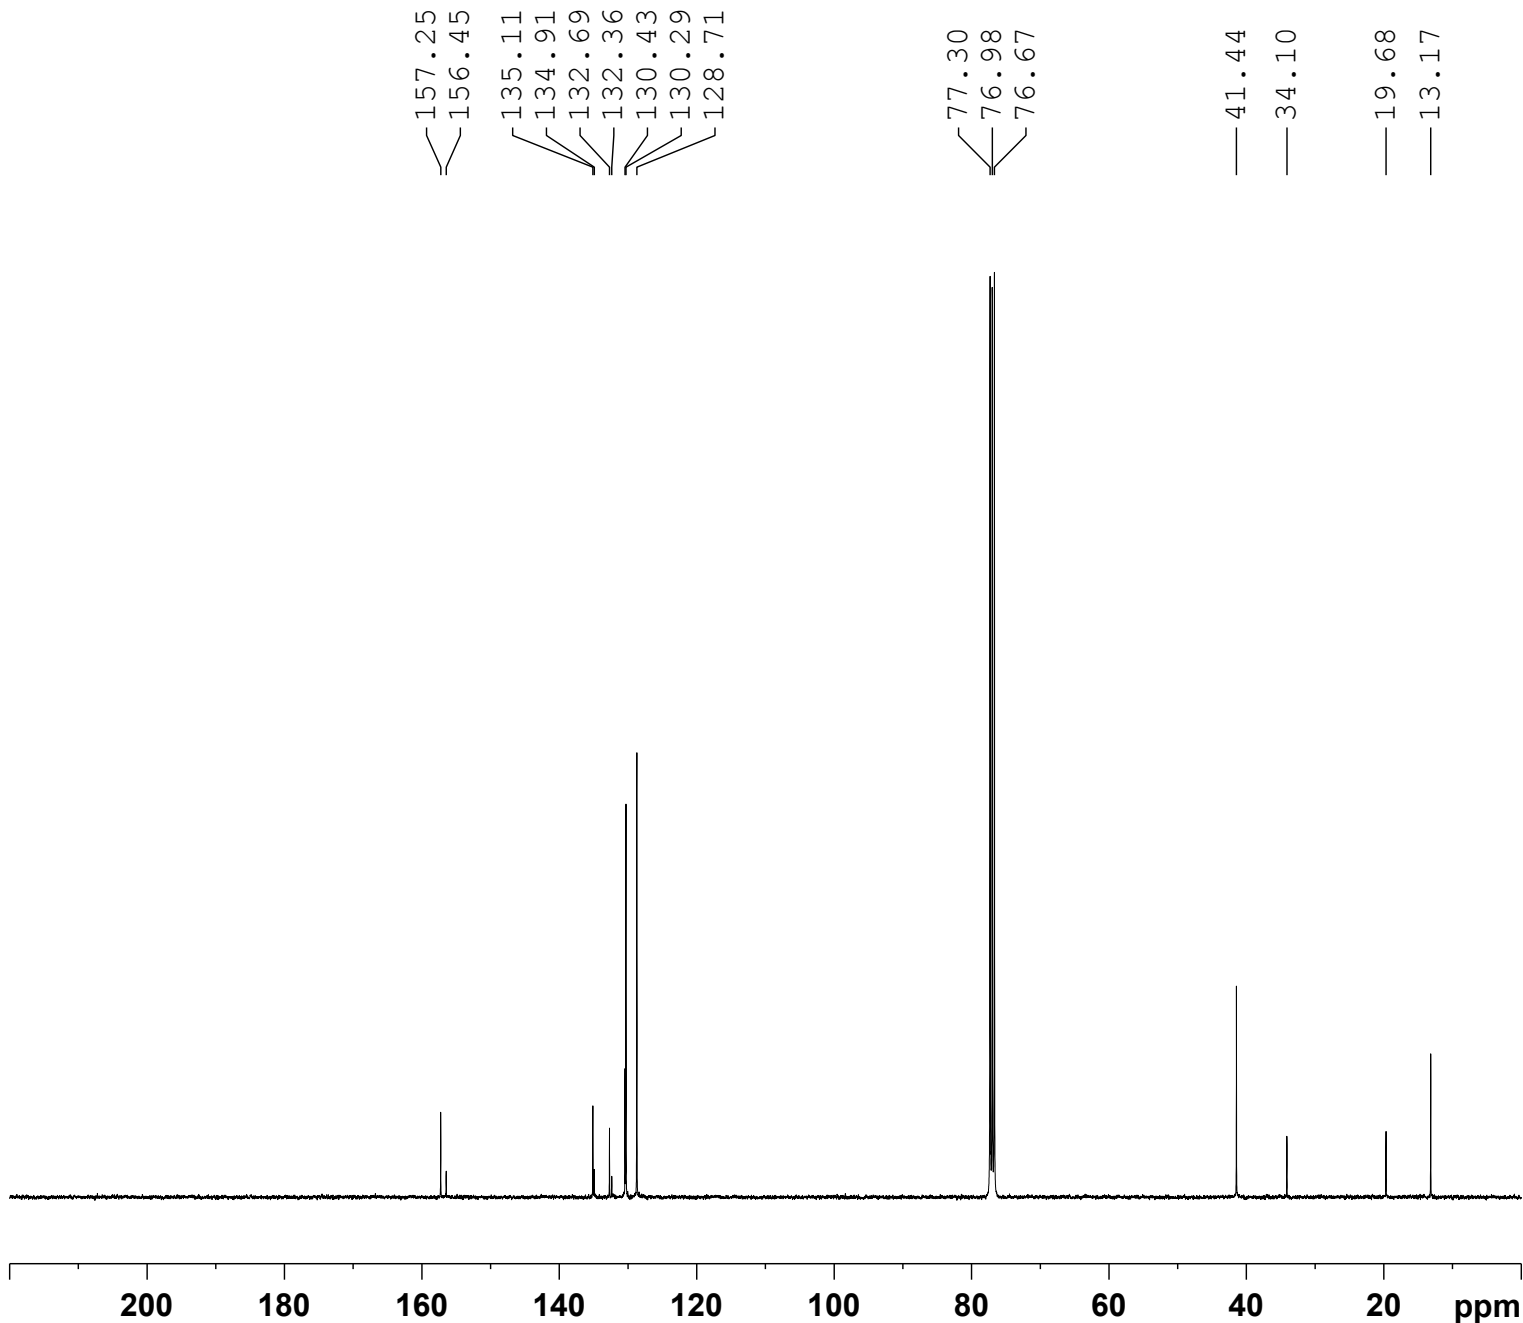

Current Data Parameters  
 NAME YYH-041  
 EXPNO 2  
 PROCNO 1

F2 - Acquisition Parameters  
 Date\_ 20210129  
 Time\_ 2.12 h  
 INSTRUM spect  
 PROBHD z108618\_0922 (  
 PULPROG zgpg30  
 TD 32768  
 SOLVENT CDCl3  
 NS 4096  
 DS 0  
 SWH 24038.461 Hz  
 FIDRES 1.467191 Hz  
 AQ 0.6815744 sec  
 RG 210.28  
 DW 20.800 usec  
 DE 6.50 usec  
 TE 296.1 K  
 D1 2.00000000 sec  
 D11 0.03000000 sec  
 TD0 1  
 SFO1 100.6233329 MHz  
 NUC1 13C  
 P1 10.50 usec  
 PLW1 44.09999847 W  
 SFO2 400.1316005 MHz  
 NUC2 1H  
 CPDPRG[2 bi\_waltz65 256  
 PCPD2 90.00 usec  
 PLW2 14.30000019 W  
 PLW12 0.37118000 W  
 PLW13 0.18640999 W

F2 - Processing parameters  
 SI 32768  
 SF 100.6127732 MHz  
 WDW EM  
 SSB 0  
 LB 2.00 Hz  
 GB 0  
 PC 1.00

DEPT of compound **2a** (E/Z isomers)

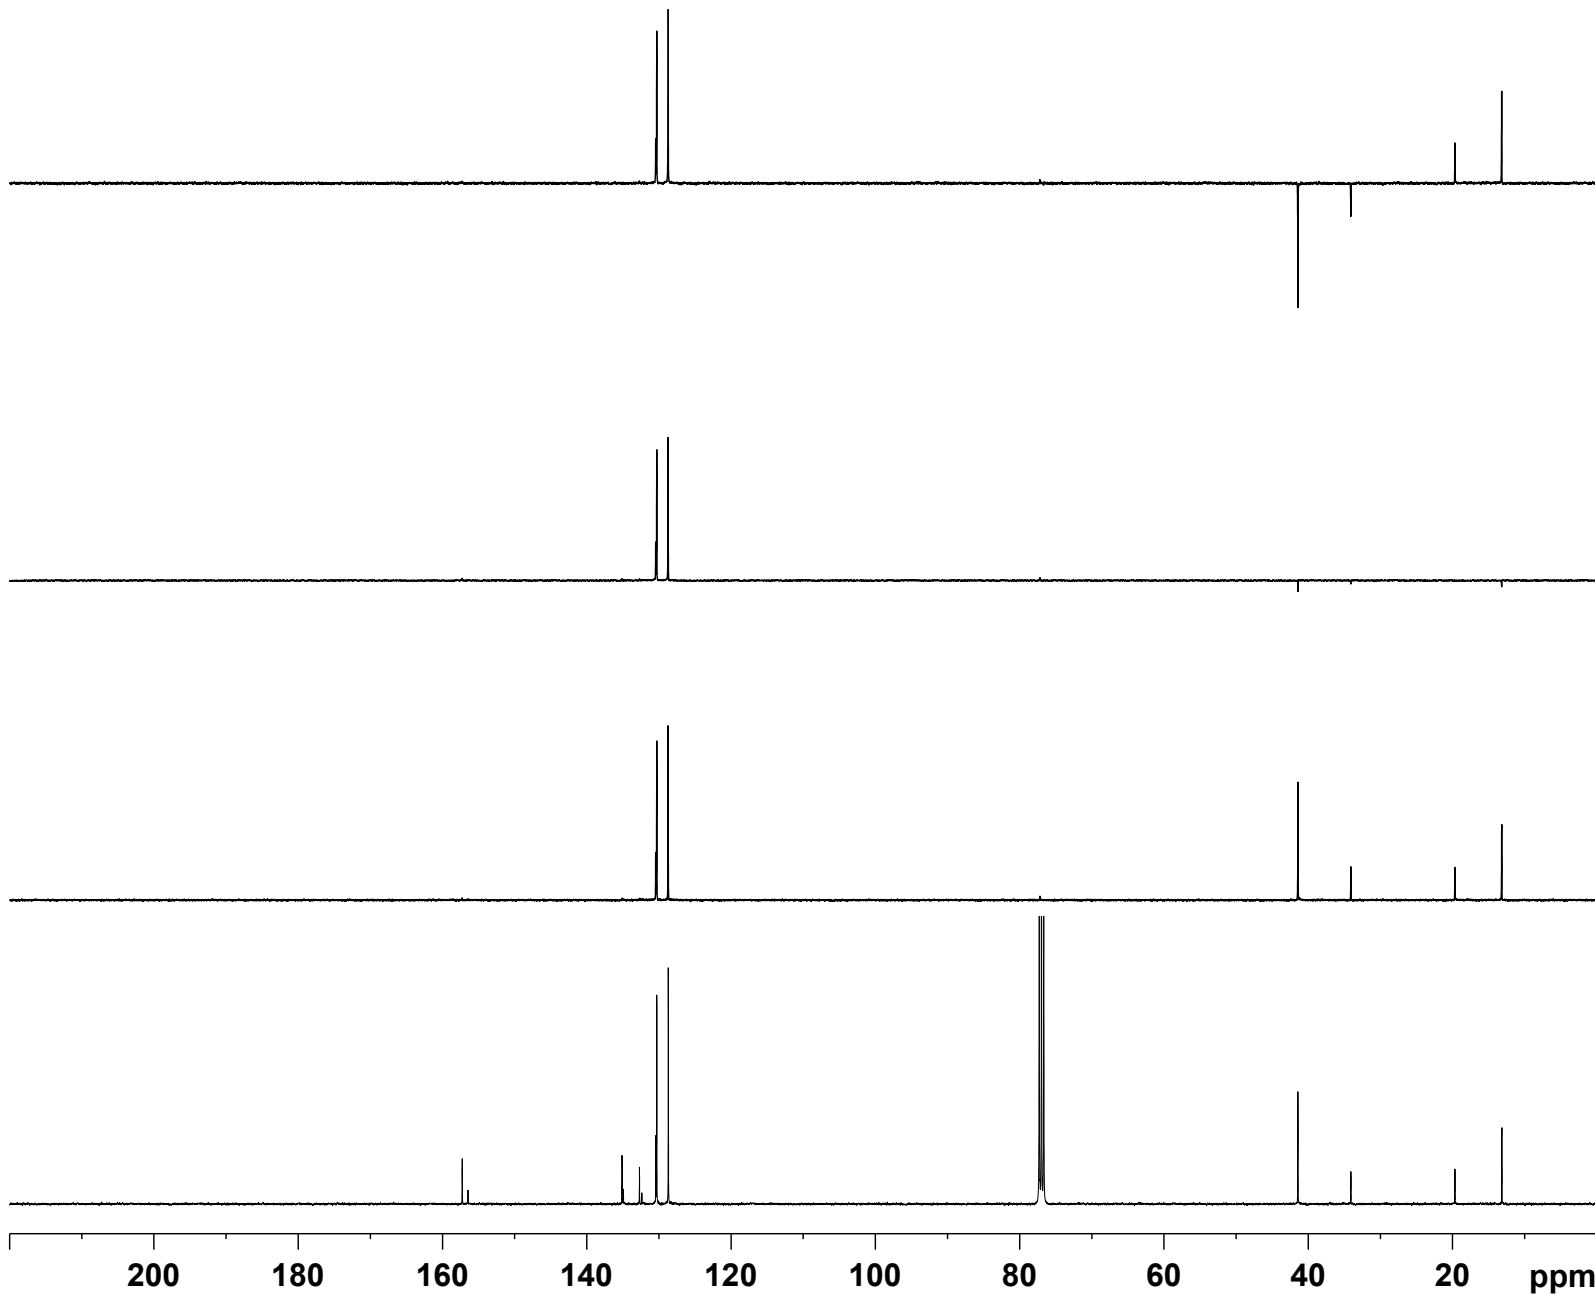

```

Current Data Parameters
NAME                YYH-041
EXPNO                2
PROCNO              1

F2 - Acquisition Parameters
Date_                20210129
Time                 2.12 h
INSTRUM              spect
PROBHD               Z108618_0922 (
PULPROG              zgpg30
TD                   32768
SOLVENT              CDC13
NS                   4096
DS                   0
SWH                  24038.461 Hz
FIDRES               1.467191 Hz
AQ                   0.6815744 sec
RG                   210.28
DW                   20.800 usec
DE                   6.50 usec
TE                   296.1 K
D1                   2.00000000 sec
D11                  0.03000000 sec
TD0                  1
SFO1                 100.6233329 MHz
NUC1                 13C
P1                   10.50 usec
PLW1                 44.09999847 W
SFO2                 400.1316005 MHz
NUC2                 1H
CPDPRG[2]            bi_waltz65_256
PCPD2                90.00 usec
PLW2                 14.30000019 W
PLW12                0.37118000 W
PLW13                0.18640999 W

F2 - Processing parameters
SI                   32768
SF                   100.6127732 MHz
WDW                  EM
SSB                  0
LB                   2.00 Hz
GB                   0
PC                   1.00
    
```

HSQC of compound **2a** (E/Z isomers)

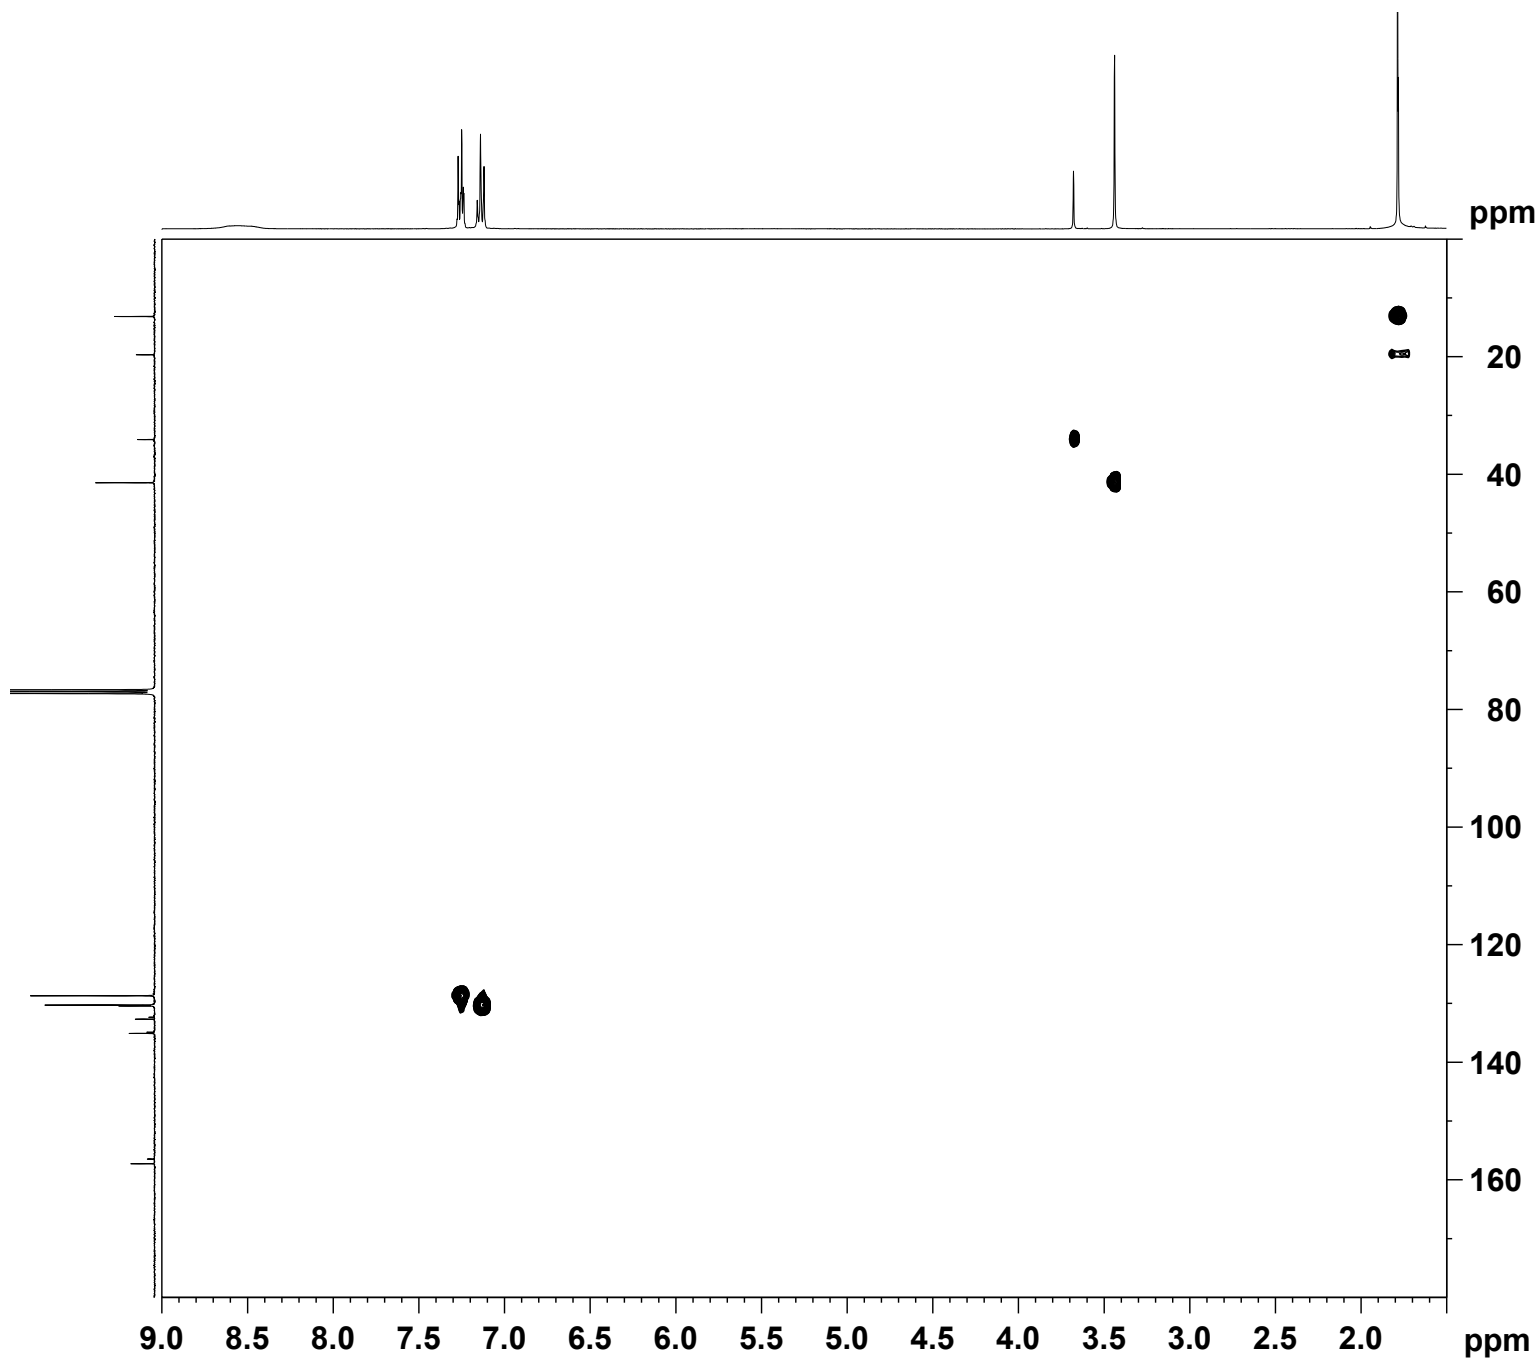

```

Current Data Parameters
NAME      YYH-041
EXPNO    6
PROCNO   1

F2 - Acquisition Parameters
Date_    20210129
Time     6.53 h
INSTRUM  spect
PROBHD   Z108618_0922 (
PULPROG  hsqcetgpsisp2.2
TD       2048
SOLVENT  CDCl3
NS       4
DS       16
SWH      8012.820 Hz
FIDRES   7.825020 Hz
AQ       0.1277952 sec
RG       210.28
DW       62.400 usec
DE       6.50 usec
TE       294.7 K
CNST2    145.0000000
CNST17   -0.5000000
D0       0.00000300 sec
D1       1.50000000 sec
D4       0.00172414 sec
D11      0.03000000 sec
D16      0.00020000 sec
D24      0.00086207 sec
IN0      0.00002080 sec
TDav     1
SFO1     400.1324008 MHz
NUC1     1H
P1       14.50 usec
P2       29.00 usec
P28      1000.00 usec
PLW1     12.69999981 W
SFO2     100.6233329 MHz
NUC2     13C
CPDPRG[2] garp
P3       10.50 usec
P14      500.00 usec
P24      2000.00 usec
PCPD2    80.00 usec
PLW0     0 W
PLW2     44.00000000 W
PLW12    0.75796998 W
SPNAM[3] Crp60,0.5,20.1
SFOAL3   0.500
SPOFFS3  0 Hz
SPW3     7.41179991 W
SPNAM[7] Crp60comp.4
SFOAL7   0.500
SPOFFS7  0 Hz
SPW7     7.41179991 W
GPNAM[1] SMSQ10.100
GPZ1     80.00 %
GPNAM[2] SMSQ10.100
GPZ2     20.10 %
GPNAM[3] SMSQ10.100
GPZ3     11.00 %
GPNAM[4] SMSQ10.100
GPZ4     -5.00 %
P16      1000.00 usec
P19      600.00 usec

F1 - Acquisition parameters
TD       256
SFO1     100.6233 MHz
FIDRES   187.800476 Hz
SW       238.896 ppm
FnMODE   Echo-Antiecho

F2 - Processing parameters
SI       1024
SF       400.1300176 MHz
WDW      QSINE
SSB      2
LB       0 Hz
GB       0
PC       1.40

F1 - Processing parameters
SI       1024
MC2      echo-antiecho
SF       100.6127732 MHz
WDW      QSINE
SSB      2
LB       0 Hz
GB       0
    
```

COSY of compound **2a** (E/Z isomers)

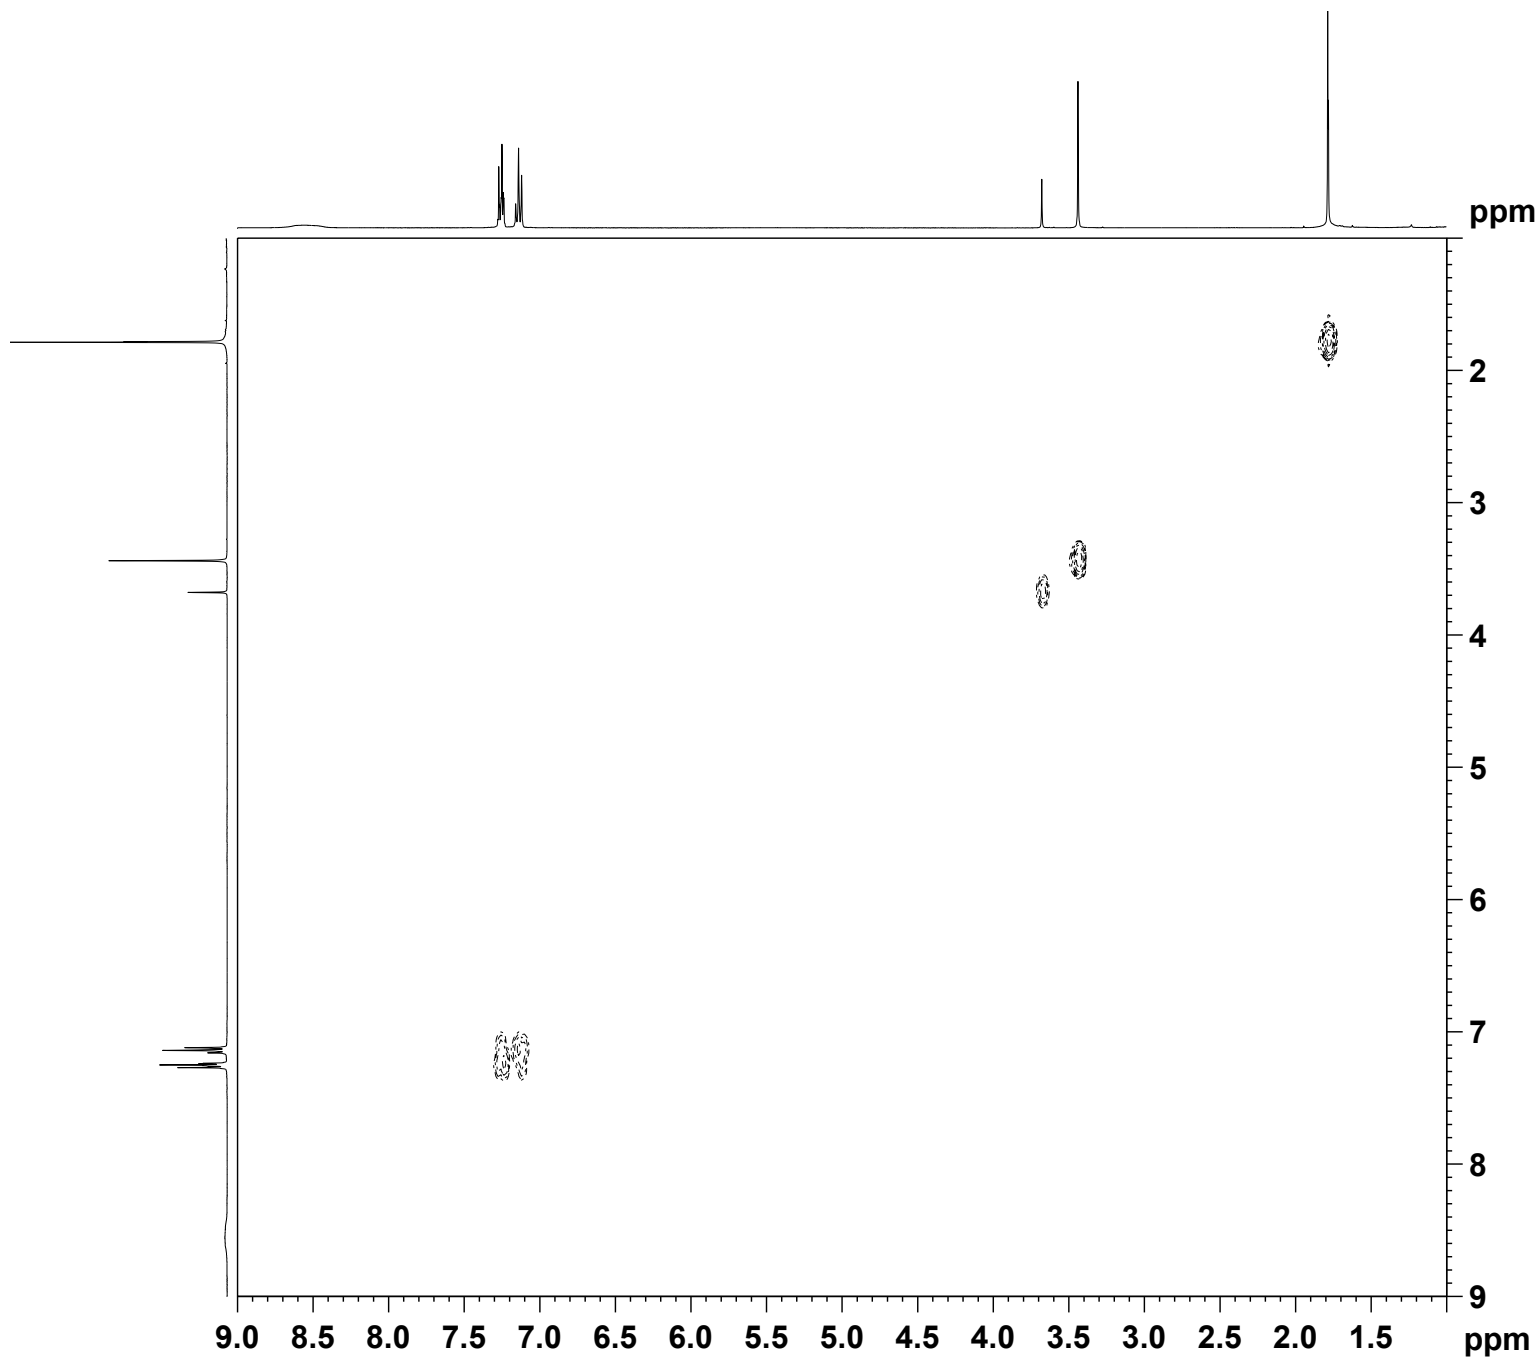

```

Current Data Parameters
NAME          YYH-041
EXPNO         7
PROCNO        1

F2 - Acquisition Parameters
Date_         20210129
Time          7.22 h
INSTRUM       spect
PROBHD        Z108618 0922 (
PULPROG       cosygpppqf
TD            2048
SOLVENT       CDCl3
NS            4
DS            16
SWH           8012.820 Hz
FIDRES        7.825020 Hz
AQ            0.1277952 sec
RG            210.28
DW            62.400 usec
DE            6.50 usec
TE            294.6 K
D0            0.00000300 sec
D1            2.00000000 sec
D11           0.03000000 sec
D12           0.00002000 sec
D13           0.00000400 sec
D16           0.00020000 sec
IN0           0.00012480 sec
TDav          1
SFO1          400.1324008 MHz
NUC1          1H
P0            14.50 usec
P1            14.50 usec
P17           2500.00 usec
PLW1          12.69999981 W
PLW10         2.96690011 W
GPNAM[1]      SMSQ10.100
GPZ1          10.00 %
P16           1000.00 usec

F1 - Acquisition parameters
TD            256
SFO1          400.1324 MHz
FIDRES        62.600159 Hz
SW            20.025 ppm
FnMODE        QF

F2 - Processing parameters
SI            1024
SF            400.1300176 MHz
WDW           QSINE
SSB           0
LB            0 Hz
GB            0
PC            1.40

F1 - Processing parameters
SI            1024
MC2           QF
SF            400.1300176 MHz
WDW           QSINE
SSB           0
LB            0 Hz
GB            0
    
```

NOESY of compound **2a** (E/Z isomers)

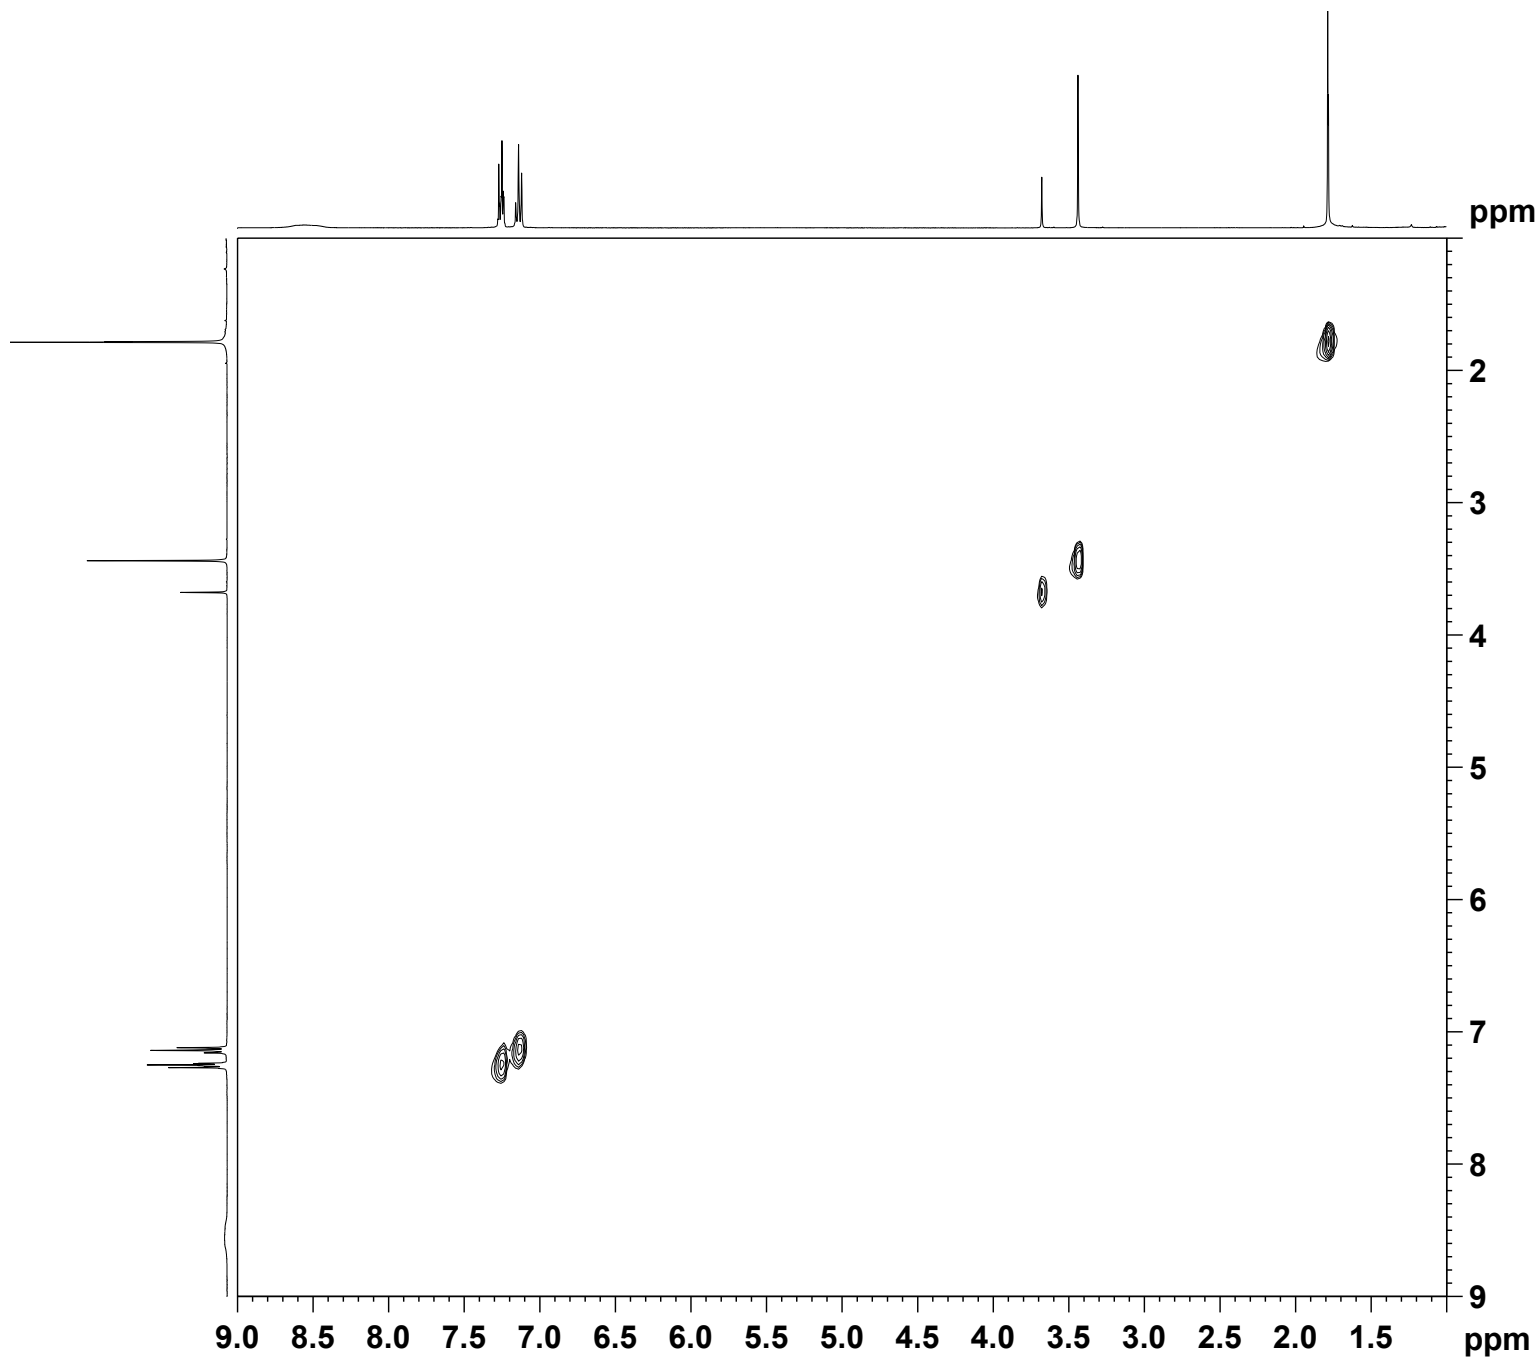

```

Current Data Parameters
NAME          YYH-041
EXPNO        8
PROCNO       1

F2 - Acquisition Parameters
Date_        20210129
Time         8.01 h
INSTRUM     spect
PROBHD      Z108618_0922 (
PULPROG     noesygpphpp
TD          2048
SOLVENT     CDCl3
NS          4
DS          16
SWH         8012.820 Hz
FIDRES      7.825020 Hz
AQ          0.1277952 sec
RG          112.98
DW          62.400 usec
DE          6.50 usec
TE          294.0 K
D0          0.00004394 sec
D1          2.00000000 sec
D8          0.40000001 sec
D11         0.03000000 sec
D12         0.00002000 sec
D16         0.00020000 sec
IN0         0.00012480 sec
TDav        1
SFO1        400.1324008 MHz
NUC1        1H
P1          14.50 usec
P2          29.00 usec
P17         2500.00 usec
PLW1        12.69999981 W
PLW10       2.96690011 W
GPNAM[1]    SMSQ10.100
GPZ1        40.00 %
P16         1000.00 usec

F1 - Acquisition parameters
TD          256
SFO1        400.1324 MHz
FIDRES      62.600159 Hz
SW          20.025 ppm
FnMODE      States-TPPI

F2 - Processing parameters
SI          1024
SF          400.1300176 MHz
WDW         QSINE
SSB         2
LB          0 Hz
GB          0
PC          1.40

F1 - Processing parameters
SI          1024
MC2         States-TPPI
SF          400.1300176 MHz
WDW         QSINE
SSB         2
LB          0 Hz
GB          0
    
```

1H NMR (CDCl3, 400 MHz) of compound **2b** (E/Z isomers)

S10

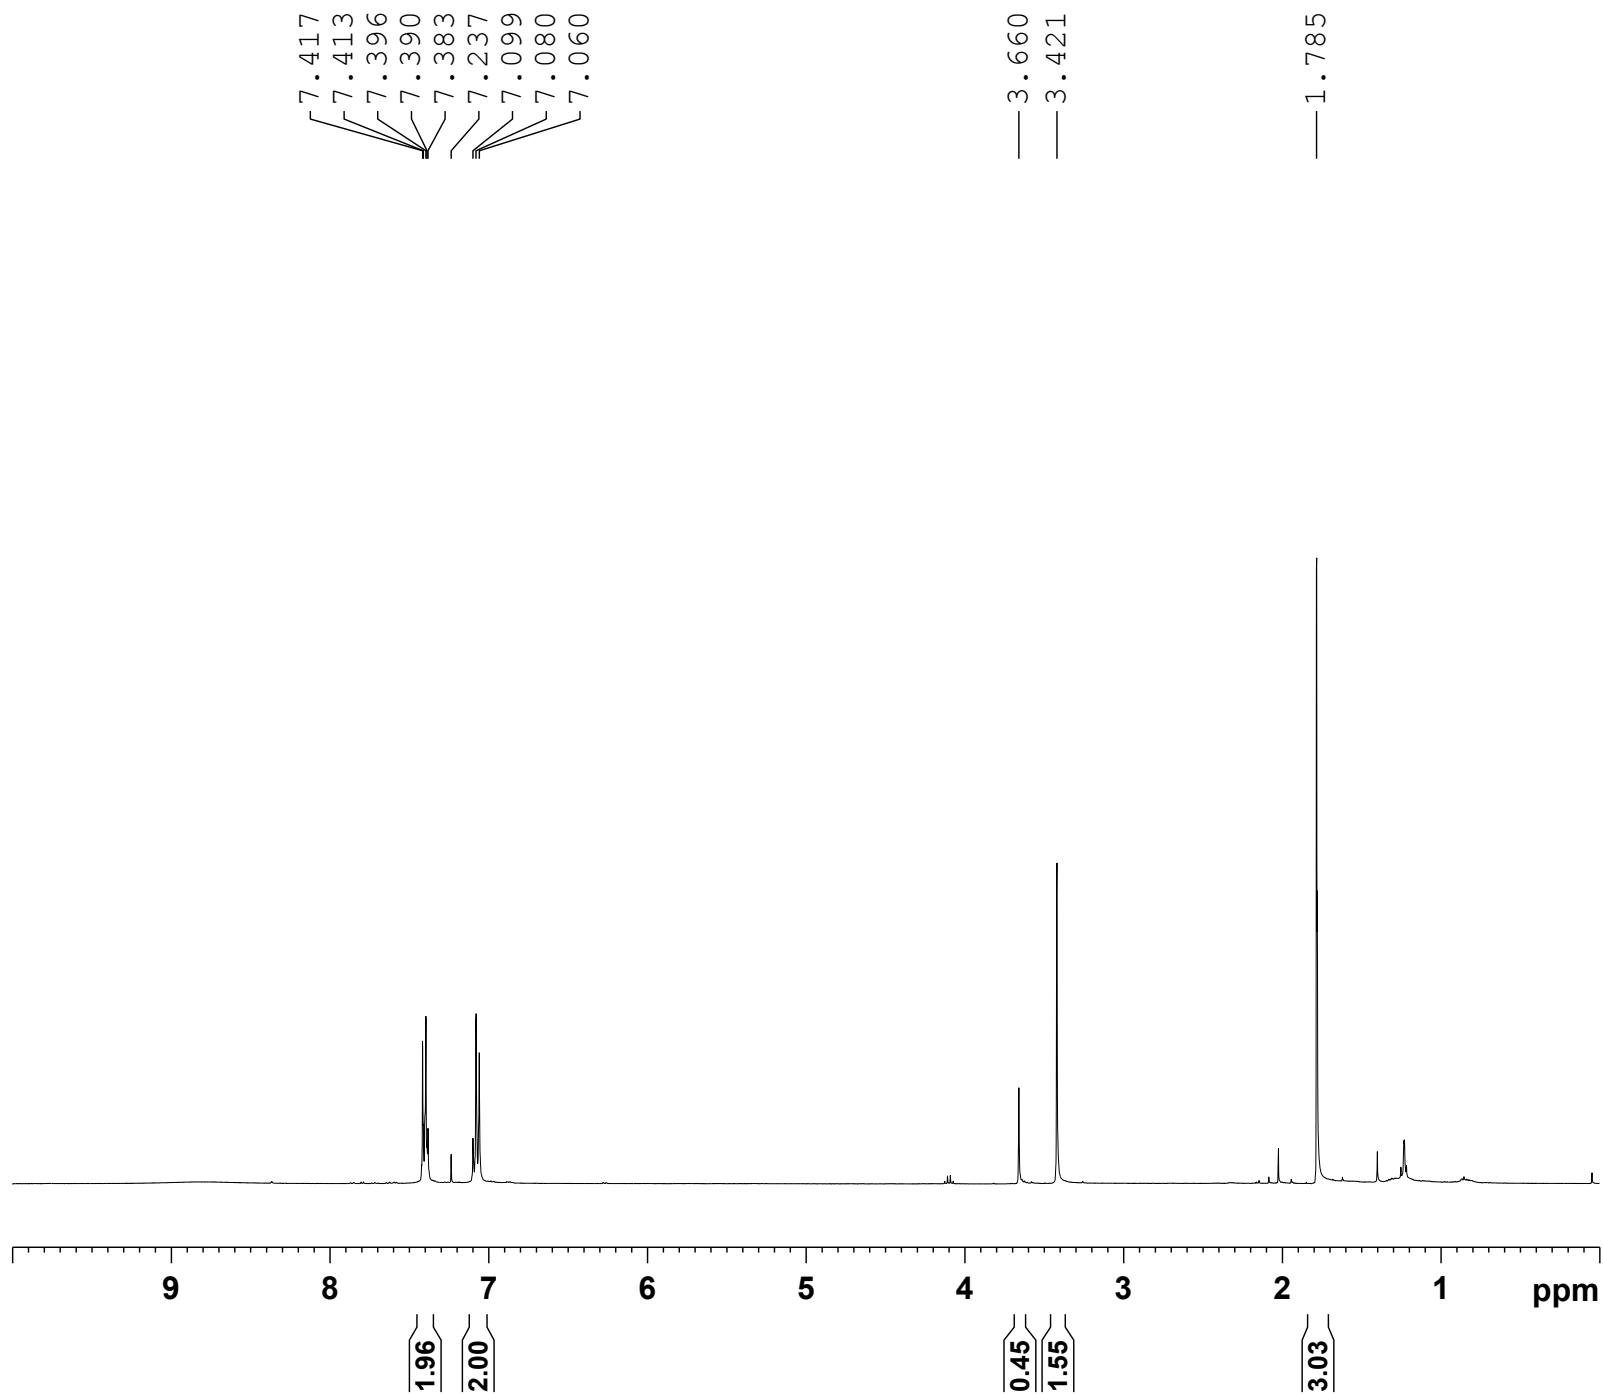

Current Data Parameters  
NAME YYH-066  
EXPNO 1  
PROCNO 1

F2 - Acquisition Parameters  
Date\_ 20210423  
Time\_ 16.57 h  
INSTRUM spect  
PROBHD z108618\_0922 (  
PULPROG zg30  
TD 32768  
SOLVENT CDC13  
NS 15  
DS 0  
SWH 8012.820 Hz  
FIDRES 0.489064 Hz  
AQ 2.0447233 sec  
RG 128.5  
DW 62.400 usec  
DE 16.43 usec  
TE 295.7 K  
D1 2.00000000 sec  
TD0 1  
SFO1 400.1324008 MHz  
NUC1 1H  
P1 14.50 usec  
PLW1 12.69999981 W

F2 - Processing parameters  
SI 16384  
SF 400.1300190 MHz  
WDW EM  
SSB 0  
LB 0 Hz  
GB 0  
PC 1.00

<sup>13</sup>C NMR (CDCl<sub>3</sub>, 100 MHz) of compound **2b** (E/Z isomers)

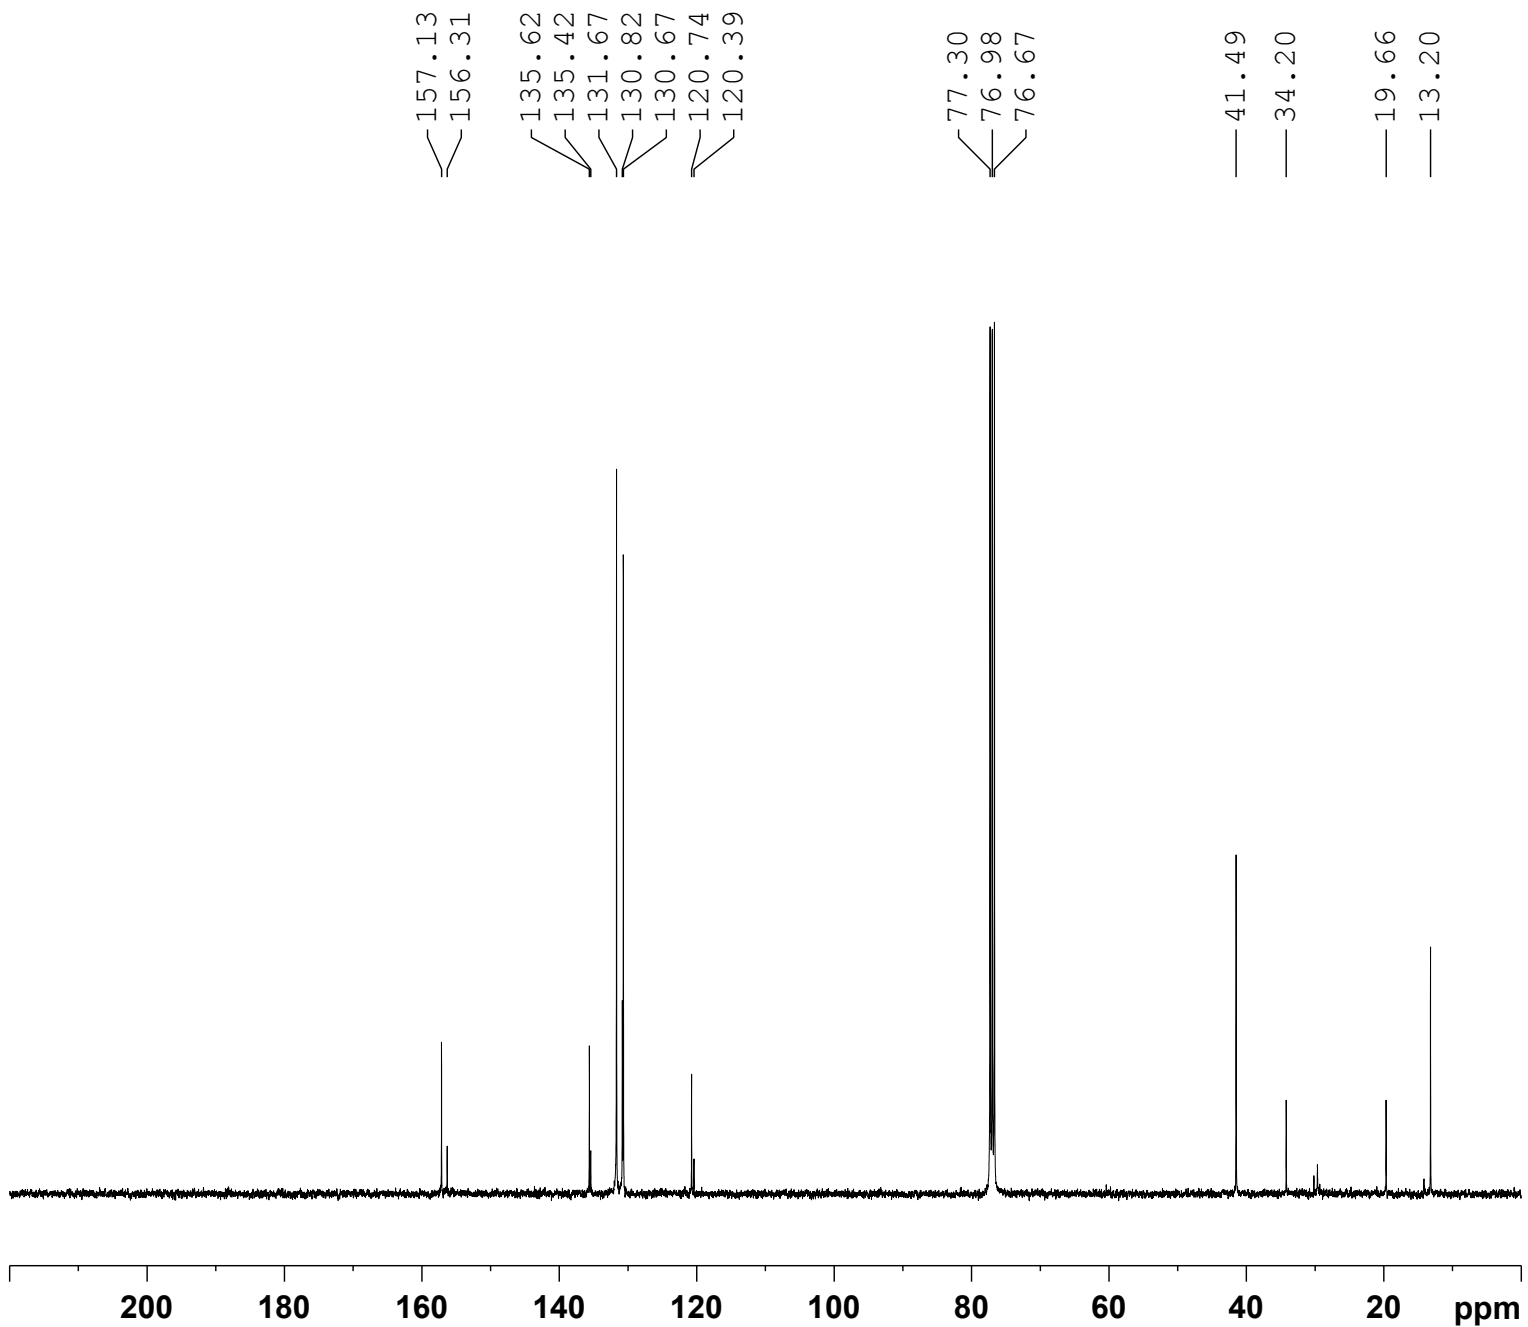

Current Data Parameters  
 NAME YYH-066  
 EXPNO 2  
 PROCNO 1

F2 - Acquisition Parameters  
 Date\_ 20210423  
 Time\_ 18.09 h  
 INSTRUM spect  
 PROBHD z108618\_0922 (  
 PULPROG zgpg30  
 TD 32768  
 SOLVENT CDCl3  
 NS 1500  
 DS 0  
 SWH 24038.461 Hz  
 FIDRES 1.467191 Hz  
 AQ 0.6815744 sec  
 RG 210.28  
 DW 20.800 usec  
 DE 6.50 usec  
 TE 296.6 K  
 D1 2.00000000 sec  
 D11 0.03000000 sec  
 TD0 1  
 SFO1 100.6233329 MHz  
 NUC1 13C  
 P1 10.50 usec  
 PLW1 44.09999847 W  
 SFO2 400.1316005 MHz  
 NUC2 1H  
 CPDPRG[2] bi\_waltz65 256  
 PCPD2 90.00 usec  
 PLW2 14.30000019 W  
 PLW12 0.37118000 W  
 PLW13 0.18640999 W

F2 - Processing parameters  
 SI 32768  
 SF 100.6127739 MHz  
 WDW EM  
 SSB 0  
 LB 2.00 Hz  
 GB 0  
 PC 1.00

DEPT of compound **2b** (E/Z isomers)

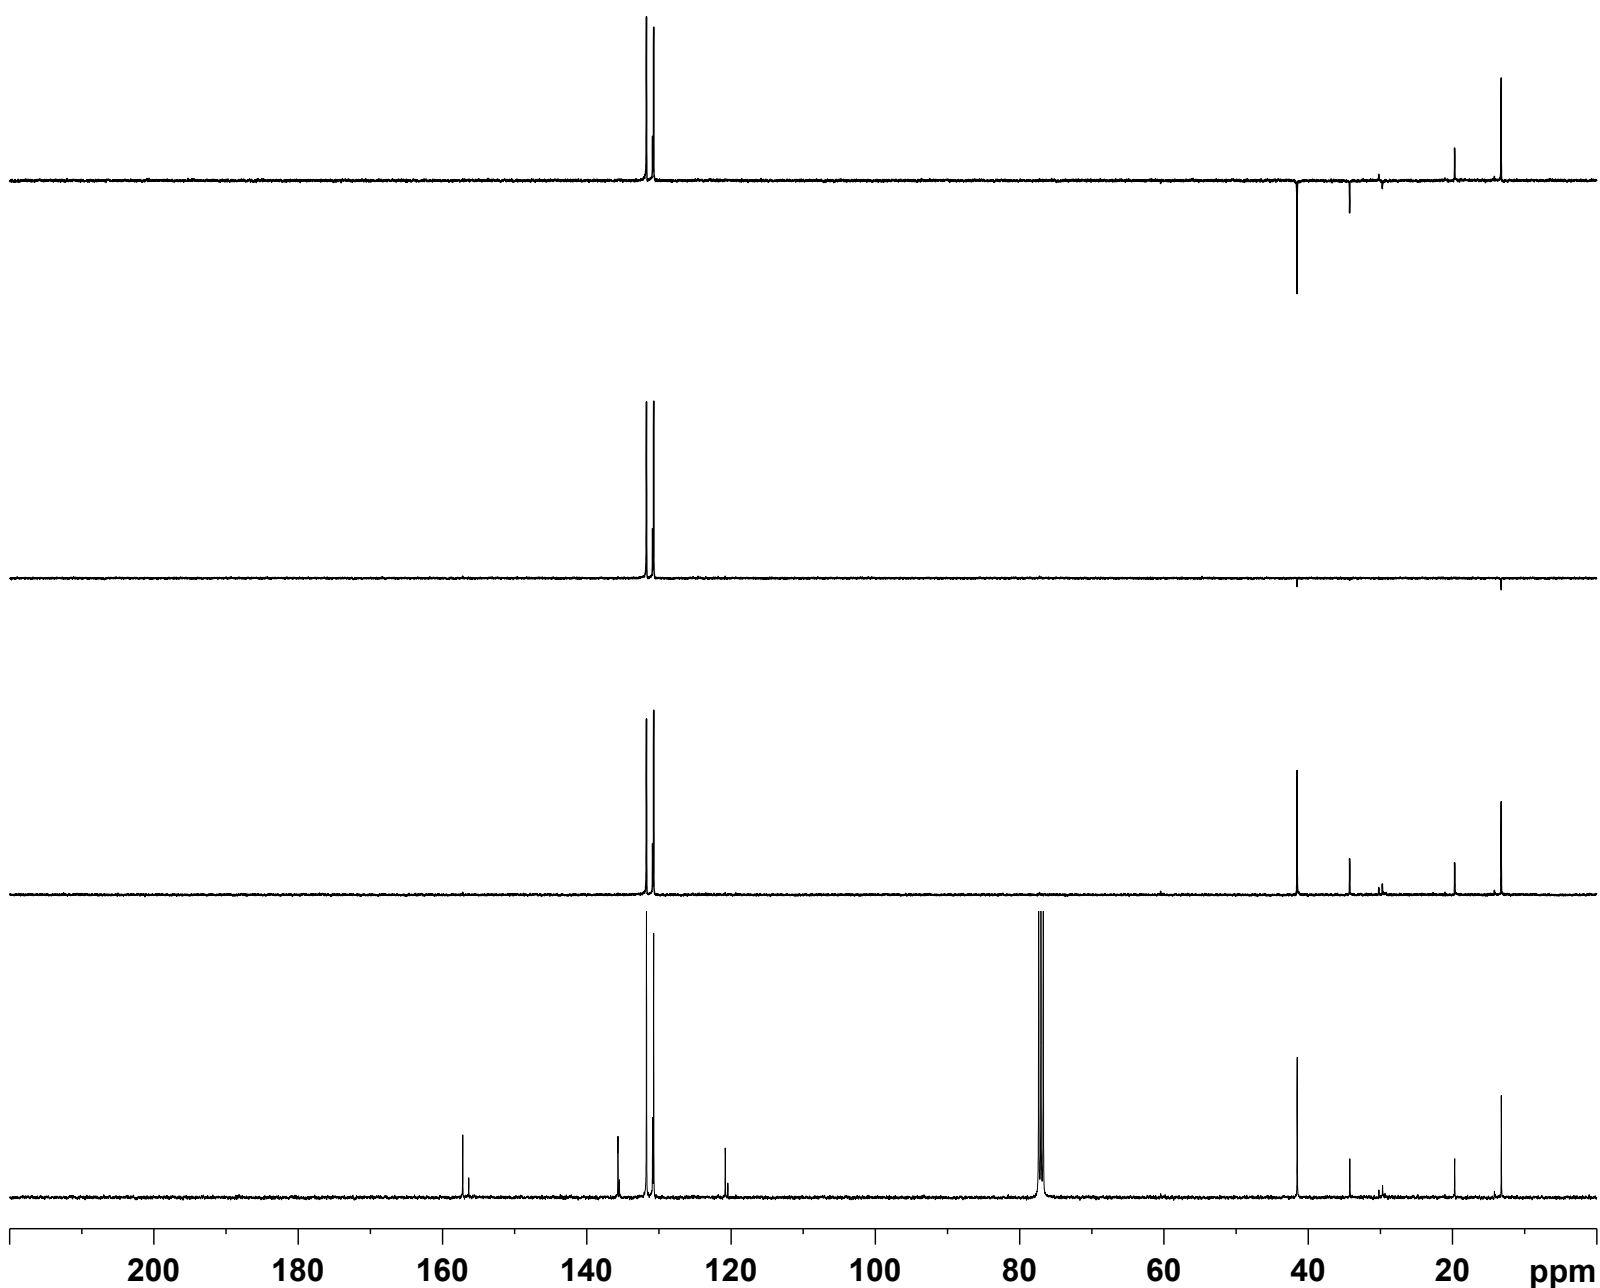

Current Data Parameters  
 NAME YYH-066  
 EXPNO 2  
 PROCNO 1

F2 - Acquisition Parameters  
 Date\_ 20210423  
 Time 18.09 h  
 INSTRUM spect  
 PROBHD Z108618\_0922 (  
 PULPROG zgpg30  
 TD 32768  
 SOLVENT CDC13  
 NS 1500  
 DS 0  
 SWH 24038.461 Hz  
 FIDRES 1.467191 Hz  
 AQ 0.6815744 sec  
 RG 210.28  
 DW 20.800 usec  
 DE 6.50 usec  
 TE 296.6 K  
 D1 2.00000000 sec  
 D11 0.03000000 sec  
 TD0 1  
 SFO1 100.6233329 MHz  
 NUC1 13C  
 P1 10.50 usec  
 PLW1 44.09999847 W  
 SFO2 400.1316005 MHz  
 NUC2 1H  
 CPDPRG[2 bi\_waltz65\_256  
 PCPD2 90.00 usec  
 PLW2 14.30000019 W  
 PLW12 0.37118000 W  
 PLW13 0.18640999 W

F2 - Processing parameters  
 SI 32768  
 SF 100.6127685 MHz  
 WDW EM  
 SSB 0  
 LB 2.00 Hz  
 GB 0  
 PC 1.00



HSQC of compound **2b** (E/Z isomers)

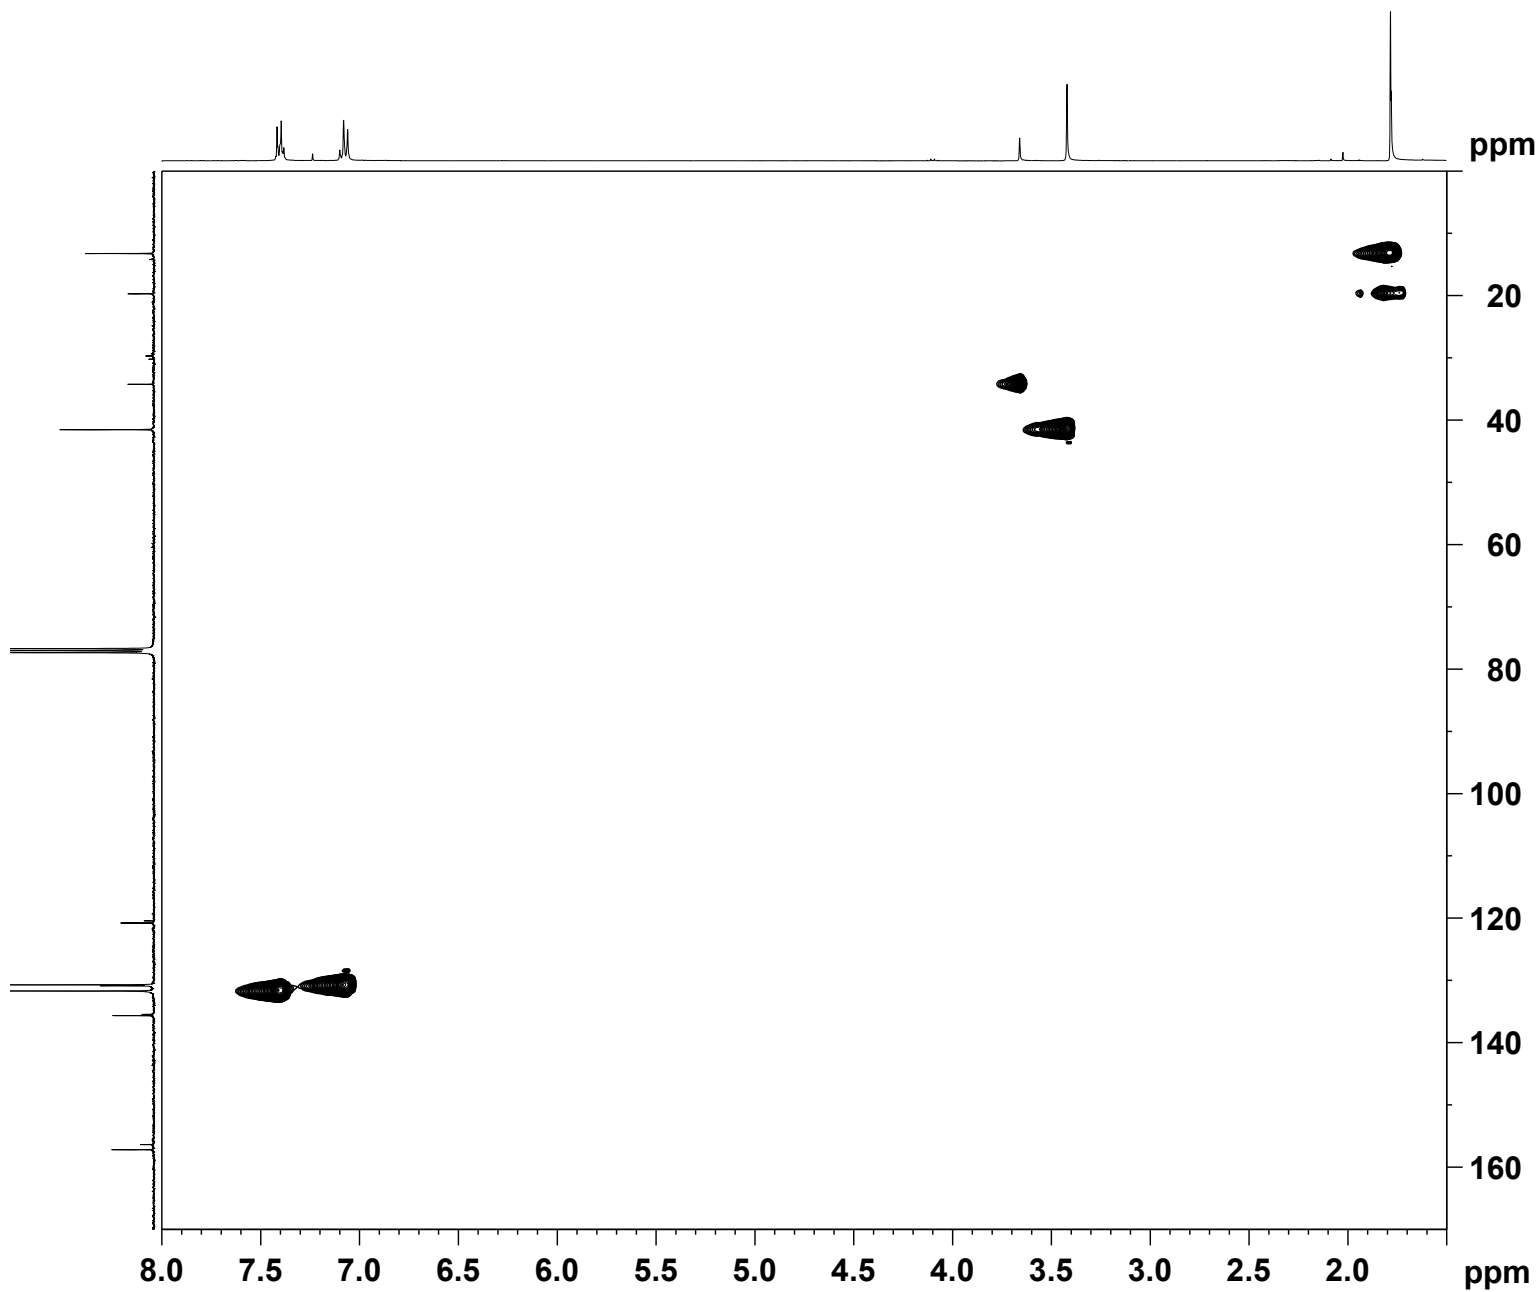

```

Current Data Parameters
NAME          YYH-066
EXPNO         6
PROCNO        1

F2 - Acquisition Parameters
Date_         20210422
Time          19.25 h
INSTRUM       spect
PROBHD        Z108618_0922 (
PULPROG       hsqcetgpsisp2.2
TD            2048
SOLVENT       CDCl3
NS            6
DS            16
SWH           8012.820 Hz
FIDRES        7.825020 Hz
AQ            0.1277952 sec
RG            210.28
DW            62.400 usec
DE            6.50 usec
TE            295.9 K
CNST2         145.0000000
CNST17        -0.5000000
D0            0.00000300 sec
D1            1.50000000 sec
D4            0.00172414 sec
D11           0.03000000 sec
D16           0.00020000 sec
D24           0.00086207 sec
IN0           0.00002080 sec
TDav          1
SFO1          400.1324008 MHz
NUC1          1H
P1            14.50 usec
P2            29.00 usec
P28           1000.00 usec
PLW1          12.69999981 W
SFO2          100.6233329 MHz
NUC2          13C
CPDPRG[2]     garp
P3            10.50 usec
P14           500.00 usec
P24           2000.00 usec
PCPD2         80.00 usec
PLW0          0 W
PLW2          44.00000000 W
PLW12         0.75796998 W
SPNAM[3]      Crp60,0.5,20.1
SFOAL3        0.500
SPOFFS3       0 Hz
SPW3          7.41179991 W
SPNAM[7]      Crp60comp.4
SFOAL7        0.500
SPOFFS7       0 Hz
SPW7          7.41179991 W
GPNAM[1]      SMSQ10.100
GPZ1          80.00 %
GPNAM[2]      SMSQ10.100
GPZ2          20.10 %
GPNAM[3]      SMSQ10.100
GPZ3          11.00 %
GPNAM[4]      SMSQ10.100
GPZ4          -5.00 %
P16           1000.00 usec
P19           600.00 usec

F1 - Acquisition parameters
TD            256
SFO1          100.6233 MHz
FIDRES        187.800476 Hz
SW            238.896 ppm
FnMODE        Echo-Antiecho

F2 - Processing parameters
SI            1024
SF            400.1300190 MHz
WDW           QSINE
SSB           2
LB            0 Hz
GB            0
PC            1.40

F1 - Processing parameters
SI            1024
MC2           echo-antiecho
SF            100.6127685 MHz
WDW           QSINE
SSB           2
LB            0 Hz
GB            0
    
```

COSY of compound **2b** (E/Z isomers)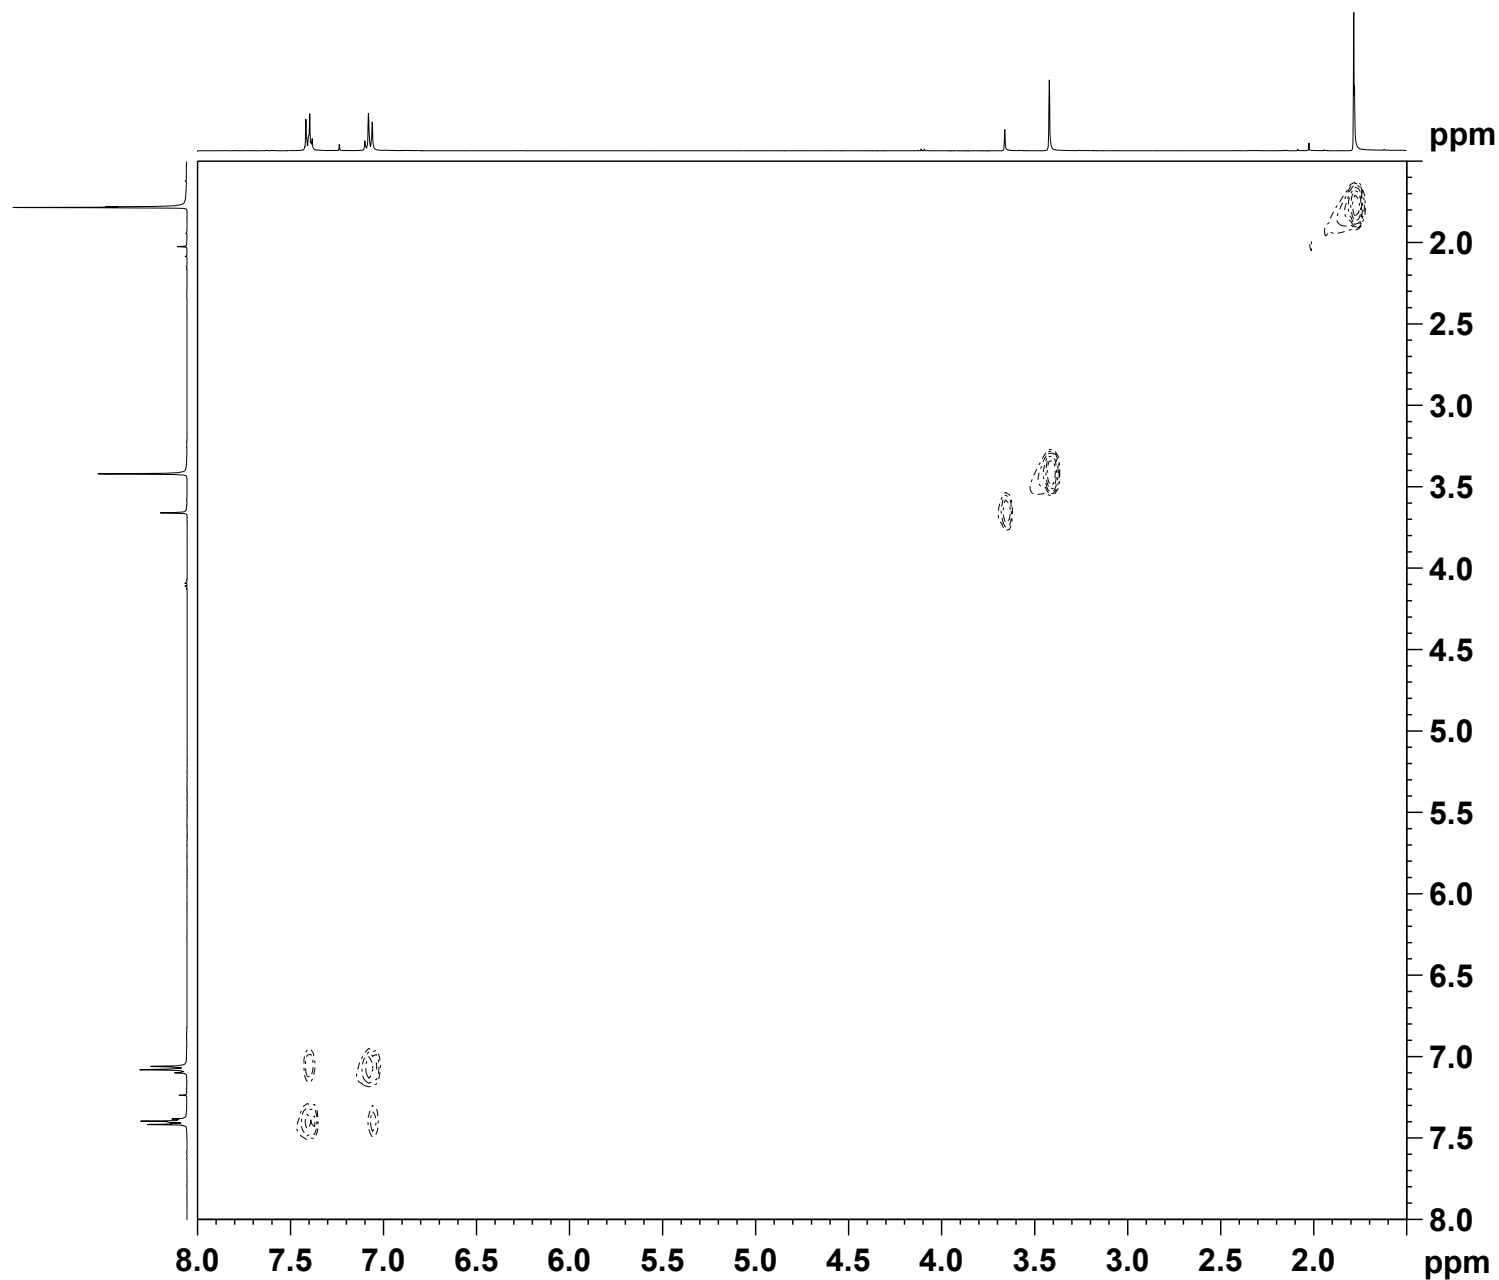

Current Data Parameters  
 NAME YYH-066  
 EXPNO 7  
 PROCNO 1

F2 - Acquisition Parameters  
 Date\_ 20210422  
 Time 20.08 h  
 INSTRUM spect  
 PROBHD Z108618\_0922 (  
 PULPROG cosygpppqf  
 TD 2048  
 SOLVENT CDCl3  
 NS 3  
 DS 16  
 SWH 8012.820 Hz  
 FIDRES 7.825020 Hz  
 AQ 0.1277952 sec  
 RG 210.28  
 DW 62.400 usec  
 DE 6.50 usec  
 TE 296.3 K  
 D0 0.00000300 sec  
 D1 2.00000000 sec  
 D11 0.03000000 sec  
 D12 0.00002000 sec  
 D13 0.00000400 sec  
 D16 0.00020000 sec  
 IN0 0.00012480 sec  
 T Dav 1  
 SFO1 400.1324008 MHz  
 NUC1 1H  
 P0 14.50 usec  
 P1 14.50 usec  
 P17 2500.00 usec  
 PLW1 12.69999981 W  
 PLW10 2.96690011 W  
 GPNAM[1] SMSQ10.100  
 GPZ1 10.00 %  
 P16 1000.00 usec

F1 - Acquisition parameters  
 TD 256  
 SFO1 400.1324 MHz  
 FIDRES 62.600159 Hz  
 SW 20.025 ppm  
 FnmODE QF

F2 - Processing parameters  
 SI 1024  
 SF 400.1300190 MHz  
 WDW QSINE  
 SSB 0  
 LB 0 Hz  
 GB 0  
 PC 1.40

F1 - Processing parameters  
 SI 1024  
 MC2 QF  
 SF 400.1300190 MHz  
 WDW QSINE  
 SSB 0  
 LB 0 Hz  
 GB 0

NOESY of compound **2b** (E/Z isomers)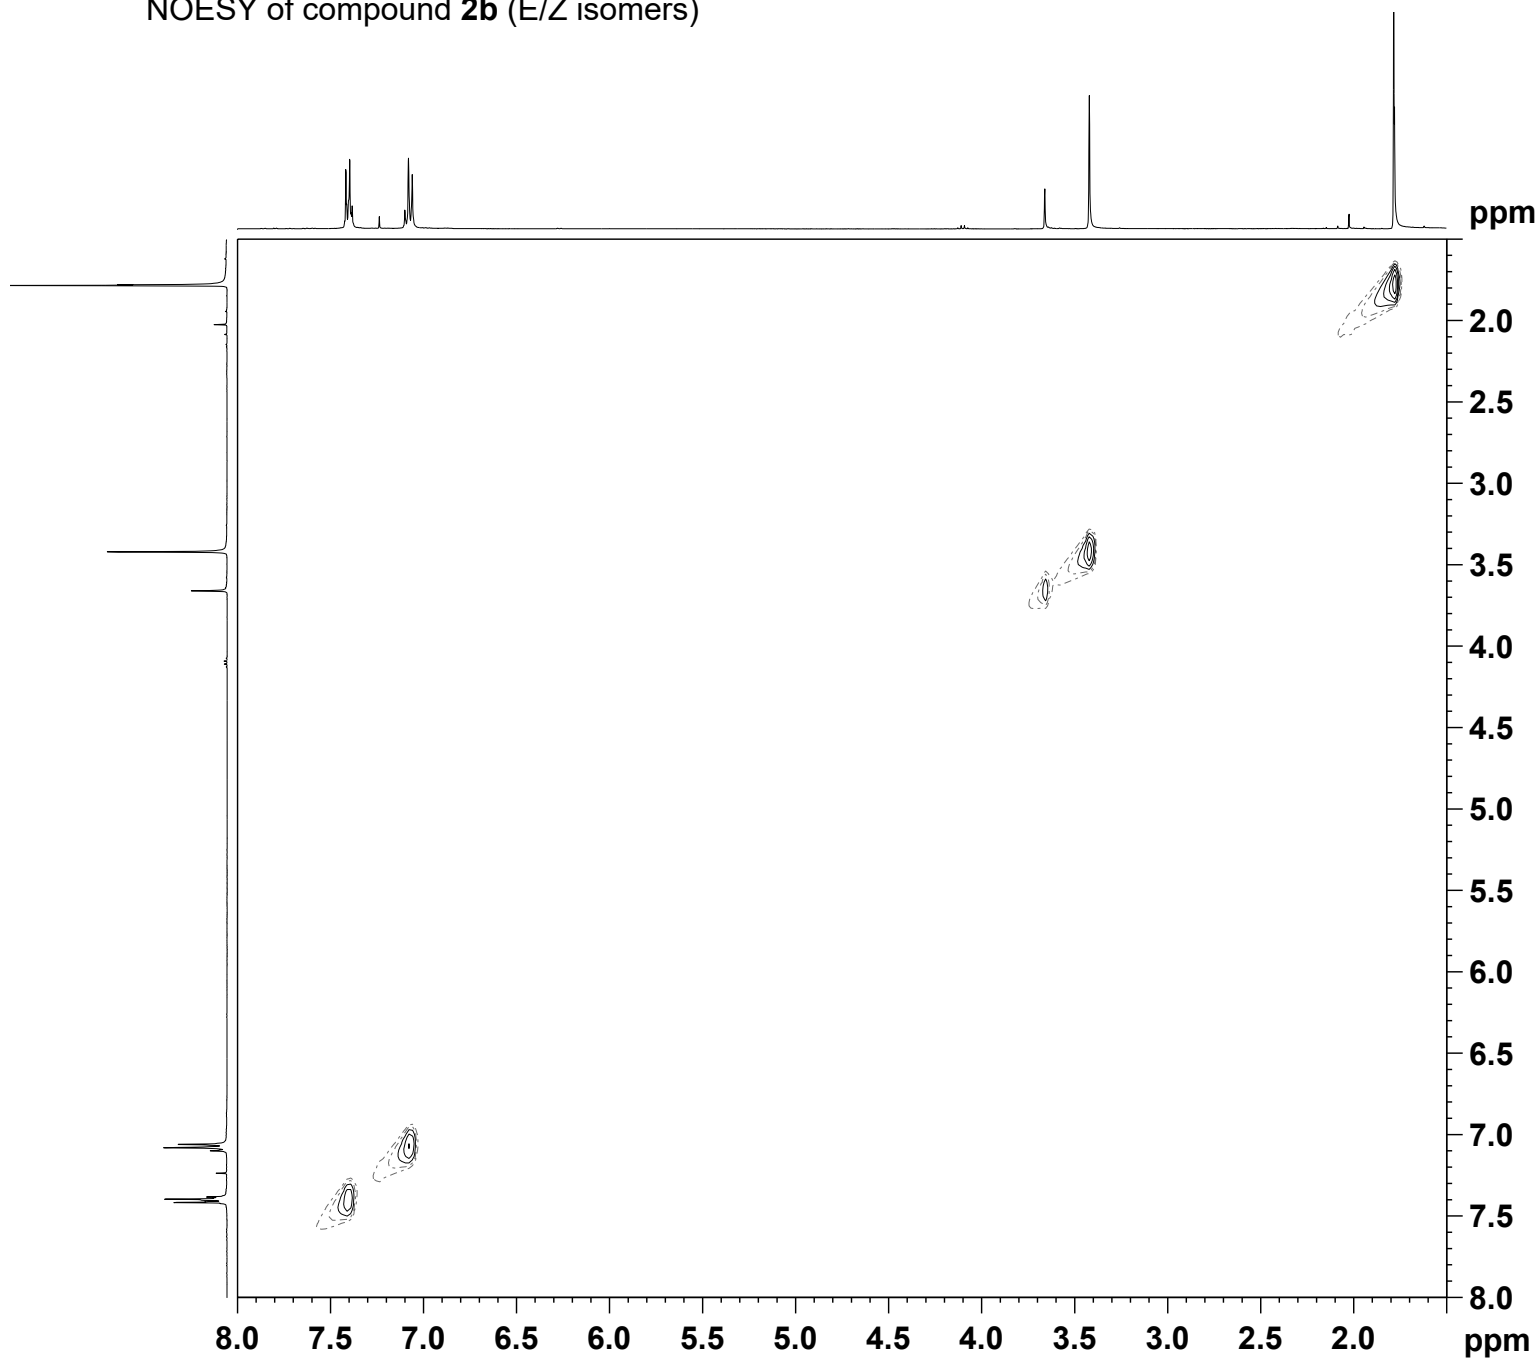

Current Data Parameters  
 NAME YYH-066  
 EXPNO 8  
 PROCNO 1

F2 - Acquisition Parameters  
 Date 20210422  
 Time 20.37 h  
 INSTRUM spect  
 PROBHD Z108618\_0922 (  
 PULPROG noesygpphpp  
 TD 2048  
 SOLVENT CDCl3  
 NS 3  
 DS 16  
 SWH 8012.820 Hz  
 FIDRES 7.825020 Hz  
 AQ 0.1277952 sec  
 RG 112.98  
 DW 62.400 usec  
 DE 6.50 usec  
 TE 295.8 K  
 D0 0.00004394 sec  
 D1 2.00000000 sec  
 D8 0.40000001 sec  
 D11 0.03000000 sec  
 D12 0.00002000 sec  
 D16 0.00020000 sec  
 IN0 0.00012480 sec  
 TDev 1  
 SFO1 400.1324008 MHz  
 NUC1 1H  
 P1 14.50 usec  
 P2 29.00 usec  
 P17 2500.00 usec  
 PLW1 12.69999981 W  
 PLW10 2.96690011 W  
 GPNAM[1] SMSQ10.100  
 GPZ1 40.00 %  
 P16 1000.00 usec

F1 - Acquisition parameters  
 TD 256  
 SFO1 400.1324 MHz  
 FIDRES 62.600159 Hz  
 SW 20.025 ppm  
 FnMODE States-TPPI

F2 - Processing parameters  
 SI 1024  
 SF 400.1300190 MHz  
 WDW QSINE  
 SSB 2  
 LB 0 Hz  
 GB 0  
 PC 1.40

F1 - Processing parameters  
 SI 1024  
 MC2 States-TPPI  
 SF 400.1300190 MHz  
 WDW QSINE  
 SSB 2  
 LB 0 Hz  
 GB 0

1H NMR (CDCl3, 400 MHz) of compound 2c

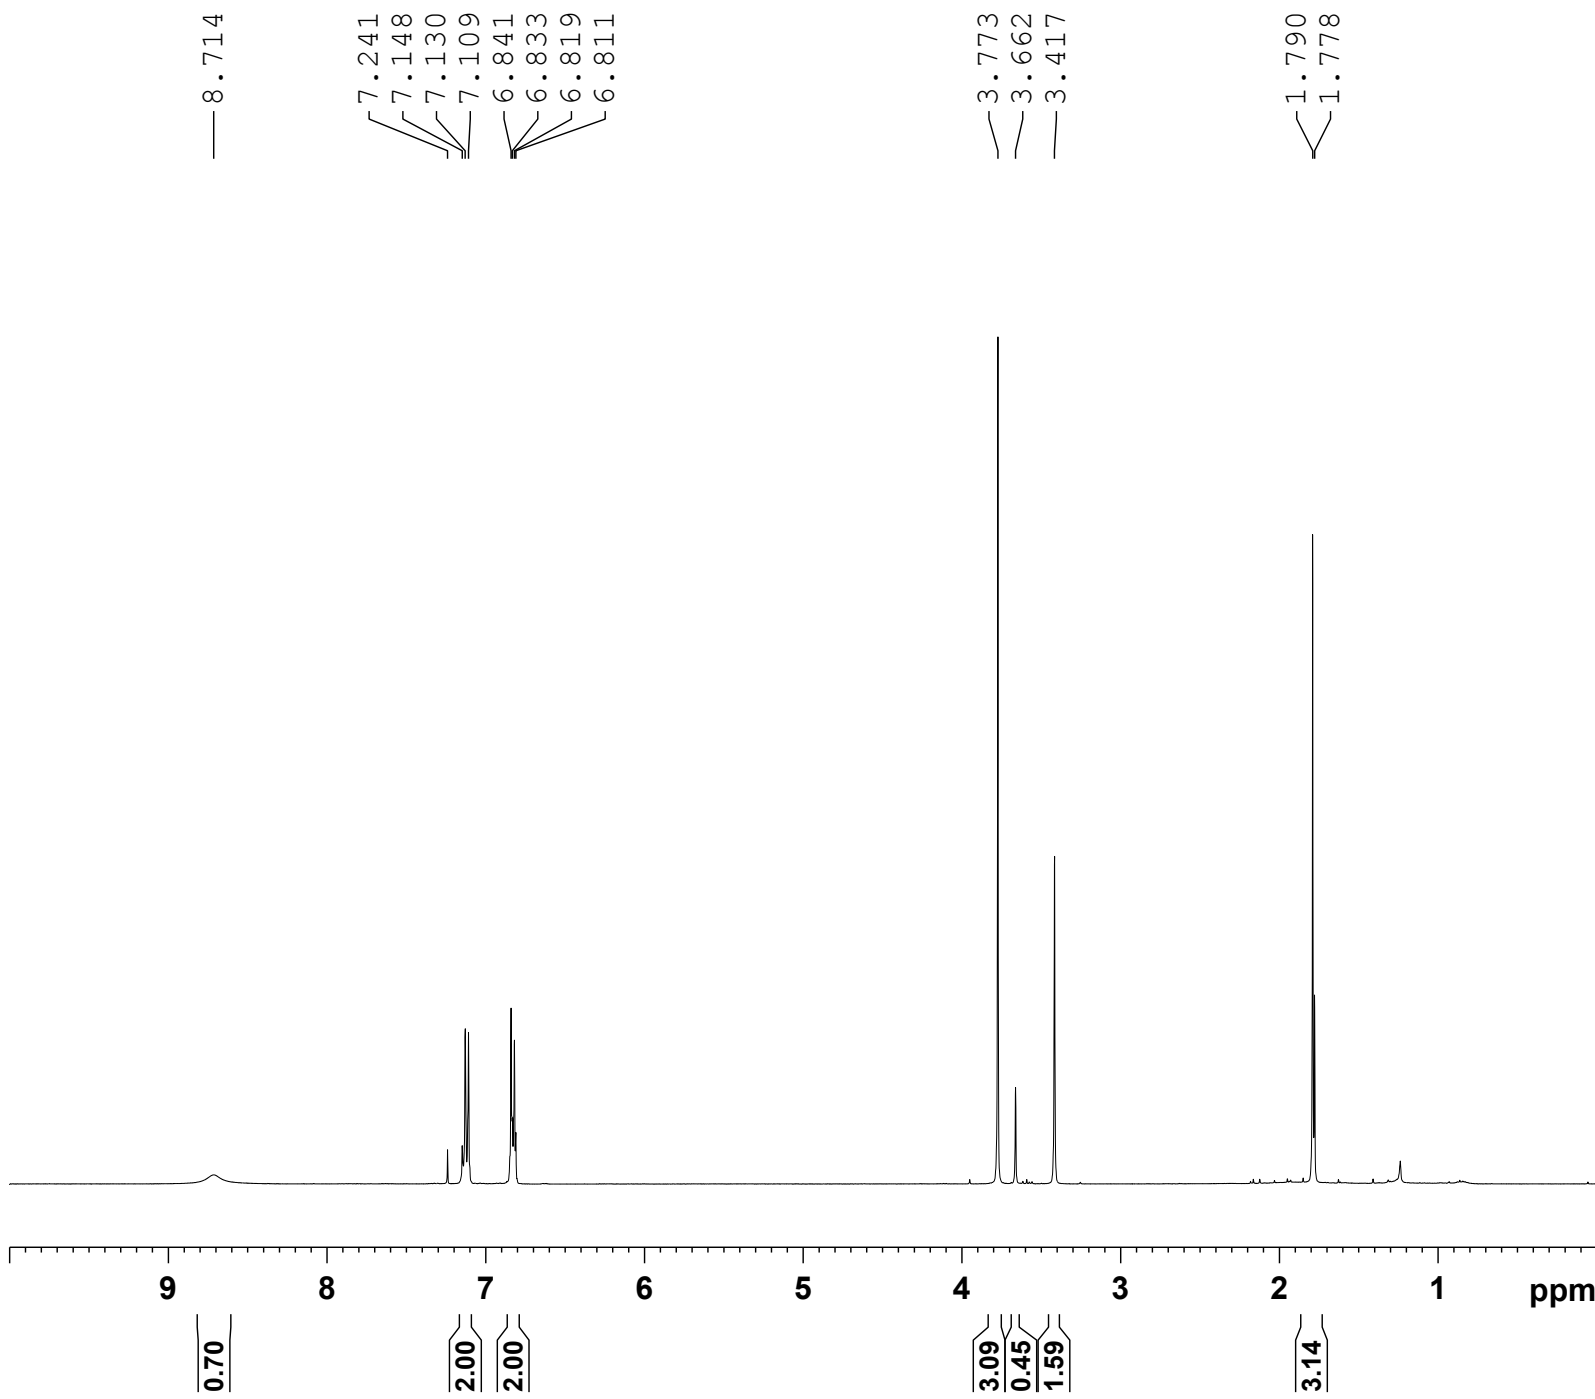

Current Data Parameters  
 NAME YYH-067  
 EXPNO 1  
 PROCNO 1

F2 - Acquisition Parameters  
 Date\_ 20210418  
 Time\_ 19.02 h  
 INSTRUM spect  
 PROBHD Z108618\_0922 (  
 PULPROG zg30  
 TD 32768  
 SOLVENT CDCl3  
 NS 16  
 DS 0  
 SWH 8012.820 Hz  
 FIDRES 0.489064 Hz  
 AQ 2.0447233 sec  
 RG 128.5  
 DW 62.400 usec  
 DE 16.43 usec  
 TE 296.0 K  
 D1 2.00000000 sec  
 TD0 1  
 SFO1 400.1324008 MHz  
 NUC1 1H  
 P1 14.50 usec  
 PLW1 12.69999981 W

F2 - Processing parameters  
 SI 16384  
 SF 400.1300168 MHz  
 WDW EM  
 SSB 0  
 LB 0 Hz  
 GB 0  
 PC 1.00

<sup>13</sup>C NMR (CDCl<sub>3</sub>, 100 MHz) of compound **2c**

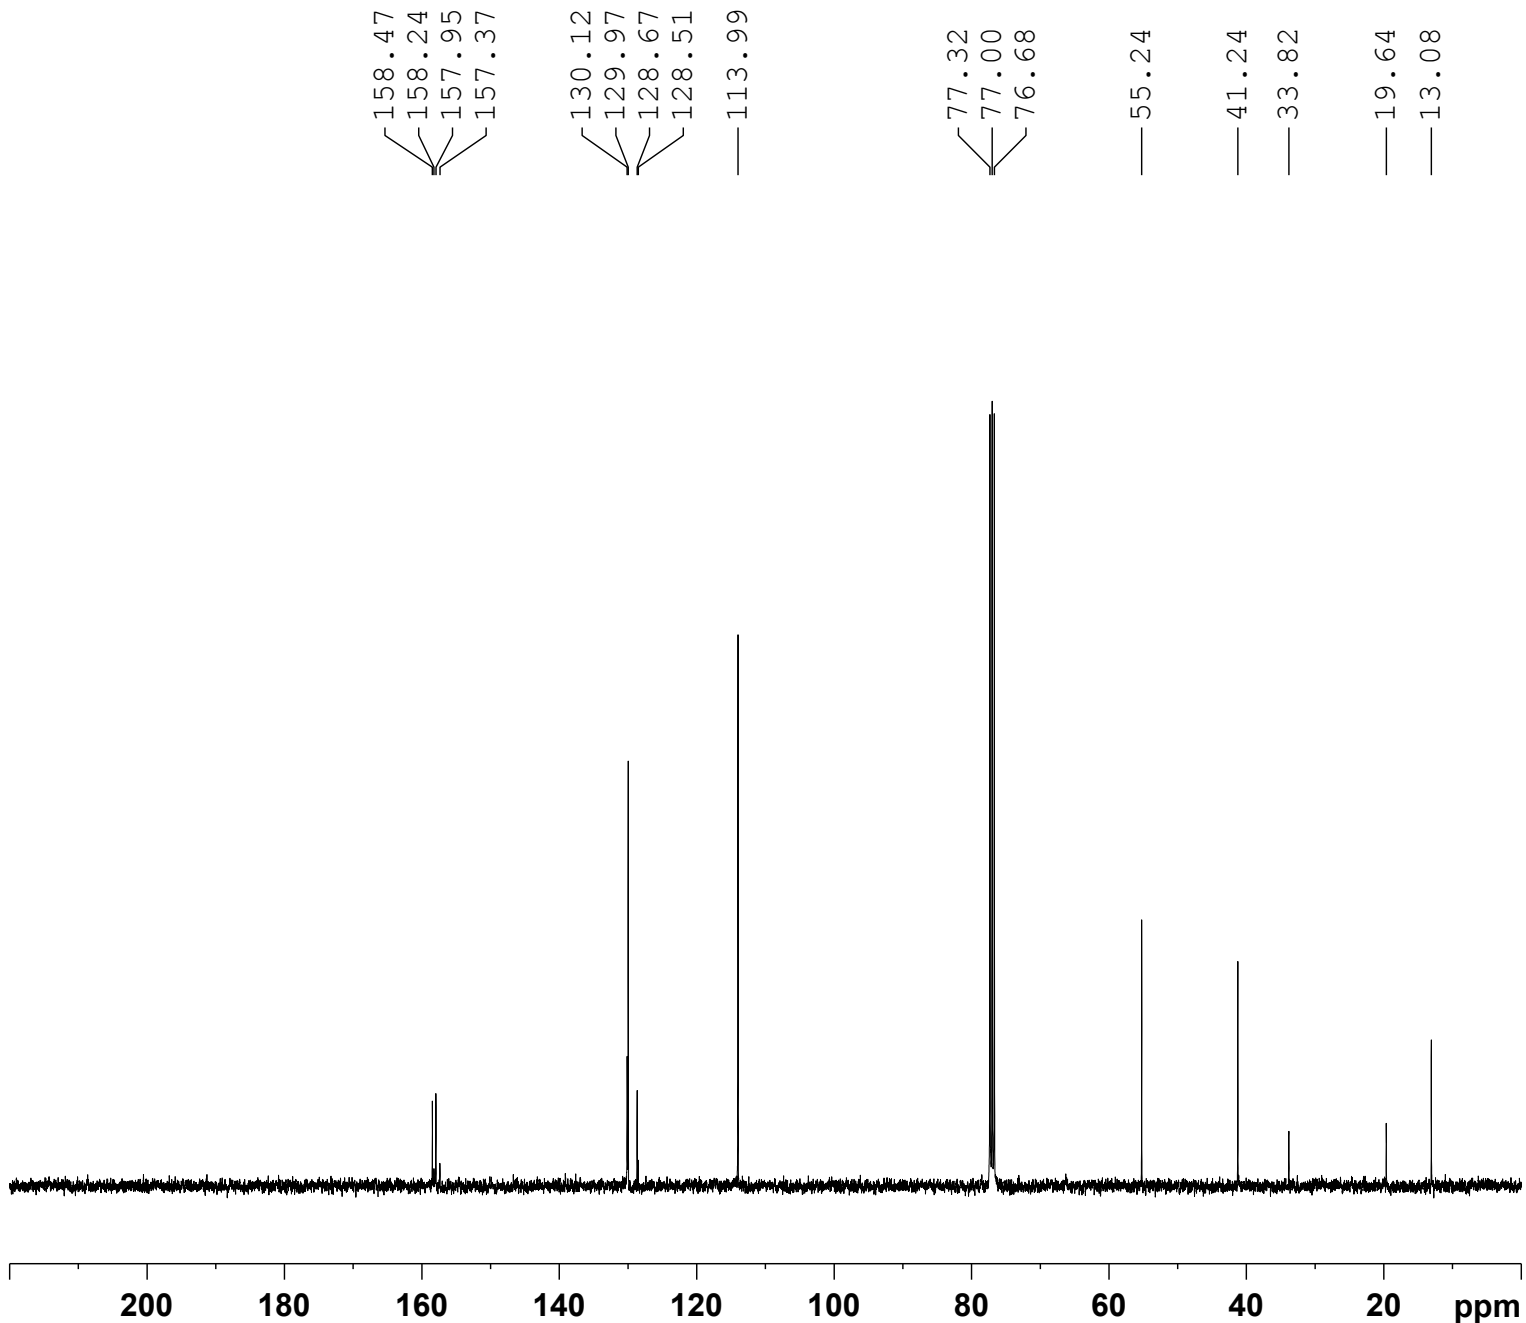

```

Current Data Parameters
NAME                YYH-067
EXPNO                2
PROCNO              1

F2 - Acquisition Parameters
Date_                20210418
Time_                19.11 h
INSTRUM              spect
PROBHD               Z108618_0922 (
PULPROG              zgpg30
TD                   32768
SOLVENT              CDC13
NS                   200
DS                   0
SWH                  24038.461 Hz
FIDRES               1.467191 Hz
AQ                   0.6815744 sec
RG                   210.28
DW                   20.800 usec
DE                   6.50 usec
TE                   296.9 K
D1                   2.00000000 sec
D11                  0.03000000 sec
TD0                  1
SFO1                 100.6233329 MHz
NUC1                 13C
P1                   10.50 usec
PLW1                 44.09999847 W
SFO2                 400.1316005 MHz
NUC2                 1H
CPDPRG[2]            bi_waltz65 256
PCPD2                90.00 usec
PLW2                 14.30000019 W
PLW12                0.37118000 W
PLW13                0.18640999 W

F2 - Processing parameters
SI                   32768
SF                   100.6127723 MHz
WDW                  EM
SSB                  0
LB                   2.00 Hz
GB                   0
PC                   1.00
    
```

DEPT of compound 2c

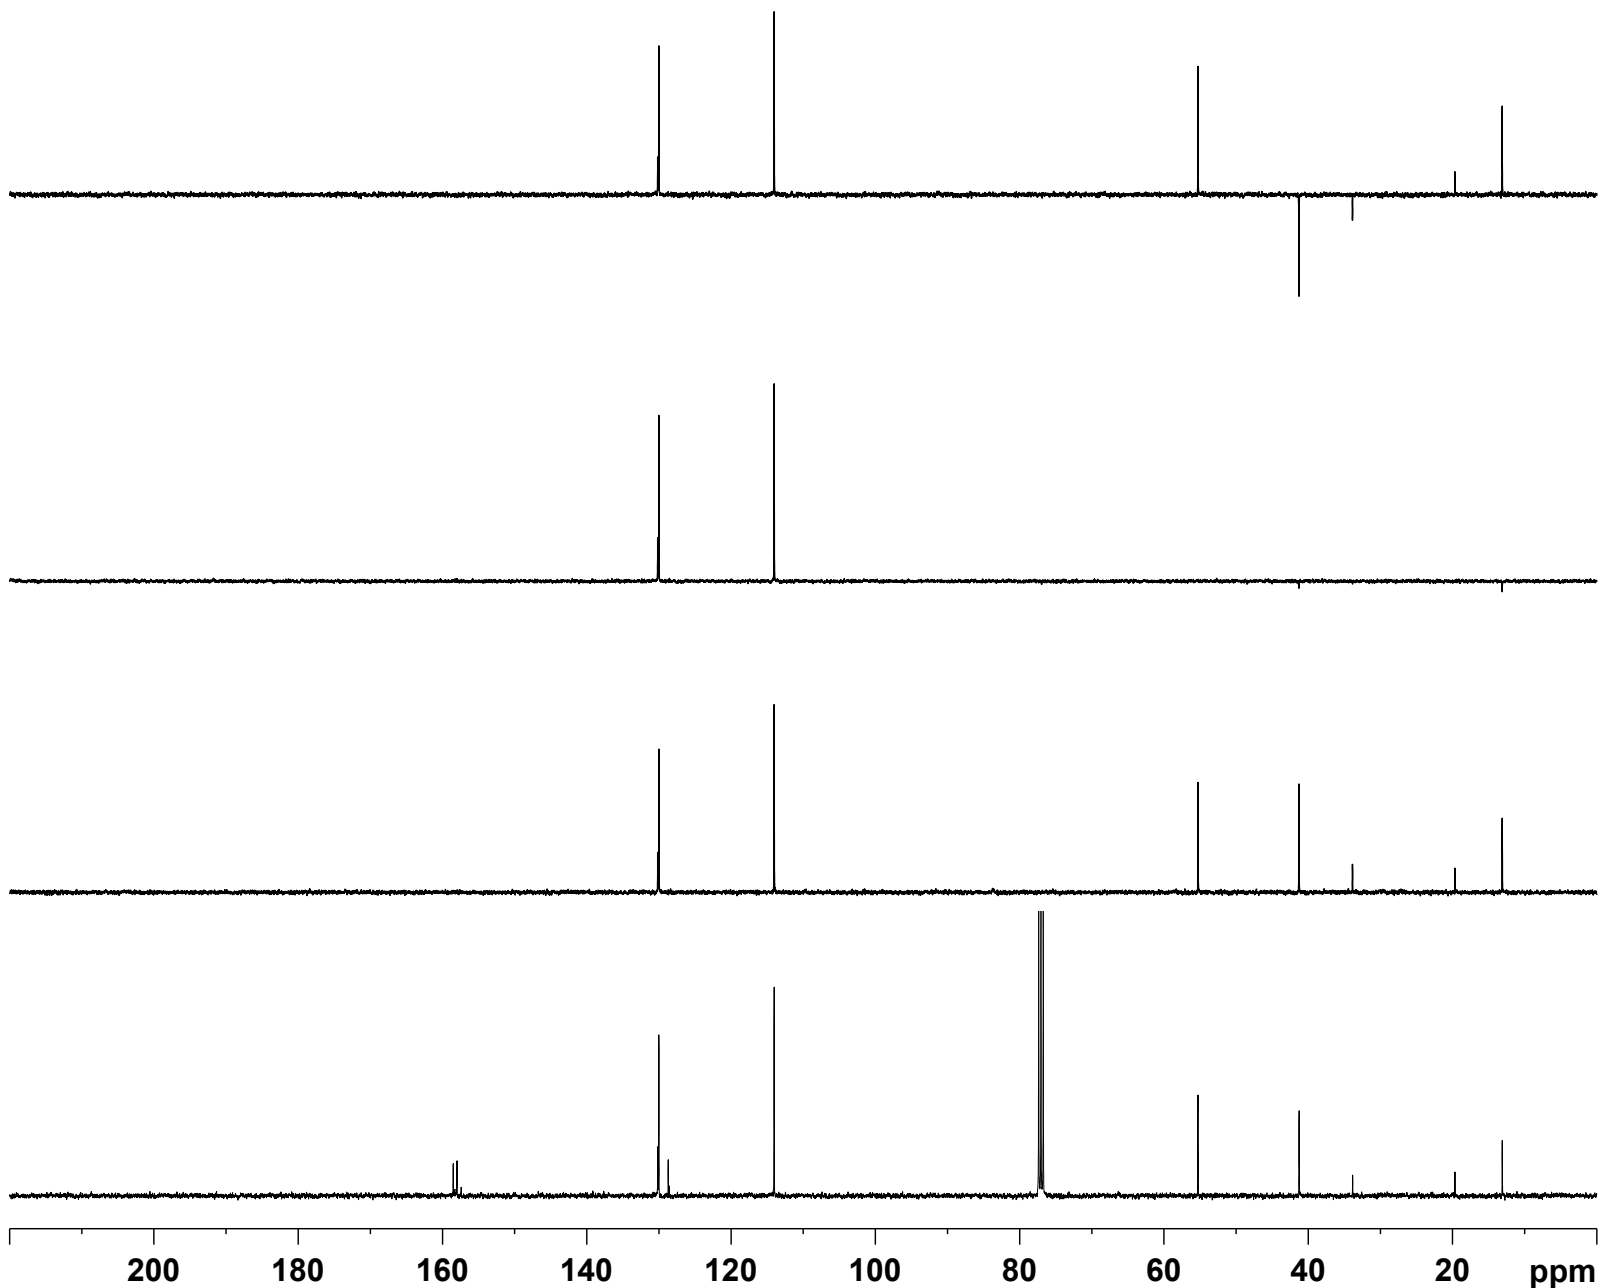

Current Data Parameters  
 NAME YYH-067  
 EXPNO 2  
 PROCNO 1

F2 - Acquisition Parameters  
 Date\_ 20210418  
 Time 19.11 h  
 INSTRUM spect  
 PROBHD z108618\_0922 (  
 PULPROG zgpg30  
 TD 32768  
 SOLVENT CDC13  
 NS 200  
 DS 0  
 SWH 24038.461 Hz  
 FIDRES 1.467191 Hz  
 AQ 0.6815744 sec  
 RG 210.28  
 DW 20.800 usec  
 DE 6.50 usec  
 TE 296.9 K  
 D1 2.00000000 sec  
 D11 0.03000000 sec  
 TD0 1  
 SFO1 100.6233329 MHz  
 NUC1 13C  
 P1 10.50 usec  
 PLW1 44.09999847 W  
 SFO2 400.1316005 MHz  
 NUC2 1H  
 CPDPRG[2 bi\_waltz65\_256  
 PCPD2 90.00 usec  
 PLW2 14.30000019 W  
 PLW12 0.37118000 W  
 PLW13 0.18640999 W

F2 - Processing parameters  
 SI 32768  
 SF 100.6127685 MHz  
 WDW EM  
 SSB 0  
 LB 2.00 Hz  
 GB 0  
 PC 1.00

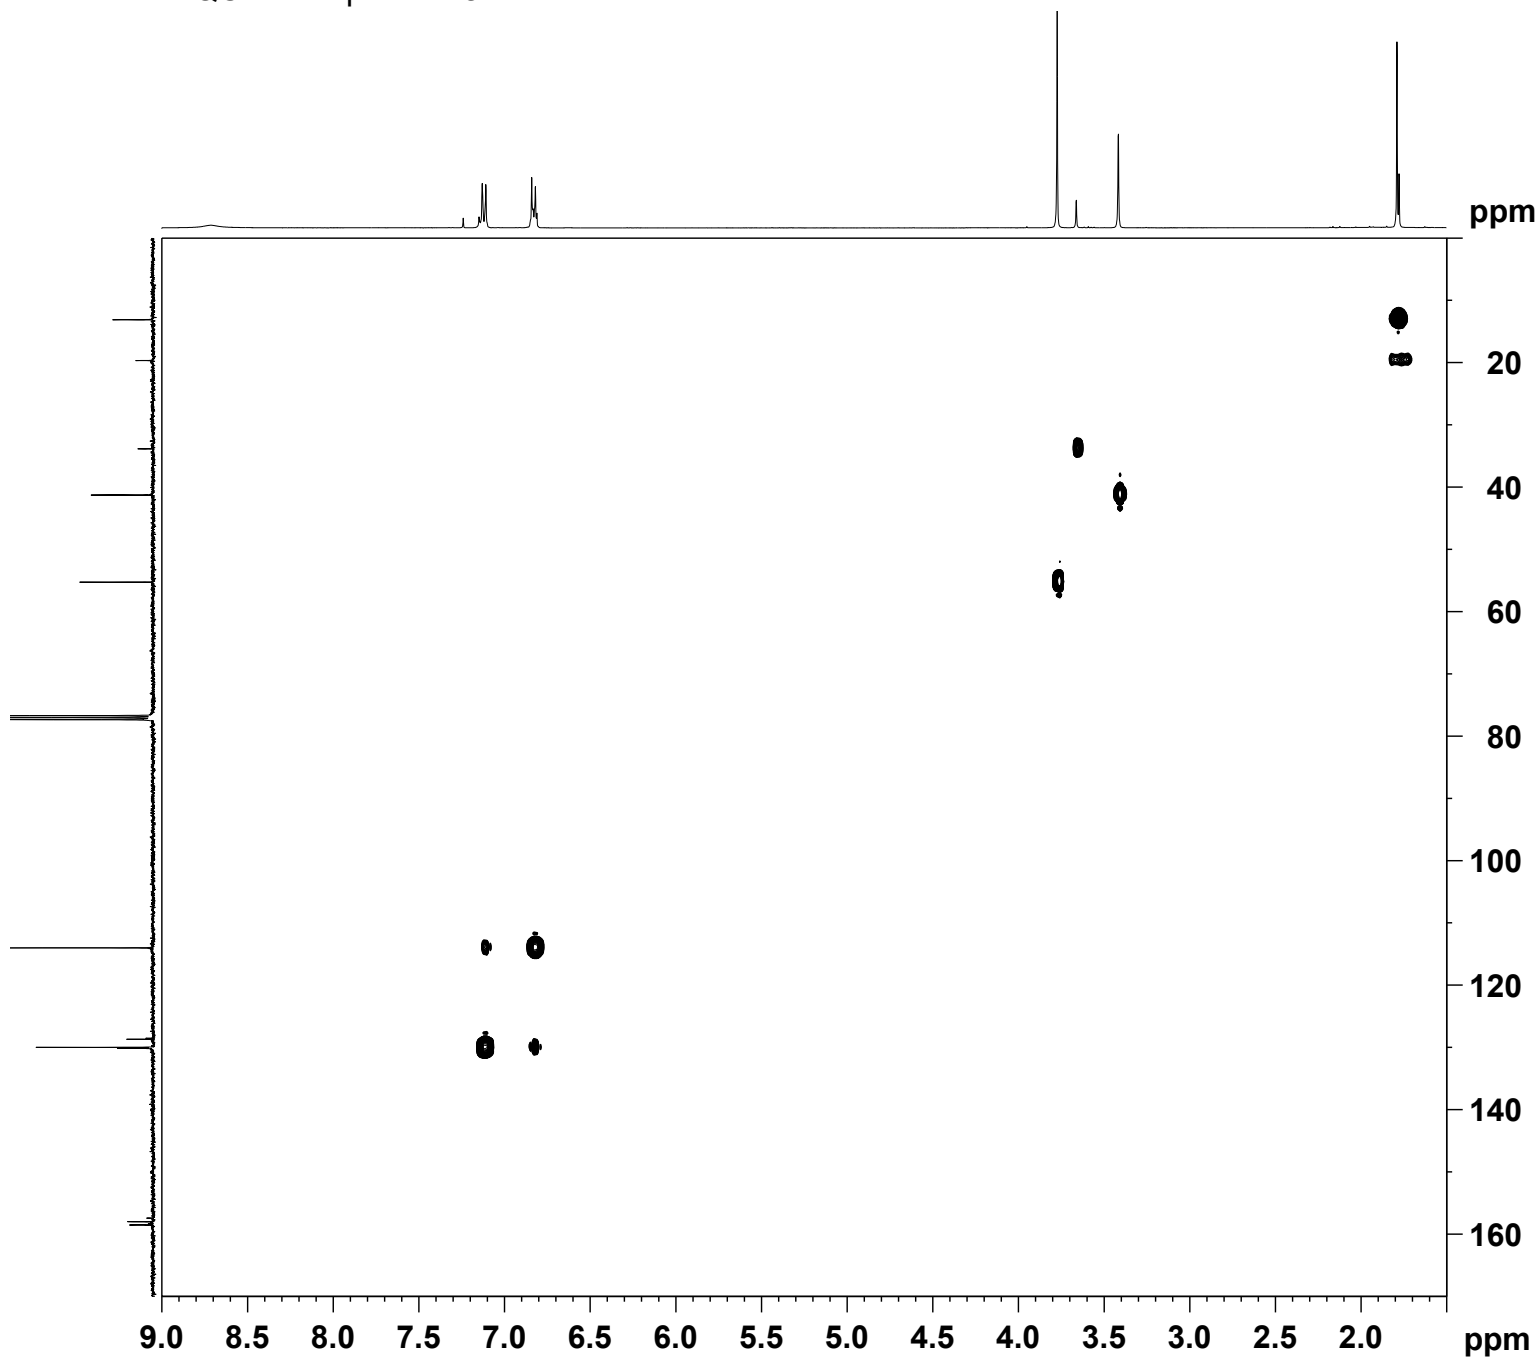

```

Current Data Parameters
NAME          YYH-067
EXPNO         6
PROCNO        1

F2 - Acquisition Parameters
Date_         20210418
Time          19.27 h
INSTRUM       spect
PROBHD        Z108618_0922 (
PULPROG       hsqcetgpsisp2.2
TD            2048
SOLVENT       CDCl3
NS            4
DS            16
SWH           8012.820 Hz
FIDRES        7.825020 Hz
AQ            0.1277952 sec
RG            210.28
DW            62.400 usec
DE            6.50 usec
TE            296.4 K
CNST2         145.0000000
CNST17        -0.5000000
D0            0.00000300 sec
D1            1.50000000 sec
D4            0.00172414 sec
D11           0.03000000 sec
D16           0.00020000 sec
D24           0.00086207 sec
IN0           0.00002080 sec
TDav          1
SFO1          400.1324008 MHz
NUC1          1H
P1            14.50 usec
P2            29.00 usec
P28           1000.00 usec
PLW1          12.69999981 W
SFO2          100.6233329 MHz
NUC2          13C
CPDPRG[2]    garp
P3            10.50 usec
P14           500.00 usec
P24           2000.00 usec
PCPD2         80.00 usec
PLW0          0 W
PLW2          44.00000000 W
PLW12         0.75796998 W
SPNAM[3]      Crp60,0.5,20.1
SFOAL3        0.500
SPOFFS3       0 Hz
SPW3          7.41179991 W
SPNAM[7]      Crp60comp.4
SFOAL7        0.500
SPOFFS7       0 Hz
SPW7          7.41179991 W
GPNAM[1]      SMSQ10.100
GPZ1          80.00 %
GPNAM[2]      SMSQ10.100
GPZ2          20.10 %
GPNAM[3]      SMSQ10.100
GPZ3          11.00 %
GPNAM[4]      SMSQ10.100
GPZ4          -5.00 %
P16           1000.00 usec
P19           600.00 usec

F1 - Acquisition parameters
TD            256
SFO1          100.6233 MHz
FIDRES        187.800476 Hz
SW            238.896 ppm
FnMODE        Echo-Antiecho

F2 - Processing parameters
SI            1024
SF            400.1300168 MHz
WDW           QSINE
SSB           2
LB            0 Hz
GB            0
PC            1.40

F1 - Processing parameters
SI            1024
MC2           echo-antiecho
SF            100.6127685 MHz
WDW           QSINE
SSB           2
LB            0 Hz
GB            0
    
```

COSY of compound 2c

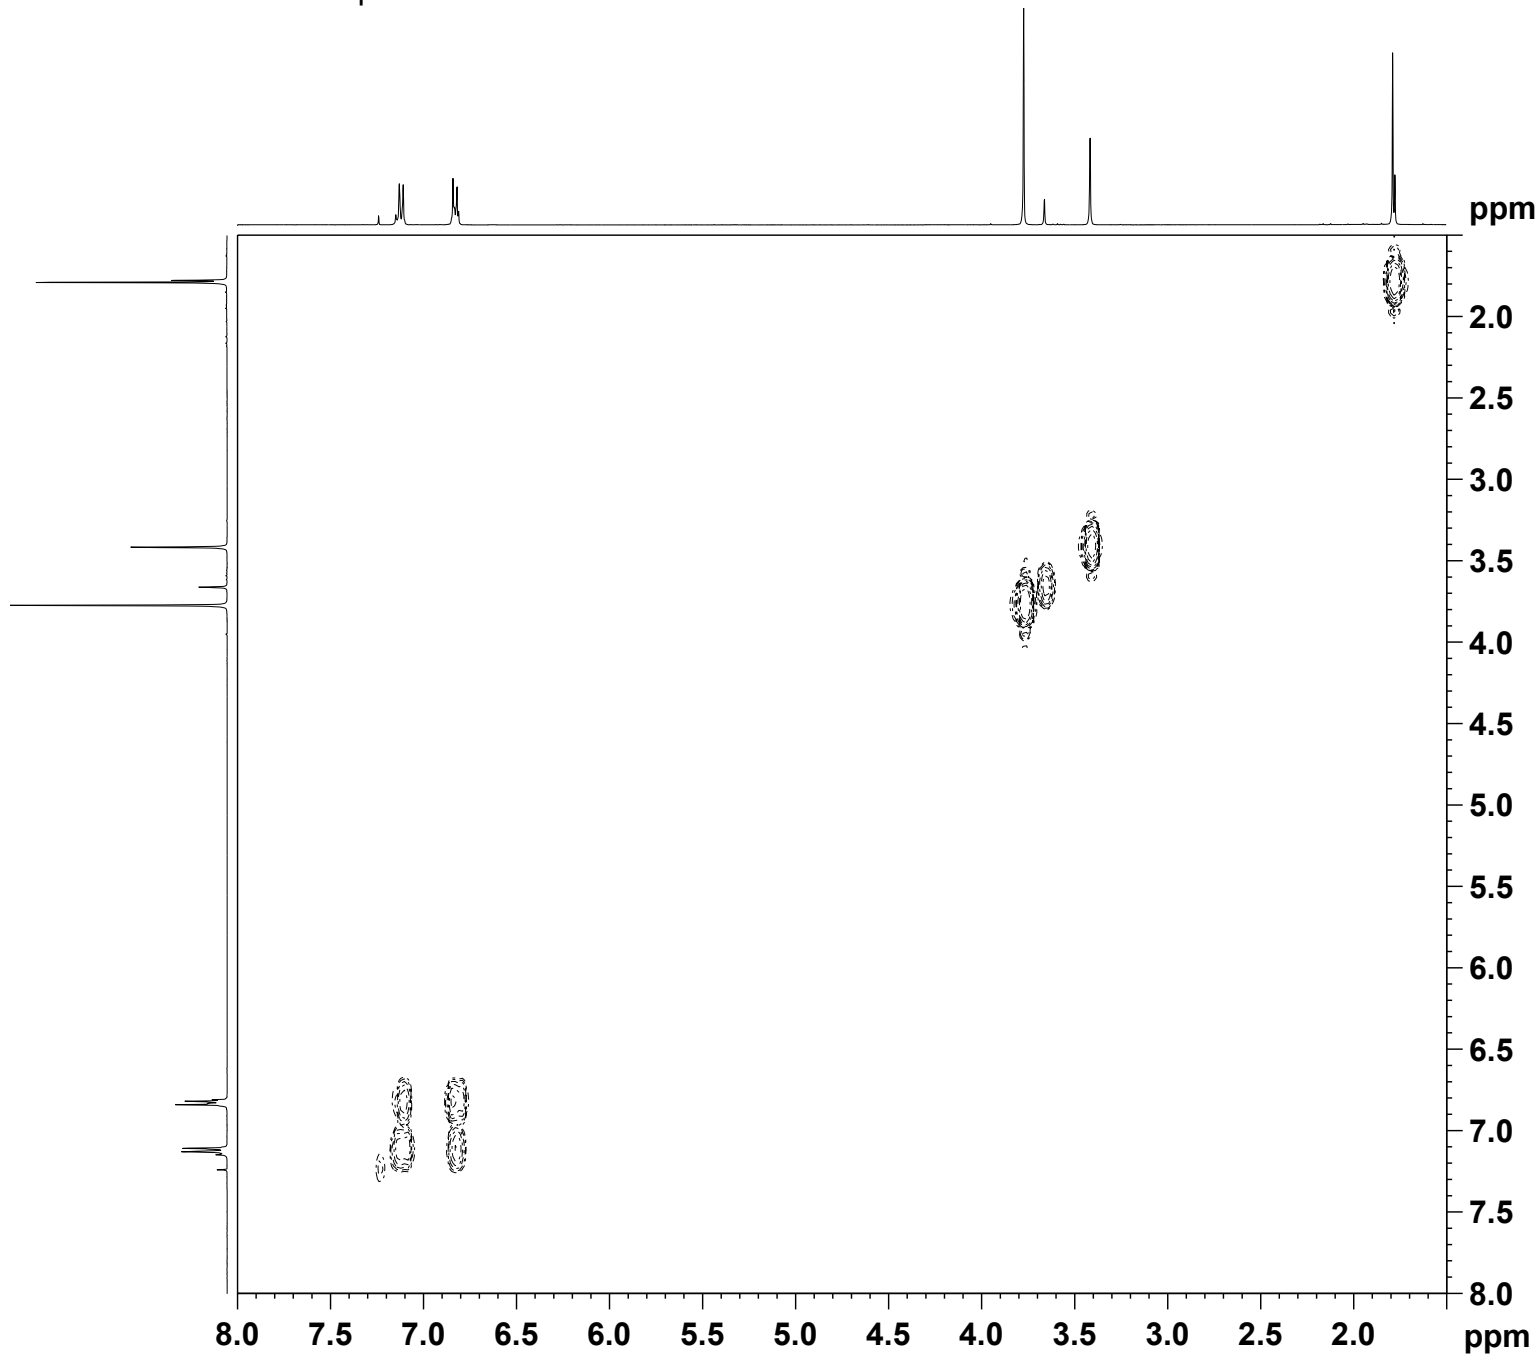

```

Current Data Parameters
NAME          YYH-067
EXPNO         7
PROCNO        1

F2 - Acquisition Parameters
Date_         20210418
Time          19.56 h
INSTRUM       spect
PROBHD        Z108618 0922 (
PULPROG       cosygppppqf
TD            2048
SOLVENT       CDCl3
NS            4
DS            16
SWH           8012.820 Hz
FIDRES        7.825020 Hz
AQ            0.1277952 sec
RG            210.28
DW            62.400 usec
DE            6.50 usec
TE            296.4 K
D0            0.00000300 sec
D1            2.00000000 sec
D11           0.03000000 sec
D12           0.00002000 sec
D13           0.00000400 sec
D16           0.00020000 sec
IN0           0.00012480 sec
TDav          1
SFO1          400.1324008 MHz
NUC1          1H
P0            14.50 usec
P1            14.50 usec
P17           2500.00 usec
PLW1          12.69999981 W
PLW10         2.96690011 W
GPNAM[1]      SMSQ10.100
GPZ1          10.00 %
P16           1000.00 usec

F1 - Acquisition parameters
TD            256
SFO1          400.1324 MHz
FIDRES        62.600159 Hz
SW            20.025 ppm
FnMODE        QF

F2 - Processing parameters
SI            1024
SF            400.1300168 MHz
WDW           QSINE
SSB           0
LB            0 Hz
GB            0
PC            1.40

F1 - Processing parameters
SI            1024
MC2           QF
SF            400.1300168 MHz
WDW           QSINE
SSB           0
LB            0 Hz
GB            0
    
```



## NOESY of compound 2c

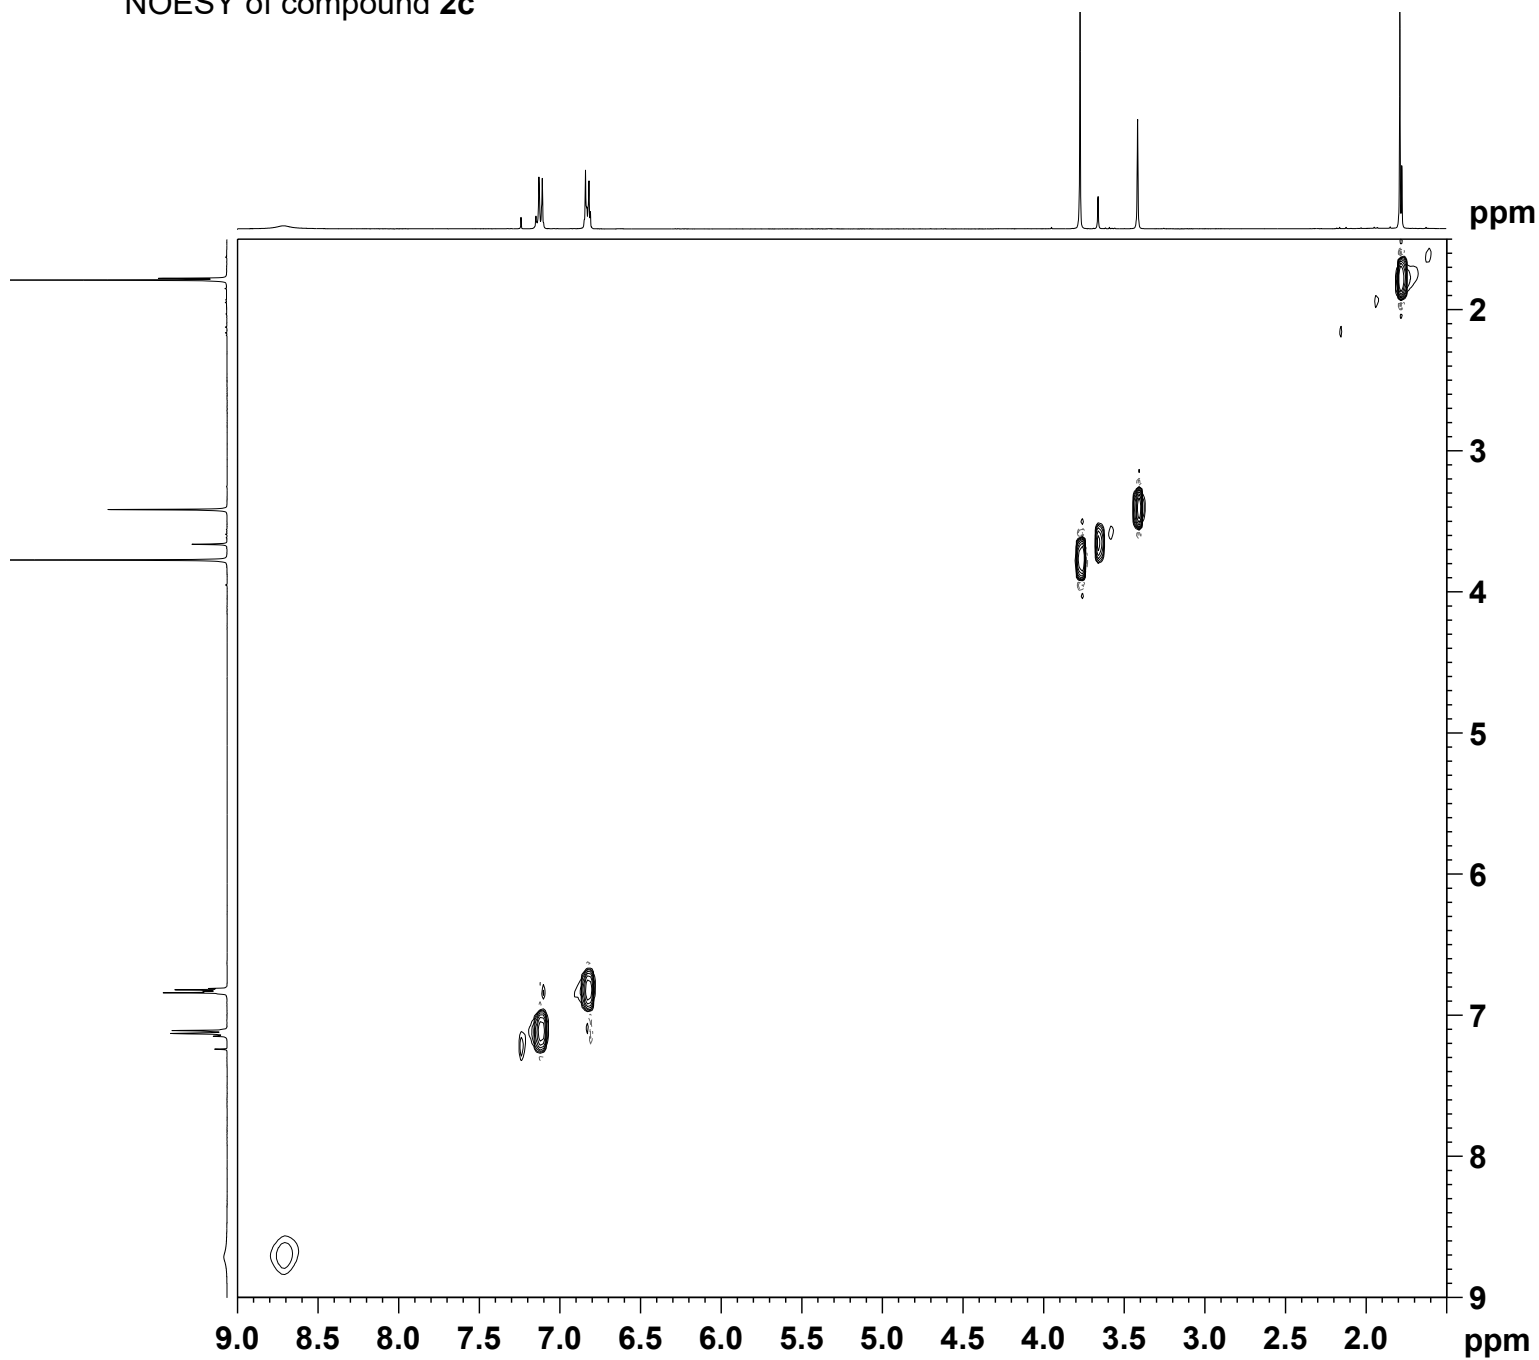

Current Data Parameters  
 NAME YYH-067  
 EXPNO 8  
 PROCNO 1

F2 - Acquisition Parameters  
 Date 20210418  
 Time 20.35 h  
 INSTRUM spect  
 PROBHD Z108618\_0922 (  
 PULPROG noesygpphpp  
 TD 2048  
 SOLVENT CDCl3  
 NS 5  
 DS 16  
 SWH 8012.820 Hz  
 FIDRES 7.825020 Hz  
 AQ 0.1277952 sec  
 RG 112.98  
 DW 62.400 usec  
 DE 6.50 usec  
 TE 295.8 K  
 D0 0.00004394 sec  
 D1 2.00000000 sec  
 D8 0.40000001 sec  
 D11 0.03000000 sec  
 D12 0.00002000 sec  
 D16 0.00020000 sec  
 IN0 0.00012480 sec  
 T Dav 1  
 SFO1 400.1324008 MHz  
 NUC1 1H  
 P1 14.50 usec  
 P2 29.00 usec  
 P17 2500.00 usec  
 PLW1 12.69999981 W  
 PLW10 2.96690011 W  
 GPNAM[1] SMSQ10.100  
 GPZ1 40.00 %  
 P16 1000.00 usec

F1 - Acquisition parameters  
 TD 256  
 SFO1 400.1324 MHz  
 FIDRES 62.600159 Hz  
 SW 20.025 ppm  
 FnmODE States-TPPI

F2 - Processing parameters  
 SI 1024  
 SF 400.1300168 MHz  
 WDW QSINE  
 SSB 2  
 LB 0 Hz  
 GB 0  
 PC 1.40

F1 - Processing parameters  
 SI 1024  
 MC2 States-TPPI  
 SF 400.1300168 MHz  
 WDW QSINE  
 SSB 2  
 LB 0 Hz  
 GB 0

1H NMR (CDCl3, 400 MHz) of compound 2d

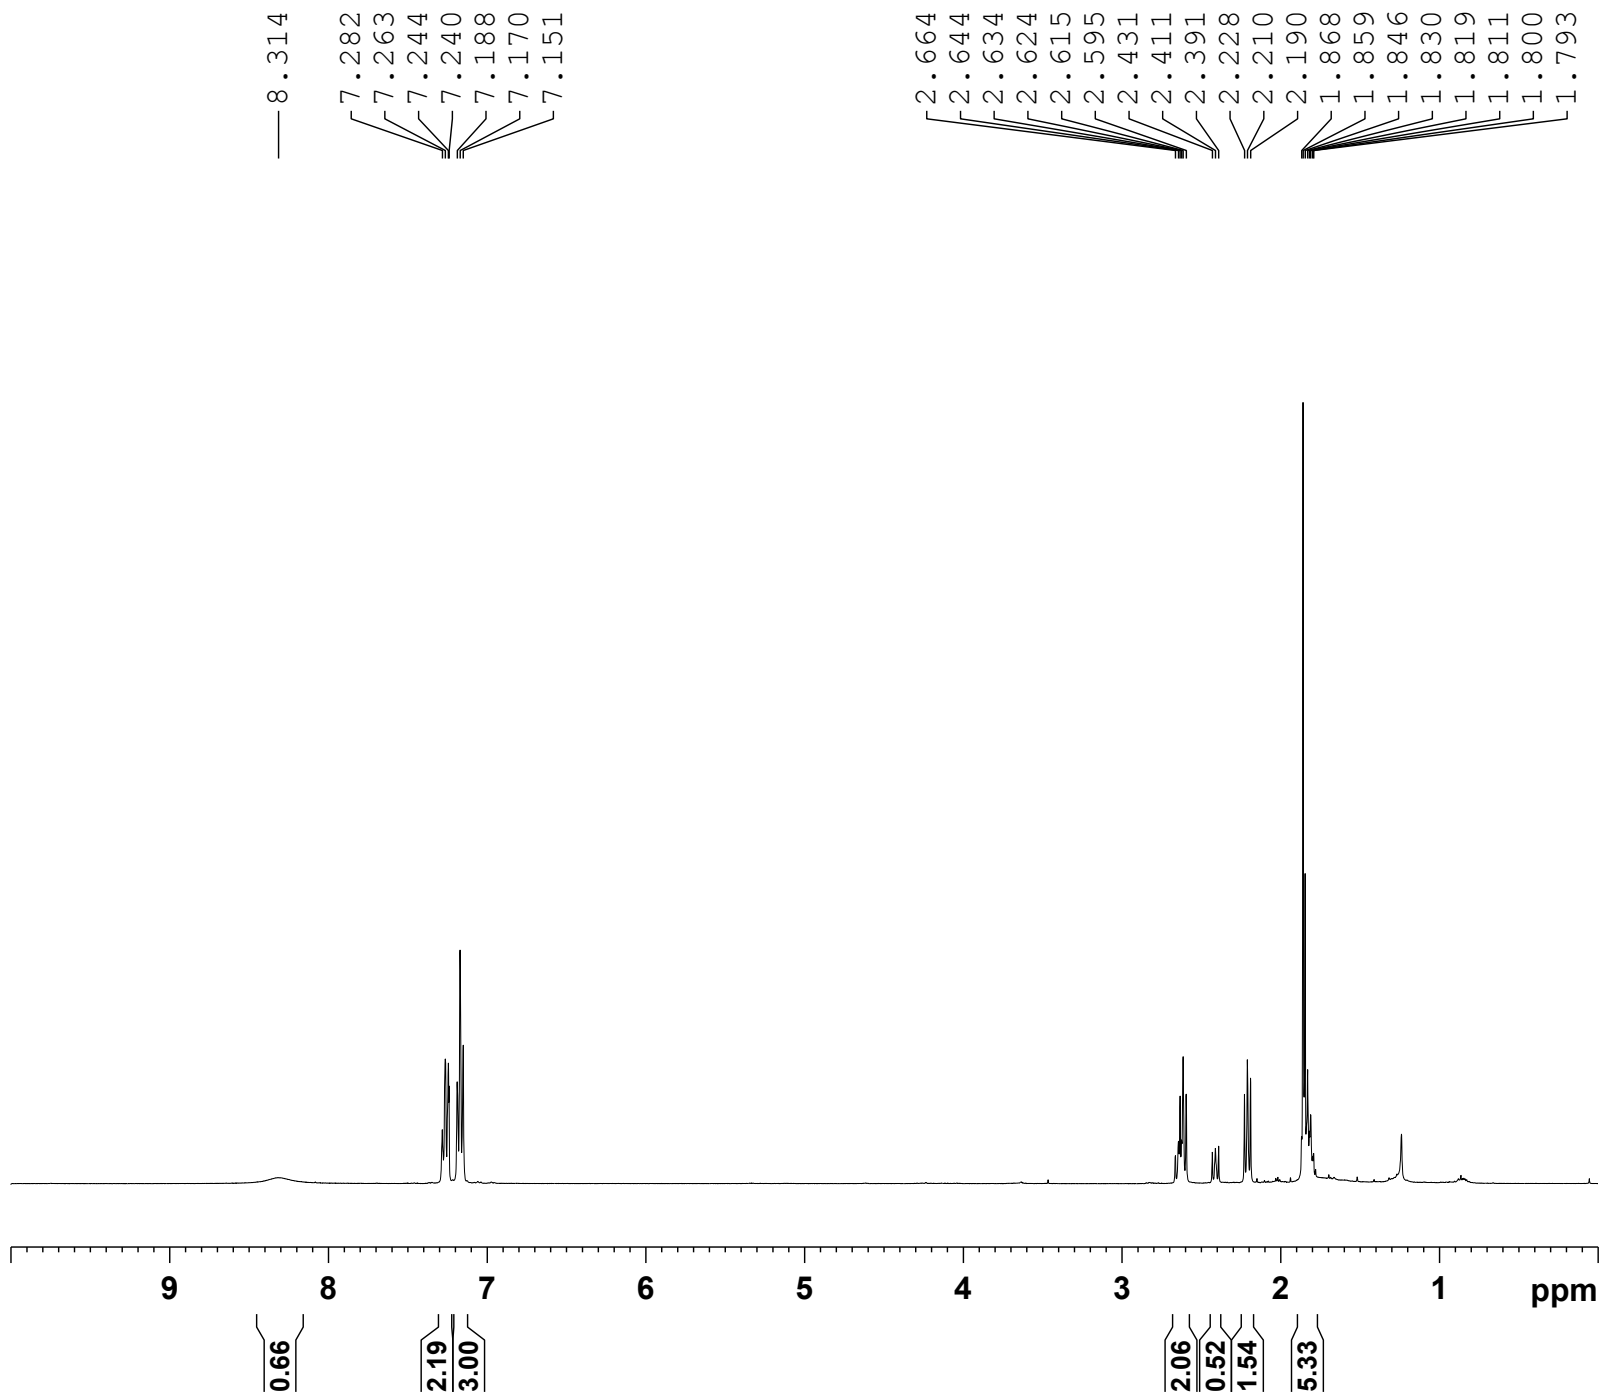

Current Data Parameters  
 NAME YYH-068  
 EXPNO 1  
 PROCNO 1

F2 - Acquisition Parameters  
 Date\_ 20210421  
 Time\_ 21.52 h  
 INSTRUM spect  
 PROBHD z108618\_0922 (  
 PULPROG zg30  
 TD 32768  
 SOLVENT CDCl3  
 NS 16  
 DS 0  
 SWH 8012.820 Hz  
 FIDRES 0.489064 Hz  
 AQ 2.0447233 sec  
 RG 158.76  
 DW 62.400 usec  
 DE 16.43 usec  
 TE 295.9 K  
 D1 2.00000000 sec  
 TD0 1  
 SFO1 400.1324008 MHz  
 NUC1 1H  
 P1 14.50 usec  
 PLW1 12.69999981 W

F2 - Processing parameters  
 SI 16384  
 SF 400.1300178 MHz  
 WDW EM  
 SSB 0  
 LB 0 Hz  
 GB 0  
 PC 1.00

13C NMR (CDCl3, 100 MHz) of compound 2d

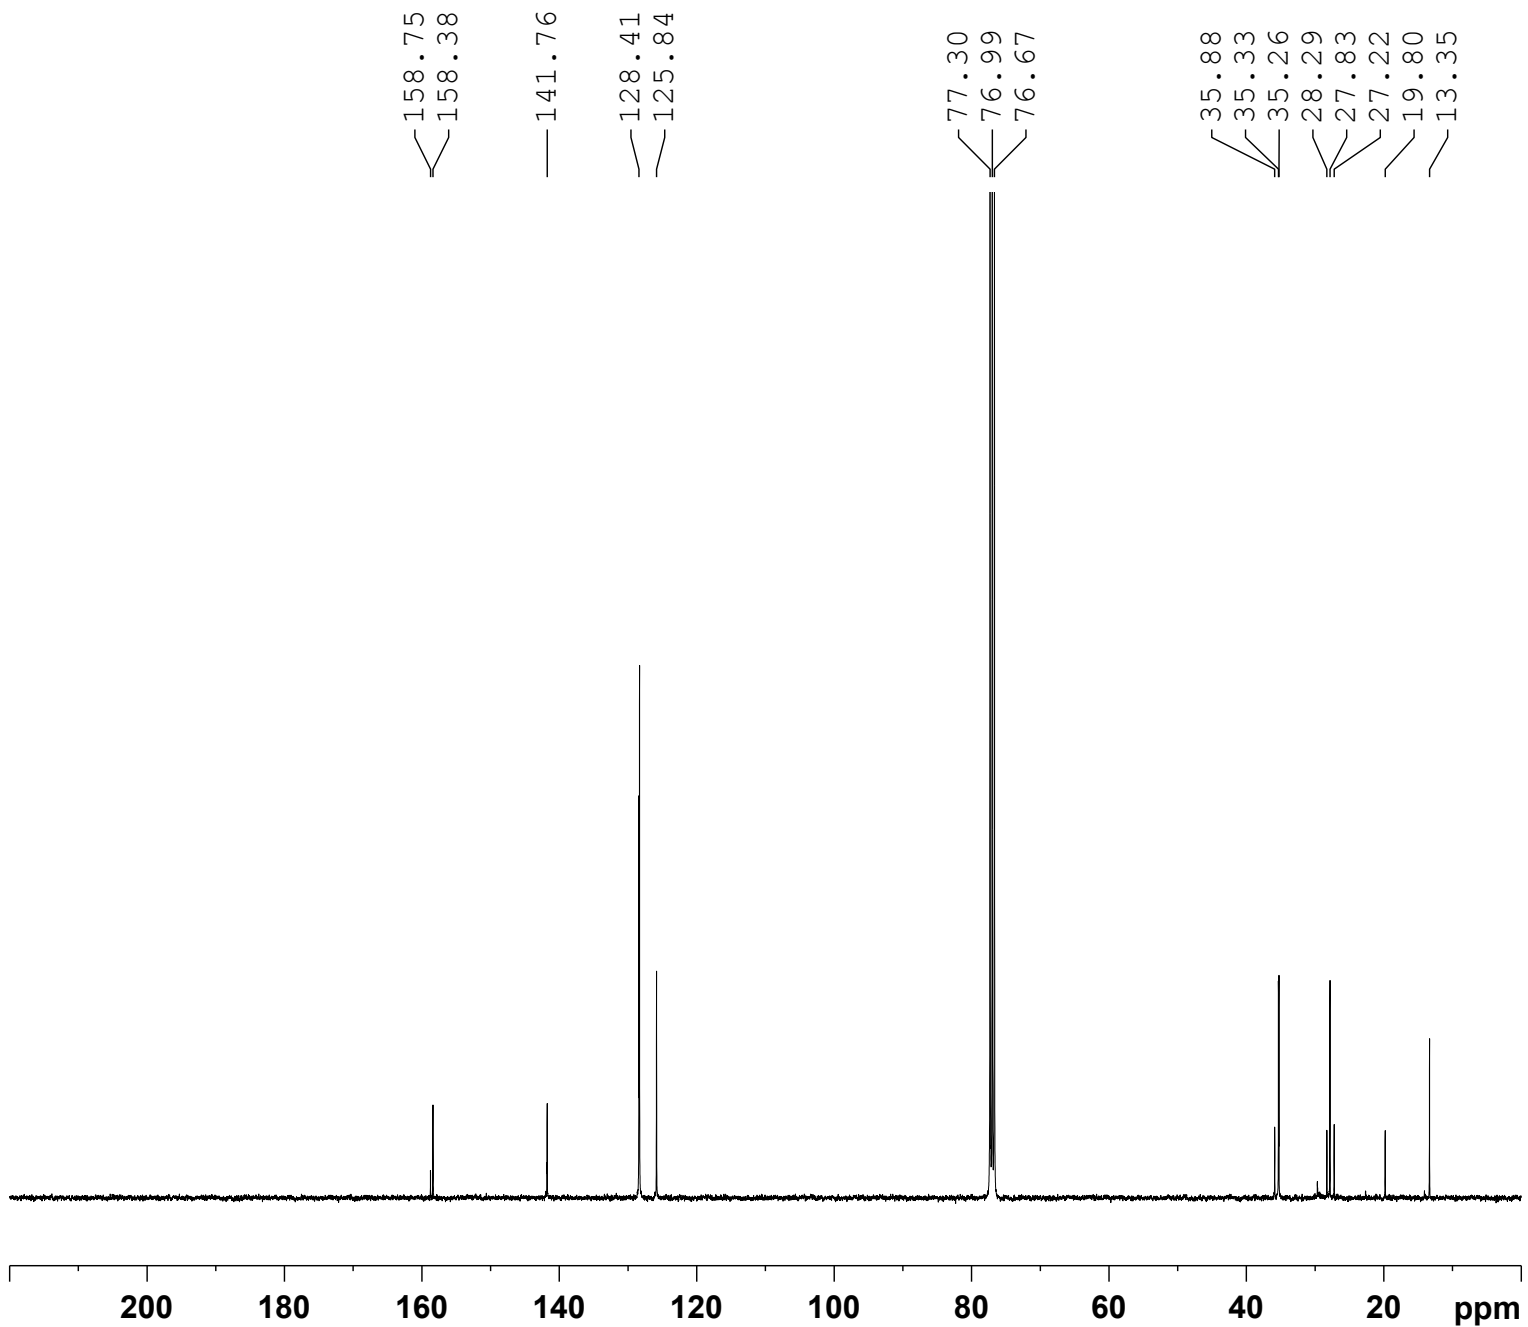

Current Data Parameters  
 NAME YYH-068  
 EXPNO 2  
 PROCNO 1

F2 - Acquisition Parameters  
 Date\_ 20210422  
 Time\_ 0.13 h  
 INSTRUM spect  
 PROBHD z108618\_0922 (  
 PULPROG zgpg30  
 TD 32768  
 SOLVENT CDCl3  
 NS 3000  
 DS 0  
 SWH 24038.461 Hz  
 FIDRES 1.467191 Hz  
 AQ 0.6815744 sec  
 RG 210.28  
 DW 20.800 usec  
 DE 6.50 usec  
 TE 297.4 K  
 D1 2.00000000 sec  
 D11 0.03000000 sec  
 TD0 1  
 SFO1 100.6233329 MHz  
 NUC1 13C  
 P1 10.50 usec  
 PLW1 44.09999847 W  
 SFO2 400.1316005 MHz  
 NUC2 1H  
 CPDPRG[2 bi\_waltz65 256  
 PCPD2 90.00 usec  
 PLW2 14.30000019 W  
 PLW12 0.37118000 W  
 PLW13 0.18640999 W

F2 - Processing parameters  
 SI 32768  
 SF 100.6127730 MHz  
 WDW EM  
 SSB 0  
 LB 2.00 Hz  
 GB 0  
 PC 1.00

DEPT of compound 2d

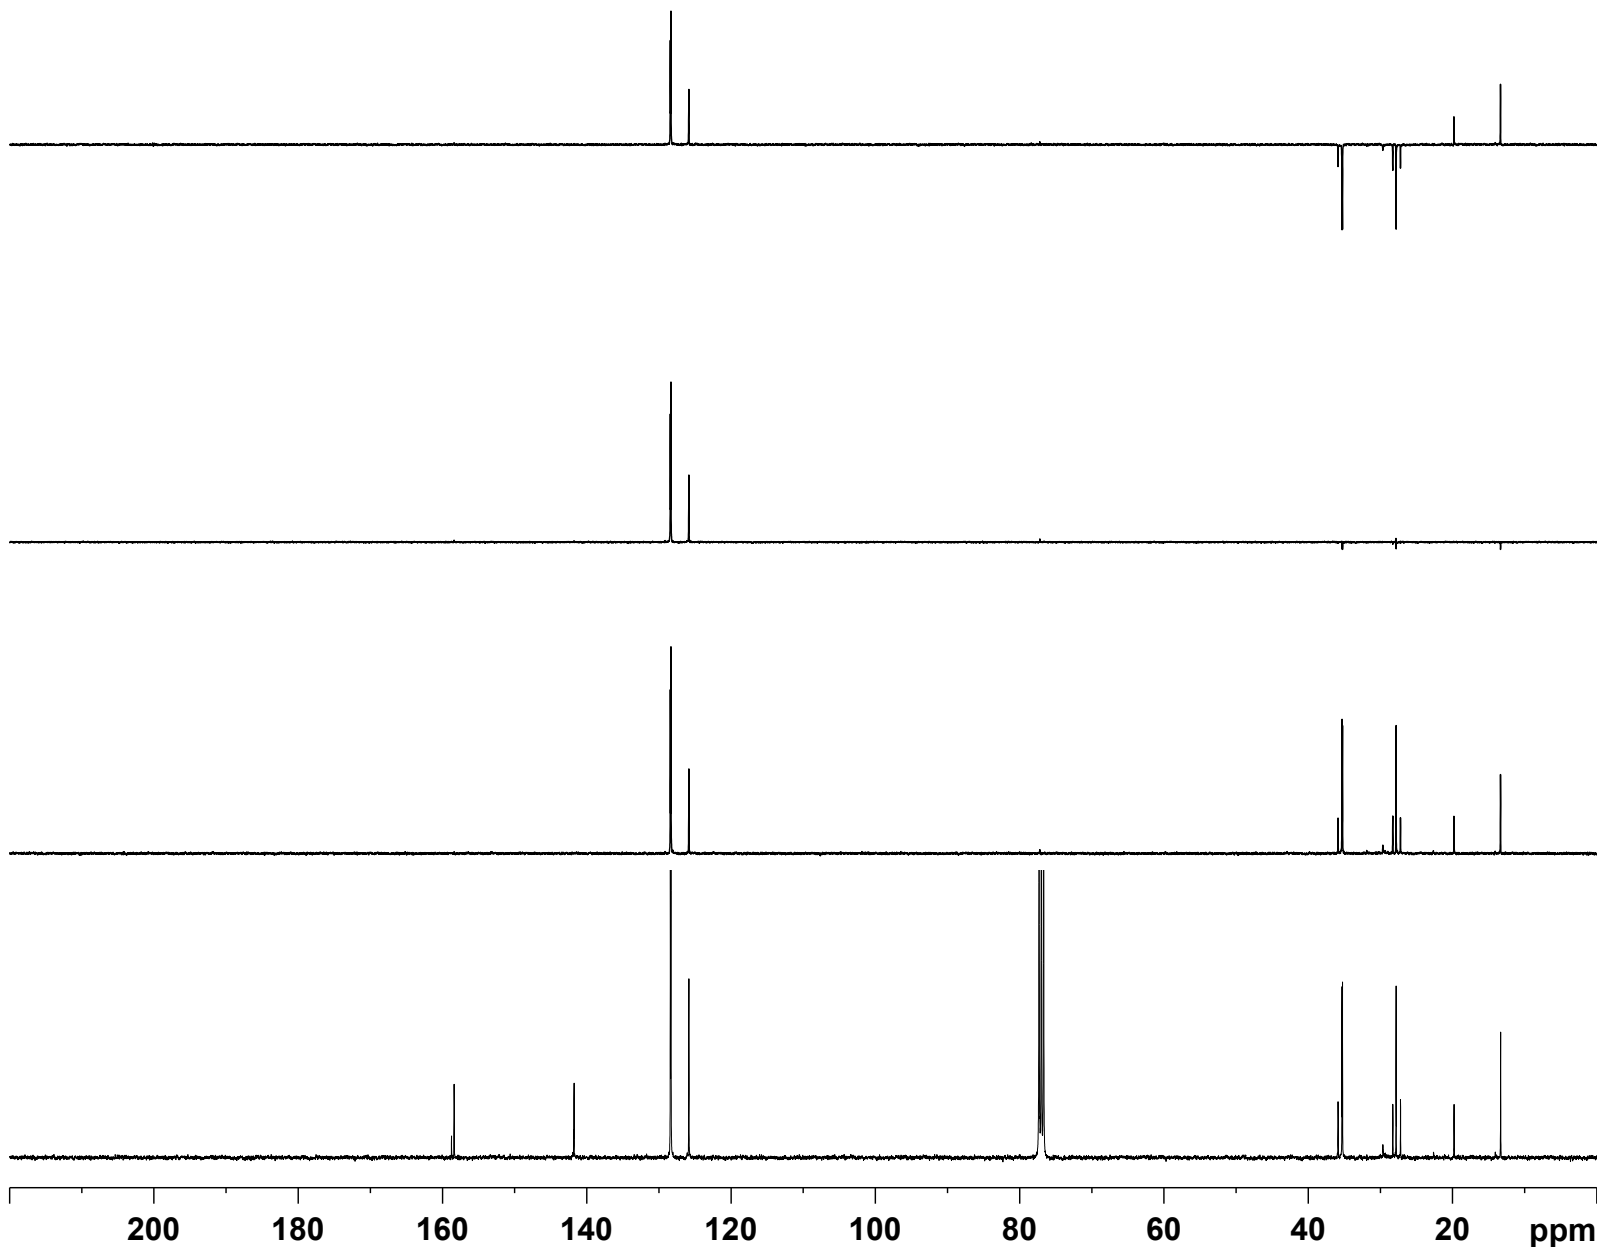

Current Data Parameters  
 NAME YYH-068  
 EXPNO 2  
 PROCNO 1

F2 - Acquisition Parameters  
 Date\_ 20210422  
 Time 0.13 h  
 INSTRUM spect  
 PROBHD Z108618\_0922 (  
 PULPROG zgpg30  
 TD 32768  
 SOLVENT CDC13  
 NS 3000  
 DS 0  
 SWH 24038.461 Hz  
 FIDRES 1.467191 Hz  
 AQ 0.6815744 sec  
 RG 210.28  
 DW 20.800 usec  
 DE 6.50 usec  
 TE 297.4 K  
 D1 2.00000000 sec  
 D11 0.03000000 sec  
 TD0 1  
 SFO1 100.6233329 MHz  
 NUC1 13C  
 P1 10.50 usec  
 PLW1 44.09999847 W  
 SFO2 400.1316005 MHz  
 NUC2 1H  
 CPDPRG[2 bi\_waltz65\_256  
 PCPD2 90.00 usec  
 PLW2 14.30000019 W  
 PLW12 0.37118000 W  
 PLW13 0.18640999 W

F2 - Processing parameters  
 SI 32768  
 SF 100.6127730 MHz  
 WDW EM  
 SSB 0  
 LB 2.00 Hz  
 GB 0  
 PC 1.00

## HSQC of compound 2d

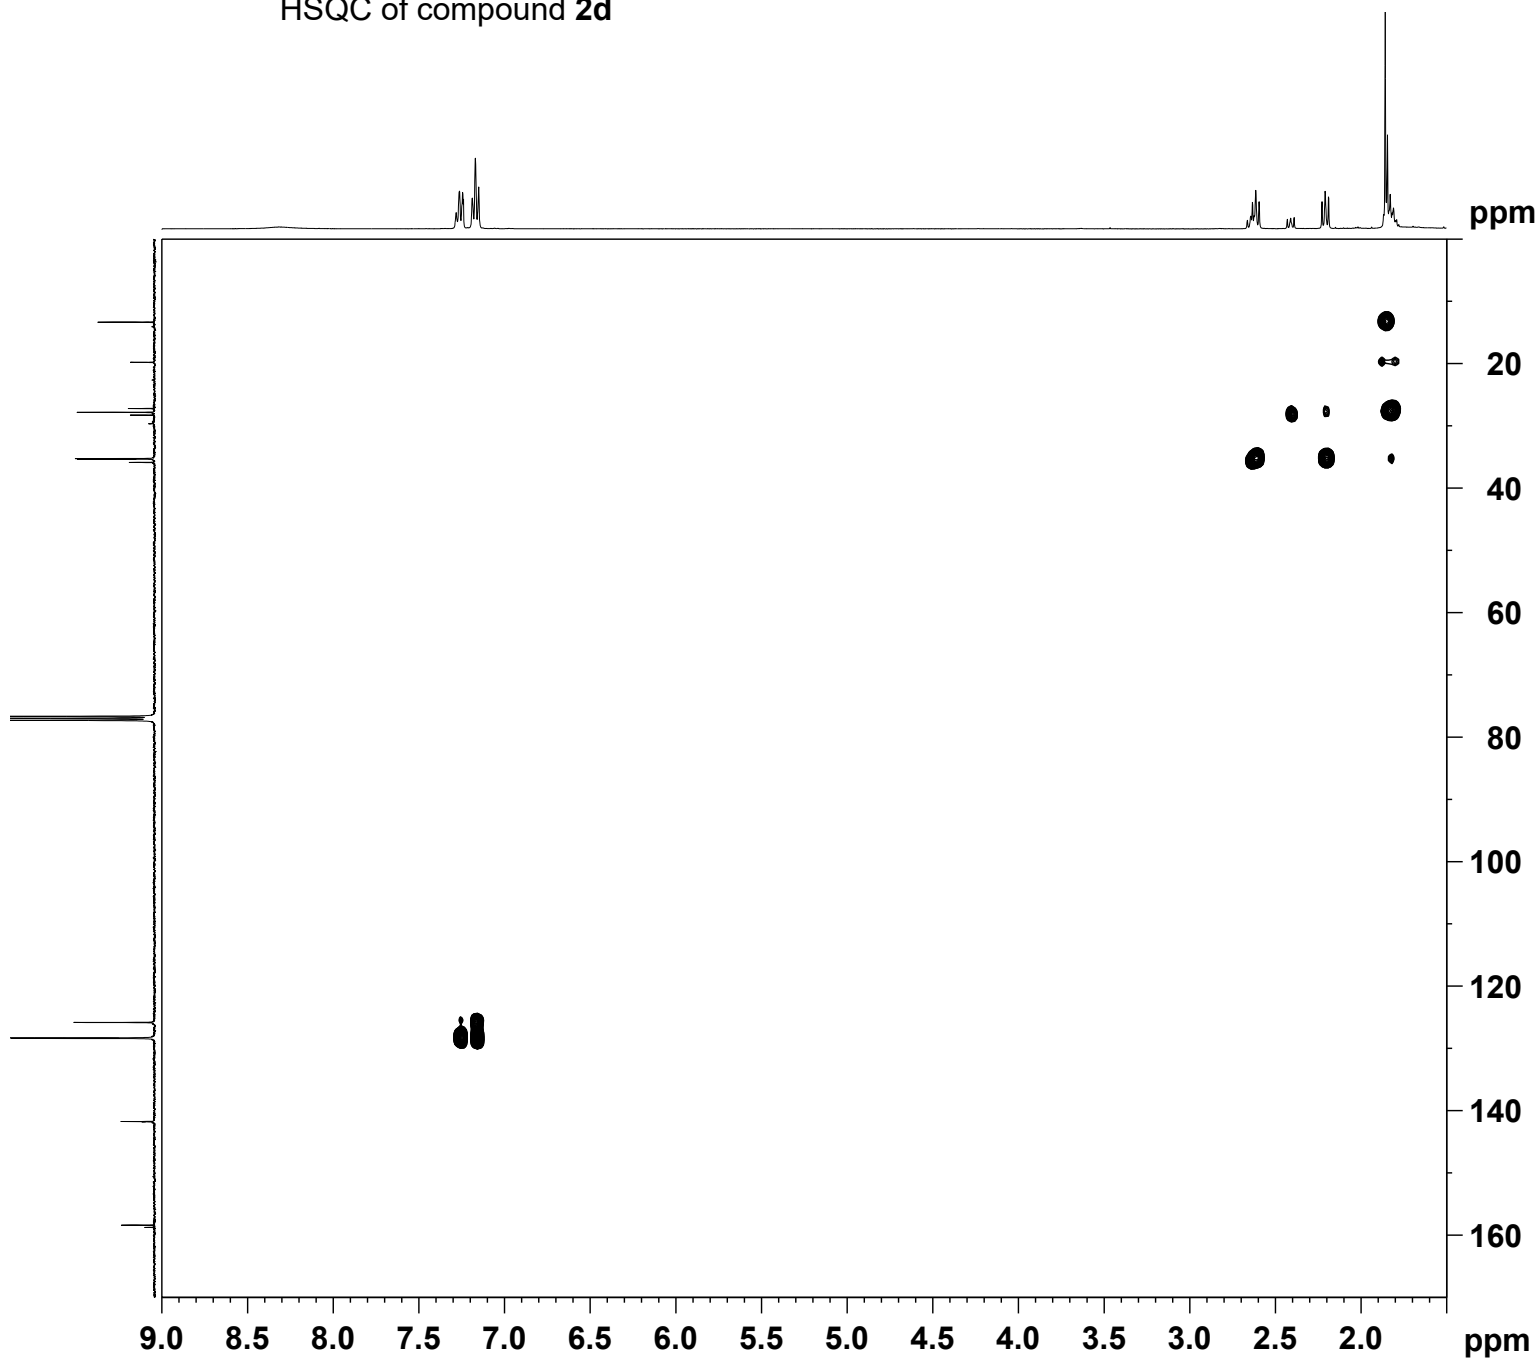

```

Current Data Parameters
NAME          YYH-068
EXPNO         6
PROCNO        1

F2 - Acquisition Parameters
Date_         20210422
Time          3.40 h
INSTRUM       spect
PROBHD        Z108618_0922 (
PULPROG       hsqcetgpsisp2.2
TD            2048
SOLVENT       CDCl3
NS            6
DS            16
SWH           8012.820 Hz
FIDRES        7.825020 Hz
AQ            0.1277952 sec
RG            210.28
DW            62.400 usec
DE            6.50 usec
TE            296.4 K
CNST2         145.0000000
CNST17        -0.5000000
D0            0.00000300 sec
D1            1.50000000 sec
D4            0.00172414 sec
D11           0.03000000 sec
D16           0.00020000 sec
D24           0.00086207 sec
IN0           0.00002080 sec
TDav          1
SFO1          400.1324008 MHz
NUC1           1H
P1            14.50 usec
P2            29.00 usec
P28           1000.00 usec
PLW1          12.69999981 W
SFO2          100.6233329 MHz
NUC2           13C
CPDPRG[2]     garp
P3            10.50 usec
P14           500.00 usec
P24           2000.00 usec
PCPD2         80.00 usec
PLW0           0 W
PLW2          44.00000000 W
PLW12         0.75796998 W
SPNAM[3]      Crp60,0.5,20.1
SFOAL3        0.500
SPOFFS3       0 Hz
SPW3          7.41179991 W
SPNAM[7]      Crp60comp.4
SFOAL7        0.500
SPOFFS7       0 Hz
SPW7          7.41179991 W
GPNAM[1]      SMSQ10.100
GPZ1          80.00 %
GPNAM[2]      SMSQ10.100
GPZ2          20.10 %
GPNAM[3]      SMSQ10.100
GPZ3          11.00 %
GPNAM[4]      SMSQ10.100
GPZ4          -5.00 %
P16           1000.00 usec
P19           600.00 usec

F1 - Acquisition parameters
TD            256
SFO1          100.6233 MHz
FIDRES        187.800476 Hz
SW            238.896 ppm
FnMODE        Echo-Antiecho

F2 - Processing parameters
SI            1024
SF            400.1300179 MHz
WDW           QSINE
SSB           2
LB            0 Hz
GB            0
PC            1.40

F1 - Processing parameters
SI            1024
MC2           echo-antiecho
SF            100.6127730 MHz
WDW           QSINE
SSB           2
LB            0 Hz
GB            0

```

## COSY of compound 2d

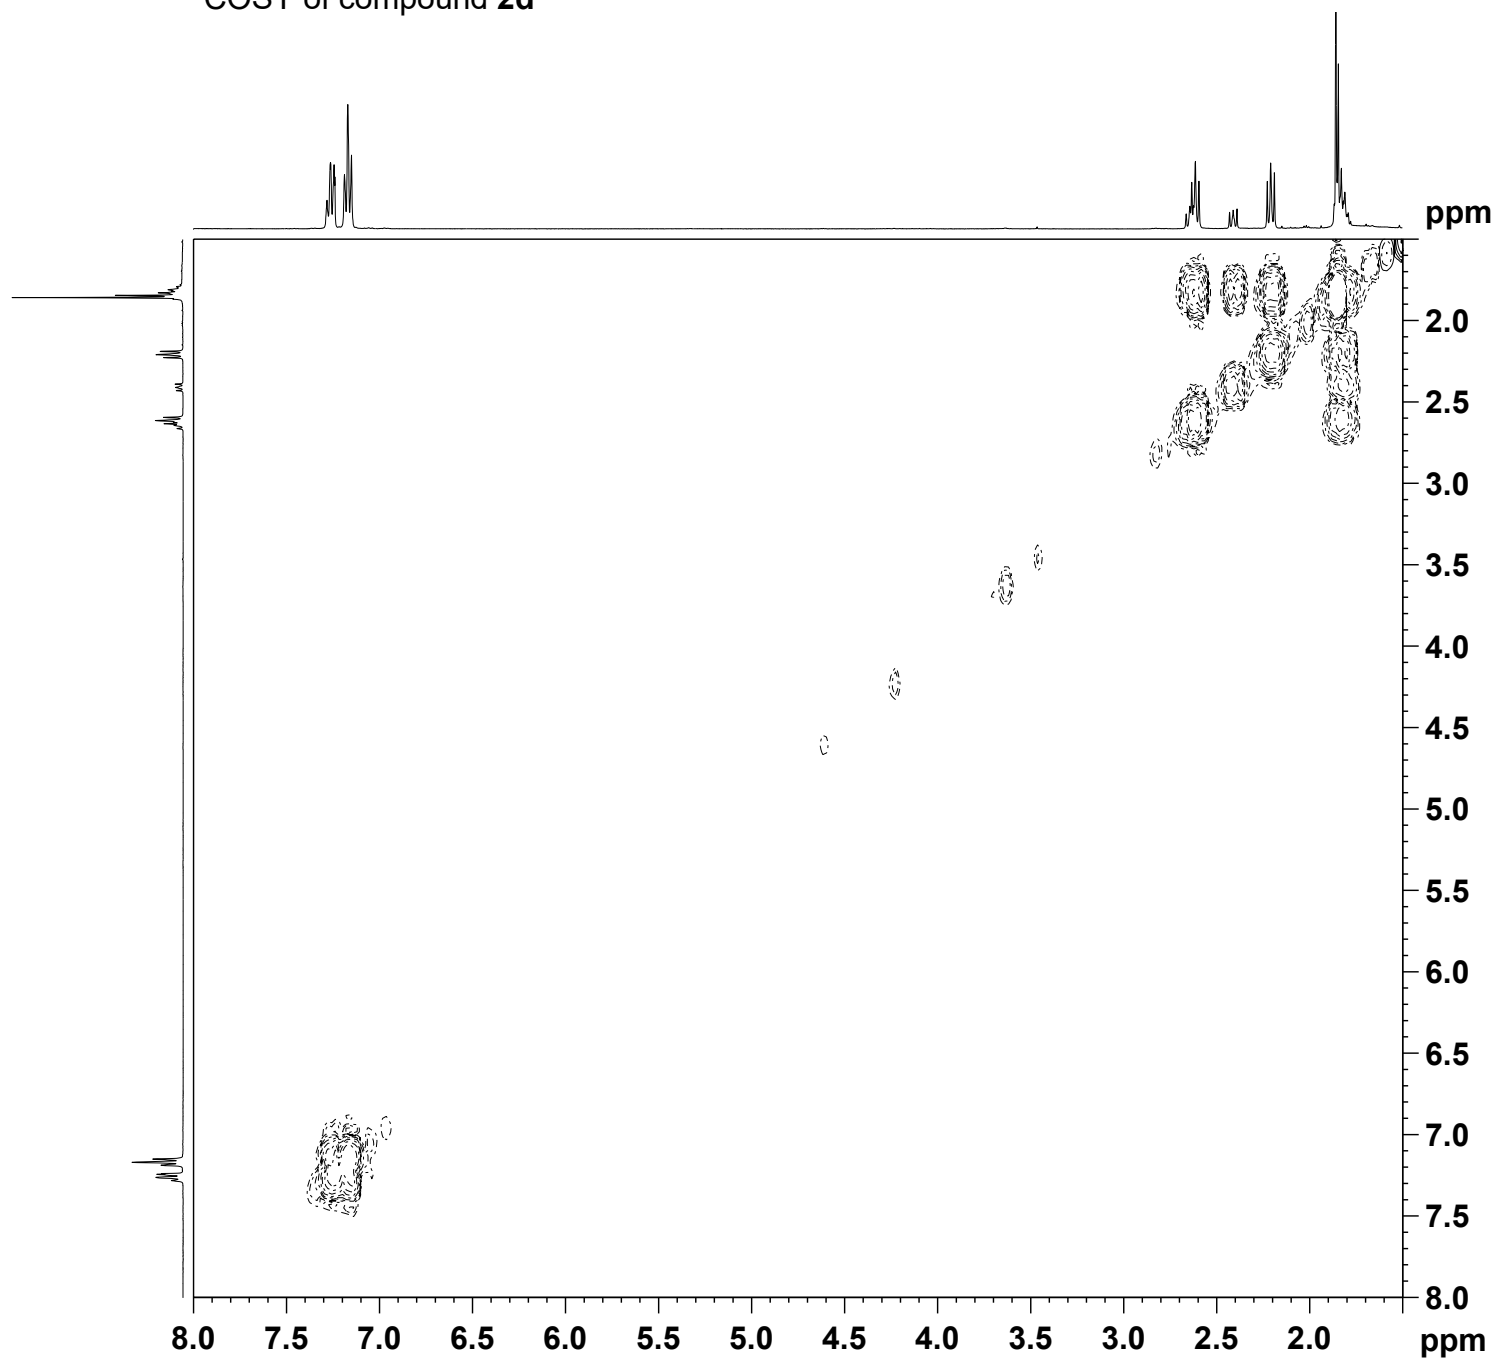

Current Data Parameters  
 NAME YYH-068  
 EXPNO 7  
 PROCNO 1

## F2 - Acquisition Parameters

Date\_ 20210422  
 Time\_ 4.23 h  
 INSTRUM spect  
 PROBHD Z108618\_0922 ( )  
 PULPROG cosygpppqf  
 TD 2048  
 SOLVENT CDCl3  
 NS 6  
 DS 16  
 SWH 8012.820 Hz  
 FIDRES 7.825020 Hz  
 AQ 0.1277952 sec  
 RG 210.28  
 DW 62.400 usec  
 DE 6.50 usec  
 TE 296.4 K  
 D0 0.00000300 sec  
 D1 2.00000000 sec  
 D11 0.03000000 sec  
 D12 0.00002000 sec  
 D13 0.00000400 sec  
 D16 0.00020000 sec  
 IN0 0.00012480 sec  
 T Dav 1  
 SFO1 400.1324008 MHz  
 NUC1 1H  
 P0 14.50 usec  
 P1 14.50 usec  
 P17 2500.00 usec  
 PLW1 12.69999981 W  
 PLW10 2.96690011 W  
 GPNAM[1] SMSQ10.100  
 GPZ1 10.00 %  
 P16 1000.00 usec

## F1 - Acquisition parameters

TD 256  
 SFO1 400.1324 MHz  
 FIDRES 62.600159 Hz  
 SW 20.025 ppm  
 FnmODE QF

## F2 - Processing parameters

SI 1024  
 SF 400.1300179 MHz  
 WDW QSINE  
 SSB 0  
 LB 0 Hz  
 GB 0  
 PC 1.40

## F1 - Processing parameters

SI 1024  
 MC2 QF  
 SF 400.1300179 MHz  
 WDW QSINE  
 SSB 0  
 LB 0 Hz  
 GB 0

## NOESY of compound 2d

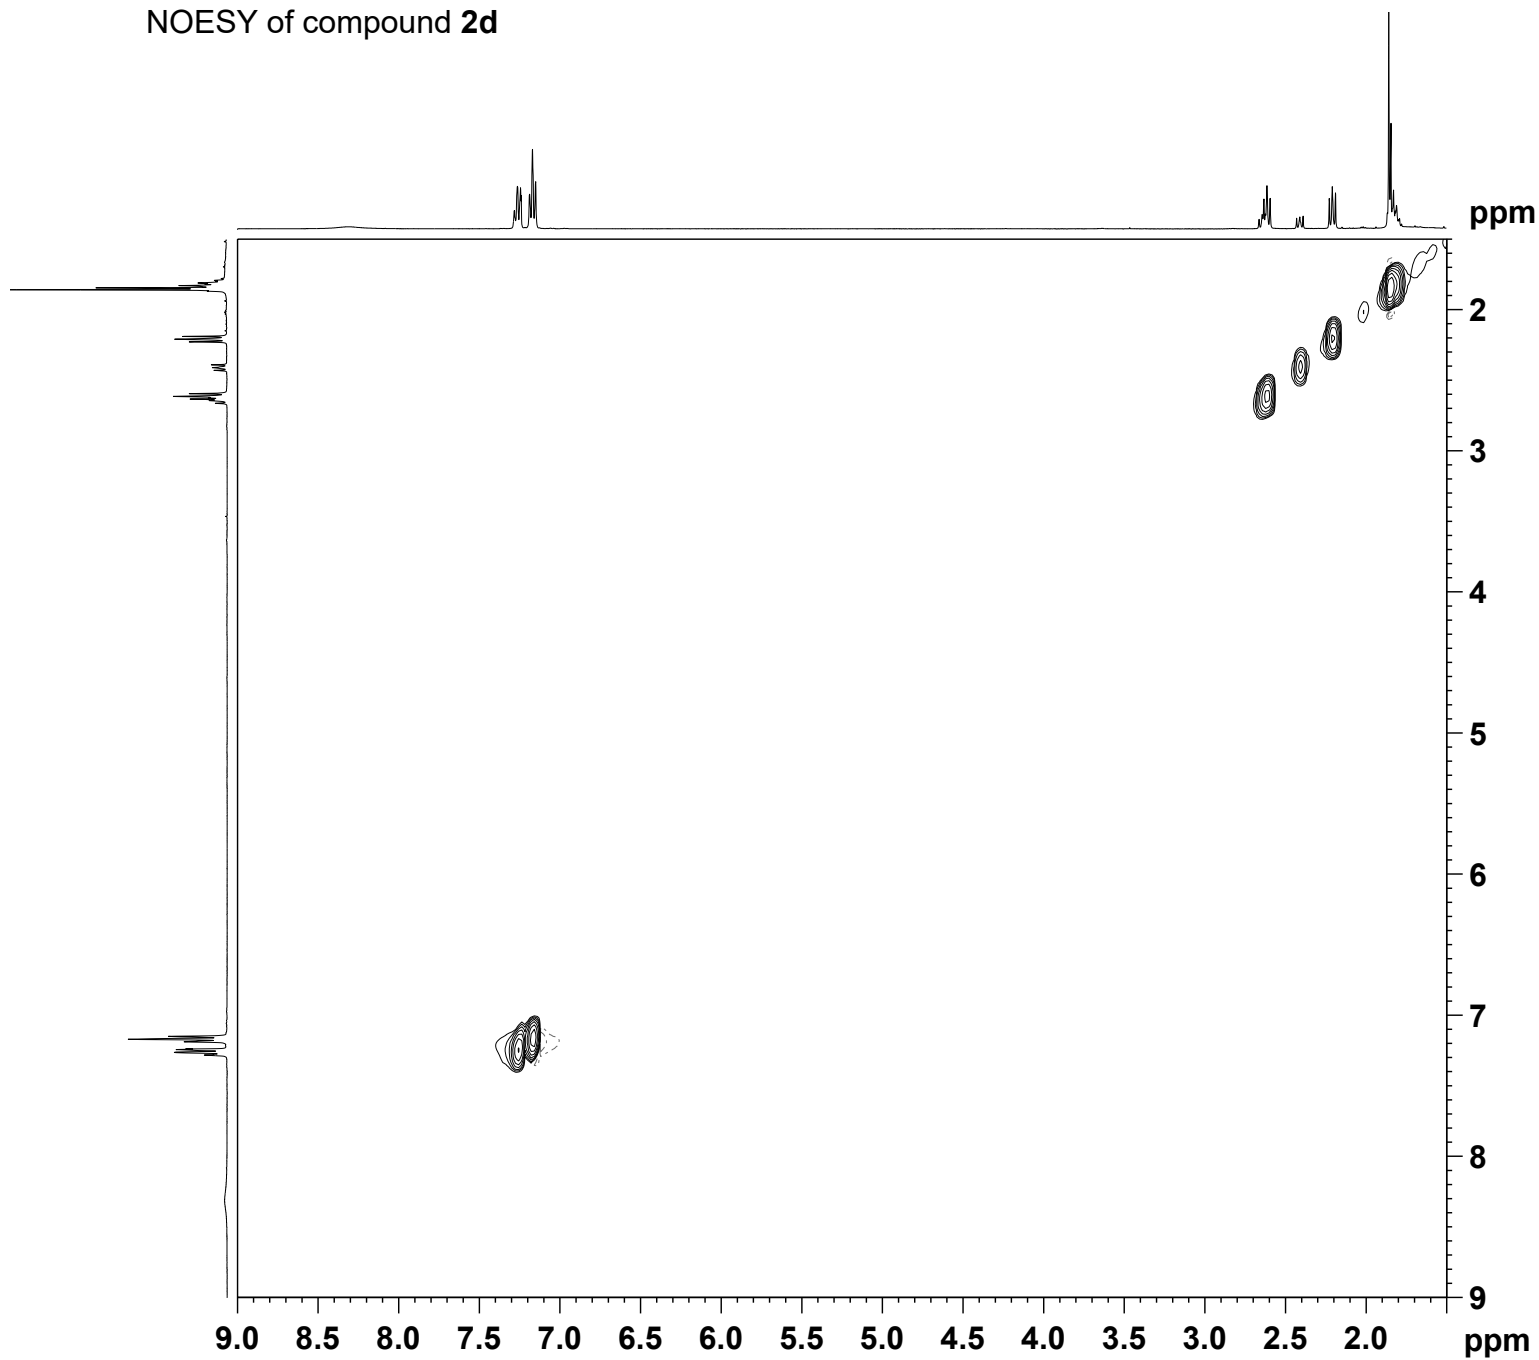

```

Current Data Parameters
NAME          YYH-068
EXPNO         8
PROCNO        1

F2 - Acquisition Parameters
Date_         20210422
Time          5.20 h
INSTRUM       spect
PROBHD        Z108618_0922 (
PULPROG       noesygpphpp
TD            2048
SOLVENT       CDCl3
NS            6
DS            16
SWH           8012.820 Hz
FIDRES        7.825020 Hz
AQ            0.1277952 sec
RG            112.98
DW            62.400 usec
DE            6.50 usec
TE            295.8 K
D0            0.00004394 sec
D1            2.00000000 sec
D8            0.40000001 sec
D11           0.03000000 sec
D12           0.00002000 sec
D16           0.00020000 sec
IN0           0.00012480 sec
TDav          1
SFO1          400.1324008 MHz
NUC1          1H
P1            14.50 usec
P2            29.00 usec
P17           2500.00 usec
PLW1          12.69999981 W
PLW10         2.96690011 W
GPNAM[1]      SMSQ10.100
GPZ1          40.00 %
P16           1000.00 usec

F1 - Acquisition parameters
TD            256
SFO1          400.1324 MHz
FIDRES        62.600159 Hz
SW            20.025 ppm
FnMODE        States-TPPI

F2 - Processing parameters
SI            1024
SF            400.1300179 MHz
WDW           QSINE
SSB           2
LB            0 Hz
GB            0
PC            1.40

F1 - Processing parameters
SI            1024
MC2           States-TPPI
SF            400.1300179 MHz
WDW           QSINE
SSB           2
LB            0 Hz
GB            0

```

1H NMR (CDCl3, 400 MHz) of compound 2e

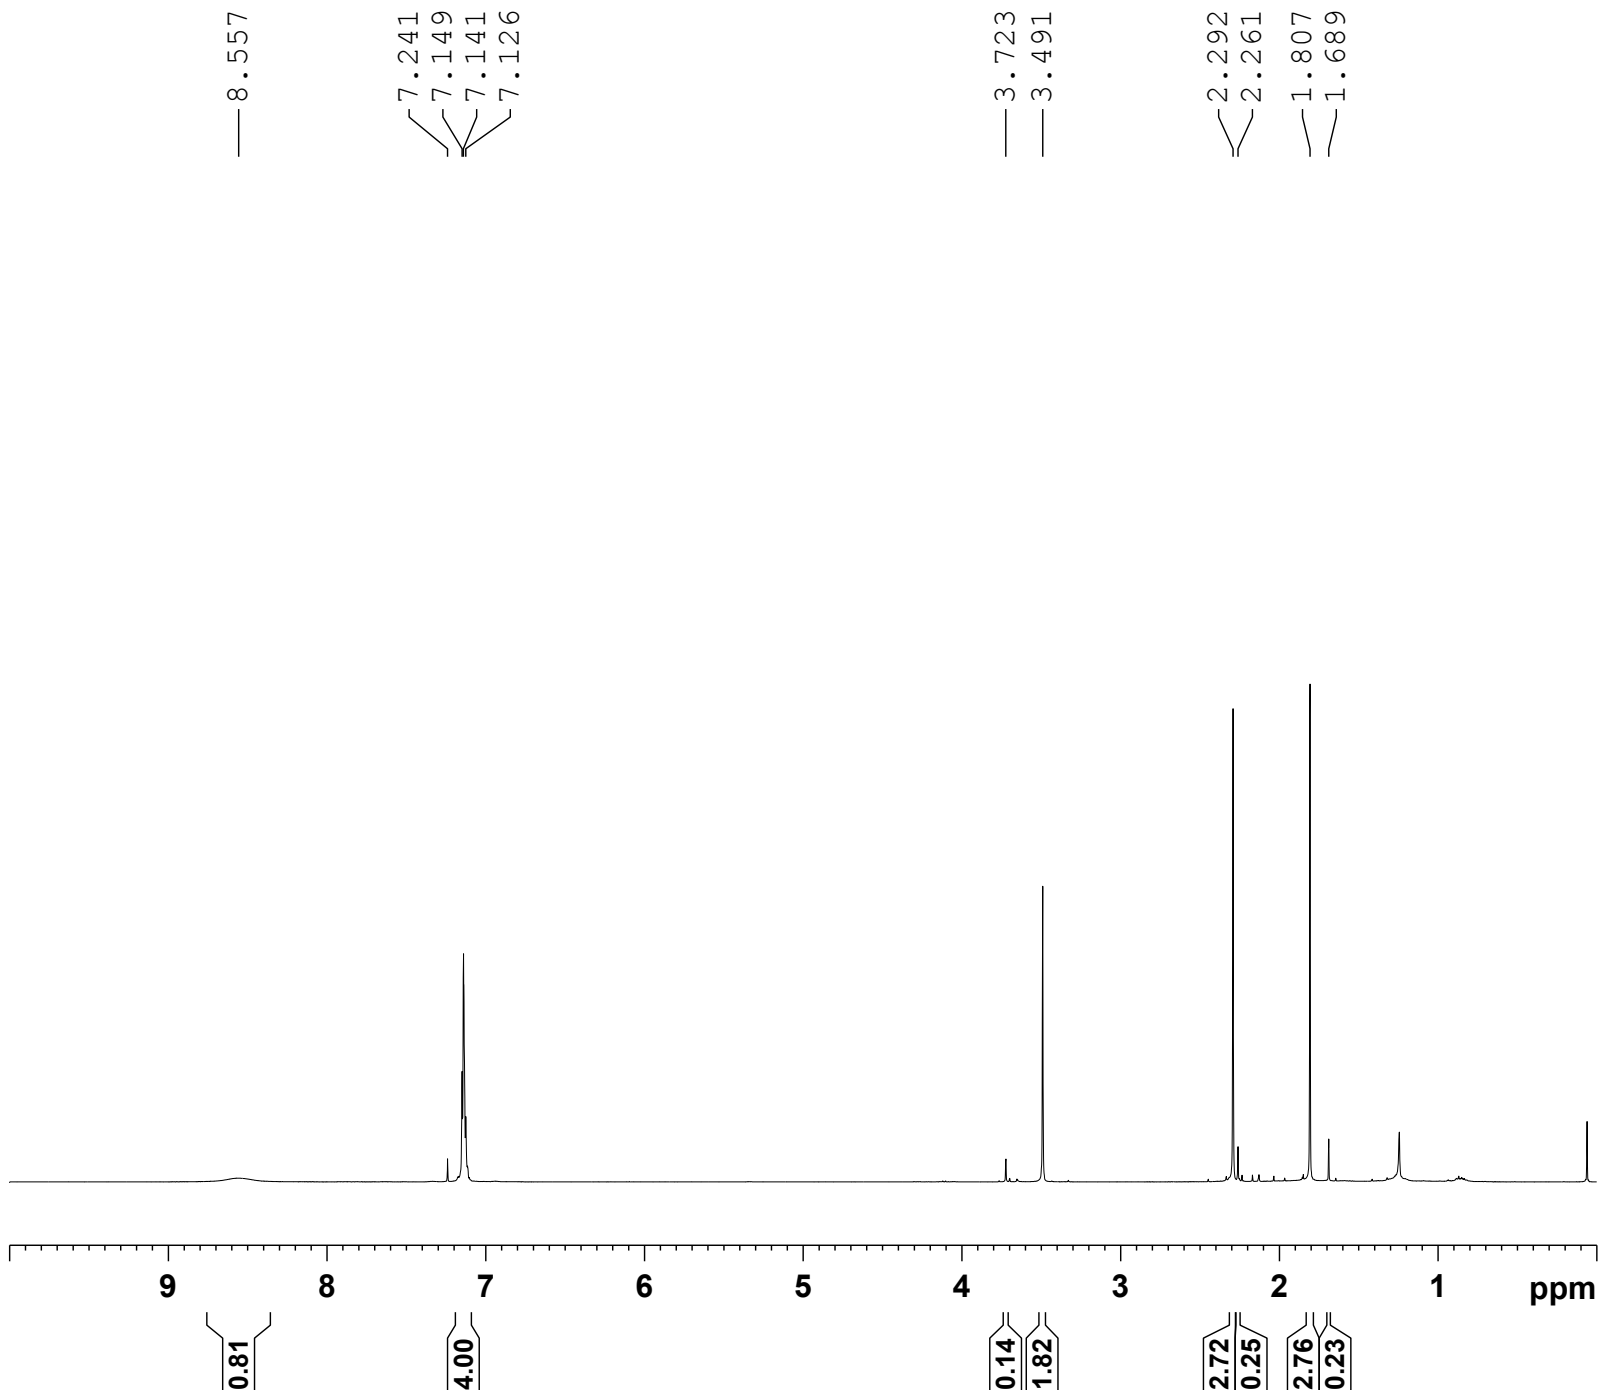

Current Data Parameters  
 NAME YYH-074  
 EXPNO 1  
 PROCNO 1

F2 - Acquisition Parameters  
 Date\_ 20210420  
 Time\_ 12.06 h  
 INSTRUM spect  
 PROBHD z108618\_0922 (  
 PULPROG zg30  
 TD 32768  
 SOLVENT CDCl3  
 NS 16  
 DS 0  
 SWH 8012.820 Hz  
 FIDRES 0.489064 Hz  
 AQ 2.0447233 sec  
 RG 128.5  
 DW 62.400 usec  
 DE 16.43 usec  
 TE 296.0 K  
 D1 2.00000000 sec  
 TD0 1  
 SFO1 400.1324008 MHz  
 NUC1 1H  
 P1 14.50 usec  
 PLW1 12.69999981 W

F2 - Processing parameters  
 SI 16384  
 SF 400.1300173 MHz  
 WDW EM  
 SSB 0  
 LB 0 Hz  
 GB 0  
 PC 1.00



<sup>13</sup>C NMR (CDCl<sub>3</sub>, 100 MHz) of compound **2e**

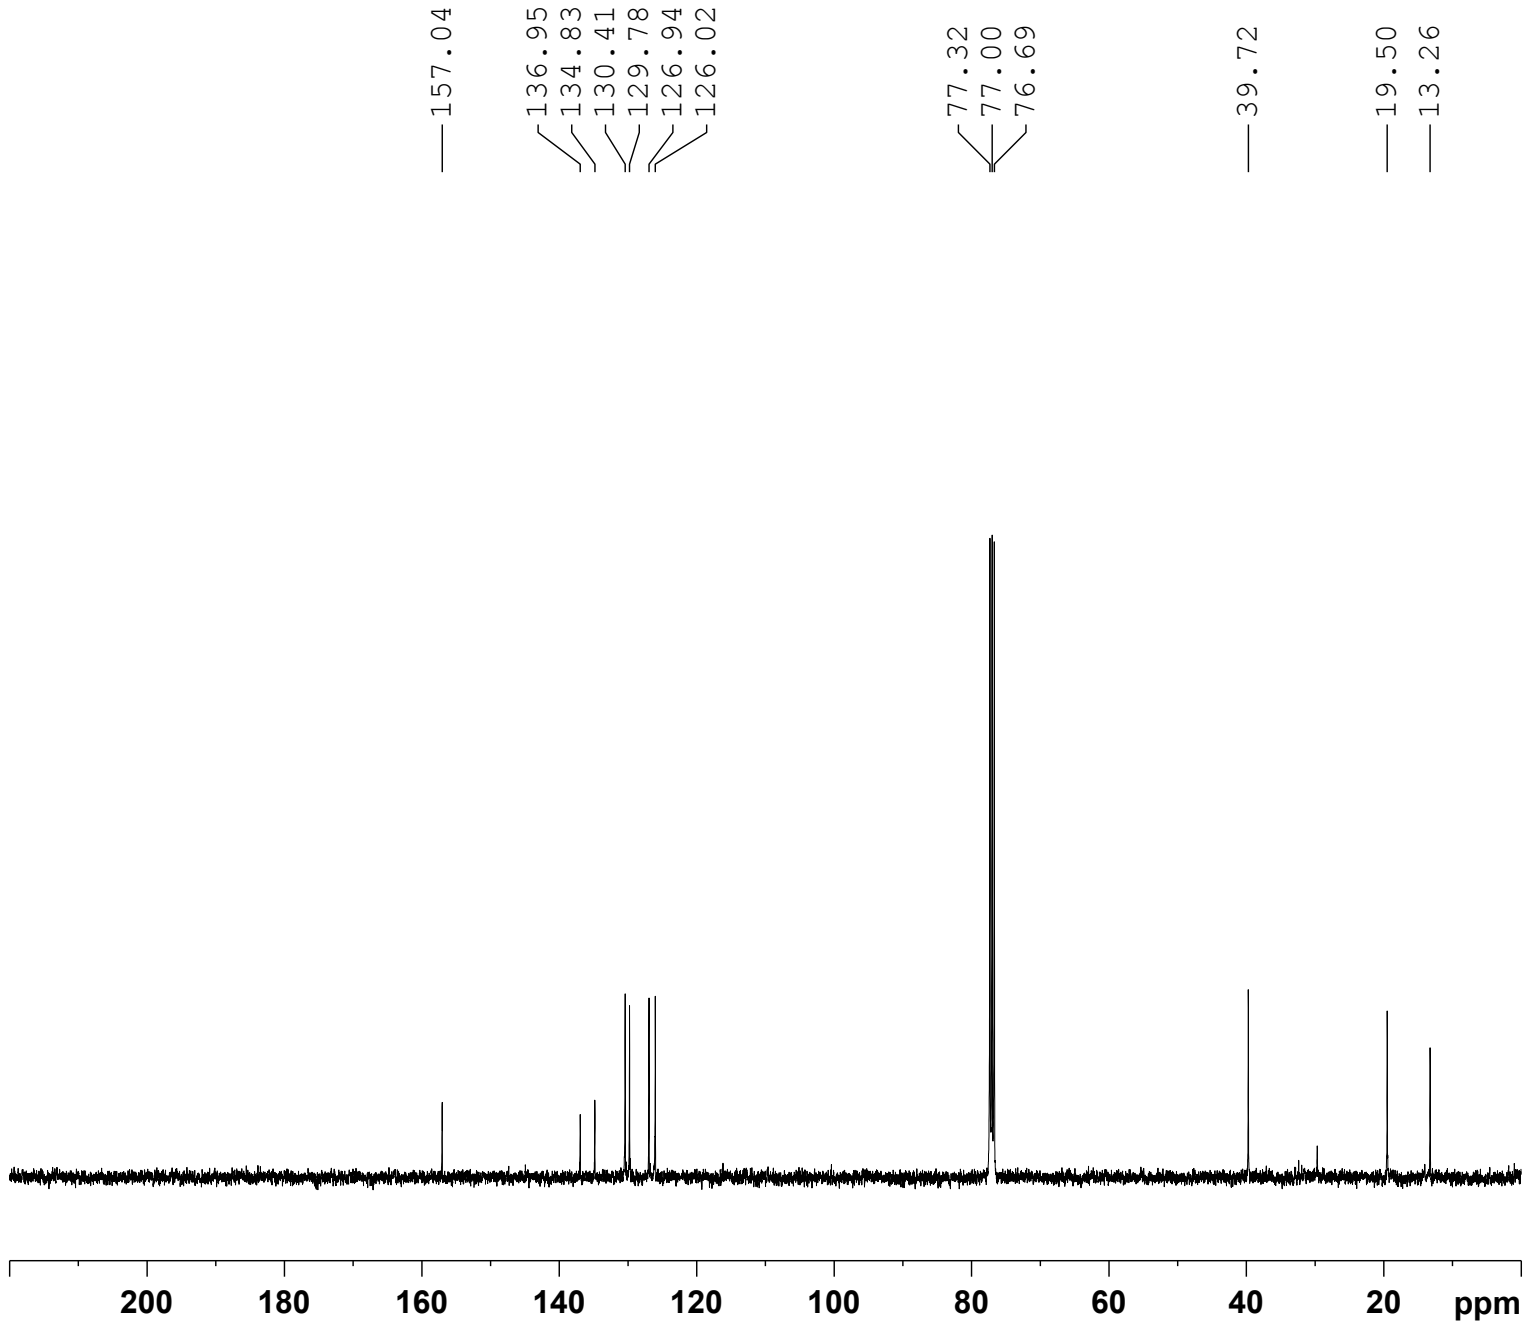

```

Current Data Parameters
NAME          YYH-074
EXPNO         2
PROCNO        1

F2 - Acquisition Parameters
Date_         20210420
Time_         21.52 h
INSTRUM       spect
PROBHD        z108618_0922 (
PULPROG       zgpg30
TD            32768
SOLVENT       CDC13
NS            200
DS            0
SWH           24038.461 Hz
FIDRES        1.467191 Hz
AQ            0.6815744 sec
RG            210.28
DW            20.800 usec
DE            6.50 usec
TE            296.7 K
D1            2.00000000 sec
D11           0.03000000 sec
TD0           1
SFO1          100.6233329 MHz
NUC1          13C
P1            10.50 usec
PLW1          44.09999847 W
SFO2          400.1316005 MHz
NUC2          1H
CPDPRG[2]    bi_waltz65_256
PCPD2         90.00 usec
PLW2          14.30000019 W
PLW12         0.37118000 W
PLW13         0.18640999 W

F2 - Processing parameters
SI            32768
SF            100.6127729 MHz
WDW           EM
SSB           0
LB            2.00 Hz
GB            0
PC            1.00
    
```

DEPT of compound 2e

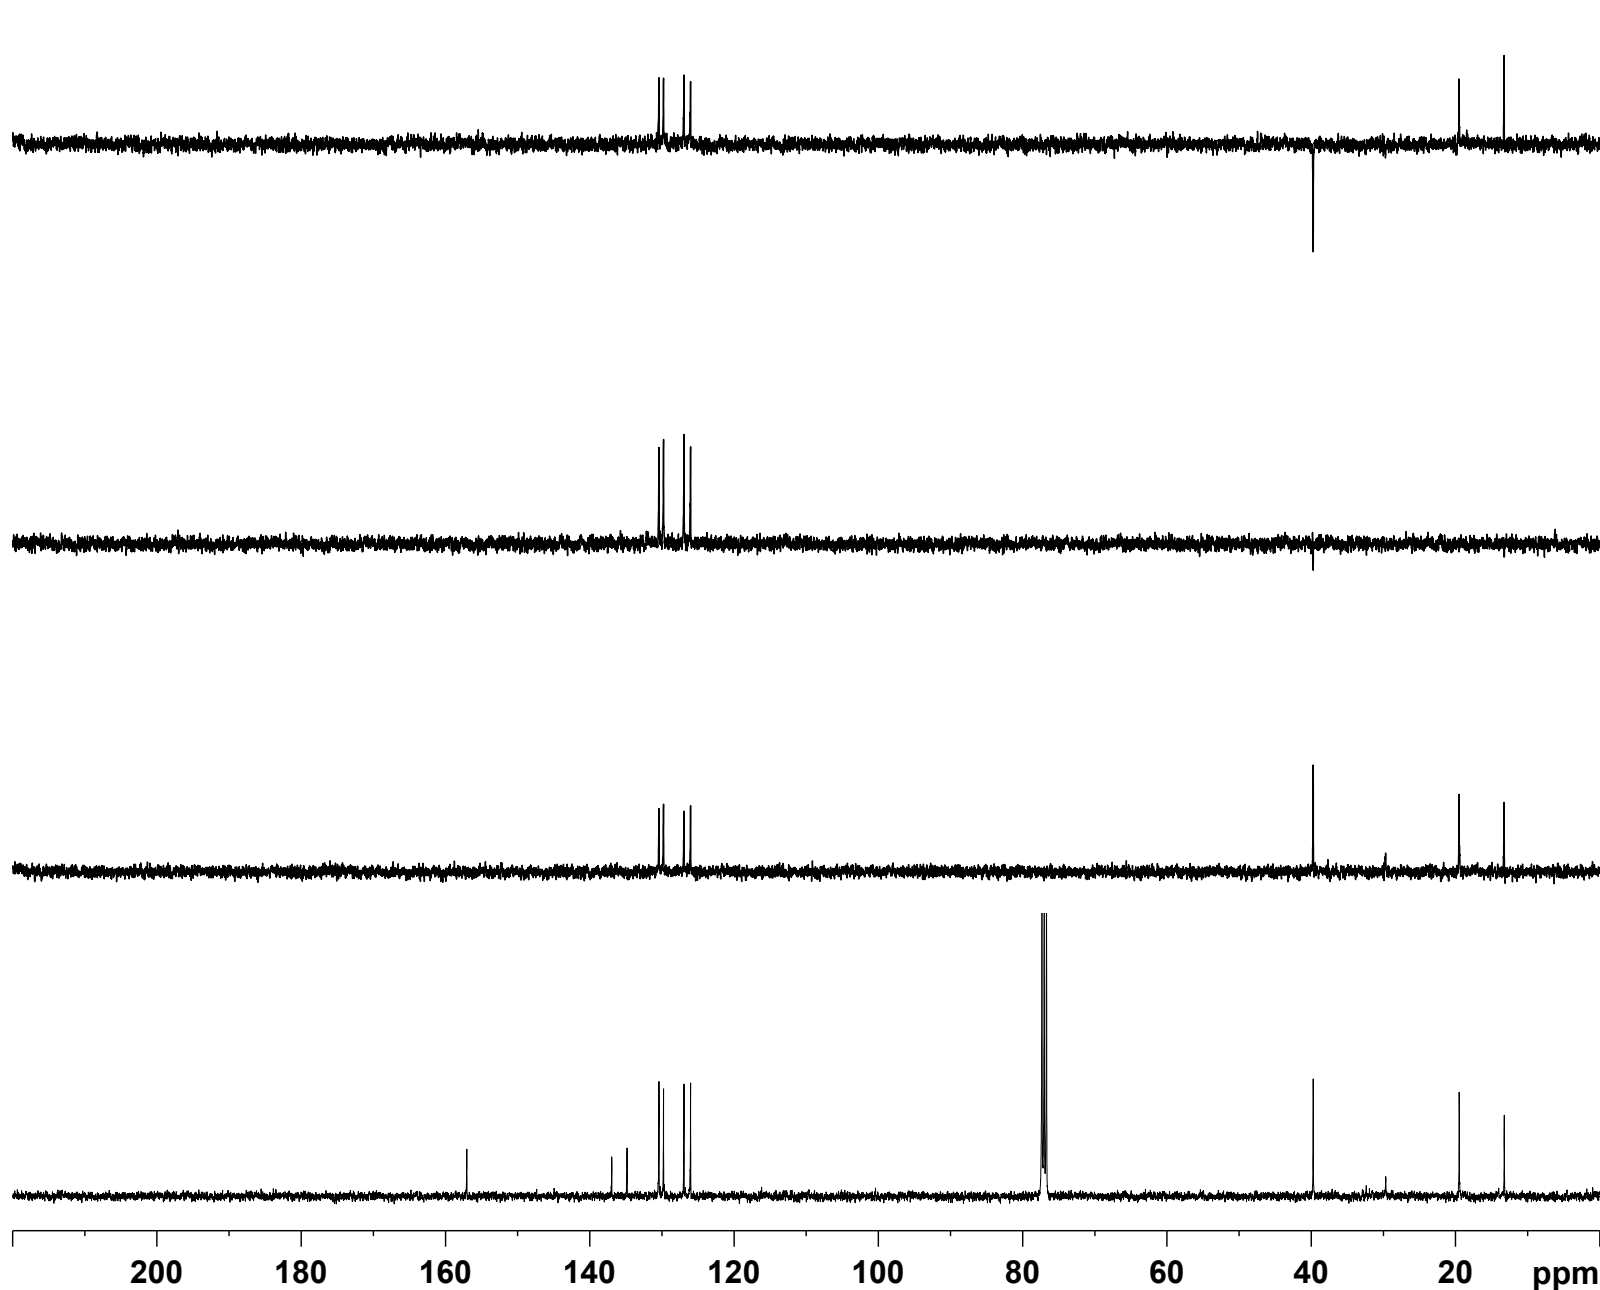

```

Current Data Parameters
NAME                YYH-074
EXPNO                2
PROCNO              1

F2 - Acquisition Parameters
Date_                20210420
Time                 21.52 h
INSTRUM              spect
PROBHD               Z108618_0922 (
PULPROG              zgpg30
TD                   32768
SOLVENT              CDC13
NS                   200
DS                   0
SWH                  24038.461 Hz
FIDRES               1.467191 Hz
AQ                   0.6815744 sec
RG                   210.28
DW                   20.800 usec
DE                   6.50 usec
TE                   296.7 K
D1                   2.00000000 sec
D11                  0.03000000 sec
TD0                  1
SFO1                 100.6233329 MHz
NUC1                 13C
P1                   10.50 usec
PLW1                 44.09999847 W
SFO2                 400.1316005 MHz
NUC2                 1H
CPDPRG[2]            bi_waltz65_256
PCPD2                90.00 usec
PLW2                 14.30000019 W
PLW12                0.37118000 W
PLW13                0.18640999 W

F2 - Processing parameters
SI                   32768
SF                   100.6127729 MHz
WDW                  EM
SSB                  0
LB                   2.00 Hz
GB                   0
PC                   1.00
    
```

HSQC of compound 2e

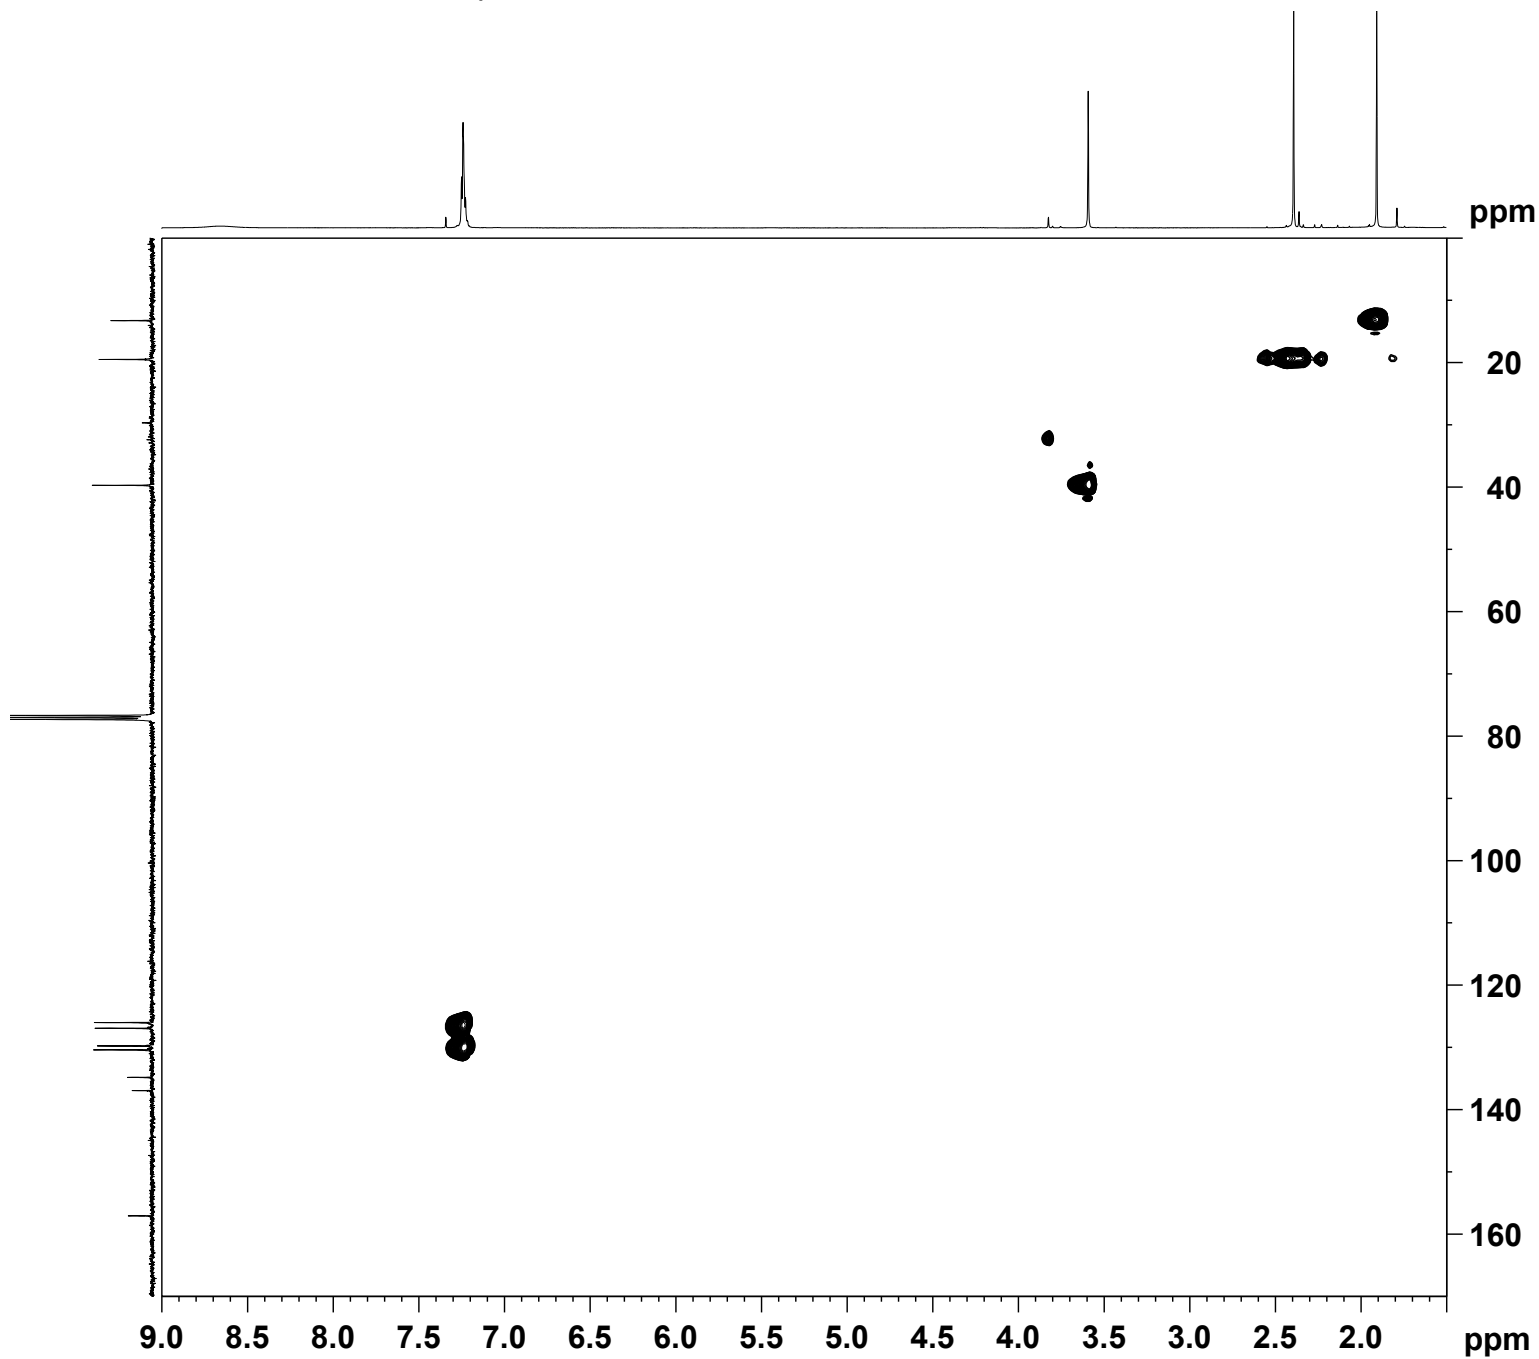

```

Current Data Parameters
NAME      YYH-074
EXPNO    6
PROCNO   1

F2 - Acquisition Parameters
Date_    20210420
Time     19.55 h
INSTRUM  spect
PROBHD   Z108618_0922 (
PULPROG  hsqcetgpsi2.2
TD       2048
SOLVENT  CDCl3
NS       4
DS       16
SWH      8012.820 Hz
FIDRES   7.825020 Hz
AQ       0.1277952 sec
RG       210.28
DW       62.400 usec
DE       6.50 usec
TE       296.4 K
CNST2    145.0000000
CNST17   -0.5000000
D0       0.00000300 sec
D1       1.50000000 sec
D4       0.00172414 sec
D11      0.03000000 sec
D16      0.00020000 sec
D24      0.00086207 sec
IN0      0.00002080 sec
TDav     1
SFO1     400.1324008 MHz
NUC1     1H
P1       14.50 usec
P2       29.00 usec
P28      1000.00 usec
PLW1     12.69999981 W
SFO2     100.6233329 MHz
NUC2     13C
CPDPRG[2] garp
P3       10.50 usec
P14      500.00 usec
P24      2000.00 usec
PCPD2    80.00 usec
PLW0     0 W
PLW2     44.00000000 W
PLW12    0.75796998 W
SPNAM[3] Crp60,0.5,20.1
SFOAL3   0.500
SPOFFS3  0 Hz
SPW3     7.41179991 W
SPNAM[7] Crp60comp.4
SFOAL7   0.500
SPOFFS7  0 Hz
SPW7     7.41179991 W
GPNAM[1] SMSQ10.100
GP21     80.00 %
GPNAM[2] SMSQ10.100
GP22     20.10 %
GPNAM[3] SMSQ10.100
GP23     11.00 %
GPNAM[4] SMSQ10.100
GP24     -5.00 %
P16      1000.00 usec
P19      600.00 usec

F1 - Acquisition parameters
TD       256
SFO1     100.6233 MHz
FIDRES   187.800476 Hz
SW       238.896 ppm
FnMODE   Echo-Antiecho

F2 - Processing parameters
SI       1024
SF       400.1299767 MHz
WDW      QSINE
SSB      2
LB       0 Hz
GB       0
PC       1.40

F1 - Processing parameters
SI       1024
MC2      echo-antiecho
SF       100.6127729 MHz
WDW      QSINE
SSB      2
LB       0 Hz
GB       0
    
```

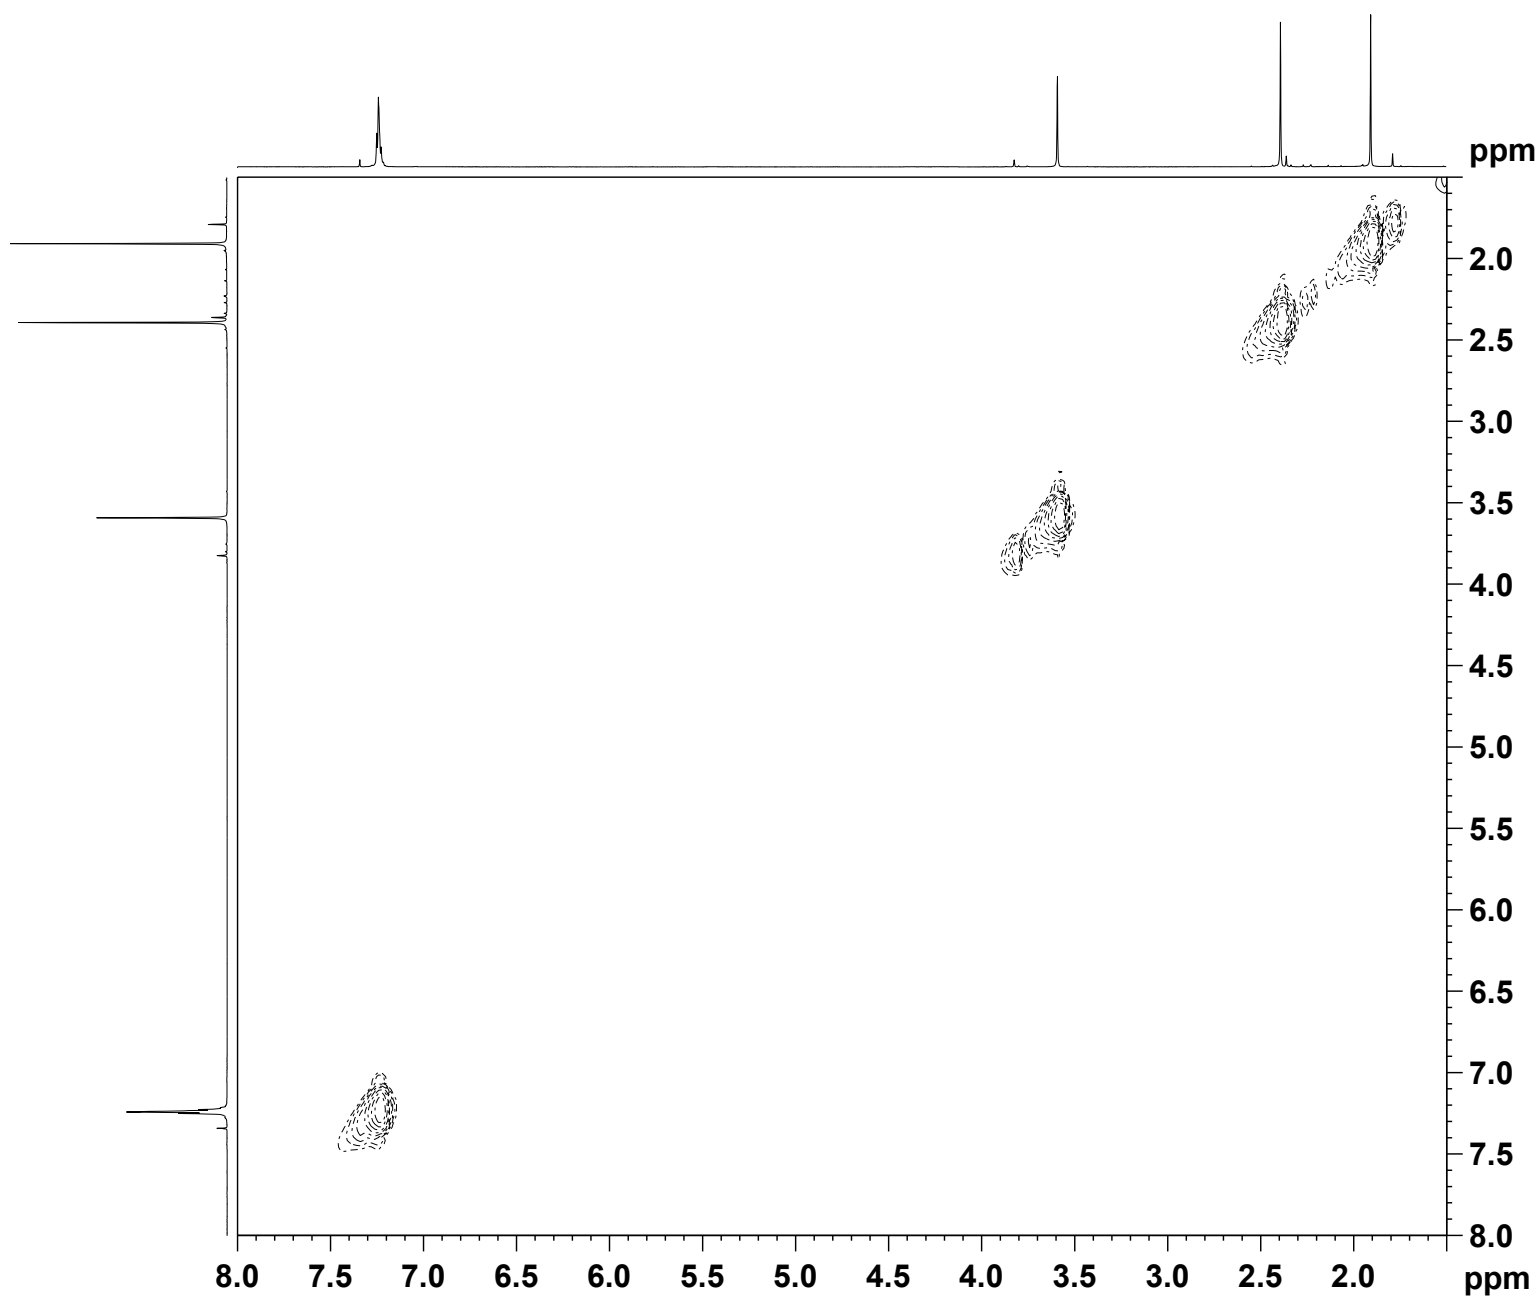

```

Current Data Parameters
NAME          YYH-074
EXPNO         7
PROCNO        1

F2 - Acquisition Parameters
Date_         20210420
Time          20.24 h
INSTRUM       spect
PROBHD        Z108618 0922 (
PULPROG       cosygppppqf
TD            2048
SOLVENT       CDCl3
NS            4
DS            16
SWH           8012.820 Hz
FIDRES        7.825020 Hz
AQ            0.1277952 sec
RG            210.28
DW            62.400 usec
DE            6.50 usec
TE            296.3 K
D0            0.00000300 sec
D1            2.00000000 sec
D11           0.03000000 sec
D12           0.00002000 sec
D13           0.00000400 sec
D16           0.00020000 sec
IN0           0.00012480 sec
TDav          1
SFO1          400.1324008 MHz
NUC1          1H
P0            14.50 usec
P1            14.50 usec
P17           2500.00 usec
PLW1          12.69999981 W
PLW10         2.96690011 W
GPNAM[1]      SMSQ10.100
GPZ1          10.00 %
P16           1000.00 usec

F1 - Acquisition parameters
TD            256
SFO1          400.1324 MHz
FIDRES        62.600159 Hz
SW            20.025 ppm
FnMODE        QF

F2 - Processing parameters
SI            1024
SF            400.1299767 MHz
WDW           QSINE
SSB           0
LB            0 Hz
GB            0
PC            1.40

F1 - Processing parameters
SI            1024
MC2           QF
SF            400.1299767 MHz
WDW           QSINE
SSB           0
LB            0 Hz
GB            0
    
```

NOESY of compound 2e

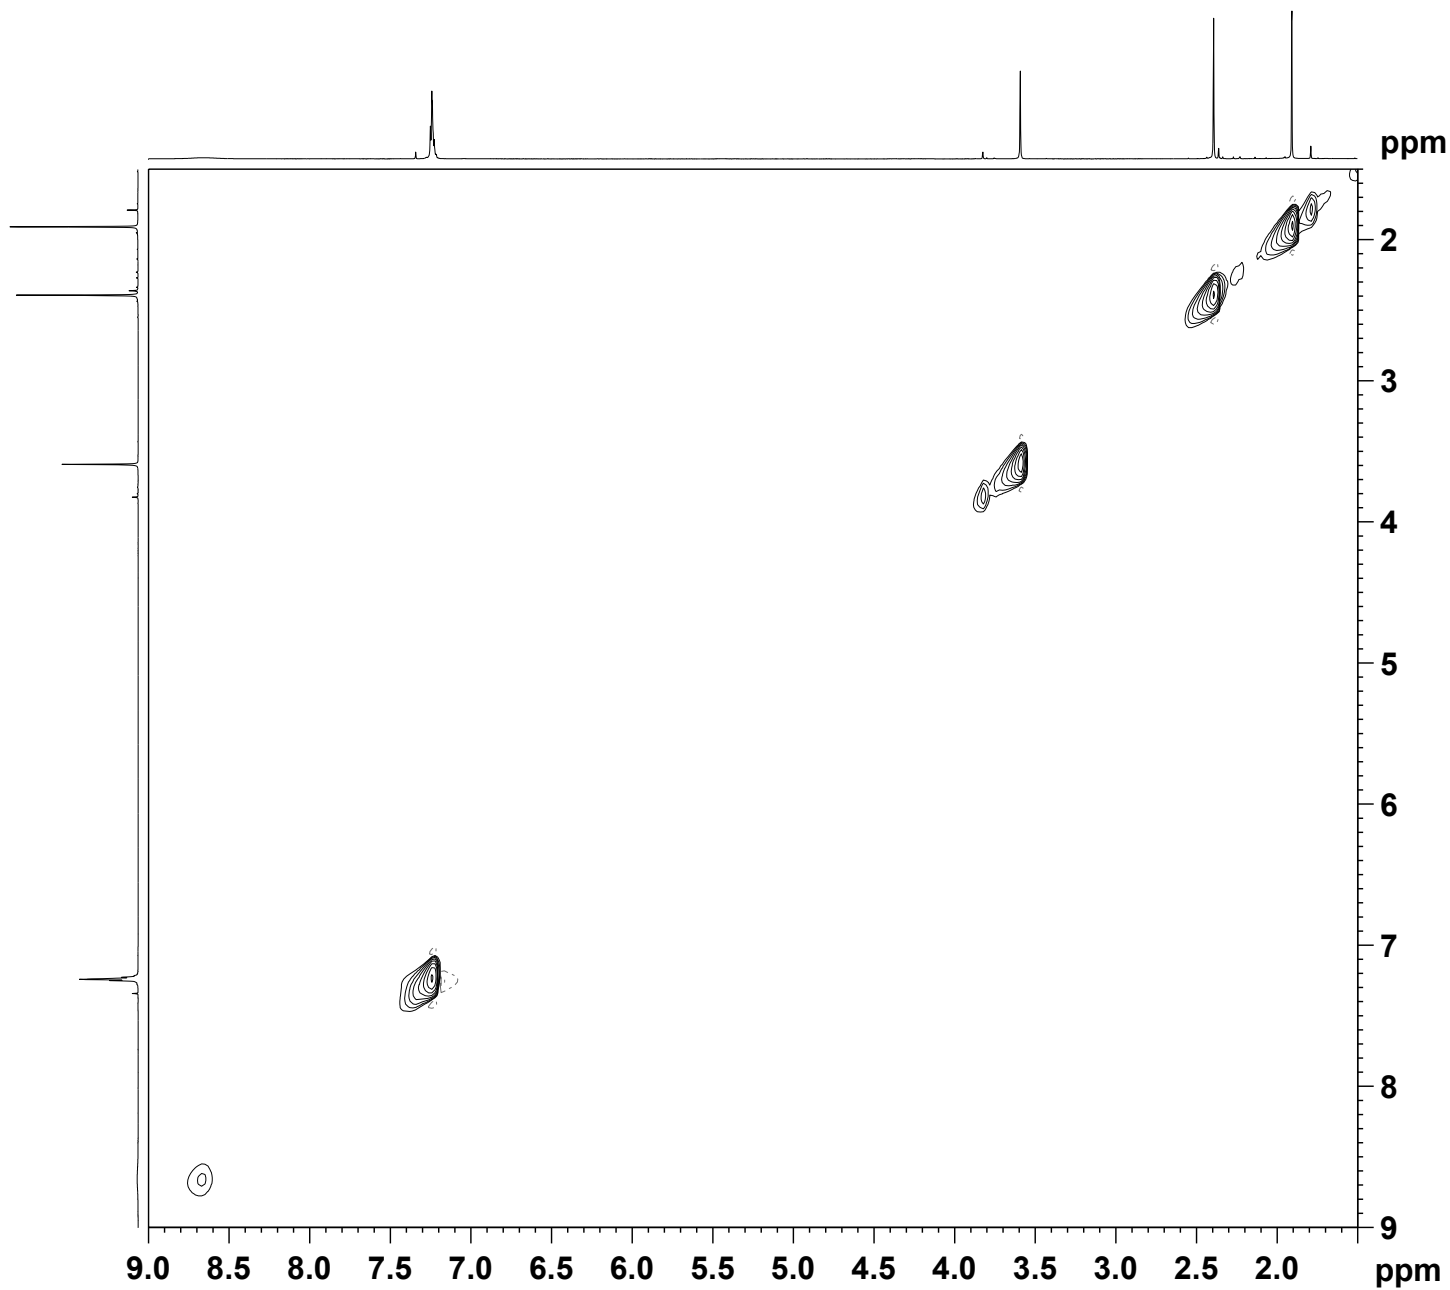

```

Current Data Parameters
NAME      YYH-074
EXPNO    8
PROCNO    1

F2 - Acquisition Parameters
Date_    20210420
Time     21.02 h
INSTRUM  spect
PROBHD   Z108618_0922 (
PULPROG  noesygpphpp
TD       2048
SOLVENT  CDCl3
NS       4
DS       16
SWH      8012.820 Hz
FIDRES   7.825020 Hz
AQ       0.1277952 sec
RG       112.98
DW       62.400 usec
DE       6.50 usec
TE       295.8 K
D0       0.00004394 sec
D1       2.00000000 sec
D8       0.40000001 sec
D11      0.03000000 sec
D12      0.00002000 sec
D16      0.00020000 sec
IN0      0.00012480 sec
TDav     1
SFO1     400.1324008 MHz
NUC1     1H
P1       14.50 usec
P2       29.00 usec
P17      2500.00 usec
PLW1     12.69999981 W
PLW10    2.96690011 W
GPNAM[1] SMSQ10.100
GPZ1     40.00 %
P16      1000.00 usec

F1 - Acquisition parameters
TD       256
SFO1     400.1324 MHz
FIDRES   62.600159 Hz
SW       20.025 ppm
FnMODE   States-TPPI

F2 - Processing parameters
SI       1024
SF       400.1299767 MHz
WDW      QSINE
SSB      2
LB       0 Hz
GB       0
PC       1.40

F1 - Processing parameters
SI       1024
MC2      States-TPPI
SF       400.1299767 MHz
WDW      QSINE
SSB      2
LB       0 Hz
GB       0
    
```

1H NMR (CDCl3, 400 MHz) of compound 2f

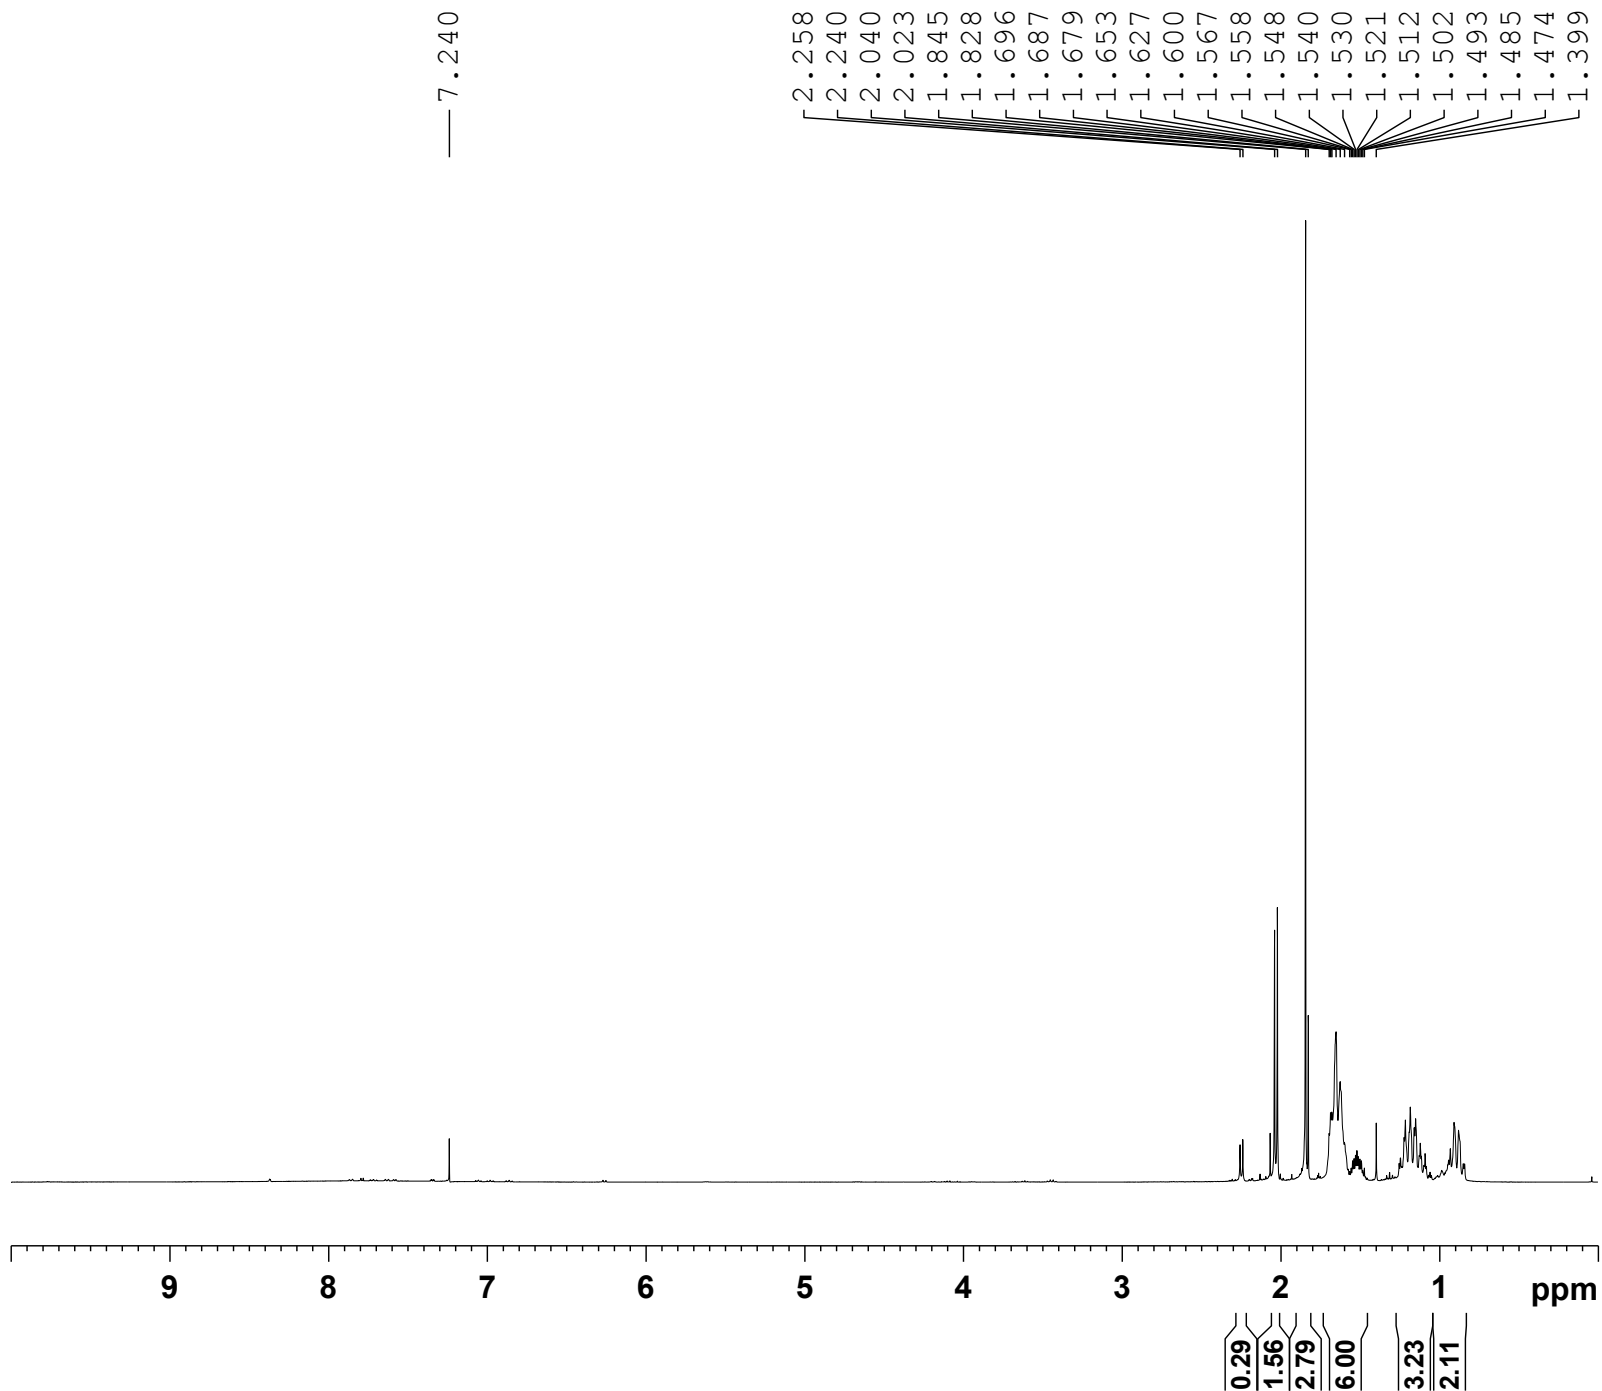

Current Data Parameters  
 NAME YYH-069  
 EXPNO 1  
 PROCNO 1

F2 - Acquisition Parameters  
 Date\_ 20210522  
 Time\_ 22.07 h  
 INSTRUM spect  
 PROBHD z108618\_0922 (  
 PULPROG zg30  
 TD 32768  
 SOLVENT CDCl3  
 NS 16  
 DS 0  
 SWH 8012.820 Hz  
 FIDRES 0.489064 Hz  
 AQ 2.0447233 sec  
 RG 63.35  
 DW 62.400 usec  
 DE 16.43 usec  
 TE 296.3 K  
 D1 2.00000000 sec  
 TD0 1  
 SFO1 400.1324008 MHz  
 NUC1 1H  
 P1 14.50 usec  
 PLW1 13.10000038 W

F2 - Processing parameters  
 SI 16384  
 SF 400.1300173 MHz  
 WDW EM  
 SSB 0  
 LB 0 Hz  
 GB 0  
 PC 1.00

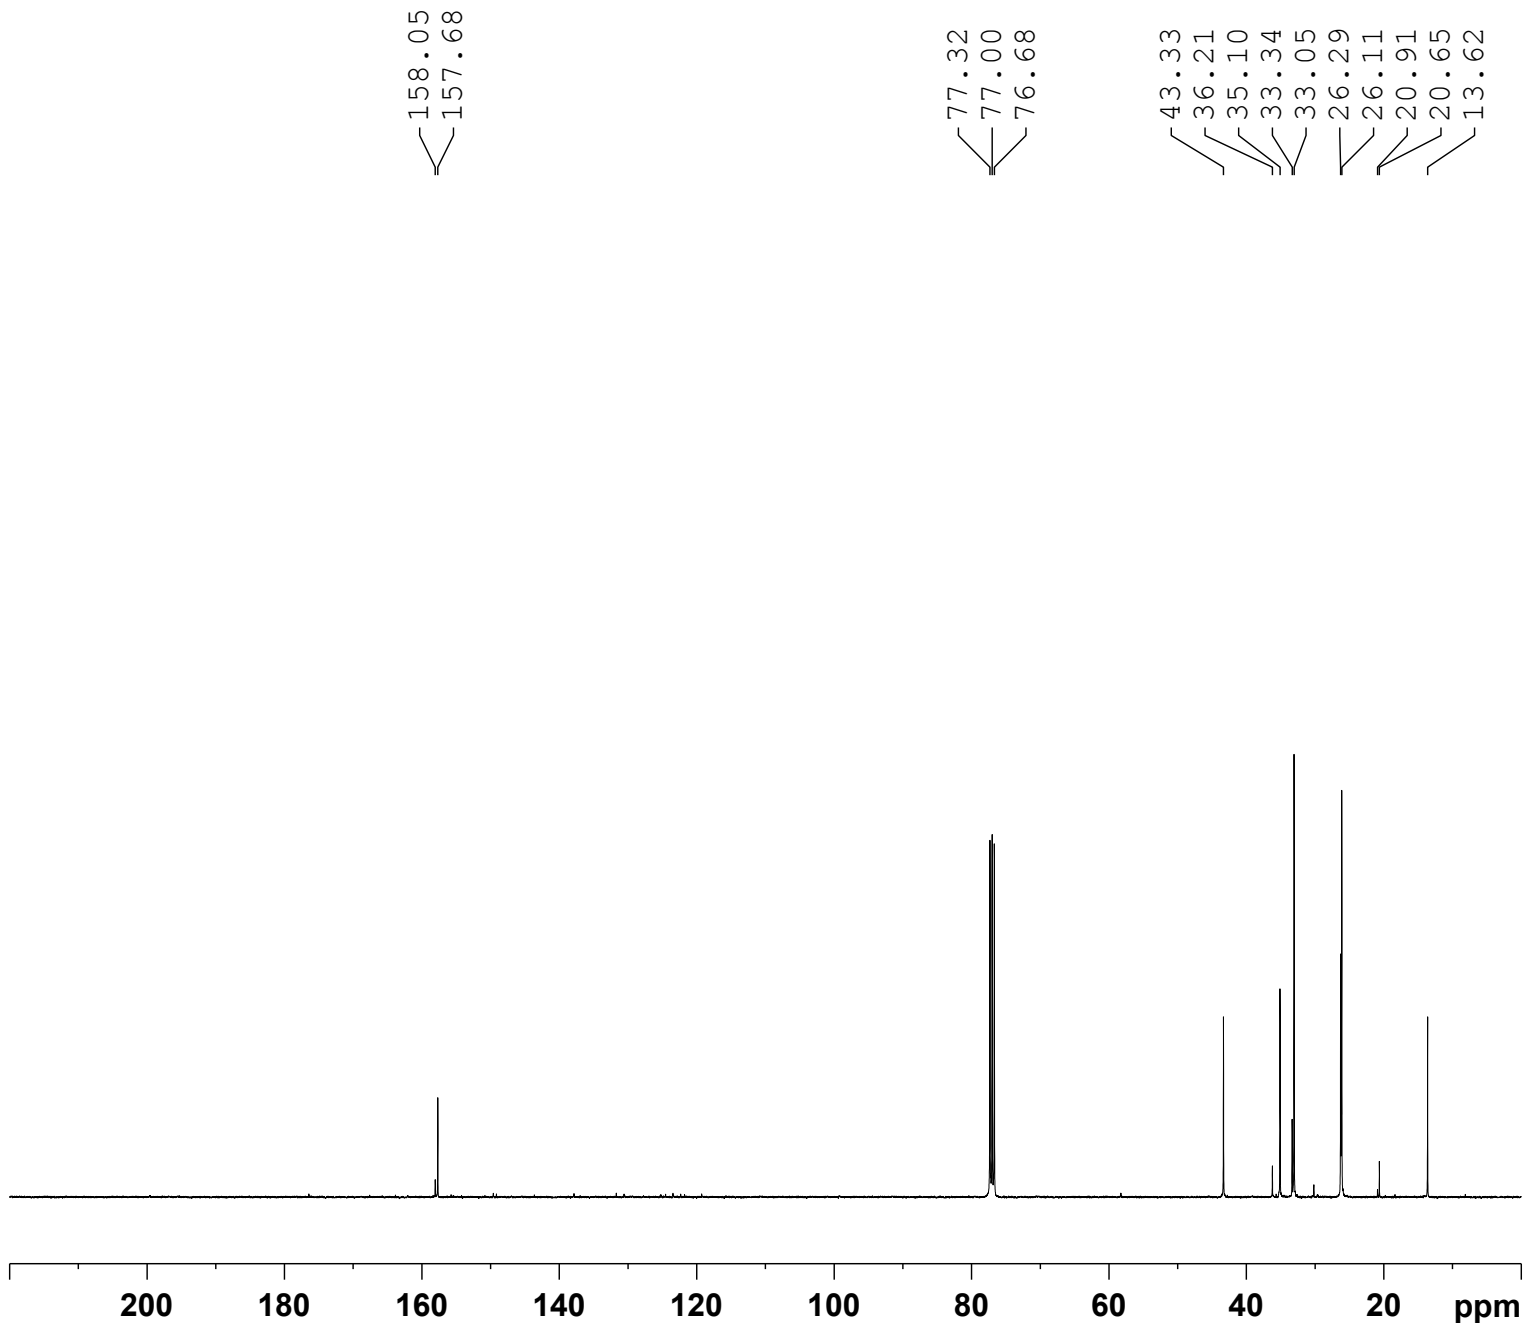

$^{13}\text{C}$  NMR ( $\text{CDCl}_3$ , 100 MHz) of compound **2f**

Current Data Parameters  
 NAME YYH-069  
 EXPNO 2  
 PROCNO 1

F2 - Acquisition Parameters  
 Date\_ 20210523  
 Time\_ 0.48 h  
 INSTRUM spect  
 PROBHD z108618\_0922 (  
 PULPROG zgpg30  
 TD 32768  
 SOLVENT  $\text{CDCl}_3$   
 NS 3500  
 DS 0  
 SWH 24038.461 Hz  
 FIDRES 1.467191 Hz  
 AQ 0.6815744 sec  
 RG 210.28  
 DW 20.800 usec  
 DE 6.50 usec  
 TE 297.4 K  
 D1 2.00000000 sec  
 D11 0.03000000 sec  
 TD0 1  
 SFO1 100.6233329 MHz  
 NUC1  $^{13}\text{C}$   
 P1 10.50 usec  
 PLW1 44.29999924 W  
 SFO2 400.1316005 MHz  
 NUC2  $^1\text{H}$   
 CPDPRG[2] bi\_waltz65\_256  
 PCPD2 90.00 usec  
 PLW2 14.60000038 W  
 PLW12 0.37897000 W  
 PLW13 0.19032000 W

F2 - Processing parameters  
 SI 32768  
 SF 100.6127715 MHz  
 WDW EM  
 SSB 0  
 LB 2.00 Hz  
 GB 0  
 PC 1.00

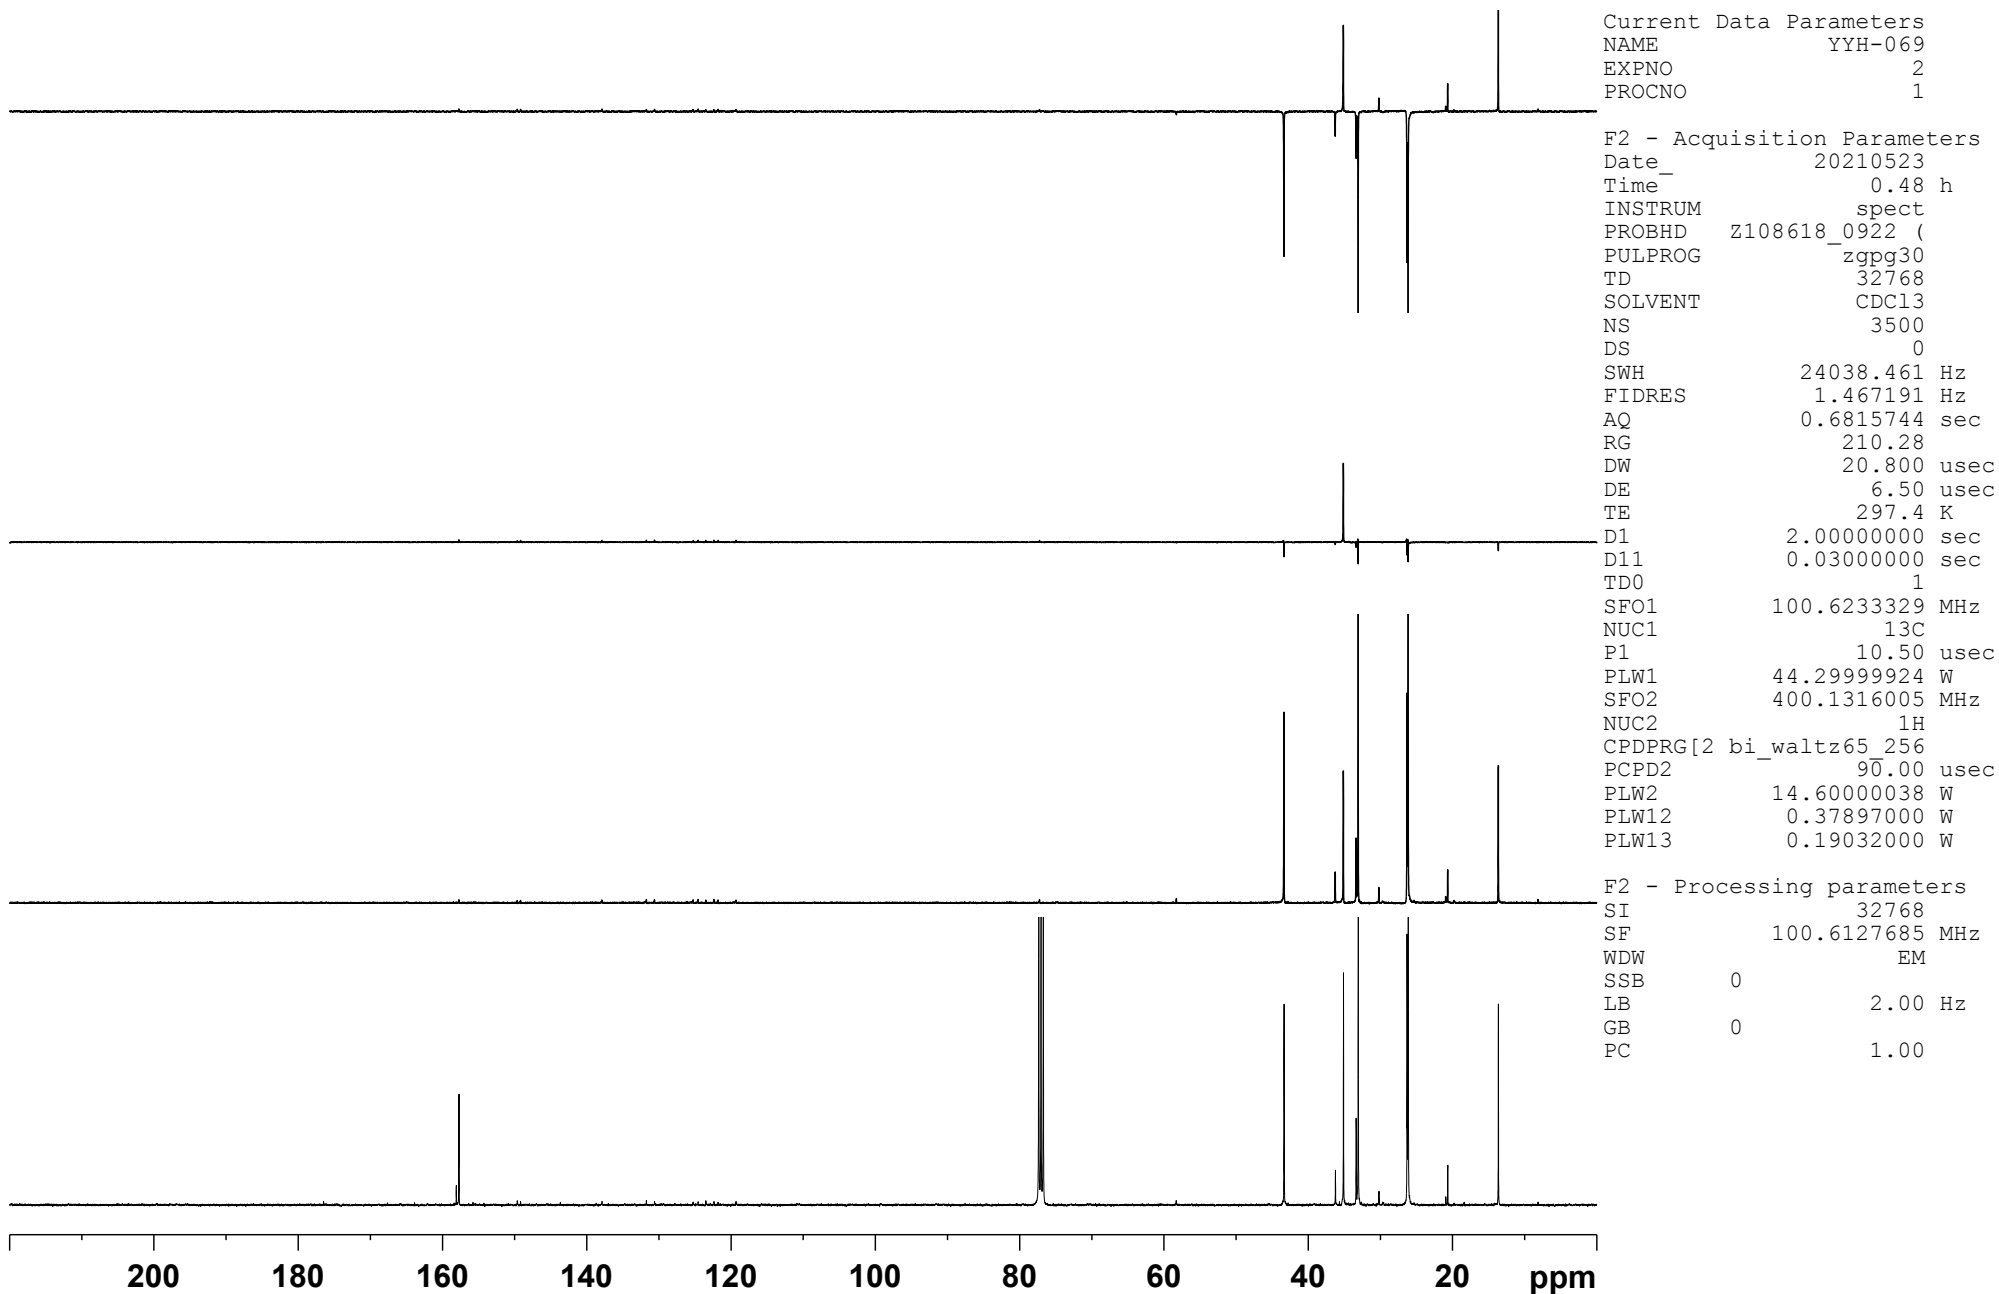DEPT of compound **2f**



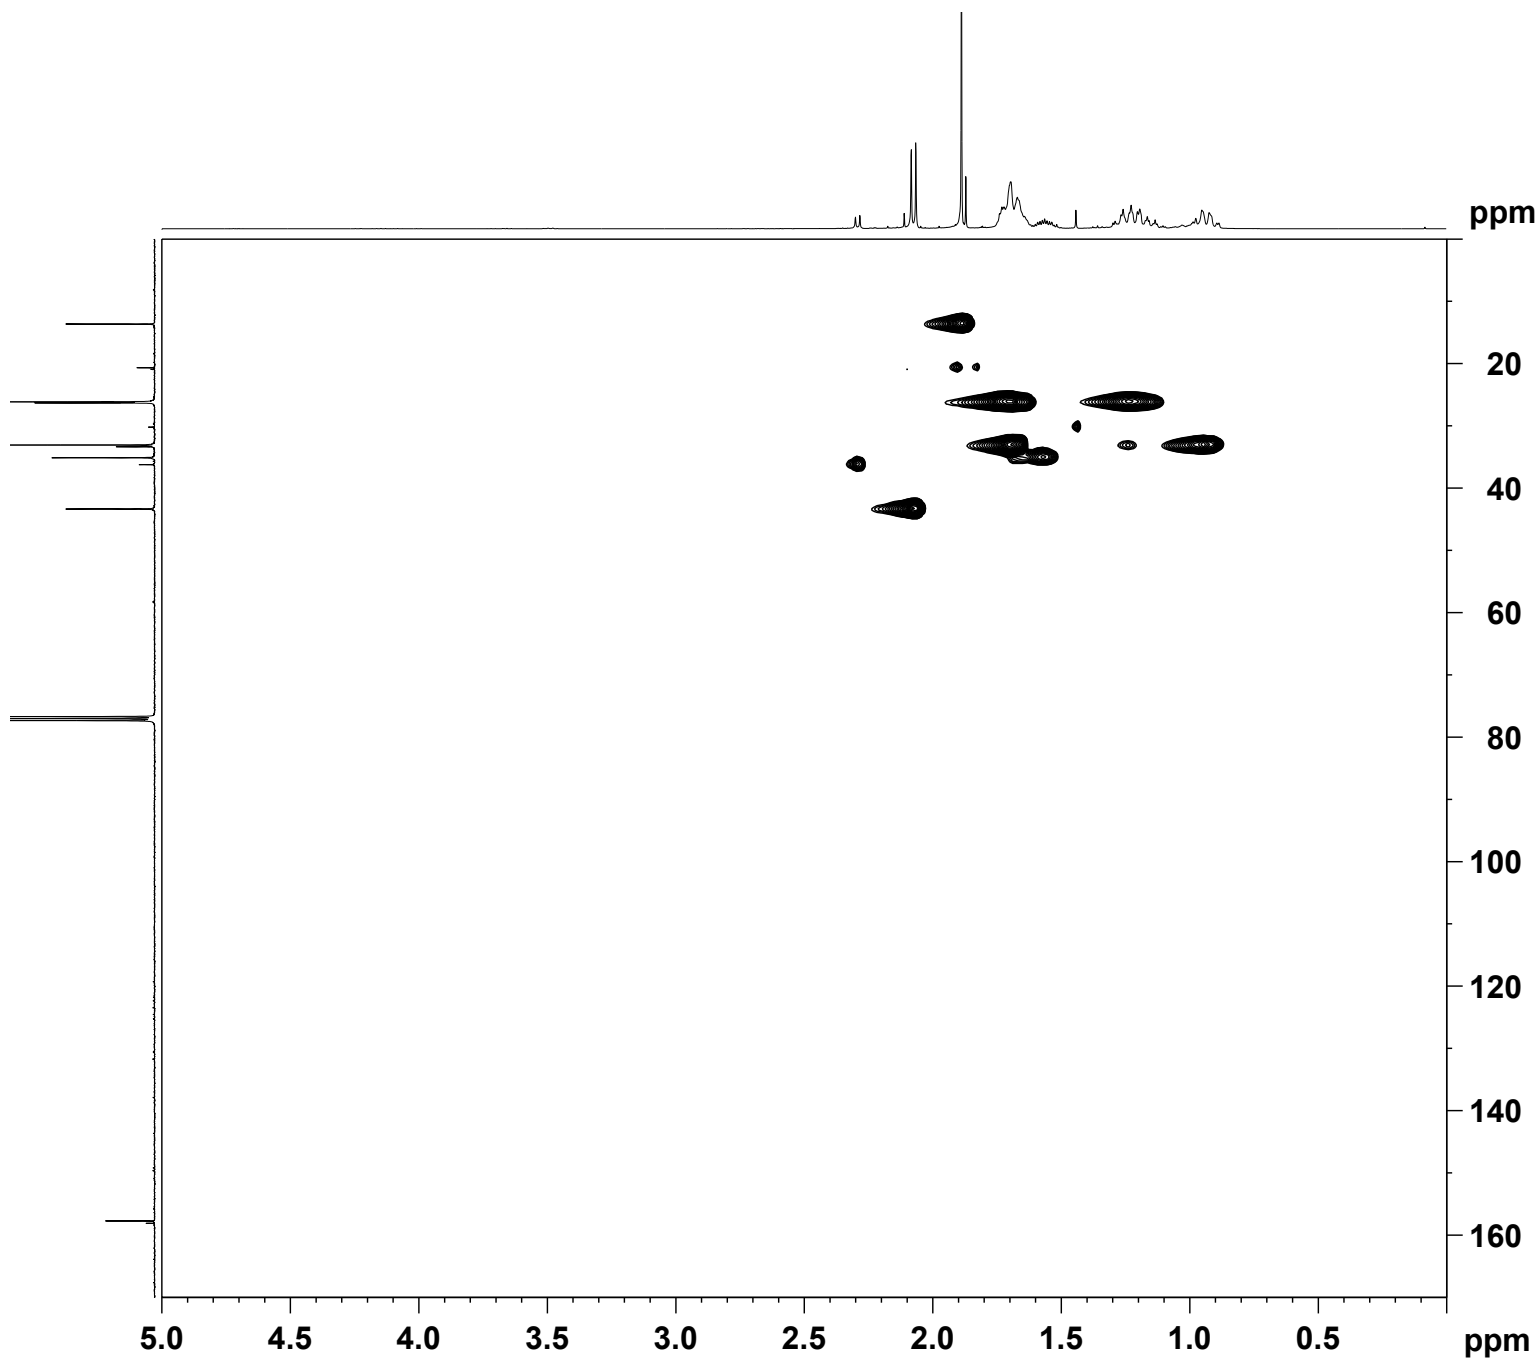

```

Current Data Parameters
NAME          YYH-069
EXPNO         6
PROCNO        1

F2 - Acquisition Parameters
Date_         20210612
Time          15.34 h
INSTRUM       spect
PROBHD        Z108618_0922 (
PULPROG       hsqcetgpsisp2.2
TD            2048
SOLVENT       CDCl3
NS            6
DS            16
SWH           8012.820 Hz
FIDRES        7.825020 Hz
AQ            0.1277952 sec
RG            210.28
DW            62.400 usec
DE            6.50 usec
TE            296.9 K
CNST2         145.0000000
CNST17        -0.5000000
D0            0.00000300 sec
D1            1.50000000 sec
D4            0.00172414 sec
D11           0.03000000 sec
D16           0.00020000 sec
D24           0.00086207 sec
IN0           0.00002080 sec
TDav          1
SFO1          400.1324008 MHz
NUC1          1H
P1            14.50 usec
P2            29.00 usec
P28           1000.00 usec
PLW1          13.10000038 W
SFO2          100.6233329 MHz
NUC2          13C
CPDPRG[2]     garp
P3            10.50 usec
P14           500.00 usec
P24           2000.00 usec
PCPD2         80.00 usec
PLW0          0 W
PLW2          44.00000000 W
PLW12         0.75796998 W
SPNAM[3]      Crp60,0.5,20.1
SFOAL3        0.500
SPOFFS3       0 Hz
SPW3          7.41179991 W
SPNAM[7]      Crp60comp.4
SFOAL7        0.500
SPOFFS7       0 Hz
SPW7          7.41179991 W
GPNAM[1]      SMSQ10.100
GPZ1          80.00 %
GPNAM[2]      SMSQ10.100
GPZ2          20.10 %
GPNAM[3]      SMSQ10.100
GPZ3          11.00 %
GPNAM[4]      SMSQ10.100
GPZ4          -5.00 %
P16           1000.00 usec
P19           600.00 usec

F1 - Acquisition parameters
TD            256
SFO1          100.6233 MHz
FIDRES        187.800476 Hz
SW            238.896 ppm
FnMODE        Echo-Antiecho

F2 - Processing parameters
SI            1024
SF            400.1300000 MHz
WDW           QSINE
SSB           2
LB            0 Hz
GB            0
PC            1.40

F1 - Processing parameters
SI            1024
MC2           echo-antiecho
SF            100.6127685 MHz
WDW           QSINE
SSB           2
LB            0 Hz
GB            0
    
```

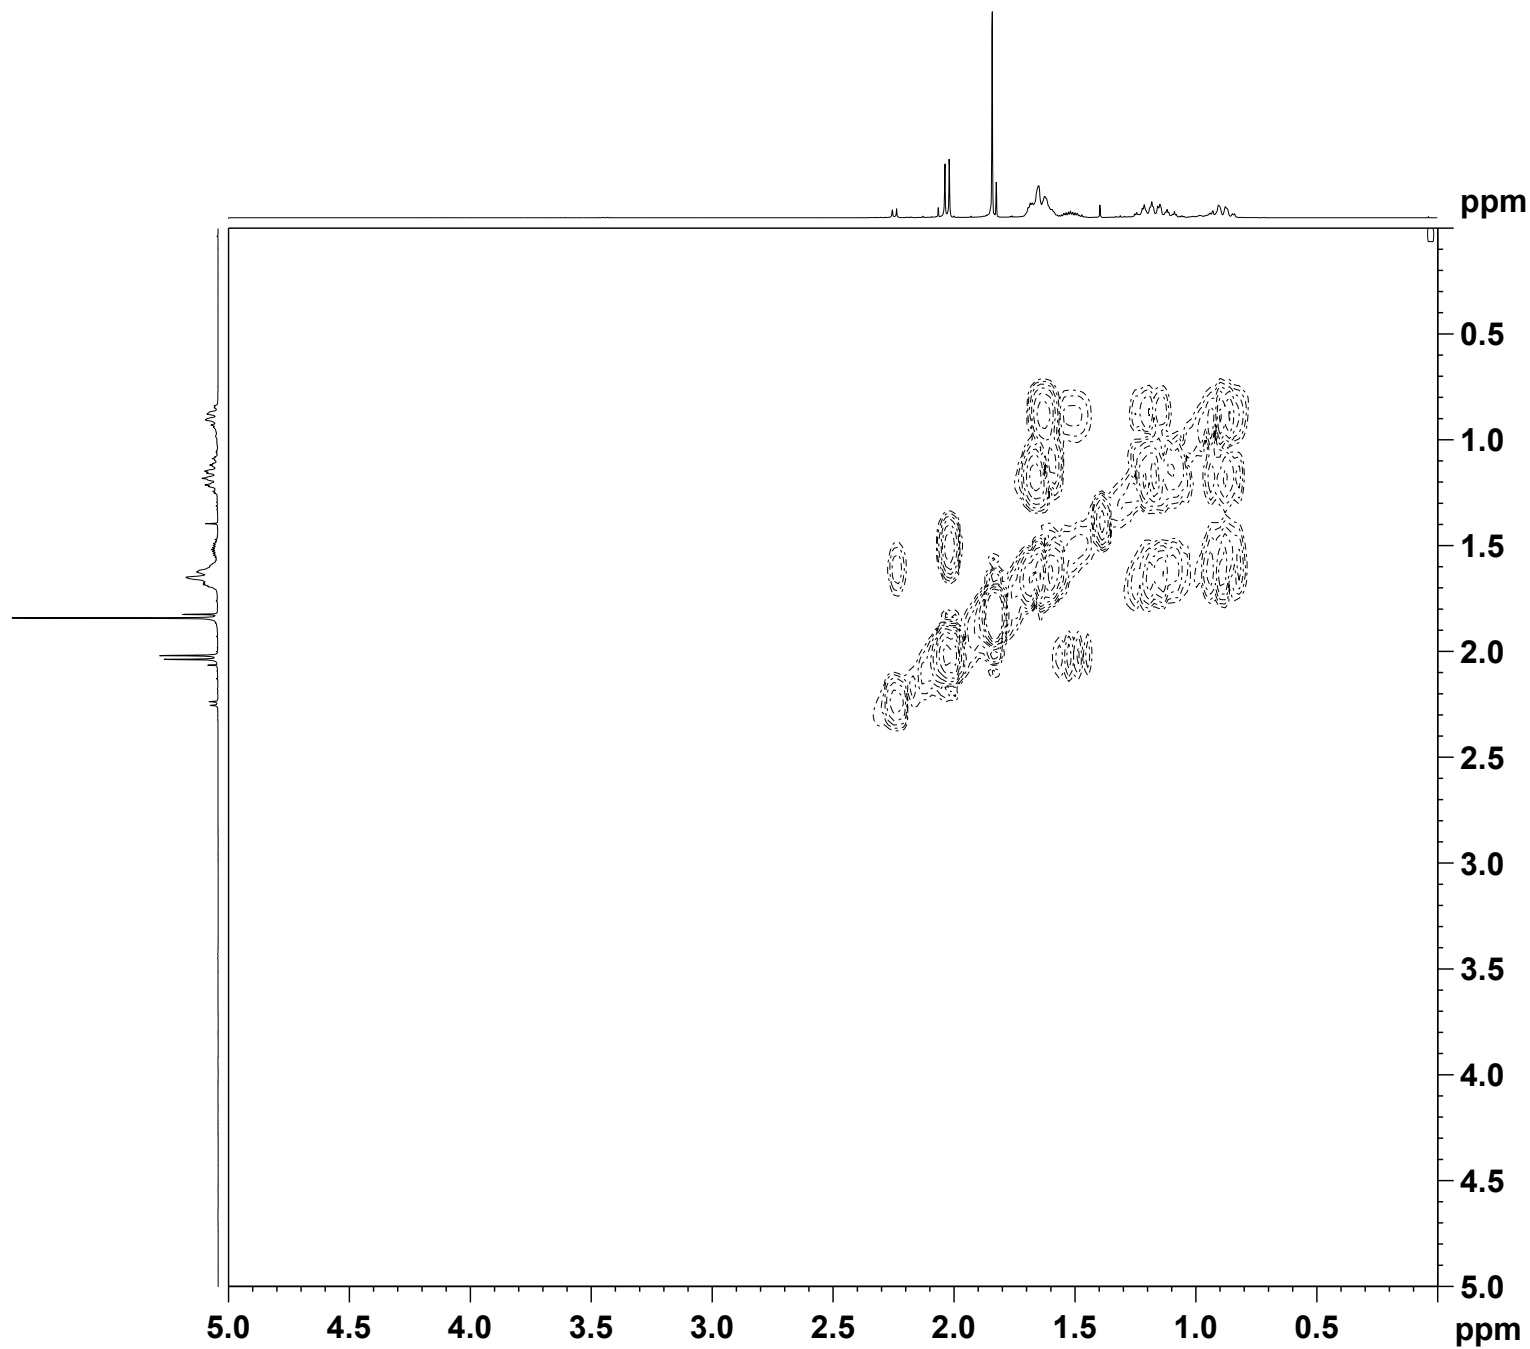

```

Current Data Parameters
NAME          YYH-069
EXPNO         7
PROCNO        1

F2 - Acquisition Parameters
Date_         20210523
Time          7.15 h
INSTRUM       spect
PROBHD        Z108618_0922 (
PULPROG       cosygppppqf
TD            2048
SOLVENT       CDCl3
NS            6
DS            16
SWH           8012.820 Hz
FIDRES        7.825020 Hz
AQ            0.1277952 sec
RG            103.85
DW            62.400 usec
DE            6.50 usec
TE            296.6 K
D0            0.00000300 sec
D1            2.00000000 sec
D11           0.03000000 sec
D12           0.00002000 sec
D13           0.00000400 sec
D16           0.00020000 sec
IN0           0.00012480 sec
TDav          1
SFO1          400.1324008 MHz
NUC1          1H
P0            14.50 usec
P1            14.50 usec
P17           2500.00 usec
PLW1          13.10000038 W
PLW10         3.06030011 W
GPNAM[1]     SMSQ10.100
GPZ1          10.00 %
P16           1000.00 usec

F1 - Acquisition parameters
TD            256
SFO1          400.1324 MHz
FIDRES        62.600159 Hz
SW            20.025 ppm
FnMODE        QF

F2 - Processing parameters
SI            1024
SF            400.1300185 MHz
WDW           QSINE
SSB           0
LB            0 Hz
GB            0
PC            1.40

F1 - Processing parameters
SI            1024
MC2           QF
SF            400.1300185 MHz
WDW           QSINE
SSB           0
LB            0 Hz
GB            0
    
```

NOESY of compound 2f

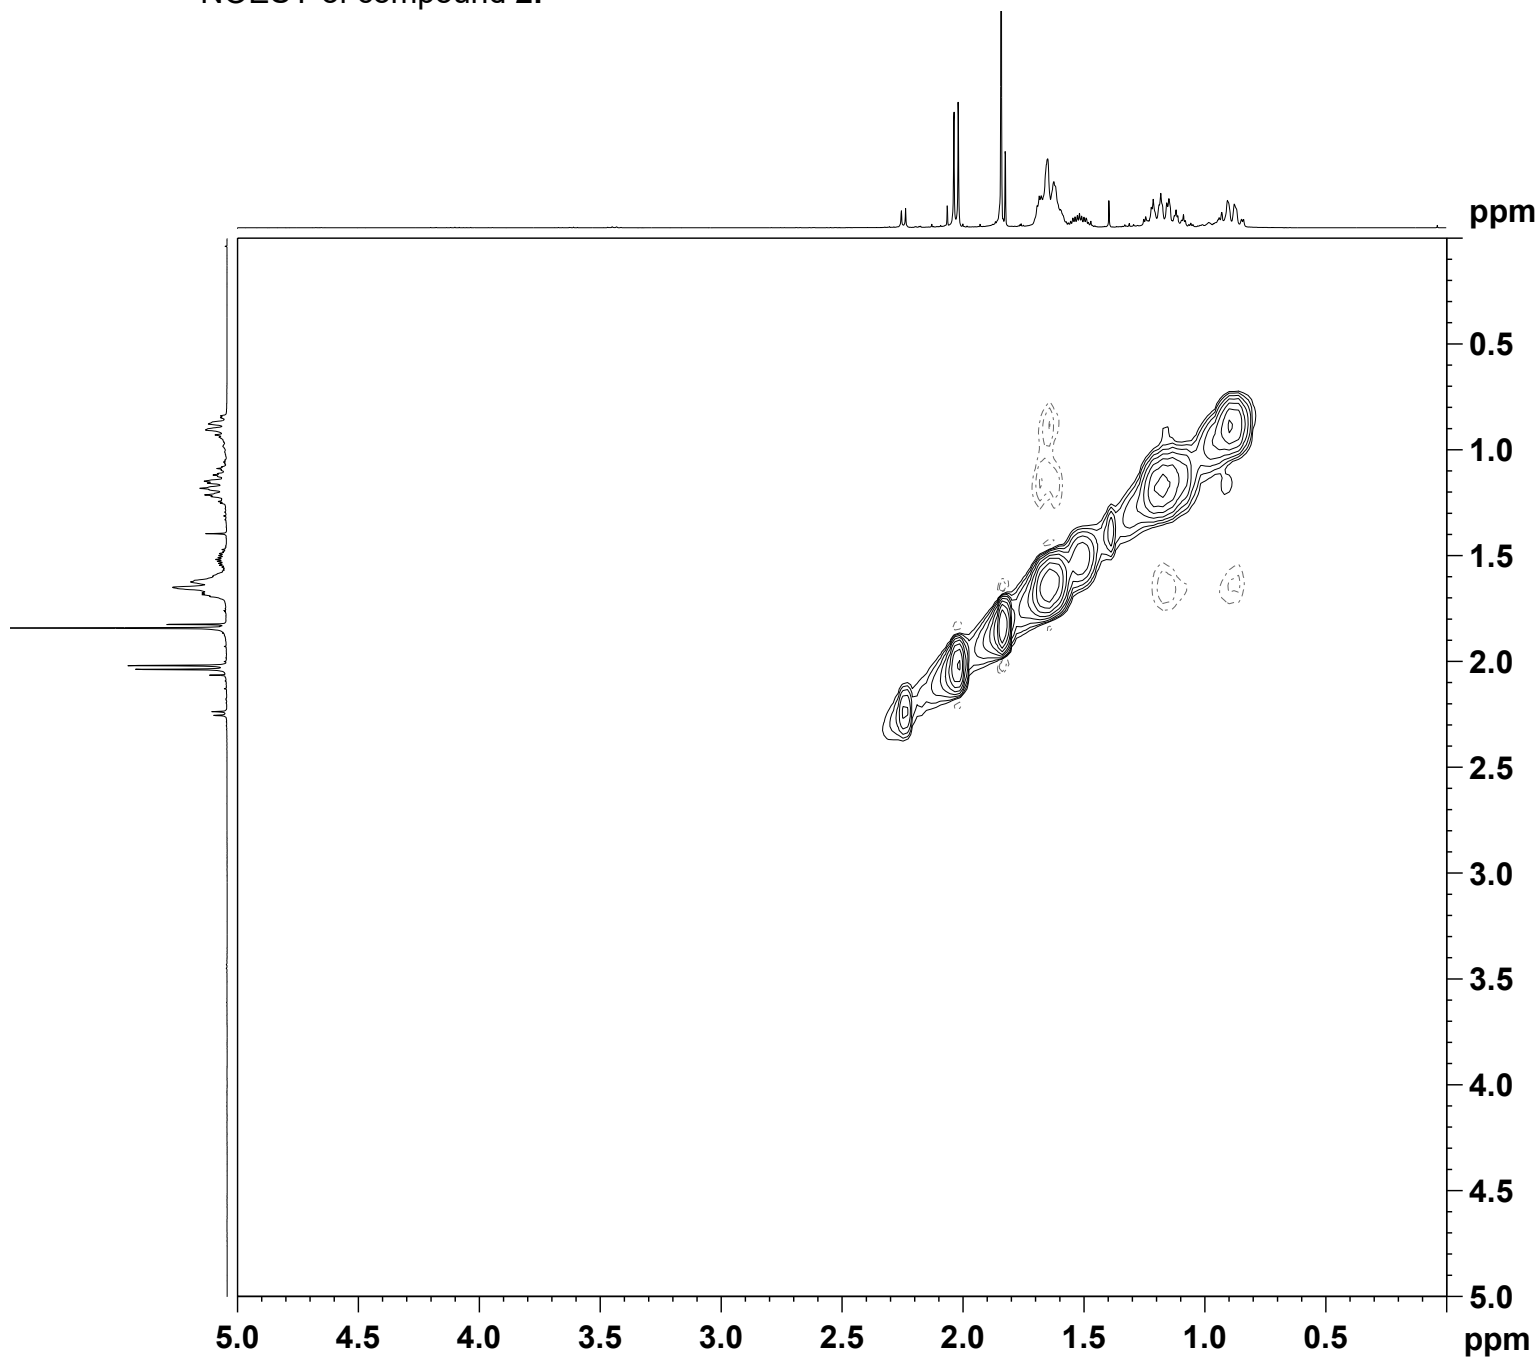

```

Current Data Parameters
NAME          YYH-069
EXPNO        8
PROCNO       1

F2 - Acquisition Parameters
Date_        20210523
Time         8.12 h
INSTRUM      spect
PROBHD       Z108618_0922 (
PULPROG      noesygpphpp
TD           2048
SOLVENT      CDCl3
NS           6
DS           16
SWH          8012.820 Hz
FIDRES       7.825020 Hz
AQ           0.1277952 sec
RG           63.35
DW           62.400 usec
DE           6.50 usec
TE           296.0 K
D0           0.00004394 sec
D1           2.00000000 sec
D8           0.40000001 sec
D11          0.03000000 sec
D12          0.00002000 sec
D16          0.00020000 sec
IN0          0.00012480 sec
TDav         1
SFO1         400.1324008 MHz
NUC1         1H
P1           14.50 usec
P2           29.00 usec
P17          2500.00 usec
PLW1         13.10000038 W
PLW10        3.06030011 W
GPNAM[1]     SMSQ10.100
GPZ1         40.00 %
P16          1000.00 usec

F1 - Acquisition parameters
TD           256
SFO1         400.1324 MHz
FIDRES       62.600159 Hz
SW           20.025 ppm
FnMODE       States-TPPI

F2 - Processing parameters
SI           1024
SF           400.1300185 MHz
WDW          QSINE
SSB          2
LB           0 Hz
GB           0
PC           1.40

F1 - Processing parameters
SI           1024
MC2          States-TPPI
SF           400.1300185 MHz
WDW          QSINE
SSB          2
LB           0 Hz
GB           0
    
```

1H NMR (CDCl3, 400 MHz) of compound 2g

S40

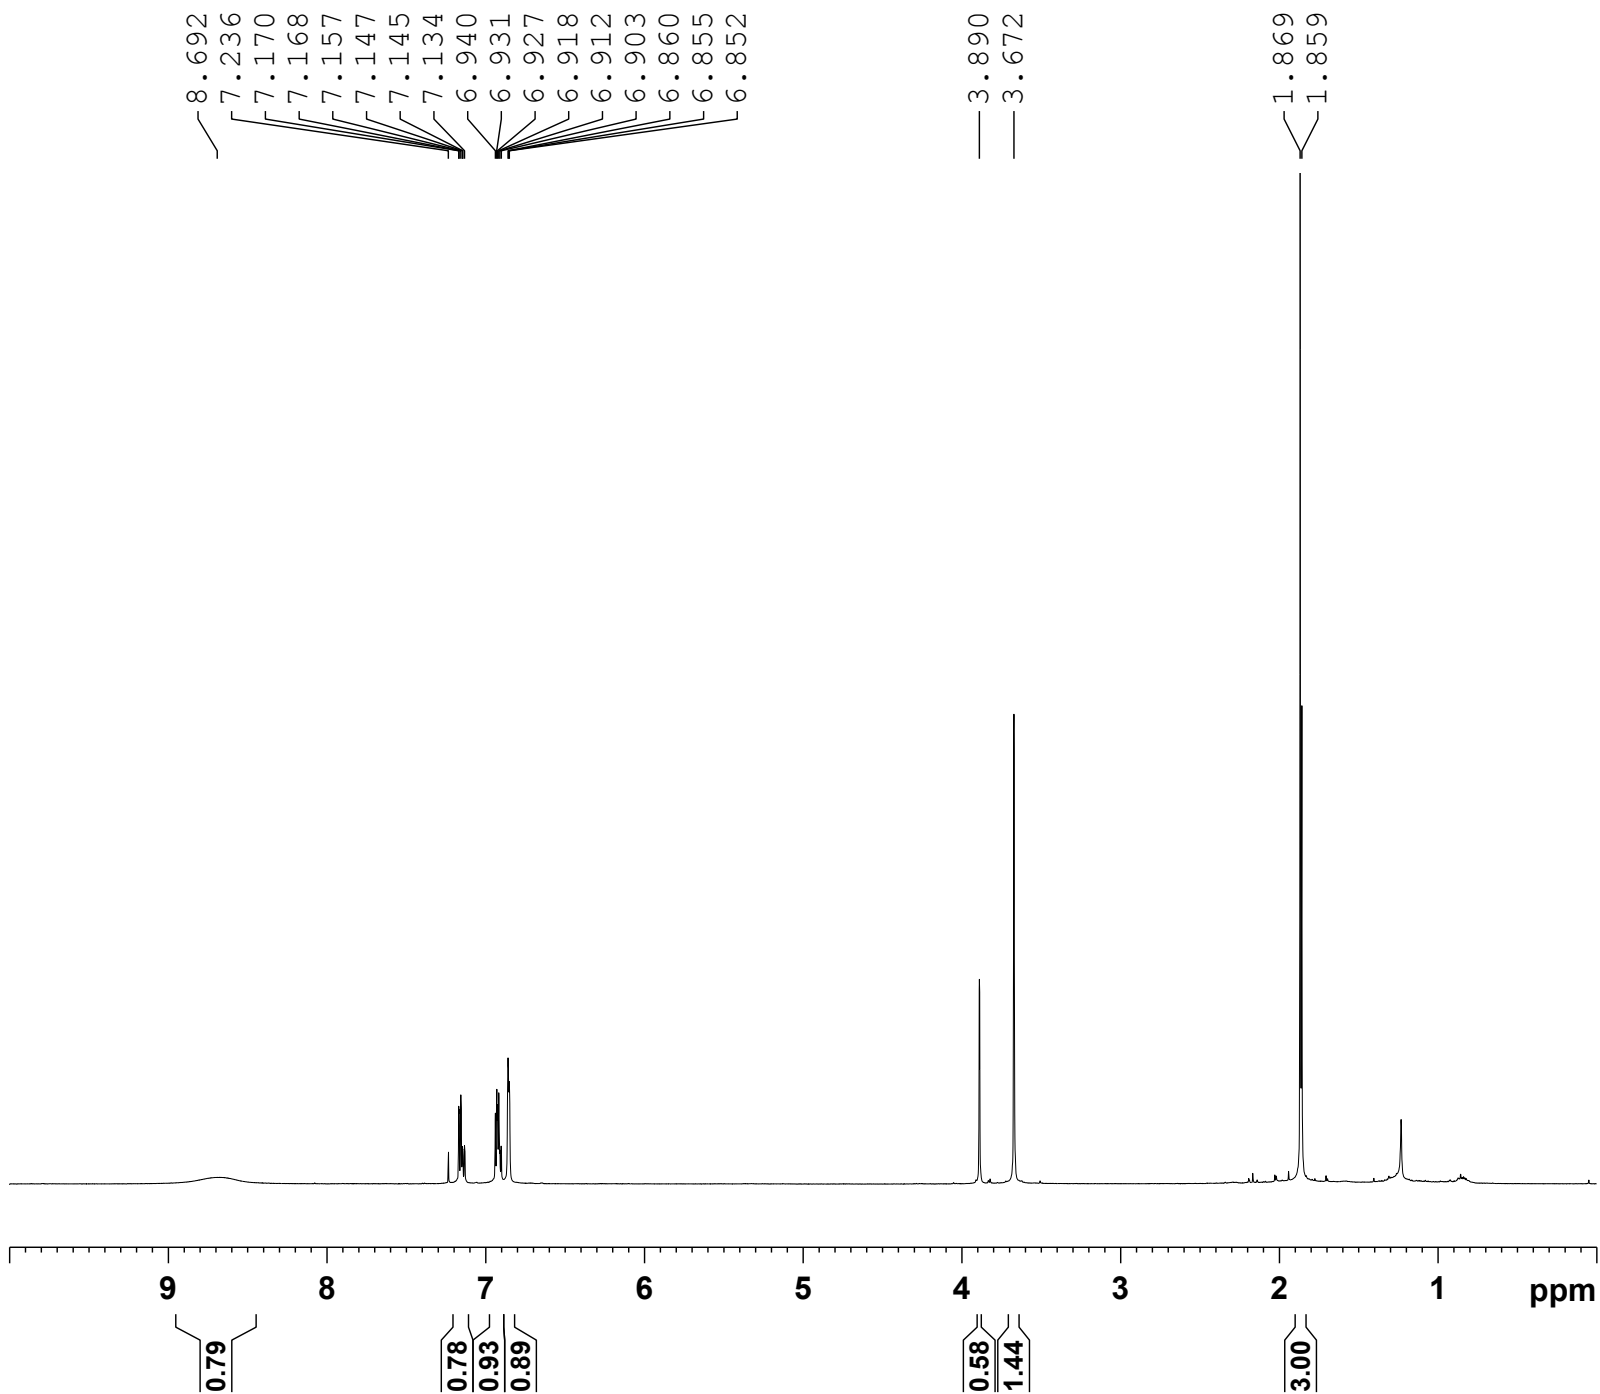

Current Data Parameters  
 NAME YYH-070  
 EXPNO 1  
 PROCNO 1

F2 - Acquisition Parameters  
 Date\_ 20210419  
 Time\_ 16.54 h  
 INSTRUM spect  
 PROBHD Z108618\_0922 (  
 PULPROG zg30  
 TD 32768  
 SOLVENT CDCl3  
 NS 16  
 DS 0  
 SWH 8012.820 Hz  
 FIDRES 0.489064 Hz  
 AQ 2.0447233 sec  
 RG 128.5  
 DW 62.400 usec  
 DE 16.43 usec  
 TE 295.8 K  
 D1 2.00000000 sec  
 TD0 1  
 SFO1 400.1324008 MHz  
 NUC1 1H  
 P1 14.50 usec  
 PLW1 12.69999981 W

F2 - Processing parameters  
 SI 16384  
 SF 400.1300195 MHz  
 WDW EM  
 SSB 0  
 LB 0 Hz  
 GB 0  
 PC 1.00

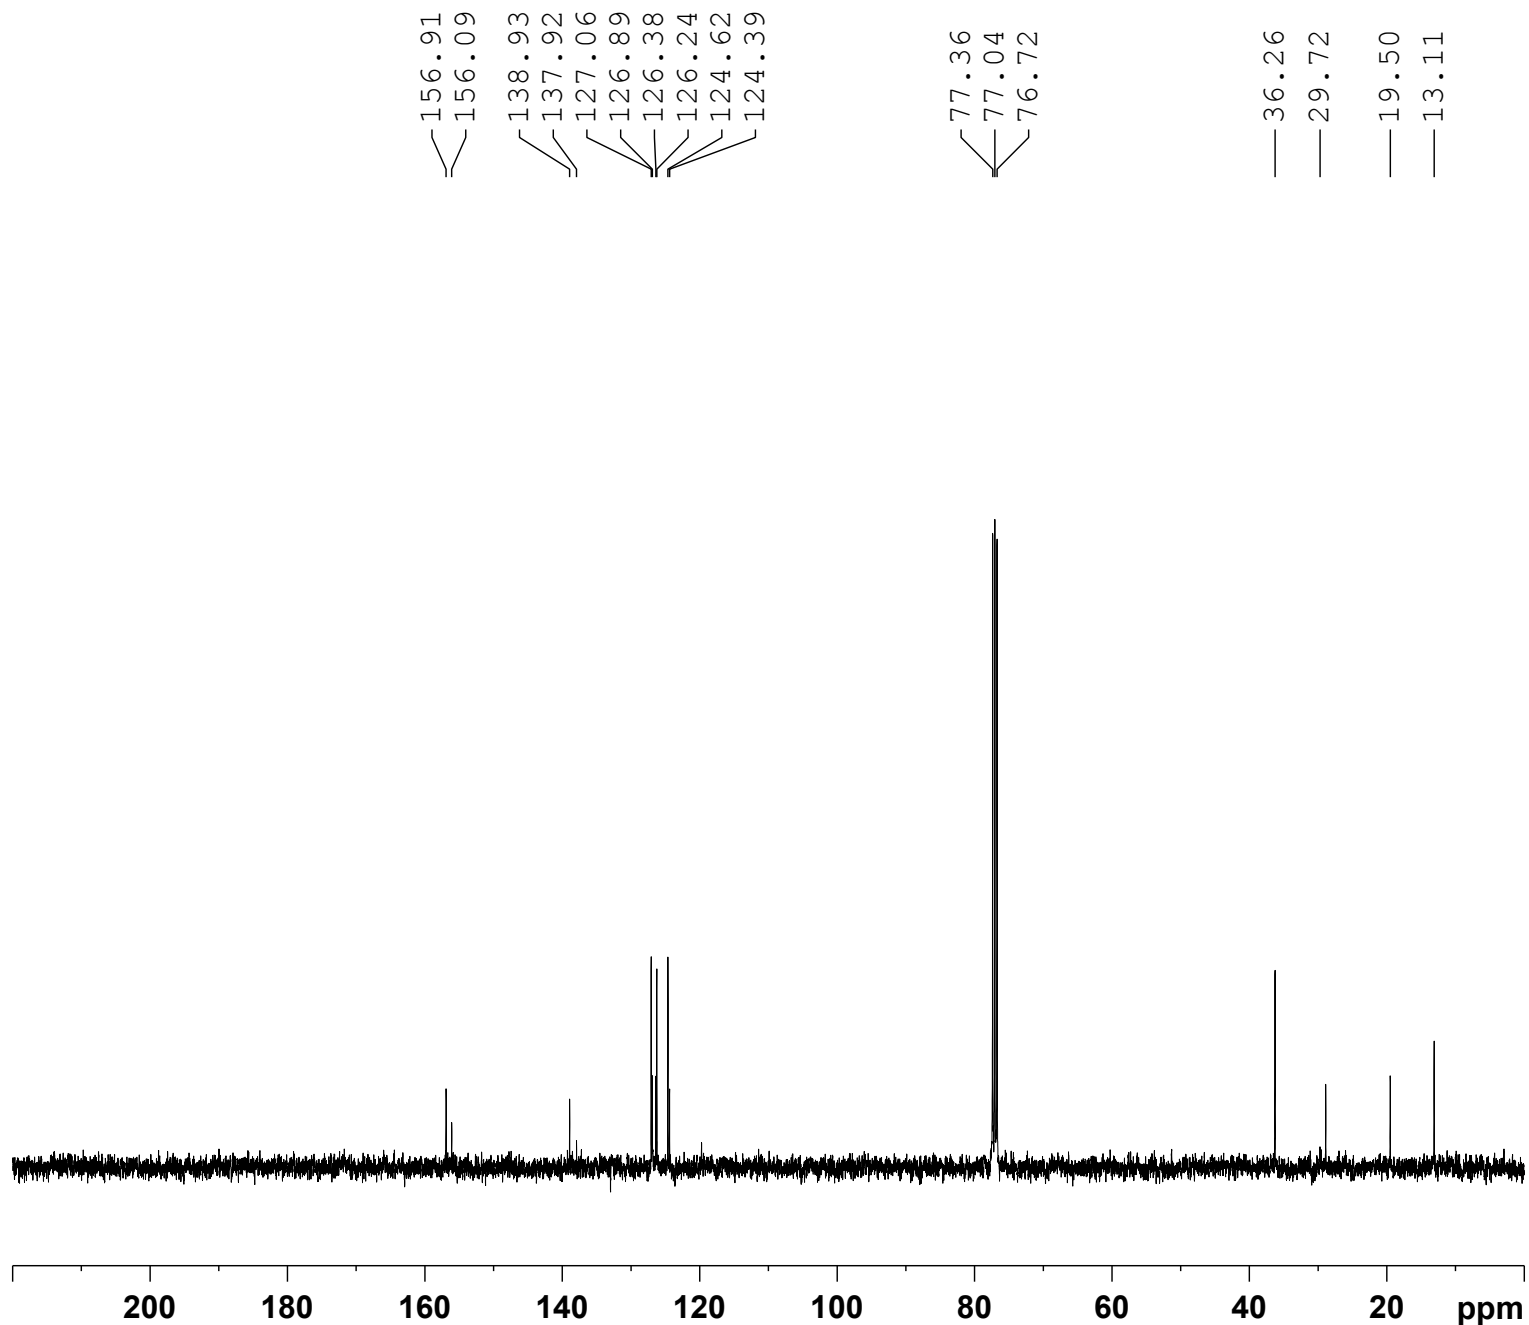

<sup>13</sup>C NMR (CDCl<sub>3</sub>, 100 MHz) of compound **2g**

Current Data Parameters  
 NAME YYH-070  
 EXPNO 2  
 PROCNO 1

F2 - Acquisition Parameters  
 Date\_ 20210419  
 Time\_ 16.57 h  
 INSTRUM spect  
 PROBHD z108618\_0922 (  
 PULPROG zgpg30  
 TD 32768  
 SOLVENT CDC13  
 NS 64  
 DS 0  
 SWH 24038.461 Hz  
 FIDRES 1.467191 Hz  
 AQ 0.6815744 sec  
 RG 210.28  
 DW 20.800 usec  
 DE 6.50 usec  
 TE 296.0 K  
 D1 2.00000000 sec  
 D11 0.03000000 sec  
 TD0 1  
 SFO1 100.6233329 MHz  
 NUC1 13C  
 P1 10.50 usec  
 PLW1 44.09999847 W  
 SFO2 400.1316005 MHz  
 NUC2 1H  
 CPDPRG[2 bi\_waltz65 256  
 PCPD2 90.00 usec  
 PLW2 14.30000019 W  
 PLW12 0.37118000 W  
 PLW13 0.18640999 W

F2 - Processing parameters  
 SI 32768  
 SF 100.6127685 MHz  
 WDW EM  
 SSB 0  
 LB 2.00 Hz  
 GB 0  
 PC 1.00

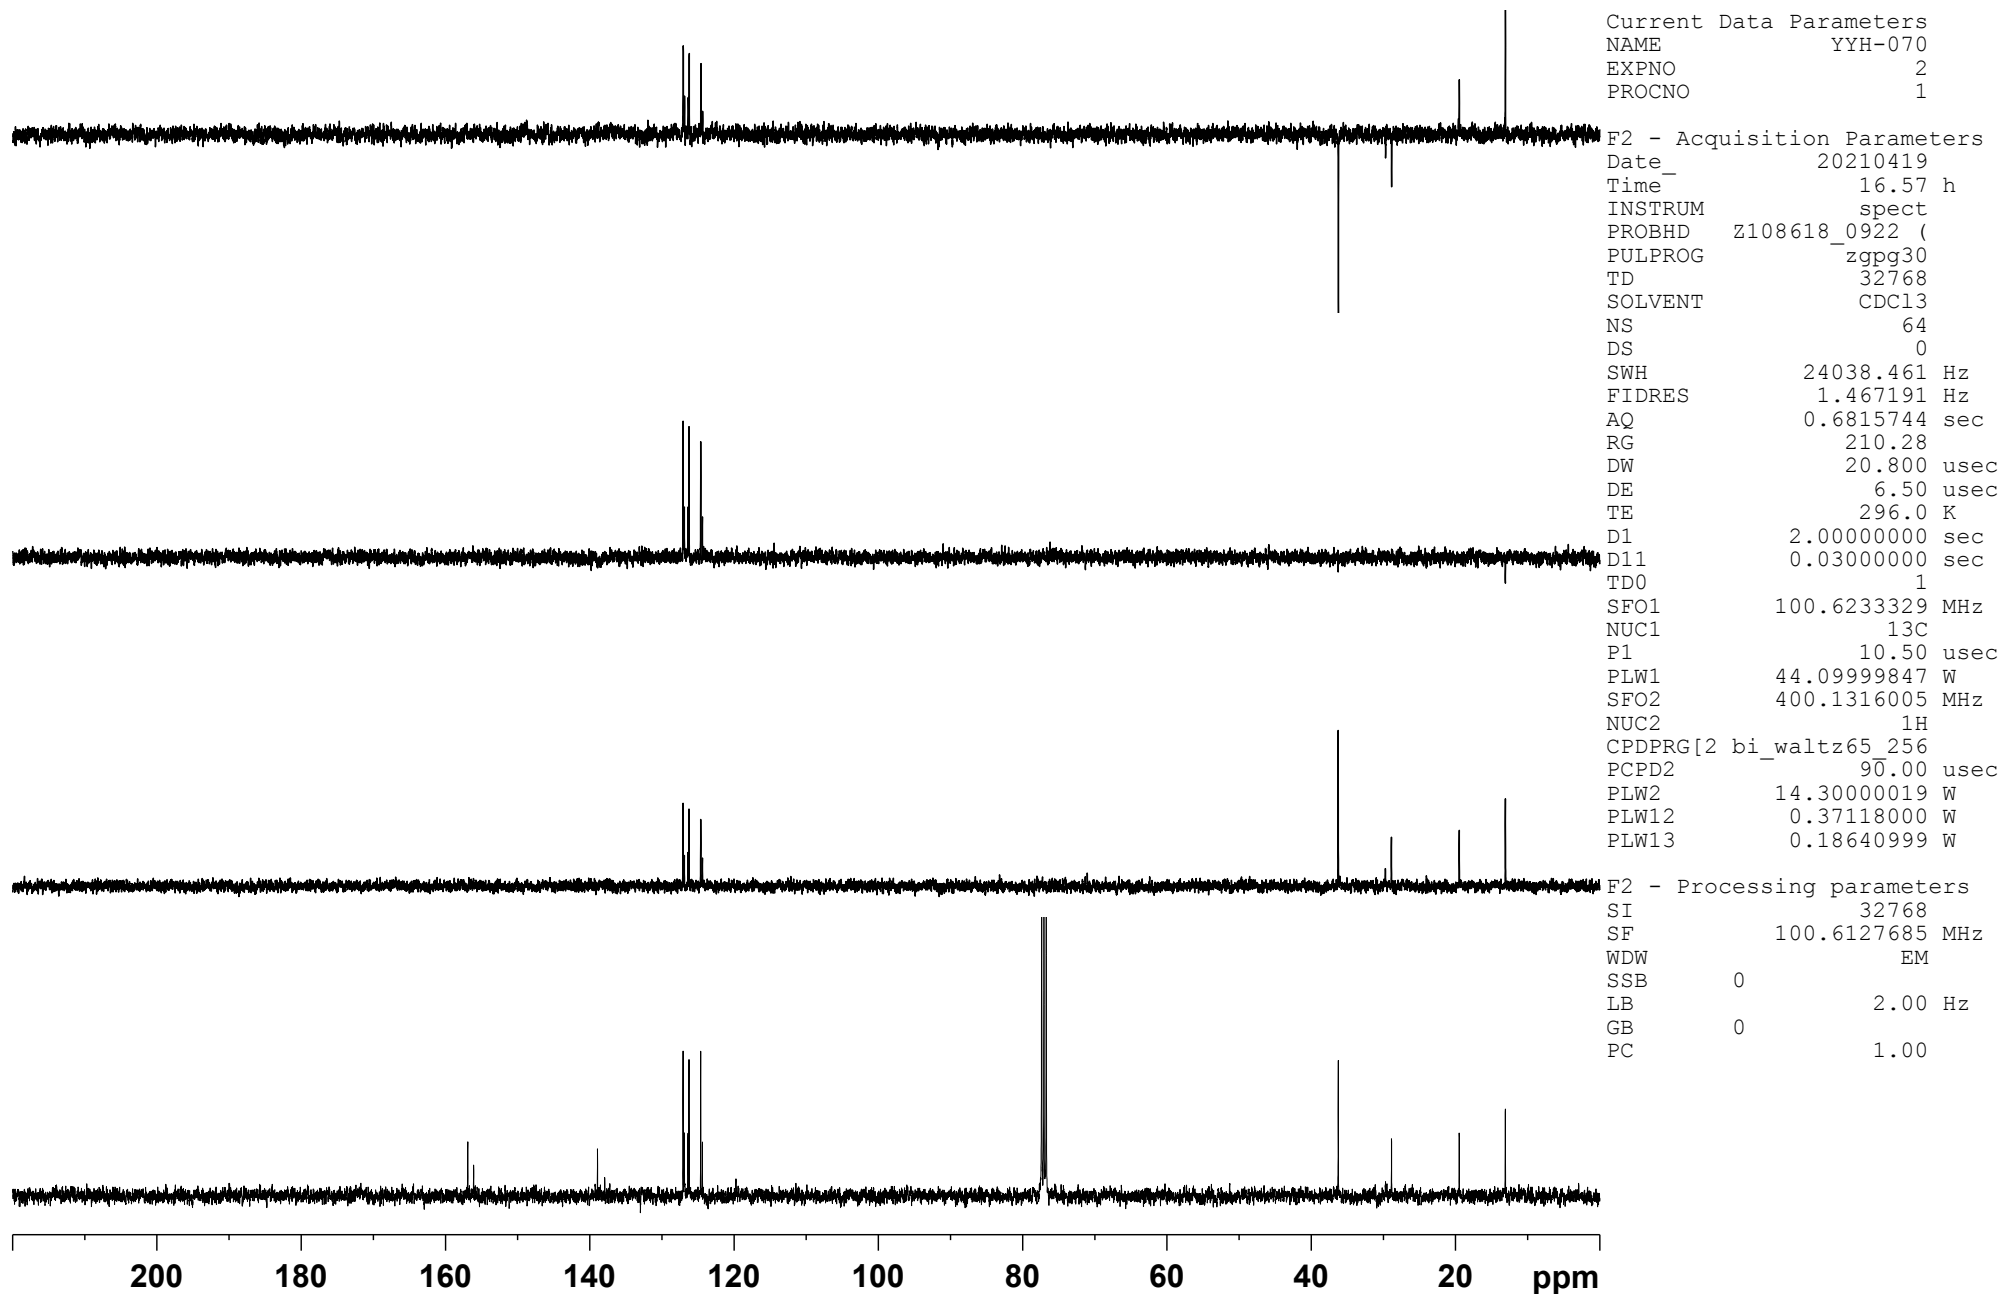

DEPT of compound 2g

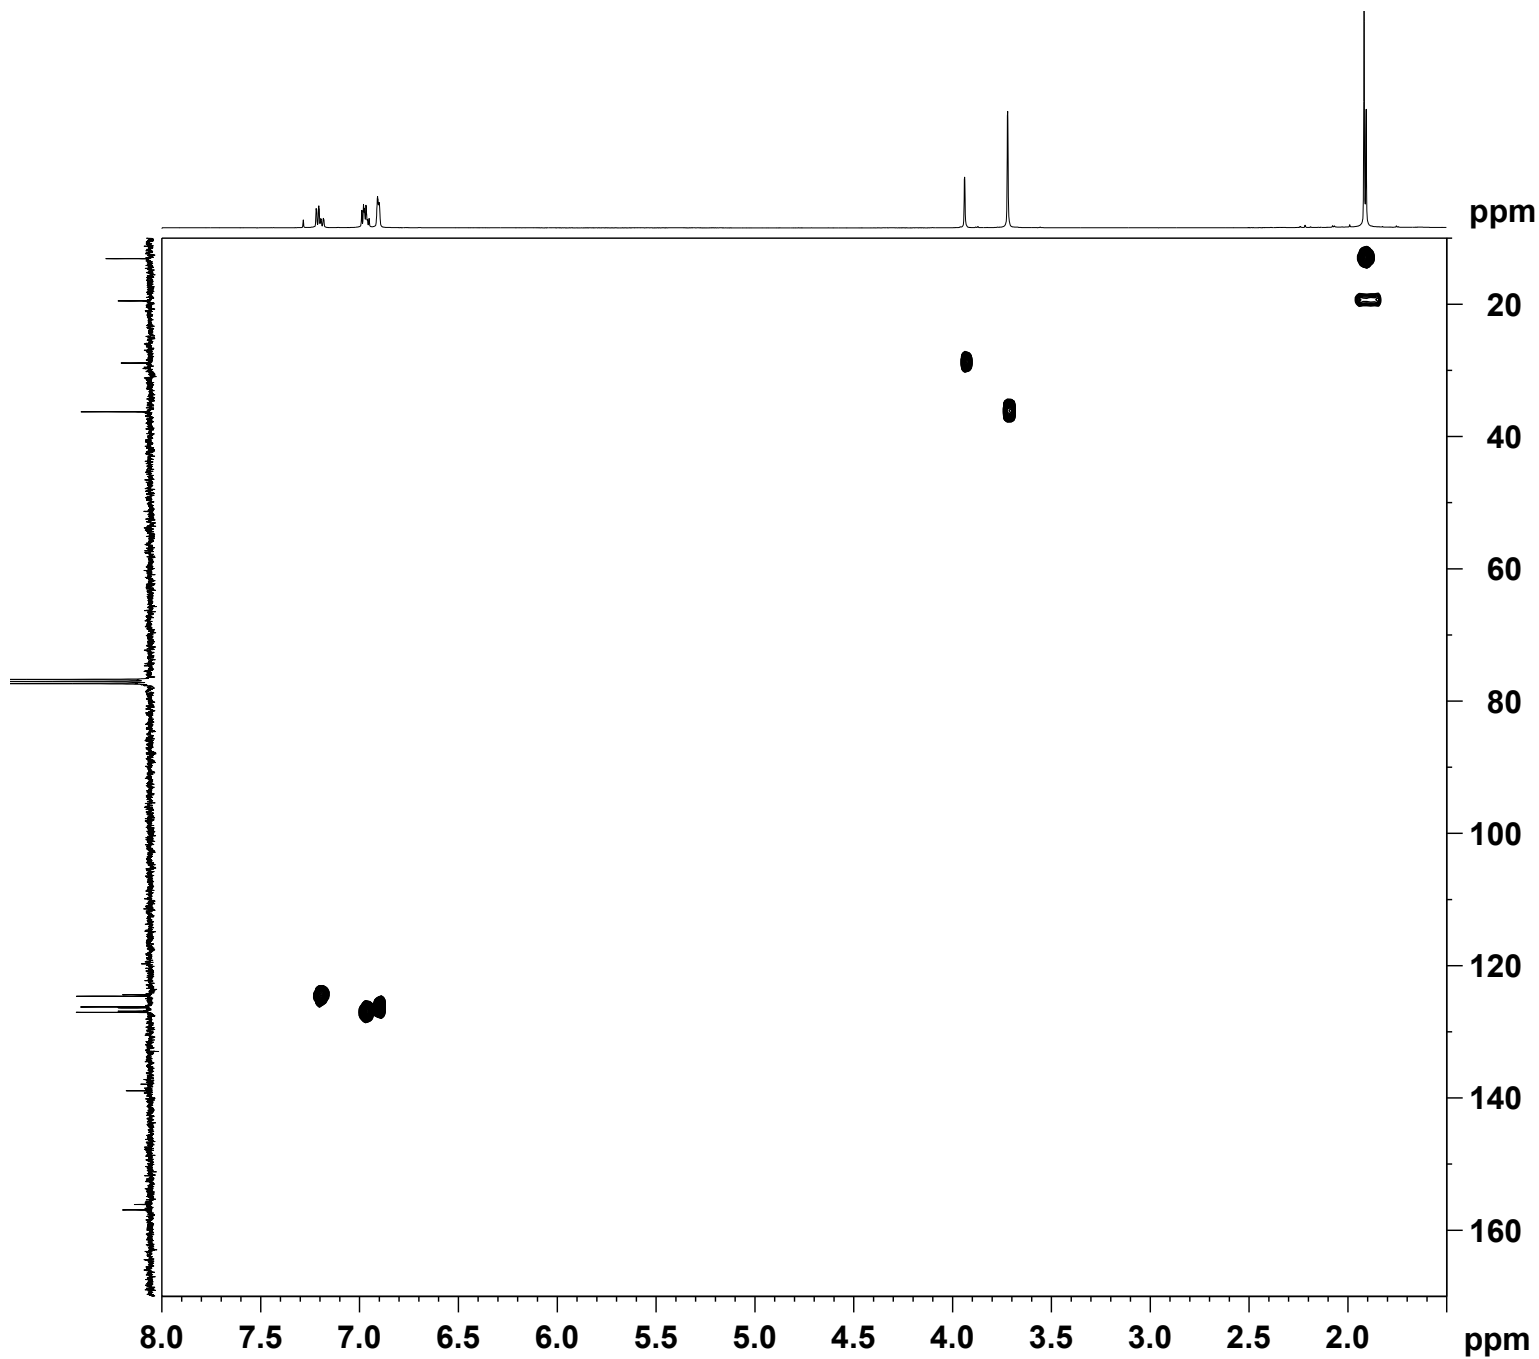

```

Current Data Parameters
NAME      YYH-070
EXPNO    6
PROCNO   1

F2 - Acquisition Parameters
Date_    20210419
Time     18.38 h
INSTRUM  spect
PROBHD   Z108618_0922 (
PULPROG  hsqcetgpsisp2.2
TD       2048
SOLVENT  CDCl3
NS       6
DS       16
SWH      8012.820 Hz
FIDRES   7.825020 Hz
AQ       0.1277952 sec
RG       210.28
DW       62.400 usec
DE       6.50 usec
TE       295.3 K
CNST2    145.0000000
CNST17   -0.5000000
D0       0.00000300 sec
D1       1.50000000 sec
D4       0.00172414 sec
D11      0.03000000 sec
D16      0.00020000 sec
D24      0.00086207 sec
IN0      0.00002080 sec
TDav     1
SFO1     400.1324008 MHz
NUC1     1H
P1       14.50 usec
P2       29.00 usec
P28      1000.00 usec
PLW1     12.69999981 W
SFO2     100.6233329 MHz
NUC2     13C
CPDPRG[2] garp
P3       10.50 usec
P14      500.00 usec
P24      2000.00 usec
PCPD2    80.00 usec
PLW0     0 W
PLW2     44.00000000 W
PLW12    0.75796998 W
SFOAL3   0.500
SPOFFS3  0 Hz
SPW3     7.41179991 W
SFOAL7   0.500
SPOFFS7  0 Hz
SPW7     7.41179991 W
GPNAM[1] SMSQ10.100
GPZ1     80.00 %
GPNAM[2] SMSQ10.100
GPZ2     20.10 %
GPNAM[3] SMSQ10.100
GPZ3     11.00 %
GPNAM[4] SMSQ10.100
GPZ4     -5.00 %
P16      1000.00 usec
P19      600.00 usec

F1 - Acquisition parameters
TD       256
SFO1     100.6233 MHz
FIDRES   187.800476 Hz
SW       238.896 ppm
FnMODE   Echo-Antiecho

F2 - Processing parameters
SI       1024
SF       400.1300000 MHz
WDW      QSINE
SSB      2
LB       0 Hz
GB       0
PC       1.40

F1 - Processing parameters
SI       1024
MC2      echo-antiecho
SF       100.6127685 MHz
WDW      QSINE
SSB      2
LB       0 Hz
GB       0
    
```

## COSY of compound 2g

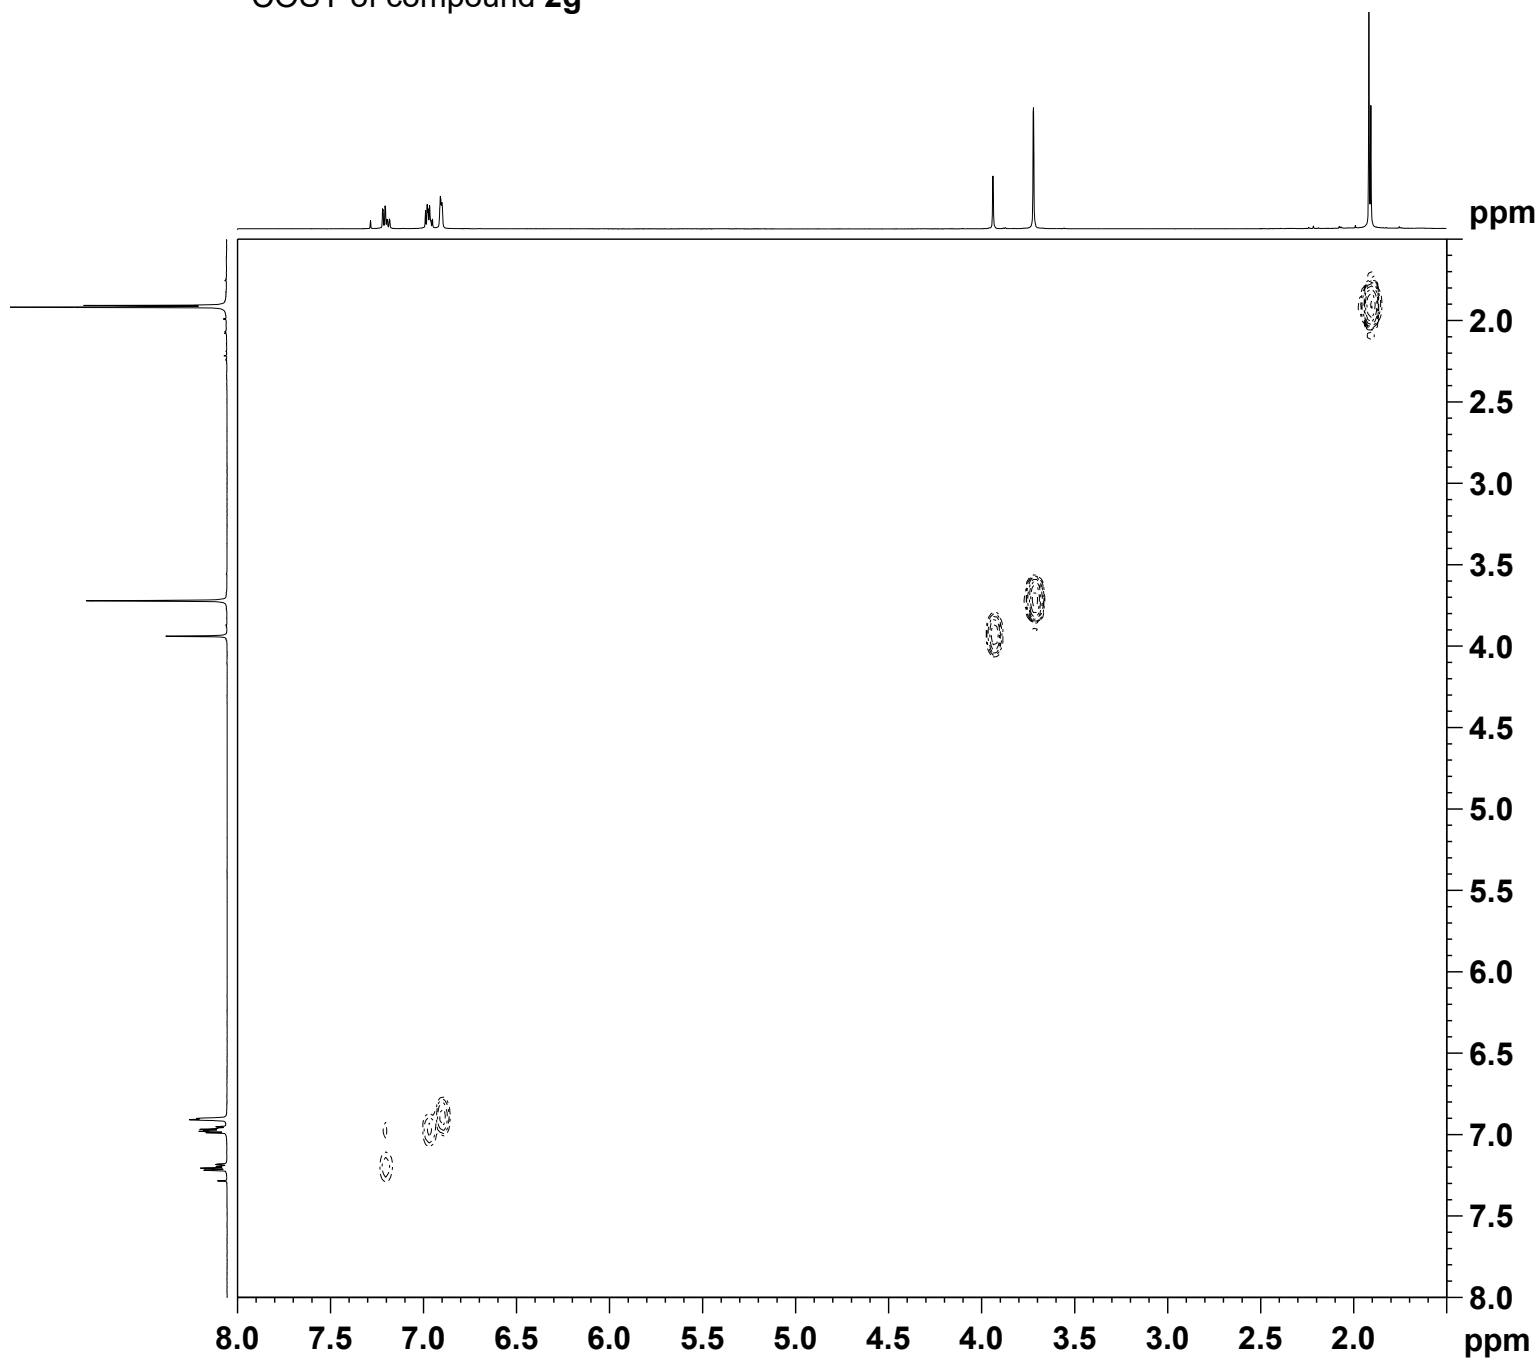

Current Data Parameters  
 NAME YYH-070  
 EXPNO 7  
 PROCNO 1

## F2 - Acquisition Parameters

Date\_ 20210419  
 Time\_ 17.04 h  
 INSTRUM spect  
 PROBHD Z108618 0922 (  
 PULPROG cosygpppqf  
 TD 2048  
 SOLVENT CDCl3  
 NS 4  
 DS 16  
 SWH 8012.820 Hz  
 FIDRES 7.825020 Hz  
 AQ 0.1277952 sec  
 RG 210.28  
 DW 62.400 usec  
 DE 6.50 usec  
 TE 296.2 K  
 D0 0.00000300 sec  
 D1 2.00000000 sec  
 D11 0.03000000 sec  
 D12 0.00002000 sec  
 D13 0.00000400 sec  
 D16 0.00020000 sec  
 IN0 0.00012480 sec  
 TDav 1  
 SFO1 400.1324008 MHz  
 NUC1 1H  
 P0 14.50 usec  
 P1 14.50 usec  
 P17 2500.00 usec  
 PLW1 12.69999981 W  
 PLW10 2.96690011 W  
 GPNAM[1] SMSQ10.100  
 GPZ1 10.00 %  
 P16 1000.00 usec

## F1 - Acquisition parameters

TD 256  
 SFO1 400.1324 MHz  
 FIDRES 62.600159 Hz  
 SW 20.025 ppm  
 FnmODE QF

## F2 - Processing parameters

SI 1024  
 SF 400.1300000 MHz  
 WDW QSINE  
 SSB 0  
 LB 0 Hz  
 GB 0  
 PC 1.40

## F1 - Processing parameters

SI 1024  
 MC2 QF  
 SF 400.1300000 MHz  
 WDW QSINE  
 SSB 0  
 LB 0 Hz  
 GB 0



NOESY of compound 2g

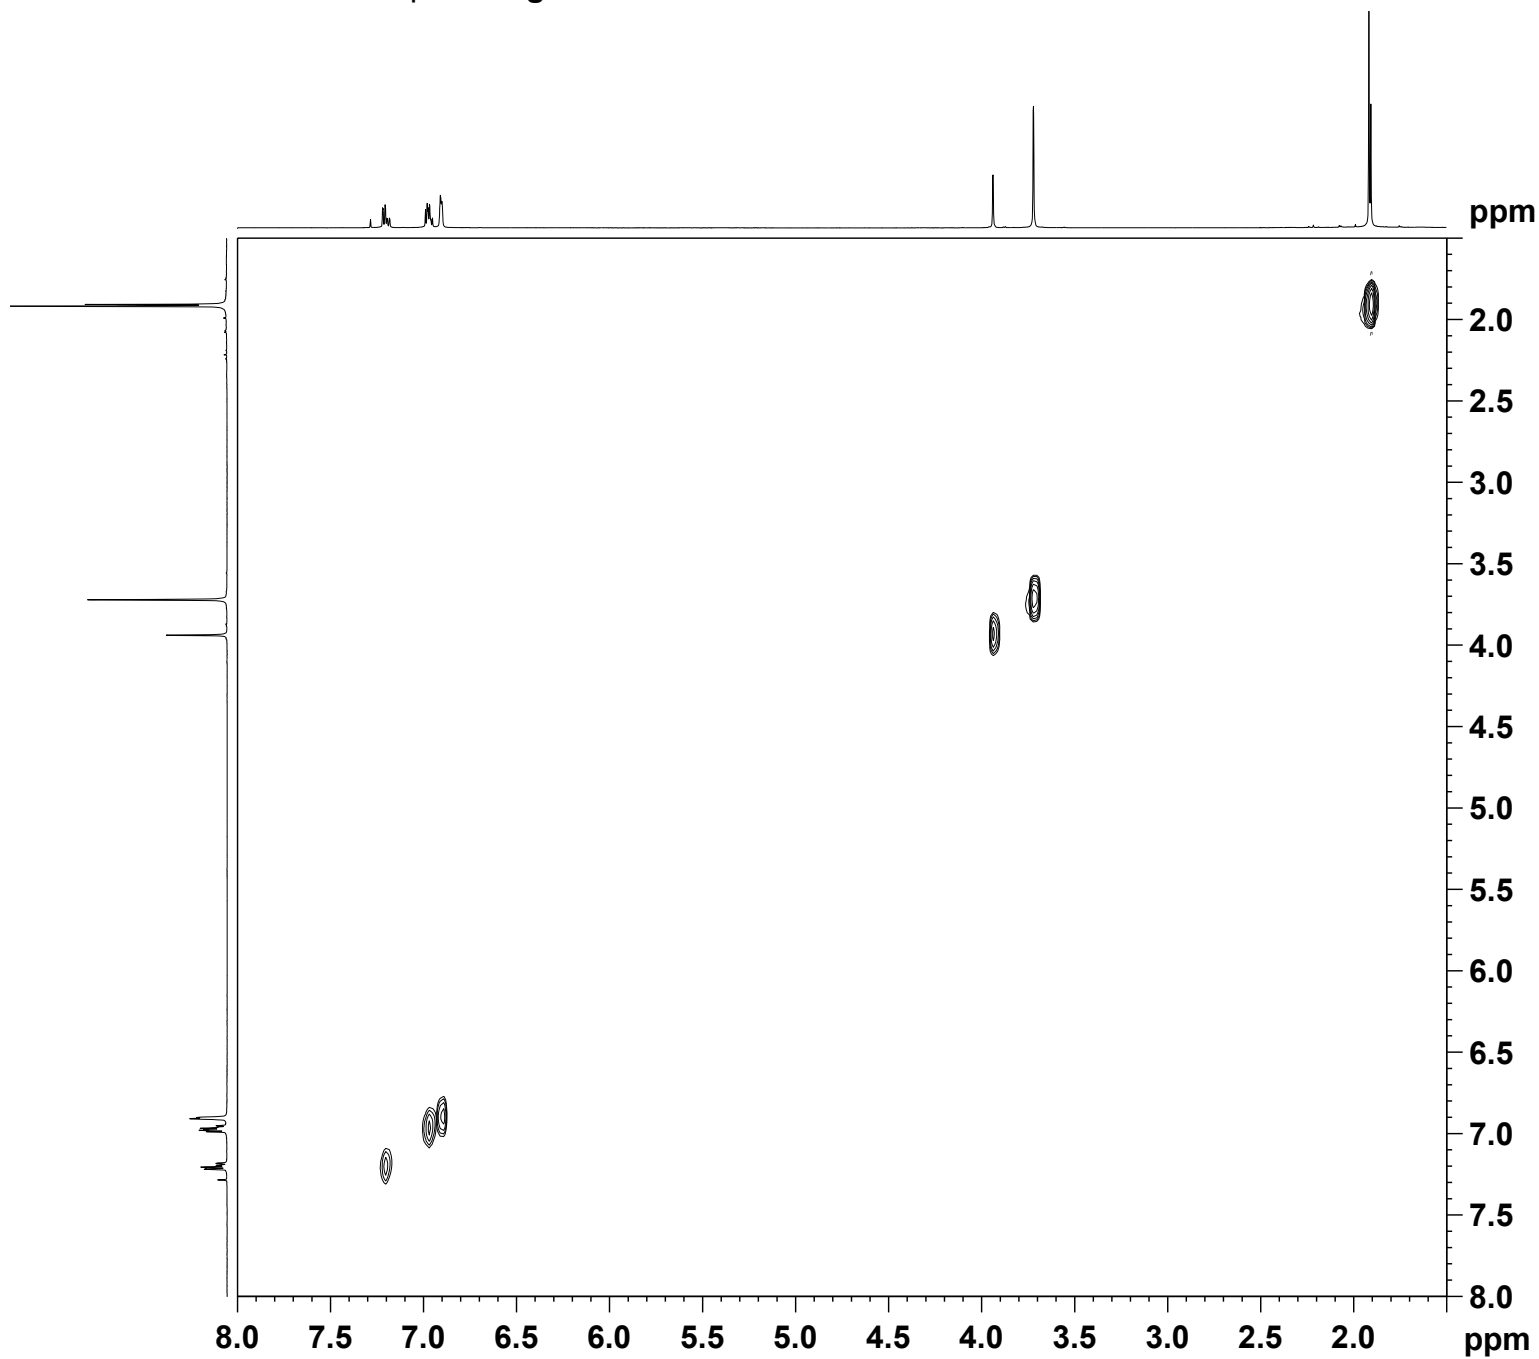

```

Current Data Parameters
NAME          YYH-070
EXPNO         8
PROCNO        1

F2 - Acquisition Parameters
Date_         20210419
Time          17.42 h
INSTRUM       spect
PROBHD        Z108618_0922 (
PULPROG       noesygpphpp
TD            2048
SOLVENT       CDCl3
NS            5
DS            16
SWH           8012.820 Hz
FIDRES        7.825020 Hz
AQ            0.1277952 sec
RG            112.98
DW            62.400 usec
DE            6.50 usec
TE            295.7 K
D0            0.00004394 sec
D1            2.00000000 sec
D8            0.40000001 sec
D11           0.03000000 sec
D12           0.00002000 sec
D16           0.00020000 sec
IN0           0.00012480 sec
TDav          1
SFO1          400.1324008 MHz
NUC1          1H
P1            14.50 usec
P2            29.00 usec
P17           2500.00 usec
PLW1          12.69999981 W
PLW10         2.96690011 W
GPNAM[1]      SMSQ10.100
GPZ1          40.00 %
P16           1000.00 usec

F1 - Acquisition parameters
TD            256
SFO1          400.1324 MHz
FIDRES        62.600159 Hz
SW            20.025 ppm
FnMODE        States-TPPI

F2 - Processing parameters
SI            1024
SF            400.1300000 MHz
WDW           QSINE
SSB           2
LB            0 Hz
GB            0
PC            1.40

F1 - Processing parameters
SI            1024
MC2           States-TPPI
SF            400.1300000 MHz
WDW           QSINE
SSB           2
LB            0 Hz
GB            0
    
```

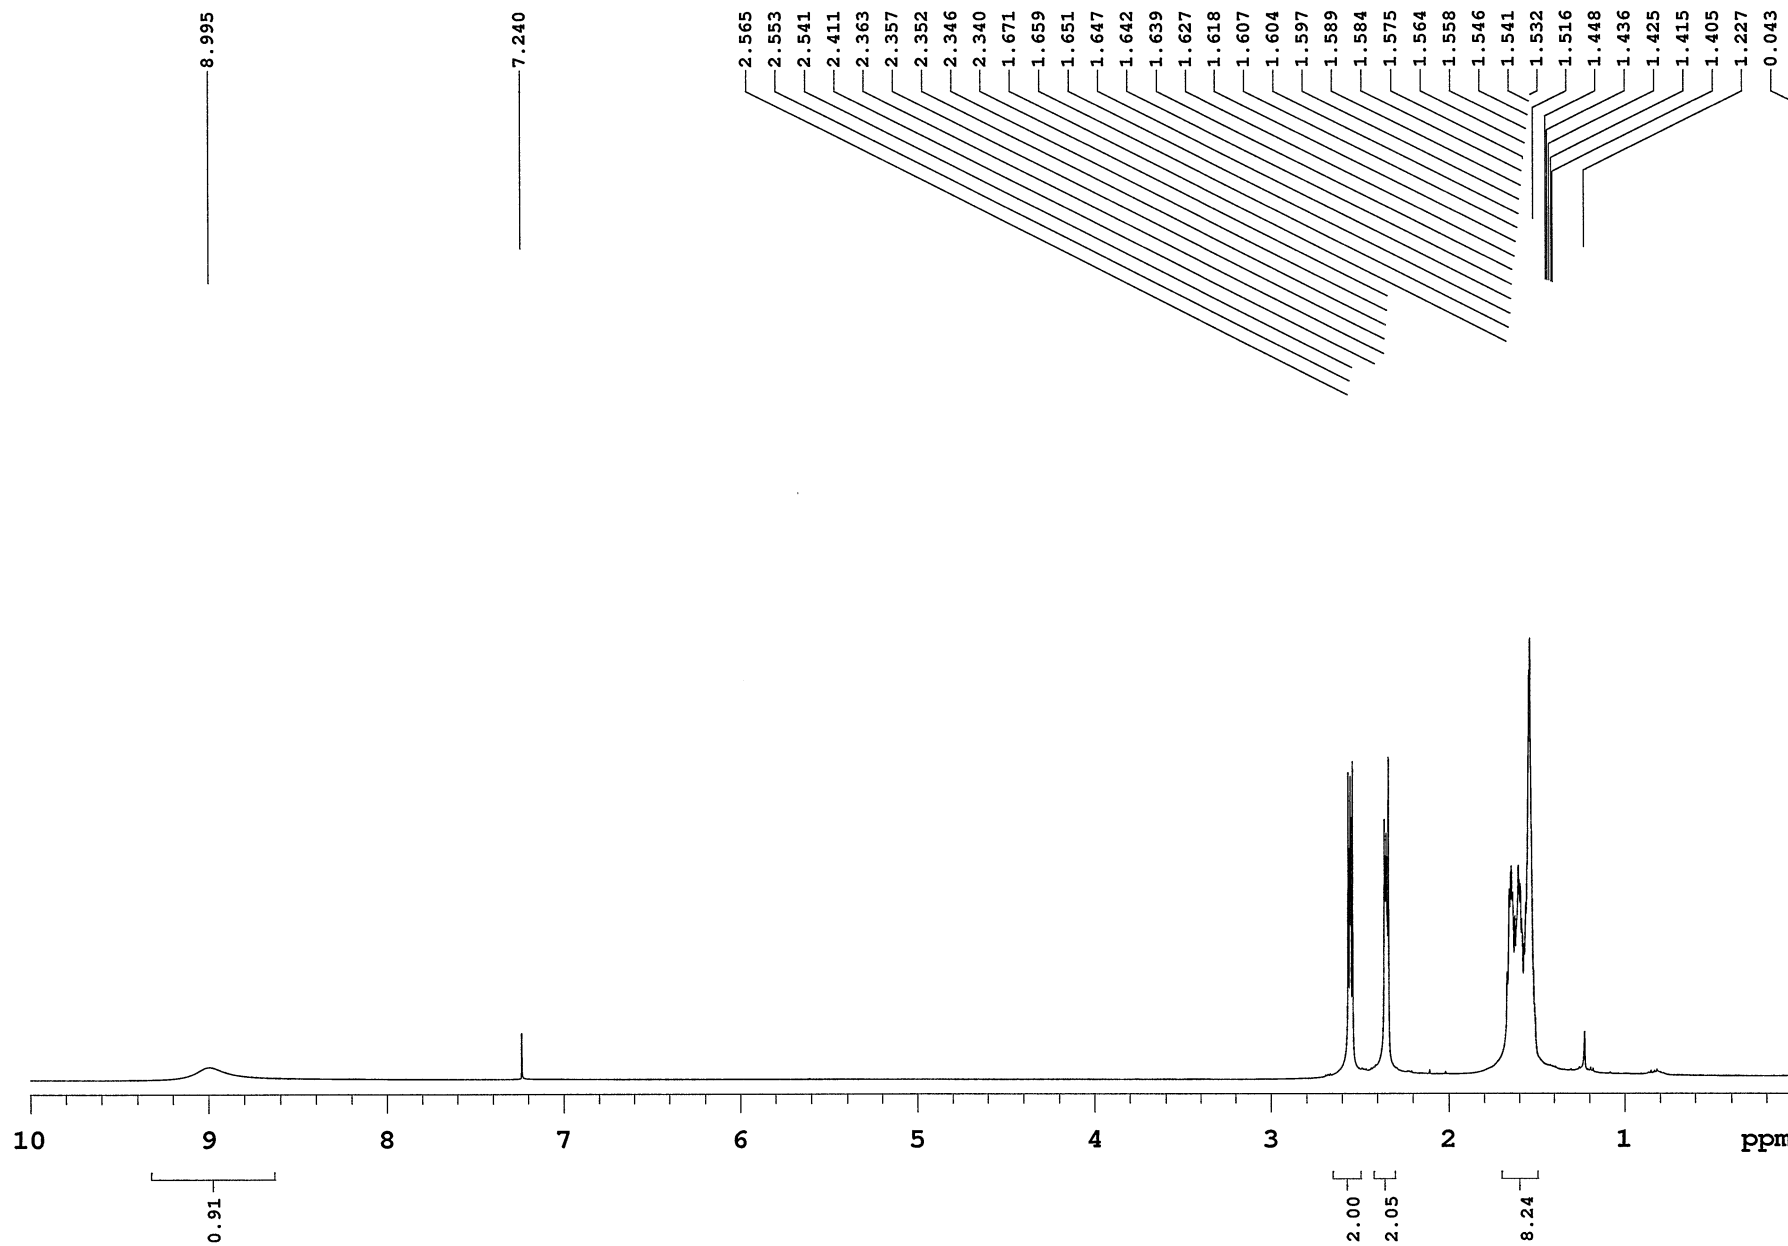1H NMR (CDCl<sub>3</sub>, 500 MHz) of compound 2h

YYH-071

S47

Sample Name **YYH-071**  
Date collected **2021-05-27**

Pulse sequence **CARBON**  
Solvent **cdcl3**

Temperature **25**  
Spectrometer **Agilent-NMR-inova500**

Study owner **vnmr2**  
Operator **vnmr2**

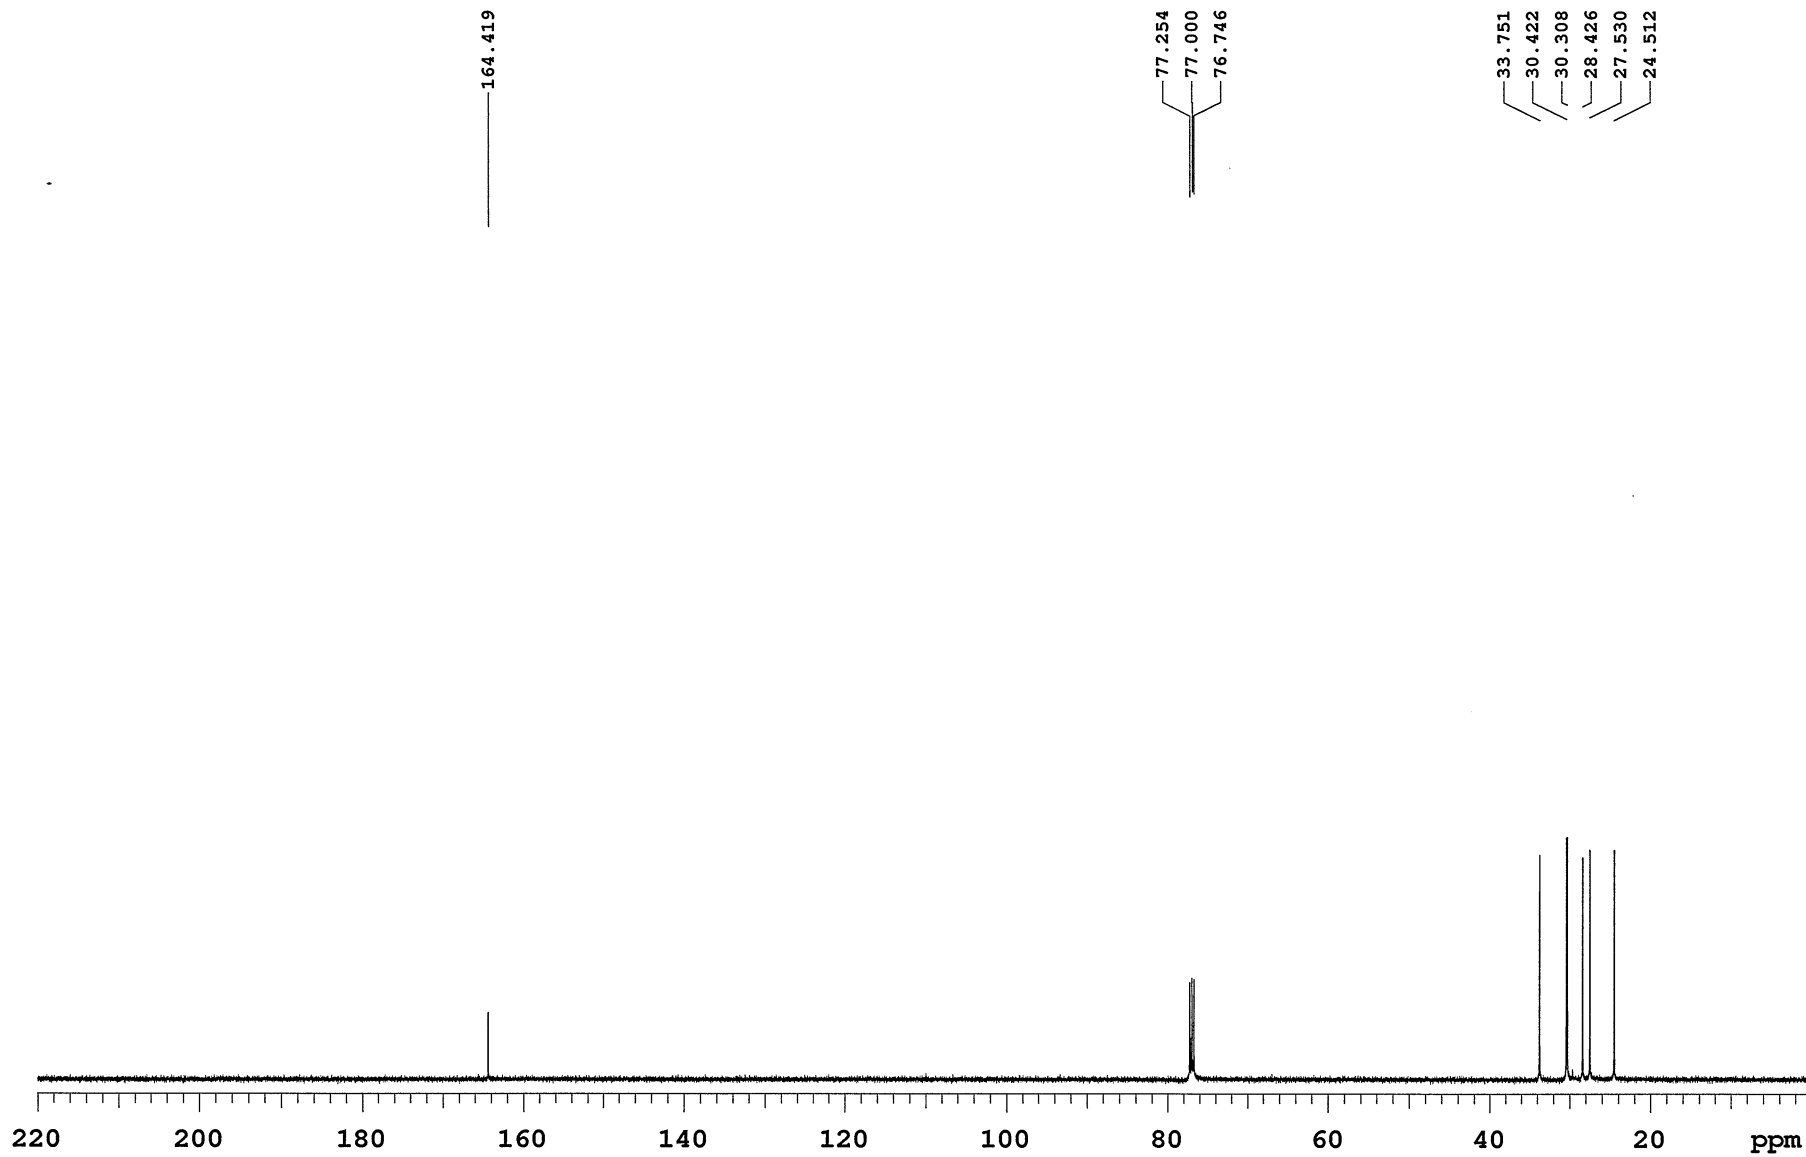

13C NMR (CDCl<sub>3</sub>, 125 MHz) of compound **2h**

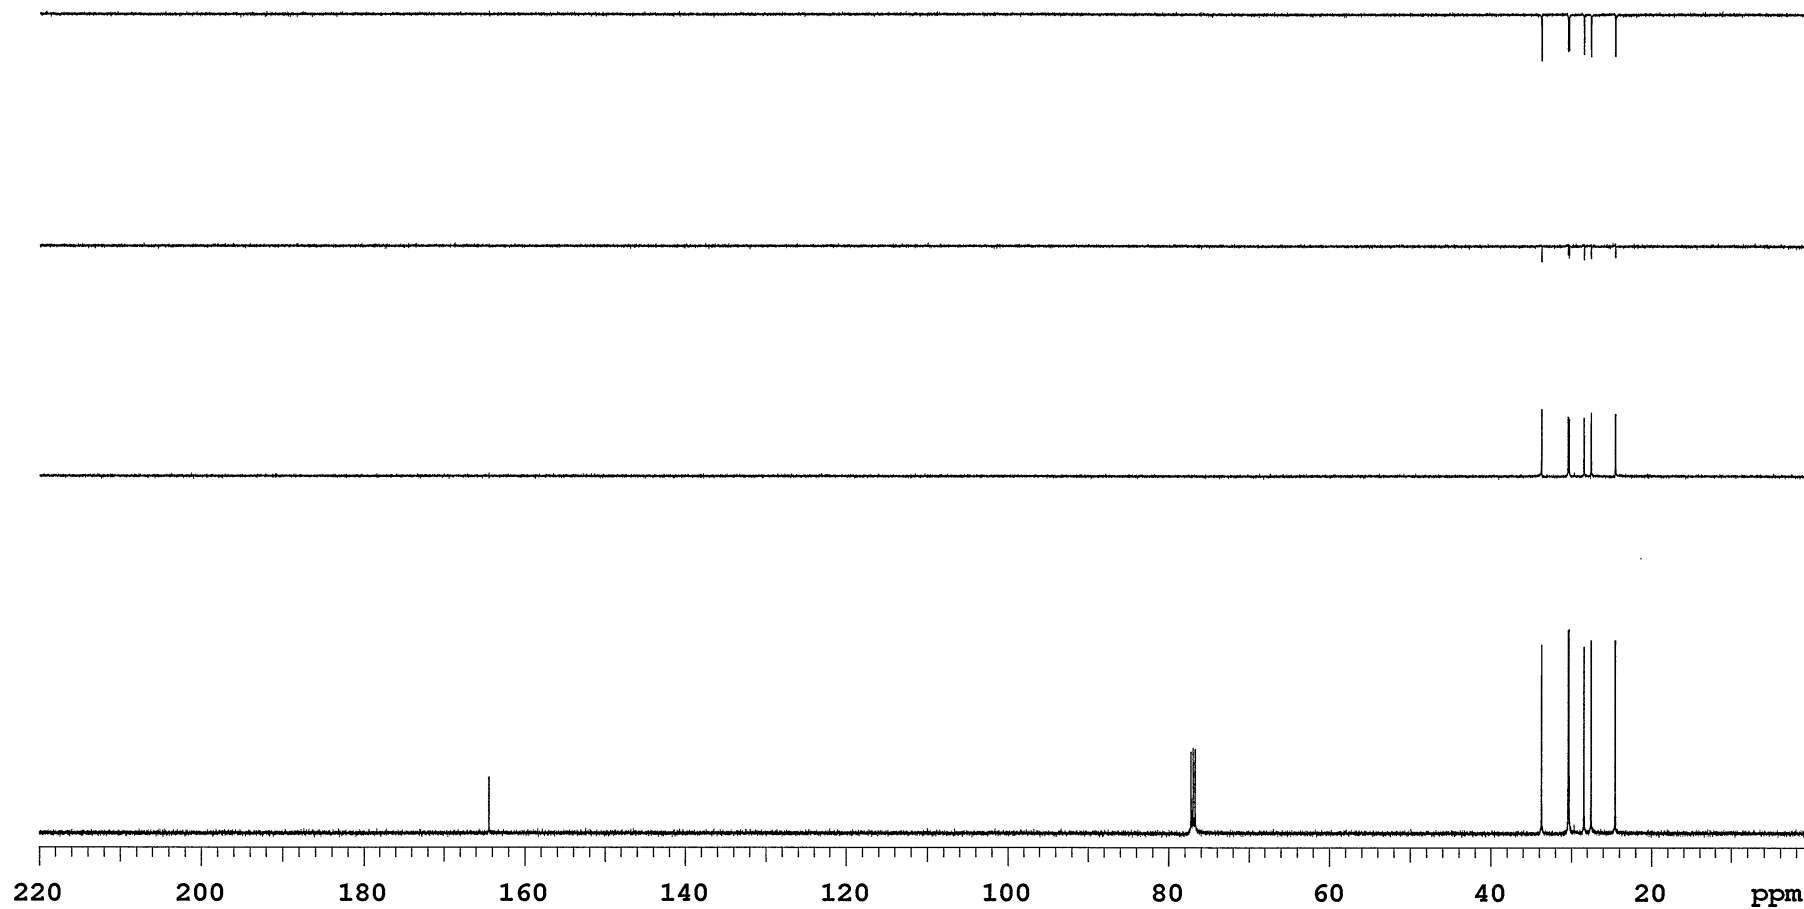DEPT of compound **2h**

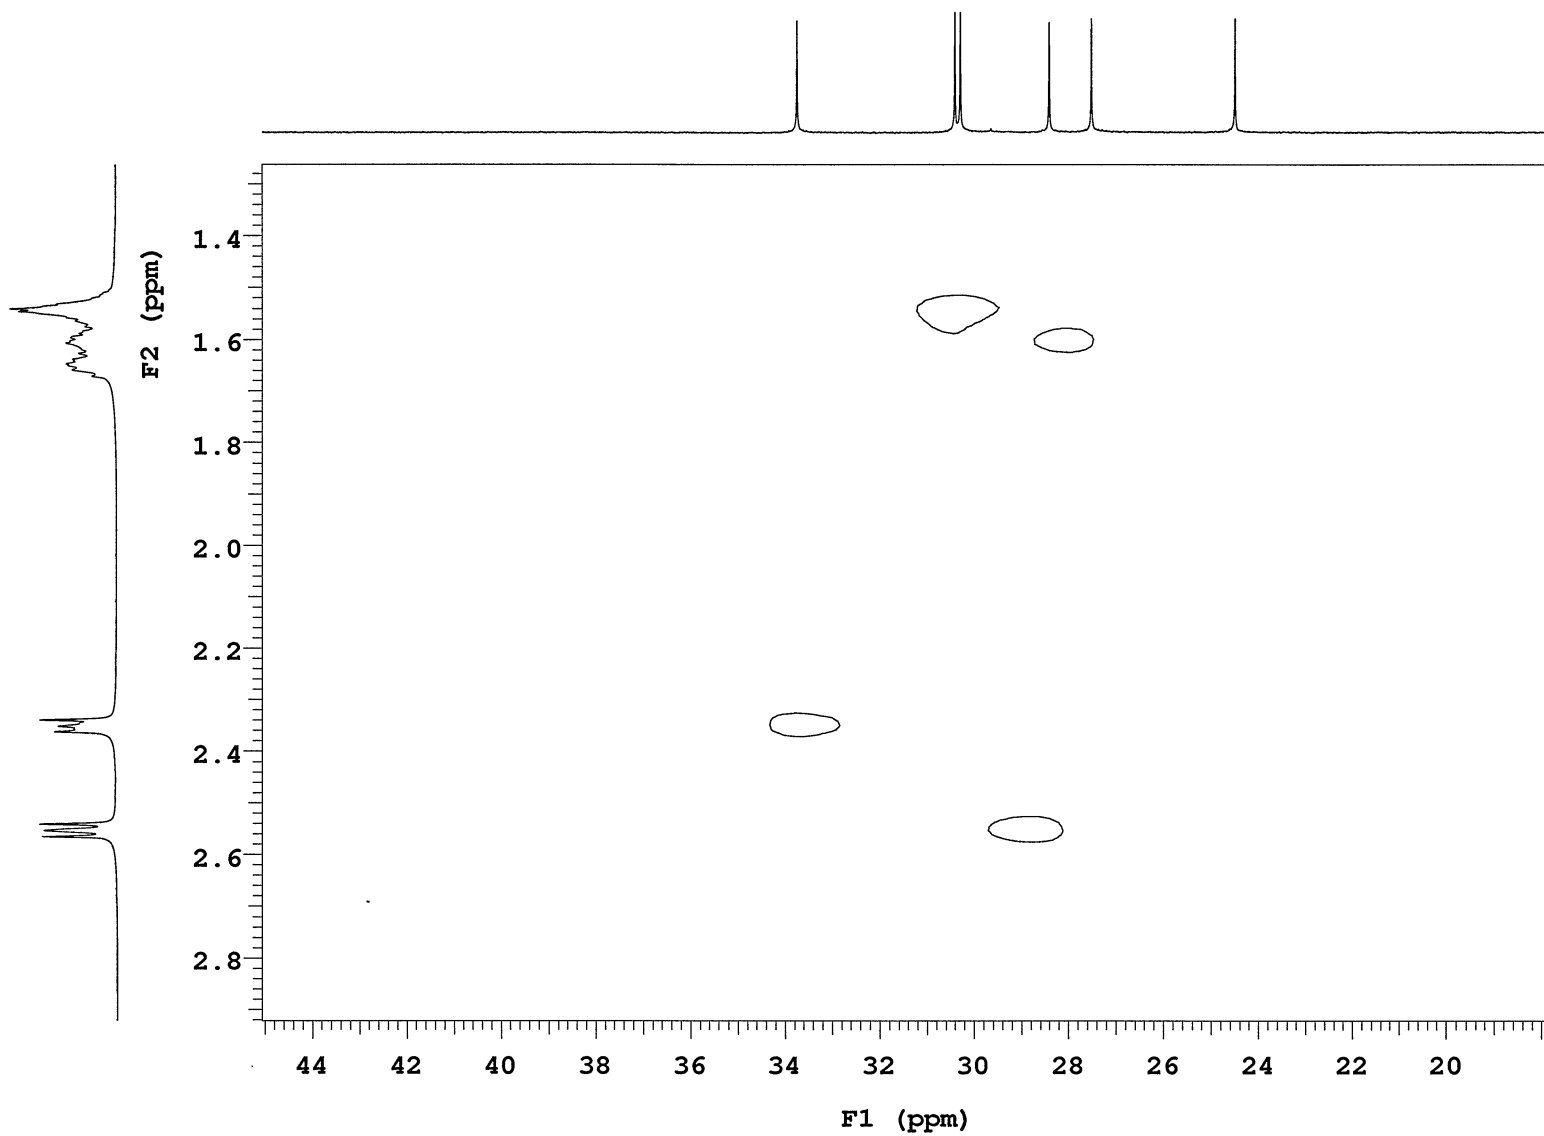

HSQC of compound 2h

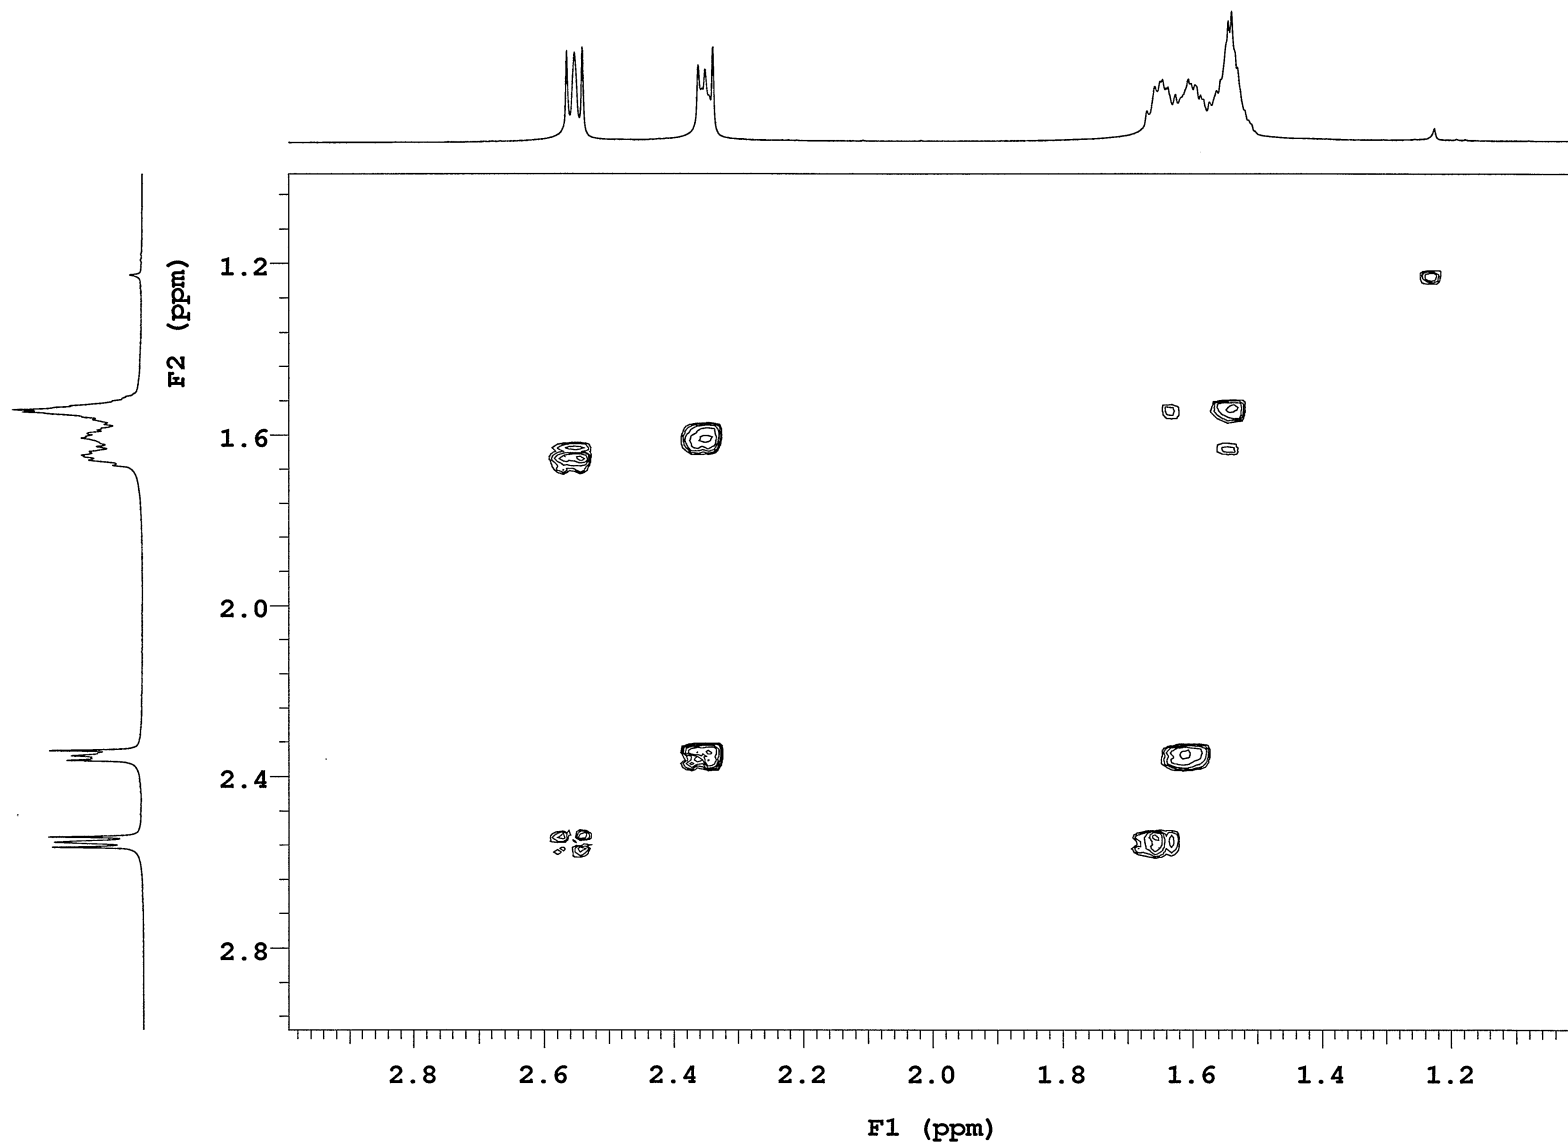COSY of compound **2h**

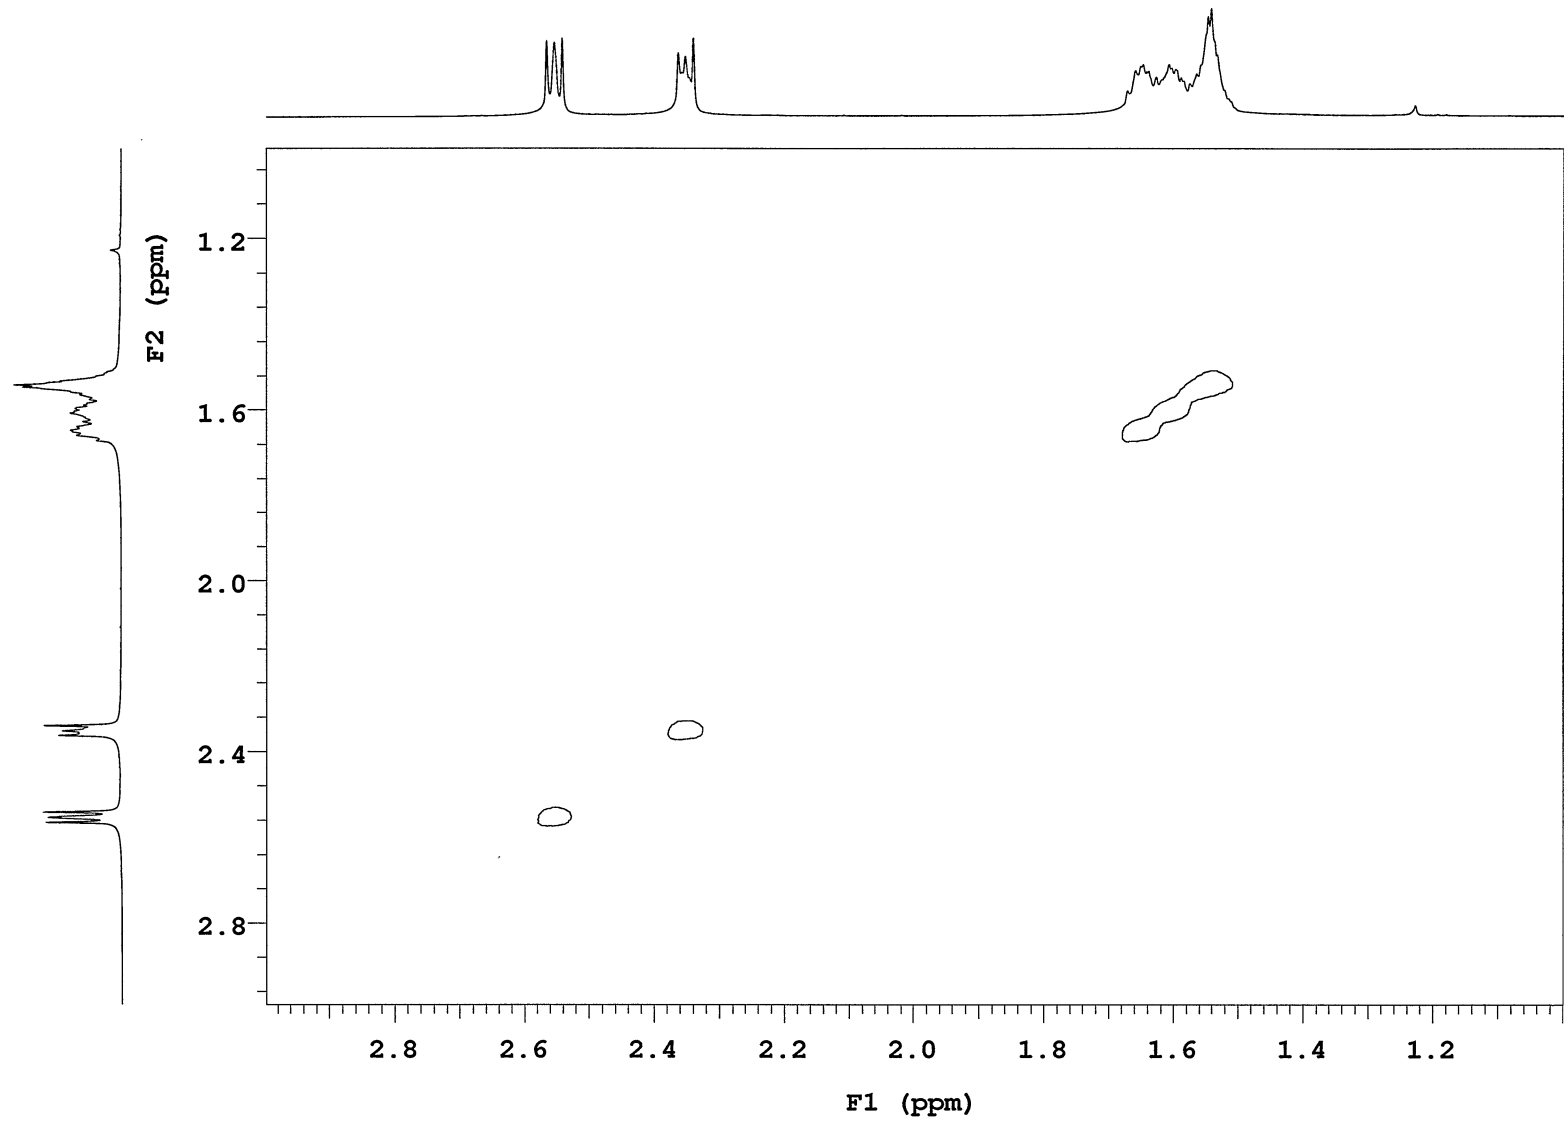NOESY of compound **2h**

1H NMR (CDCl3, 400 MHz) of compound 2i

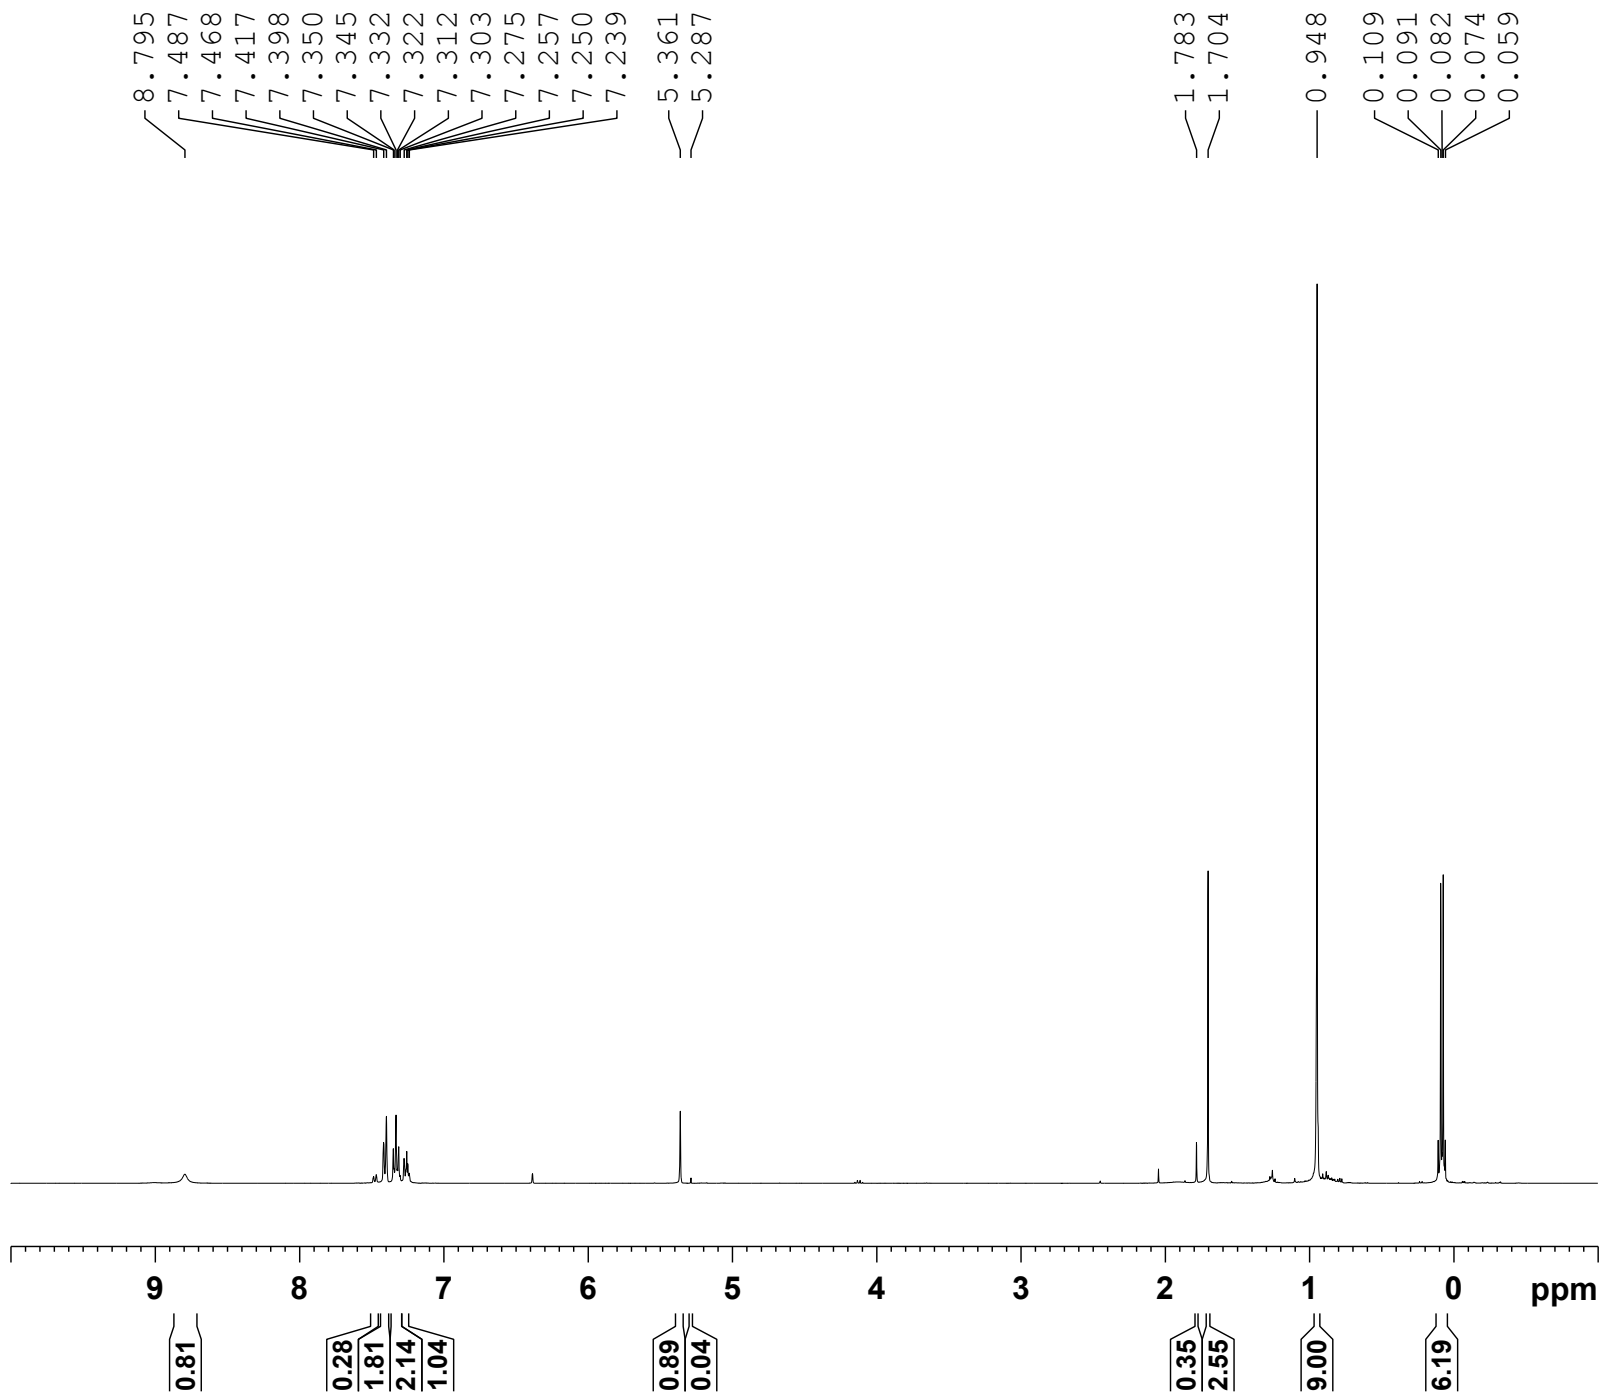

Current Data Parameters  
 NAME YYH-075  
 EXPNO 1  
 PROCNO 1

F2 - Acquisition Parameters  
 Date\_ 20210427  
 Time\_ 9.51 h  
 INSTRUM spect  
 PROBHD z108618\_0922 (  
 PULPROG zg30  
 TD 32768  
 SOLVENT CDCl3  
 NS 8  
 DS 0  
 SWH 8012.820 Hz  
 FIDRES 0.489064 Hz  
 AQ 2.0447233 sec  
 RG 63.35  
 DW 62.400 usec  
 DE 16.43 usec  
 TE 295.9 K  
 D1 2.00000000 sec  
 TD0 1  
 SFO1 400.1324008 MHz  
 NUC1 1H  
 P1 14.50 usec  
 PLW1 12.69999981 W

F2 - Processing parameters  
 SI 16384  
 SF 400.1300137 MHz  
 WDW EM  
 SSB 0  
 LB 0 Hz  
 GB 0  
 PC 1.00



13C NMR (CDCl3, 100 MHz) of compound 2i

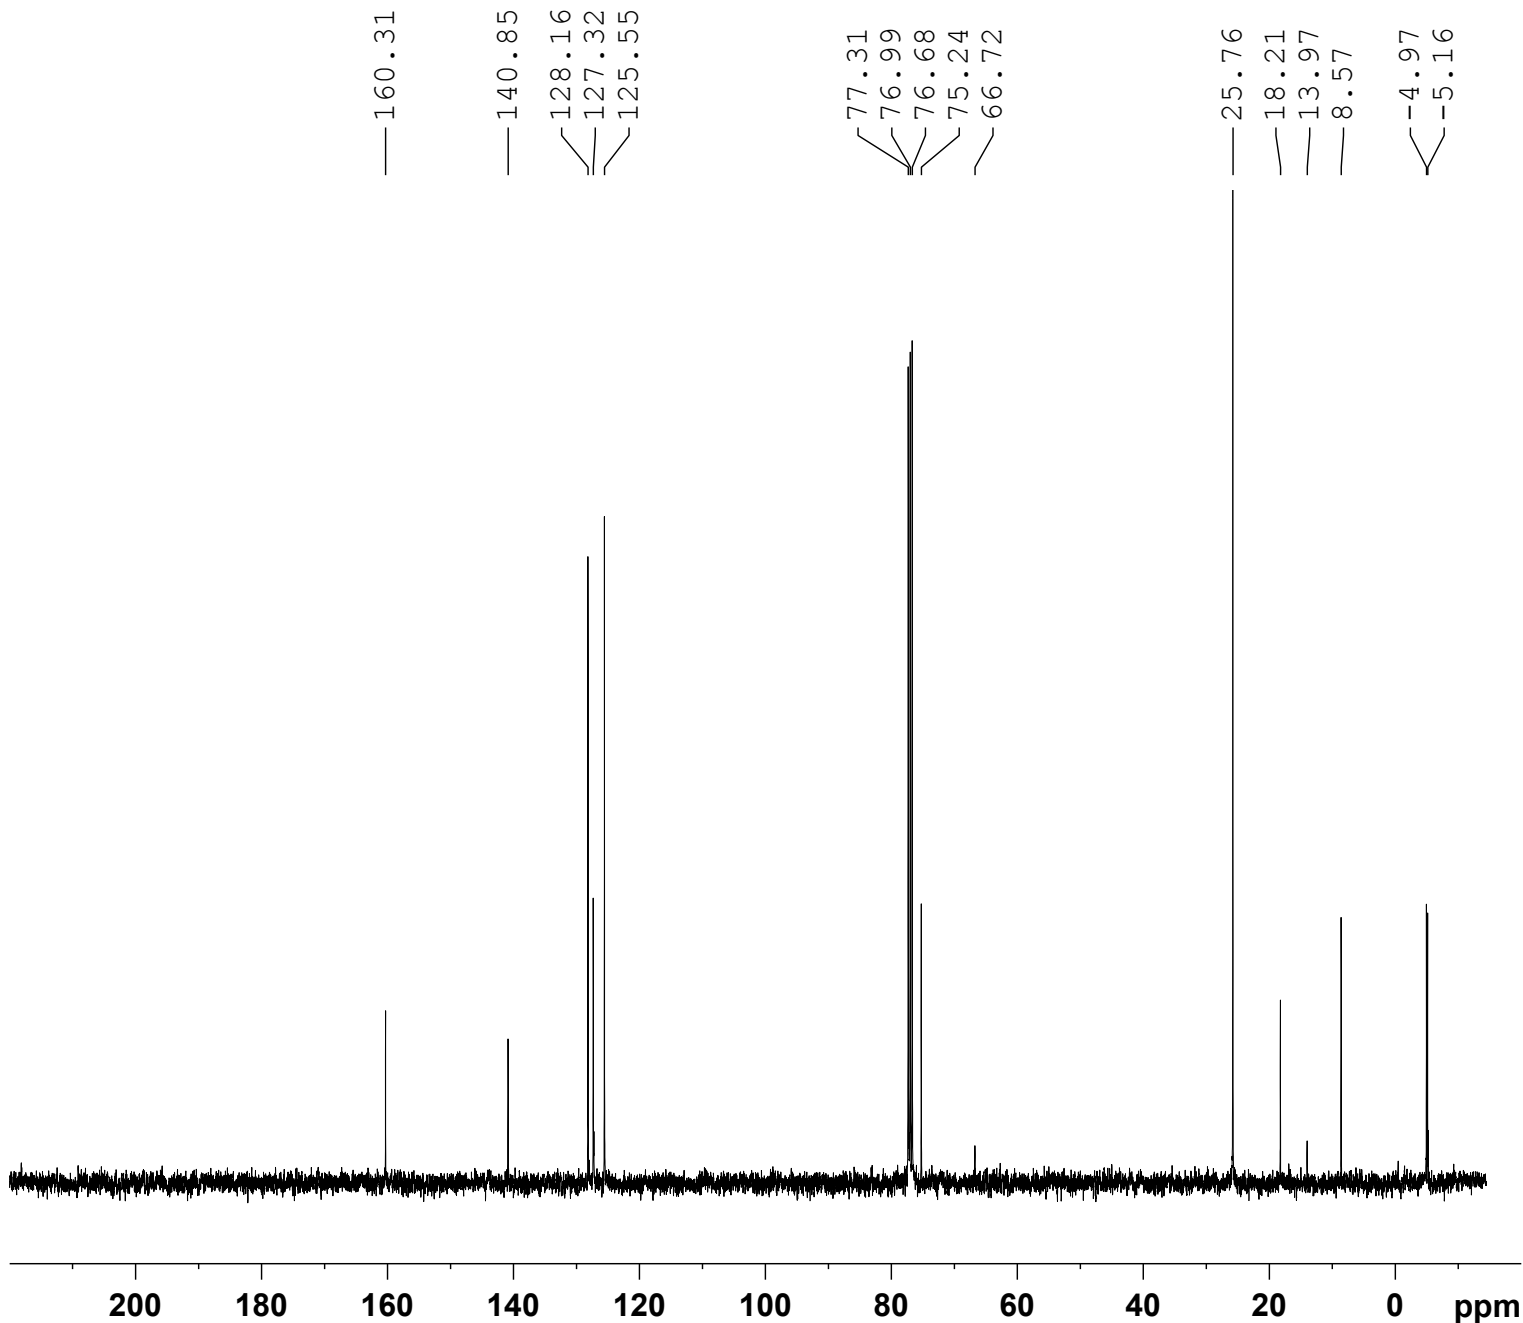

Current Data Parameters  
 NAME YYH-075  
 EXPNO 2  
 PROCNO 1

F2 - Acquisition Parameters  
 Date\_ 20210427  
 Time\_ 10.04 h  
 INSTRUM spect  
 PROBHD z108618\_0922 (  
 PULPROG zgpg30  
 TD 32768  
 SOLVENT CDCl3  
 NS 64  
 DS 0  
 SWH 24038.461 Hz  
 FIDRES 1.467191 Hz  
 AQ 0.6815744 sec  
 RG 210.28  
 DW 20.800 usec  
 DE 6.50 usec  
 TE 296.8 K  
 D1 2.00000000 sec  
 D11 0.03000000 sec  
 TD0 1  
 SFO1 100.6233329 MHz  
 NUC1 13C  
 P1 10.50 usec  
 PLW1 44.09999847 W  
 SFO2 400.1316005 MHz  
 NUC2 1H  
 CPDPRG[2] bi\_waltz65 256  
 PCPD2 90.00 usec  
 PLW2 14.30000019 W  
 PLW12 0.37118000 W  
 PLW13 0.18640999 W

F2 - Processing parameters  
 SI 32768  
 SF 100.6127731 MHz  
 WDW EM  
 SSB 0  
 LB 2.00 Hz  
 GB 0  
 PC 1.00

DEPT of compound 2i

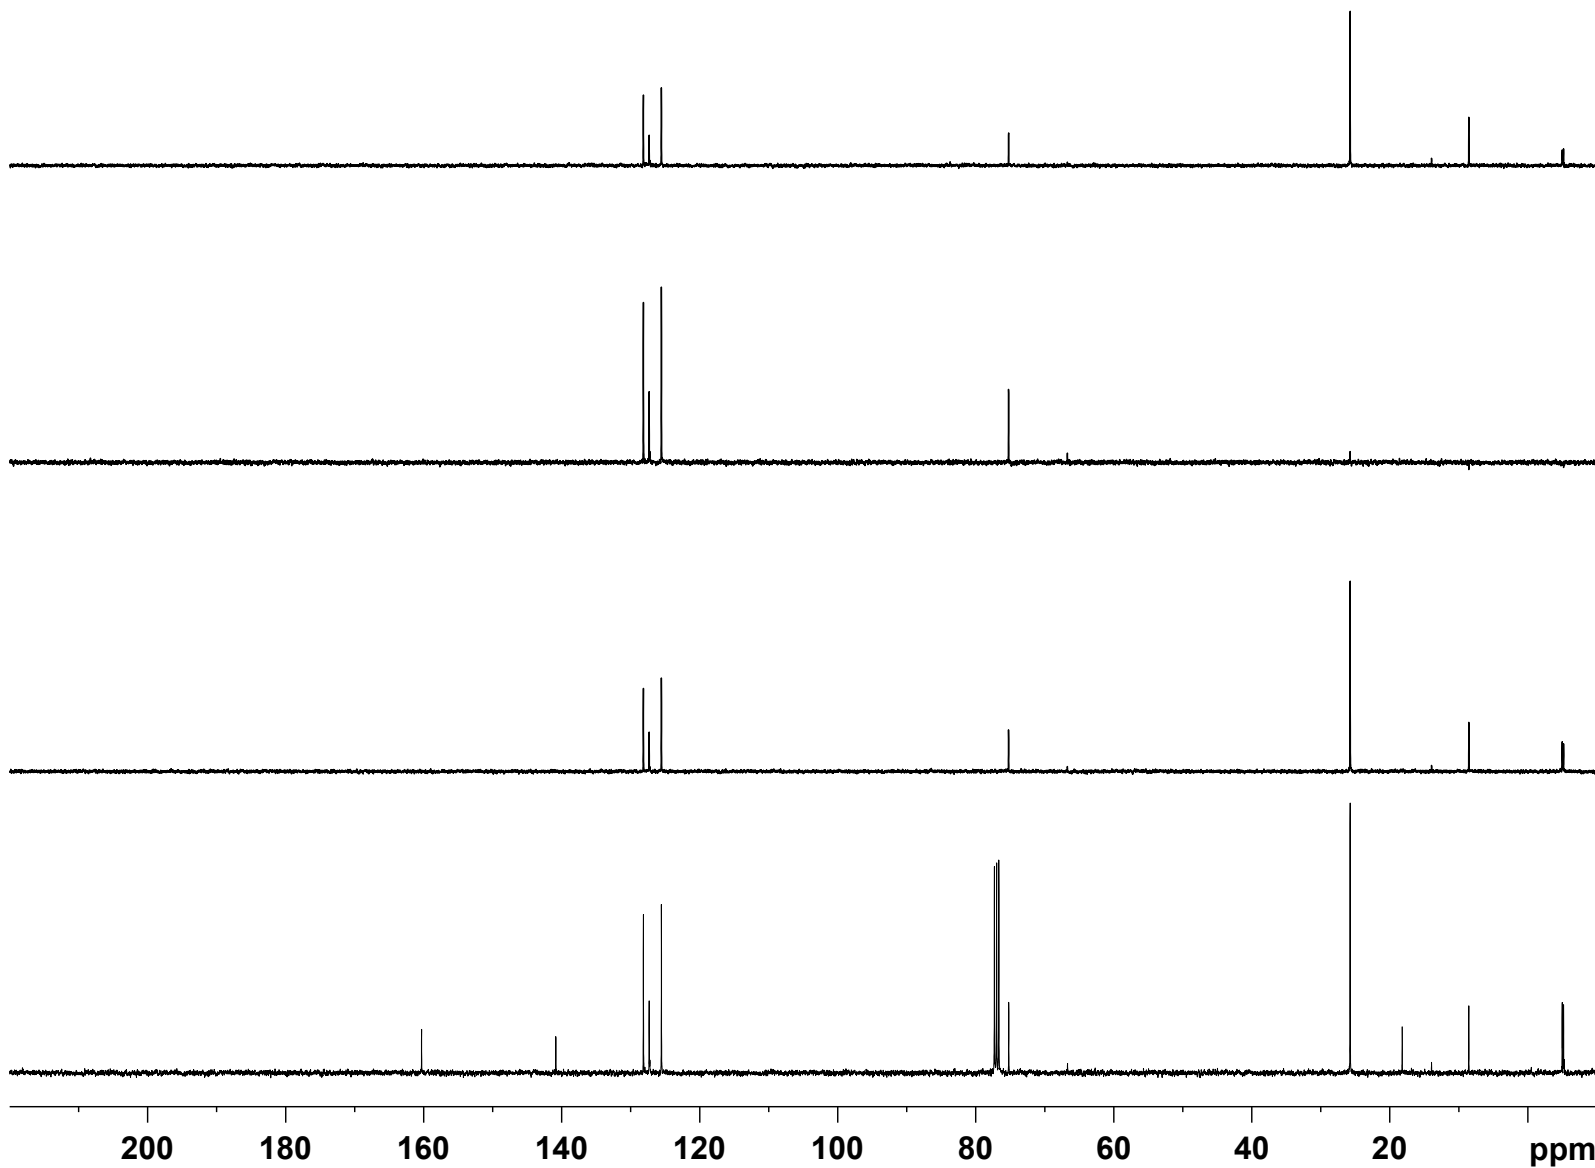

```

Current Data Parameters
NAME          YYH-075
EXPNO         2
PROCNO        1

F2 - Acquisition Parameters
Date_         20210427
Time          10.04 h
INSTRUM       spect
PROBHD        Z108618_0922 (
PULPROG       zgpg30
TD            32768
SOLVENT       CDC13
NS            64
DS            0
SWH           24038.461 Hz
FIDRES        1.467191 Hz
AQ            0.6815744 sec
RG            210.28
DW            20.800 usec
DE            6.50 usec
TE            296.8 K
D1            2.00000000 sec
D11           0.03000000 sec
TD0           1
SFO1          100.6233329 MHz
NUC1          13C
P1            10.50 usec
PLW1          44.09999847 W
SFO2          400.1316005 MHz
NUC2          1H
CPDPRG[2     bi_waltz65_256
PCPD2         90.00 usec
PLW2          14.30000019 W
PLW12         0.37118000 W
PLW13         0.18640999 W

F2 - Processing parameters
SI            32768
SF            100.6127736 MHz
WDW           EM
SSB           0
LB            2.00 Hz
GB            0
PC            1.00
    
```

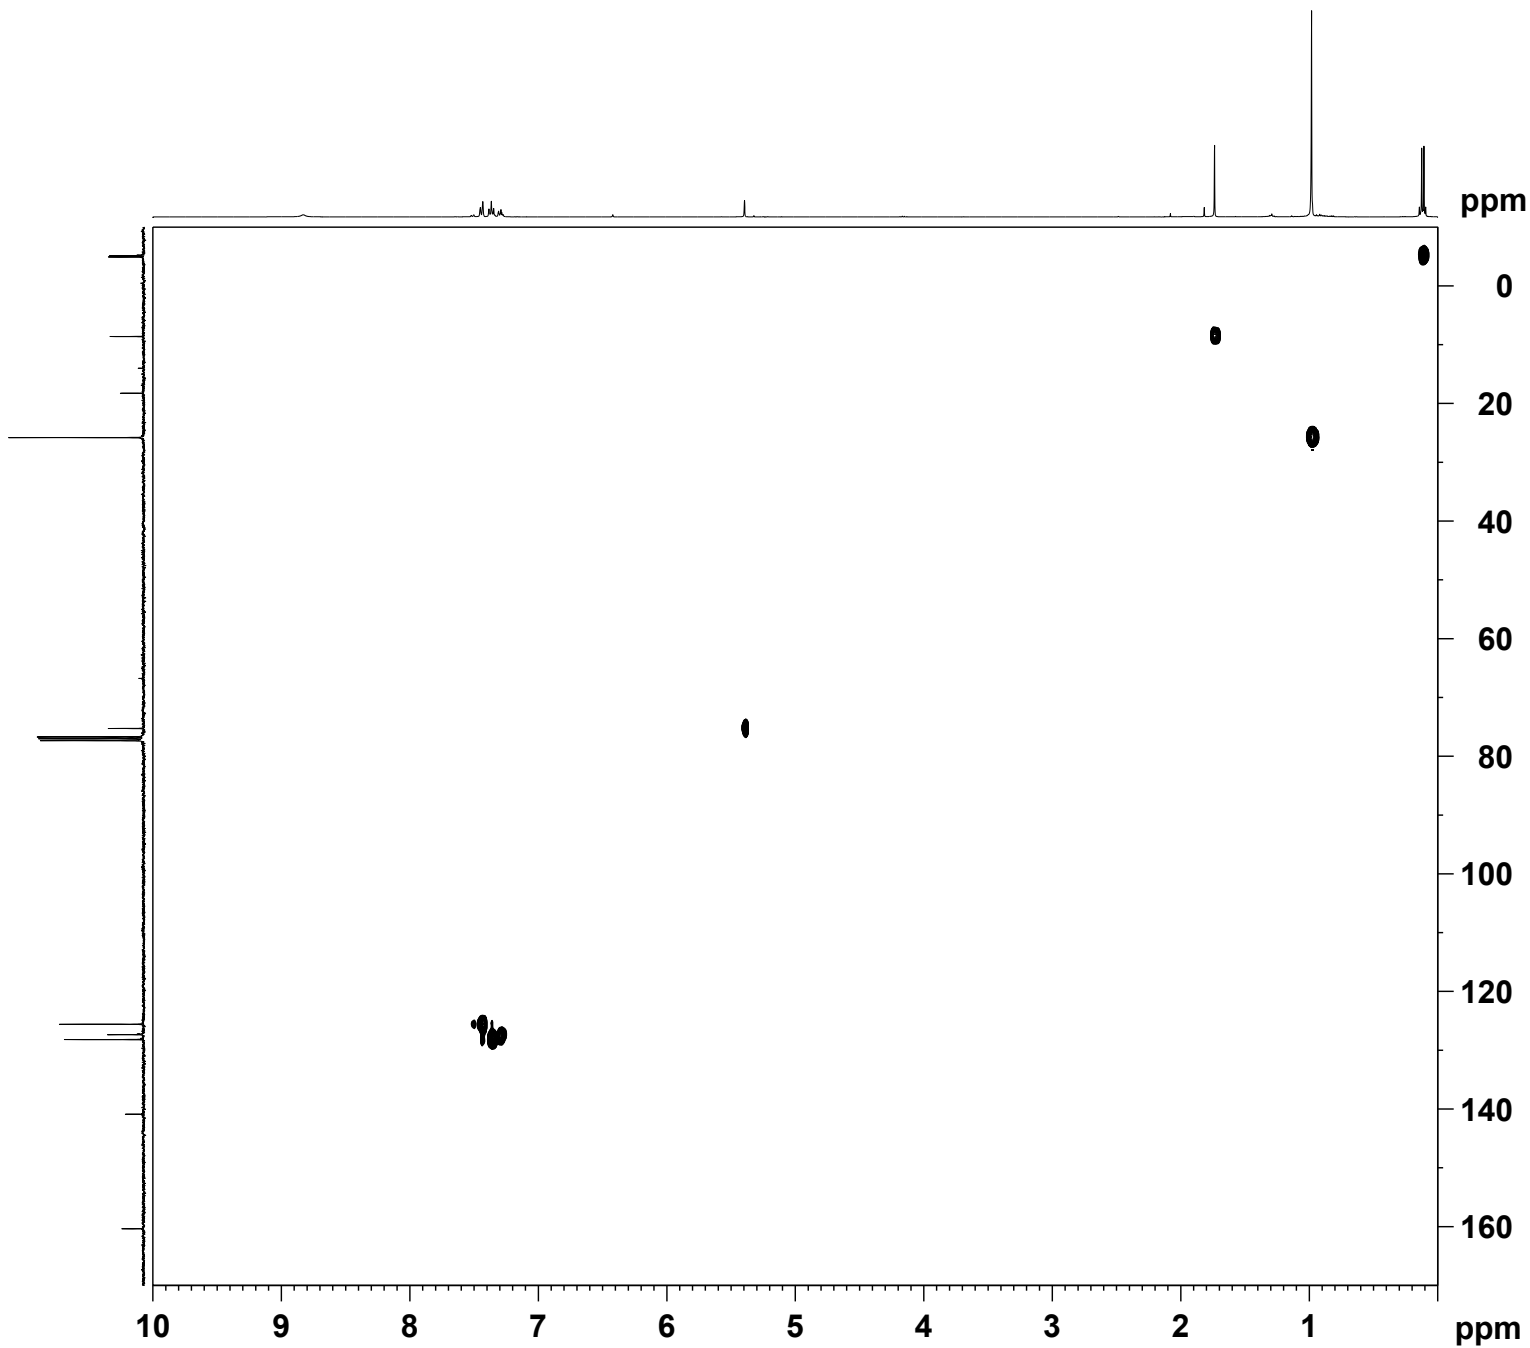

```

Current Data Parameters
NAME          YYH-075
EXPNO         6
PROCNO        1

F2 - Acquisition Parameters
Date_         20210427
Time          18.42 h
INSTRUM       spect
PROBHD        Z108618_0922 (
PULPROG       hsqcetgpsisp2.2
TD            2048
SOLVENT       CDCl3
NS            6
DS            16
SWH           8012.820 Hz
FIDRES        7.825020 Hz
AQ            0.1277952 sec
RG            210.28
DW            62.400 usec
DE            6.50 usec
TE            296.0 K
CNST2         145.0000000
CNST17        -0.5000000
D0            0.00000300 sec
D1            1.50000000 sec
D4            0.00172414 sec
D11           0.03000000 sec
D16           0.00020000 sec
D24           0.00086207 sec
IN0           0.00002080 sec
TDav          1
SFO1          400.1324008 MHz
NUC1          1H
P1            14.50 usec
P2            29.00 usec
P28           1000.00 usec
PLW1          12.69999981 W
SFO2          100.6233329 MHz
NUC2          13C
CPDPRG[2]    garp
P3            10.50 usec
P14           500.00 usec
P24           2000.00 usec
PCPD2         80.00 usec
PLW0          0 W
PLW2          44.00000000 W
PLW12         0.75796998 W
SPNAM[3]      Crp60,0.5,20.1
SFOAL3        0.500
SPOFFS3       0 Hz
SPW3          7.41179991 W
SPNAM[7]      Crp60comp.4
SFOAL7        0.500
SPOFFS7       0 Hz
SPW7          7.41179991 W
GPNAM[1]      SMSQ10.100
GPZ1          80.00 %
GPNAM[2]      SMSQ10.100
GPZ2          20.10 %
GPNAM[3]      SMSQ10.100
GPZ3          11.00 %
GPNAM[4]      SMSQ10.100
GPZ4          -5.00 %
P16           1000.00 usec
P19           600.00 usec

F1 - Acquisition parameters
TD            256
SFO1          100.6233 MHz
FIDRES        187.800476 Hz
SW            238.896 ppm
FnMODE        Echo-Antiecho

F2 - Processing parameters
SI            1024
SF            400.1300000 MHz
WDW           QSINE
SSB           2
LB            0 Hz
GB            0
PC            1.40

F1 - Processing parameters
SI            1024
MC2           echo-antiecho
SF            100.6127685 MHz
WDW           QSINE
SSB           2
LB            0 Hz
GB            0
    
```

## COSY of compound 2i

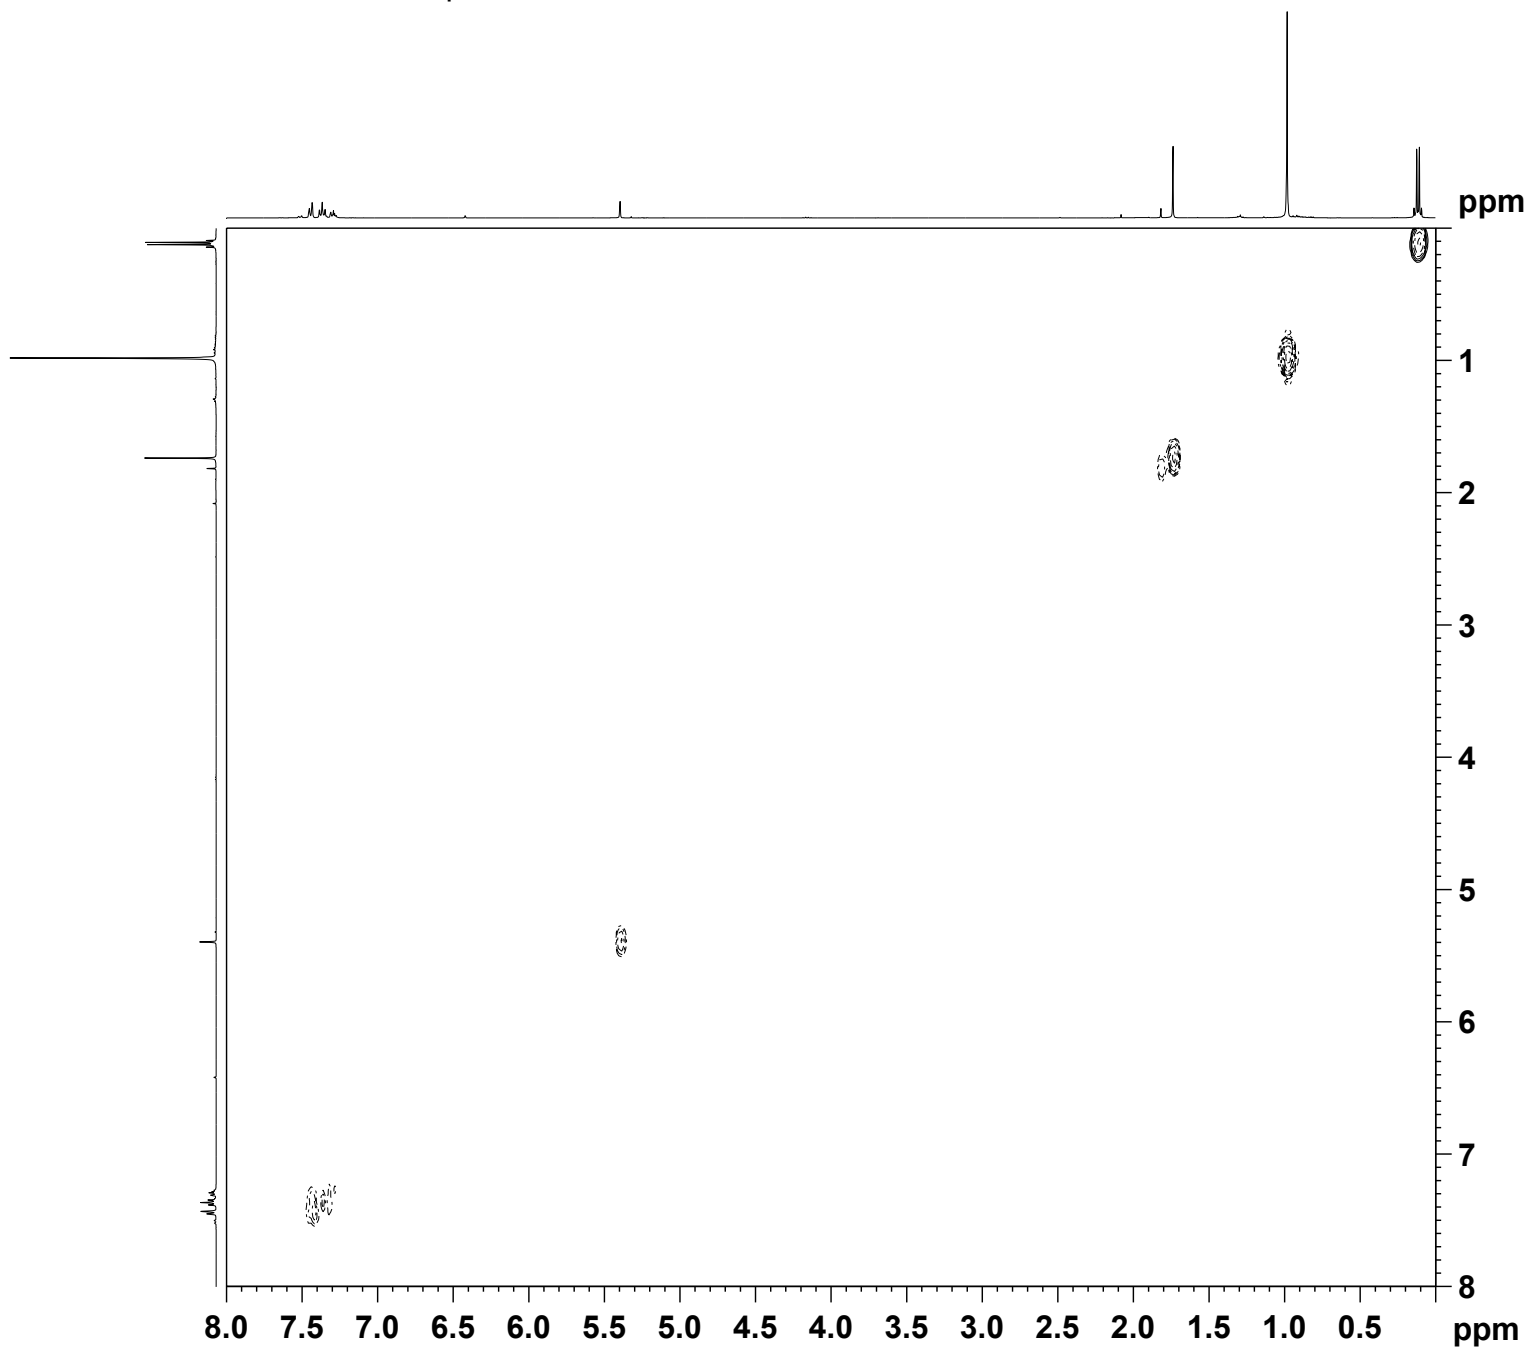

Current Data Parameters  
 NAME YYH-075  
 EXPNO 7  
 PROCNO 1

## F2 - Acquisition Parameters

Date\_ 20210503  
 Time\_ 20.02 h  
 INSTRUM spect  
 PROBHD Z108618 0922 (  
 PULPROG cosygpppqf  
 TD 2048  
 SOLVENT CDCl3  
 NS 6  
 DS 16  
 SWH 8012.820 Hz  
 FIDRES 7.825020 Hz  
 AQ 0.1277952 sec  
 RG 63.35  
 DW 62.400 usec  
 DE 6.50 usec  
 TE 295.9 K  
 D0 0.00000300 sec  
 D1 2.00000000 sec  
 D11 0.03000000 sec  
 D12 0.00002000 sec  
 D13 0.00000400 sec  
 D16 0.00020000 sec  
 IN0 0.00012480 sec  
 T<sub>Dav</sub> 1  
 SFO1 400.1324008 MHz  
 NUC1 1H  
 P0 14.50 usec  
 P1 14.50 usec  
 P17 2500.00 usec  
 PLW1 12.69999981 W  
 PLW10 2.96690011 W  
 GPNAM[1] SMSQ10.100  
 GPZ1 10.00 %  
 P16 1000.00 usec

## F1 - Acquisition parameters

TD 256  
 SFO1 400.1324 MHz  
 FIDRES 62.600159 Hz  
 SW 20.025 ppm  
 FnMODE QF

## F2 - Processing parameters

SI 1024  
 SF 400.1300000 MHz  
 WDW QSINE  
 SSB 0  
 LB 0 Hz  
 GB 0  
 PC 1.40

## F1 - Processing parameters

SI 1024  
 MC2 QF  
 SF 400.1300000 MHz  
 WDW QSINE  
 SSB 0  
 LB 0 Hz  
 GB 0

## NOESY of compound 2i

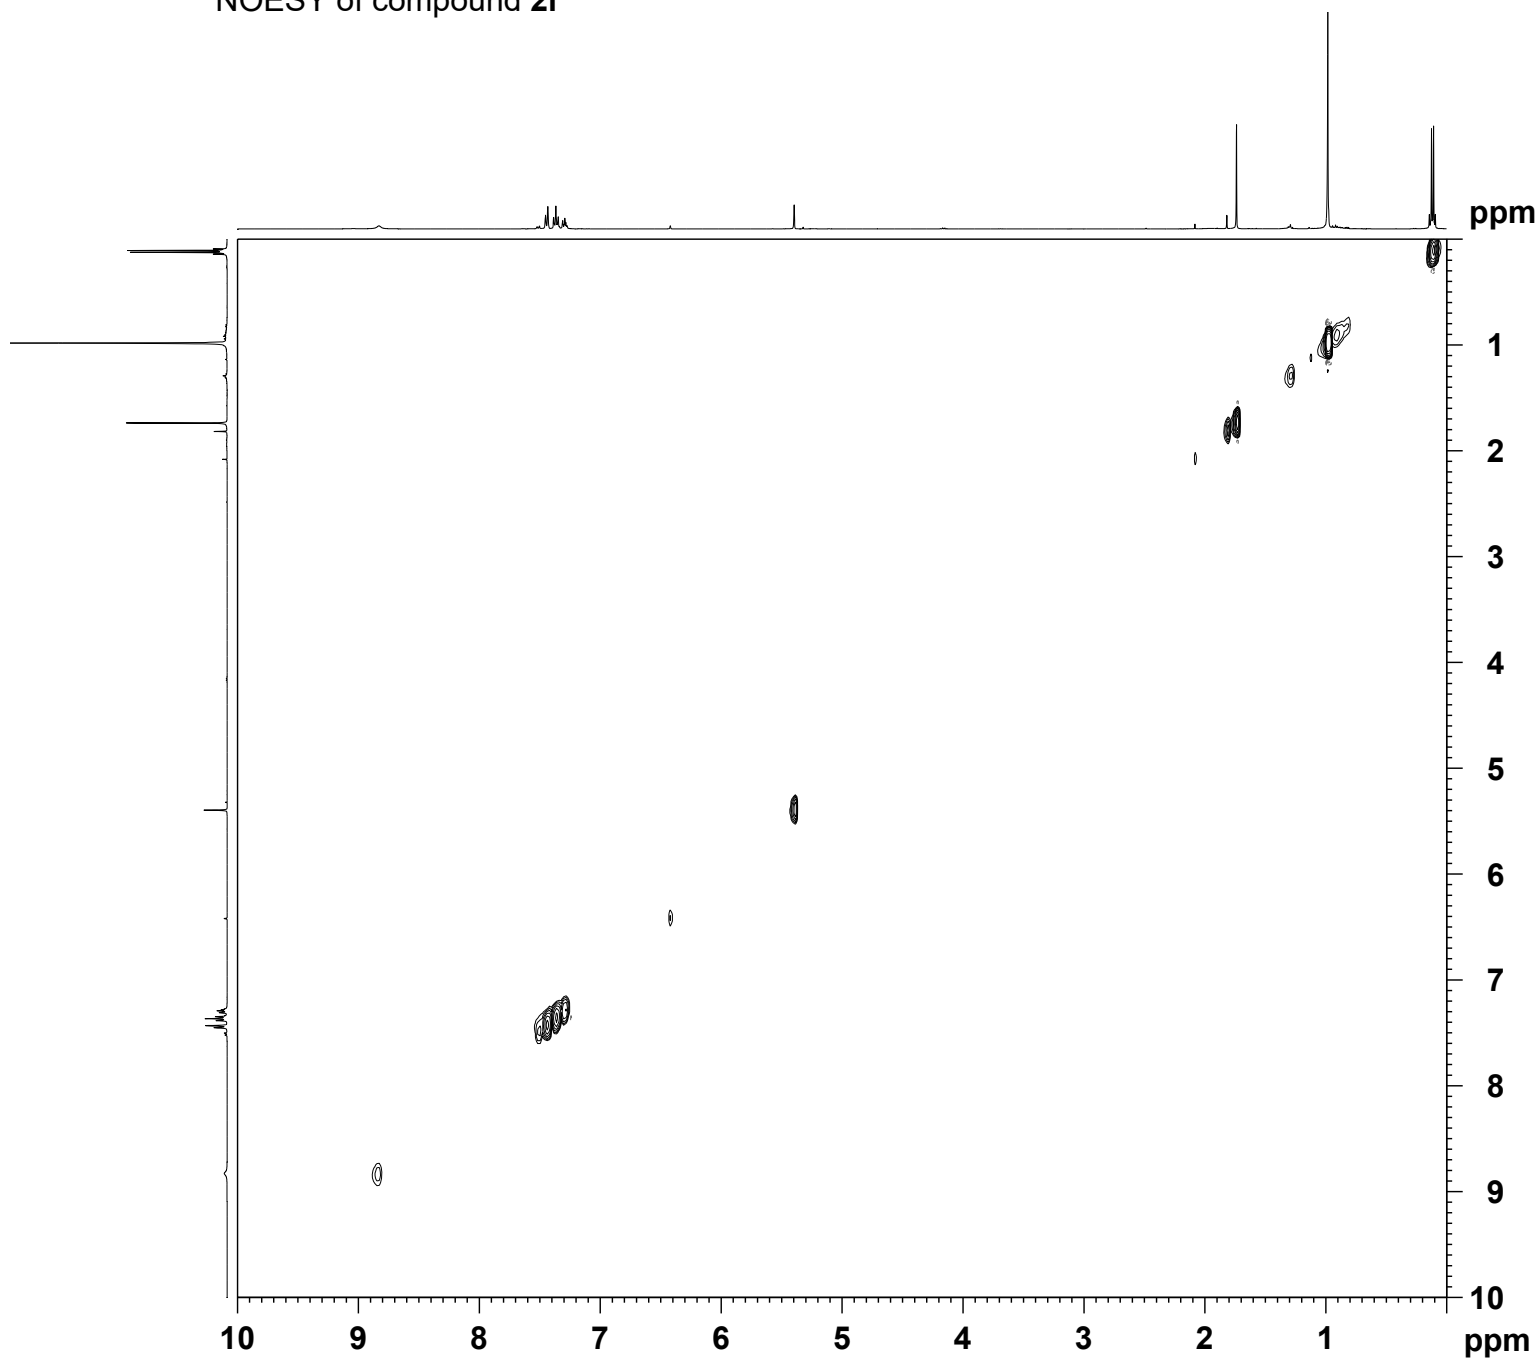

Current Data Parameters  
 NAME YYH-075  
 EXPNO 8  
 PROCNO 1

## F2 - Acquisition Parameters

Date 20210427  
 Time 17.35 h  
 INSTRUM spect  
 PROBHD Z108618\_0922 (  
 PULPROG noesygpphpp  
 TD 2048  
 SOLVENT CDCl3  
 NS 6  
 DS 16  
 SWH 8012.820 Hz  
 FIDRES 7.825020 Hz  
 AQ 0.1277952 sec  
 RG 63.35  
 DW 62.400 usec  
 DE 6.50 usec  
 TE 295.9 K  
 D0 0.00004394 sec  
 D1 2.00000000 sec  
 D8 0.40000001 sec  
 D11 0.03000000 sec  
 D12 0.00002000 sec  
 D16 0.00020000 sec  
 IN0 0.00012480 sec  
 T Dav 1  
 SFO1 400.1324008 MHz  
 NUC1 1H  
 P1 14.50 usec  
 P2 29.00 usec  
 P17 2500.00 usec  
 PLW1 12.69999981 W  
 PLW10 2.96690011 W  
 GPNAM[1] SMSQ10.100  
 GPZ1 40.00 %  
 P16 1000.00 usec

## F1 - Acquisition parameters

TD 256  
 SFO1 400.1324 MHz  
 FIDRES 62.600159 Hz  
 SW 20.025 ppm  
 FnMODE States-TPPI

## F2 - Processing parameters

SI 1024  
 SF 400.1300000 MHz  
 WDW QSINE  
 SSB 2  
 LB 0 Hz  
 GB 0  
 PC 1.40

## F1 - Processing parameters

SI 1024  
 MC2 States-TPPI  
 SF 400.1300000 MHz  
 WDW QSINE  
 SSB 2  
 LB 0 Hz  
 GB 0

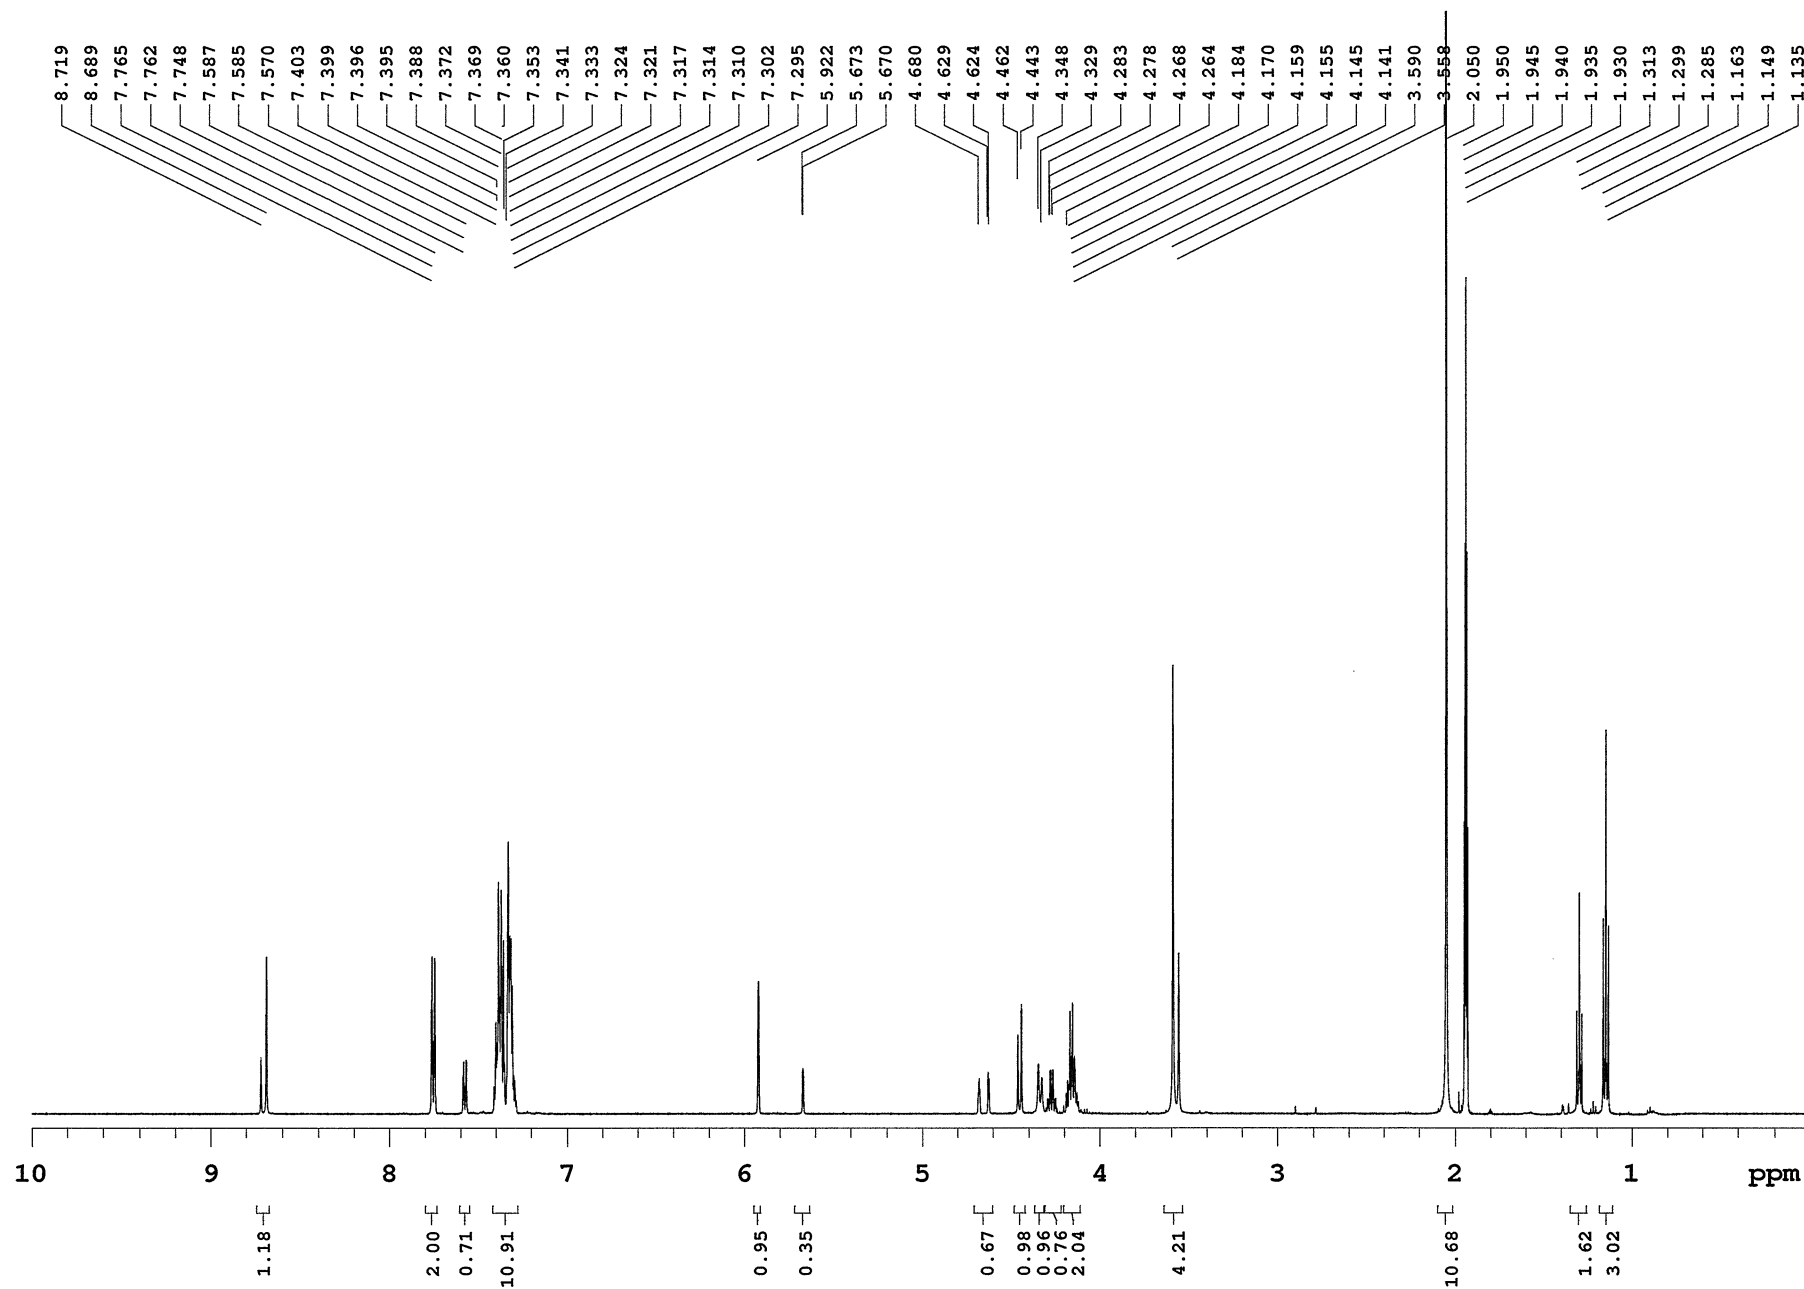

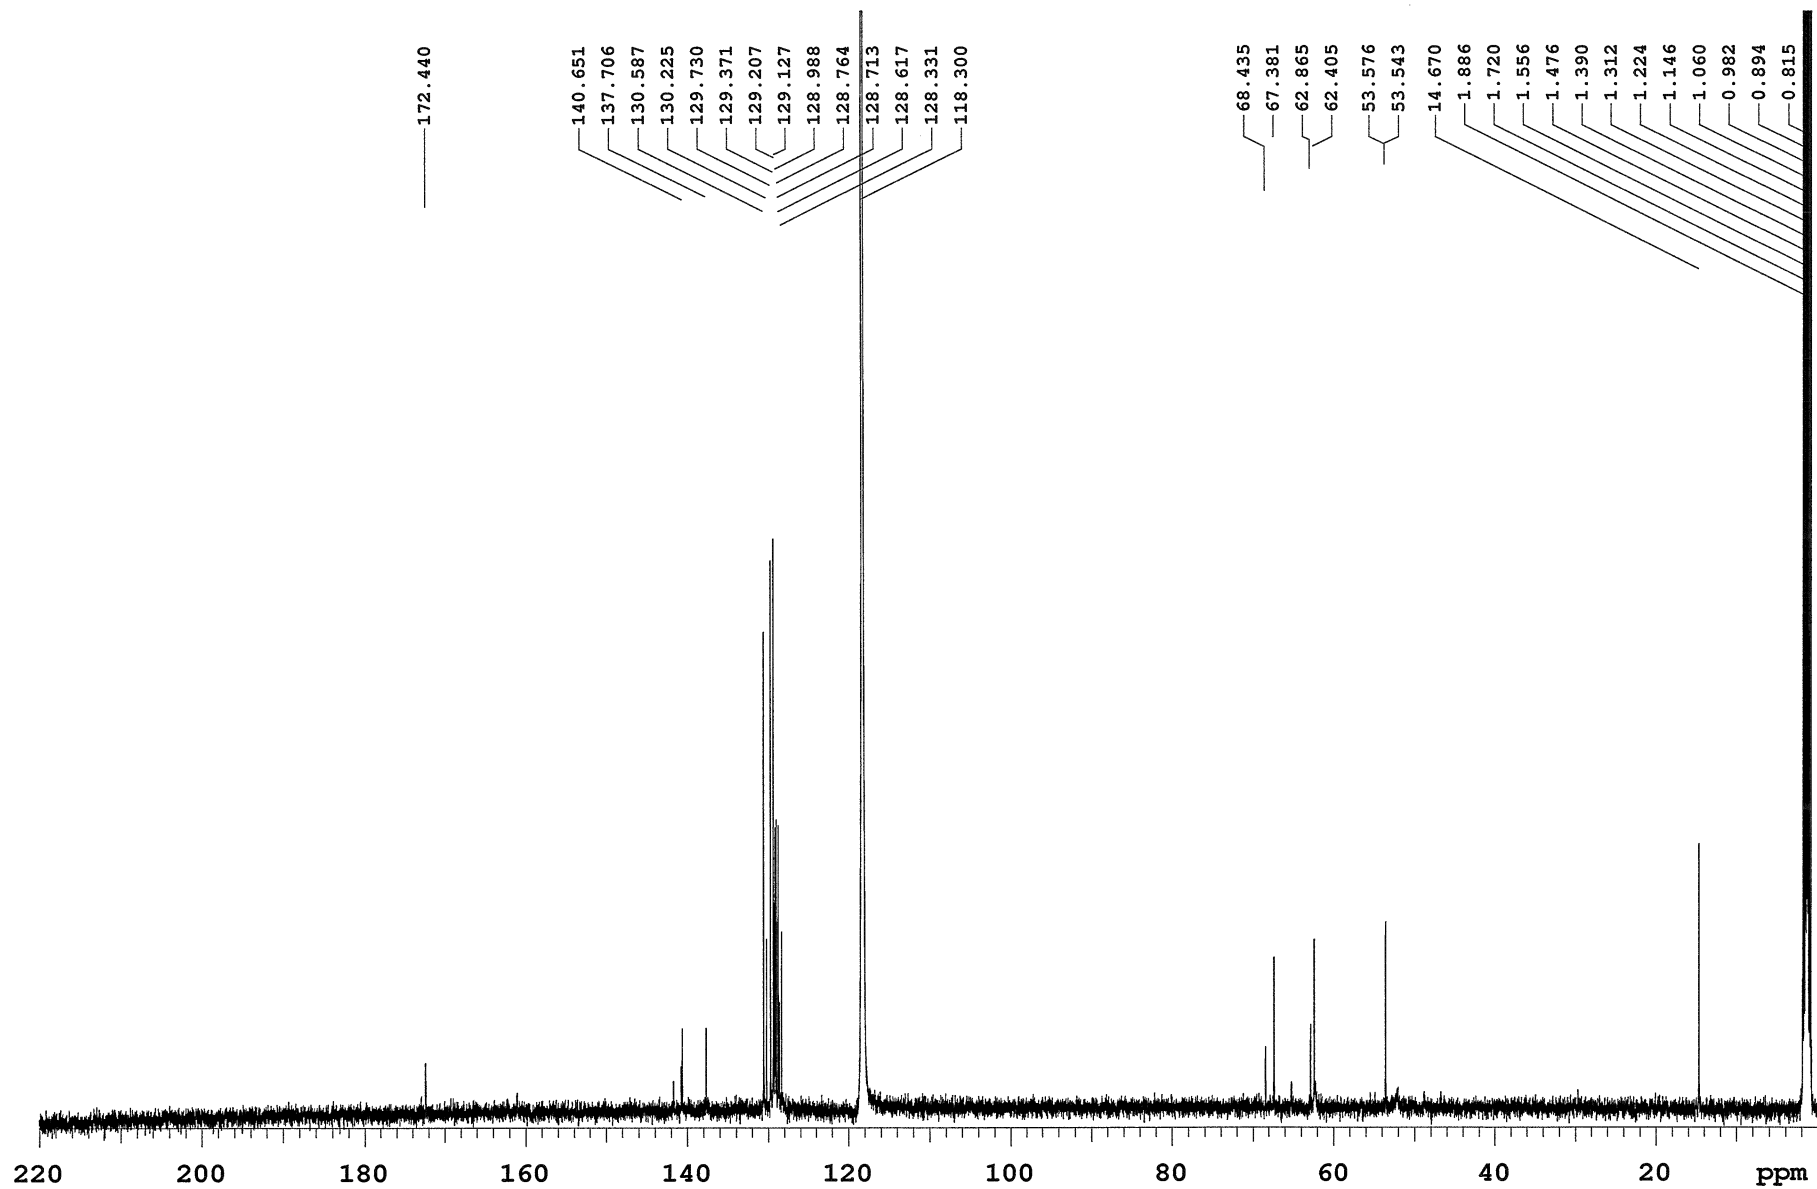

13C NMR (CD3CN, 125 MHz, 50 centi degrees) of compound 2j

1H NMR (CDCl3, 400 MHz) of compound 3a

S60

7.240  
7.231  
7.210  
7.091  
7.071  
6.420  
6.405  
6.391  
6.376  
3.908  
3.896  
3.892  
3.883  
3.873  
3.869  
3.857  
3.255  
3.231  
3.221  
3.197  
2.743  
2.732  
2.709  
2.697  
1.855  
1.840  
1.656  
1.470  
1.454

Current Data Parameters  
NAME nitrone-3  
EXPNO 1  
PROCNO 1

F2 - Acquisition Parameters  
Date\_ 20211122  
Time\_ 21.56 h  
INSTRUM spect  
PROBHD z108618\_0922 (  
PULPROG zg30  
TD 32768  
SOLVENT CDC13  
NS 16  
DS 0  
SWH 8012.820 Hz  
FIDRES 0.489064 Hz  
AQ 2.0447233 sec  
RG 210.28  
DW 62.400 usec  
DE 16.43 usec  
TE 296.4 K  
D1 2.00000000 sec  
TD0 1  
SFO1 400.1324008 MHz  
NUC1 1H  
P1 14.50 usec  
PLW1 12.80000019 W

F2 - Processing parameters  
SI 16384  
SF 400.1300193 MHz  
WDW EM  
SSB 0  
LB 0 Hz  
GB 0  
PC 1.00

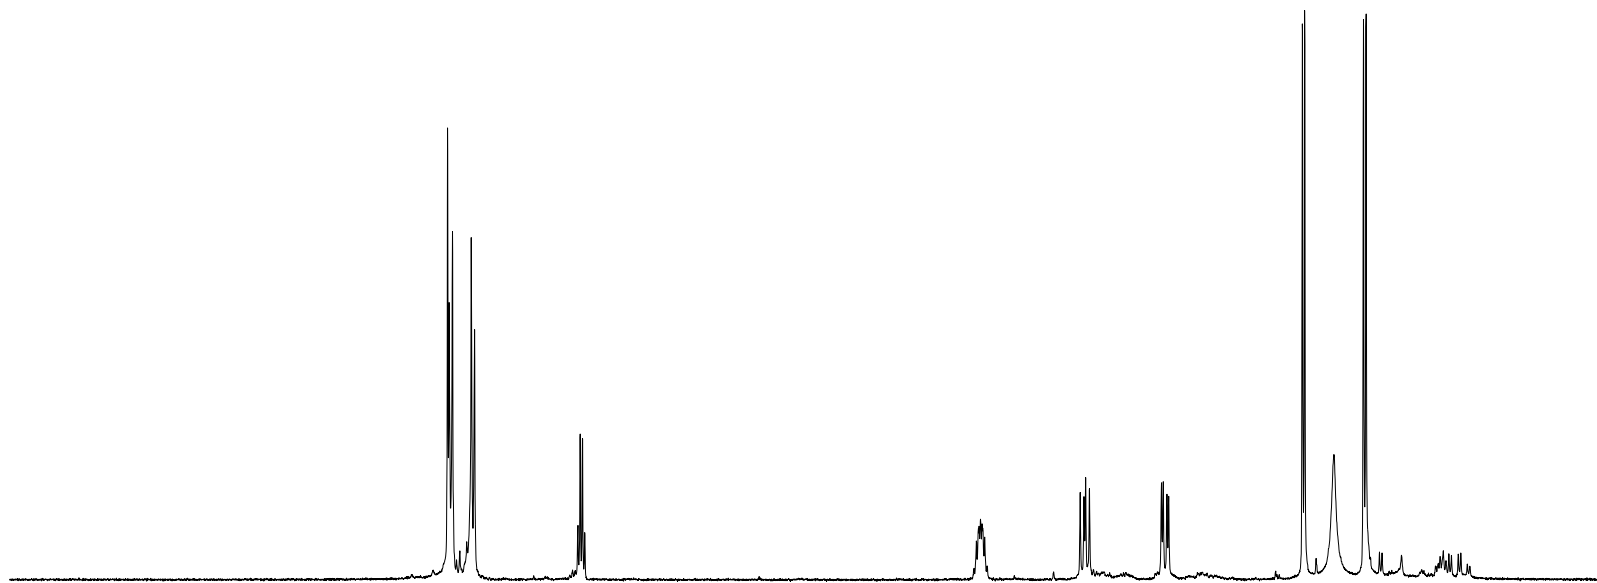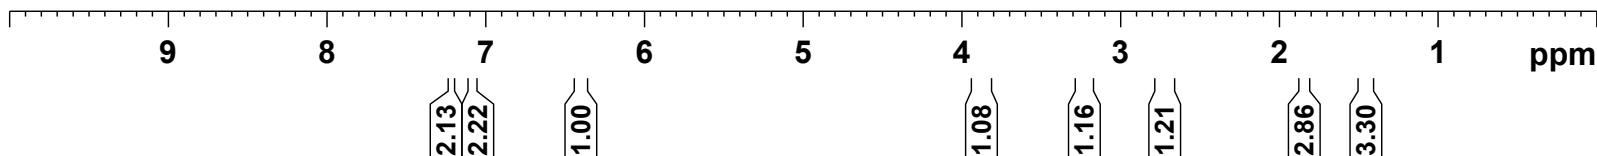



13C NMR (CDCl3, 100 MHz) of compound 3a

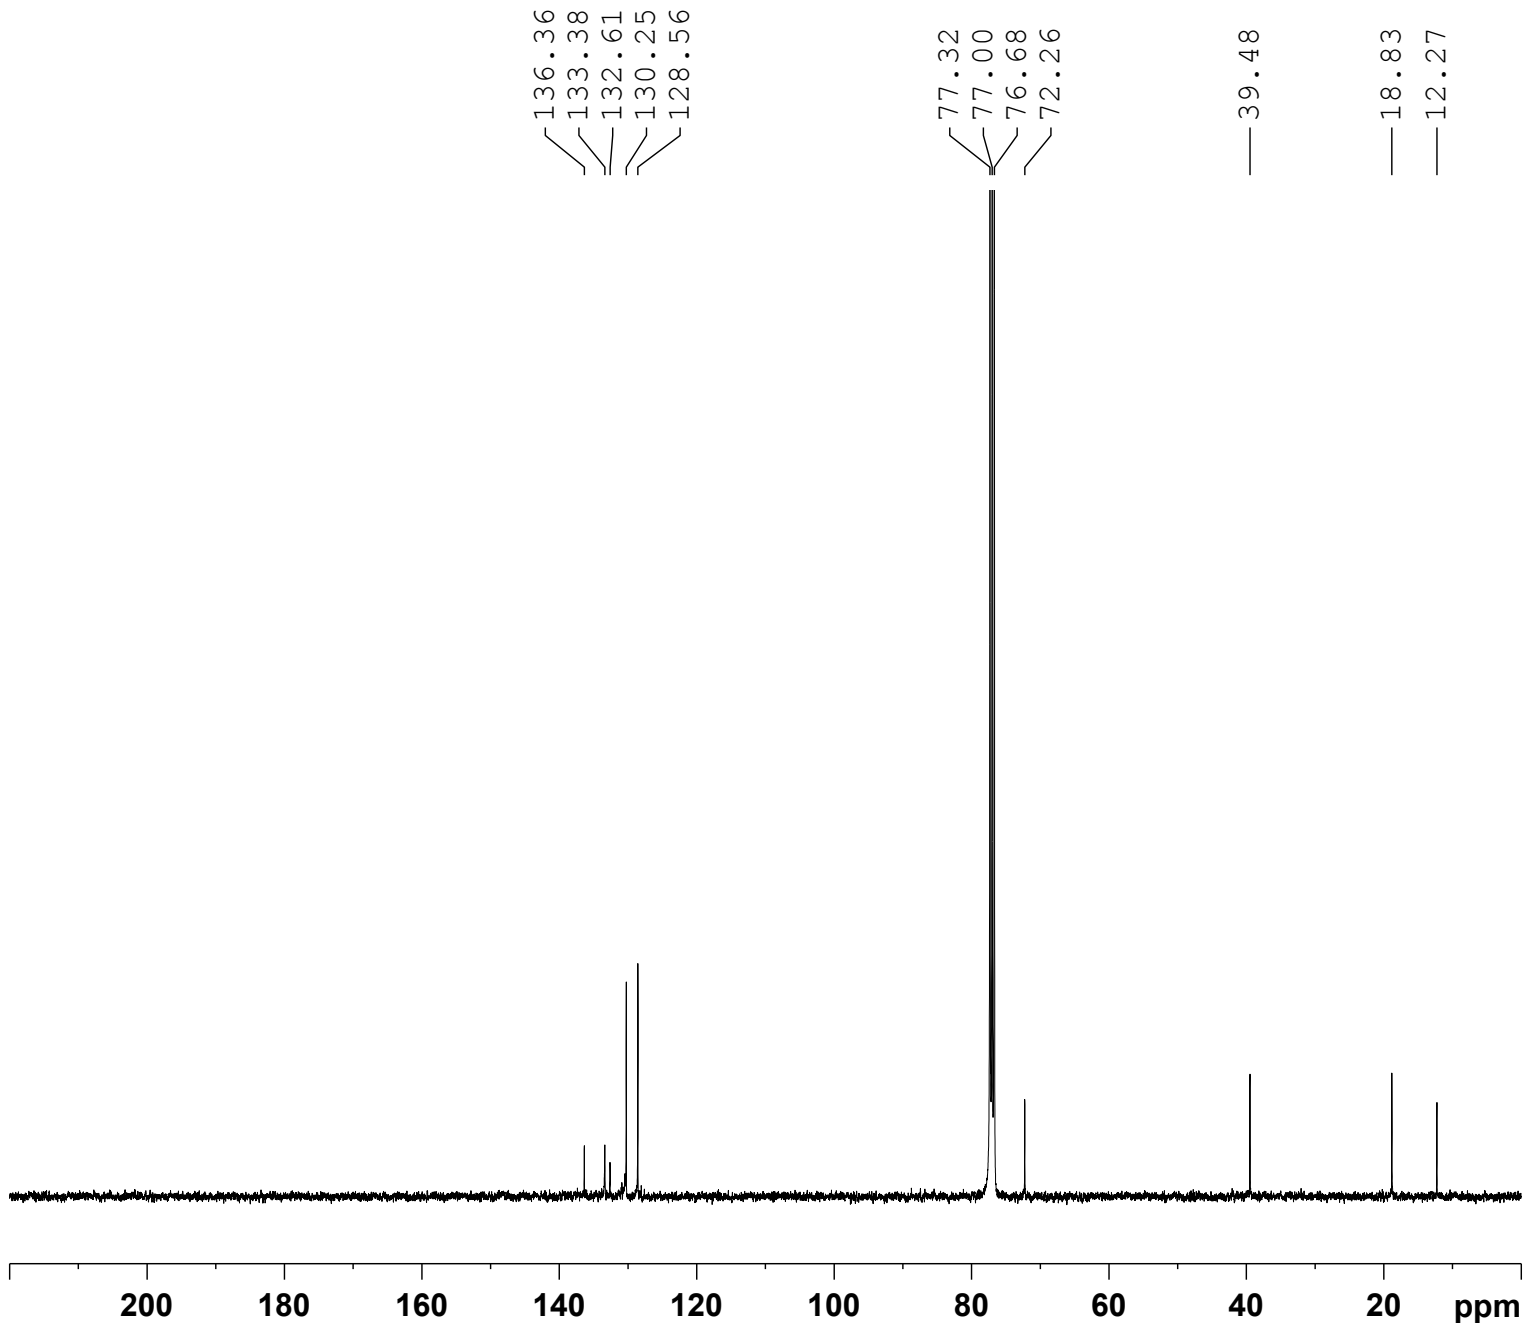

```

Current Data Parameters
NAME          nitrone-3
EXPNO         2
PROCNO        1

F2 - Acquisition Parameters
Date_         20211123
Time_         1.45 h
INSTRUM       spect
PROBHD        Z108618_0922 (
PULPROG       zgpg30
TD            32768
SOLVENT       CDCl3
NS            5000
DS            0
SWH           24038.461 Hz
FIDRES        1.467191 Hz
AQ            0.6815744 sec
RG            210.28
DW            20.800 usec
DE            6.50 usec
TE            298.5 K
D1            2.00000000 sec
D11           0.03000000 sec
TD0           1
SFO1          100.6233329 MHz
NUC1          13C
P1            10.50 usec
PLW1          44.50000000 W
SFO2          400.1316005 MHz
NUC2          1H
CPDPRG[2]    bi_waltz65 256
PCPD2         90.00 usec
PLW2          14.00000000 W
PLW12         0.36340001 W
PLW13         0.18250000 W

F2 - Processing parameters
SI            32768
SF            100.6127707 MHz
WDW           EM
SSB           0
LB            2.00 Hz
GB            0
PC            1.00
    
```

## DEPT of compound 3a

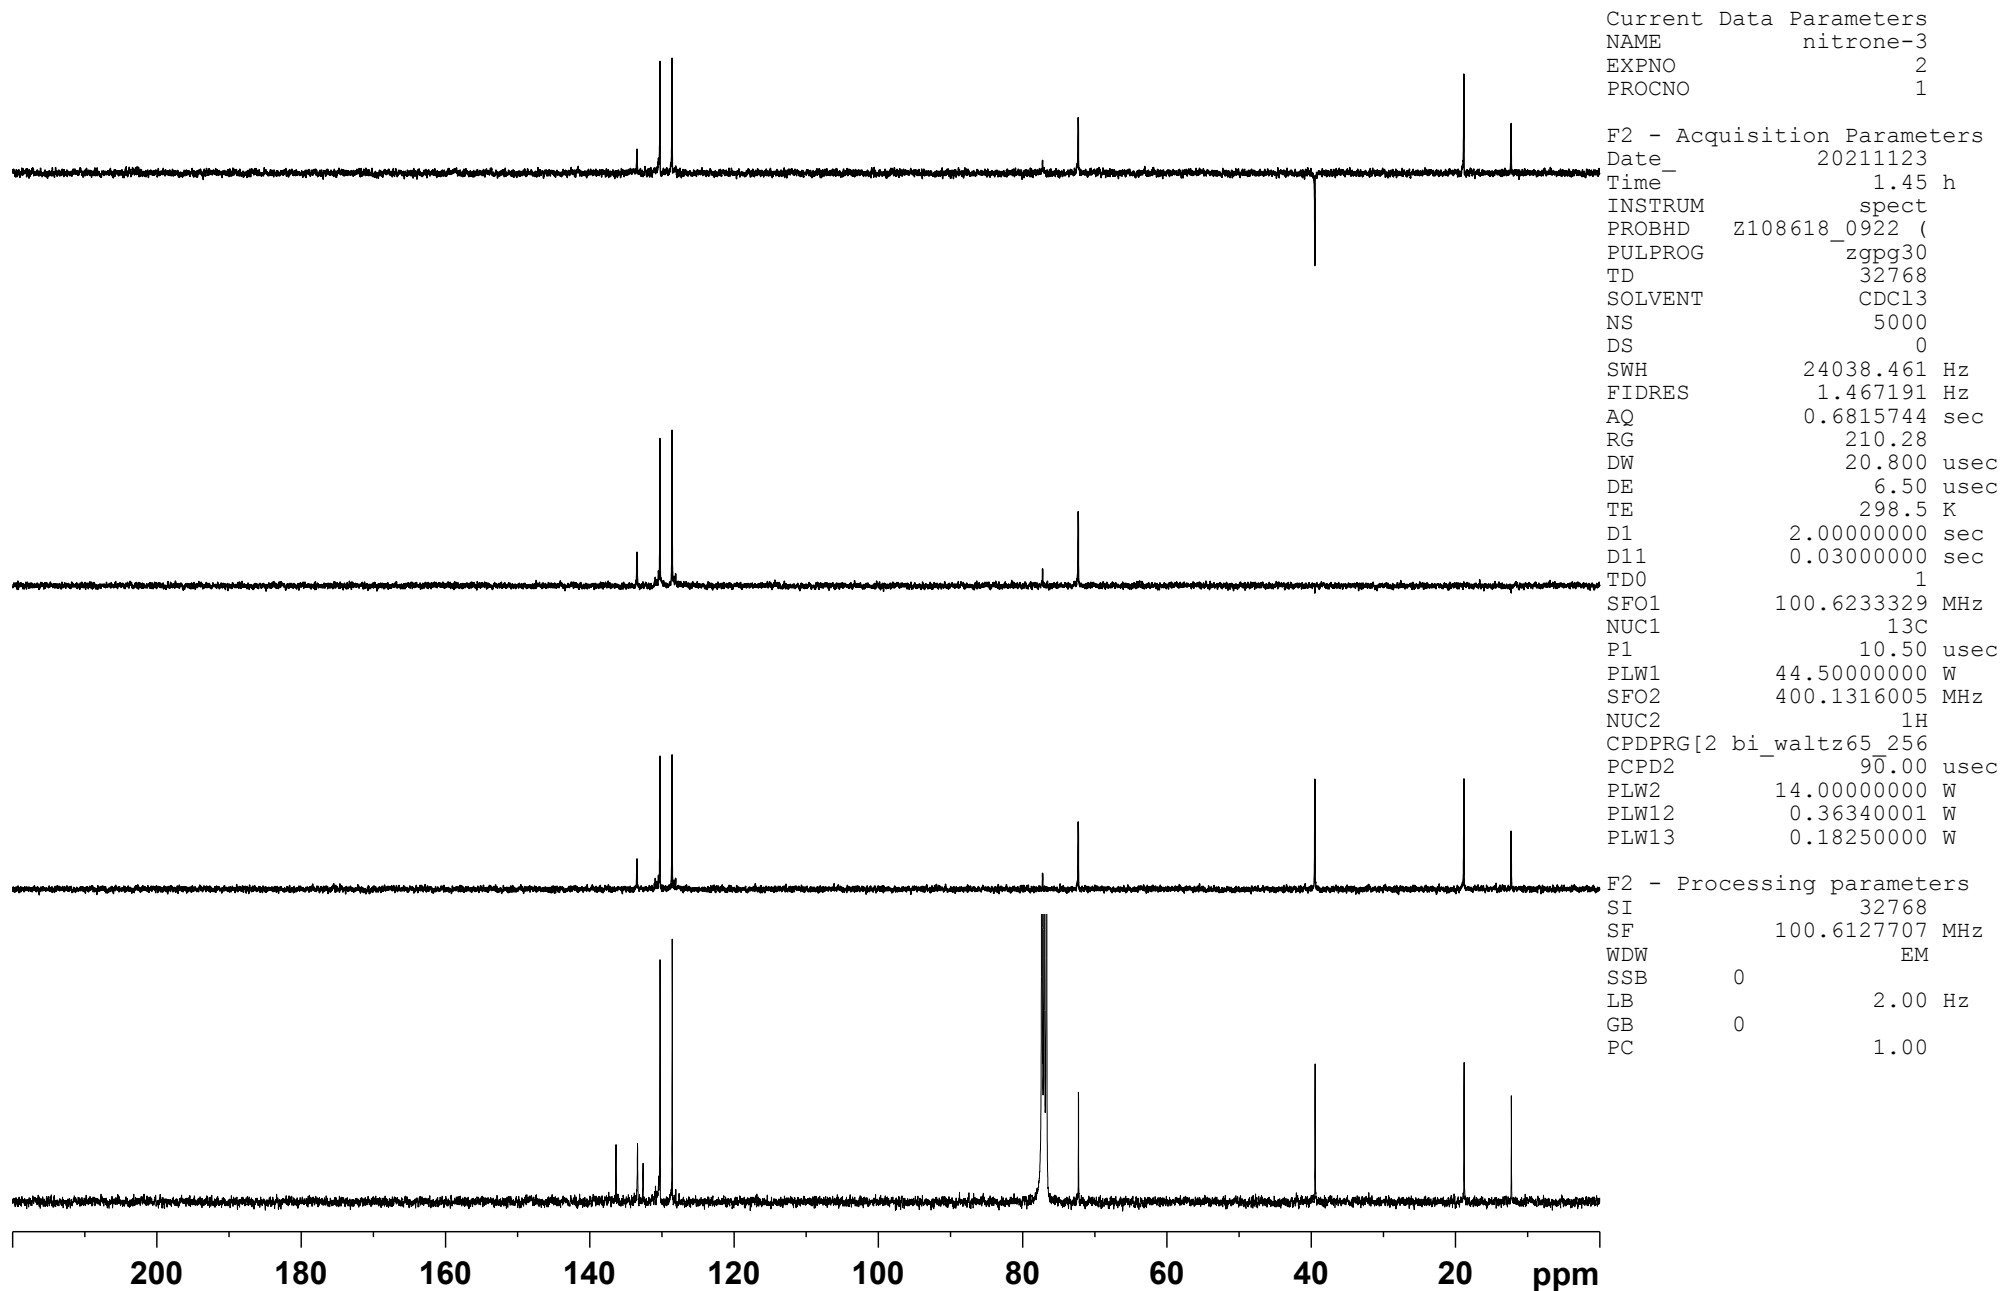

# HSQC of compound 3a

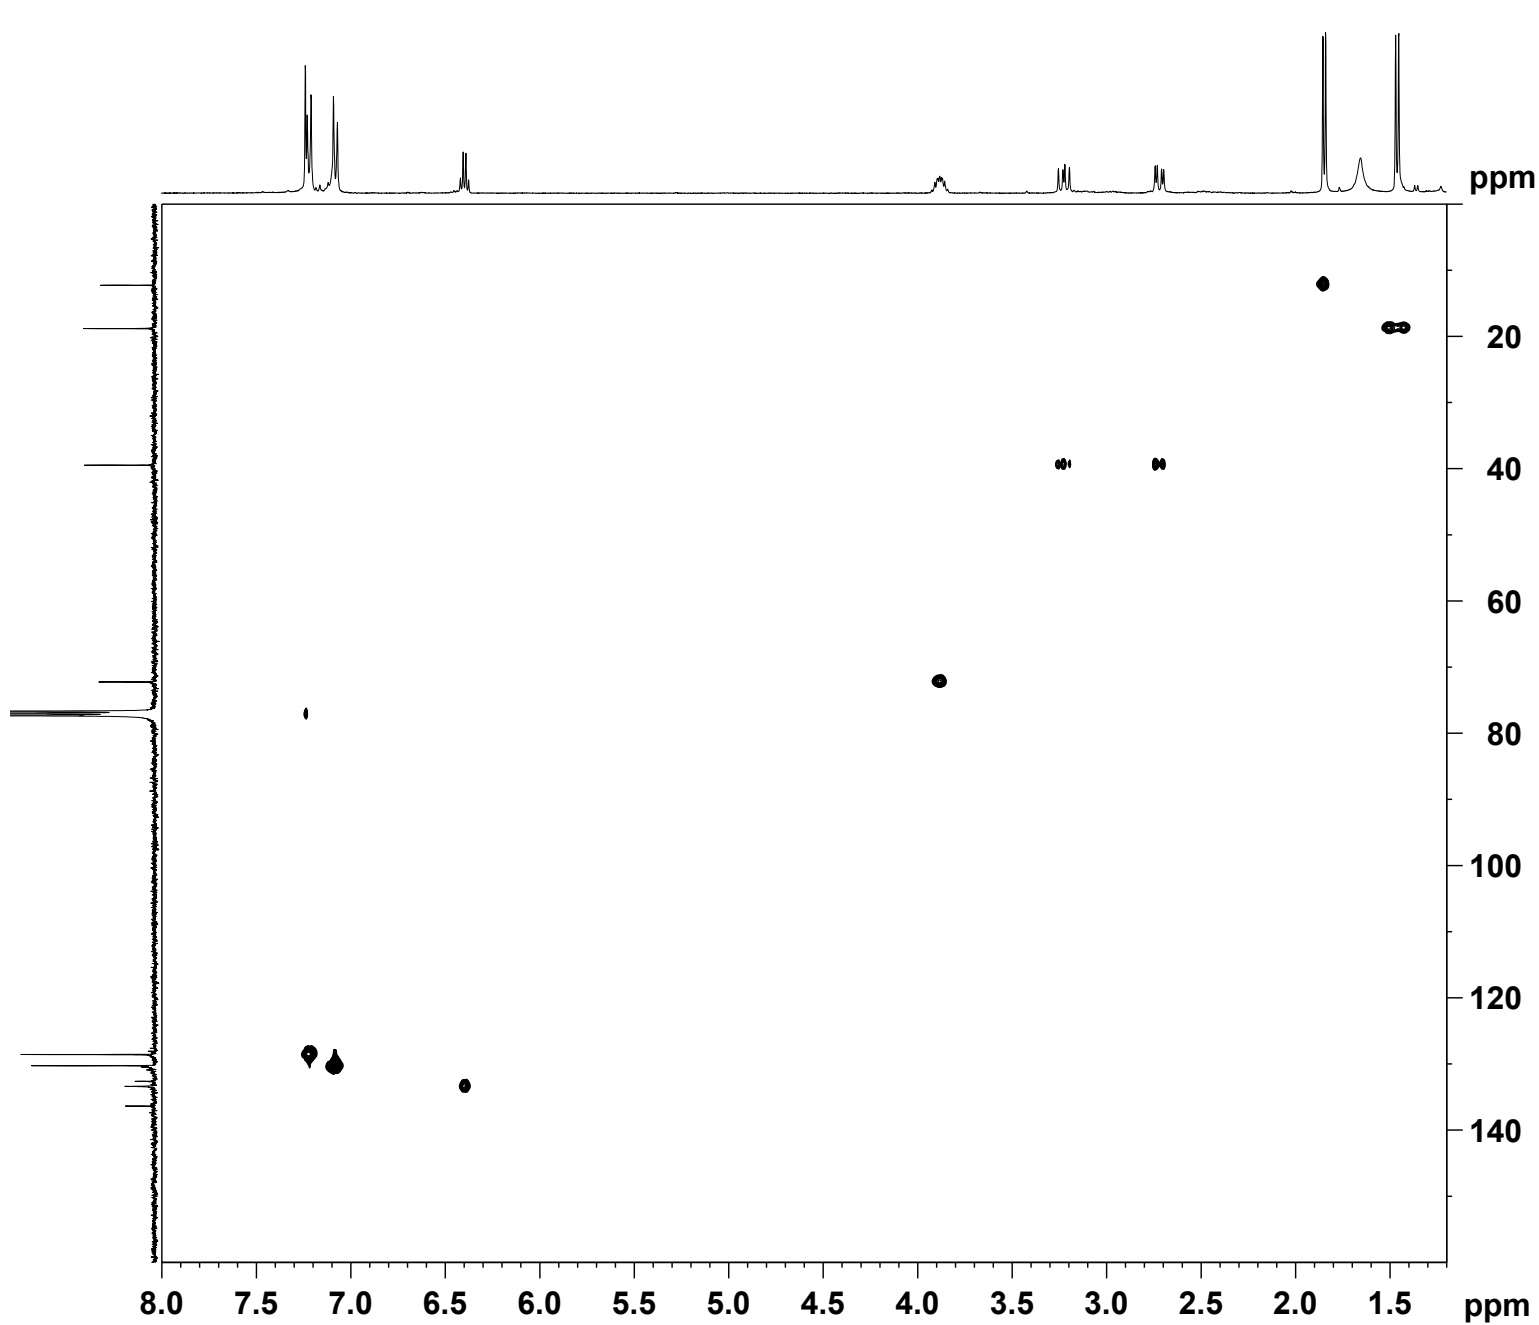

```

Current Data Parameters
NAME      nitrone-3
EXPNO    6
PROCNO   1

F2 - Acquisition Parameters
Date_    20211123
Time     6.43 h
INSTRUM  spect
PROBHD   Z108618_0922 (
PULPROG  hsqcetgpsisp2.2
TD       2048
SOLVENT  CDCl3
NS       6
DS       16
SWH      4000.000 Hz
FIDRES   3.906250 Hz
AQ       0.2560000 sec
RG       210.28
DW       125.000 usec
DE       6.50 usec
TE       297.6 K
CNST2    145.0000000
CNST17   -0.5000000
D0       0.00000300 sec
D1       1.50000000 sec
D4       0.00172414 sec
D11      0.03000000 sec
D16      0.00020000 sec
D24      0.00086207 sec
IN0      0.00002480 sec
TDav     1
SFO1     400.1324008 MHz
NUC1     1H
P1       14.50 usec
P2       29.00 usec
P28      1000.00 usec
PLW1     12.80000019 W
SFO2     100.6233329 MHz
NUC2     13C
CPDPRG[2] garp
P3       10.50 usec
P14      500.00 usec
P24      2000.00 usec
PCPD2    80.00 usec
PLW0     0 W
PLW2     44.00000000 W
PLW12    0.75796998 W
SPNAM[3] Crp60,0.5,20.1
SFOAL3   0.500
SPOFFS3  0 Hz
SPW3     7.41179991 W
SPNAM[7] Crp60comp.4
SFOAL7   0.500
SPOFFS7  0 Hz
SPW7     7.41179991 W
GPNAM[1] SMSQ10.100
GPZ1     80.00 %
GPNAM[2] SMSQ10.100
GPZ2     20.10 %
GPNAM[3] SMSQ10.100
GPZ3     11.00 %
GPNAM[4] SMSQ10.100
GPZ4     -5.00 %
P16      1000.00 usec
P19      600.00 usec

F1 - Acquisition parameters
TD       256
SFO1     100.6233 MHz
FIDRES   157.510086 Hz
SW       200.364 ppm
FnMODE   Echo-Antiecho

F2 - Processing parameters
SI       1024
SF       400.1300193 MHz
WDW      QSINE
SSB      2
LB       0 Hz
GB       0
PC       1.40

F1 - Processing parameters
SI       1024
MC2      echo-antiecho
SF       100.6127685 MHz
WDW      QSINE
SSB      2
LB       0 Hz
GB       0
    
```

## COSY of compound 3a

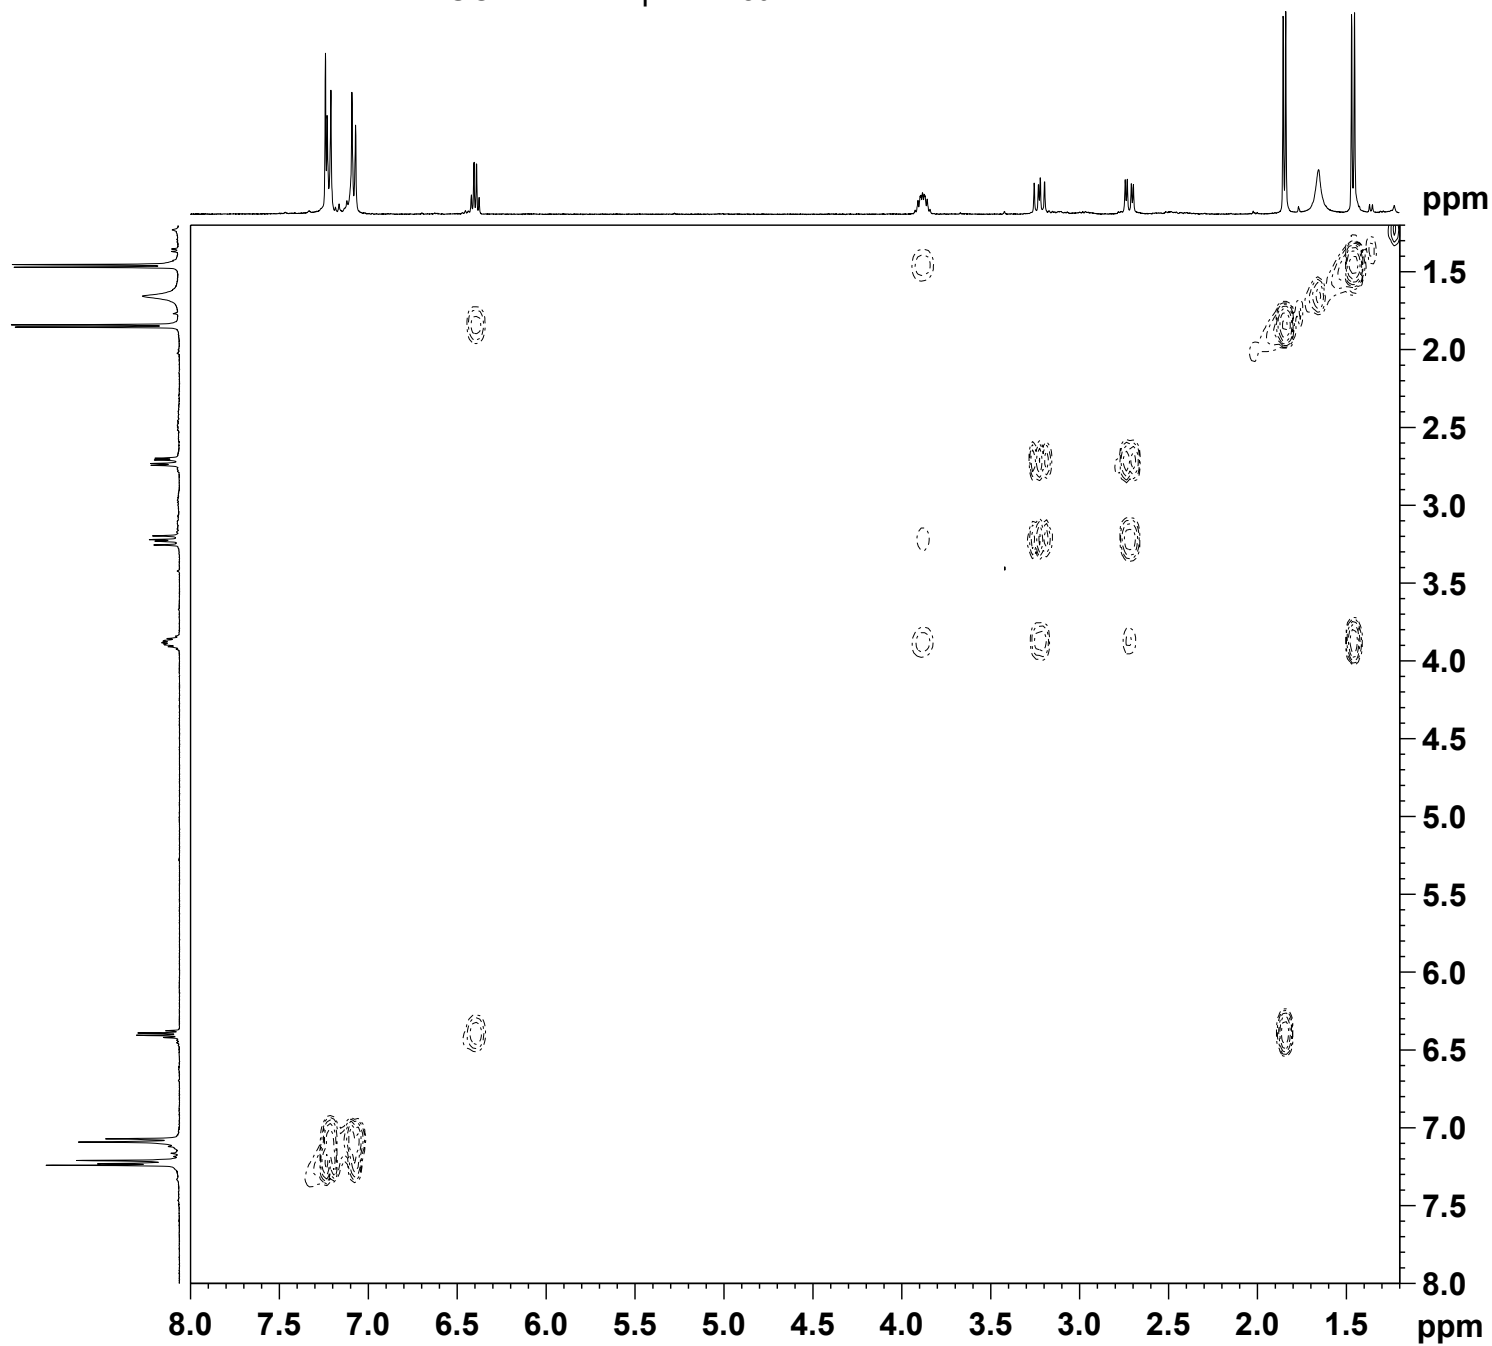

Current Data Parameters  
 NAME nitrone-3  
 EXPNO 7  
 PROCNO 1

## F2 - Acquisition Parameters

Date\_ 20211123  
 Time\_ 7.29 h  
 INSTRUM spect  
 PROBHD Z108618\_0922 (  
 PULPROG cosygpppqf  
 TD 2048  
 SOLVENT CDCl3  
 NS 6  
 DS 16  
 SWH 8012.820 Hz  
 FIDRES 7.825020 Hz  
 AQ 0.1277952 sec  
 RG 210.28  
 DW 62.400 usec  
 DE 6.50 usec  
 TE 297.8 K  
 D0 0.00000300 sec  
 D1 2.00000000 sec  
 D11 0.03000000 sec  
 D12 0.00002000 sec  
 D13 0.00000400 sec  
 D16 0.00020000 sec  
 IN0 0.00012480 sec  
 T Dav 1  
 SFO1 400.1324008 MHz  
 NUC1 1H  
 P0 14.50 usec  
 P1 14.50 usec  
 P17 2500.00 usec  
 PLW1 12.80000019 W  
 PLW10 2.99020004 W  
 GPNAM[1] SMSQ10.100  
 GPZ1 10.00 %  
 P16 1000.00 usec

## F1 - Acquisition parameters

TD 256  
 SFO1 400.1324 MHz  
 FIDRES 62.600159 Hz  
 SW 20.025 ppm  
 FnmODE QF

## F2 - Processing parameters

SI 1024  
 SF 400.1300193 MHz  
 WDW QSINE  
 SSB 0  
 LB 0 Hz  
 GB 0  
 PC 1.40

## F1 - Processing parameters

SI 1024  
 MC2 QF  
 SF 400.1300193 MHz  
 WDW QSINE  
 SSB 0  
 LB 0 Hz  
 GB 0

NOESY of compound 3a

S65

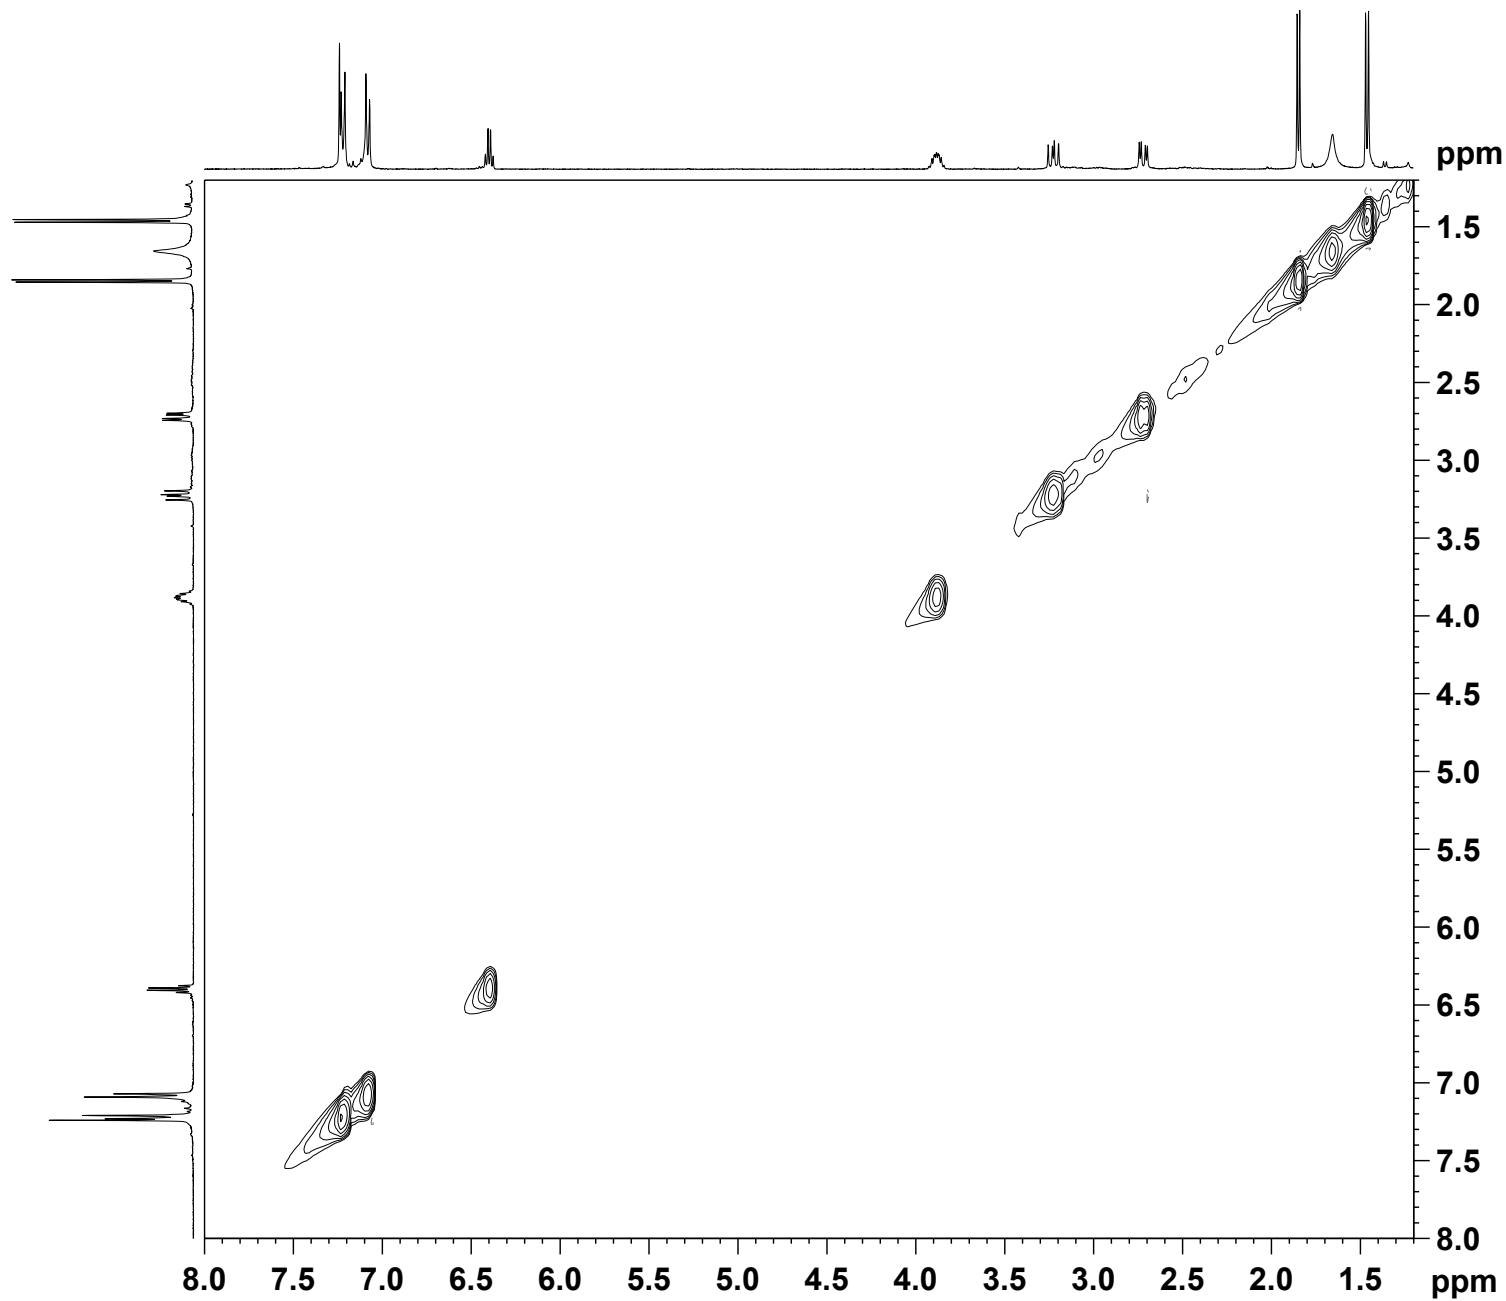

```

Current Data Parameters
NAME          nitrone-3
EXPNO         8
PROCNO        1

F2 - Acquisition Parameters
Date_         20211123
Time          8.26 h
INSTRUM       spect
PROBHD        Z108618_0922 (
PULPROG       noesygpphpp
TD            2048
SOLVENT       CDCl3
NS            6
DS            16
SWH           8012.820 Hz
FIDRES        7.825020 Hz
AQ            0.1277952 sec
RG            210.28
DW            62.400 usec
DE            6.50 usec
TE            297.0 K
D0            0.00004394 sec
D1            2.00000000 sec
D8            0.40000001 sec
D11           0.03000000 sec
D12           0.00002000 sec
D16           0.00020000 sec
IN0           0.00012480 sec
TDav          1
SFO1          400.1324008 MHz
NUC1          1H
P1            14.50 usec
P2            29.00 usec
P17           2500.00 usec
PLW1          12.80000019 W
PLW10         2.99020004 W
GPNAM[1]      SMSQ10.100
GPZ1          40.00 %
P16           1000.00 usec

F1 - Acquisition parameters
TD            256
SFO1          400.1324 MHz
FIDRES        62.600159 Hz
SW            20.025 ppm
FnMODE        States-TPPI

F2 - Processing parameters
SI            1024
SF            400.1300193 MHz
WDW           QSINE
SSB           2
LB            0 Hz
GB            0
PC            1.40

F1 - Processing parameters
SI            1024
MC2           States-TPPI
SF            400.1300193 MHz
WDW           QSINE
SSB           2
LB            0 Hz
GB            0
    
```

1H NMR (CDCl3, 400 MHz) of compound 4a

S66

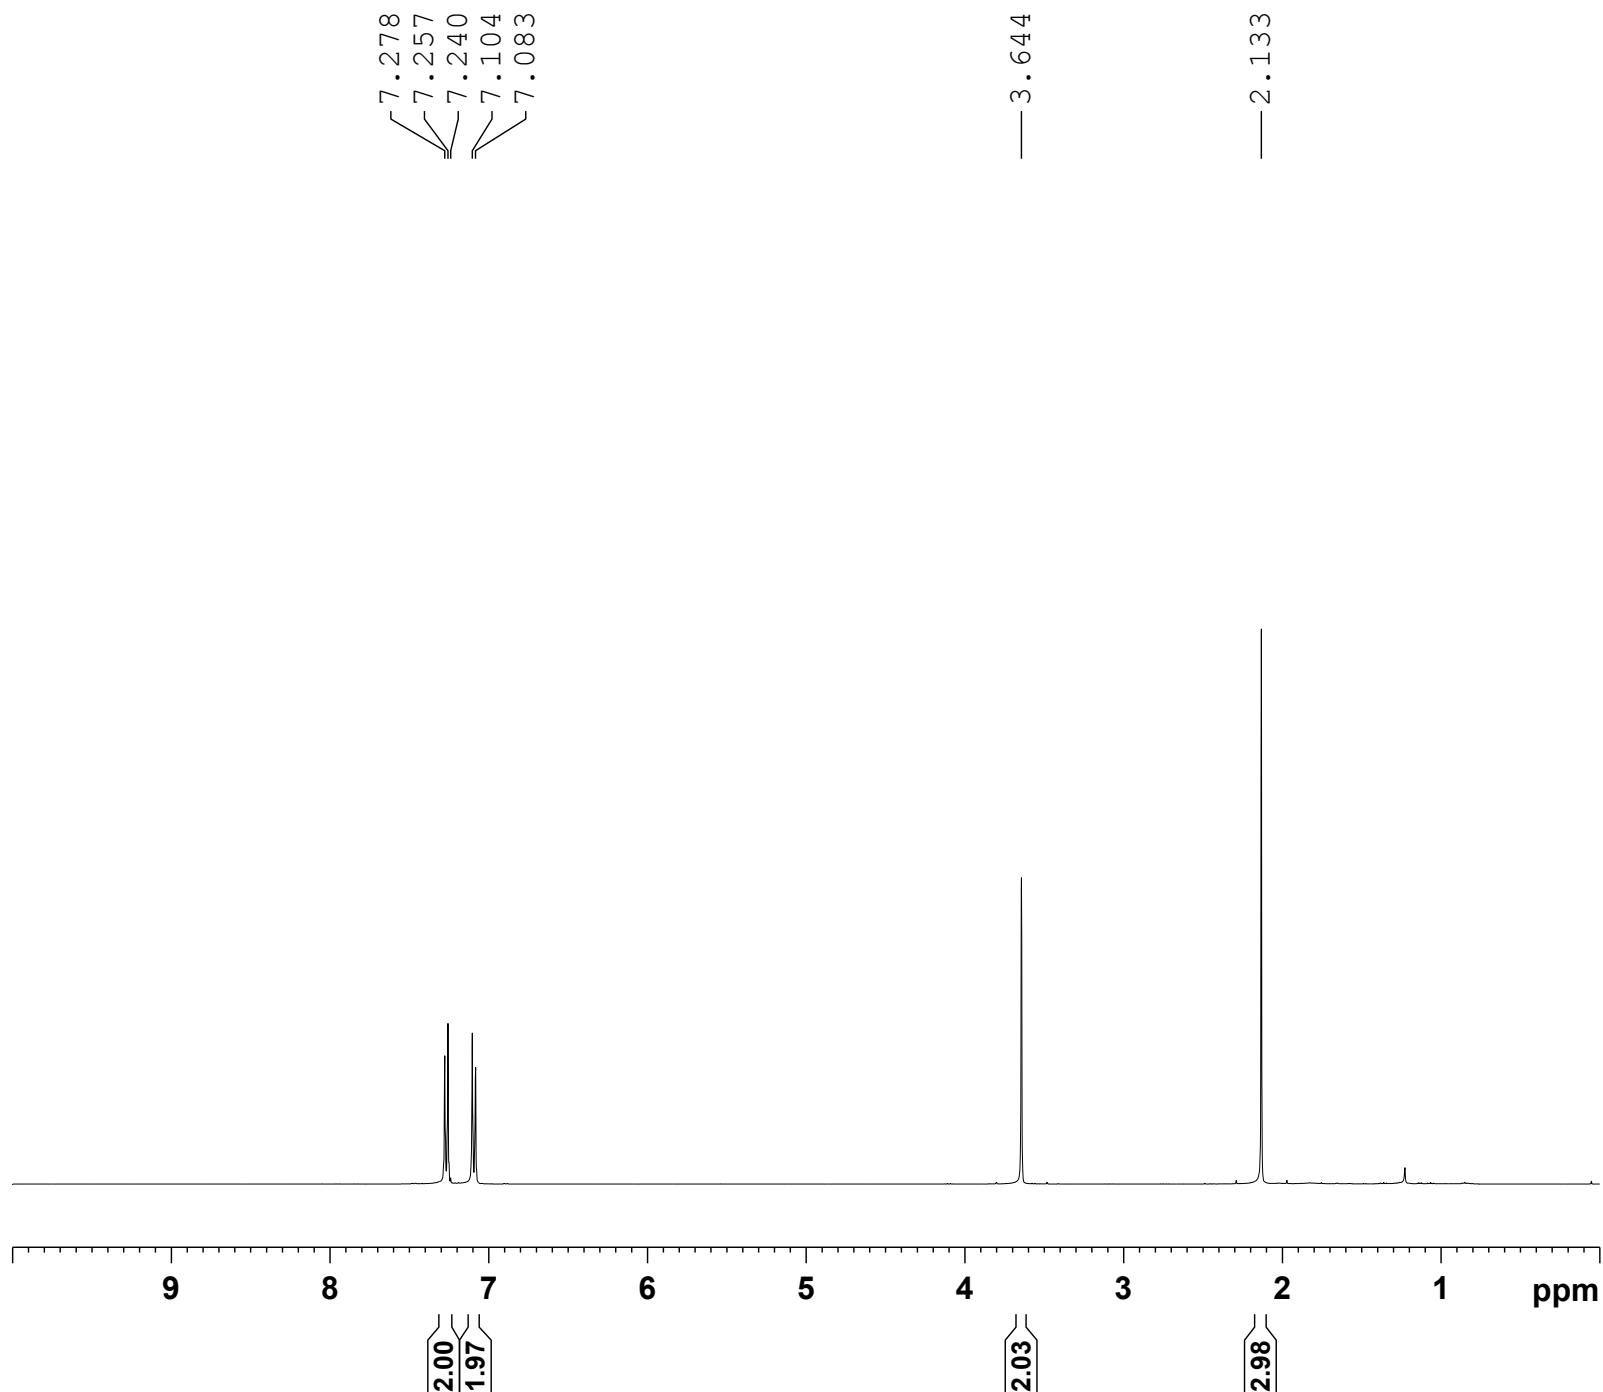

Current Data Parameters  
 NAME YYH-042  
 EXPNO 1  
 PROCNO 1

F2 - Acquisition Parameters  
 Date\_ 20210218  
 Time\_ 21.55 h  
 INSTRUM spect  
 PROBHD z108618\_0922 (  
 PULPROG zg30  
 TD 32768  
 SOLVENT CDCl3  
 NS 16  
 DS 0  
 SWH 8012.820 Hz  
 FIDRES 0.489064 Hz  
 AQ 2.0447233 sec  
 RG 63.35  
 DW 62.400 usec  
 DE 16.43 usec  
 TE 294.9 K  
 D1 2.00000000 sec  
 TD0 1  
 SFO1 400.1324008 MHz  
 NUC1 1H  
 P1 14.50 usec  
 PLW1 12.69999981 W

F2 - Processing parameters  
 SI 16384  
 SF 400.1300178 MHz  
 WDW EM  
 SSB 0  
 LB 0 Hz  
 GB 0  
 PC 1.00

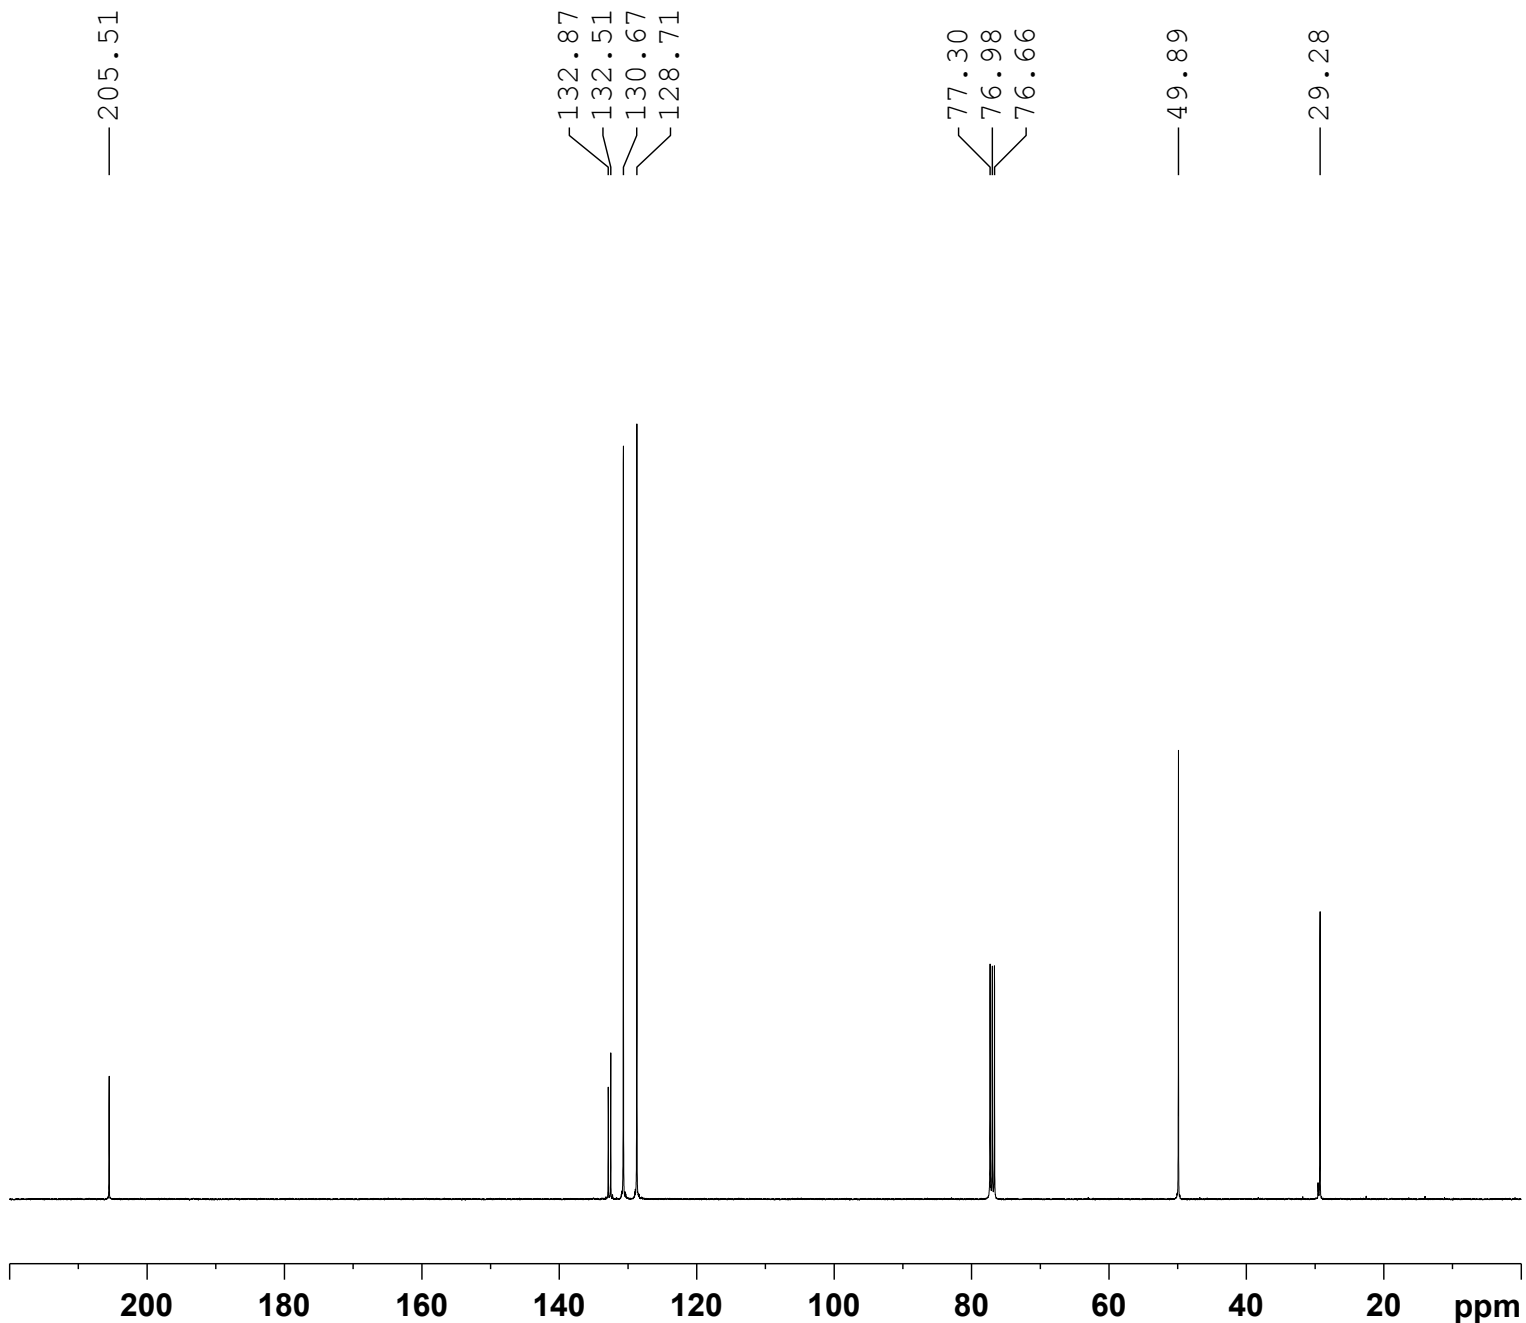13C NMR (CDCl<sub>3</sub>, 100 MHz) of compound **4a**

Current Data Parameters  
NAME YYH-042  
EXPNO 2  
PROCNO 1

F2 - Acquisition Parameters  
Date\_ 20210219  
Time\_ 0.14 h  
INSTRUM spect  
PROBHD z108618\_0922 (  
PULPROG zgpg30  
TD 32768  
SOLVENT CDCl3  
NS 3000  
DS 0  
SWH 24038.461 Hz  
FIDRES 1.467191 Hz  
AQ 0.6815744 sec  
RG 210.28  
DW 20.800 usec  
DE 6.50 usec  
TE 295.0 K  
D1 2.00000000 sec  
D11 0.03000000 sec  
TD0 1  
SFO1 100.6233329 MHz  
NUC1 13C  
P1 10.50 usec  
PLW1 44.09999847 W  
SFO2 400.1316005 MHz  
NUC2 1H  
CPDPRG[2 bi\_waltz65 256  
PCPD2 90.00 usec  
PLW2 14.30000019 W  
PLW12 0.37118000 W  
PLW13 0.18640999 W

F2 - Processing parameters  
SI 32768  
SF 100.6127825 MHz  
WDW EM  
SSB 0  
LB 2.00 Hz  
GB 0  
PC 1.00

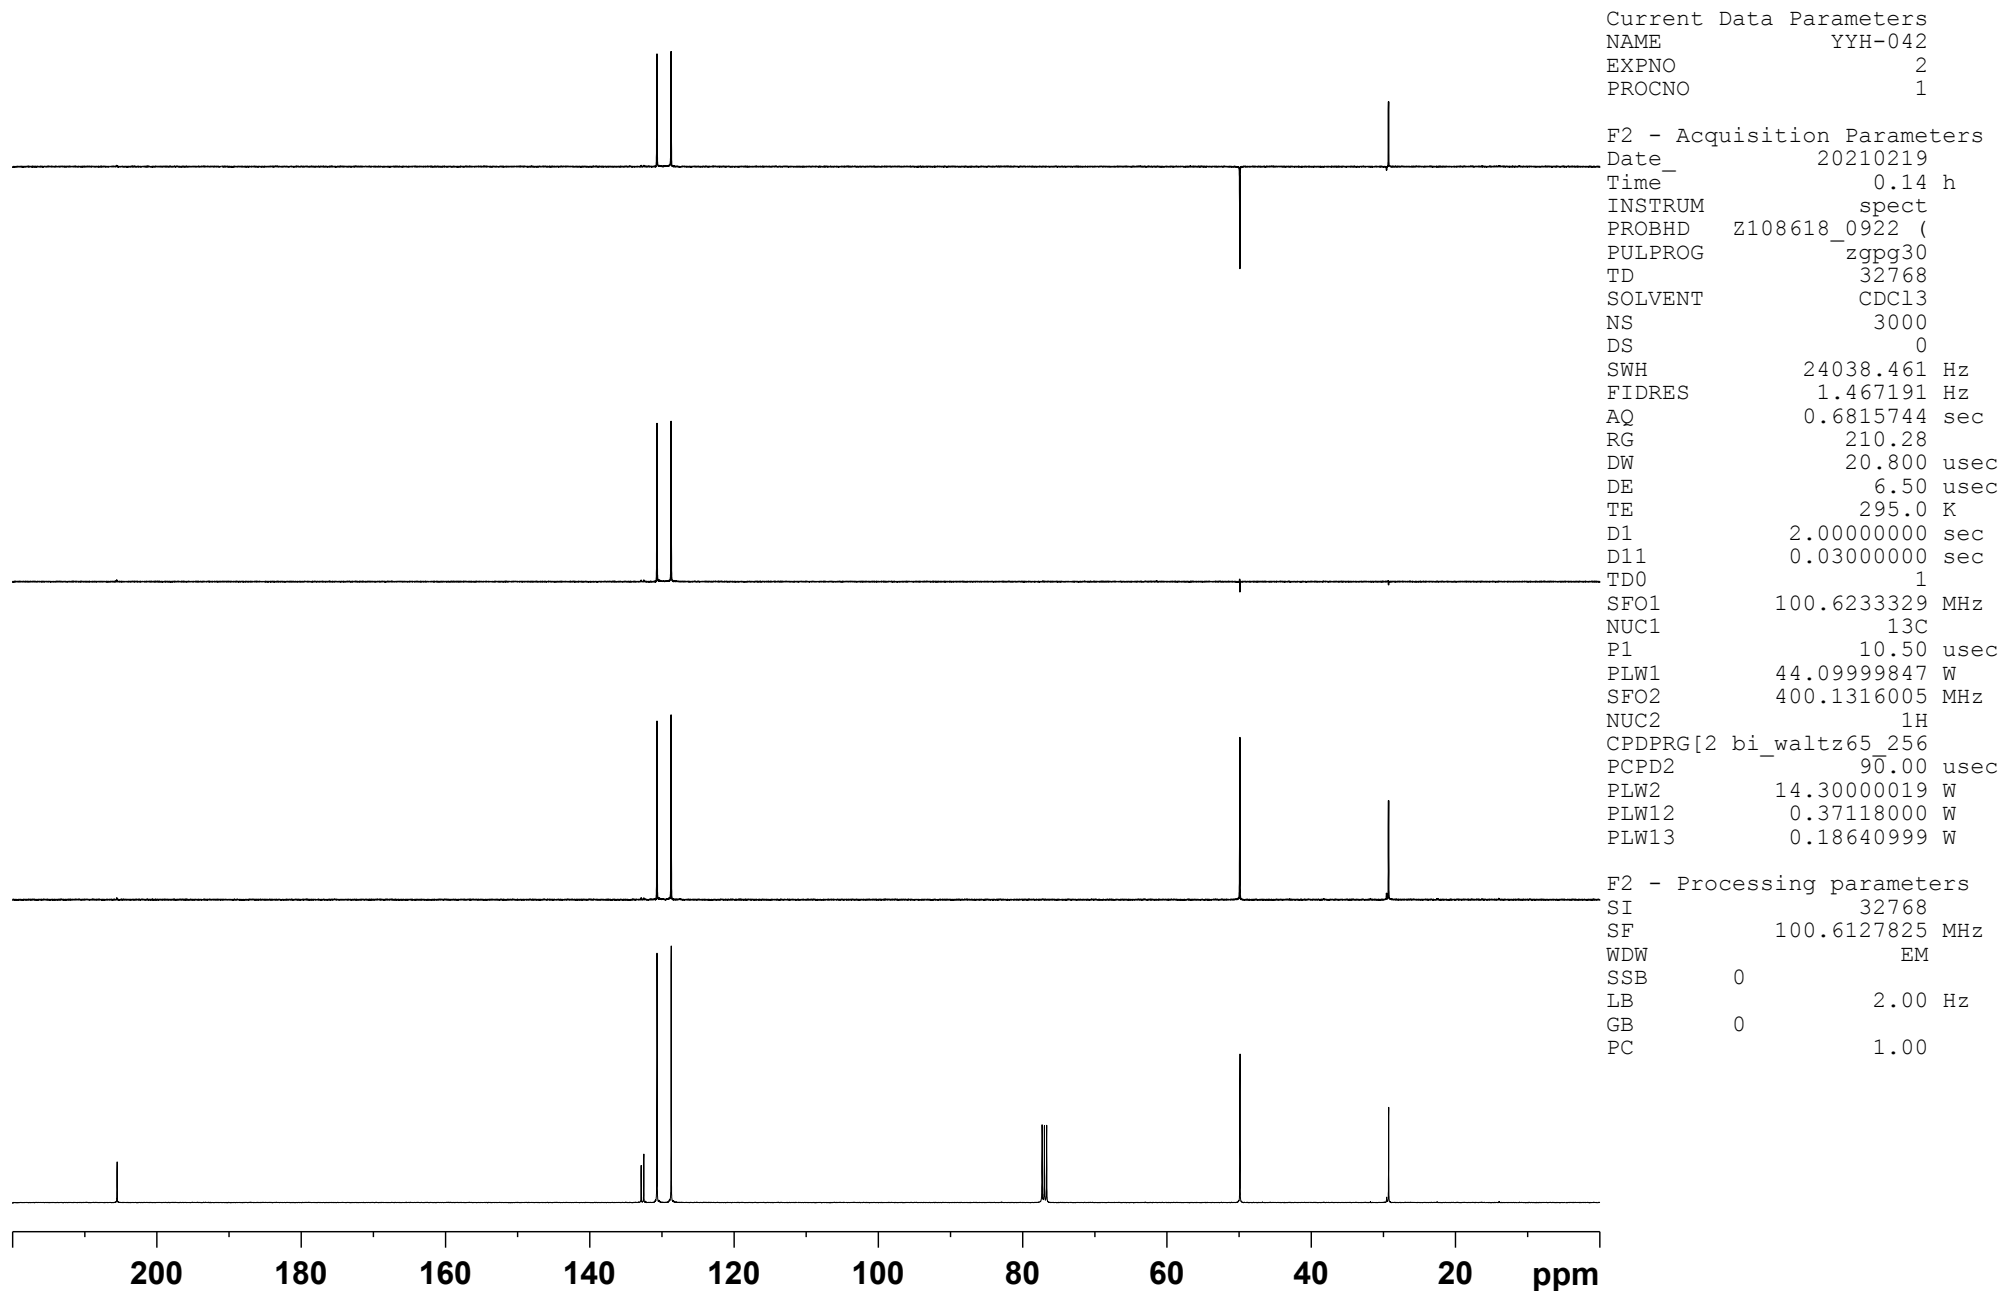



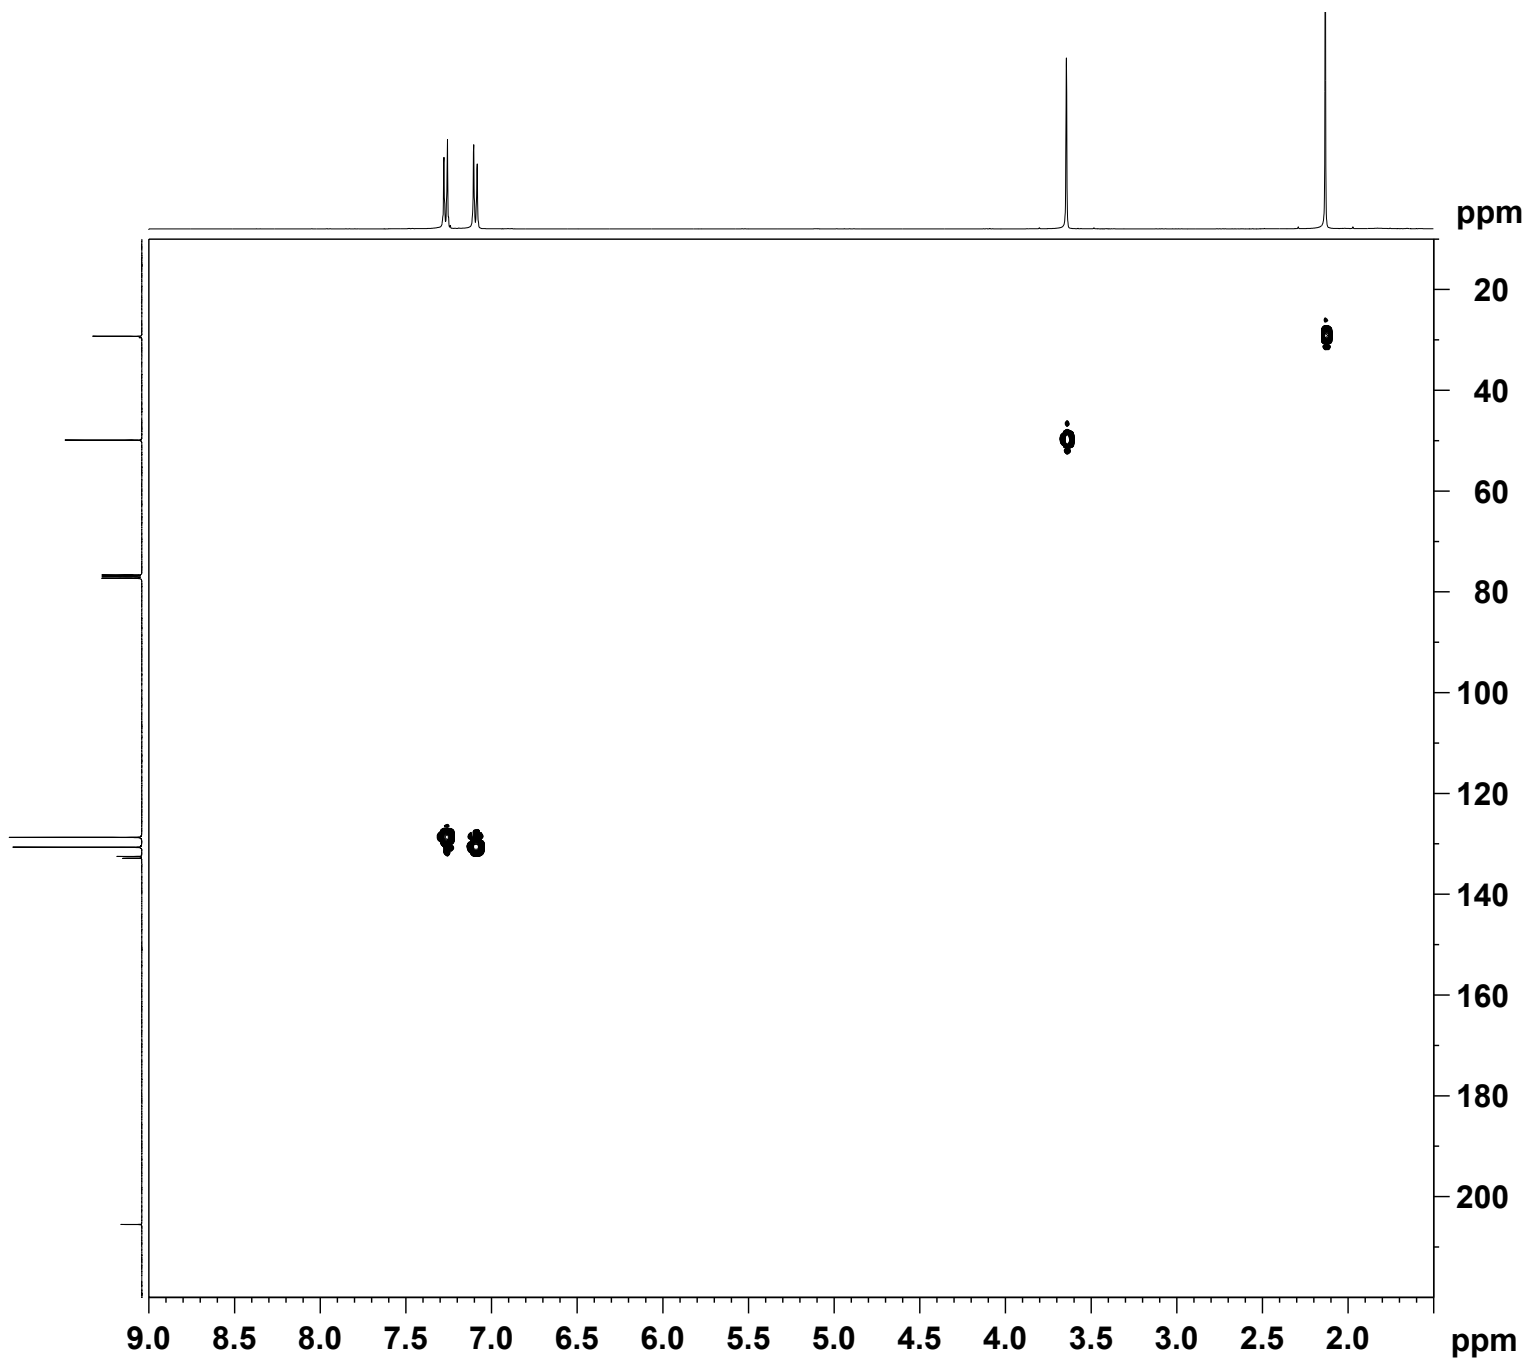

HSQC of compound 4a

```

Current Data Parameters
NAME          YYH-042
EXPNO         6
PROCNO        1

F2 - Acquisition Parameters
Date_         20210219
Time          2.33 h
INSTRUM       spect
PROBHD        Z108618_0922 (
PULPROG       hsqcetgpsisp2.2
TD            2048
SOLVENT       CDCl3
NS            6
DS            16
SWH           8012.820 Hz
FIDRES        7.825020 Hz
AQ            0.1277952 sec
RG            210.28
DW            62.400 usec
DE            6.50 usec
TE            295.0 K
CNST2         145.0000000
CNST17        -0.5000000
D0            0.00000300 sec
D1            1.50000000 sec
D4            0.00172414 sec
D11           0.03000000 sec
D16           0.00020000 sec
D24           0.00086207 sec
IN0           0.00002080 sec
TDav          1
SFO1          400.1324008 MHz
NUC1          1H
P1            14.50 usec
P2            29.00 usec
P28           1000.00 usec
PLW1          12.69999981 W
SFO2          100.6233329 MHz
NUC2          13C
CPDPRG[2]     garp
P3            10.50 usec
P14           500.00 usec
P24           2000.00 usec
PCPD2         80.00 usec
PLW0          0 W
PLW2          44.00000000 W
PLW12         0.75796998 W
SPNAM[3]      Crp60,0.5,20.1
SFOAL3        0.500
SPOFFS3       0 Hz
SPW3          7.41179991 W
SPNAM[7]      Crp60comp.4
SFOAL7        0.500
SPOFFS7       0 Hz
SPW7          7.41179991 W
GPNAM[1]      SMSQ10.100
GPZ1          80.00 %
GPNAM[2]      SMSQ10.100
GPZ2          20.10 %
GPNAM[3]      SMSQ10.100
GPZ3          11.00 %
GPNAM[4]      SMSQ10.100
GPZ4          -5.00 %
P16           1000.00 usec
P19           600.00 usec

F1 - Acquisition parameters
TD            256
SFO1          100.6233 MHz
FIDRES        187.800476 Hz
SW            238.896 ppm
FnMODE        Echo-Antiecho

F2 - Processing parameters
SI            1024
SF            400.1300178 MHz
WDW           QSINE
SSB           2
LB            0 Hz
GB            0
PC            1.40

F1 - Processing parameters
SI            1024
MC2           echo-antiecho
SF            100.6127825 MHz
WDW           QSINE
SSB           2
LB            0 Hz
GB            0

```

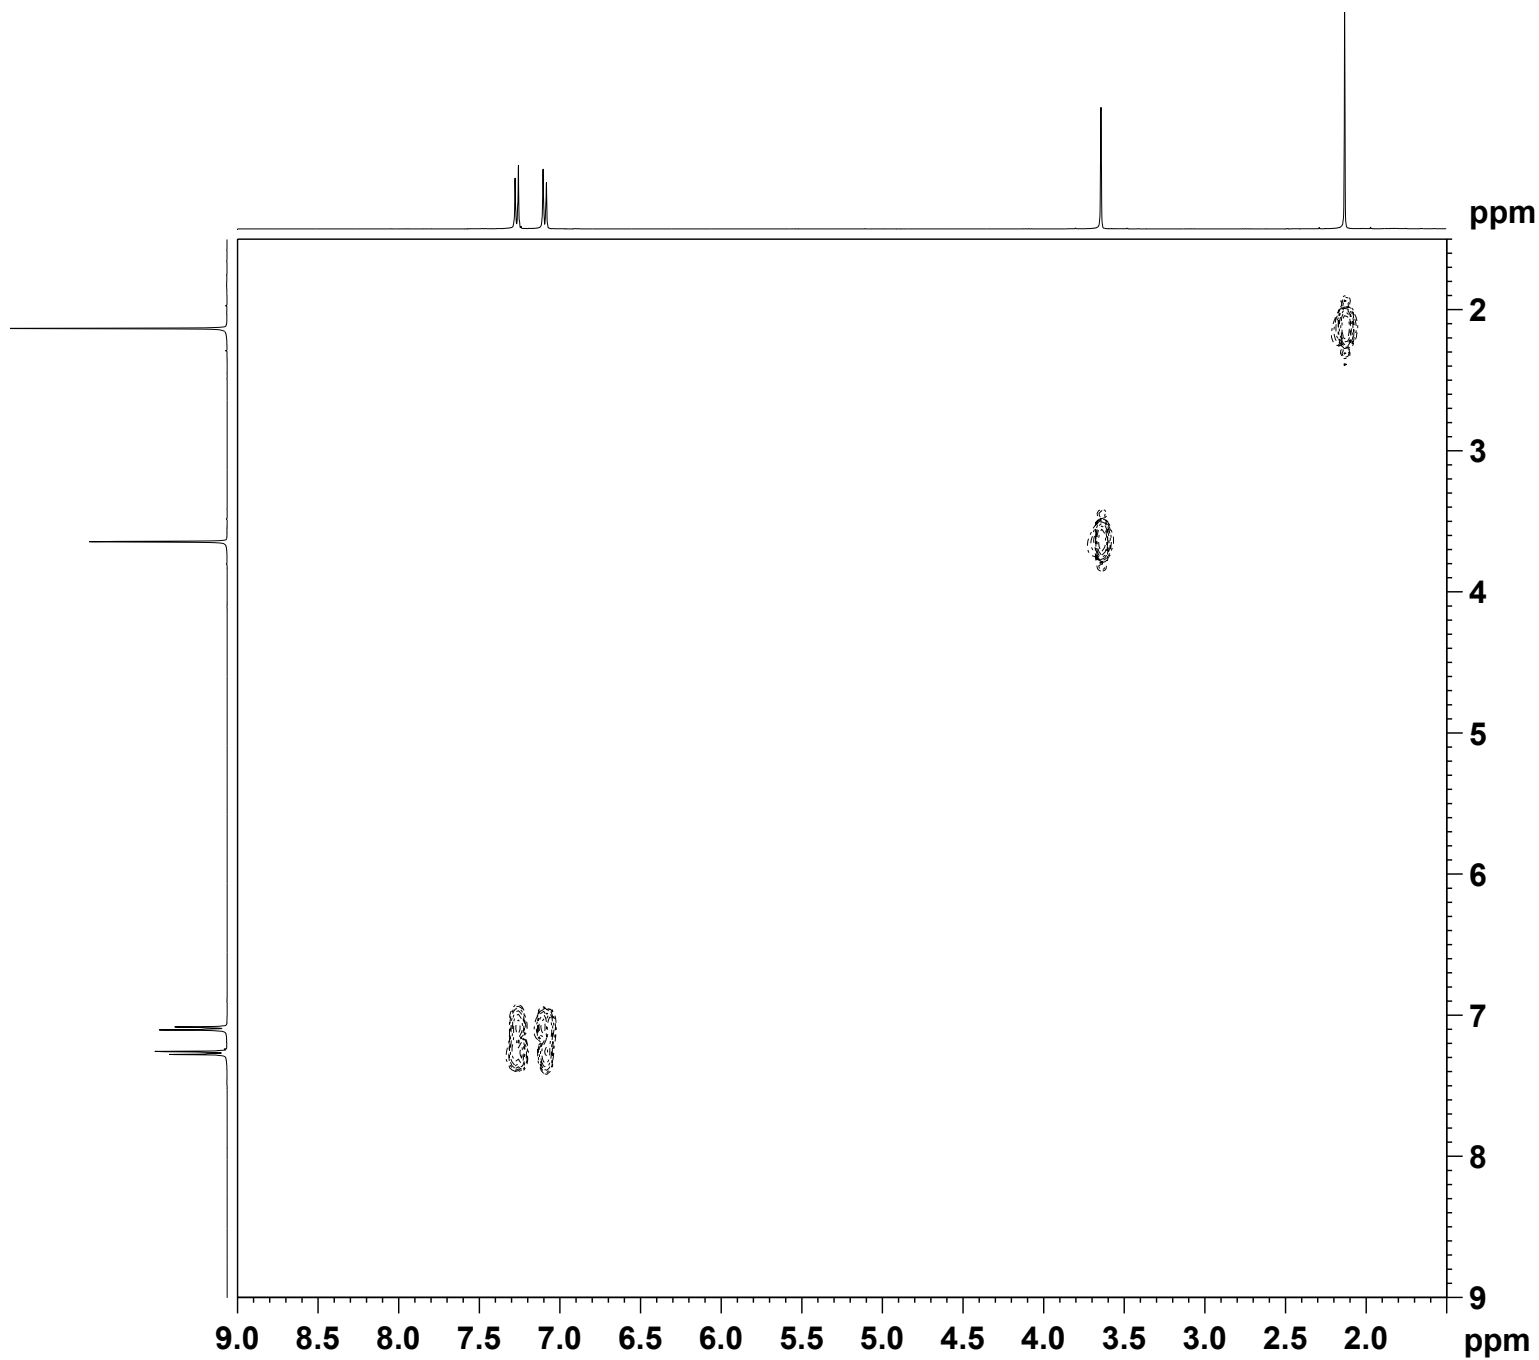

COSY of compound 4a

Current Data Parameters  
 NAME YYH-042  
 EXPNO 7  
 PROCNO 1

## F2 - Acquisition Parameters

Date\_ 20210219  
 Time 3.16 h  
 INSTRUM spect  
 PROBHD Z108618 0922 (  
 PULPROG cosygpppqf  
 TD 2048  
 SOLVENT CDCl3  
 NS 6  
 DS 16  
 SWH 8012.820 Hz  
 FIDRES 7.825020 Hz  
 AQ 0.1277952 sec  
 RG 144.47  
 DW 62.400 usec  
 DE 6.50 usec  
 TE 295.0 K  
 D0 0.00000300 sec  
 D1 2.00000000 sec  
 D11 0.03000000 sec  
 D12 0.00002000 sec  
 D13 0.00000400 sec  
 D16 0.00020000 sec  
 IN0 0.00012480 sec  
 T Dav 1  
 SFO1 400.1324008 MHz  
 NUC1 1H  
 P0 14.50 usec  
 P1 14.50 usec  
 P17 2500.00 usec  
 PLW1 12.69999981 W  
 PLW10 2.96690011 W  
 GPNAM[1] SMSQ10.100  
 GPZ1 10.00 %  
 P16 1000.00 usec

## F1 - Acquisition parameters

TD 256  
 SFO1 400.1324 MHz  
 FIDRES 62.600159 Hz  
 SW 20.025 ppm  
 FnmODE QF

## F2 - Processing parameters

SI 1024  
 SF 400.1300178 MHz  
 WDW QSINE  
 SSB 0  
 LB 0 Hz  
 GB 0  
 PC 1.40

## F1 - Processing parameters

SI 1024  
 MC2 QF  
 SF 400.1300178 MHz  
 WDW QSINE  
 SSB 0  
 LB 0 Hz  
 GB 0

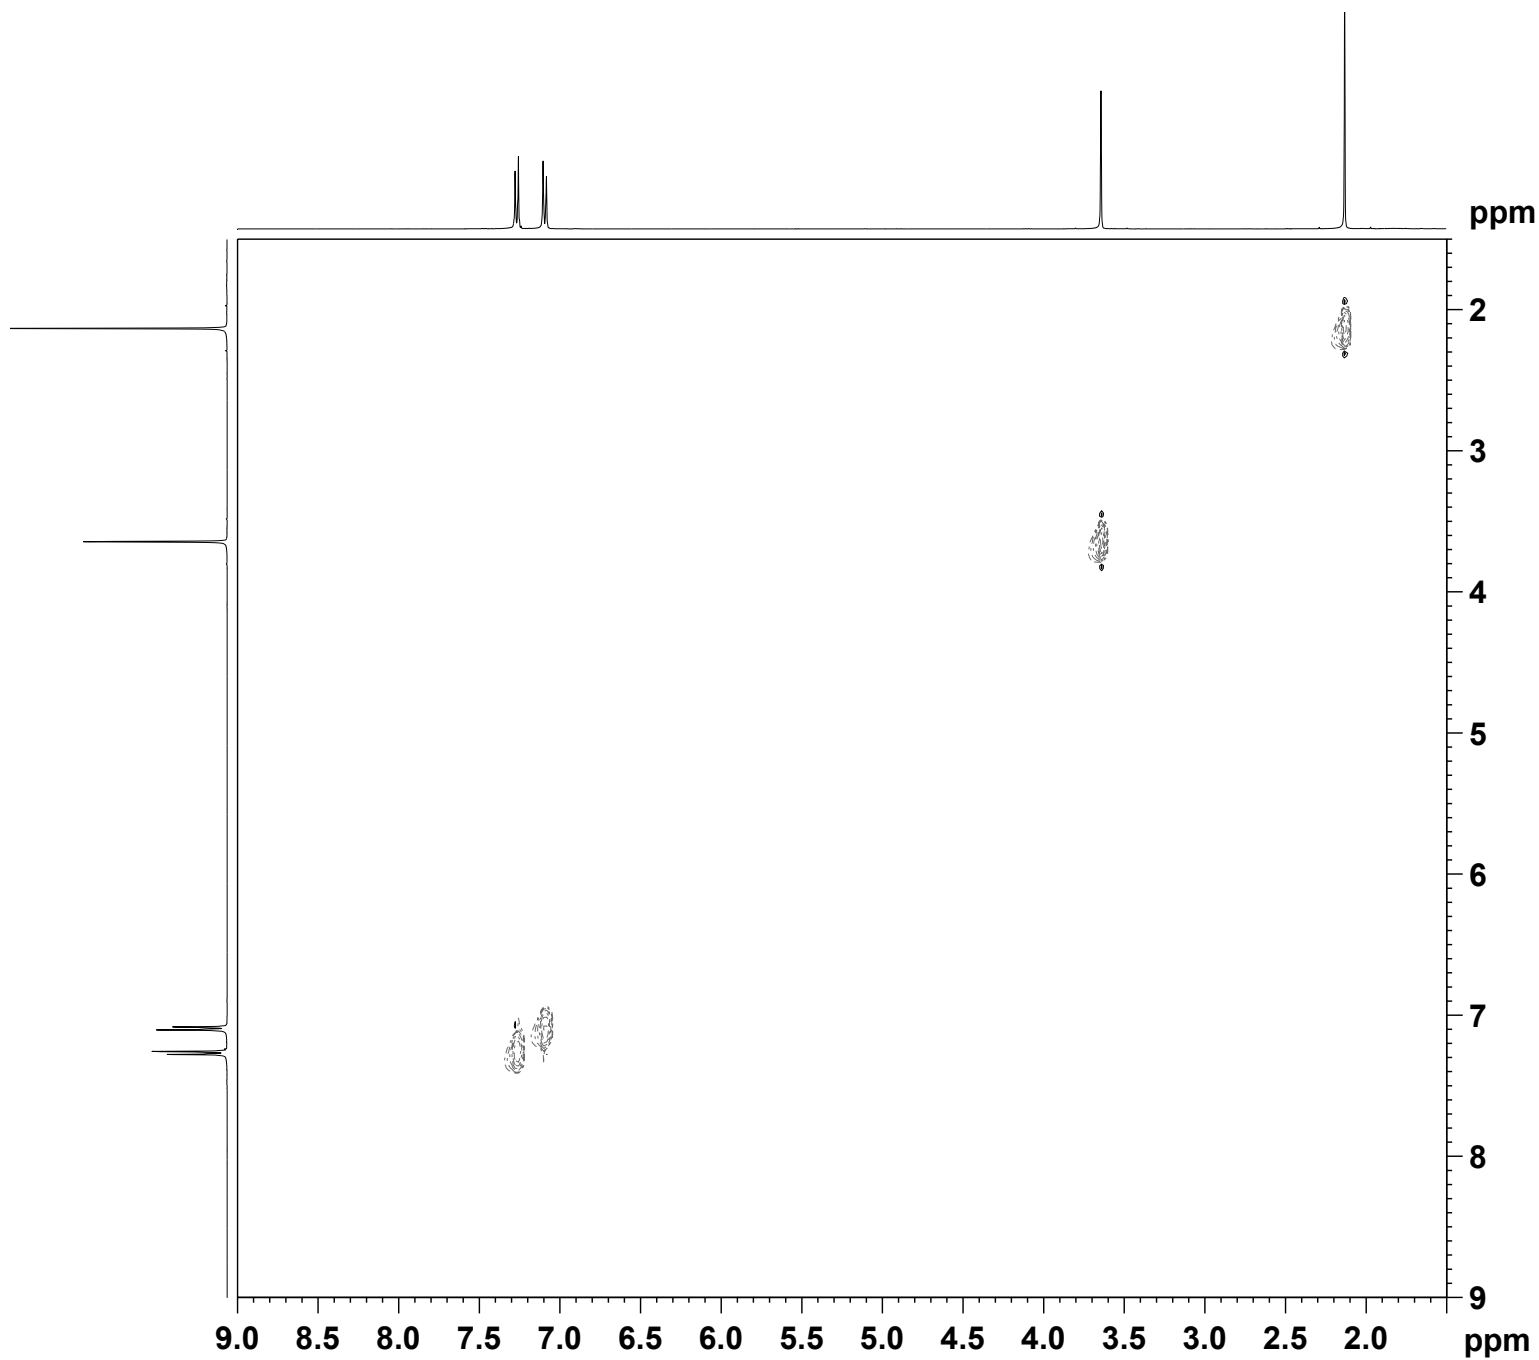

Current Data Parameters  
 NAME YYH-042  
 EXPNO 8  
 PROCNO 1

## F2 - Acquisition Parameters

Date 20210219  
 Time 4.13 h  
 INSTRUM spect  
 PROBHD Z108618\_0922 (  
 PULPROG noesygpphpp  
 TD 2048  
 SOLVENT CDCl3  
 NS 6  
 DS 16  
 SWH 8012.820 Hz  
 FIDRES 7.825020 Hz  
 AQ 0.1277952 sec  
 RG 63.35  
 DW 62.400 usec  
 DE 6.50 usec  
 TE 294.3 K  
 D0 0.00004394 sec  
 D1 2.00000000 sec  
 D8 0.40000001 sec  
 D11 0.03000000 sec  
 D12 0.00002000 sec  
 D16 0.00020000 sec  
 IN0 0.00012480 sec  
 TDev 1  
 SFO1 400.1324008 MHz  
 NUC1 1H  
 P1 14.50 usec  
 P2 29.00 usec  
 P17 2500.00 usec  
 PLW1 12.69999981 W  
 PLW10 2.96690011 W  
 GPNAM[1] SMSQ10.100  
 GPZ1 40.00 %  
 P16 1000.00 usec

## F1 - Acquisition parameters

TD 256  
 SFO1 400.1324 MHz  
 FIDRES 62.600159 Hz  
 SW 20.025 ppm  
 FnMODE States-TPPI

## F2 - Processing parameters

SI 1024  
 SF 400.1300178 MHz  
 WDW QSINE  
 SSB 2  
 LB 0 Hz  
 GB 0  
 PC 1.40

## F1 - Processing parameters

SI 1024  
 MC2 States-TPPI  
 SF 400.1300178 MHz  
 WDW QSINE  
 SSB 2  
 LB 0 Hz  
 GB 0

Sample Name **YYH-063**  
Date collected **2021-06-02**

Pulse sequence **PROTON**  
Solvent **cdcl3**

Temperature **25**  
Spectrometer **Agilent-NMR-inova500**

Study owner **vnmr2**  
Operator **vnmr2**

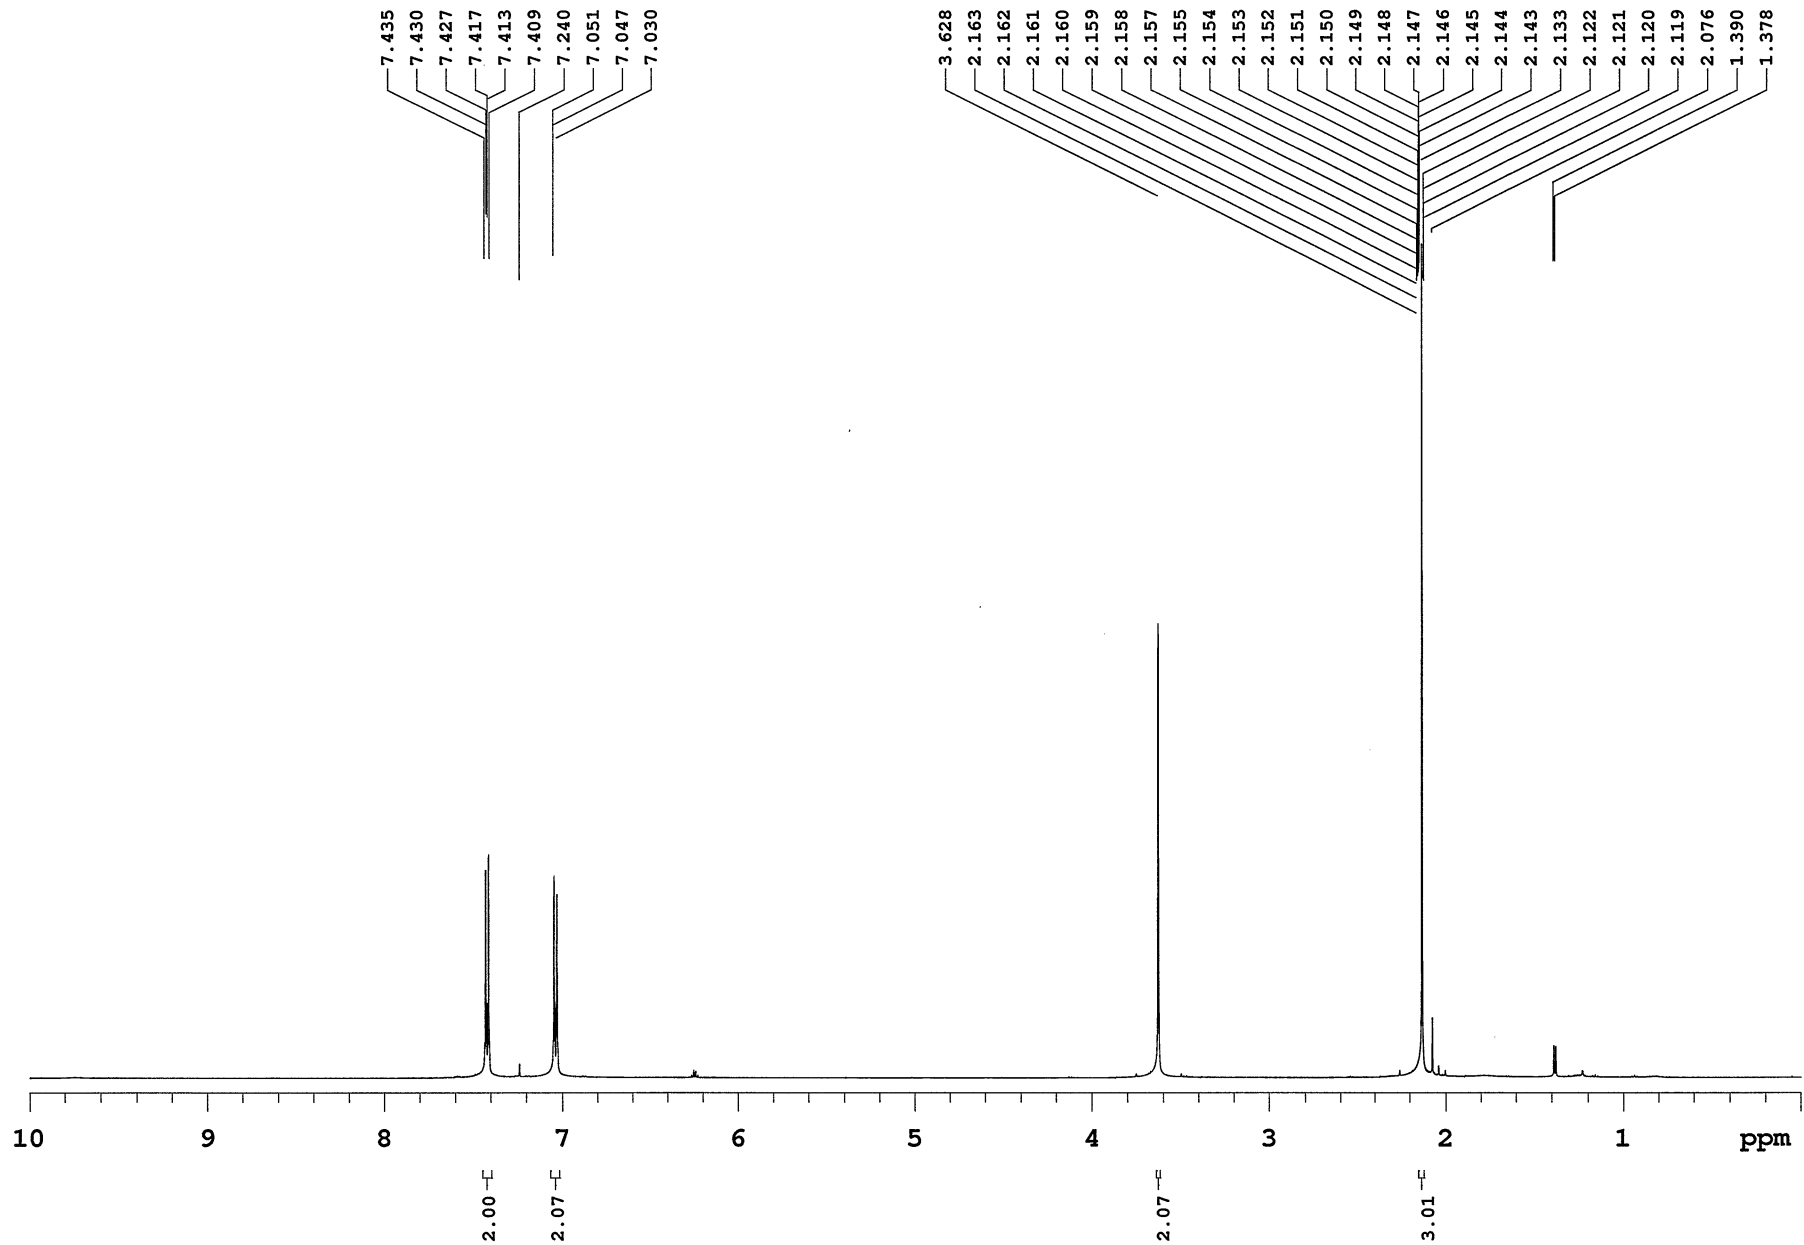

Sample Name YYH-063  
Date collected 2021-06-02

Pulse sequence CARBON  
Solvent cdcl3

Temperature 25  
Spectrometer Agilent-NMR-inova500

Study owner vnmr2  
Operator vnmr2

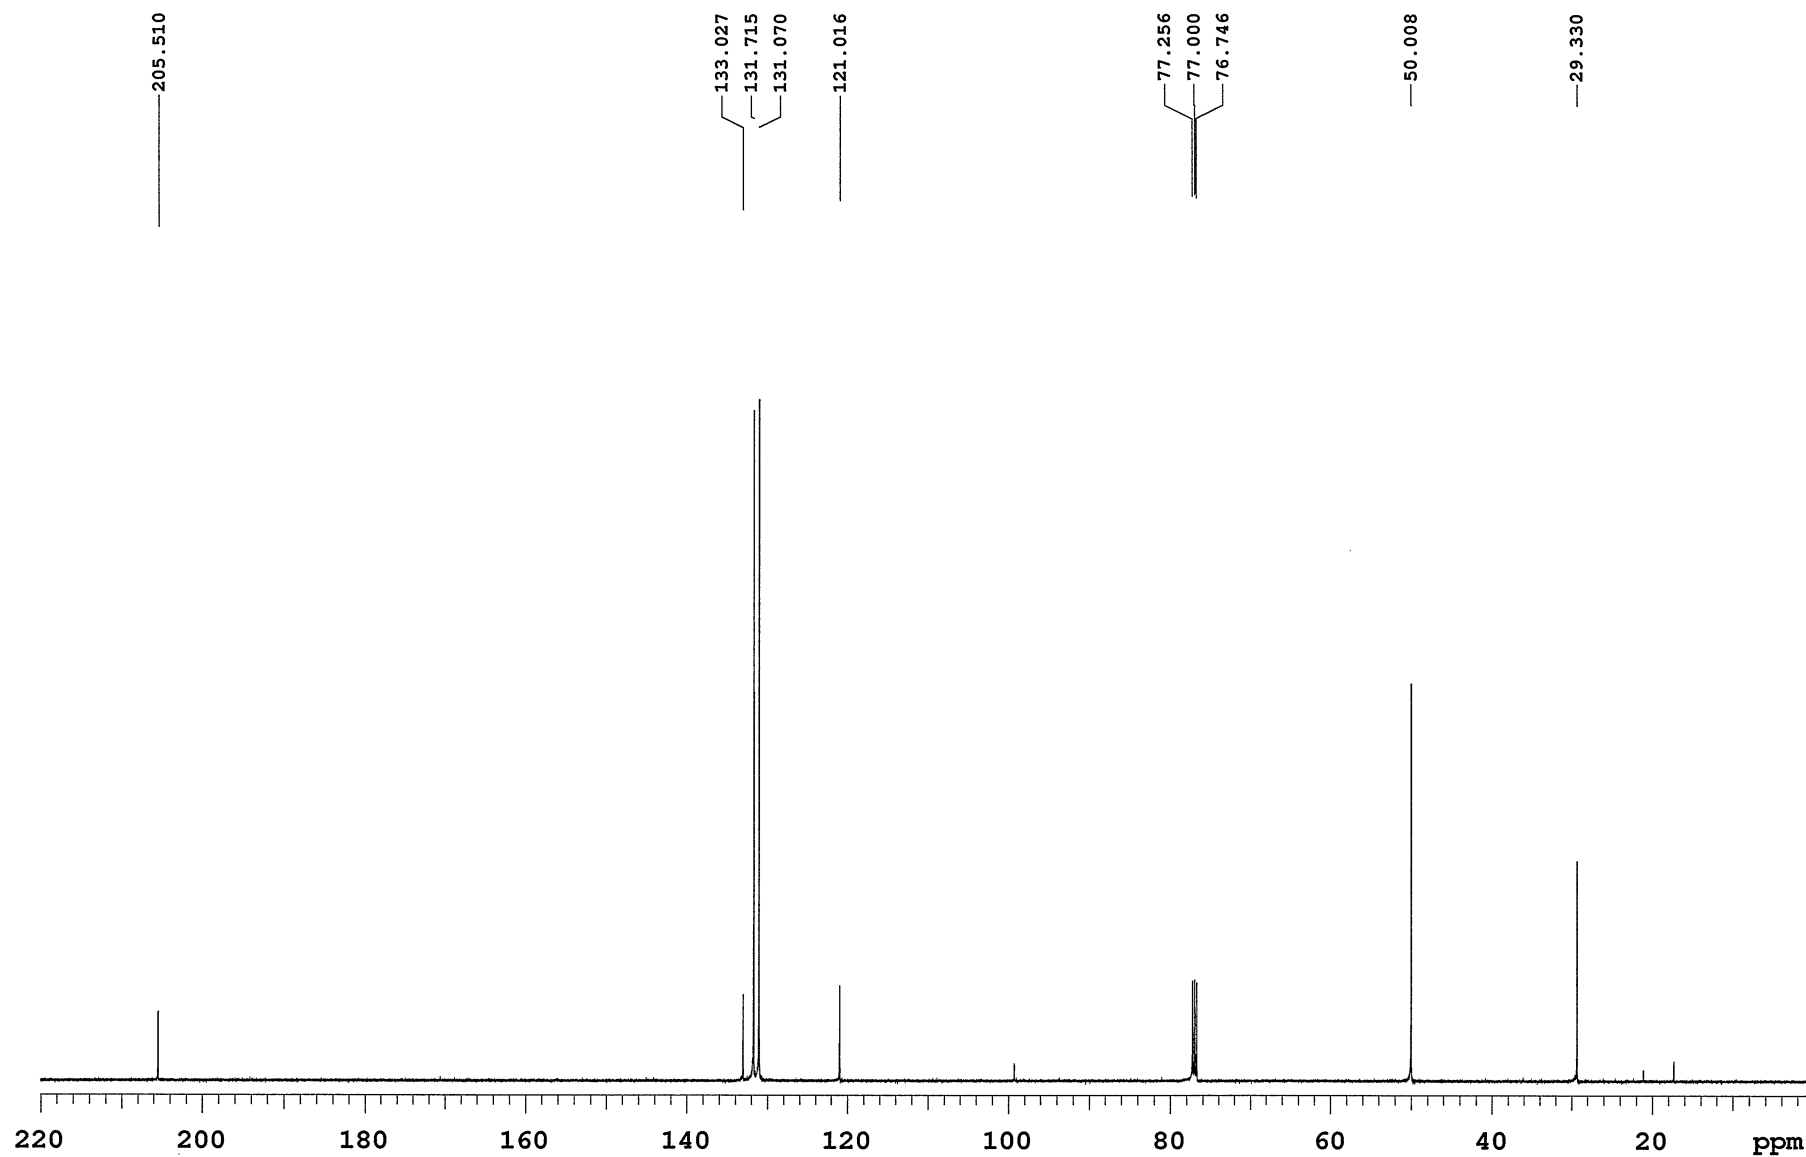

1H NMR (CDCl3, 125 MHz) of compound 4b

Sample Name **YYH-063**  
Date collected **2021-06-02**

Pulse sequence **DEPT**  
Solvent **cdcl3**

Temperature **25**  
Spectrometer **Agilent-NMR-inova500**

Study owner **vnmr2**  
Operator **vnmr2**

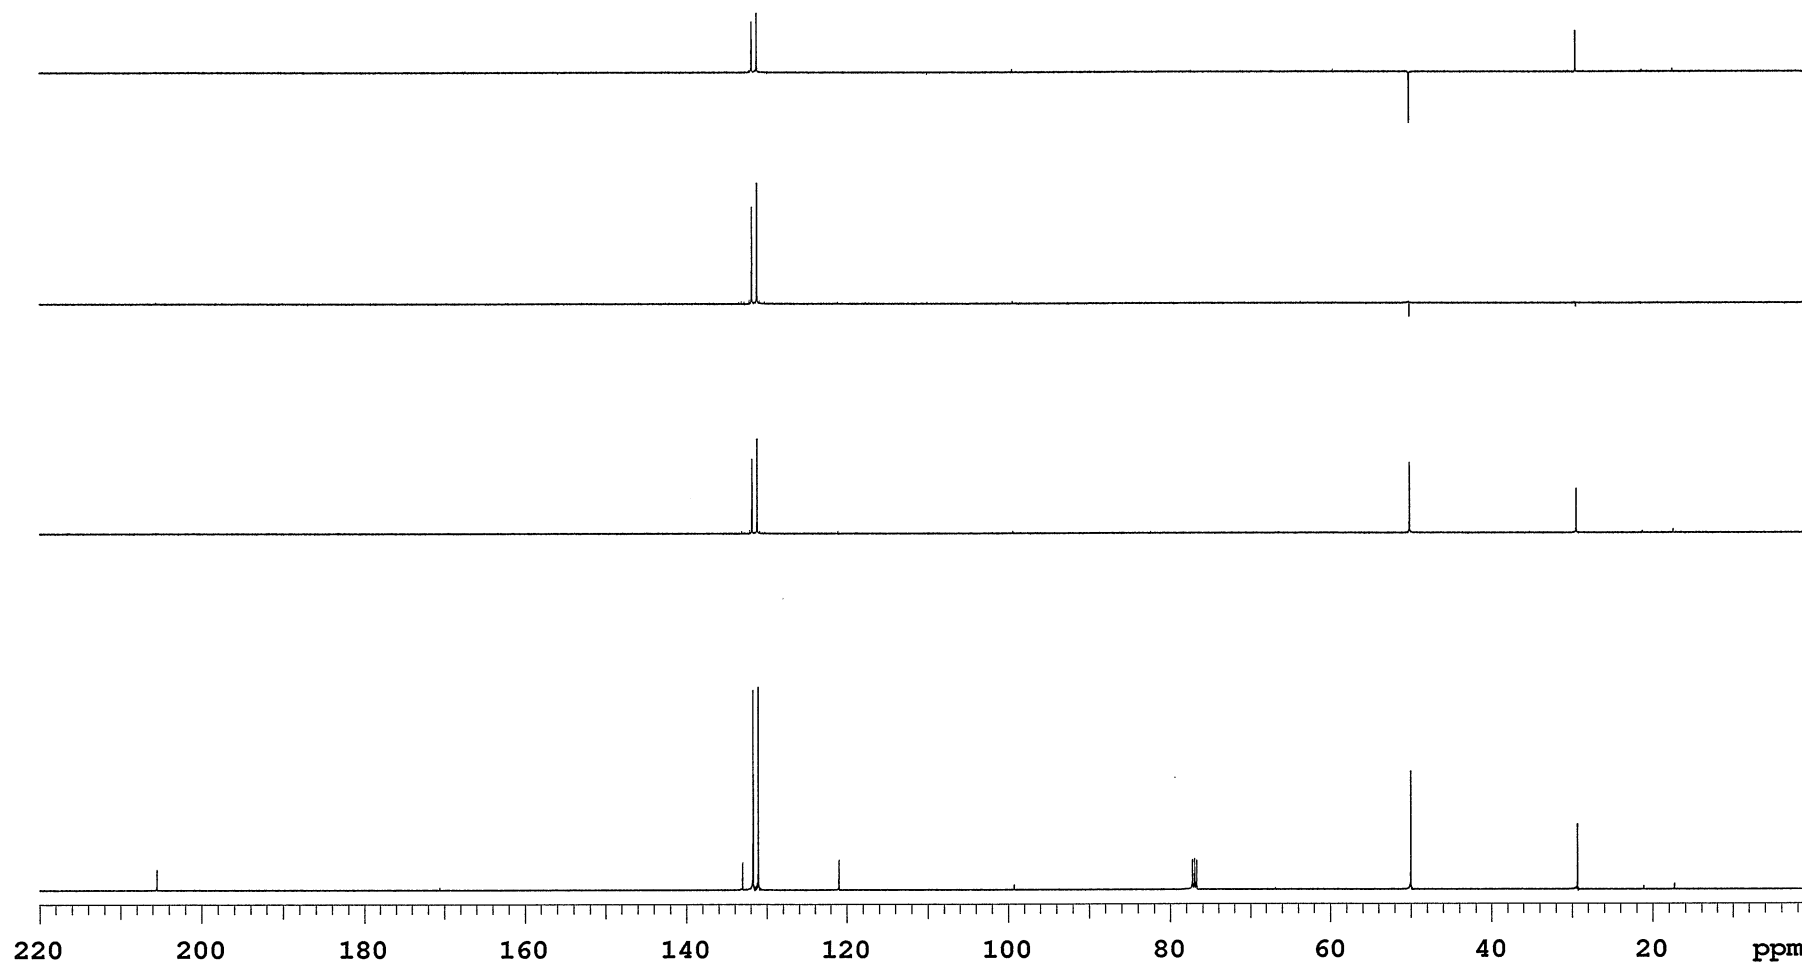DEPT of compound **4b**

Sample Name **YYH-063**  
Date collected **2021-06-03**

Pulse sequence **gHSQC**  
Solvent **cdcl3**

Temperature **25**  
Spectrometer **Agilent-NMR-inova500**

Study owner **vnmr2**  
Operator **vnmr2**

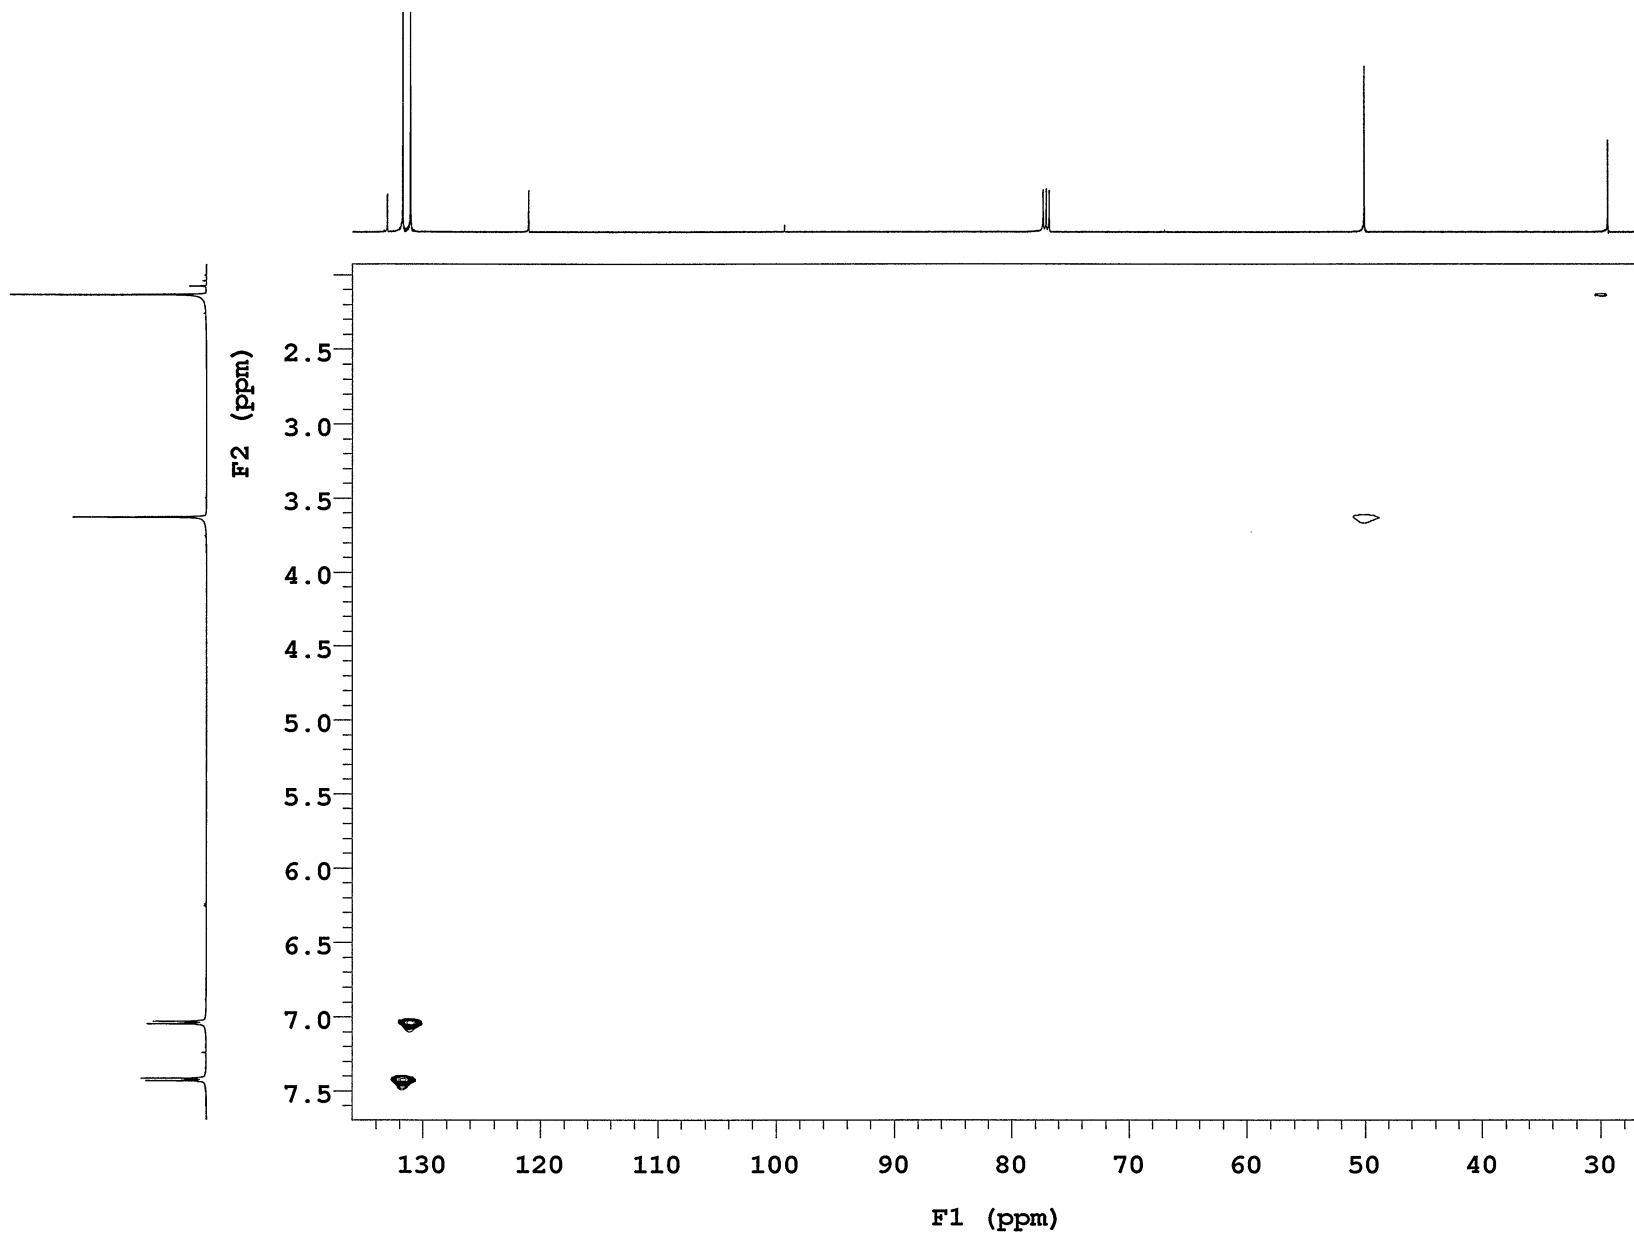HSQC of compound **4b**

Sample Name **YYH-063**  
Date collected **2021-06-03**

Pulse sequence **gCOSY**  
Solvent **cdcl3**

Temperature **25**  
Spectrometer **Agilent-NMR-inova500**

Study owner **vnmr2**  
Operator **vnmr2**

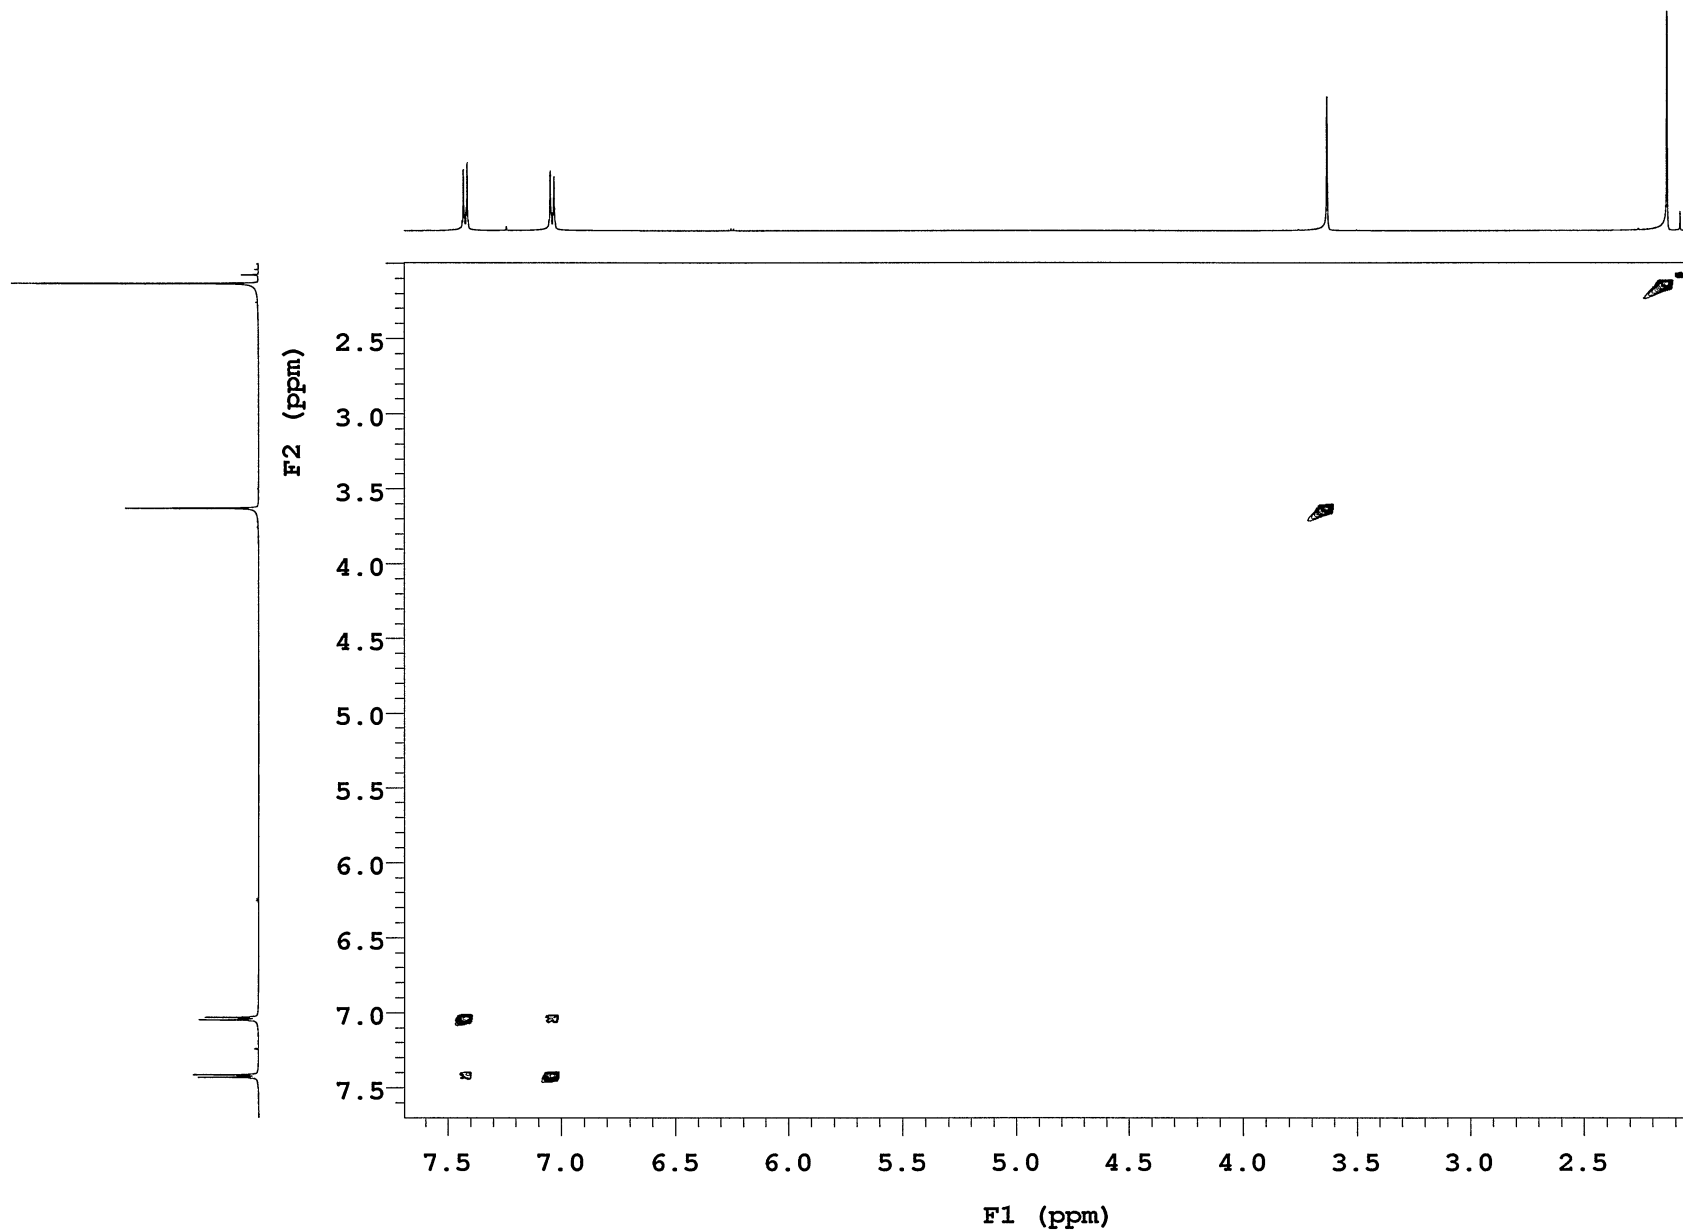COSY of compound **4b**



Sample Name **YYH-063**  
Date collected **2021-06-03**

Pulse sequence **NOESY**  
Solvent **cdcl3**

Temperature **25**  
Spectrometer **Agilent-NMR-inova500**

Study owner **vnmr2**  
Operator **vnmr2**

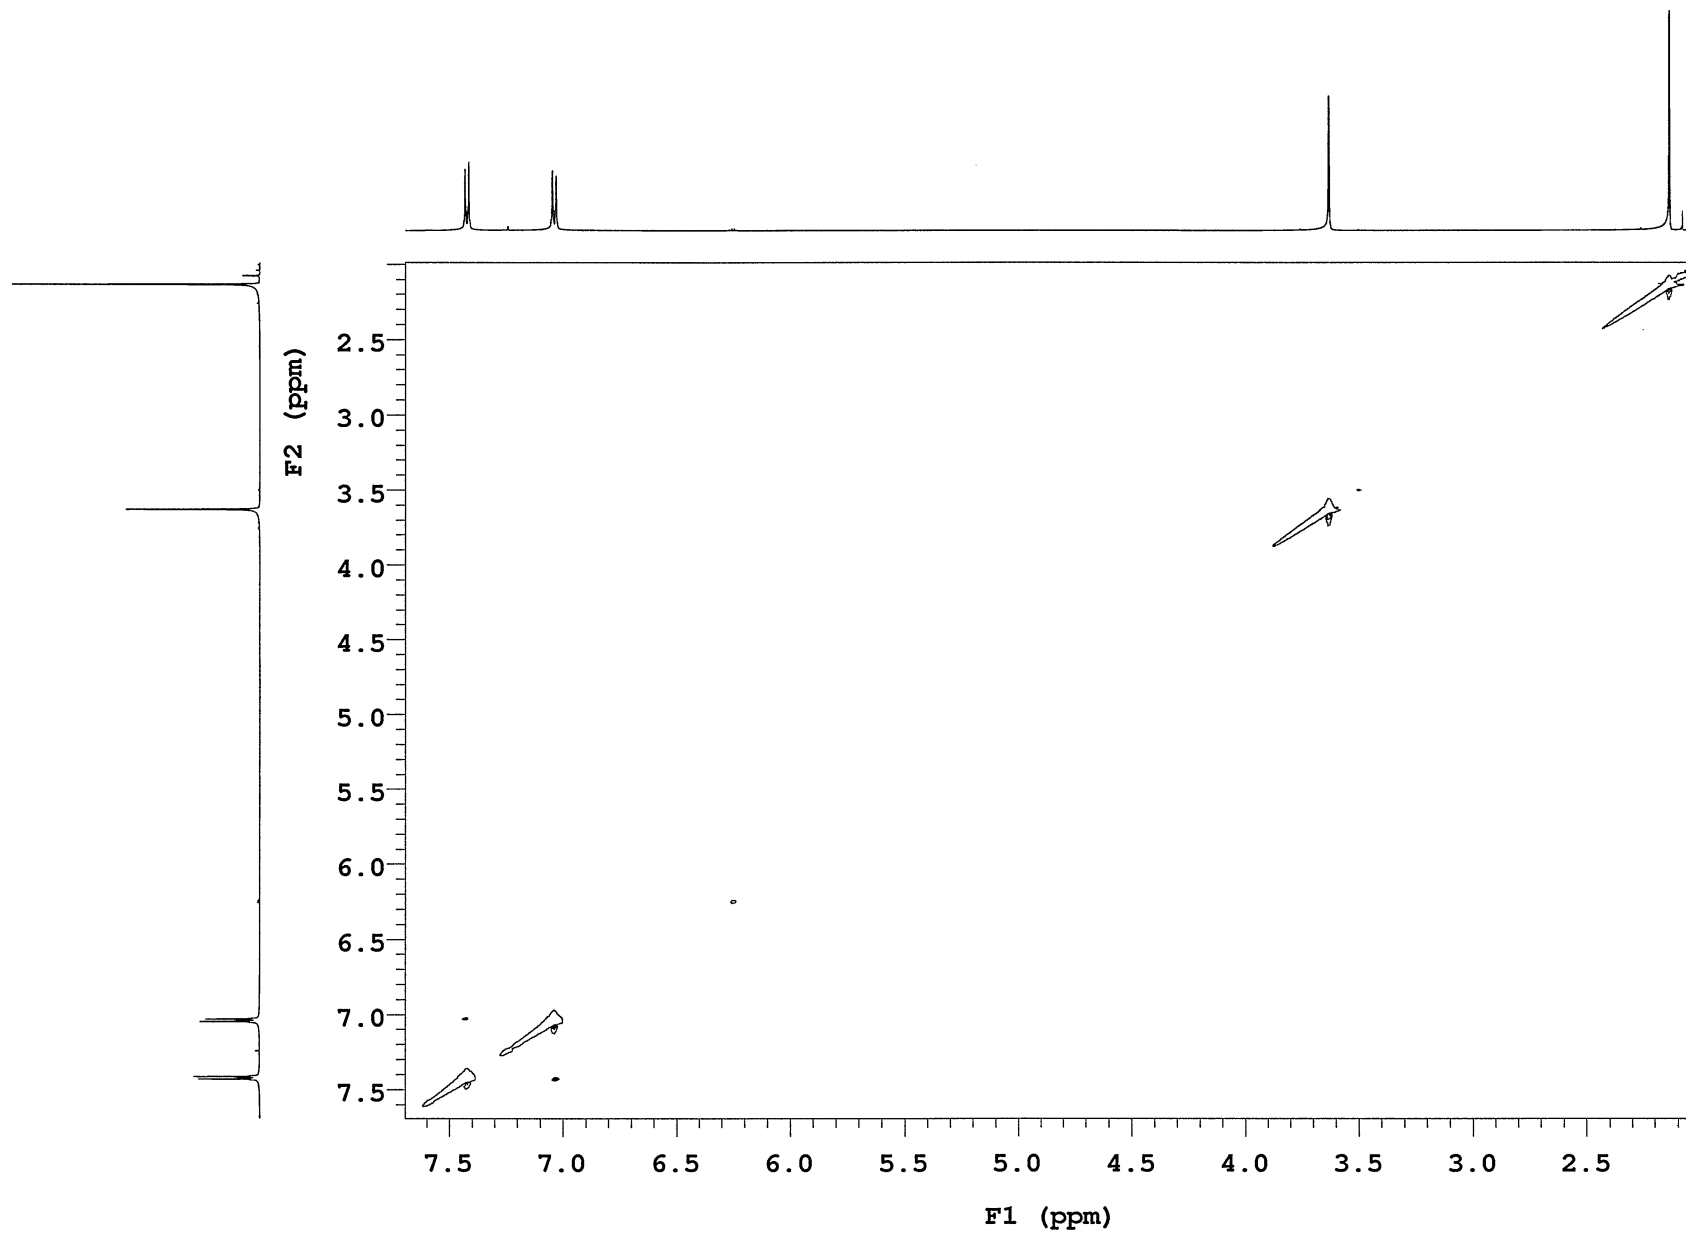

NOESY of compound 4b

1H NMR (CDCl3, 400 MHz) of compound 4c

S78

7.238  
7.105  
7.088  
7.084  
6.860  
6.855  
6.843  
6.838

3.776  
3.608

2.116

Current Data Parameters  
NAME YYH-077  
EXPNO 1  
PROCNO 1

F2 - Acquisition Parameters  
Date\_ 20210819  
Time\_ 22.56 h  
INSTRUM spect  
PROBHD z108618\_0922 (  
PULPROG zg30  
TD 32768  
SOLVENT CDC13  
NS 16  
DS 0  
SWH 8012.820 Hz  
FIDRES 0.489064 Hz  
AQ 2.0447233 sec  
RG 210.28  
DW 62.400 usec  
DE 16.43 usec  
TE 297.5 K  
D1 2.00000000 sec  
TD0 1  
SFO1 400.1324008 MHz  
NUC1 1H  
P1 14.50 usec  
PLW1 13.10000038 W

F2 - Processing parameters  
SI 16384  
SF 400.1300189 MHz  
WDW EM  
SSB 0  
LB 0 Hz  
GB 0  
PC 1.00

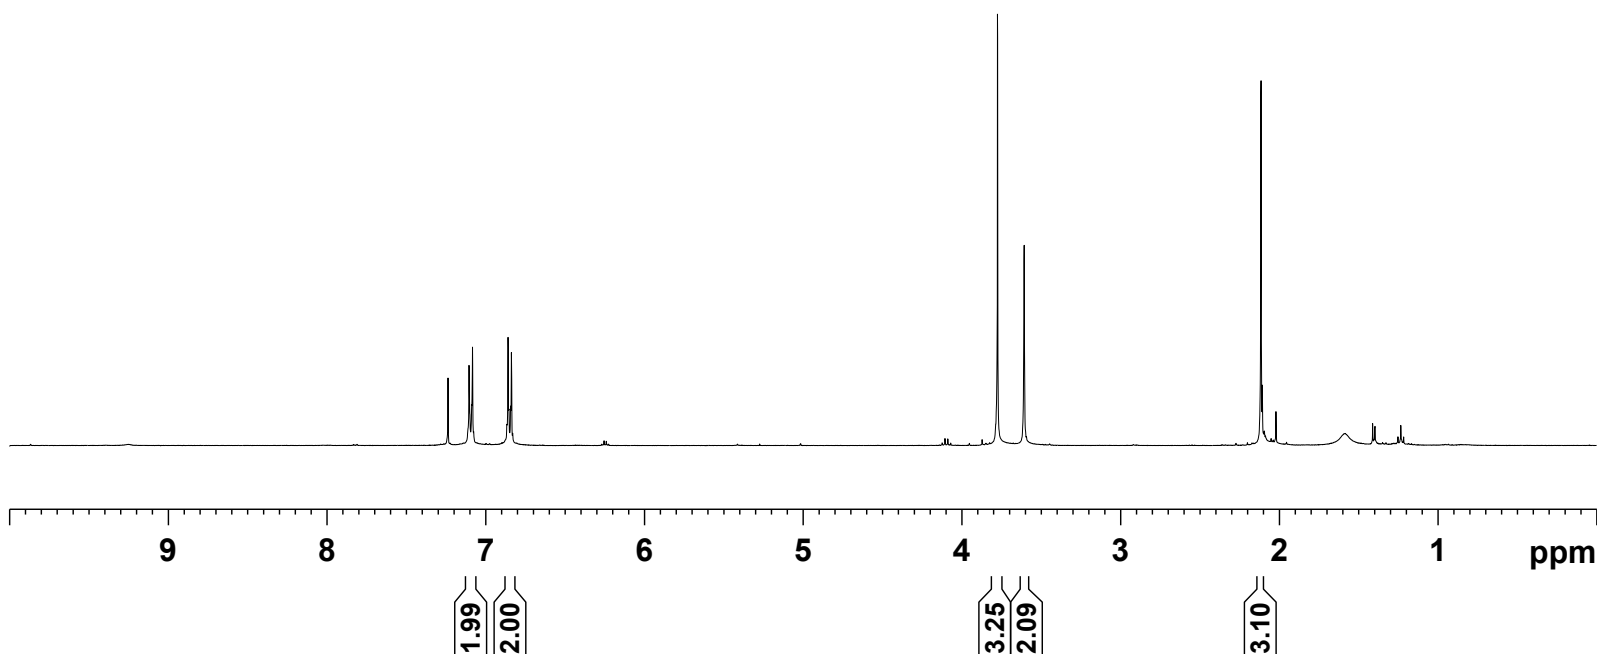

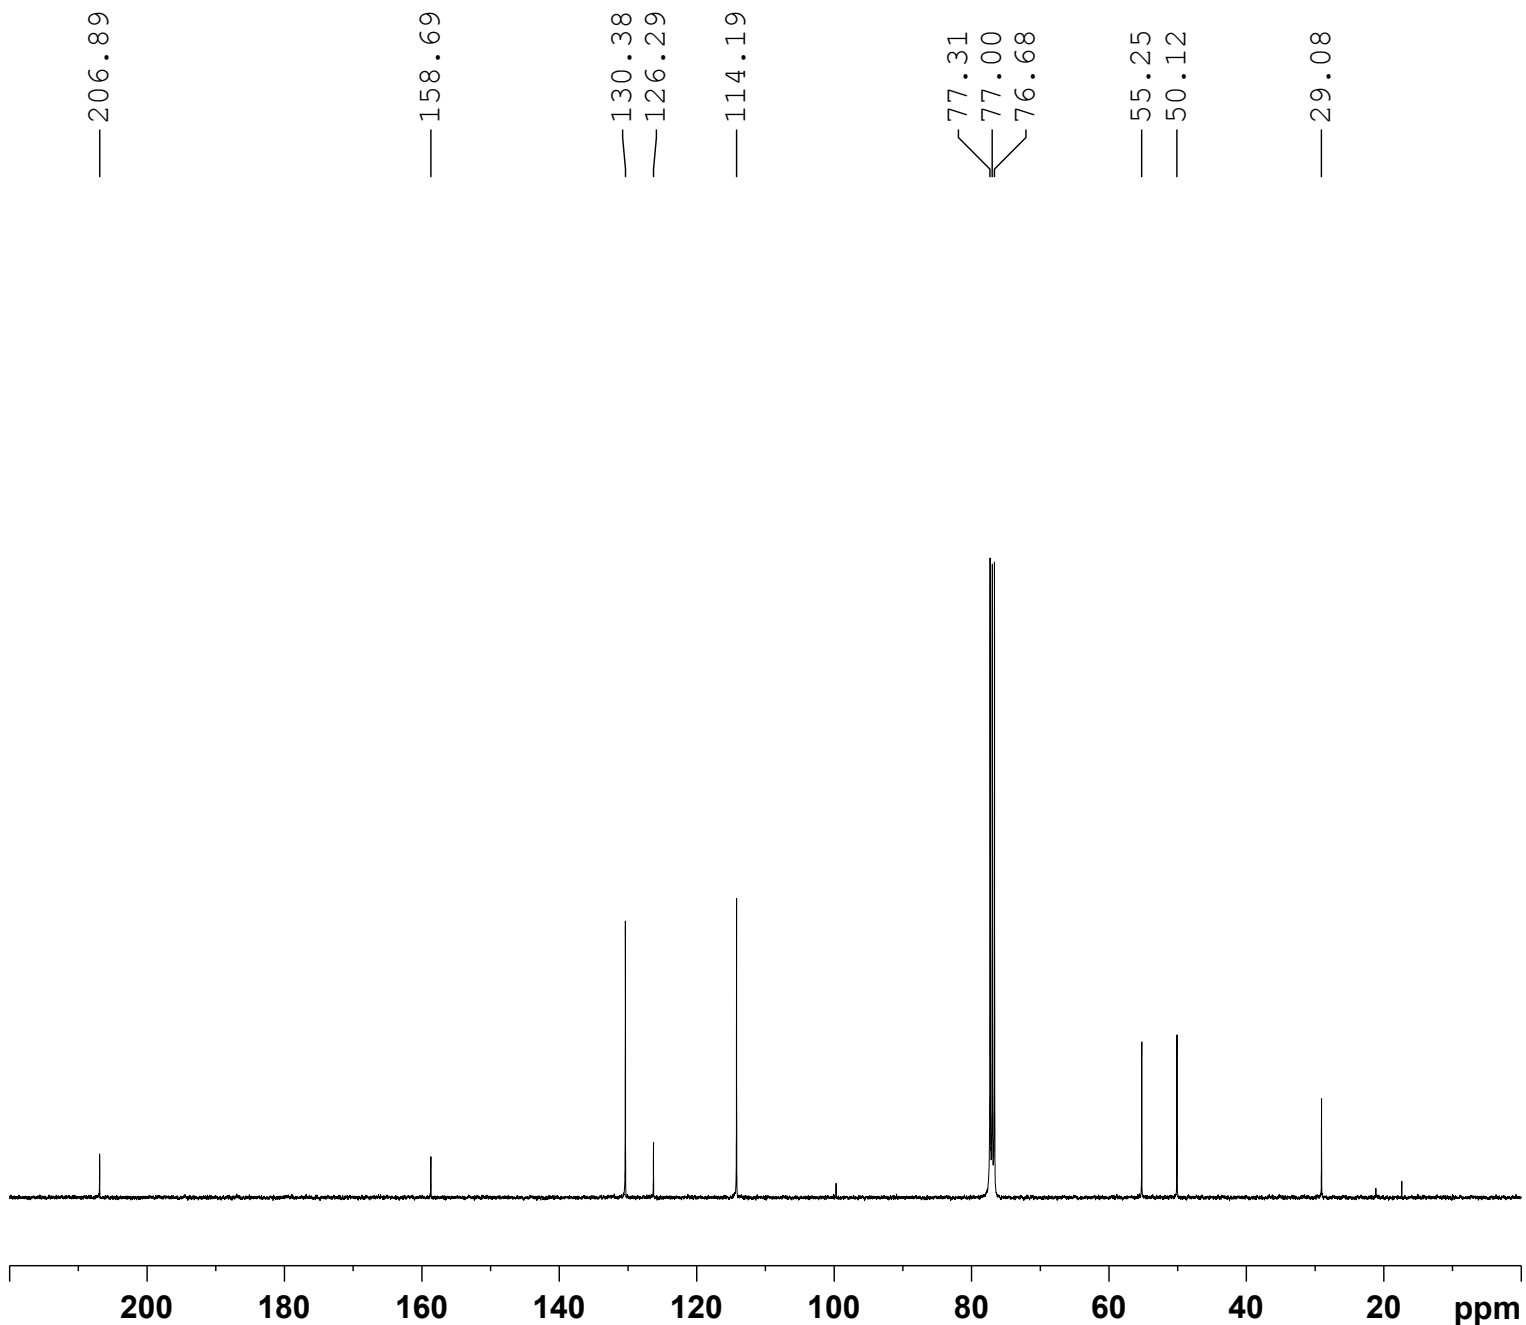

$^{13}\text{C}$  NMR ( $\text{CDCl}_3$ , 100 MHz) of compound **4c**

Current Data Parameters  
 NAME YYH-077  
 EXPNO 2  
 PROCNO 1

F2 - Acquisition Parameters  
 Date\_ 20210604  
 Time\_ 1.03 h  
 INSTRUM spect  
 PROBHD z108618\_0922 (  
 PULPROG zgpg30  
 TD 32768  
 SOLVENT  $\text{CDCl}_3$   
 NS 4000  
 DS 0  
 SWH 24038.461 Hz  
 FIDRES 1.467191 Hz  
 AQ 0.6815744 sec  
 RG 210.28  
 DW 20.800 usec  
 DE 6.50 usec  
 TE 296.9 K  
 D1 2.00000000 sec  
 D11 0.03000000 sec  
 TD0 1  
 SFO1 100.6233329 MHz  
 NUC1  $^{13}\text{C}$   
 P1 10.50 usec  
 PLW1 44.29999924 W  
 SFO2 400.1316005 MHz  
 NUC2  $^1\text{H}$   
 CPDPRG[2] bi\_waltz65\_256  
 PCPD2 90.00 usec  
 PLW2 14.60000038 W  
 PLW12 0.37897000 W  
 PLW13 0.19032000 W

F2 - Processing parameters  
 SI 32768  
 SF 100.6127712 MHz  
 WDW EM  
 SSB 0  
 LB 2.00 Hz  
 GB 0  
 PC 1.00

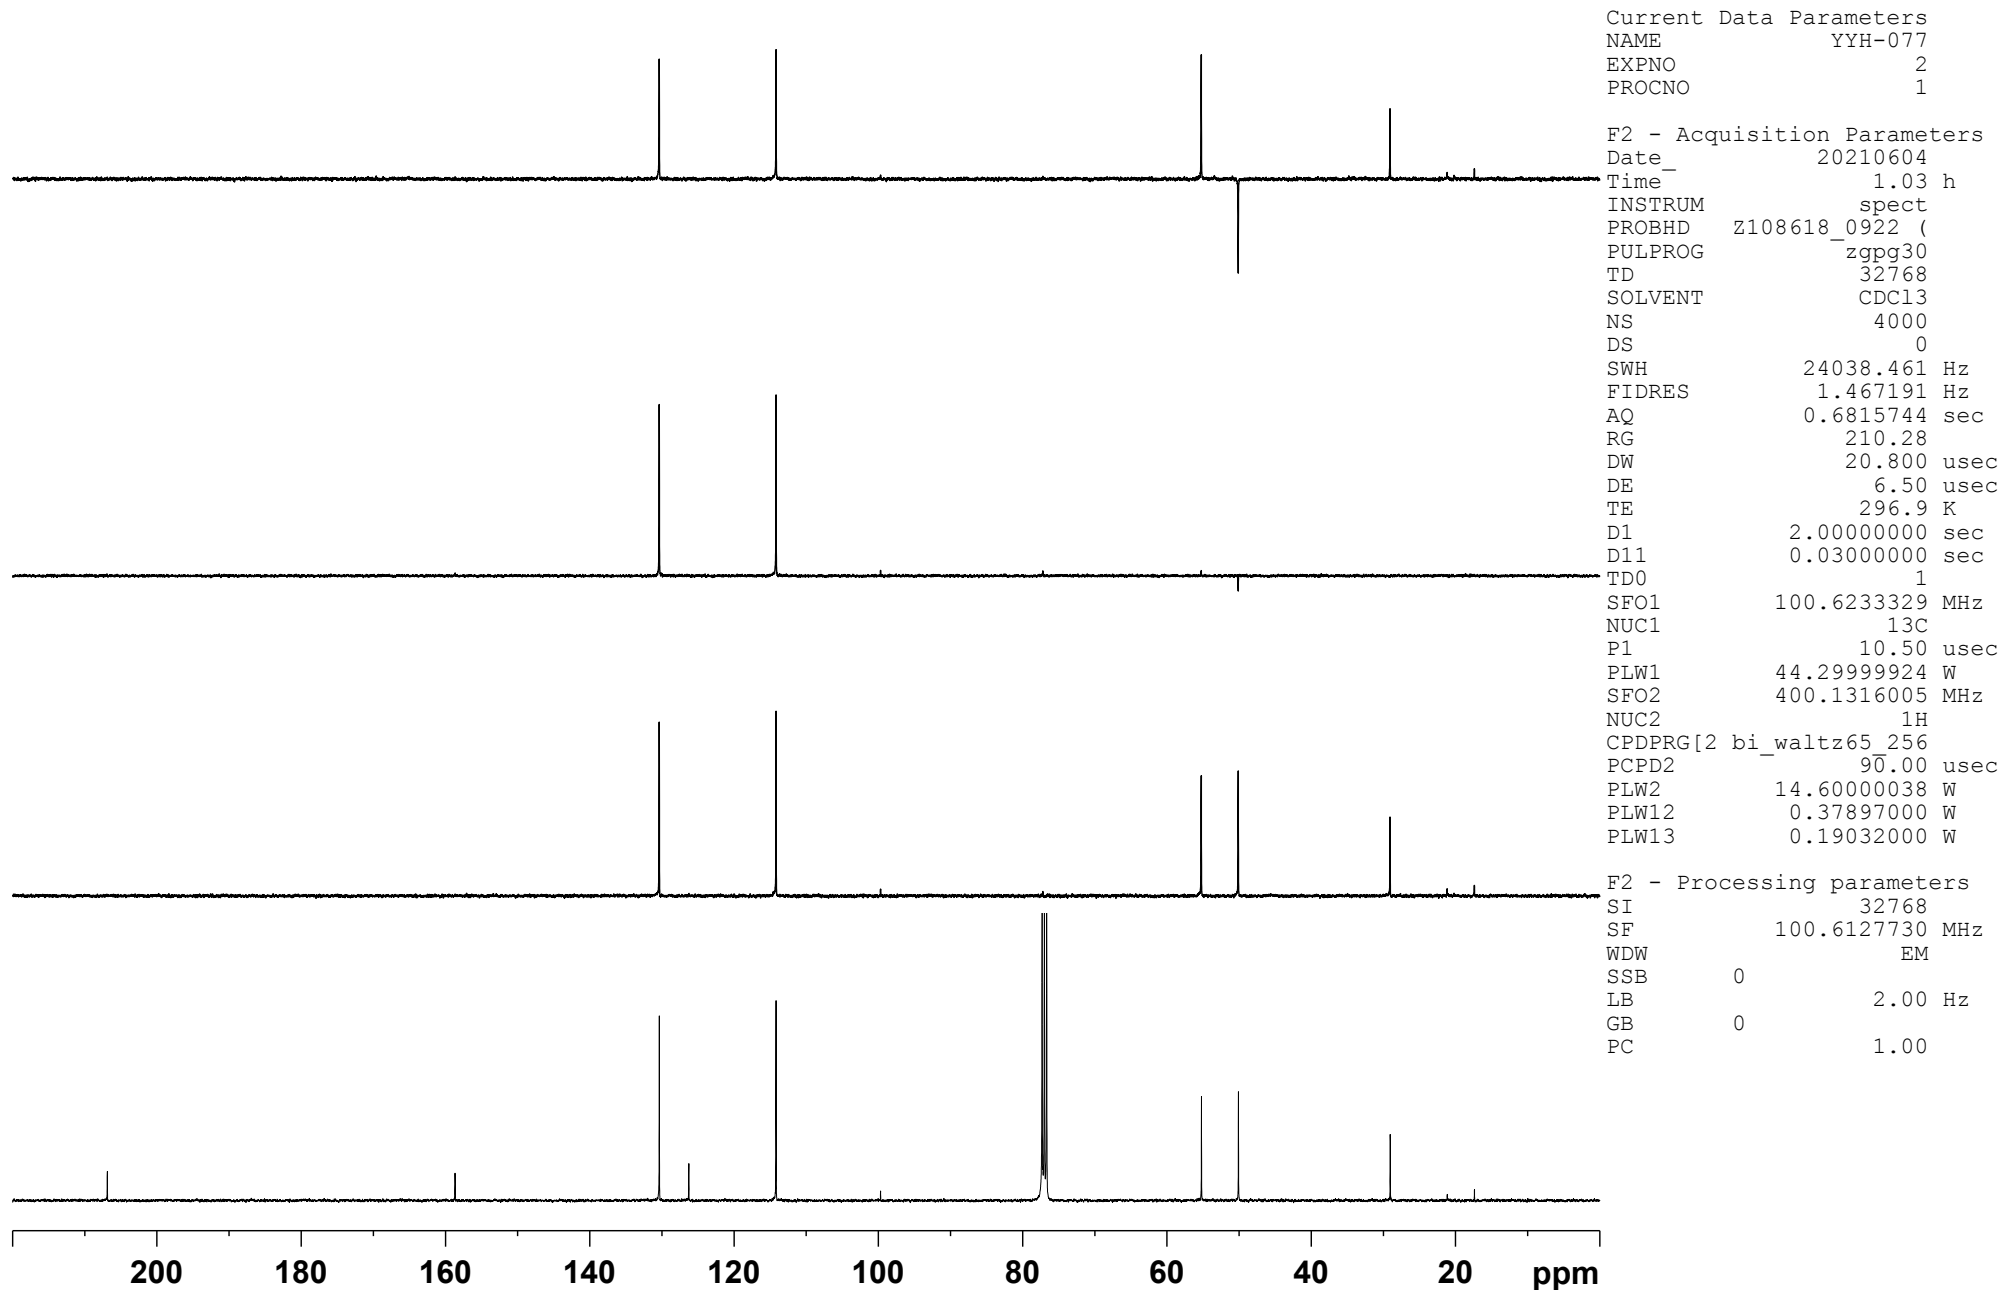

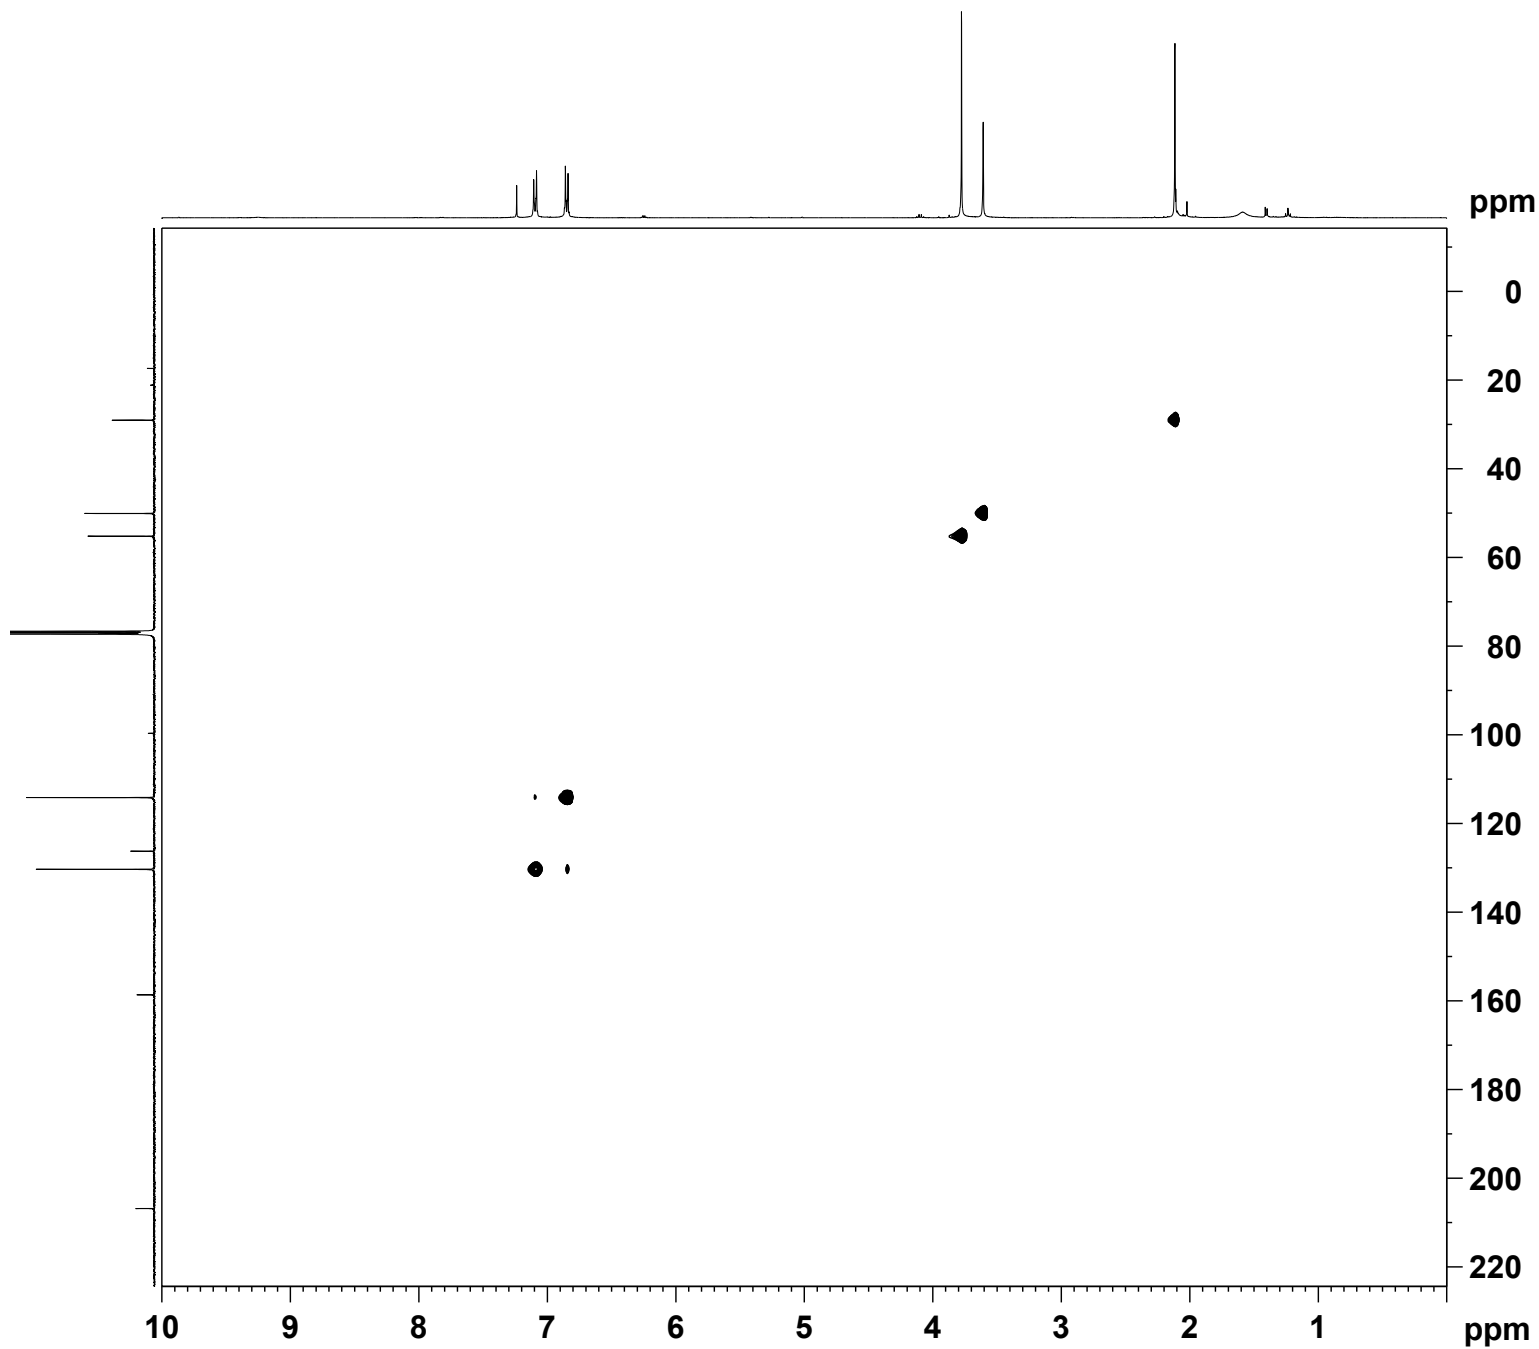

```

Current Data Parameters
NAME          YYH-077
EXPNO         6
PROCNO        1

F2 - Acquisition Parameters
Date_         20210604
Time          5.38 h
INSTRUM       spect
PROBHD        Z108618_0922 (
PULPROG       hsqcetgpsisp2.2
TD            2048
SOLVENT       CDCl3
NS            6
DS            16
SWH           8012.820 Hz
FIDRES        7.825020 Hz
AQ            0.1277952 sec
RG            210.28
DW            62.400 usec
DE            6.50 usec
TE            297.3 K
CNST2         145.0000000
CNST17        -0.5000000
D0            0.00000300 sec
D1            1.50000000 sec
D4            0.00172414 sec
D11           0.03000000 sec
D16           0.00020000 sec
D24           0.00086207 sec
IN0           0.00002080 sec
TDav          1
SFO1          400.1324008 MHz
NUC1          1H
P1            14.50 usec
P2            29.00 usec
P28           1000.00 usec
PLW1          13.10000038 W
SFO2          100.6233329 MHz
NUC2          13C
CPDPRG[2]     garp
P3            10.50 usec
P14           500.00 usec
P24           2000.00 usec
PCPD2         80.00 usec
PLW0          0 W
PLW2          44.00000000 W
PLW12         0.75796998 W
SPNAM[3]      Crp60,0.5,20.1
SFOAL3        0.500
SPOFFS3       0 Hz
SPW3          7.41179991 W
SPNAM[7]      Crp60comp,4
SFOAL7        0.500
SPOFFS7       0 Hz
SPW7          7.41179991 W
GPNAM[1]      SMSQ10.100
GPZ1          80.00 %
GPNAM[2]      SMSQ10.100
GPZ2          20.10 %
GPNAM[3]      SMSQ10.100
GPZ3          11.00 %
GPNAM[4]      SMSQ10.100
GPZ4          -5.00 %
P16           1000.00 usec
P19           600.00 usec

F1 - Acquisition parameters
TD            256
SFO1          100.6233 MHz
FIDRES        187.800476 Hz
SW            238.896 ppm
FnMODE        Echo-Antiecho

F2 - Processing parameters
SI            1024
SF            400.1300188 MHz
WDW           QSINE
SSB           2
LB            0 Hz
GB            0
PC            1.40

F1 - Processing parameters
SI            1024
MC2           echo-antiecho
SF            100.6127730 MHz
WDW           QSINE
SSB           2
LB            0 Hz
GB            0
    
```

## COSY of compound 4c

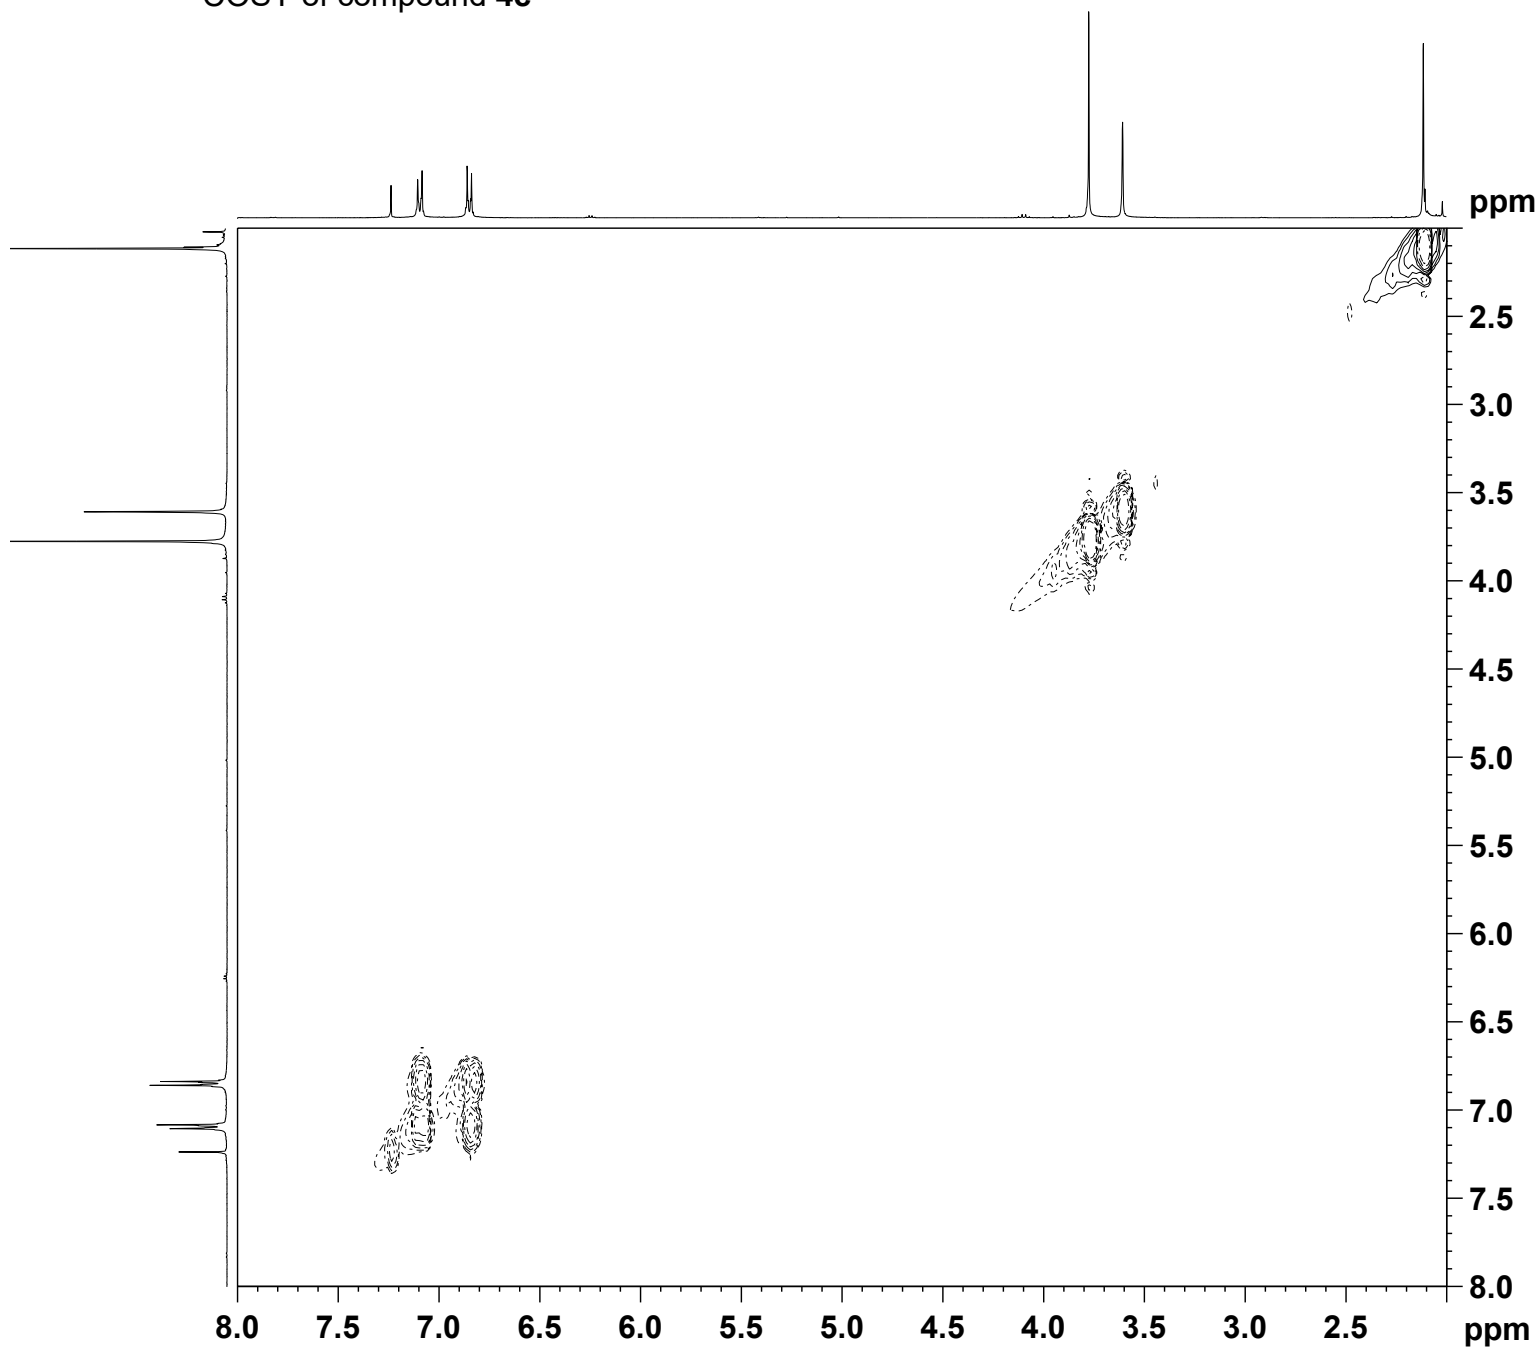

Current Data Parameters  
 NAME YYH-077  
 EXPNO 7  
 PROCNO 1

## F2 - Acquisition Parameters

Date\_ 20210604  
 Time\_ 6.22 h  
 INSTRUM spect  
 PROBHD Z108618\_0922 (  
 PULPROG cosygpppqf  
 TD 2048  
 SOLVENT CDCl3  
 NS 6  
 DS 16  
 SWH 8012.820 Hz  
 FIDRES 7.825020 Hz  
 AQ 0.1277952 sec  
 RG 210.28  
 DW 62.400 usec  
 DE 6.50 usec  
 TE 297.3 K  
 D0 0.00000300 sec  
 D1 2.00000000 sec  
 D11 0.03000000 sec  
 D12 0.00002000 sec  
 D13 0.00000400 sec  
 D16 0.00020000 sec  
 IN0 0.00012480 sec  
 T Dav 1  
 SFO1 400.1324008 MHz  
 NUC1 1H  
 P0 14.50 usec  
 P1 14.50 usec  
 P17 2500.00 usec  
 PLW1 13.10000038 W  
 PLW10 3.06030011 W  
 GPNAM[1] SMSQ10.100  
 GPZ1 10.00 %  
 P16 1000.00 usec

## F1 - Acquisition parameters

TD 256  
 SFO1 400.1324 MHz  
 FIDRES 62.600159 Hz  
 SW 20.025 ppm  
 F nMODE QF

## F2 - Processing parameters

SI 1024  
 SF 400.1300188 MHz  
 WDW QSINE  
 SSB 0  
 LB 0 Hz  
 GB 0  
 PC 1.40

## F1 - Processing parameters

SI 1024  
 MC2 QF  
 SF 400.1300188 MHz  
 WDW QSINE  
 SSB 0  
 LB 0 Hz  
 GB 0

## NOESY of compound 4c

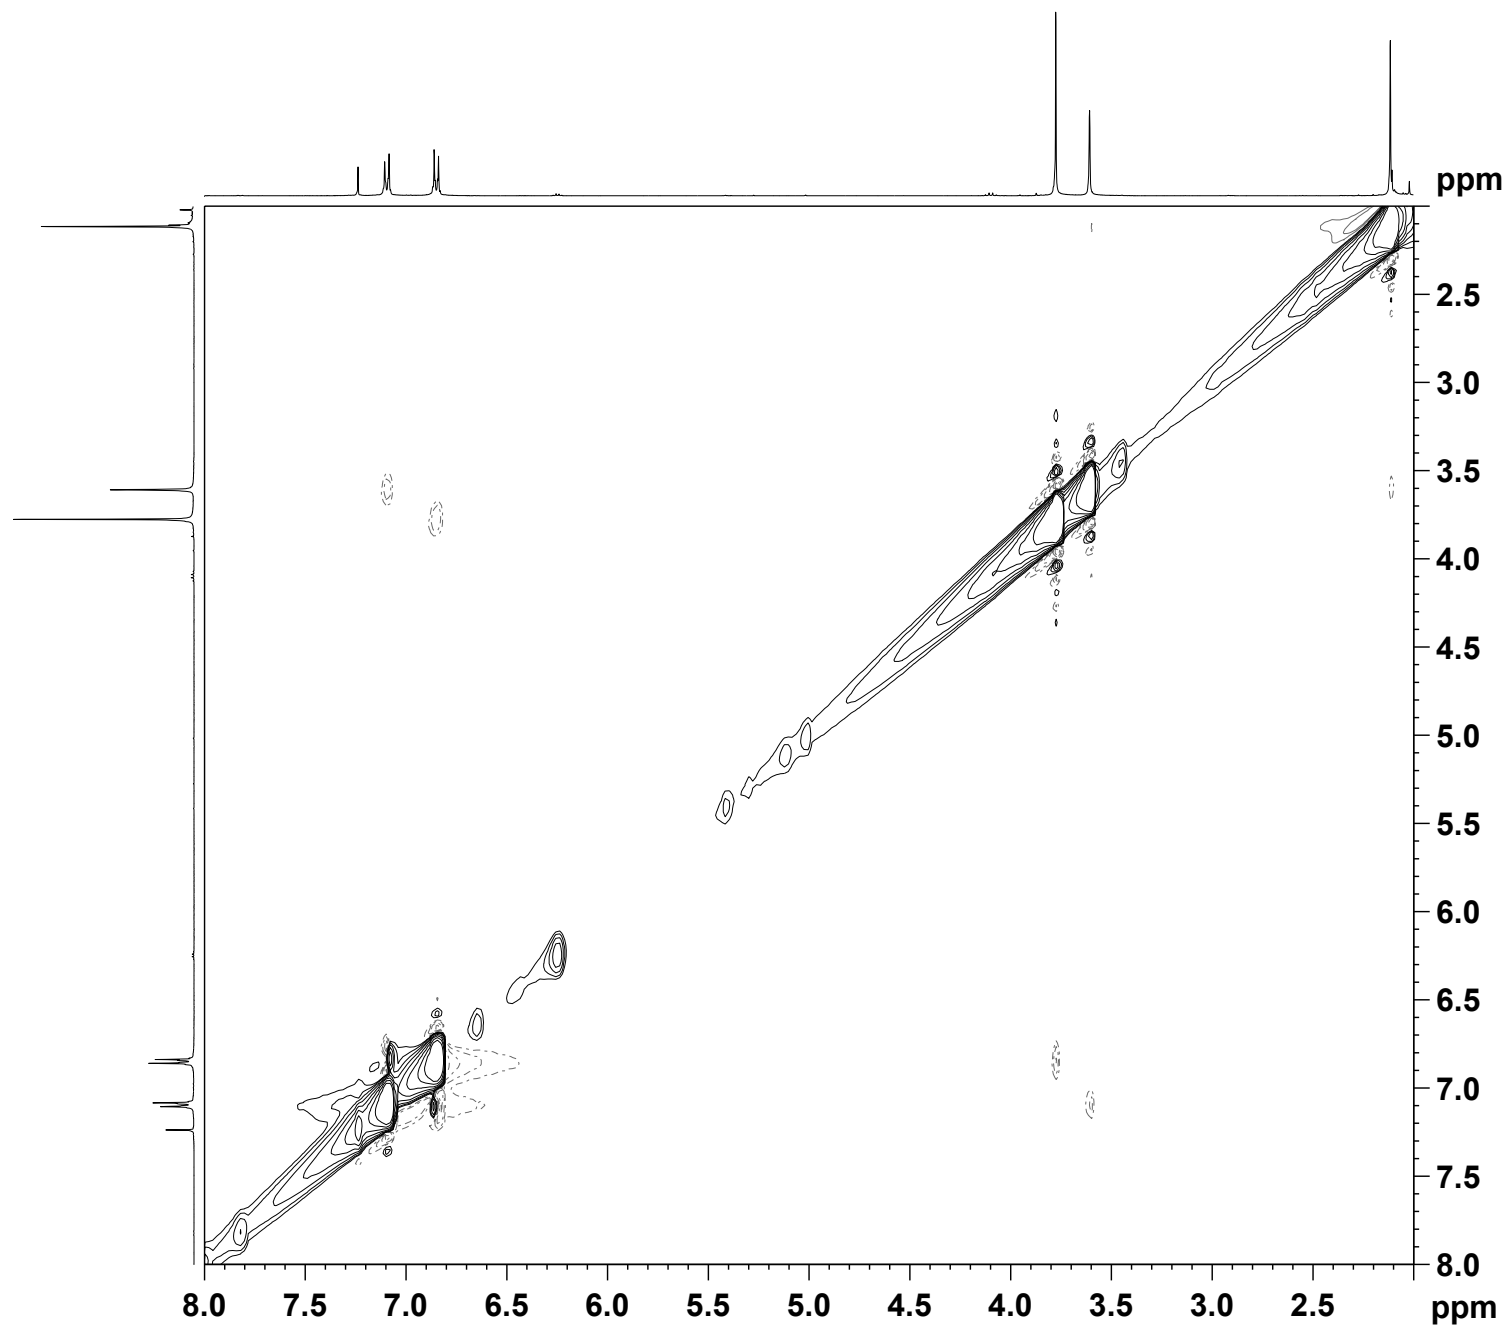

Current Data Parameters  
 NAME YYH-077  
 EXPNO 8  
 PROCNO 1

F2 - Acquisition Parameters  
 Date 20210604  
 Time 7.18 h  
 INSTRUM spect  
 PROBHD Z108618\_0922 (  
 PULPROG noesygpphpp  
 TD 2048  
 SOLVENT CDCl3  
 NS 6  
 DS 16  
 SWH 8012.820 Hz  
 FIDRES 7.825020 Hz  
 AQ 0.1277952 sec  
 RG 210.28  
 DW 62.400 usec  
 DE 6.50 usec  
 TE 296.7 K  
 D0 0.00004394 sec  
 D1 2.00000000 sec  
 D8 0.40000001 sec  
 D11 0.03000000 sec  
 D12 0.00002000 sec  
 D16 0.00020000 sec  
 IN0 0.00012480 sec  
 T Dav 1  
 SFO1 400.1324008 MHz  
 NUC1 1H  
 P1 14.50 usec  
 P2 29.00 usec  
 P17 2500.00 usec  
 PLW1 13.10000038 W  
 PLW10 3.06030011 W  
 GPNAM[1] SMSQ10.100  
 GPZ1 40.00 %  
 P16 1000.00 usec

F1 - Acquisition parameters  
 TD 256  
 SFO1 400.1324 MHz  
 FIDRES 62.600159 Hz  
 SW 20.025 ppm  
 FnMODE States-TPPI

F2 - Processing parameters  
 SI 1024  
 SF 400.1300188 MHz  
 WDW QSINE  
 SSB 2  
 LB 0 Hz  
 GB 0  
 PC 1.40

F1 - Processing parameters  
 SI 1024  
 MC2 States-TPPI  
 SF 400.1300188 MHz  
 WDW QSINE  
 SSB 2  
 LB 0 Hz  
 GB 0

Sample Name **YYH-076**  
Date collected **2021-06-09**

Pulse sequence **PROTON**  
Solvent **cdcl3**

Temperature **25**  
Spectrometer **Agilent-NMR-inova500**

Study owner **vnmr2**  
Operator **vnmr2**

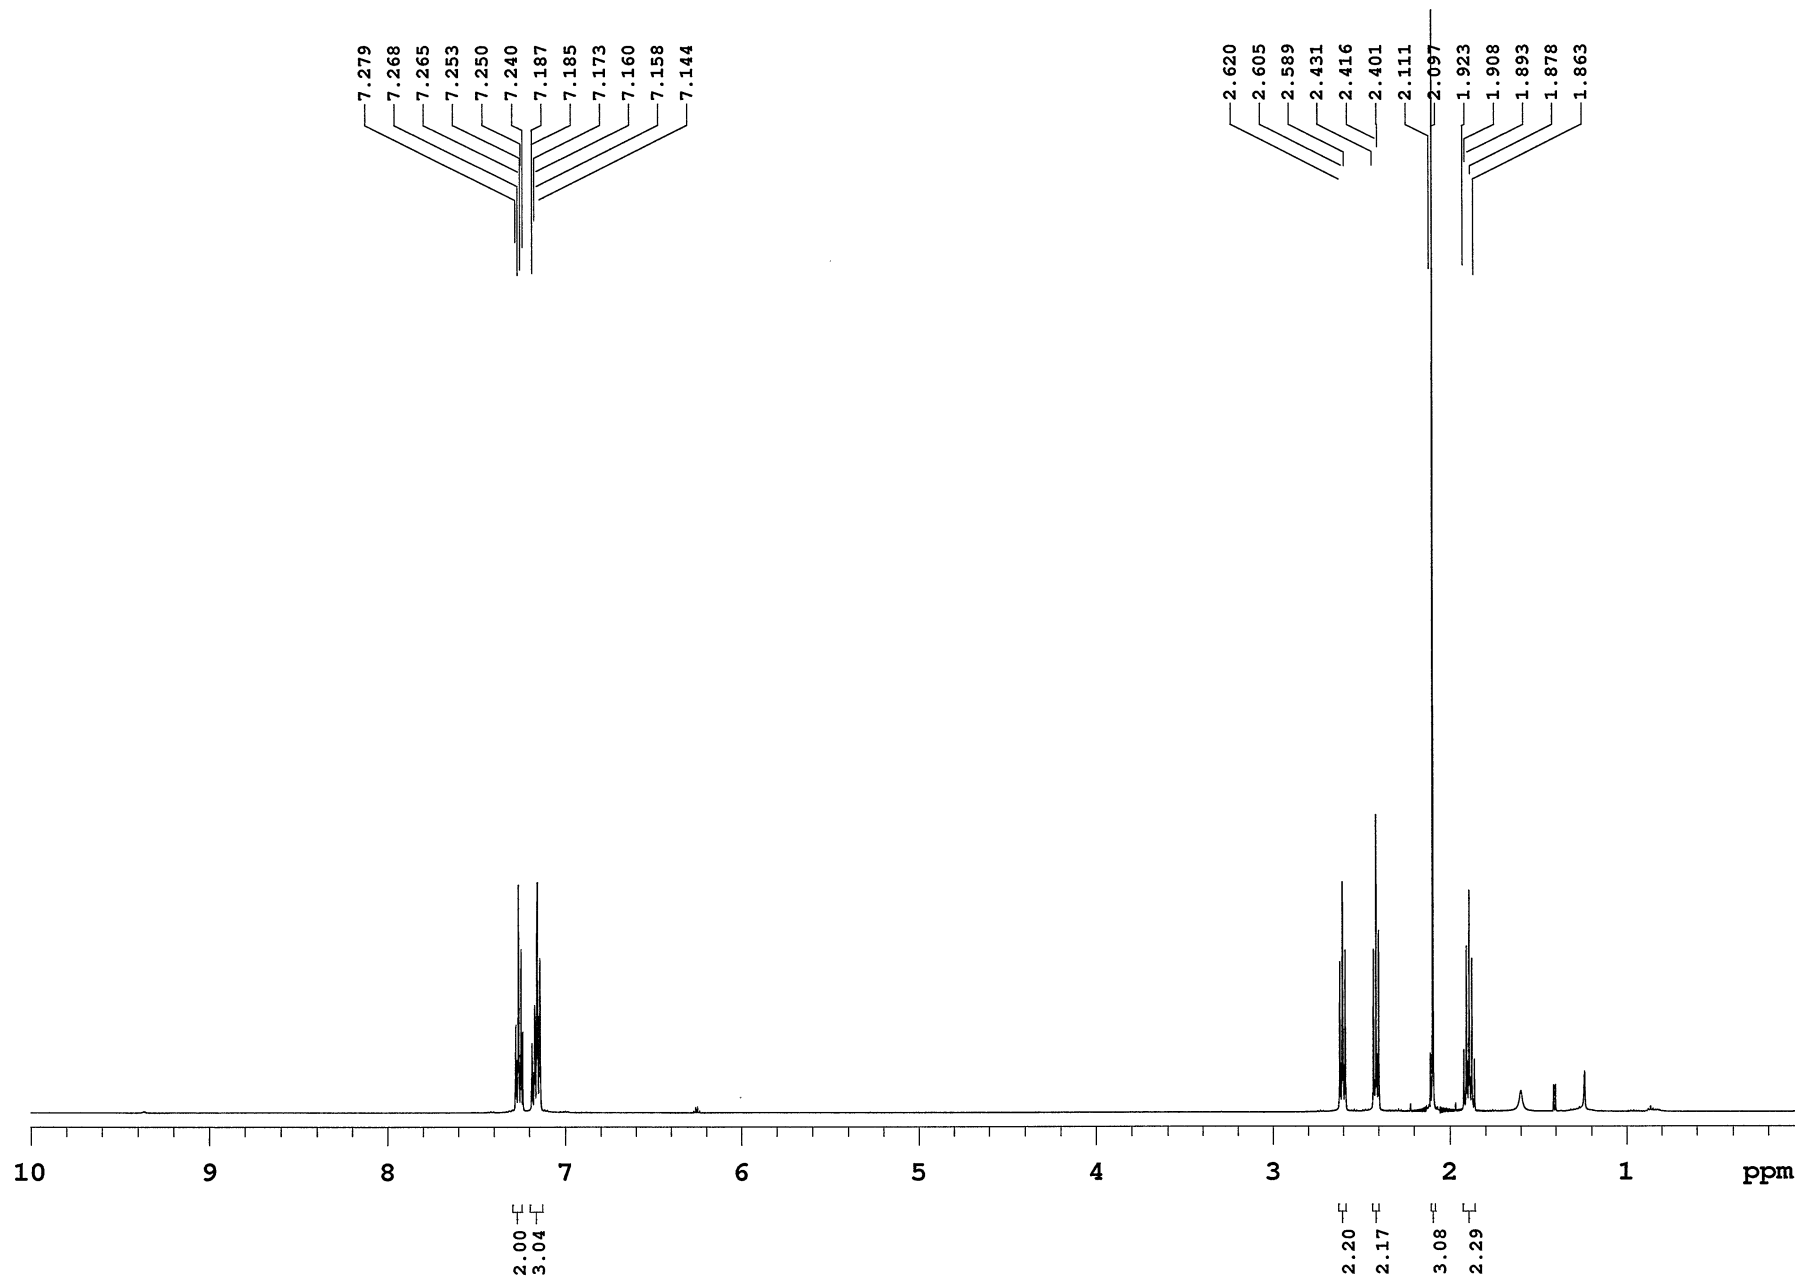

1H NMR (CDCl<sub>3</sub>, 500 MHz) of compound **4d**



Sample Name **YYH-076**  
Date collected **2021-06-09**

Pulse sequence **CARBON**  
Solvent **cdcl3**

Temperature **25**  
Spectrometer **Agilent-NMR-inova500**

Study owner **vnmr2**  
Operator **vnmr2**

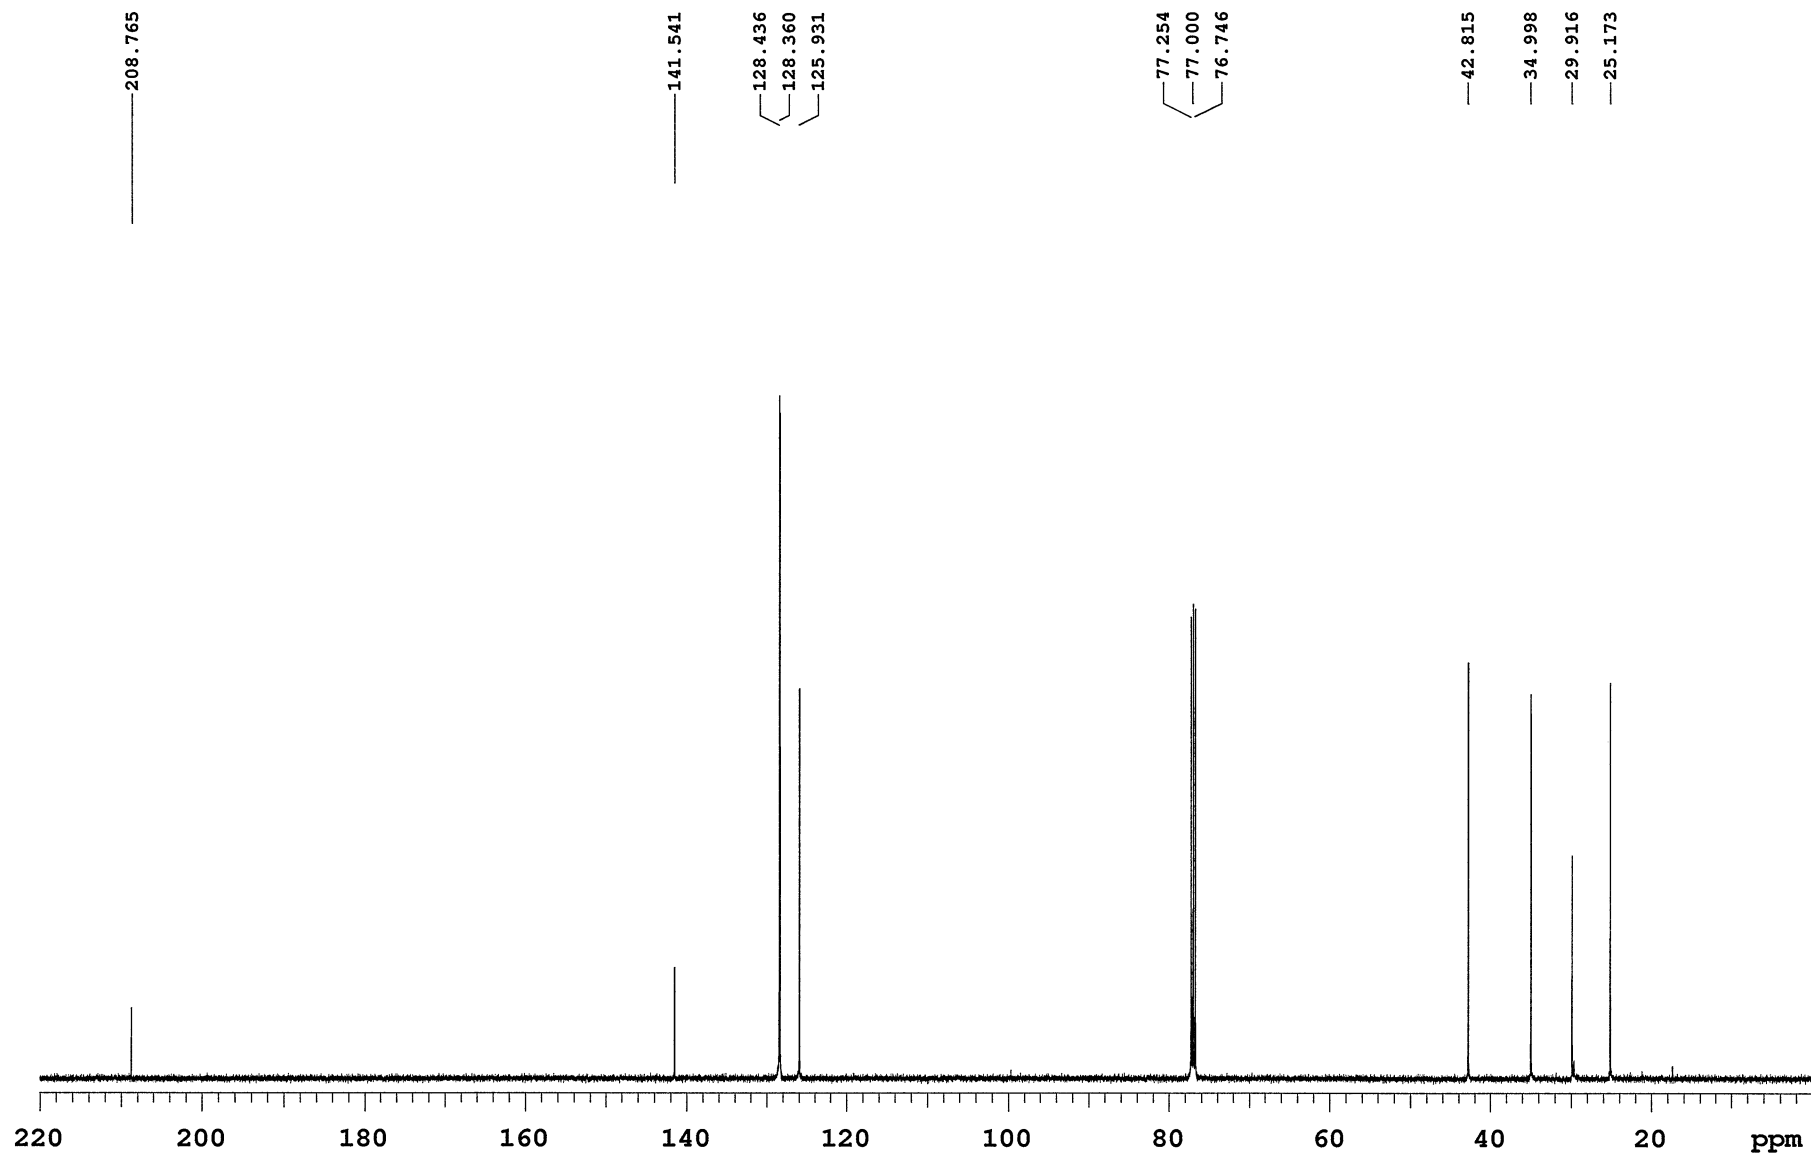

13C NMR (CDCl<sub>3</sub>, 125 MHz) of compound **4d**

Sample Name **YYH-076**  
Date collected **2021-06-09**

Pulse sequence **DEPT**  
Solvent **cdcl3**

Temperature **25**  
Spectrometer **Agilent-NMR-inova500**

Study owner **vnmr2**  
Operator **vnmr2**

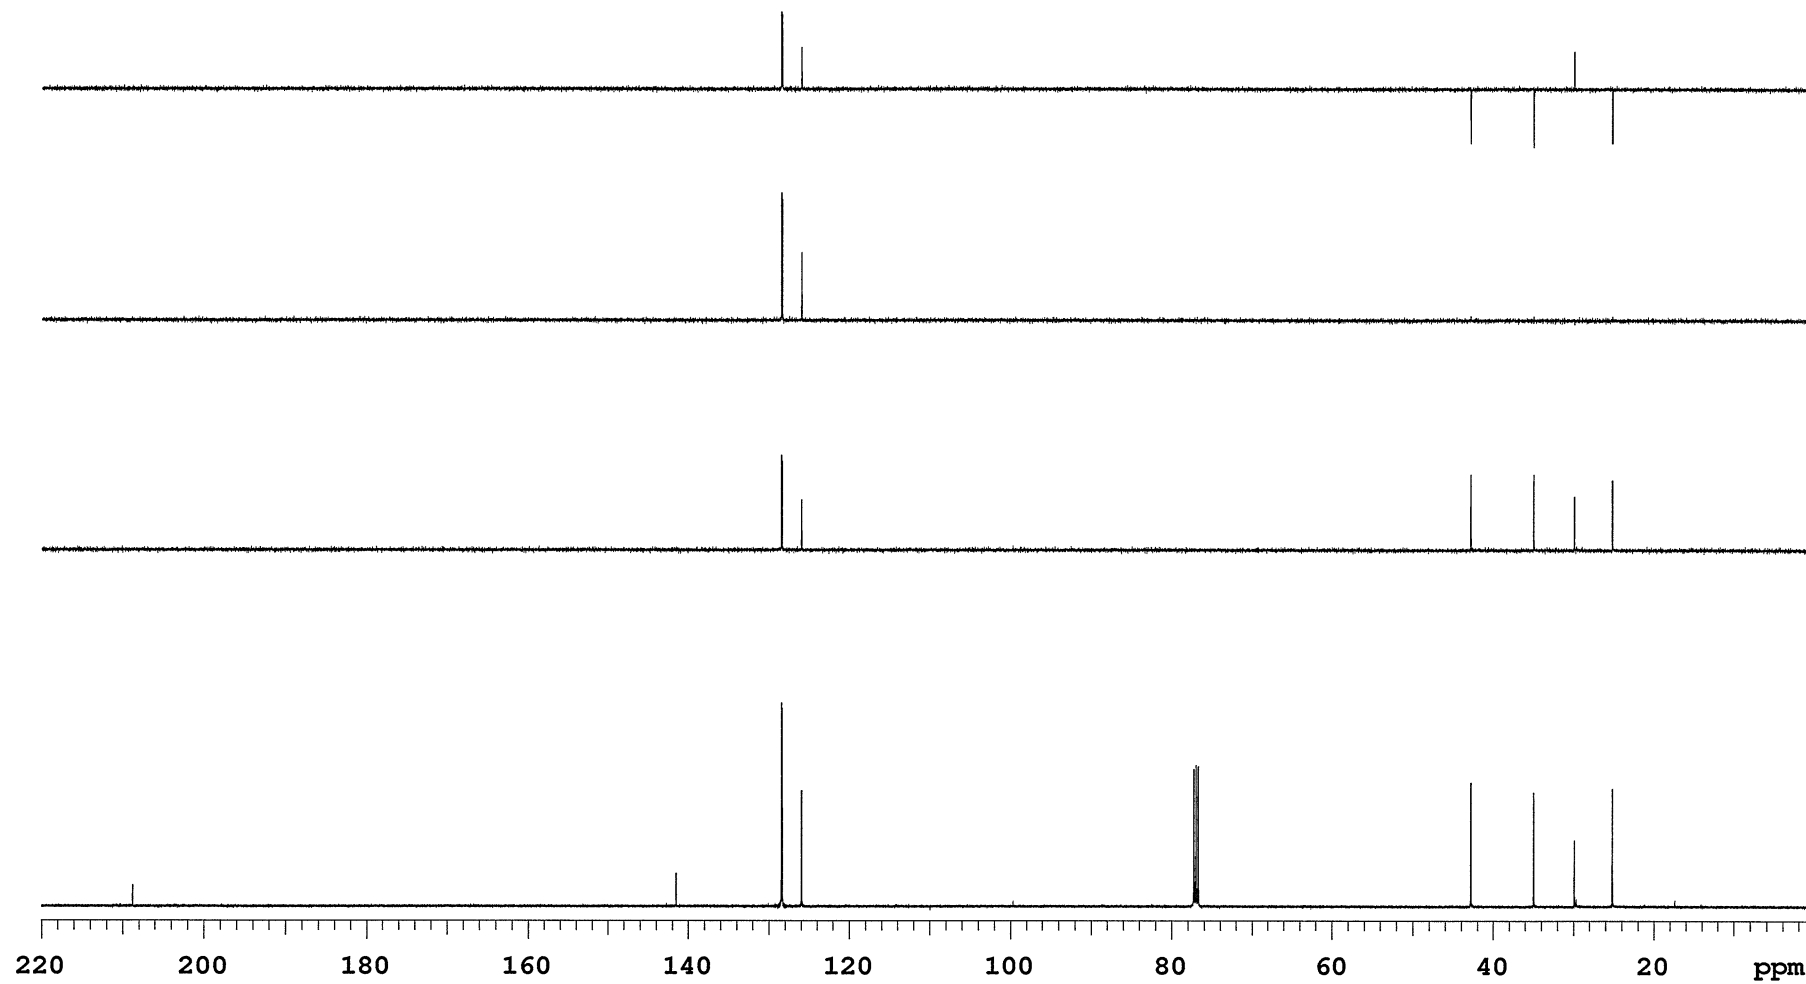DEPT of compound **4d**

Sample Name **YYH-076**  
Date collected **2021-06-10**

Pulse sequence **gHSQC**  
Solvent **cdcl3**

Temperature **25**  
Spectrometer **Agilent-NMR-inova500**

Study owner **vnmr2**  
Operator **vnmr2**

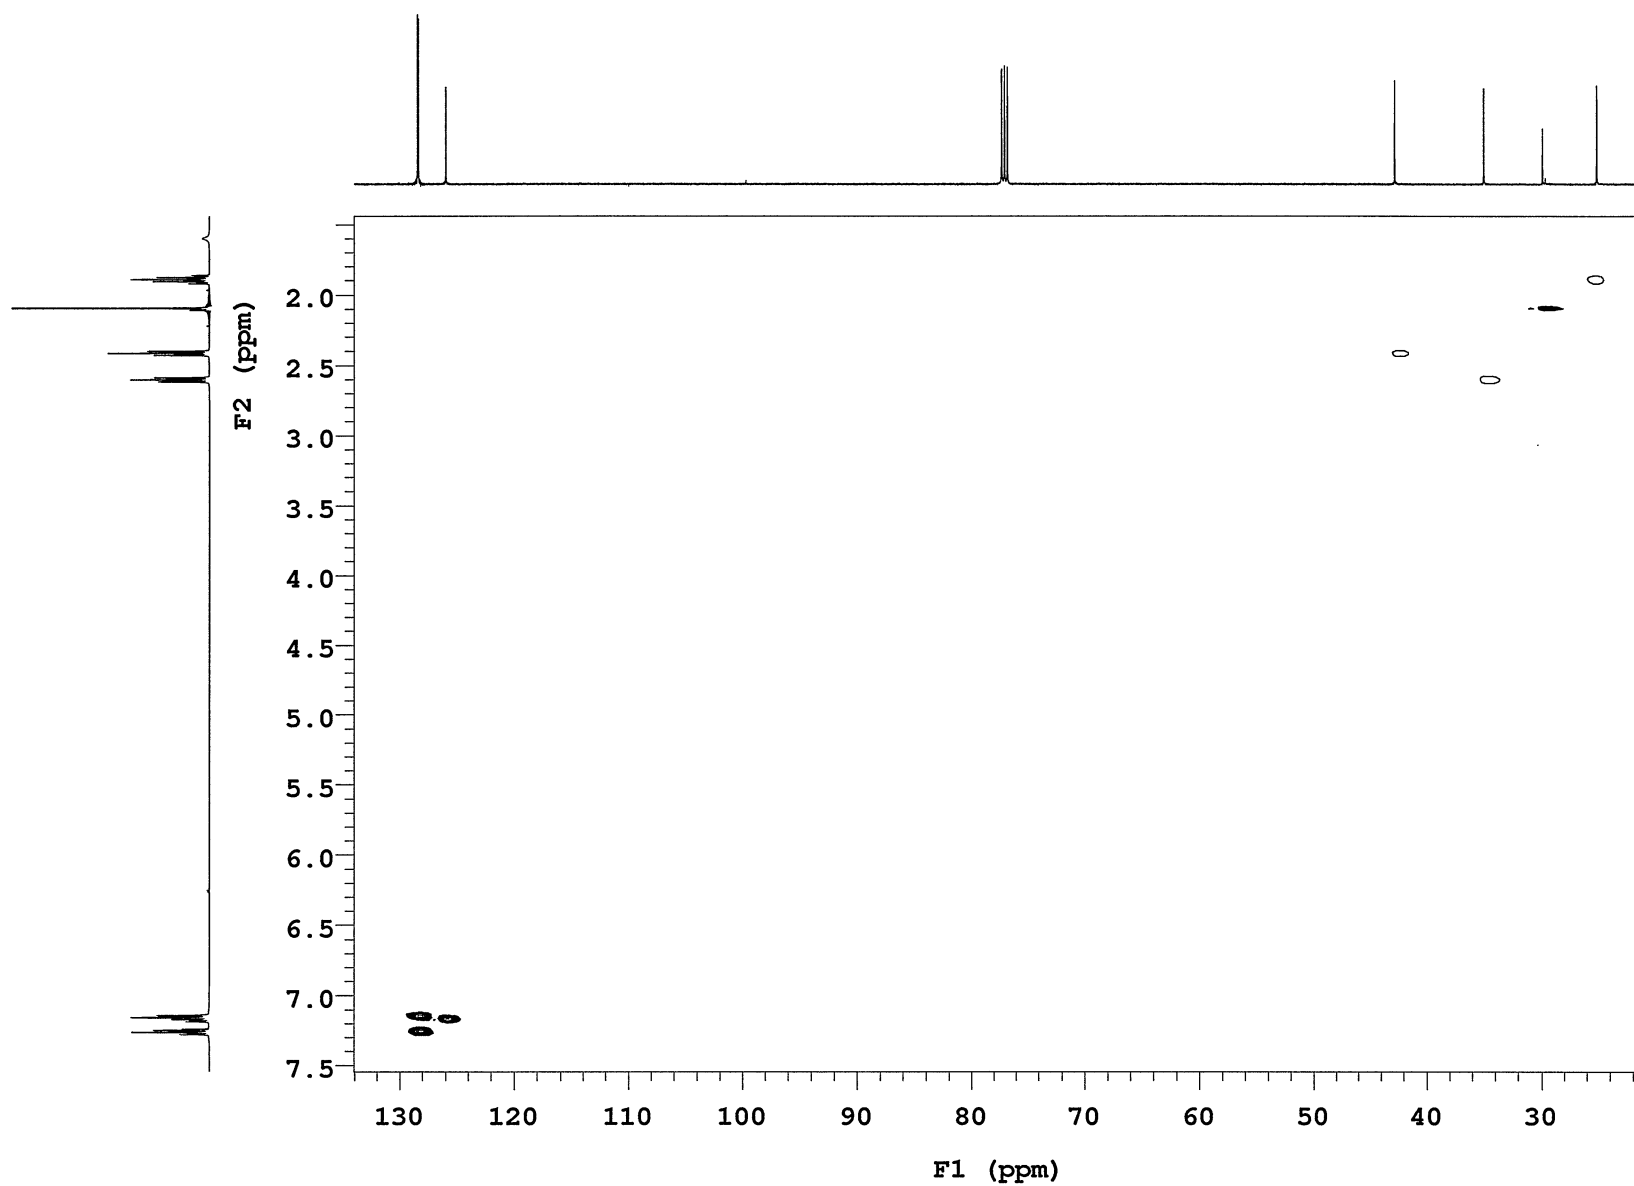

Sample Name **YYH-076**  
Date collected **2021-06-10**

Pulse sequence **gCOSY**  
Solvent **cdcl3**

Temperature **25**  
Spectrometer **Agilent-NMR-inova500**

Study owner **vnmr2**  
Operator **vnmr2**

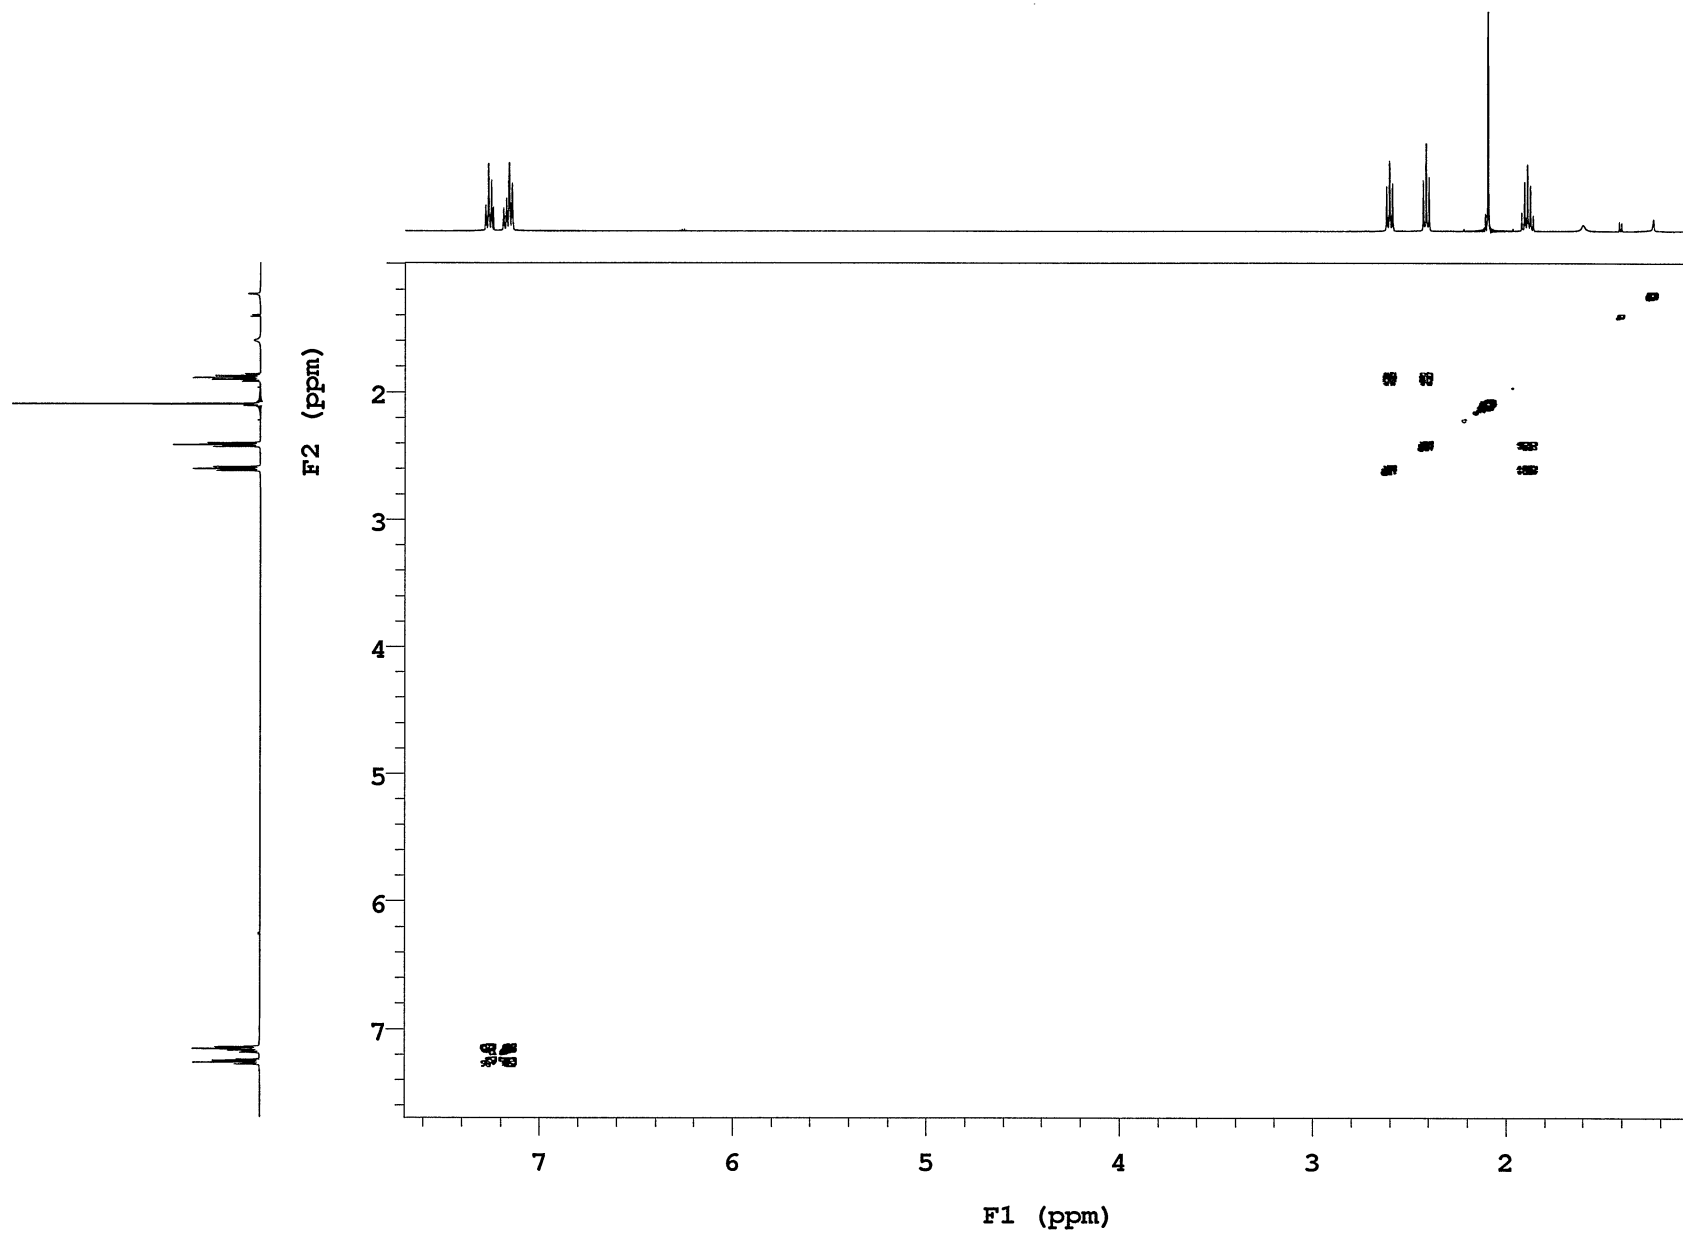

COSY of compound 4d

Sample Name **YYH-076**  
Date collected **2021-06-10**

Pulse sequence **NOESY**  
Solvent **cdcl3**

Temperature **25**  
Spectrometer **Agilent-NMR-inova500**

Study owner **vnmr2**  
Operator **vnmr2**

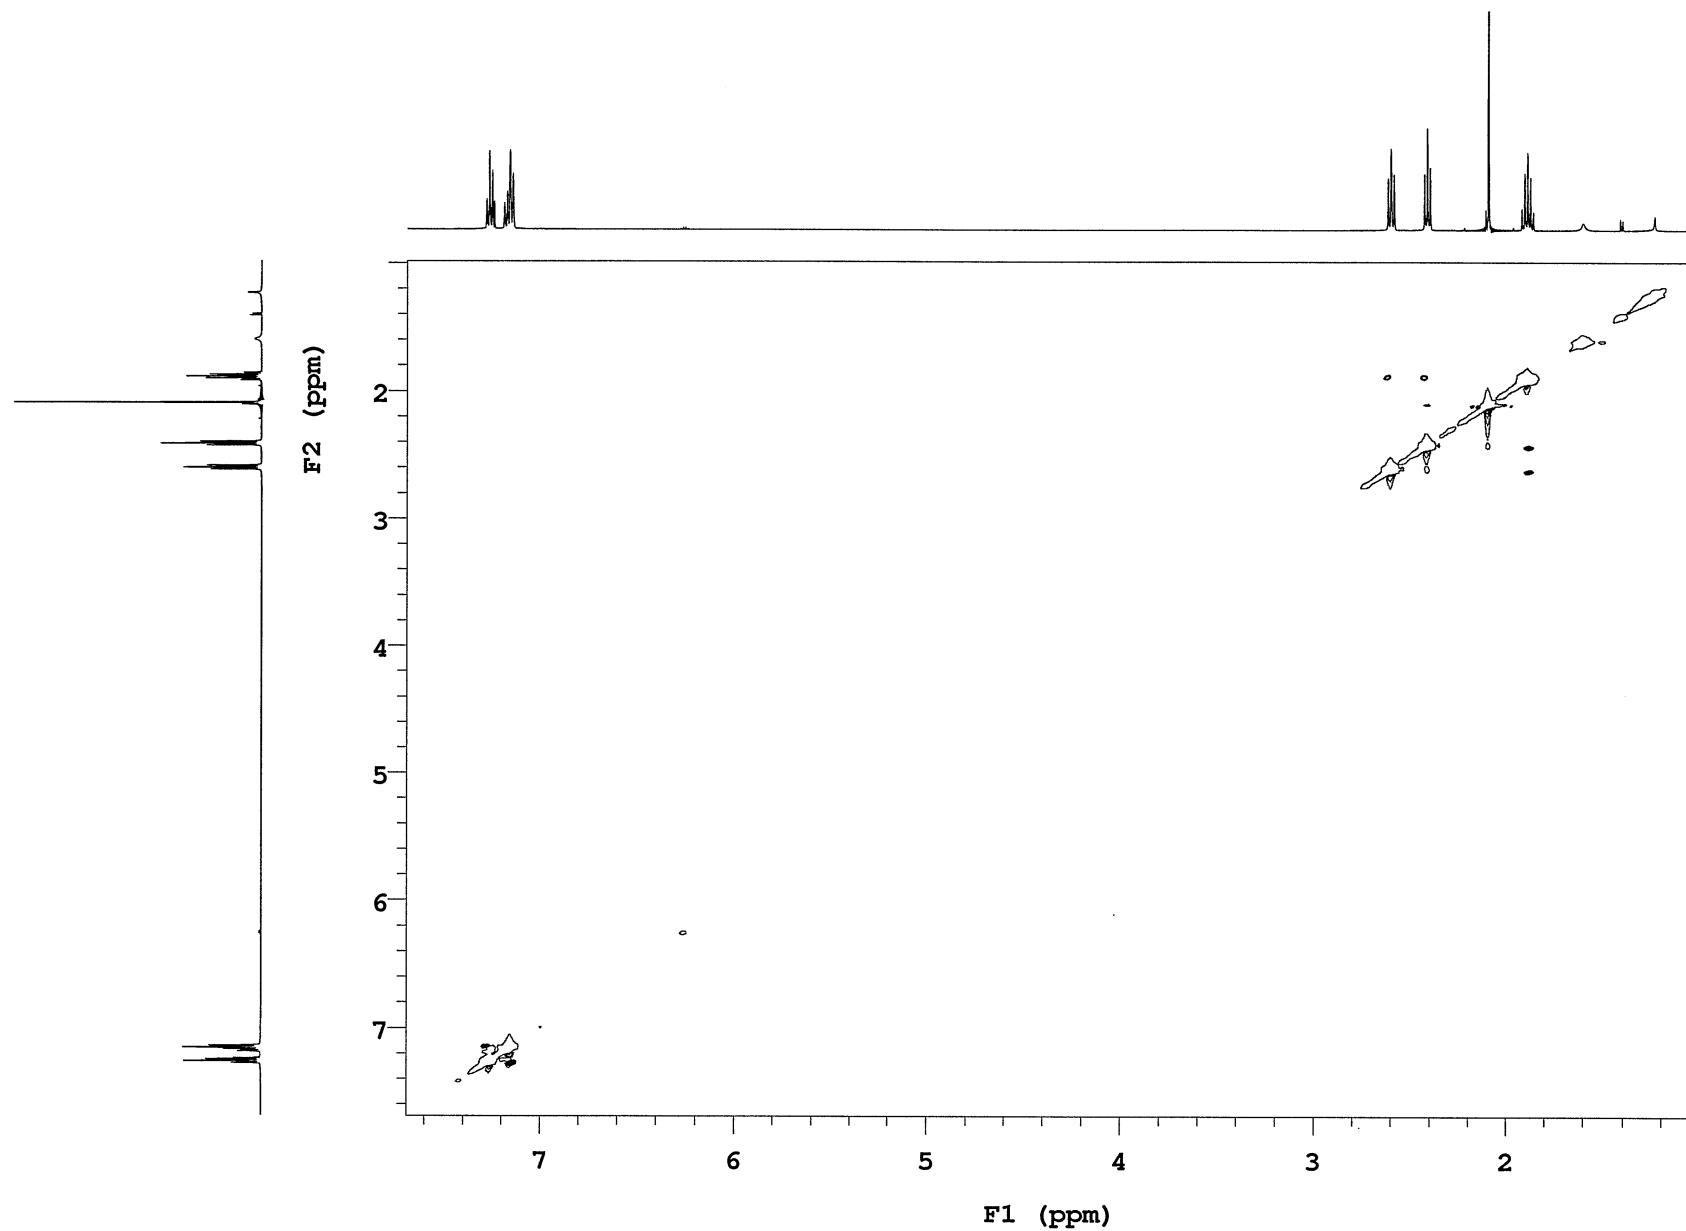NOESY of compound **4d**

1H NMR (CDCl3, 400 MHz) of compound 4e

S90

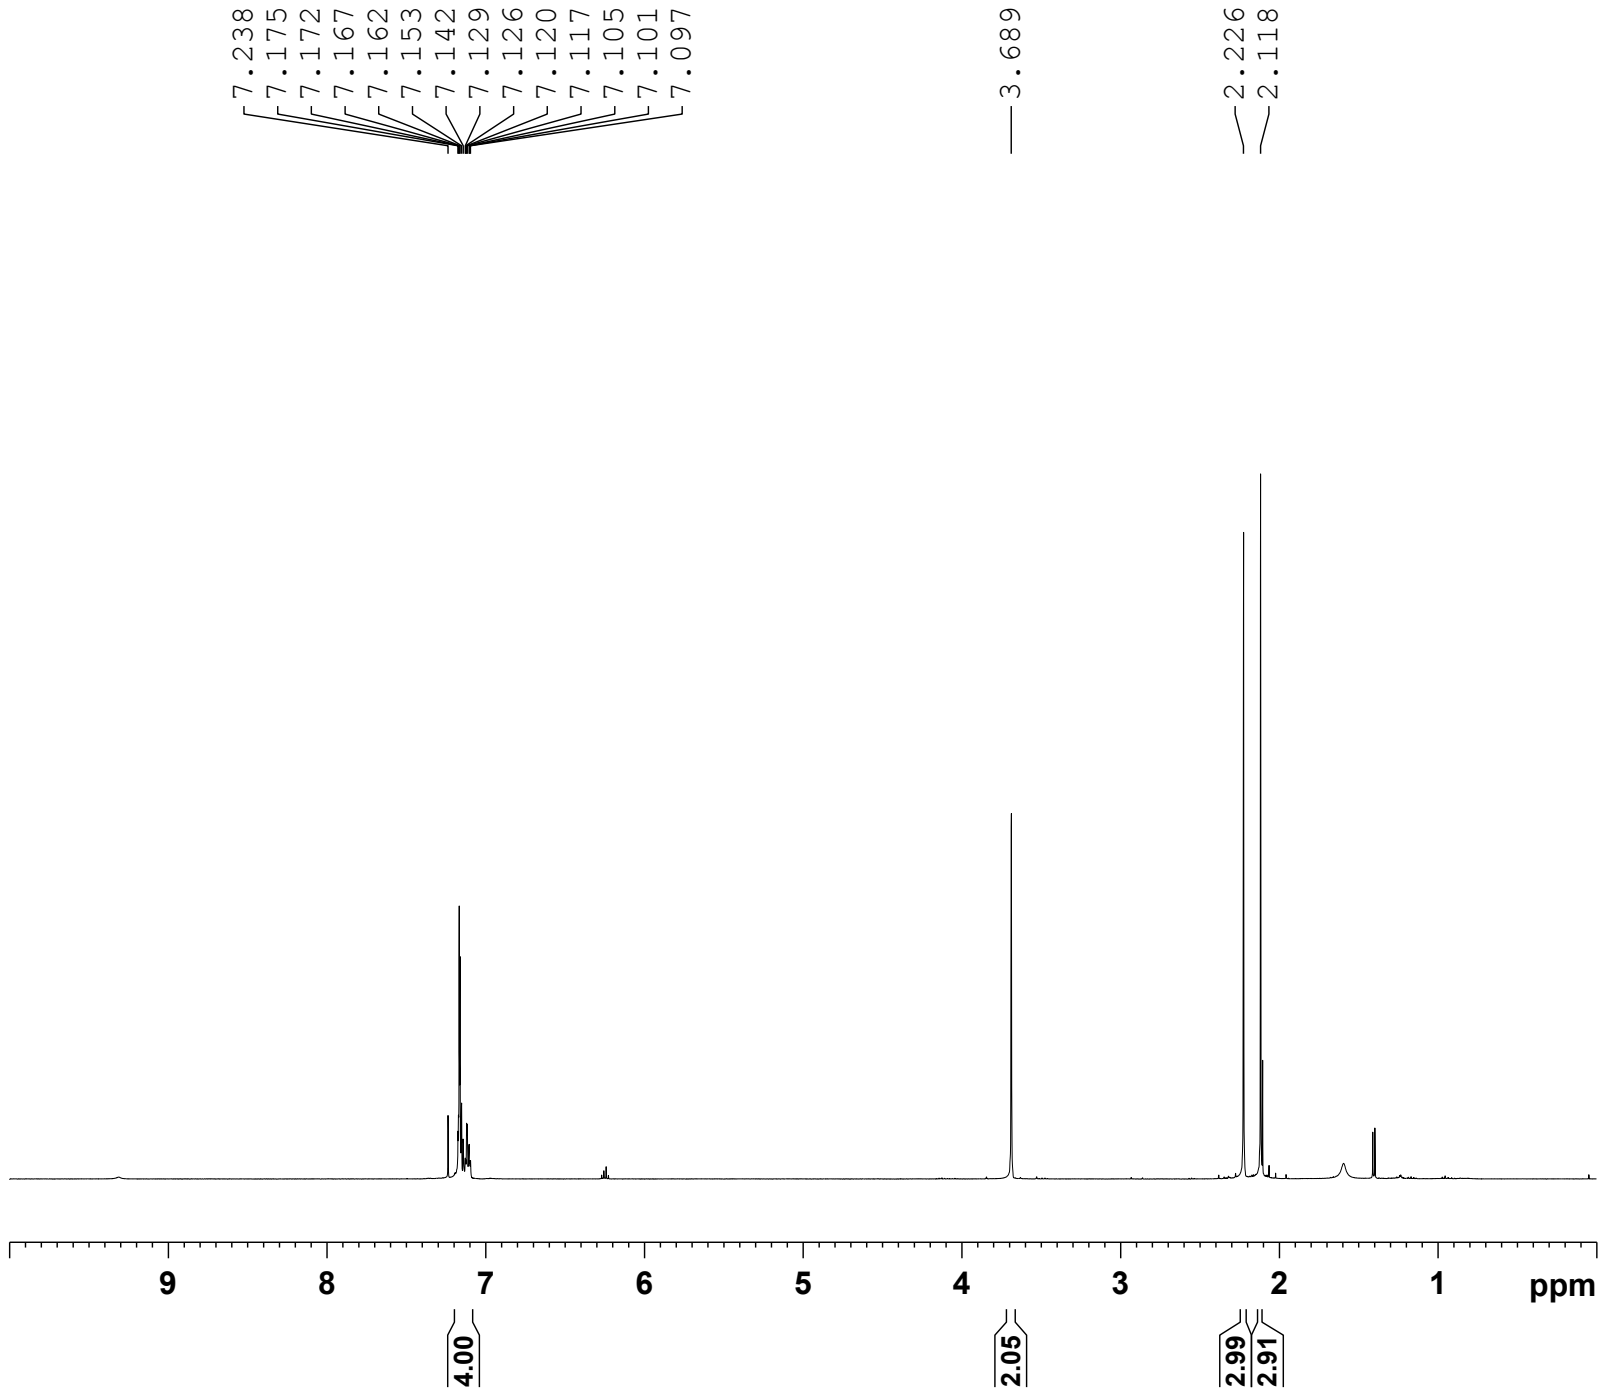

Current Data Parameters  
 NAME YYH-084  
 EXPNO 1  
 PROCNO 1

F2 - Acquisition Parameters  
 Date\_ 20210607  
 Time\_ 23.08 h  
 INSTRUM spect  
 PROBHD Z108618\_0922 (  
 PULPROG zg30  
 TD 32768  
 SOLVENT CDC13  
 NS 16  
 DS 0  
 SWH 8012.820 Hz  
 FIDRES 0.489064 Hz  
 AQ 2.0447233 sec  
 RG 177.78  
 DW 62.400 usec  
 DE 16.43 usec  
 TE 297.7 K  
 D1 2.00000000 sec  
 TD0 1  
 SFO1 400.1324008 MHz  
 NUC1 1H  
 P1 14.50 usec  
 PLW1 13.10000038 W

F2 - Processing parameters  
 SI 16384  
 SF 400.1300189 MHz  
 WDW EM  
 SSB 0  
 LB 0 Hz  
 GB 0  
 PC 1.00

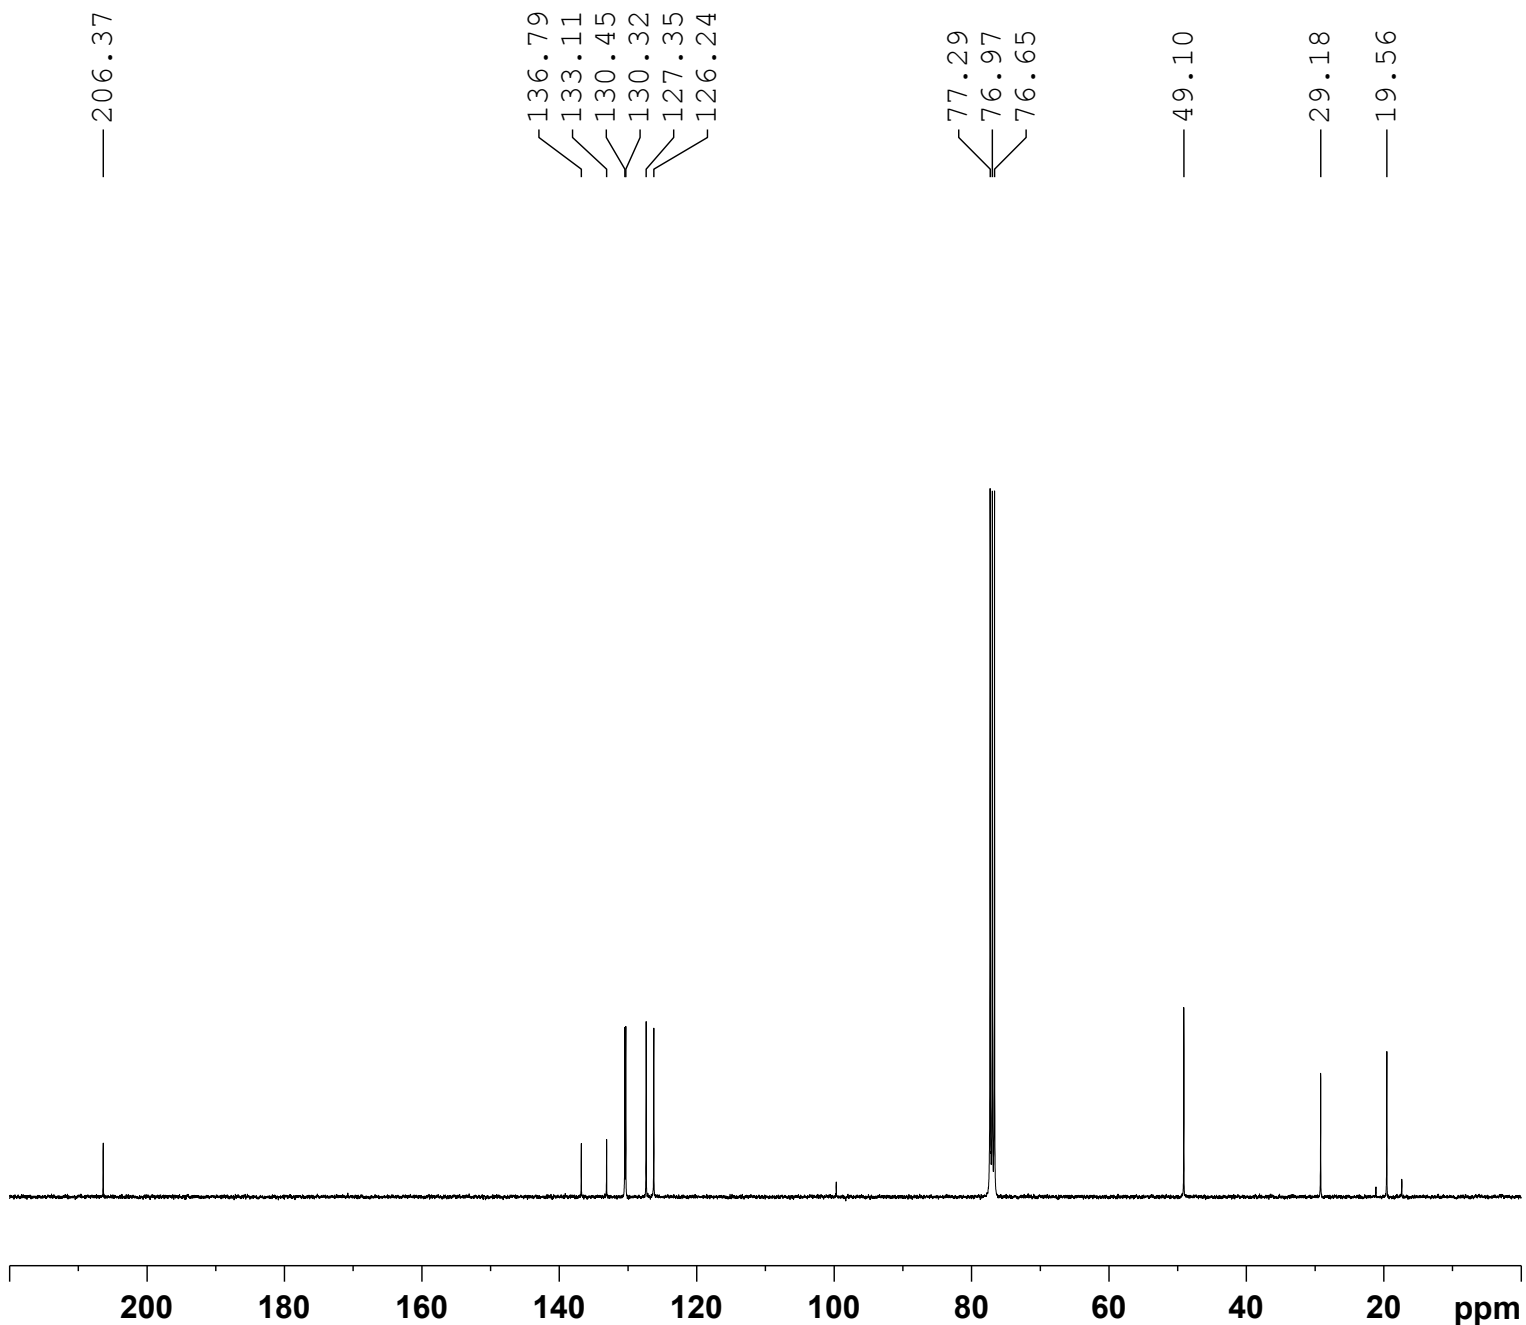

$^{13}\text{C}$  NMR ( $\text{CDCl}_3$ , 100 MHz) of compound **4e**

Current Data Parameters  
 NAME YYH-084  
 EXPNO 2  
 PROCNO 1

F2 - Acquisition Parameters  
 Date\_ 20210608  
 Time\_ 9.34 h  
 INSTRUM spect  
 PROBHD z108618\_0922 (  
 PULPROG zgpg30  
 TD 32768  
 SOLVENT  $\text{CDCl}_3$   
 NS 4000  
 DS 0  
 SWH 24038.461 Hz  
 FIDRES 1.467191 Hz  
 AQ 0.6815744 sec  
 RG 210.28  
 DW 20.800 usec  
 DE 6.50 usec  
 TE 299.2 K  
 D1 2.00000000 sec  
 D11 0.03000000 sec  
 TD0 1  
 SFO1 100.6233329 MHz  
 NUC1  $^{13}\text{C}$   
 P1 10.50 usec  
 PLW1 44.29999924 W  
 SFO2 400.1316005 MHz  
 NUC2  $^1\text{H}$   
 CPDPRG[2] bi\_waltz65 256  
 PCPD2 90.00 usec  
 PLW2 14.60000038 W  
 PLW12 0.37897000 W  
 PLW13 0.19032000 W

F2 - Processing parameters  
 SI 32768  
 SF 100.6127747 MHz  
 WDW EM  
 SSB 0  
 LB 2.00 Hz  
 GB 0  
 PC 1.00

## DEPT of compound 4e

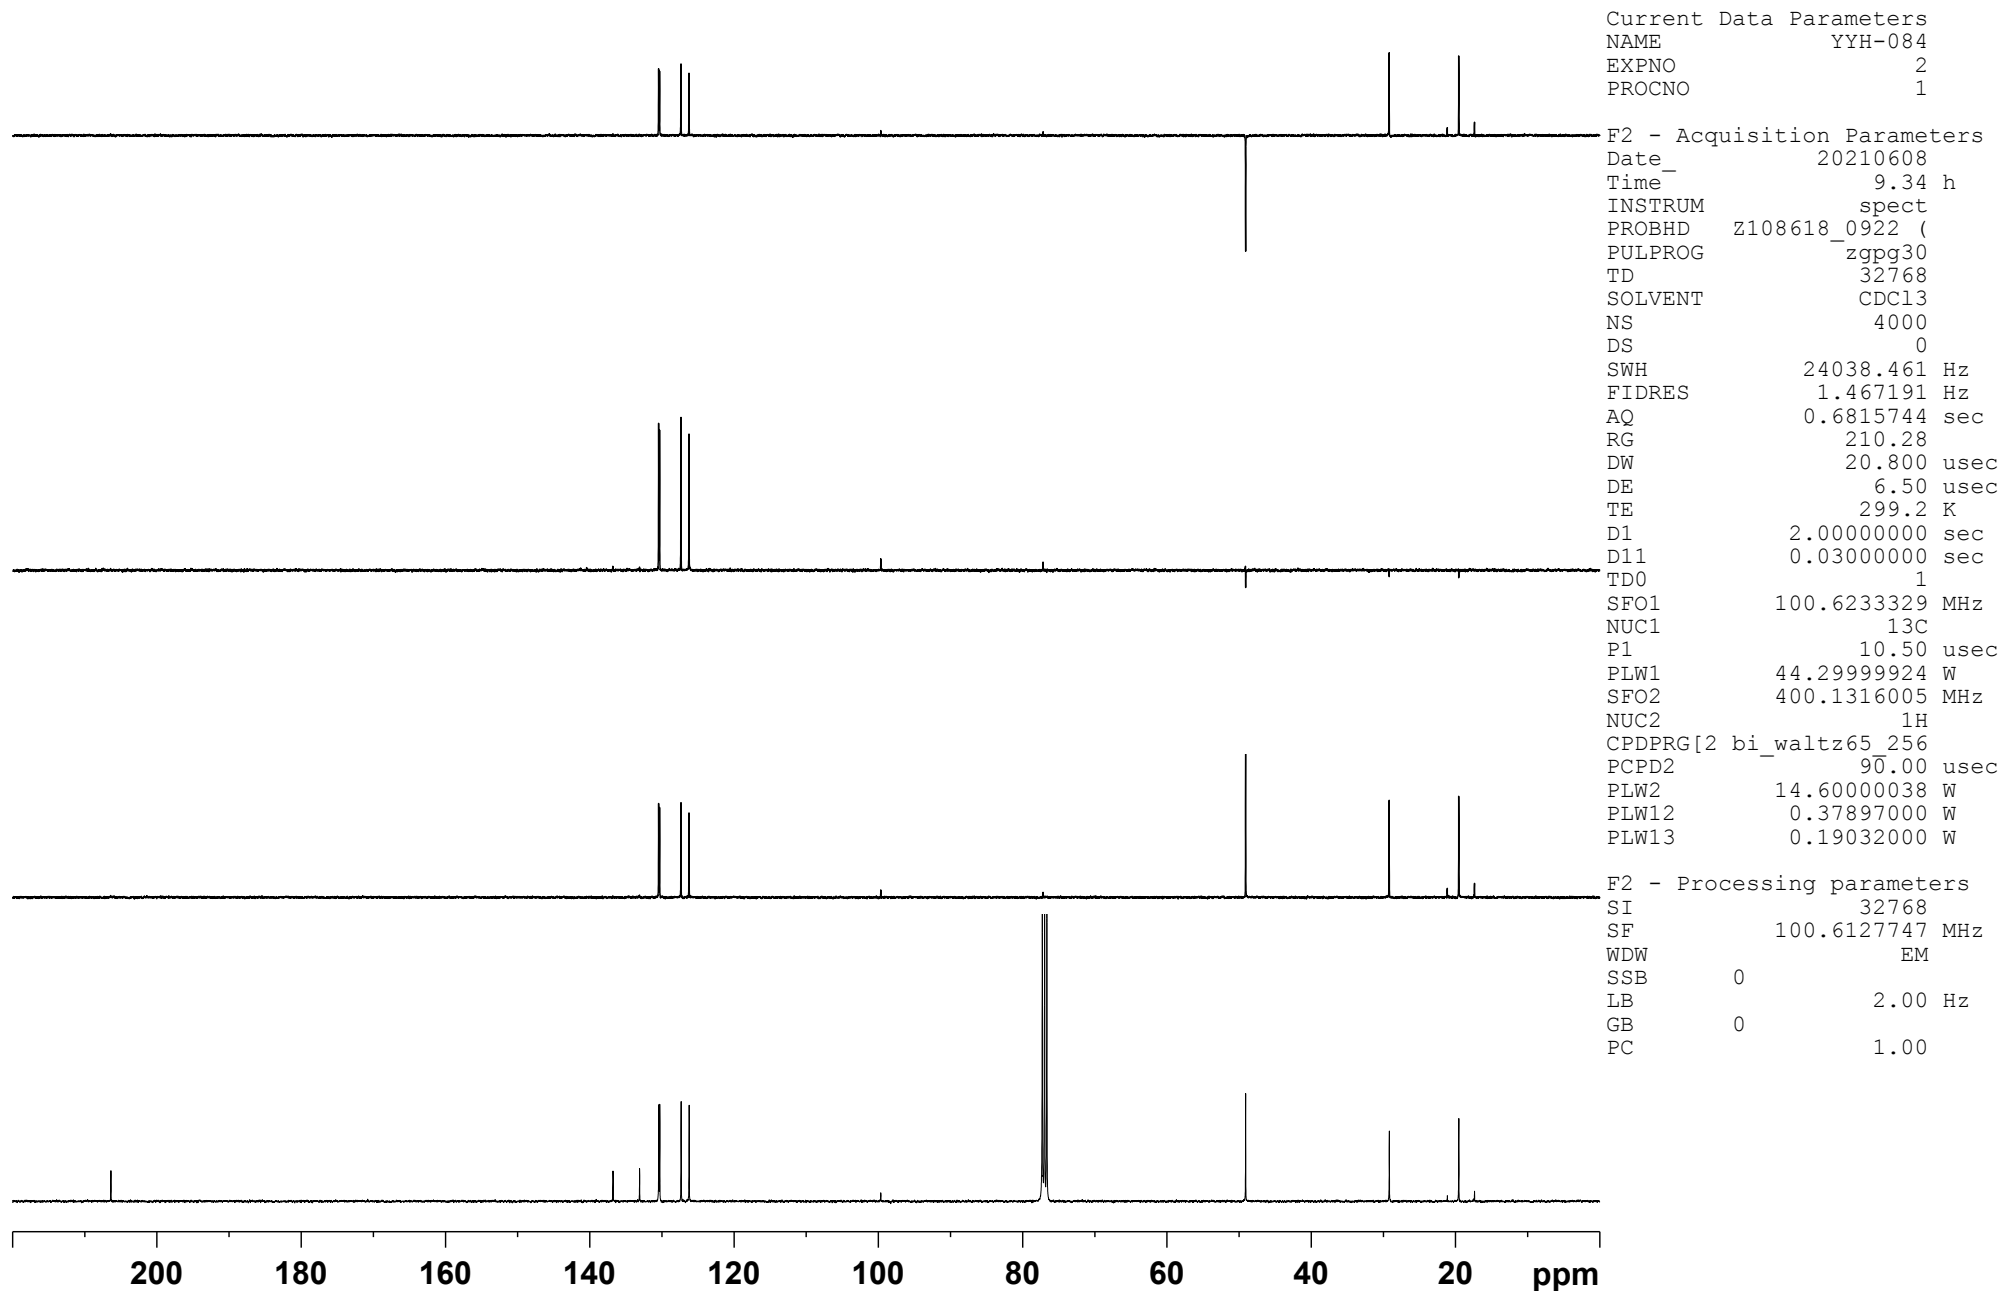



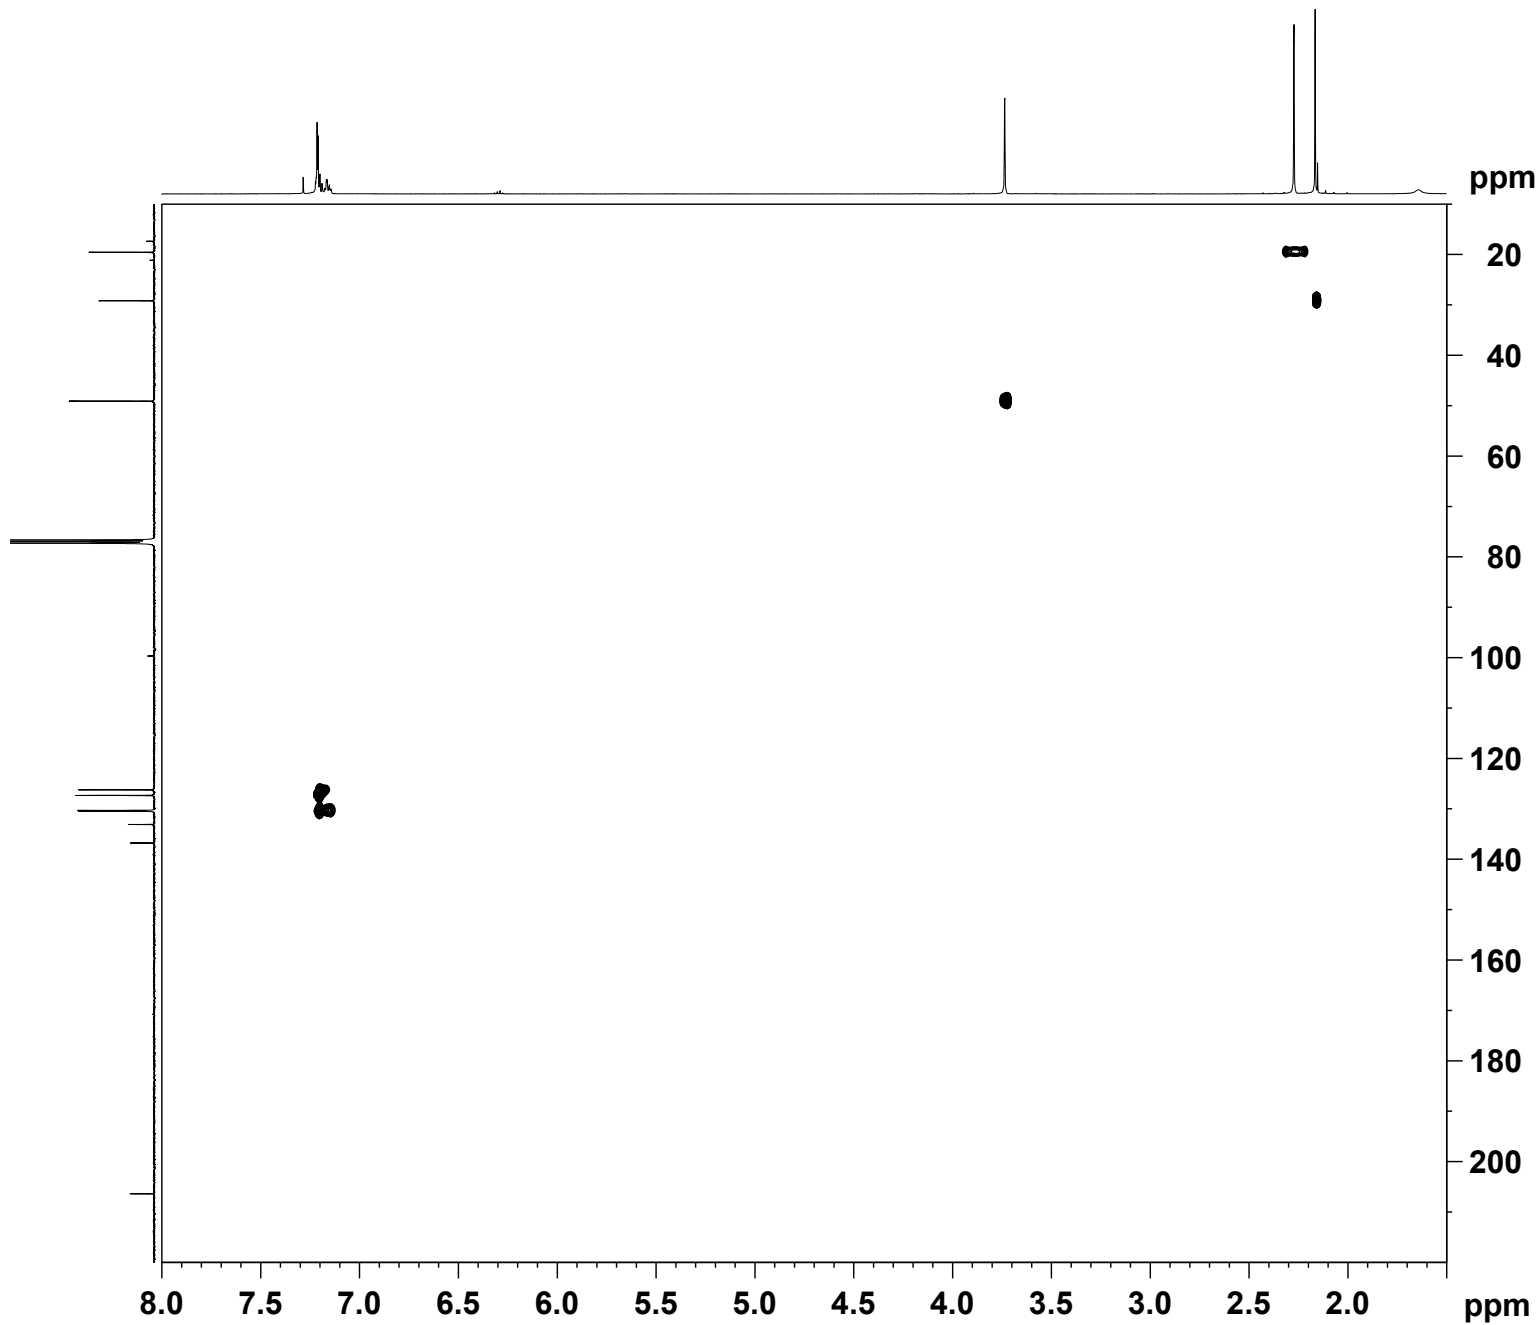

```

Current Data Parameters
NAME      YYH-084
EXPNO    6
PROCNO   1

F2 - Acquisition Parameters
Date_    20210608
Time     3.45 h
INSTRUM  spect
PROBHD   Z108618_0922 (
PULPROG  hsqcetgpsisp2.2
TD       2048
SOLVENT  CDCl3
NS       6
DS       16
SWH      8012.820 Hz
FIDRES   7.825020 Hz
AQ       0.1277952 sec
RG       210.28
DW       62.400 usec
DE       6.50 usec
TE       298.1 K
CNST2    145.0000000
CNST17   -0.5000000
D0        0.00000300 sec
D1        1.50000000 sec
D4        0.00172414 sec
D11       0.03000000 sec
D16       0.00020000 sec
D24       0.00086207 sec
IN0       0.00002080 sec
TDav      1
SFO1     400.1324008 MHz
NUC1      1H
P1        14.50 usec
P2        29.00 usec
P28       1000.00 usec
PLW1     13.10000038 W
SFO2     100.6233329 MHz
NUC2      13C
CPDPRG[2] garp
P3        10.50 usec
P14       500.00 usec
P24       2000.00 usec
PCPD2     80.00 usec
PLW0      0 W
PLW2     44.00000000 W
PLW12    0.75796998 W
SPNAM[3] Crp60,0.5,20.1
SFOAL3   0.500
SPOFFS3  0 Hz
SPW3     7.41179991 W
SPNAM[7] Crp60comp.4
SFOAL7   0.500
SPOFFS7  0 Hz
SPW7     7.41179991 W
GPNAM[1] SMSQ10.100
GPZ1     80.00 %
GPNAM[2] SMSQ10.100
GPZ2     20.10 %
GPNAM[3] SMSQ10.100
GPZ3     11.00 %
GPNAM[4] SMSQ10.100
GPZ4     -5.00 %
P16      1000.00 usec
P19      600.00 usec

F1 - Acquisition parameters
TD       256
SFO1     100.6233 MHz
FIDRES   187.800476 Hz
SW       238.896 ppm
FnMODE   Echo-Antiecho

F2 - Processing parameters
SI       1024
SF       400.1300000 MHz
WDW      QSINE
SSB      2
LB       0 Hz
GB       0
PC       1.40

F1 - Processing parameters
SI       1024
MC2      echo-antiecho
SF       100.6127747 MHz
WDW      QSINE
SSB      2
LB       0 Hz
GB       0
    
```

## COSY of compound 4e

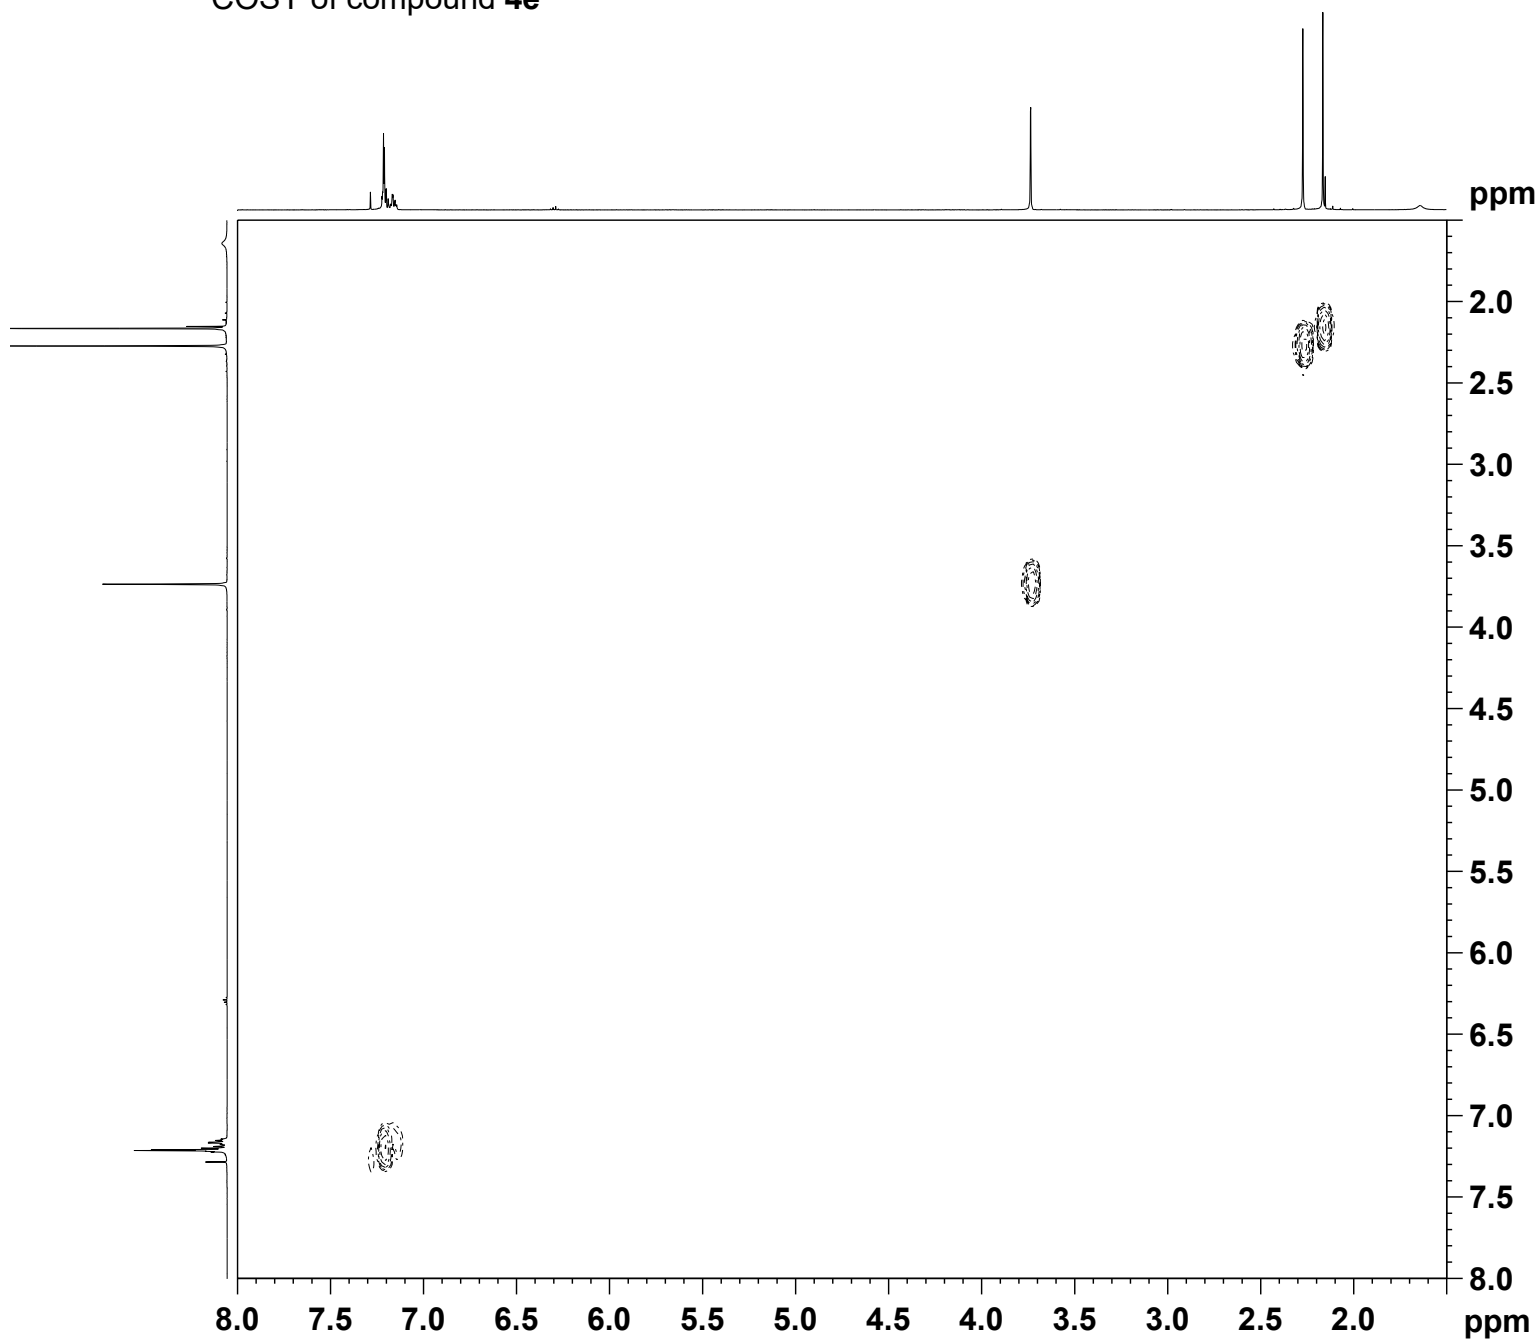

Current Data Parameters  
 NAME YYH-084  
 EXPNO 7  
 PROCNO 1

## F2 - Acquisition Parameters

Date 20210608  
 Time 4.28 h  
 INSTRUM spect  
 PROBHD Z108618 0922 (  
 PULPROG cosygpppqf  
 TD 2048  
 SOLVENT CDCl3  
 NS 6  
 DS 16  
 SWH 8012.820 Hz  
 FIDRES 7.825020 Hz  
 AQ 0.1277952 sec  
 RG 210.28  
 DW 62.400 usec  
 DE 6.50 usec  
 TE 298.1 K  
 D0 0.00000300 sec  
 D1 2.00000000 sec  
 D11 0.03000000 sec  
 D12 0.00002000 sec  
 D13 0.00000400 sec  
 D16 0.00020000 sec  
 IN0 0.00012480 sec  
 T<sub>Dav</sub> 1  
 SFO1 400.1324008 MHz  
 NUC1 1H  
 P0 14.50 usec  
 P1 14.50 usec  
 P17 2500.00 usec  
 PLW1 13.10000038 W  
 PLW10 3.06030011 W  
 GPNAM[1] SMSQ10.100  
 GPZ1 10.00 %  
 P16 1000.00 usec

## F1 - Acquisition parameters

TD 256  
 SFO1 400.1324 MHz  
 FIDRES 62.600159 Hz  
 SW 20.025 ppm  
 F<sub>n</sub>MODE QF

## F2 - Processing parameters

SI 1024  
 SF 400.1300000 MHz  
 WDW QSINE  
 SSB 0  
 LB 0 Hz  
 GB 0  
 PC 1.40

## F1 - Processing parameters

SI 1024  
 MC2 QF  
 SF 400.1300000 MHz  
 WDW QSINE  
 SSB 0  
 LB 0 Hz  
 GB 0

## NOESY of compound 4e

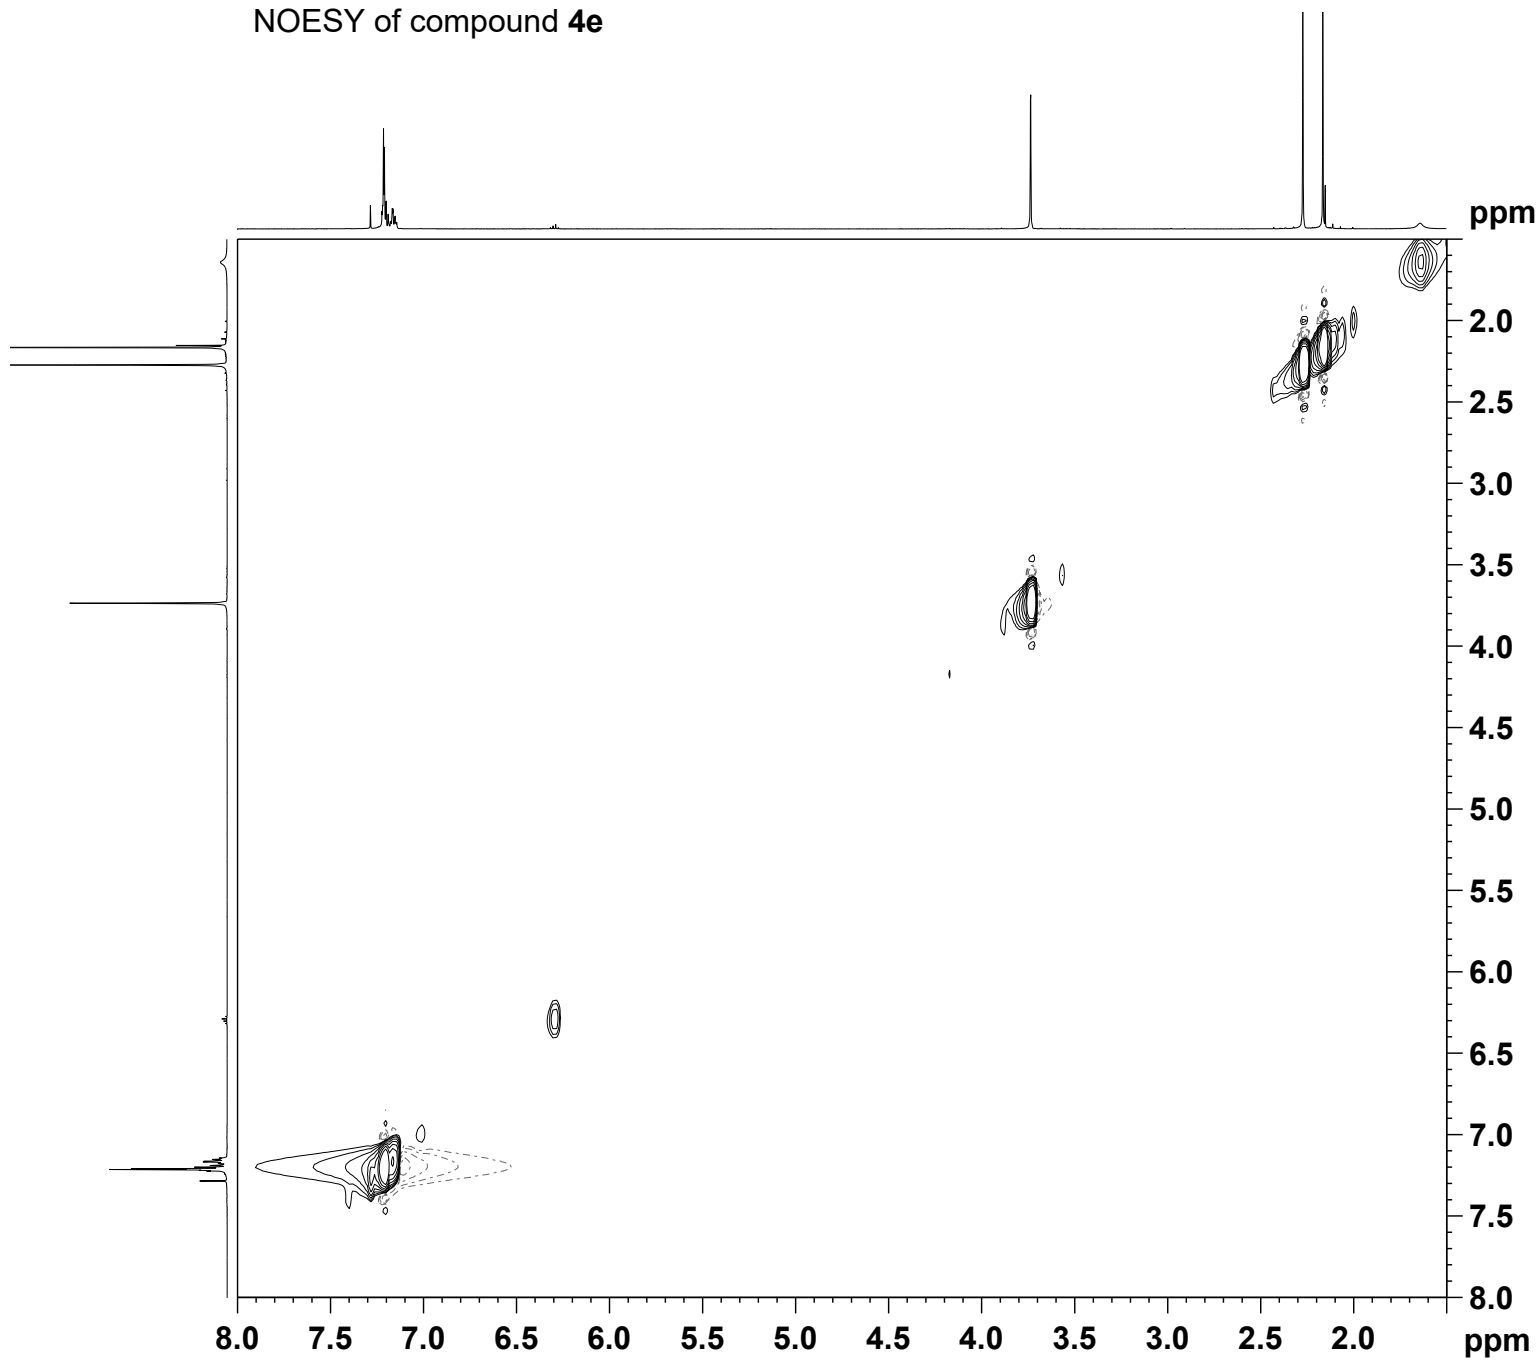

Current Data Parameters  
 NAME YYH-084  
 EXPNO 8  
 PROCNO 1

F2 - Acquisition Parameters  
 Date 20210608  
 Time 5.25 h  
 INSTRUM spect  
 PROBHD Z108618\_0922 (  
 PULPROG noesygpphpp  
 TD 2048  
 SOLVENT CDCl3  
 NS 6  
 DS 16  
 SWH 8012.820 Hz  
 FIDRES 7.825020 Hz  
 AQ 0.1277952 sec  
 RG 210.28  
 DW 62.400 usec  
 DE 6.50 usec  
 TE 297.5 K  
 D0 0.00004394 sec  
 D1 2.00000000 sec  
 D8 0.40000001 sec  
 D11 0.03000000 sec  
 D12 0.00002000 sec  
 D16 0.00020000 sec  
 IN0 0.00012480 sec  
 T Dav 1  
 SFO1 400.1324008 MHz  
 NUC1 1H  
 P1 14.50 usec  
 P2 29.00 usec  
 P17 2500.00 usec  
 PLW1 13.10000038 W  
 PLW10 3.06030011 W  
 GPNAM[1] SMSQ10.100  
 GPZ1 40.00 %  
 P16 1000.00 usec

F1 - Acquisition parameters  
 TD 256  
 SFO1 400.1324 MHz  
 FIDRES 62.600159 Hz  
 SW 20.025 ppm  
 FnMODE States-TPPI

F2 - Processing parameters  
 SI 1024  
 SF 400.1300000 MHz  
 WDW QSINE  
 SSB 2  
 LB 0 Hz  
 GB 0  
 PC 1.40

F1 - Processing parameters  
 SI 1024  
 MC2 States-TPPI  
 SF 400.1300000 MHz  
 WDW QSINE  
 SSB 2  
 LB 0 Hz  
 GB 0

Sample Name **YYH-079**  
Date collected **2021-07-26**

Pulse sequence **PROTON**  
Solvent **cdcl3**

Temperature **25**  
Spectrometer **Agilent-NMR-inova500**

Study owner **vnmr2**  
Operator **vnmr2**

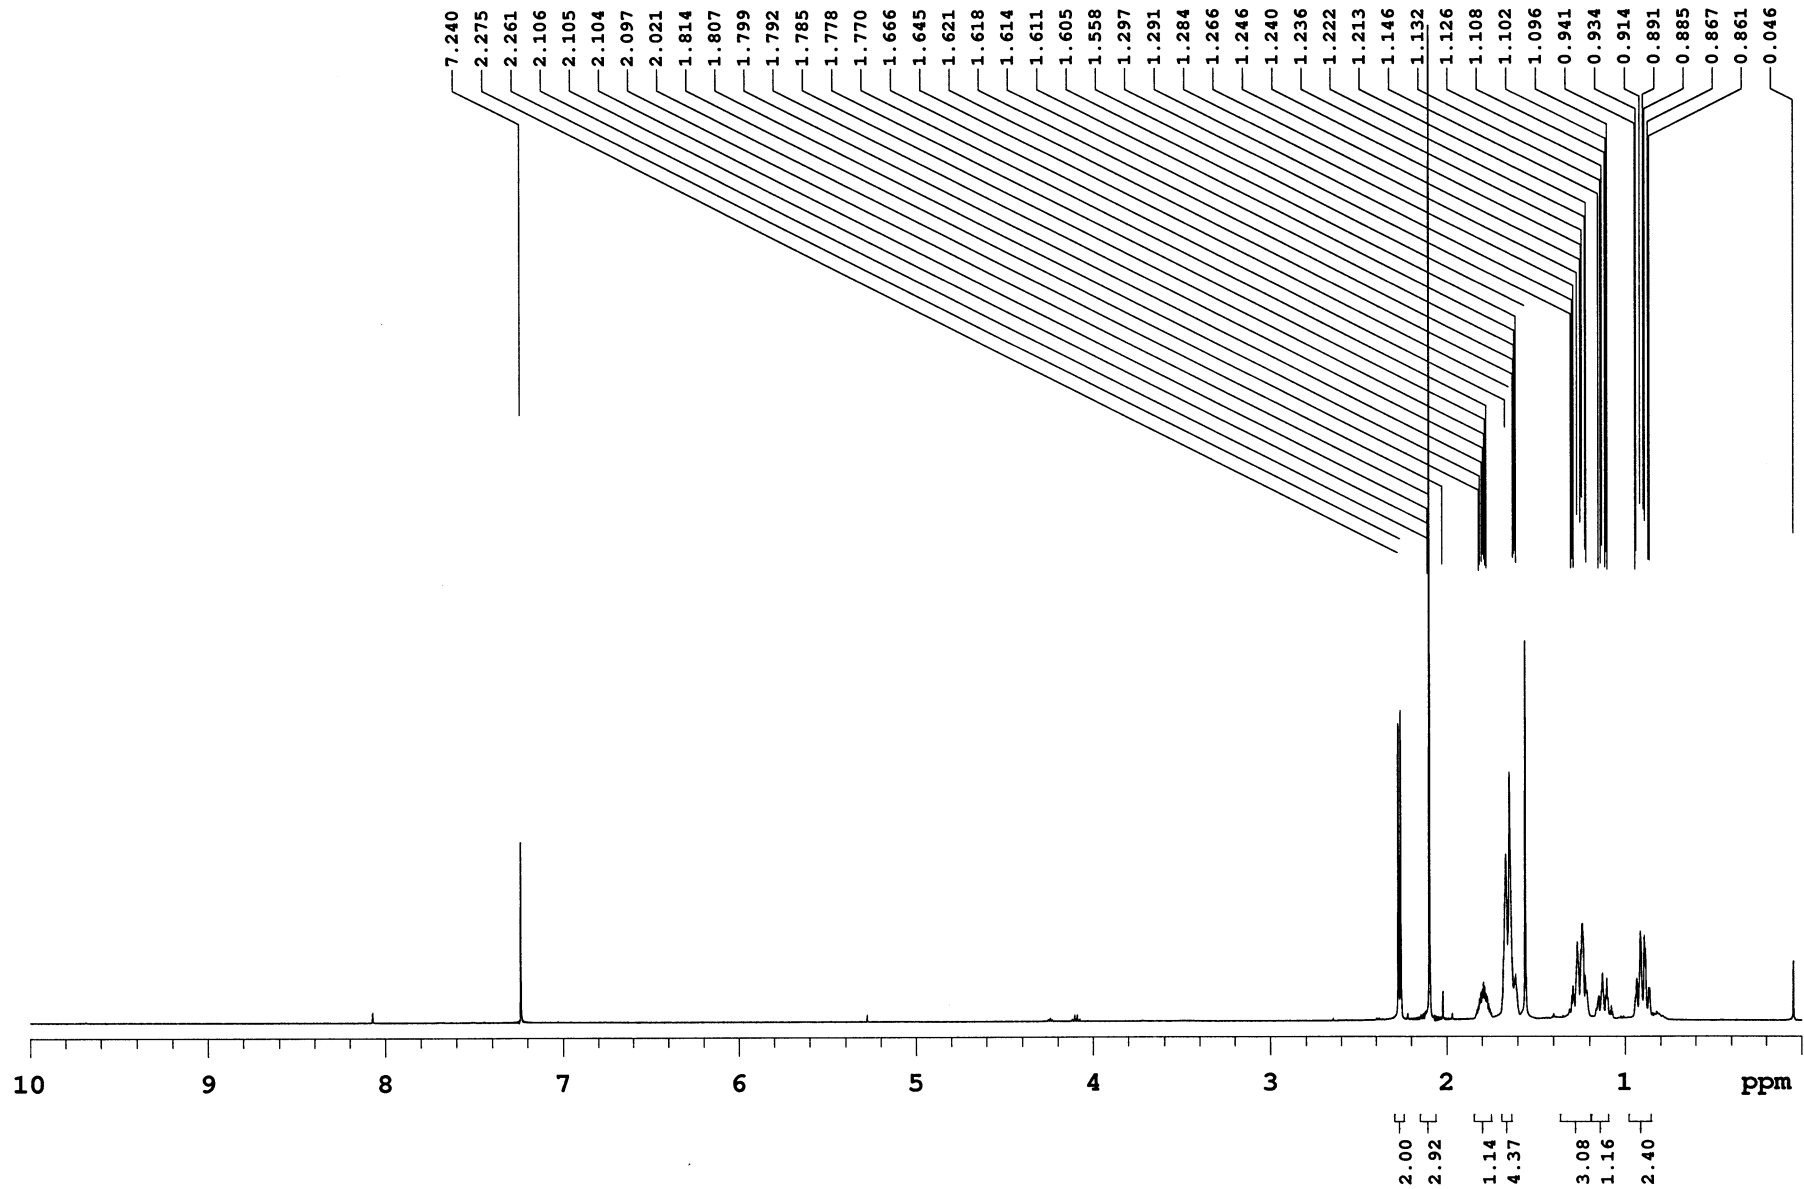

1H NMR (CDCl<sub>3</sub>, 500 MHz) of compound 4f

Sample Name **YYH-079**  
Date collected **2021-07-26**

Pulse sequence **CARBON**  
Solvent **cdcl3**

Temperature **25**  
Spectrometer **Agilent-NMR-inova500**

Study owner **vnmr2**  
Operator **vnmr2**

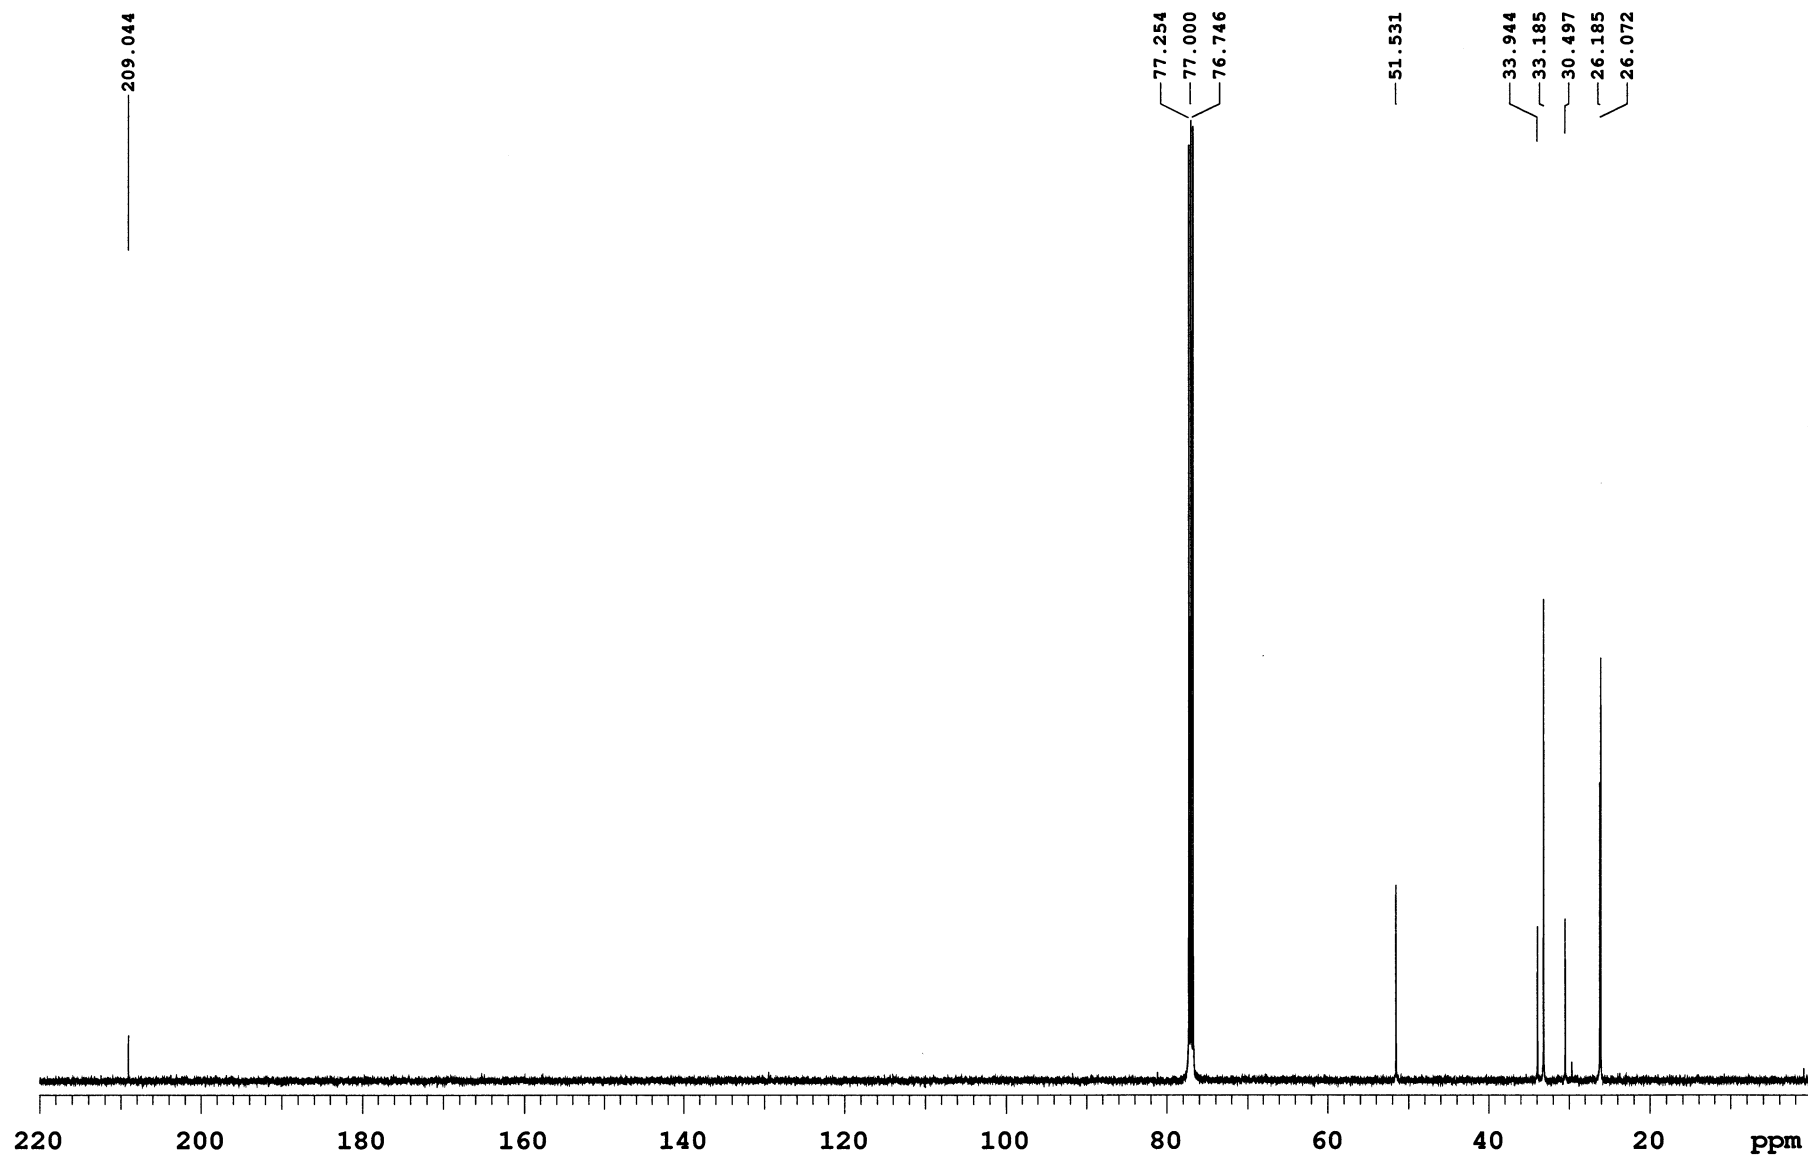

13C NMR (CDCl<sub>3</sub>, 125 MHz) of compound 4f

Sample Name **YYH-079**  
Date collected **2021-08-06**

Pulse sequence **DEPT**  
Solvent **cdcl3**

Temperature **25**  
Spectrometer **Agilent-NMR-inova500**

Study owner **vnmr2**  
Operator **vnmr2**

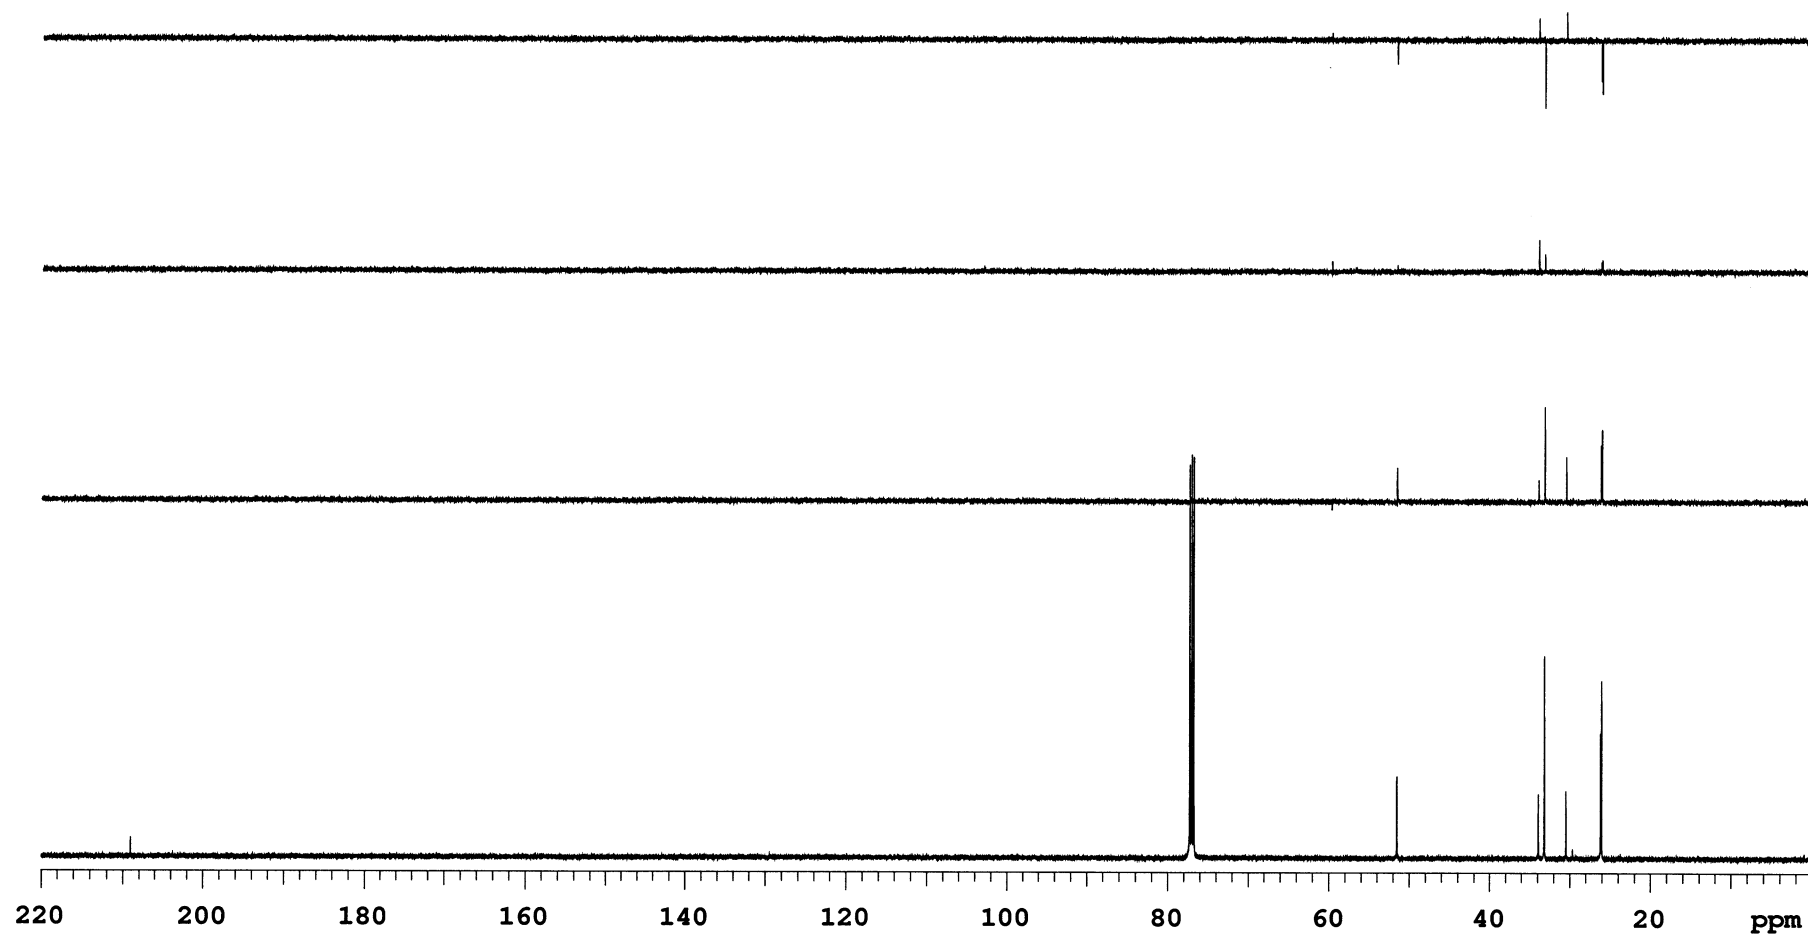

DEPT of compound **4f**

Sample Name **YYH-079**  
Date collected **2021-07-27**

Pulse sequence **gHSQC**  
Solvent **cdcl3**

Temperature **25**  
Spectrometer **Agilent-NMR-inova500**

Study owner **vnmr2**  
Operator **vnmr2**

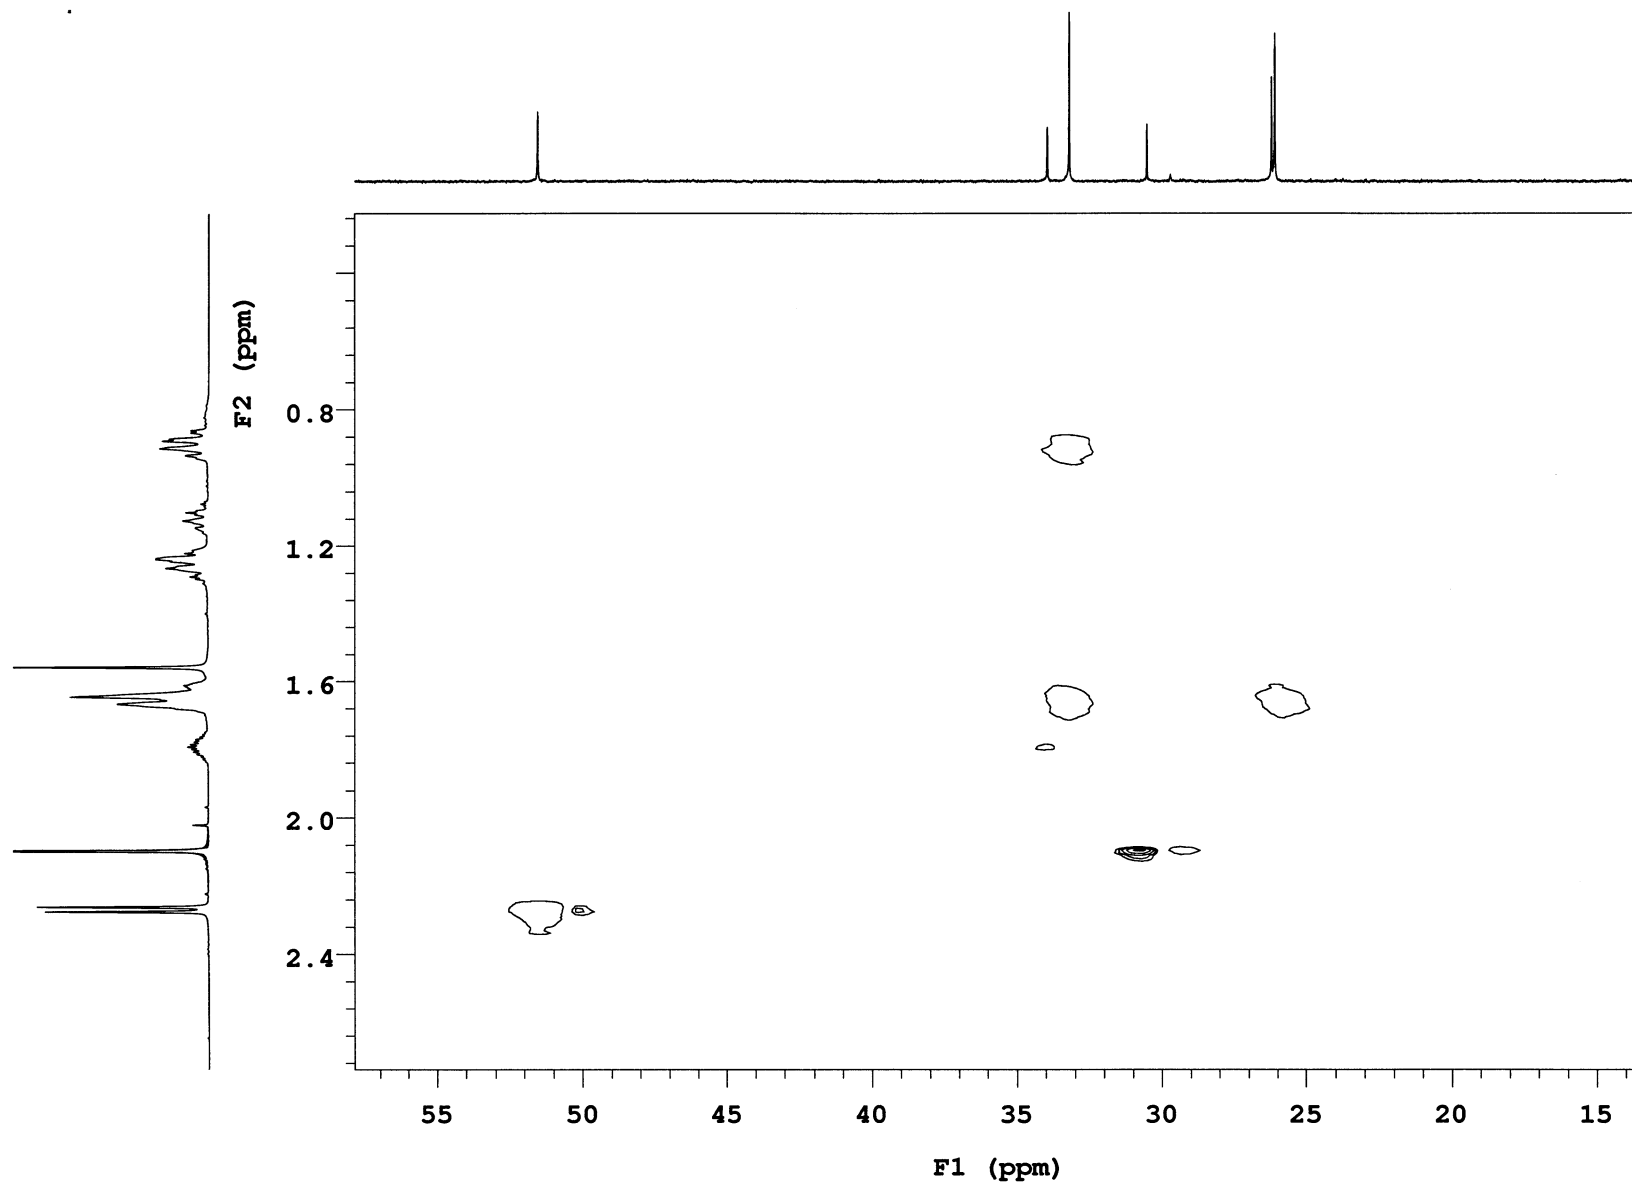

Sample Name **YYH-079**  
Date collected **2021-07-27**

Pulse sequence **gCOSY**  
Solvent **cdcl3**

Temperature **25**  
Spectrometer **Agilent-NMR-inova500**

Study owner **vnmr2**  
Operator **vnmr2**

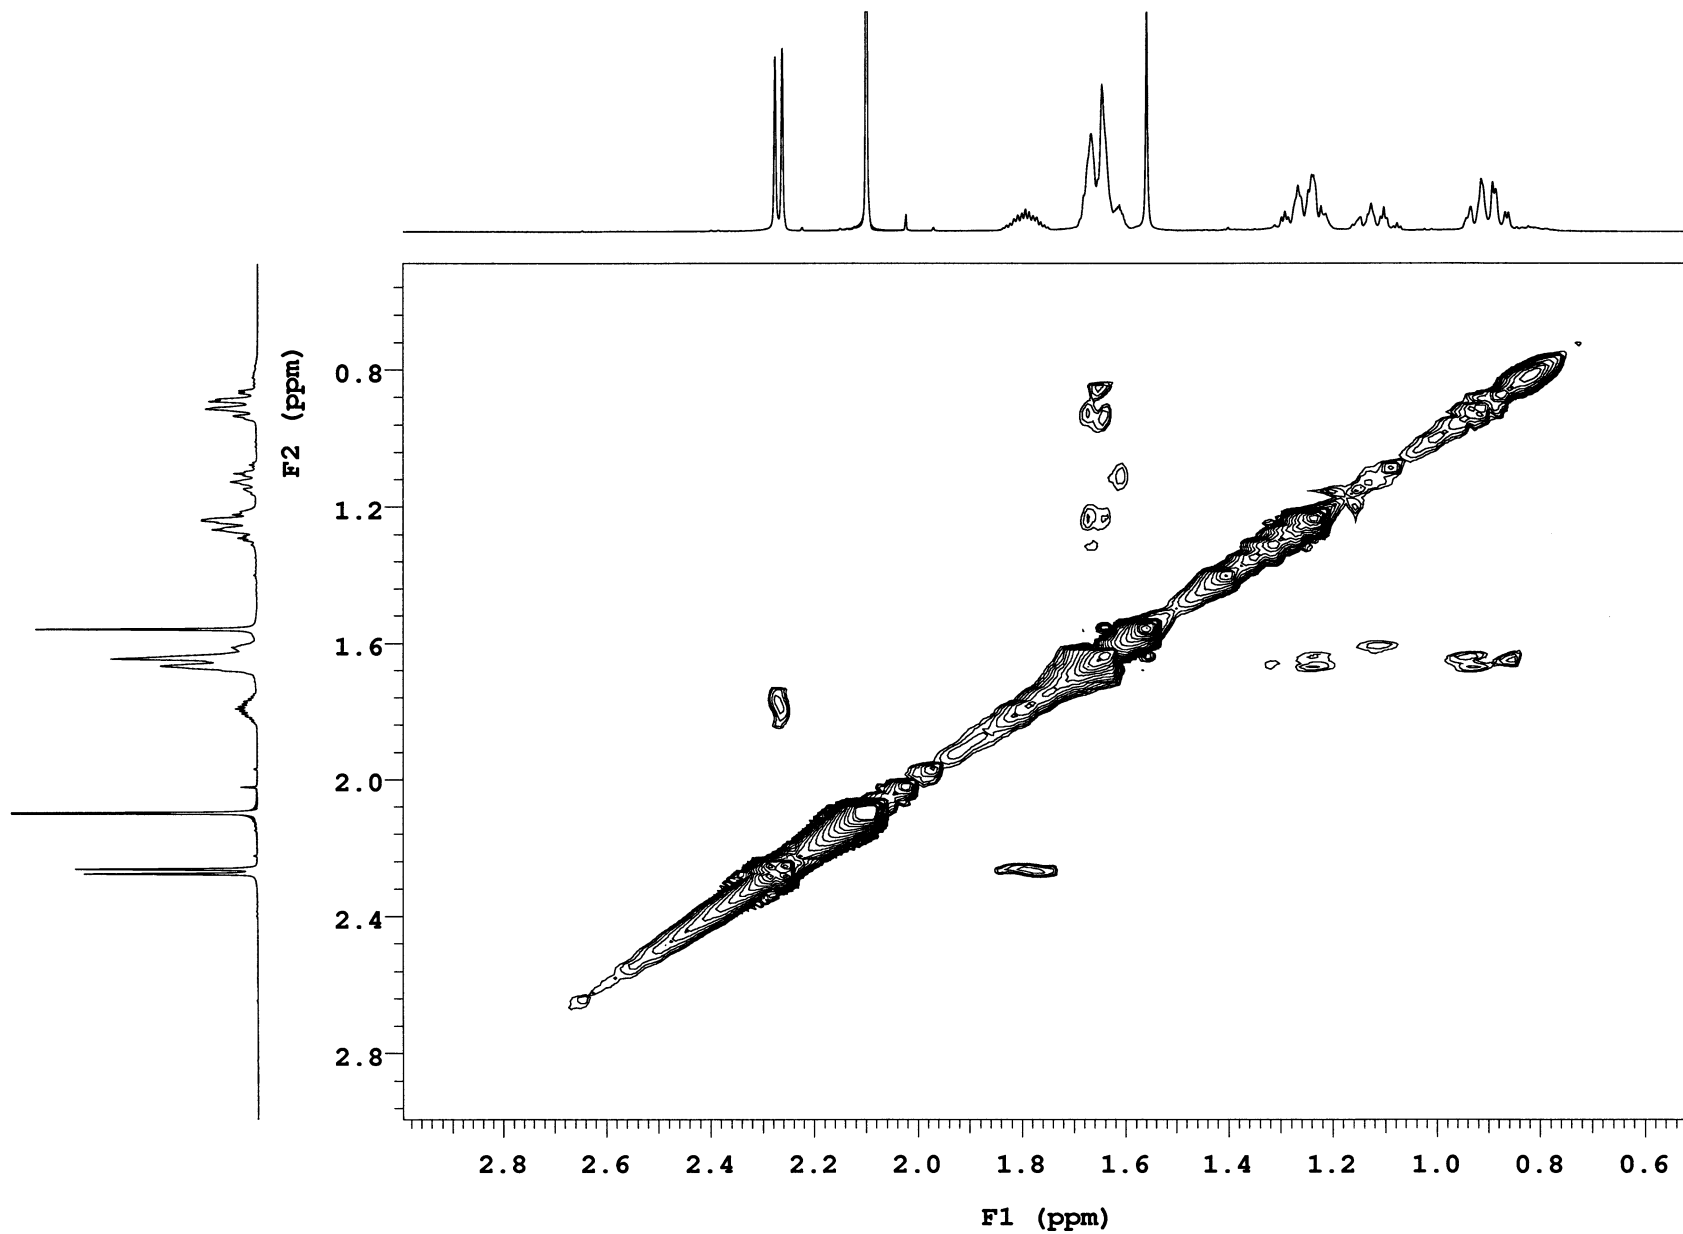

COSY of compound 4f



Sample Name **YYH-079**  
Date collected **2021-07-27**

Pulse sequence **NOESY**  
Solvent **cdcl3**

Temperature **25**  
Spectrometer **Agilent-NMR-inova500**

Study owner **vnmr2**  
Operator **vnmr2**

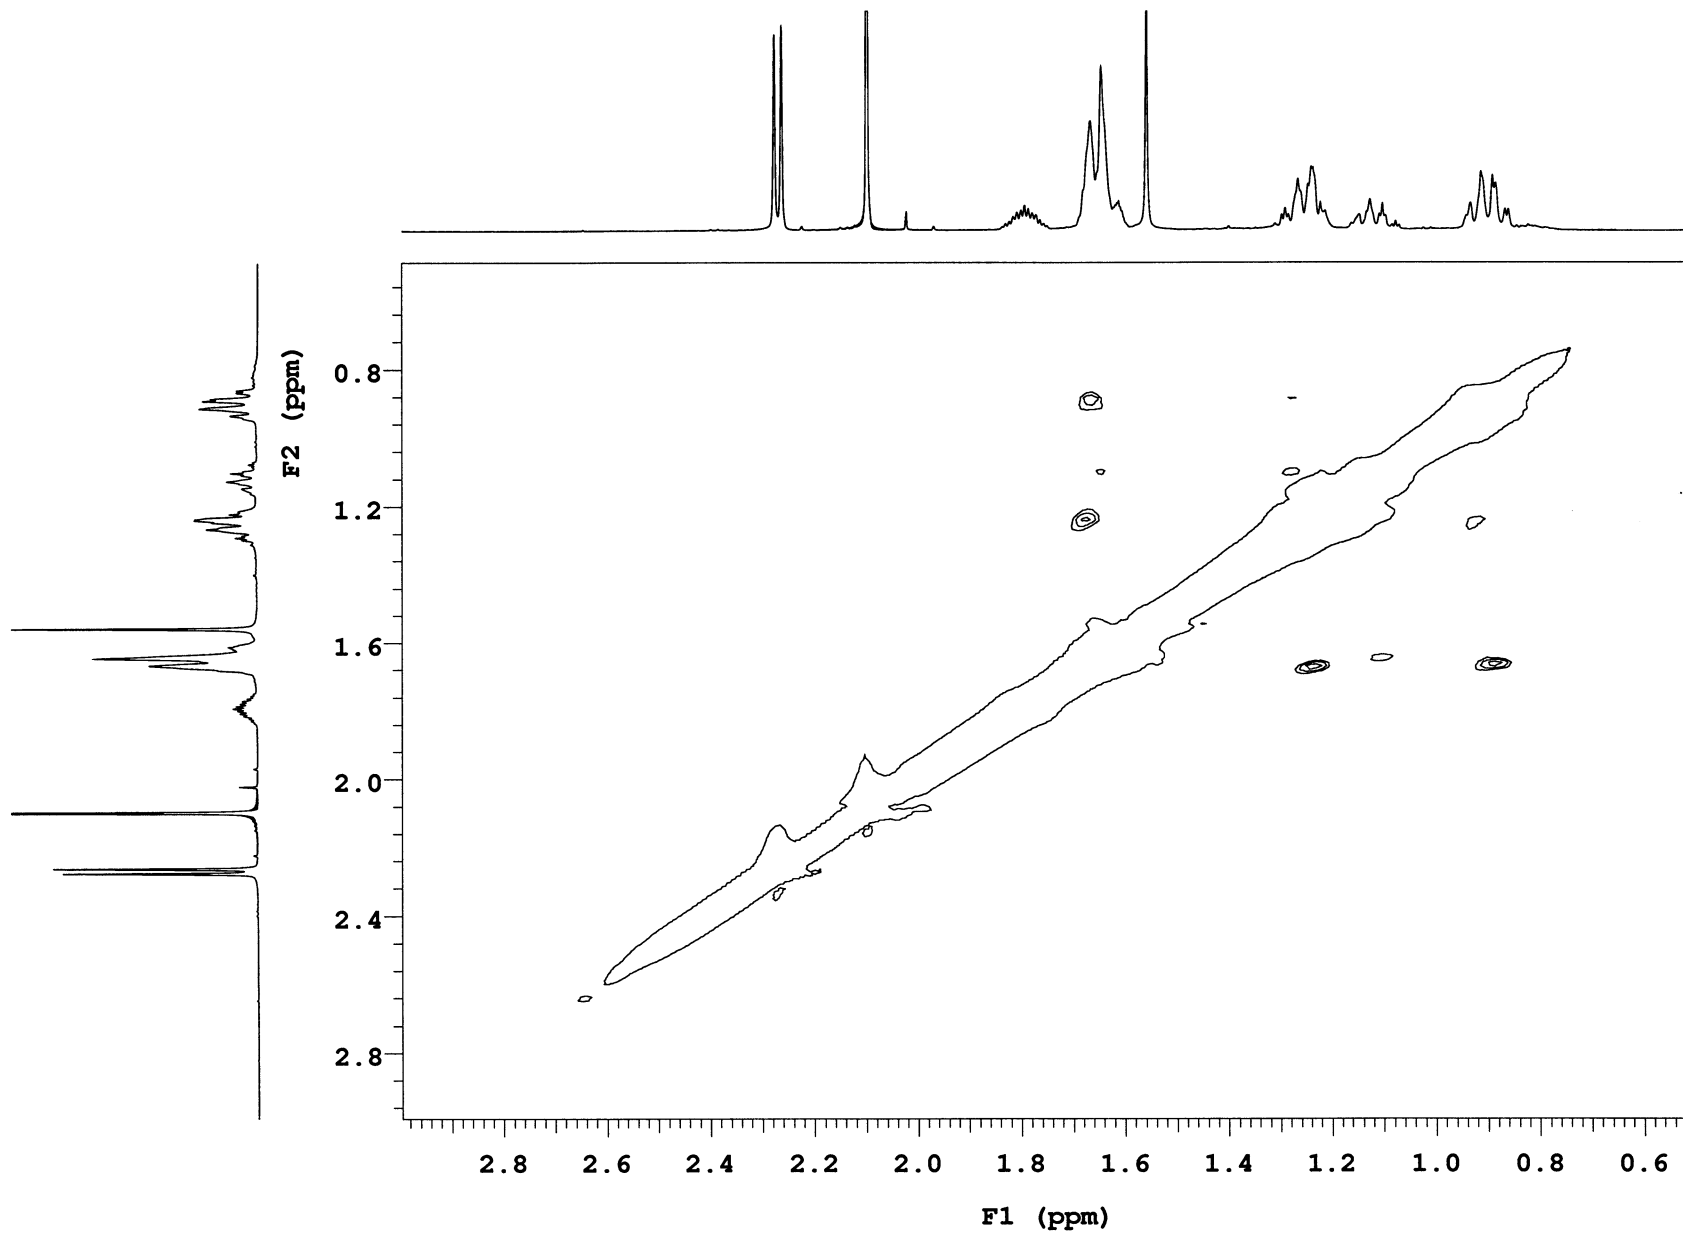

NOESY of compound 4f

Sample Name YYH-080  
Date collected 2021-06-23

Pulse sequence PROTON  
Solvent cdcl3

Temperature 25  
Spectrometer Agilent-NMR-inova500

Study owner vnmr2  
Operator vnmr2

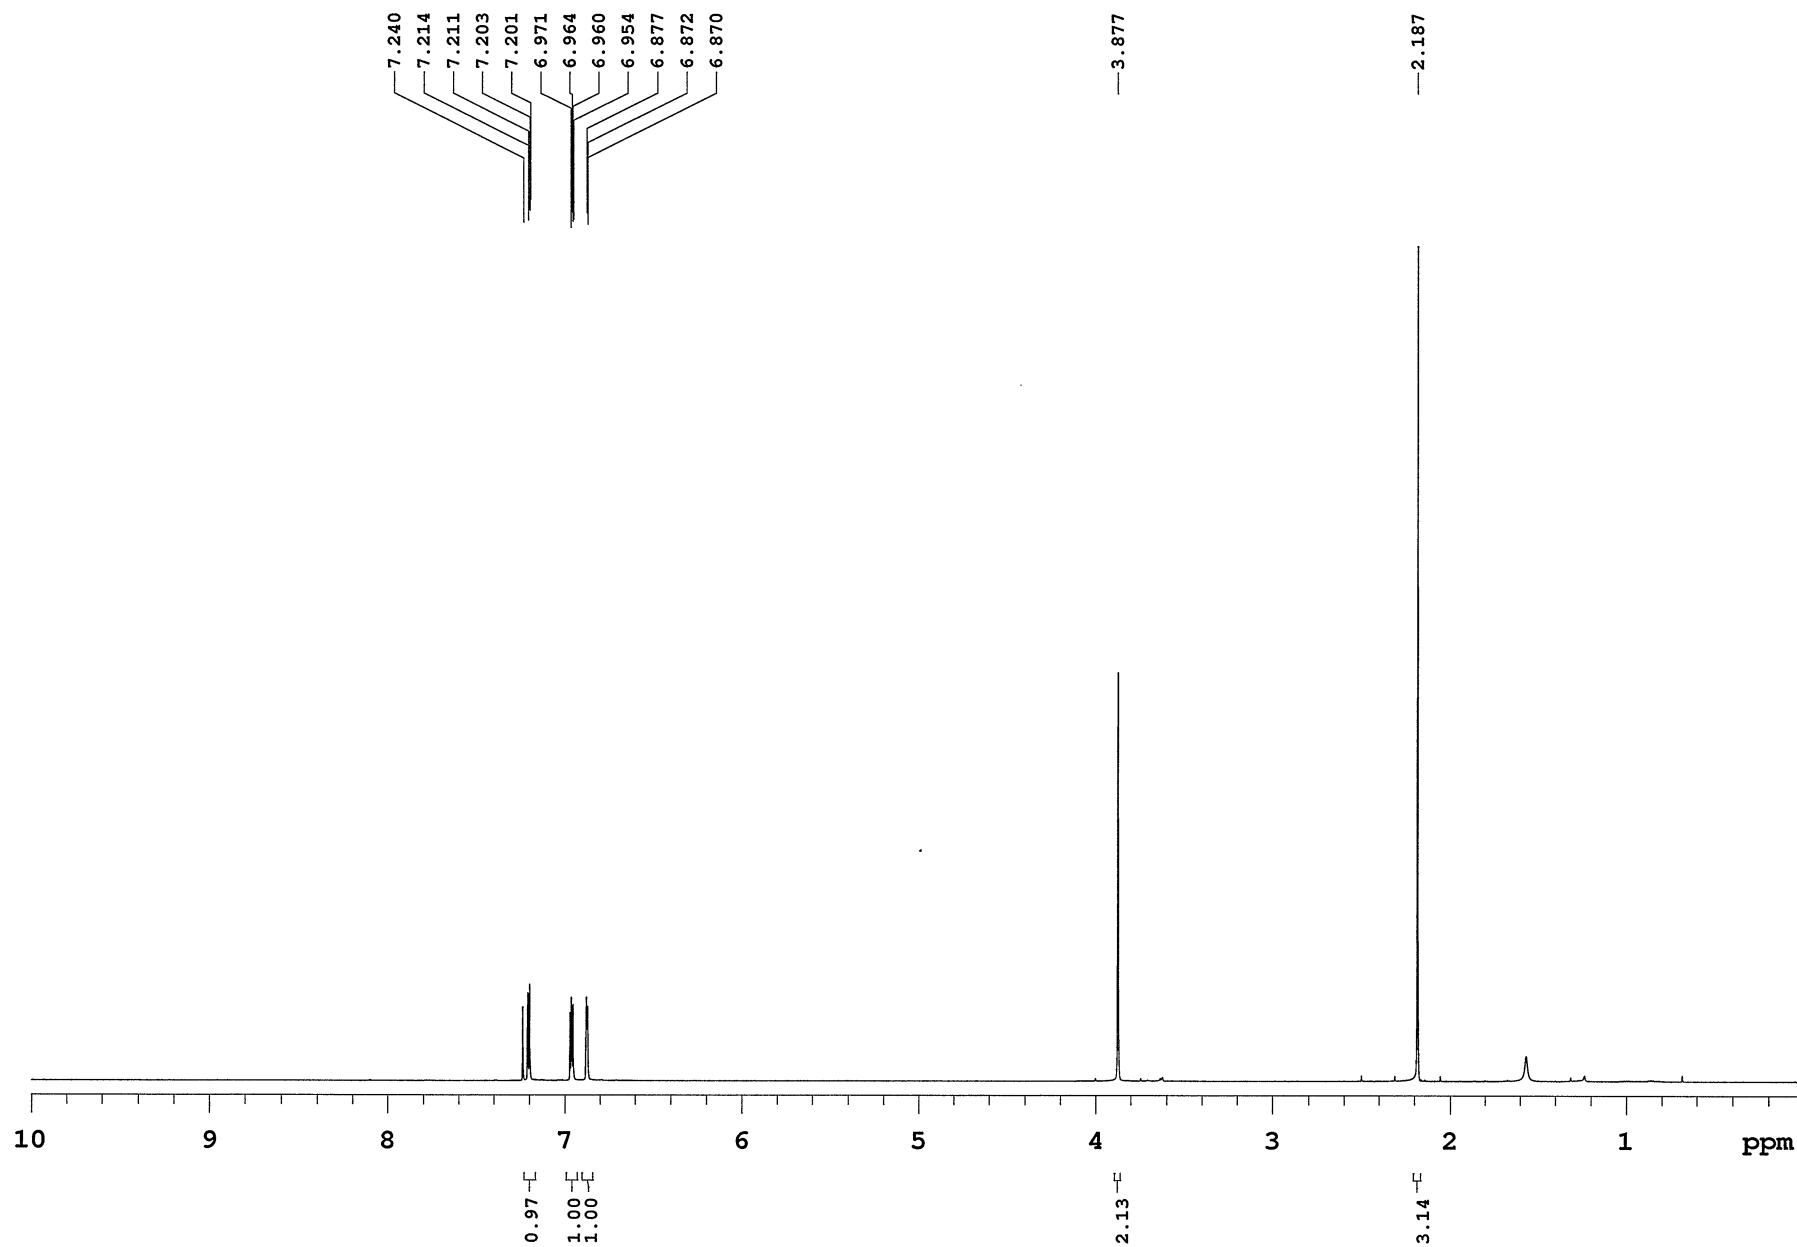

Sample Name **YYH-080**  
Date collected **2021-06-23**

Pulse sequence **CARBON**  
Solvent **cdcl3**

Temperature **25**  
Spectrometer **Agilent-NMR-inova500**

Study owner **vnmr2**  
Operator **vnmr2**

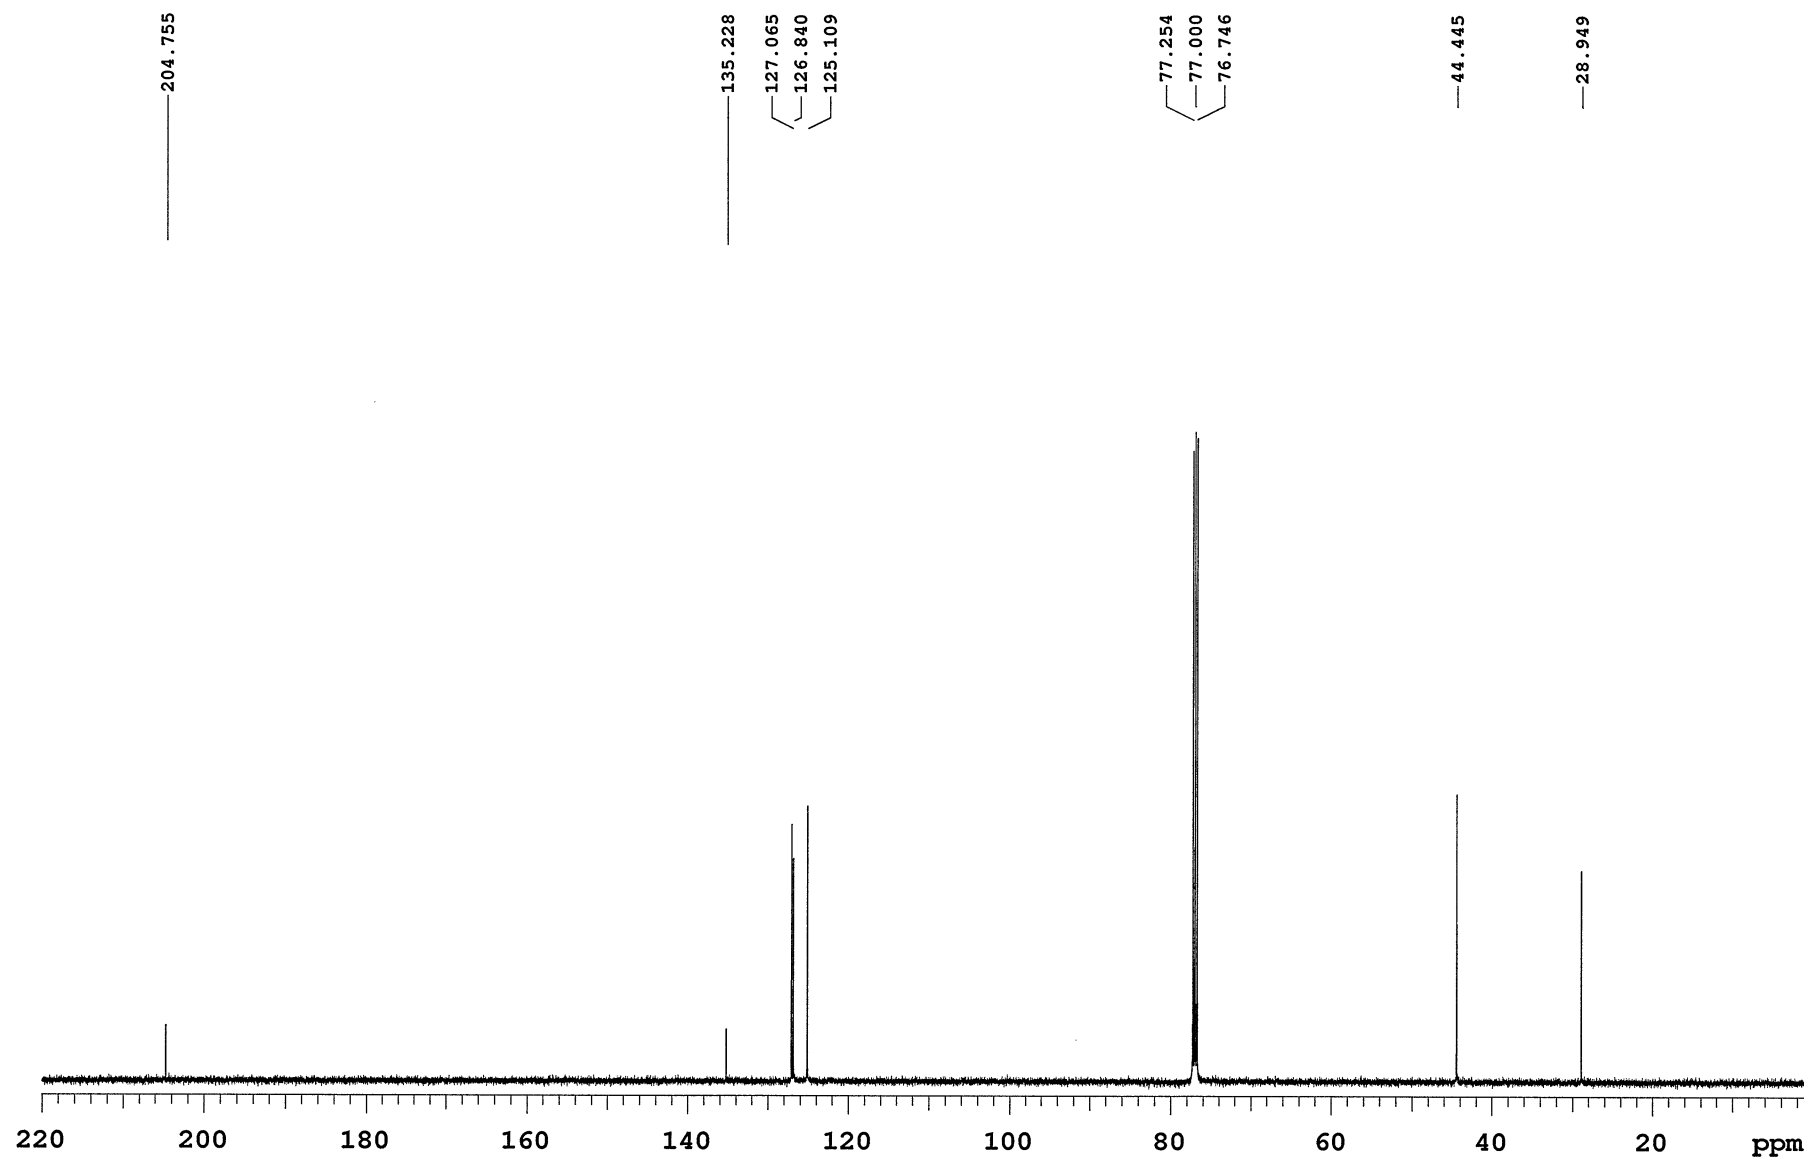

13C NMR (CDCl<sub>3</sub>, 125 MHz) of compound **4g**

Sample Name **YYH-080**  
Date collected **2021-06-24**

Pulse sequence **DEPT**  
Solvent **cdcl3**

Temperature **25**  
Spectrometer **Agilent-NMR-inova500**

Study owner **vnmr2**  
Operator **vnmr2**

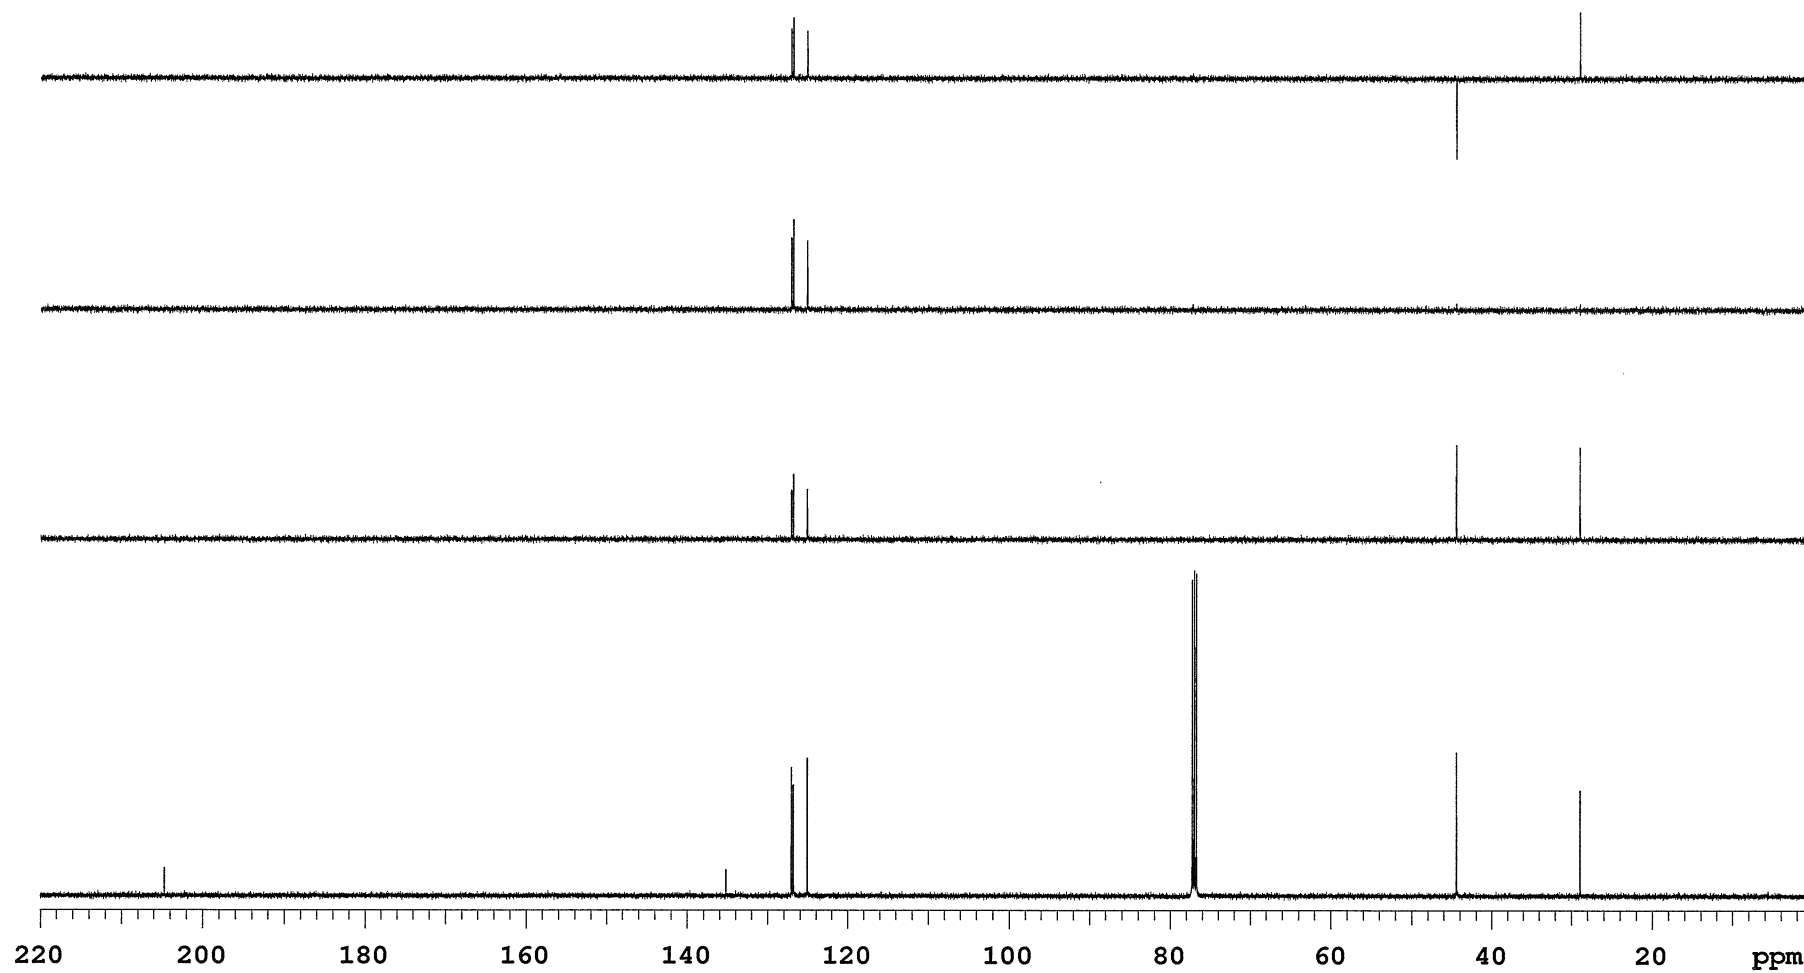

## DEPT of compound 4g

YYH-080

Sample Name YYH-080  
Date collected 2021-06-24Pulse sequence gHSQC  
Solvent cdcl3Temperature 25  
Spectrometer Agilent-NMR-inova500Study owner vnmr2  
Operator vnmr2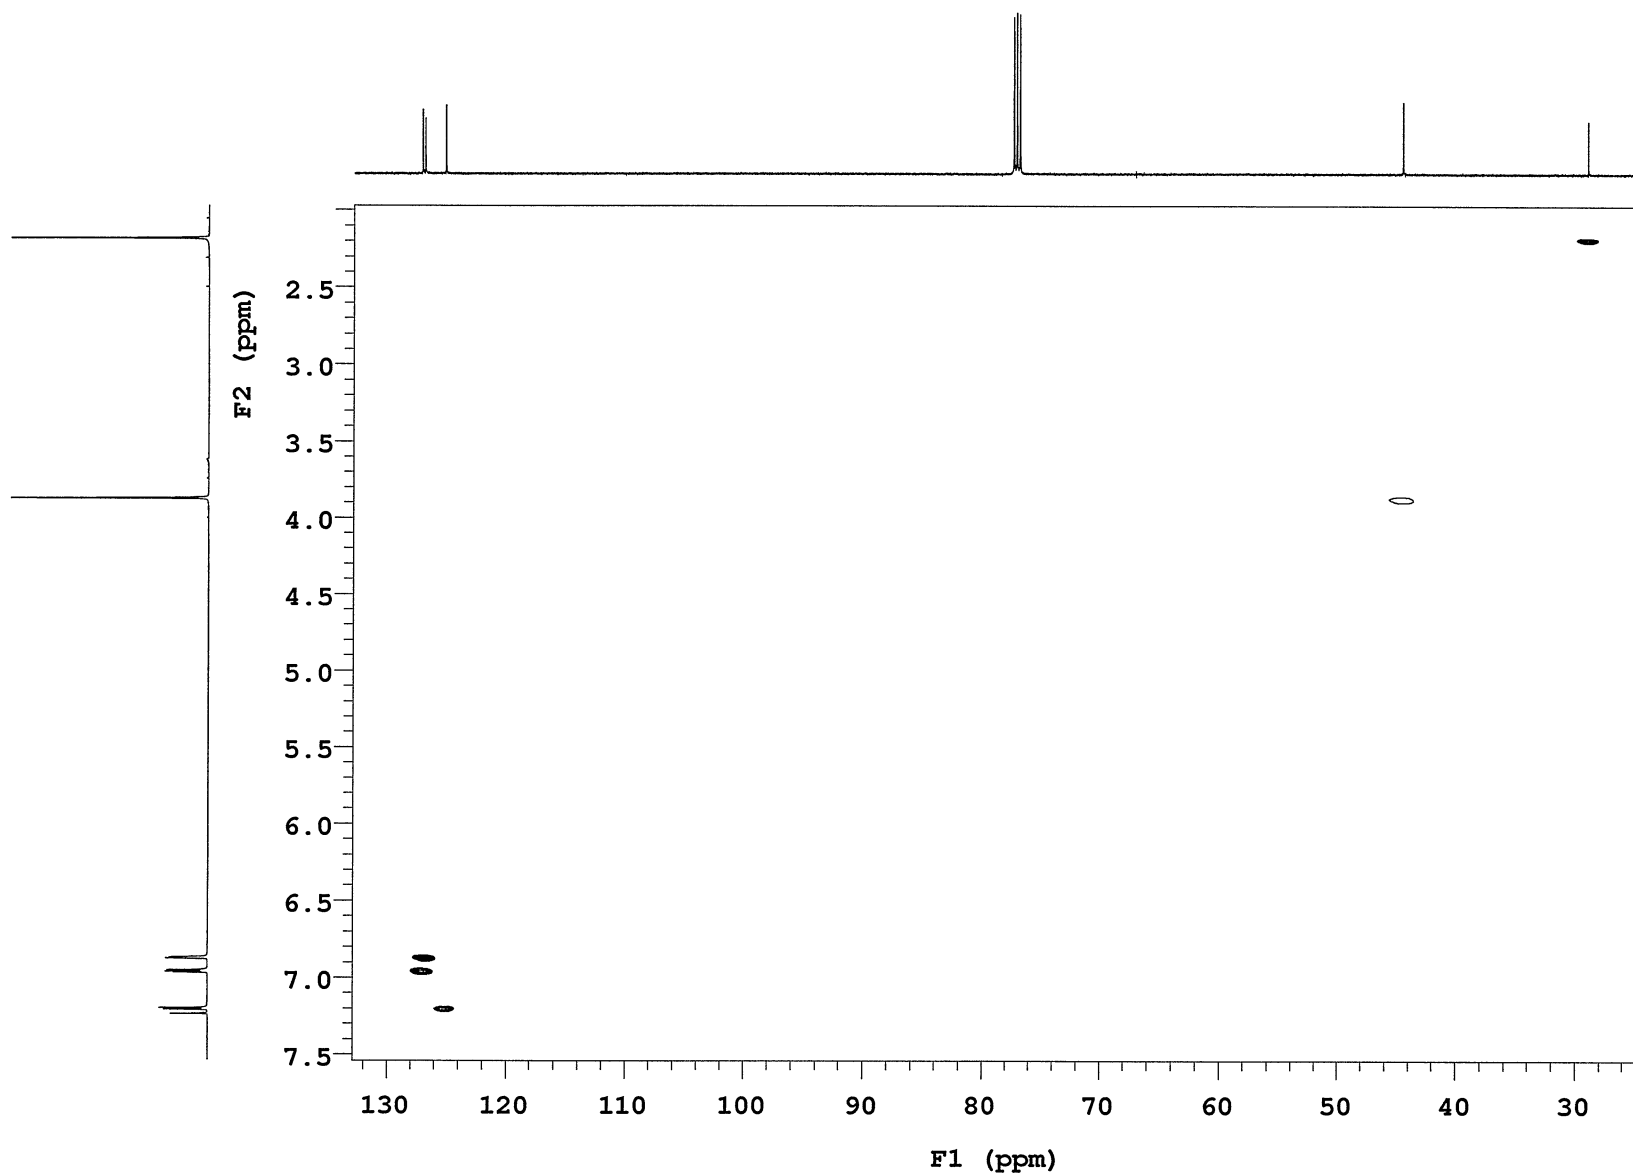

HSQC of compound 4g

Sample Name **YYH-080**  
Date collected **2021-06-24**

Pulse sequence **gCOSY**  
Solvent **cdcl3**

Temperature **25**  
Spectrometer **Agilent-NMR-inova500**

Study owner **vnmr2**  
Operator **vnmr2**

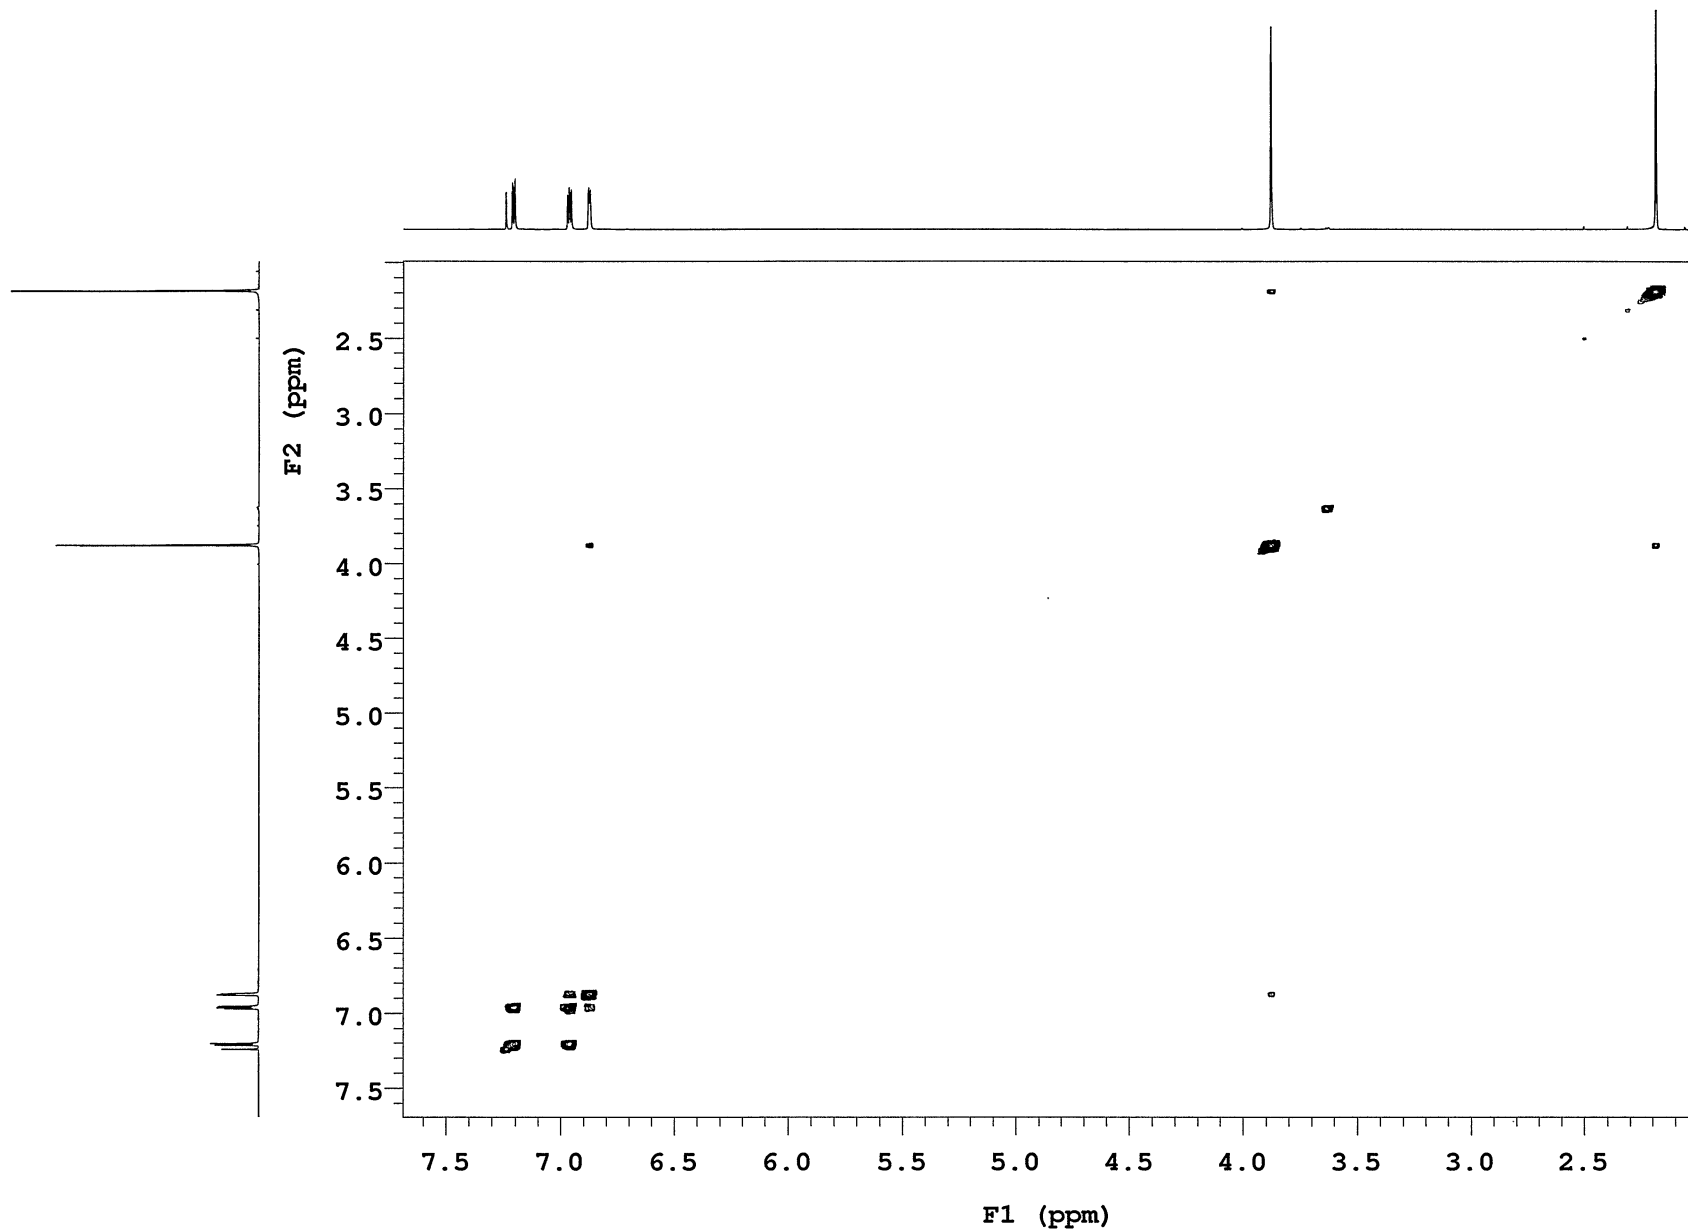

COSY of compound 4g

Sample Name **YYH-080**  
Date collected **2021-06-24**

Pulse sequence **NOESY**  
Solvent **cdcl3**

Temperature **25**  
Spectrometer **Agilent-NMR-inova500**

Study owner **vnmr2**  
Operator **vnmr2**

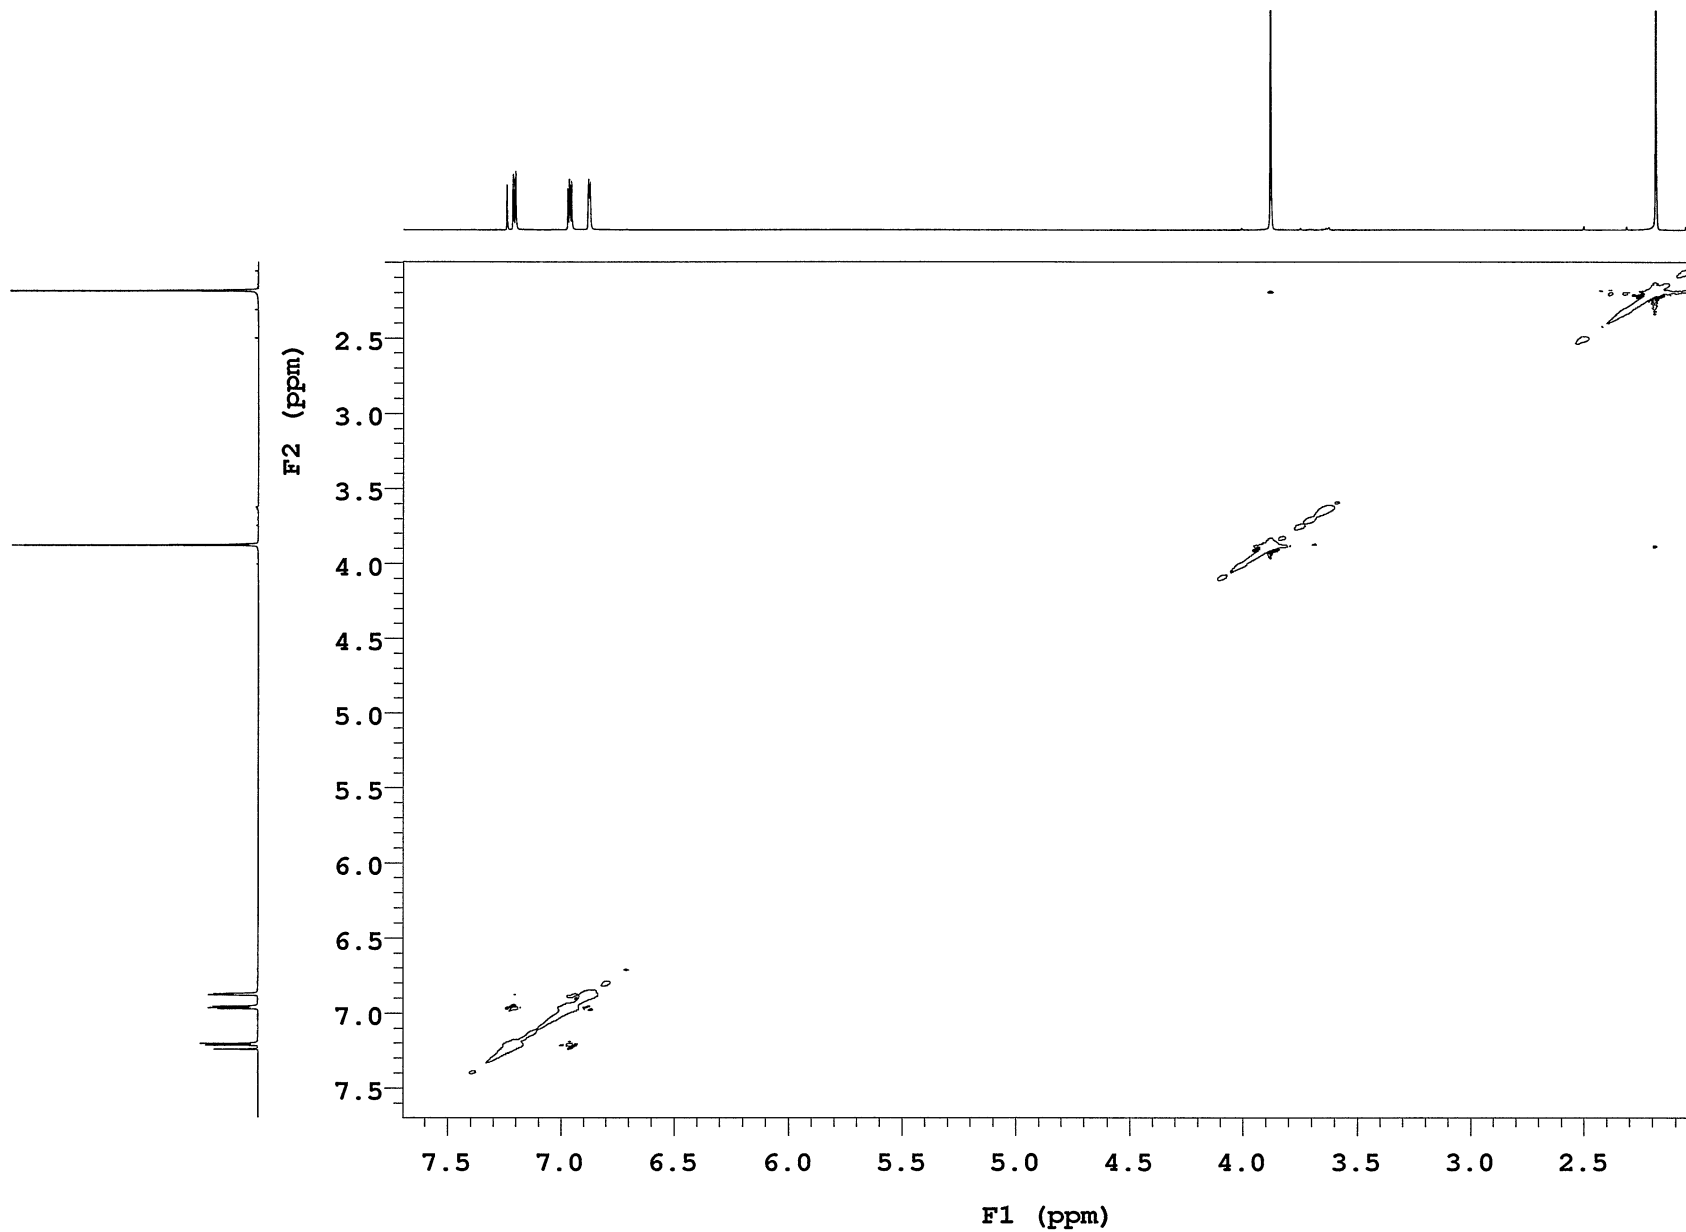NOESY of compound **4g**

Sample Name **YYH-081**  
Date collected **2021-06-16**

Pulse sequence **PROTON**  
Solvent **cdcl3**

Temperature **25**  
Spectrometer **Agilent-NMR-inova500**

Study owner **vnmr2**  
Operator **vnmr2**

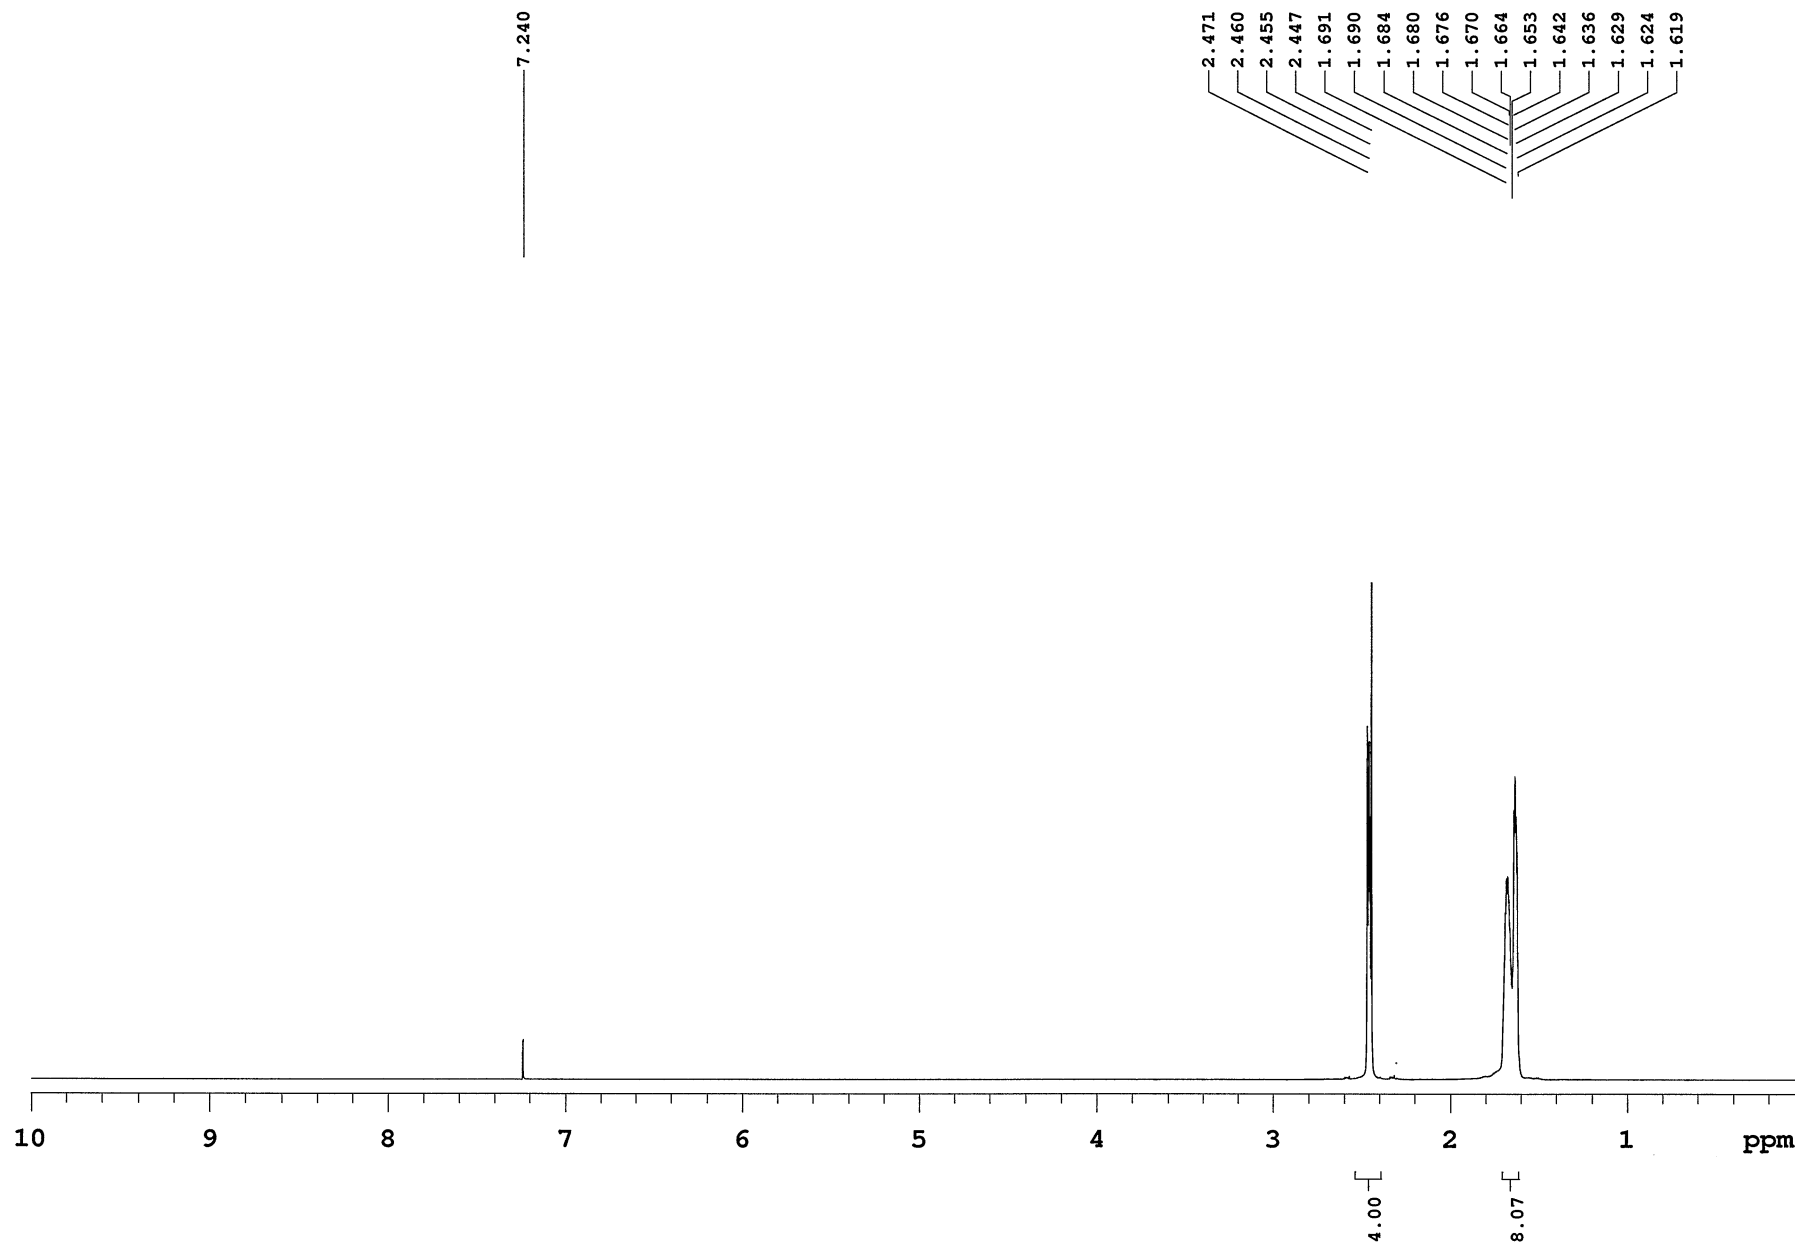

1H NMR (CDCl<sub>3</sub>, 500 MHz) of compound **4h**



Sample Name **YYH-081**  
Date collected **2021-06-16**

Pulse sequence **CARBON**  
Solvent **cdcl3**

Temperature **25**  
Spectrometer **Agilent-NMR-inova500**

Study owner **vnmr2**  
Operator **vnmr2**

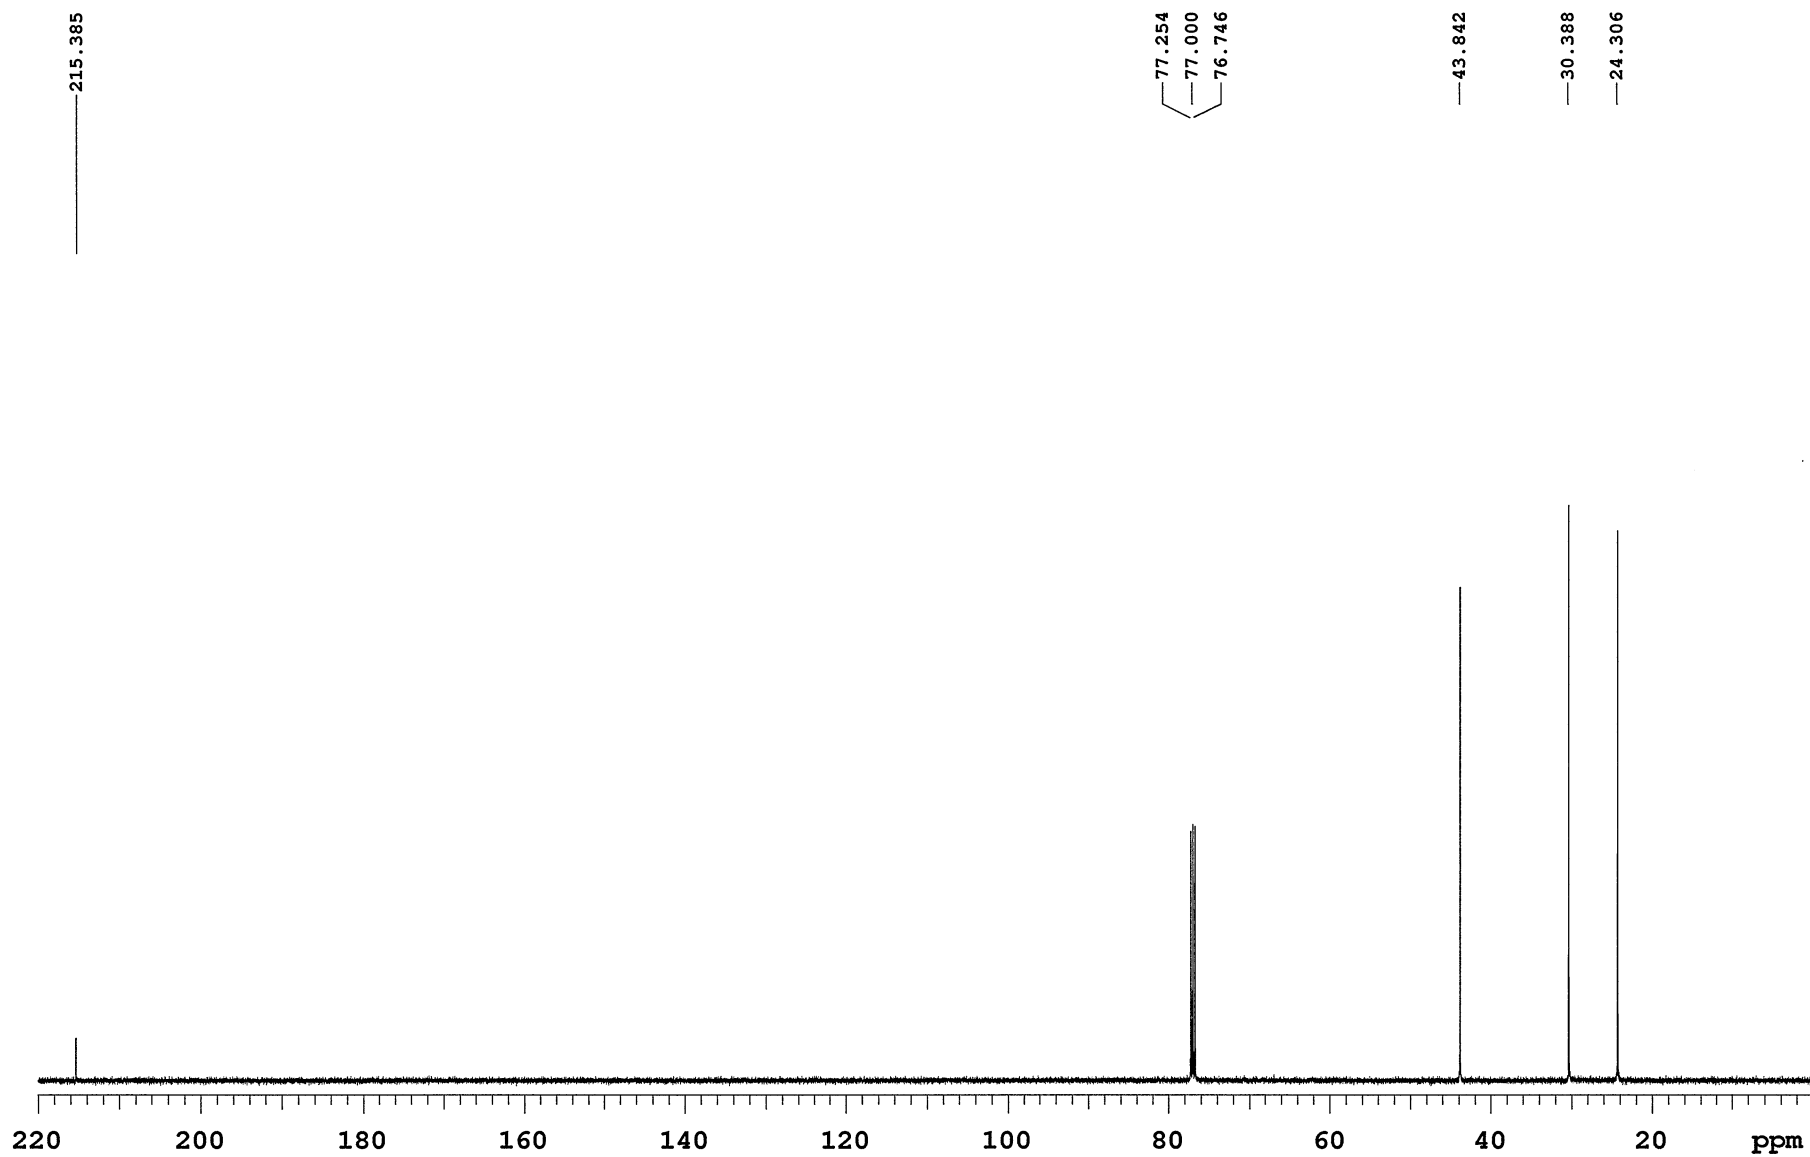

13C NMR (CDCl<sub>3</sub>, 125 MHz) of compound **4h**

Sample Name **YYH-081**  
Date collected **2021-06-16**

Pulse sequence **DEPT**  
Solvent **cdcl3**

Temperature **25**  
Spectrometer **Agilent-NMR-inova500**

Study owner **vnmr2**  
Operator **vnmr2**

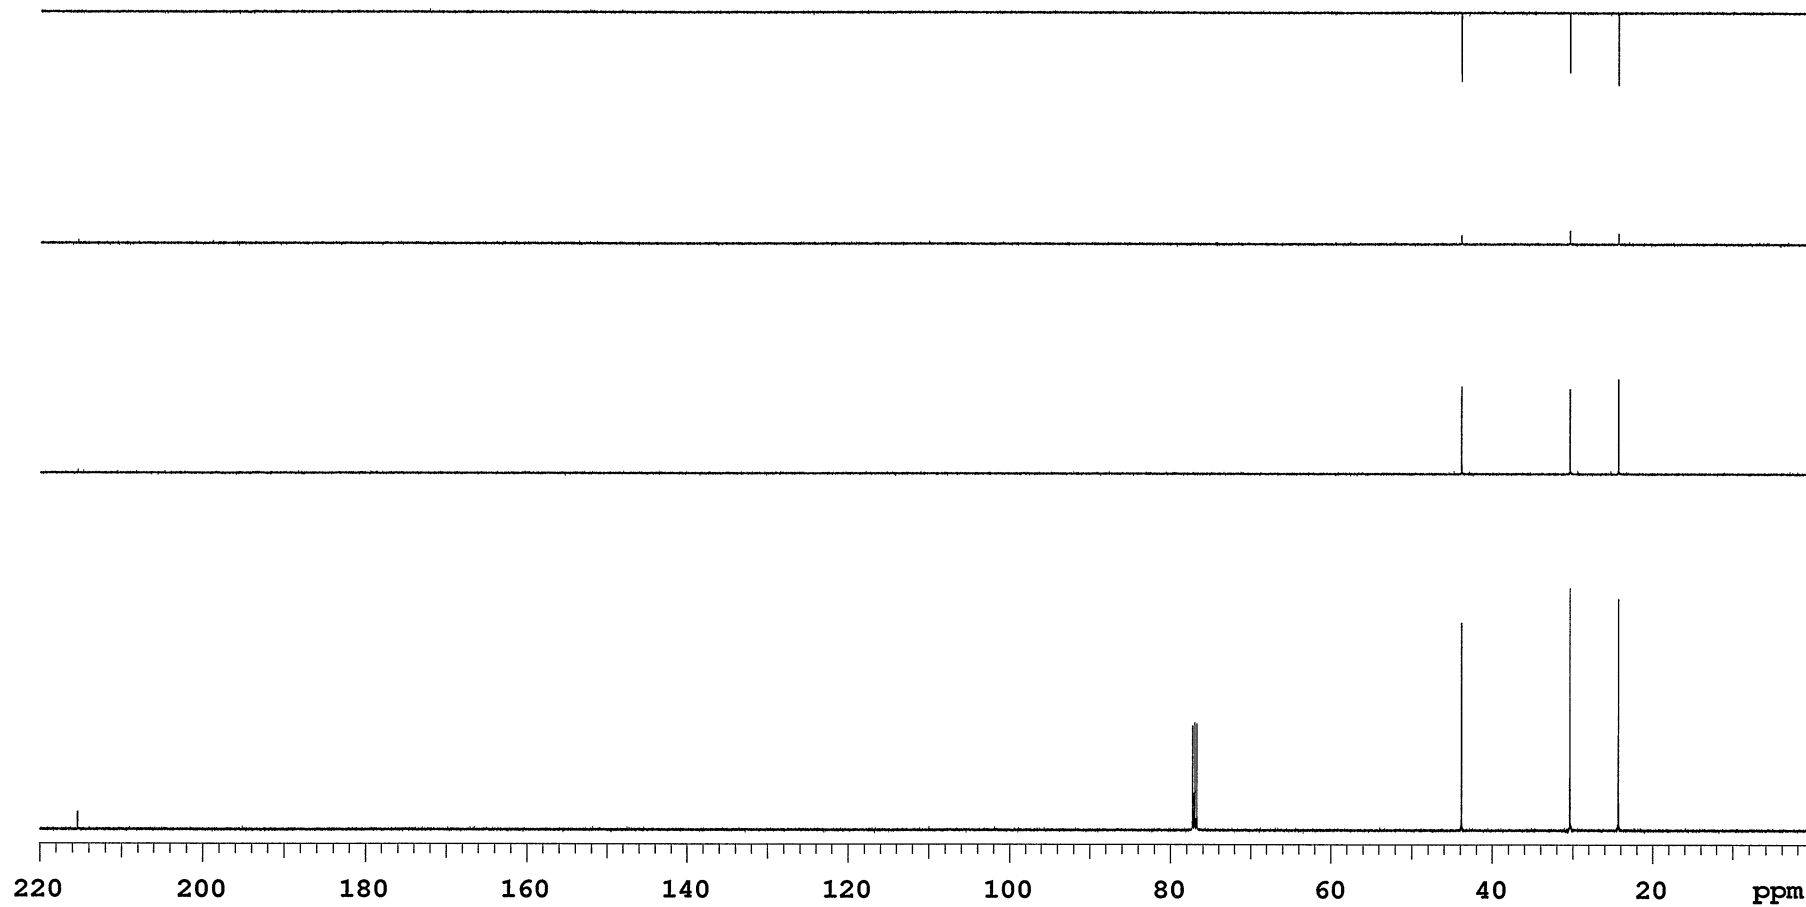

DEPT of compound 4h

Sample Name **YYH-085**  
Date collected **2021-06-09**Pulse sequence **PROTON**  
Solvent **cdcl3**Temperature **25**  
Spectrometer **Agilent-NMR-inova500**Study owner **vnmr2**  
Operator **vnmr2**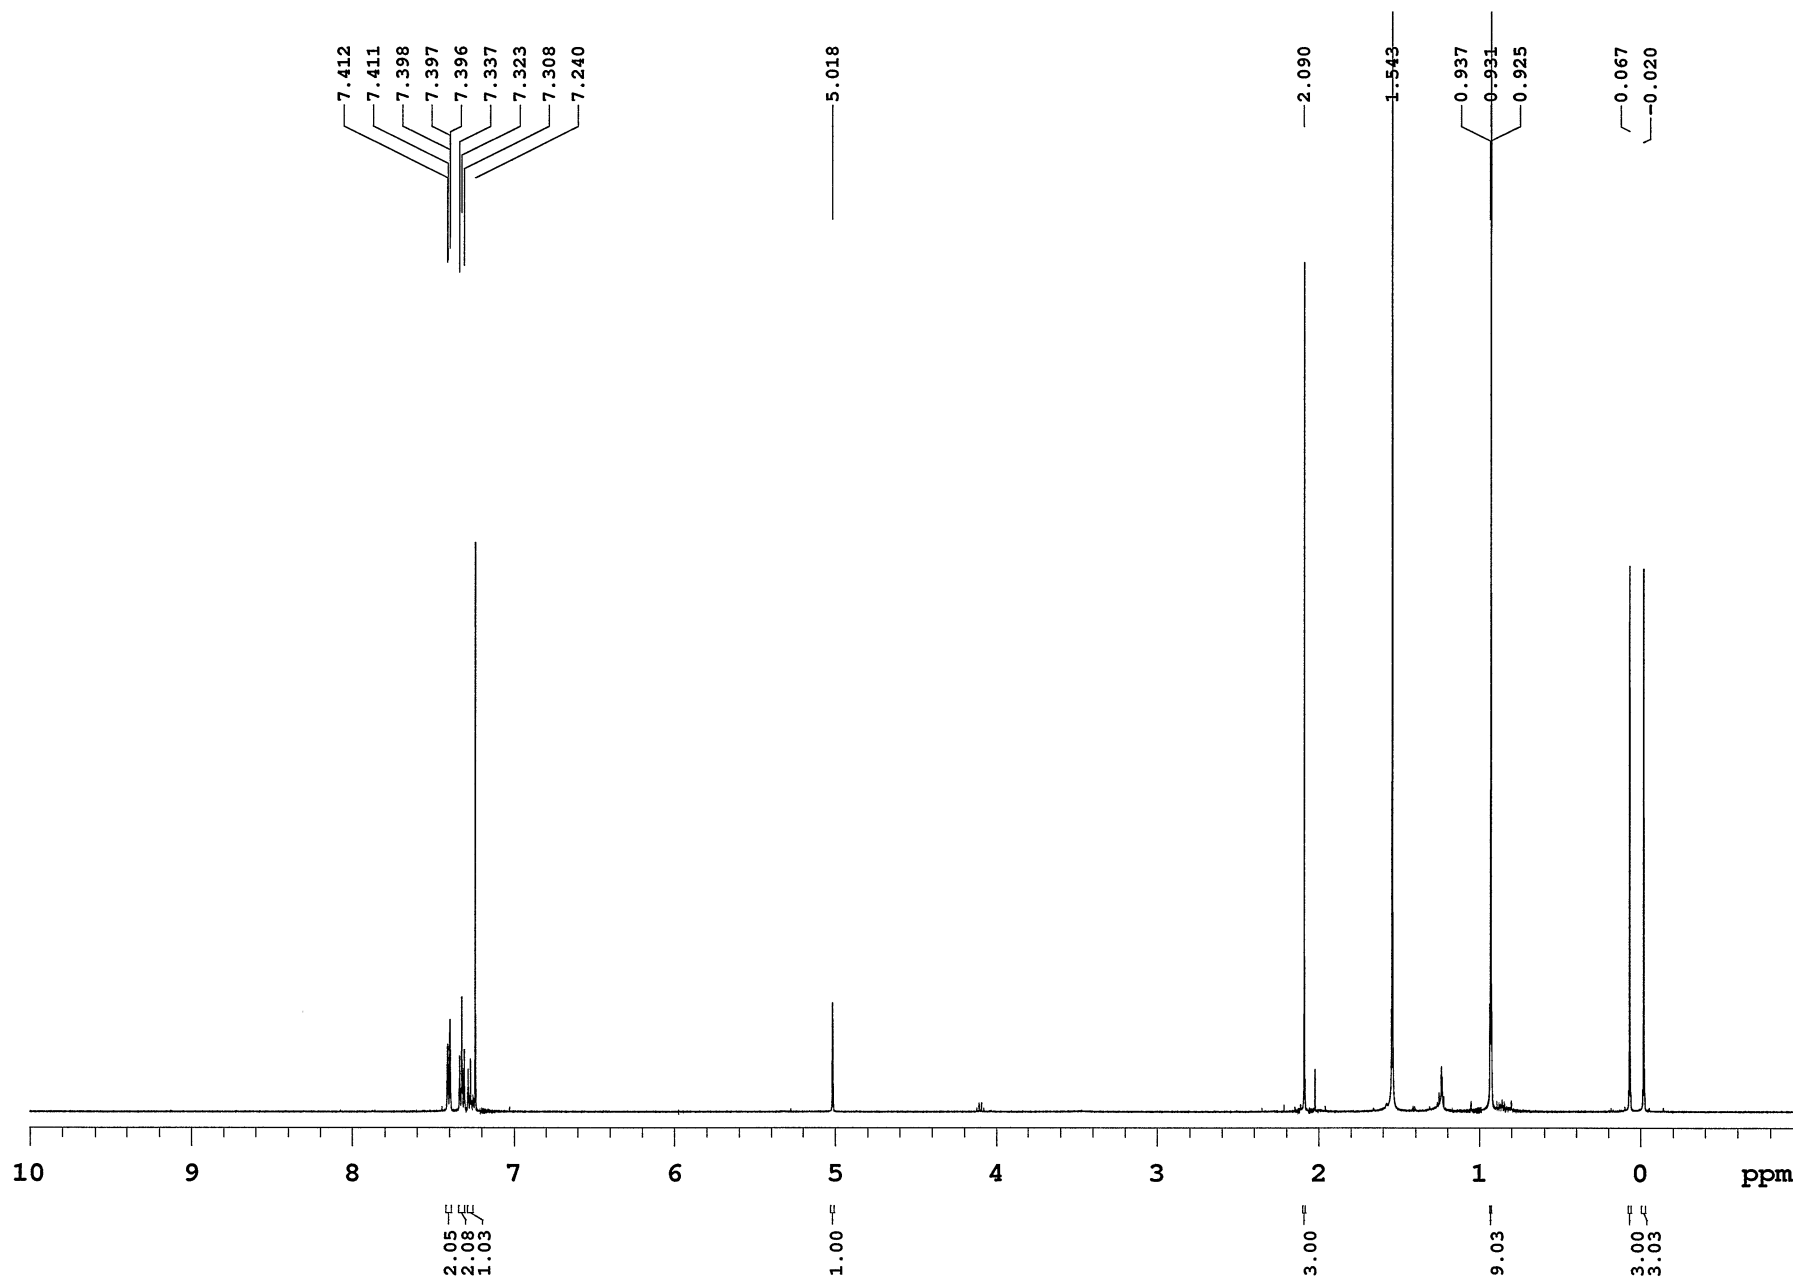

Sample Name **YYH-085**  
Date collected **2021-06-09**Pulse sequence **CARBON**  
Solvent **cdcl3**Temperature **25**  
Spectrometer **Agilent-NMR-inova500**Study owner **vnmr2**  
Operator **vnmr2**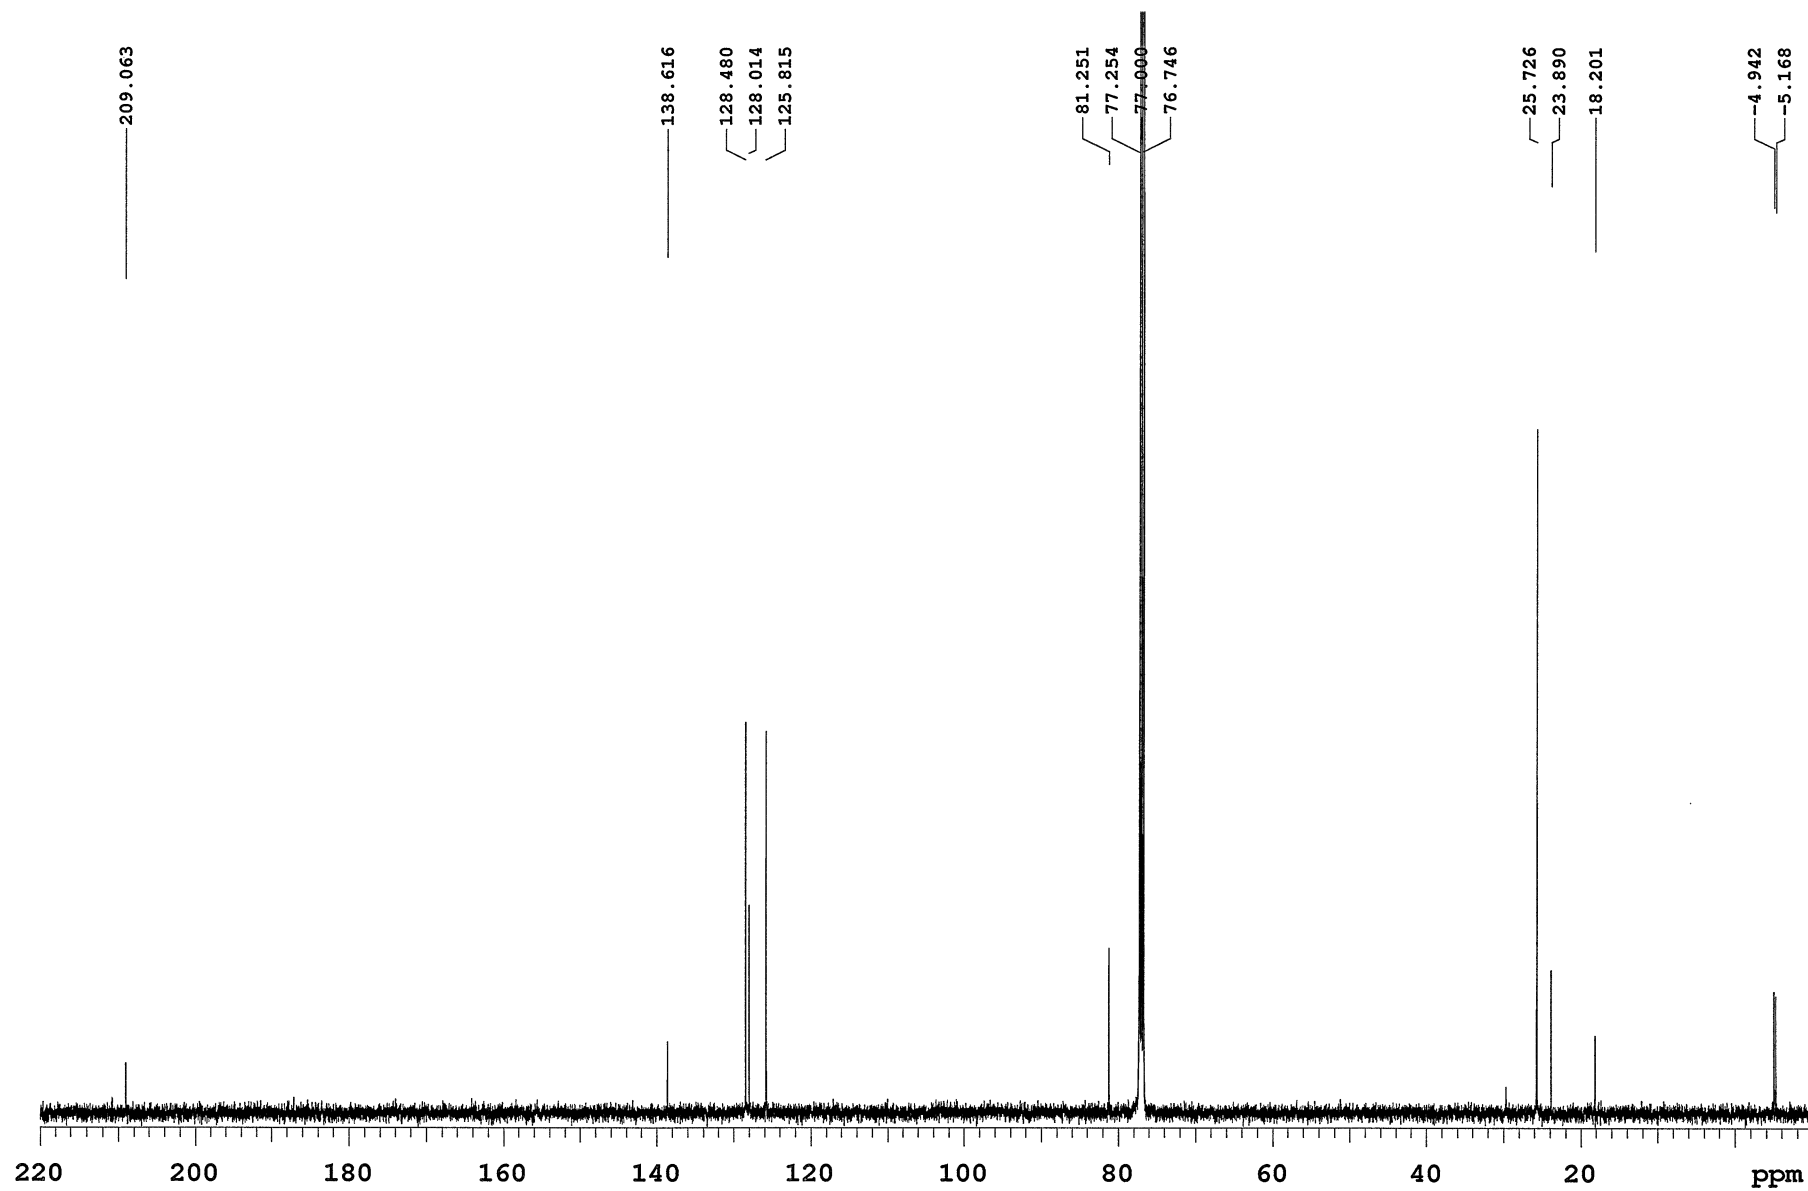13C NMR (CDCl<sub>3</sub>, 125 MHz) of compound 4i

Sample Name **YYH-085**  
Date collected **2021-06-09**

Pulse sequence **DEPT**  
Solvent **cdcl3**

Temperature **25**  
Spectrometer **Agilent-NMR-inova500**

Study owner **vnmr2**  
Operator **vnmr2**

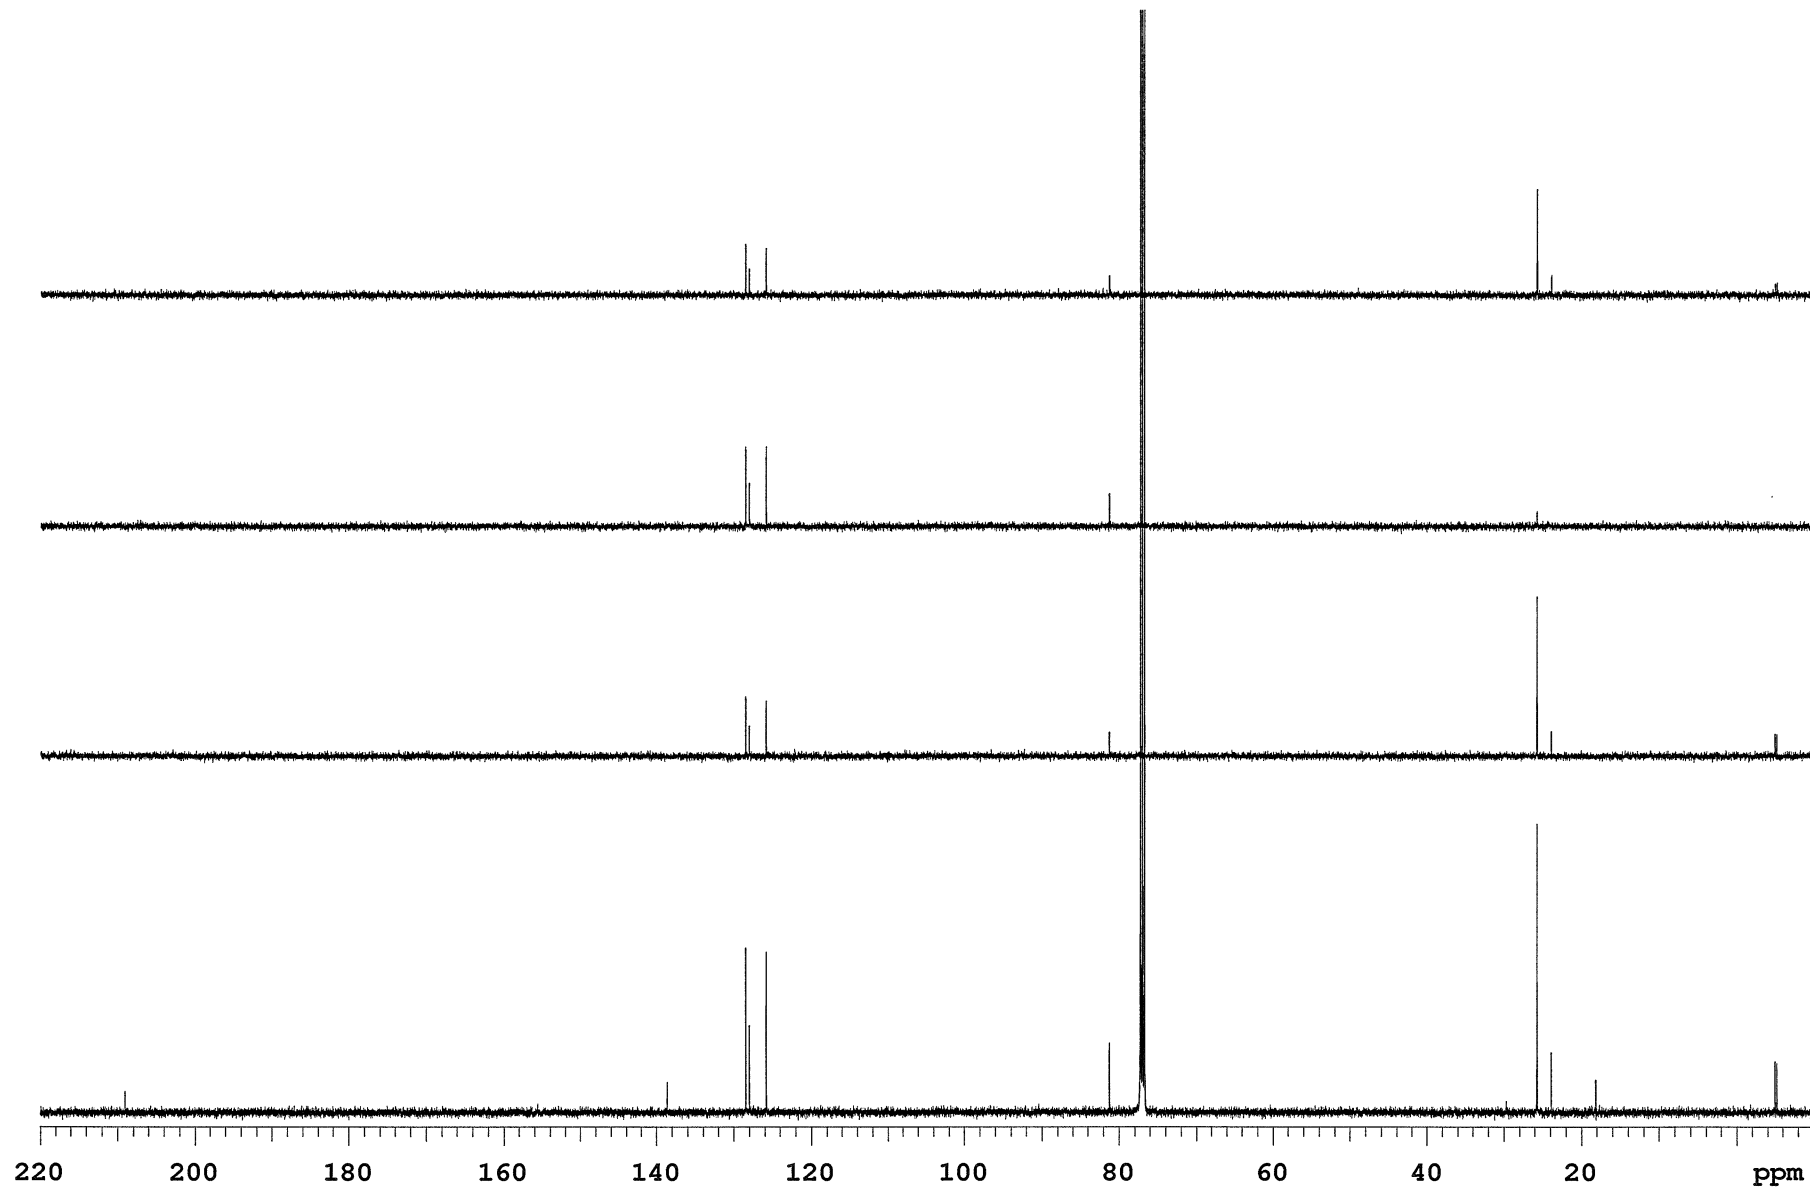

DEPT of compound 4i

Sample Name YYH-085  
Date collected 2021-06-09

Pulse sequence gHSQC  
Solvent cdcl3

Temperature 25  
Spectrometer Agilent-NMR-inova500

Study owner vnmr2  
Operator vnmr2

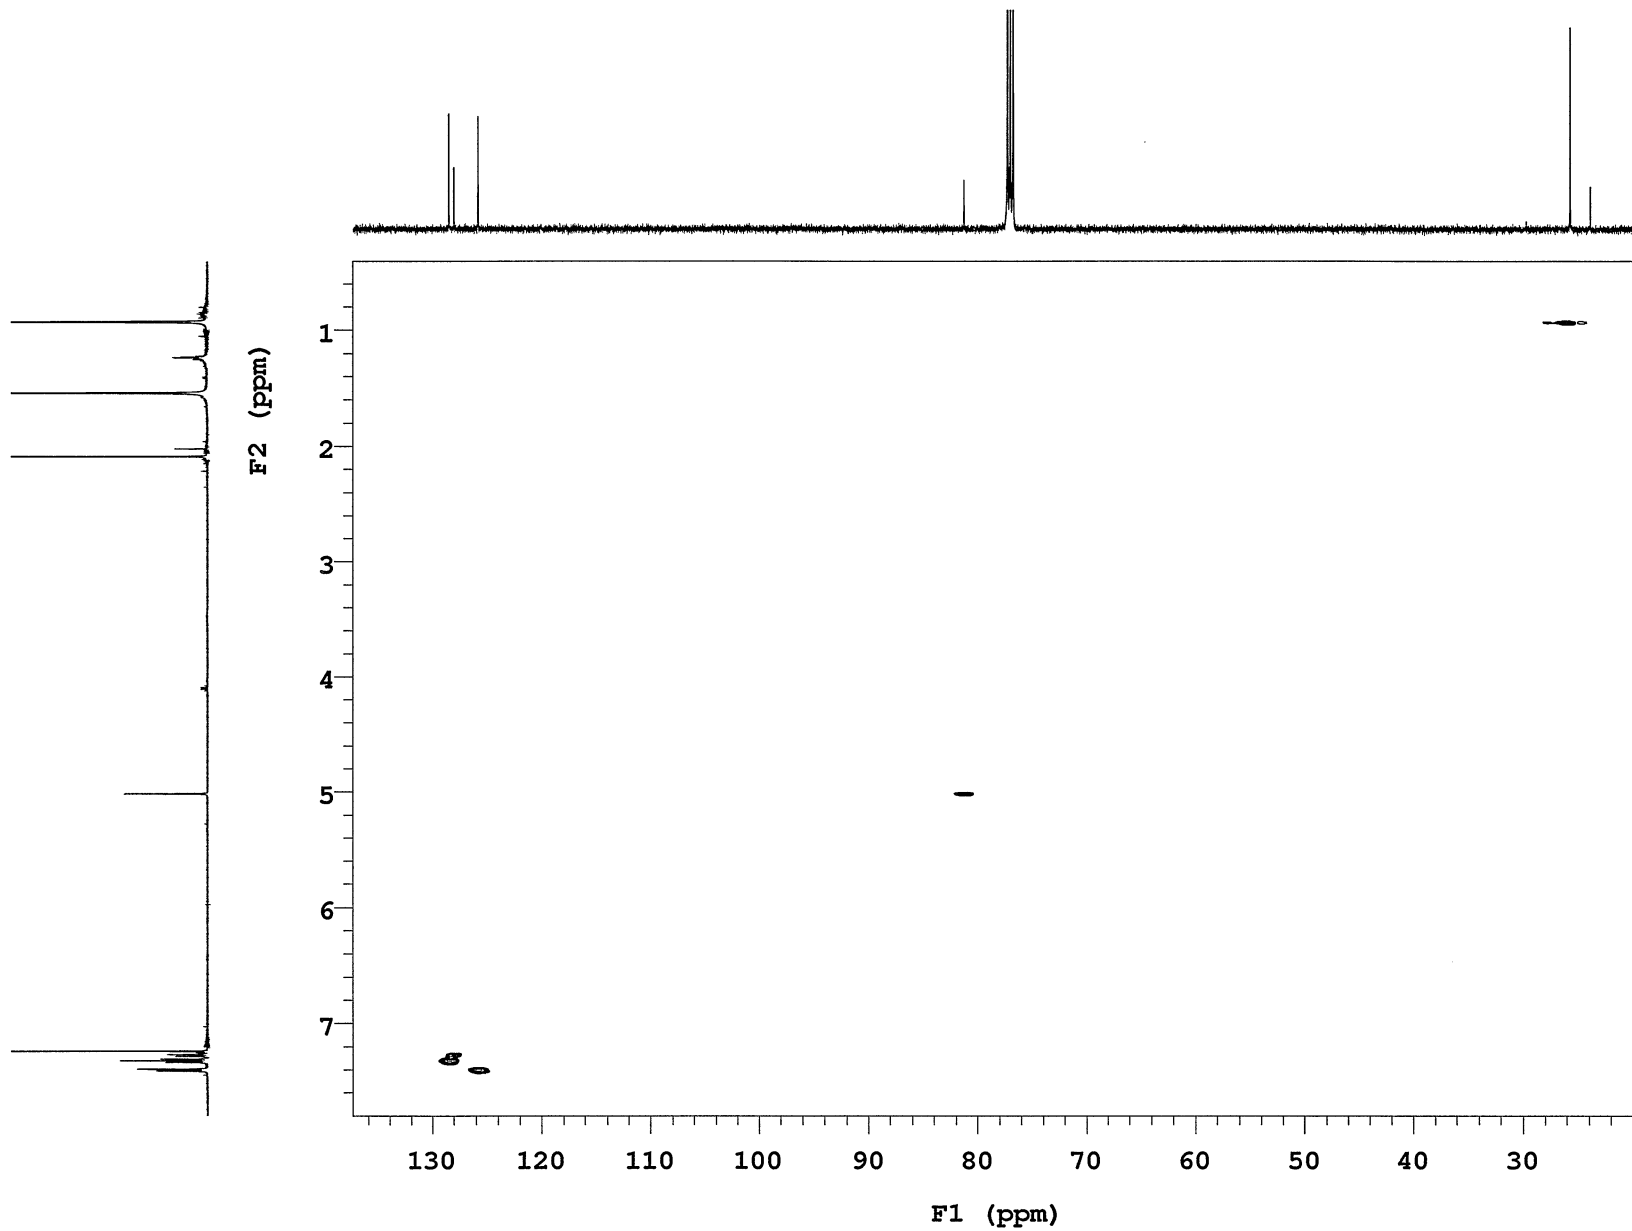

Sample Name YYH-085  
Date collected 2021-06-09

Pulse sequence gCOSY  
Solvent cdcl3

Temperature 25  
Spectrometer Agilent-NMR-inova500

Study owner vnmr2  
Operator vnmr2

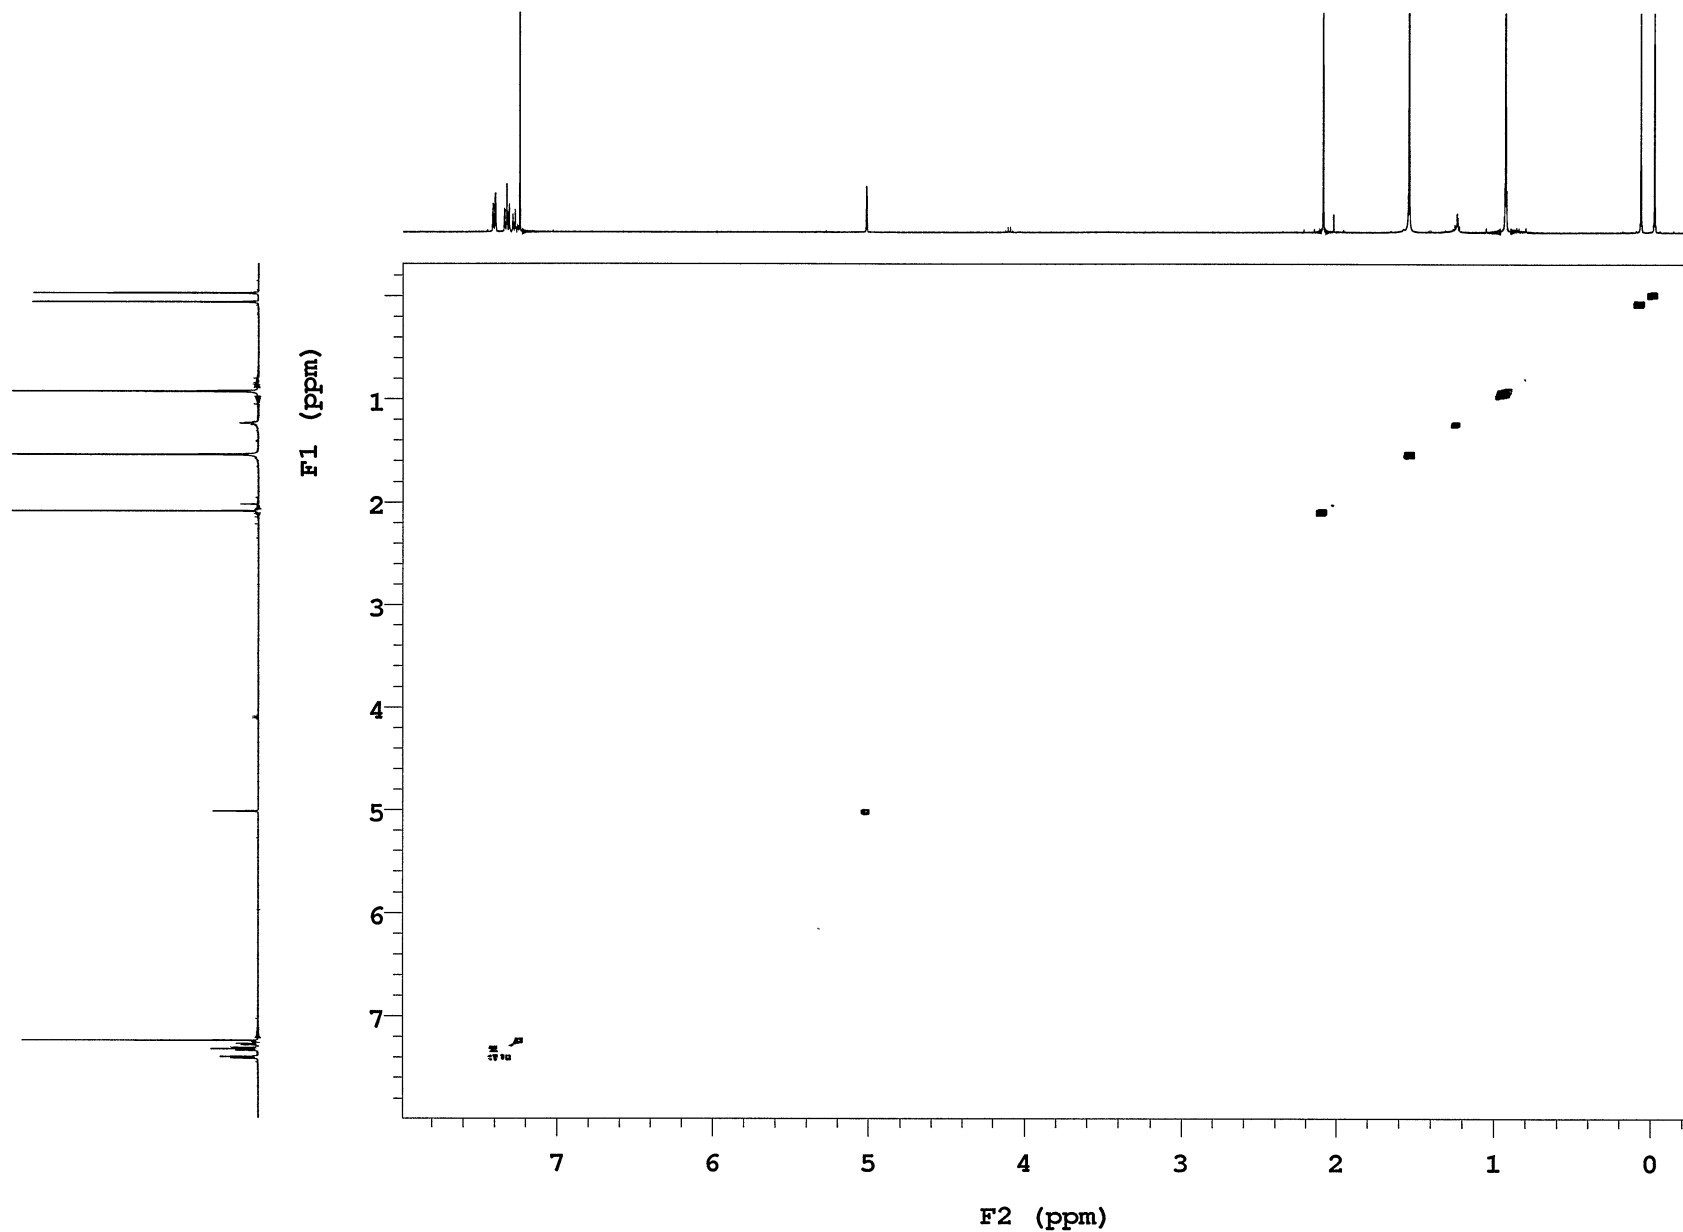

COSY of compound 4i

Sample Name **YYH-085**  
Date collected **2021-06-09**Pulse sequence **NOESY**  
Solvent **cdcl3**Temperature **25**  
Spectrometer **Agilent-NMR-inova500**Study owner **vnmr2**  
Operator **vnmr2**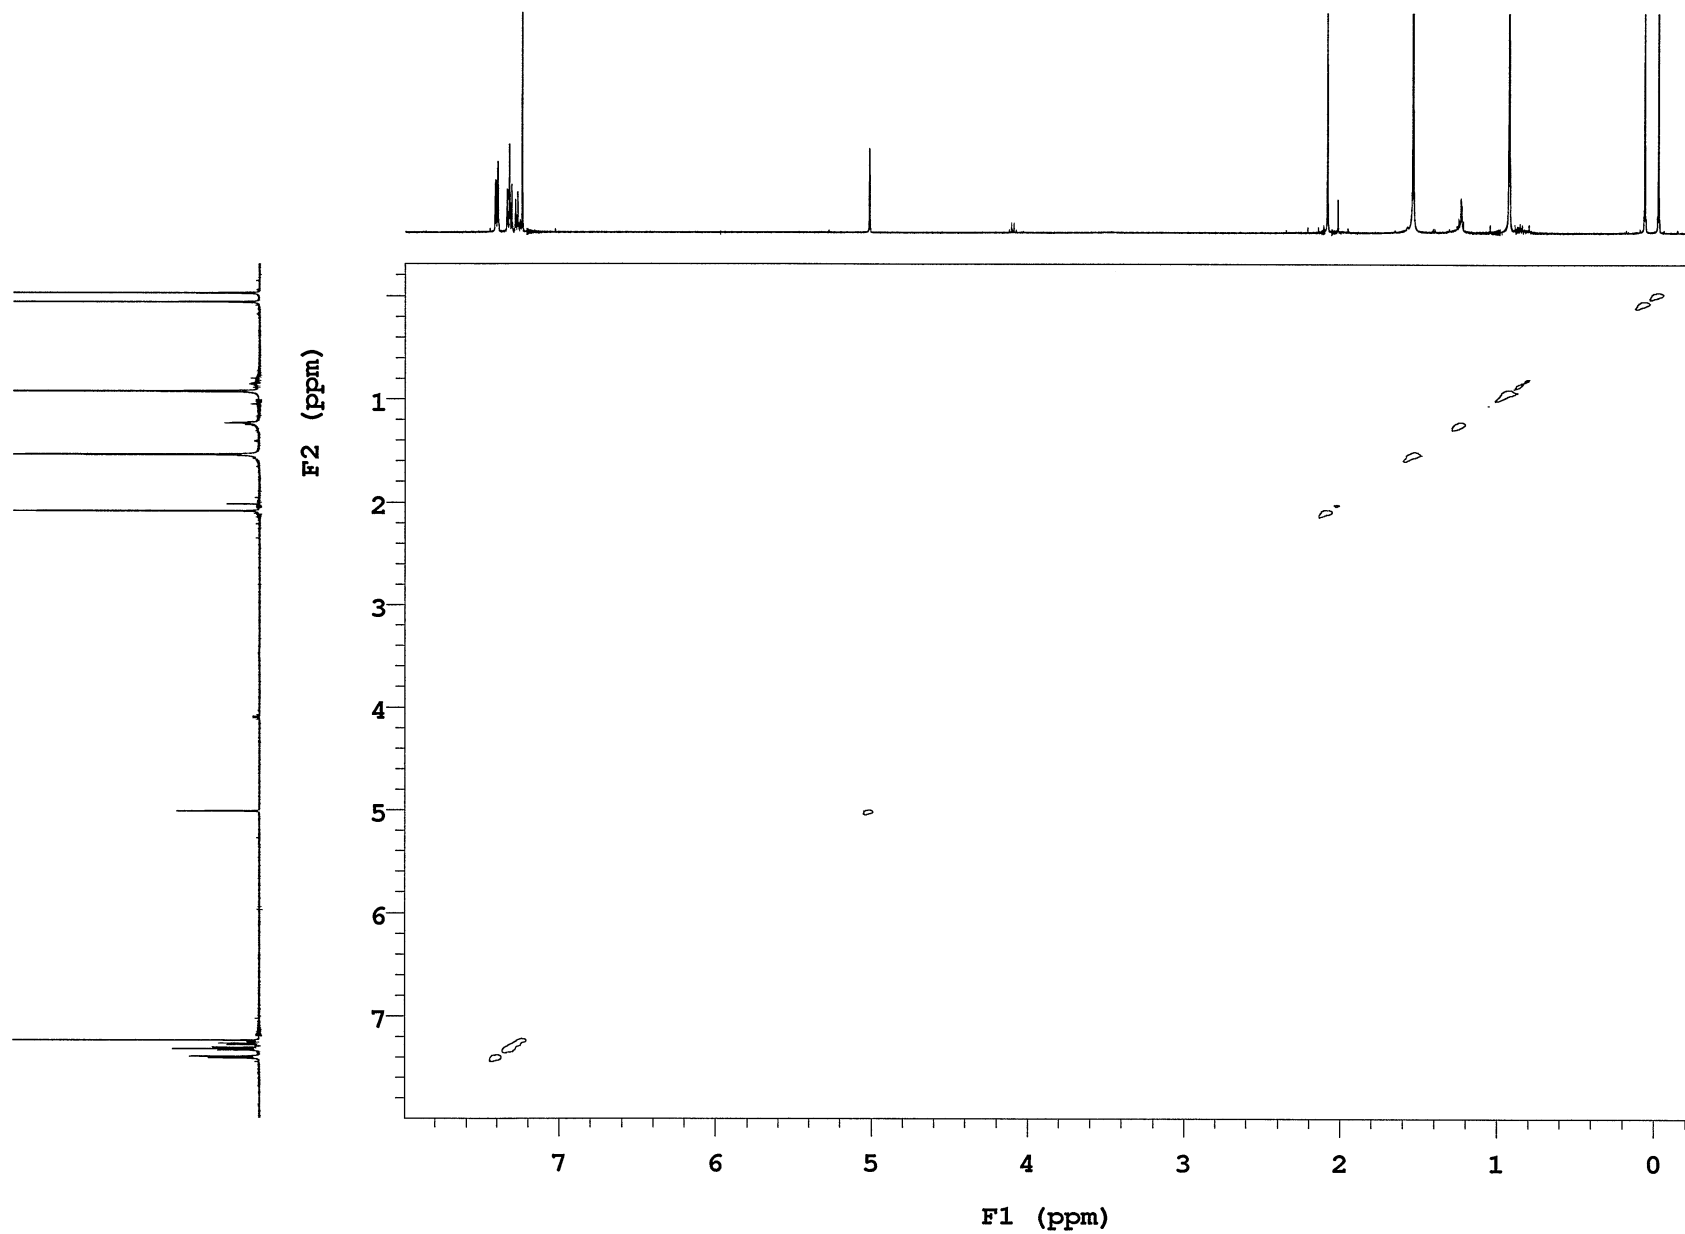NOESY of compound **4i**



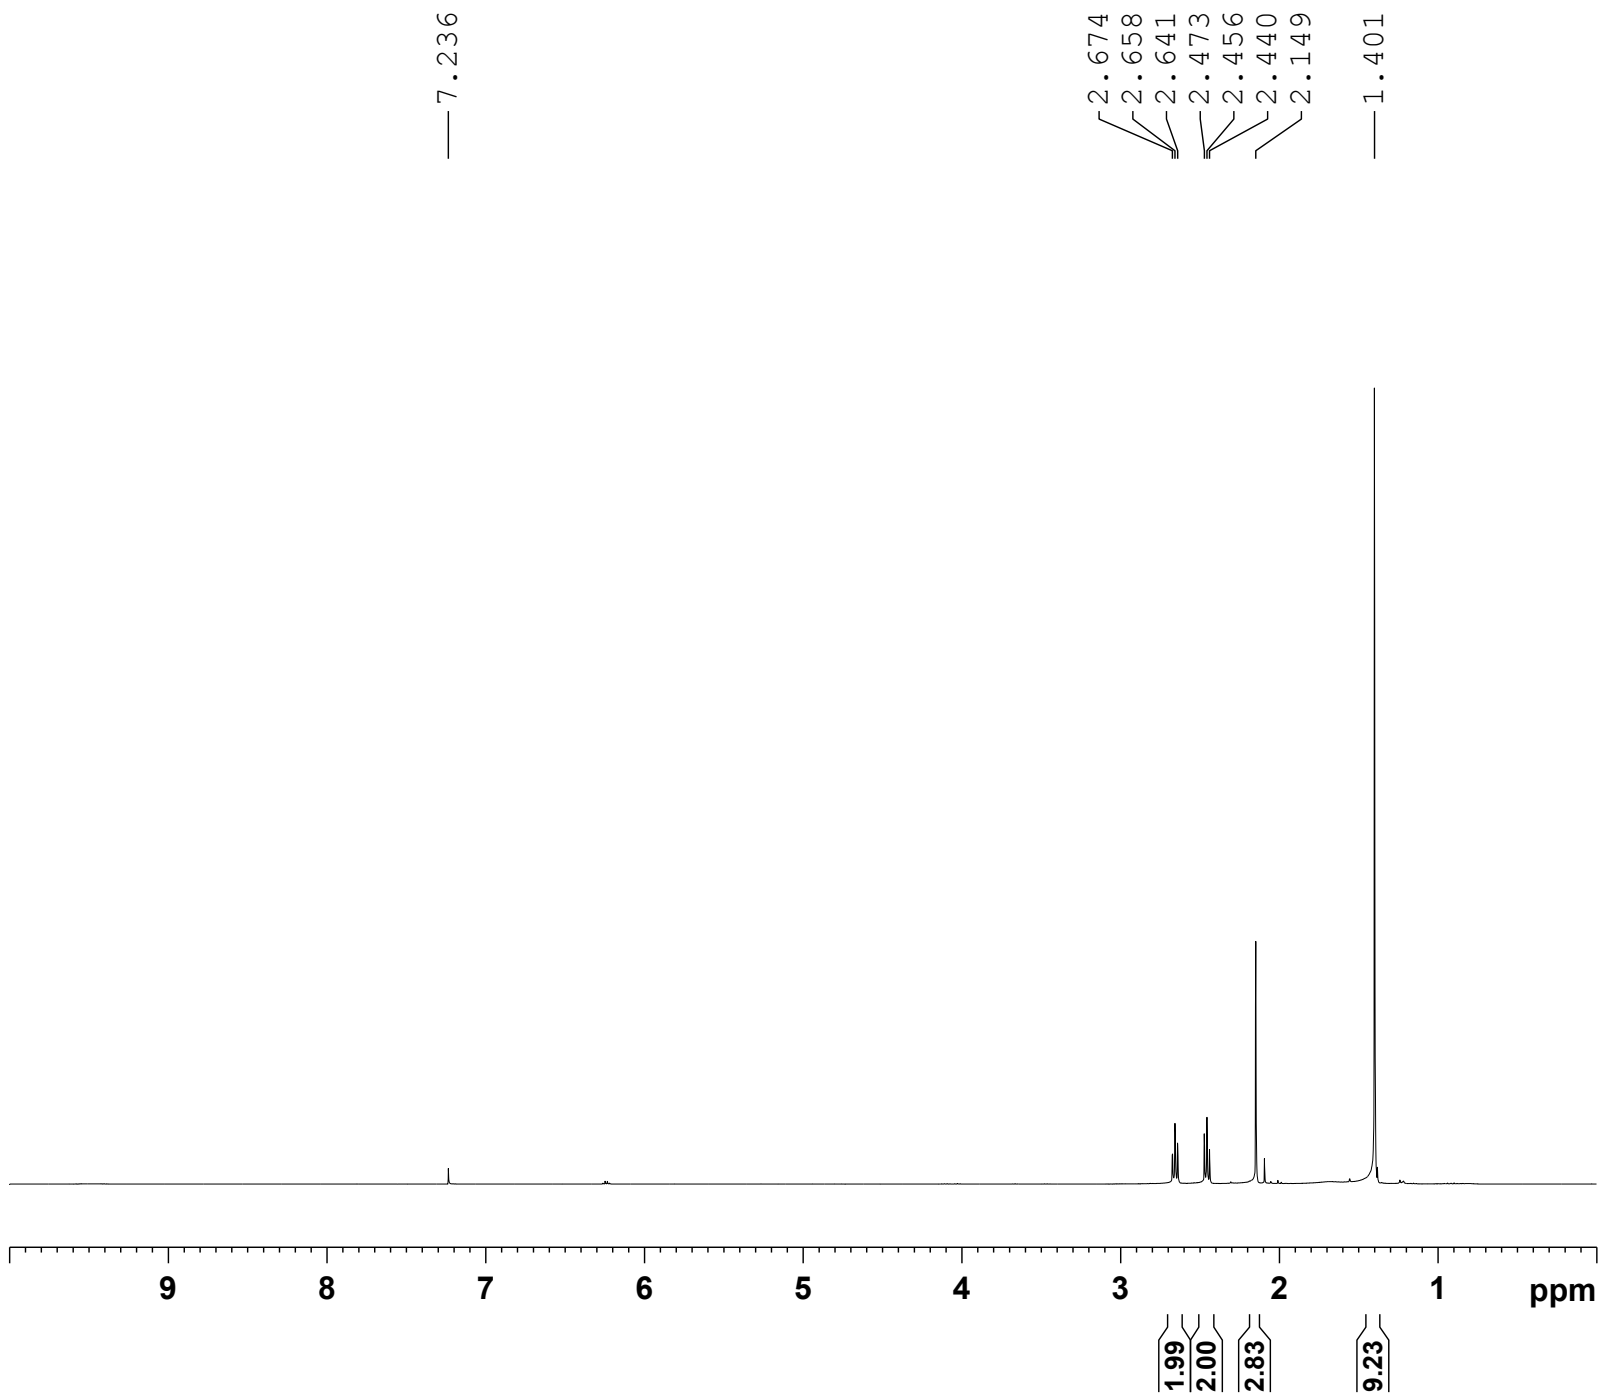

Current Data Parameters  
NAME YYH-083  
EXPNO 1  
PROCNO 1

F2 - Acquisition Parameters  
Date\_ 20210608  
Time\_ 22.22 h  
INSTRUM spect  
PROBHD Z108618\_0922 (  
PULPROG zg30  
TD 32768  
SOLVENT CDCl3  
NS 16  
DS 0  
SWH 8012.820 Hz  
FIDRES 0.489064 Hz  
AQ 2.0447233 sec  
RG 128.5  
DW 62.400 usec  
DE 16.43 usec  
TE 297.6 K  
D1 2.00000000 sec  
TD0 1  
SFO1 400.1324008 MHz  
NUC1 1H  
P1 14.50 usec  
PLW1 13.10000038 W

F2 - Processing parameters  
SI 16384  
SF 400.1300197 MHz  
WDW EM  
SSB 0  
LB 0 Hz  
GB 0  
PC 1.00

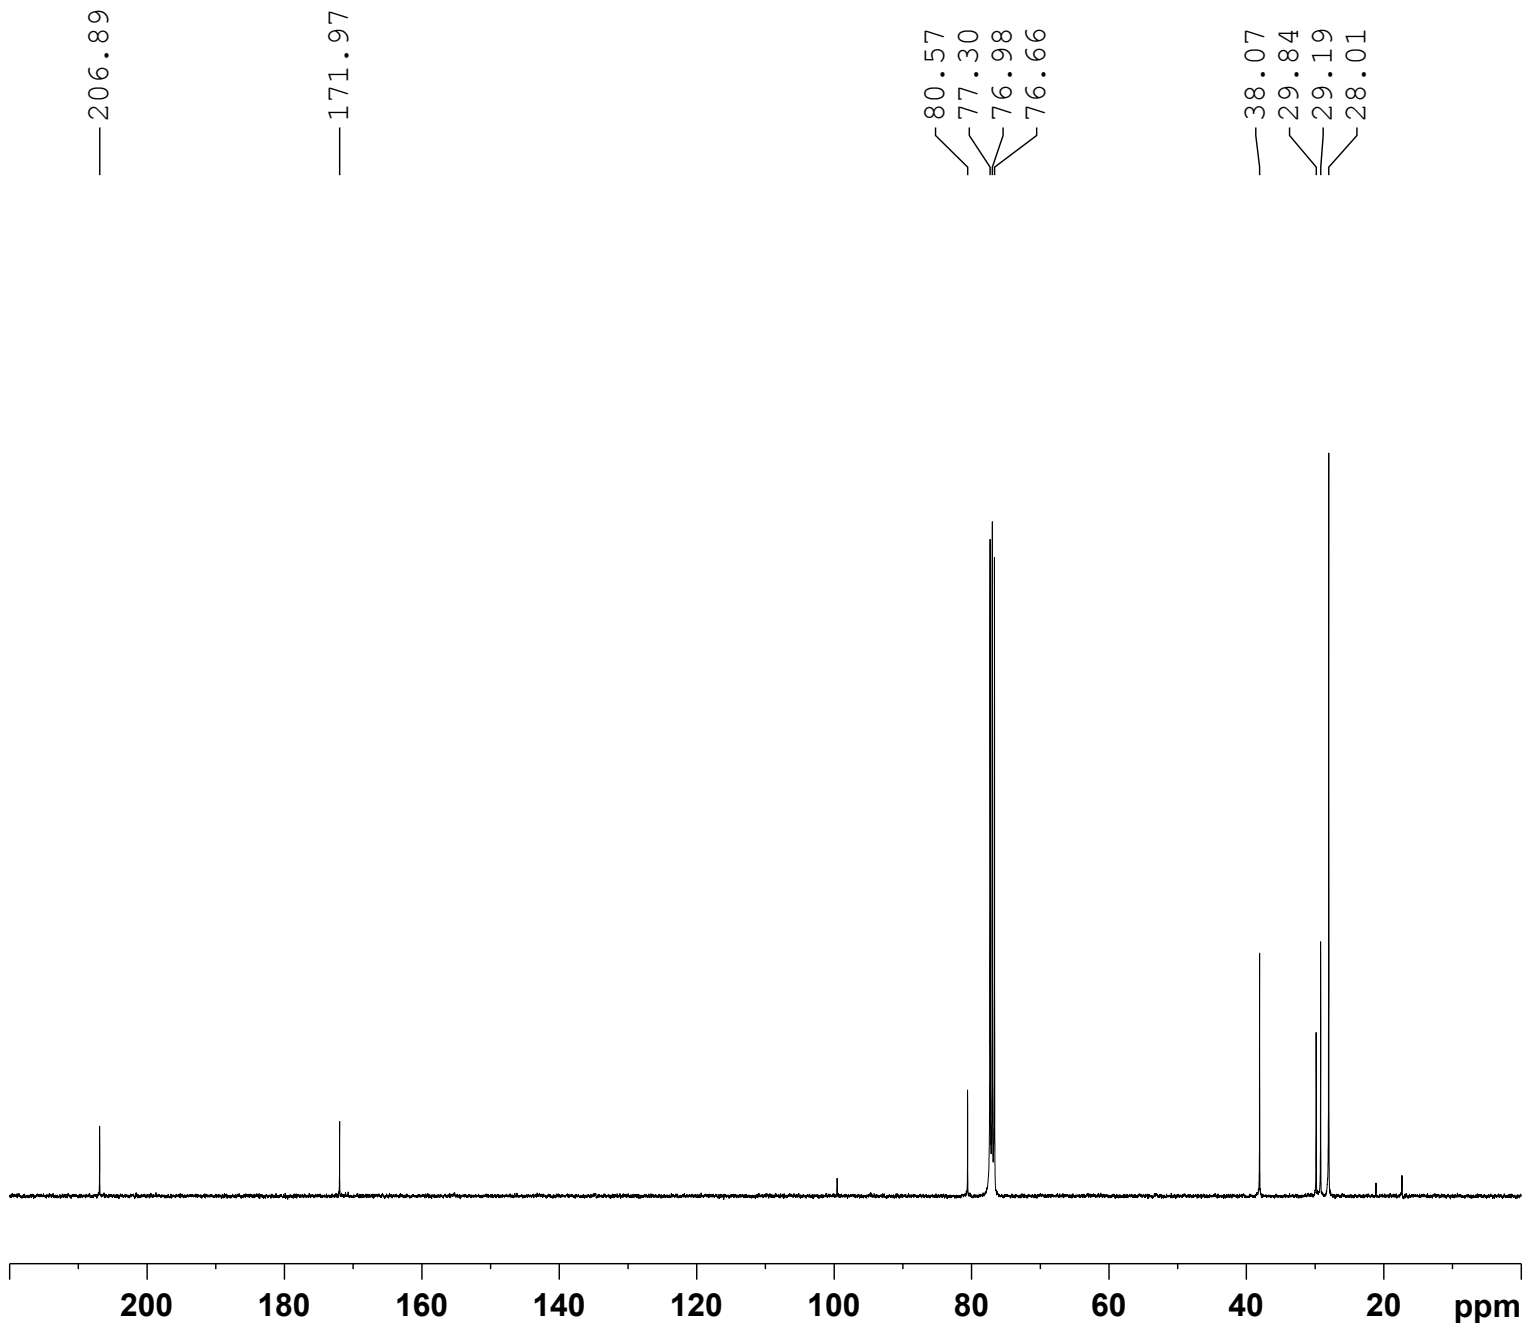

Current Data Parameters  
 NAME YYH-083  
 EXPNO 2  
 PROCNO 1

F2 - Acquisition Parameters  
 Date\_ 20210609  
 Time\_ 1.26 h  
 INSTRUM spect  
 PROBHD z108618\_0922 (  
 PULPROG zgpg30  
 TD 32768  
 SOLVENT CDCl3  
 NS 4000  
 DS 0  
 SWH 24038.461 Hz  
 FIDRES 1.467191 Hz  
 AQ 0.6815744 sec  
 RG 210.28  
 DW 20.800 usec  
 DE 6.50 usec  
 TE 298.3 K  
 D1 2.00000000 sec  
 D11 0.03000000 sec  
 TD0 1  
 SFO1 100.6233329 MHz  
 NUC1 13C  
 P1 10.50 usec  
 PLW1 44.29999924 W  
 SFO2 400.1316005 MHz  
 NUC2 1H  
 CPDPRG[2 bi\_waltz65 256  
 PCPD2 90.00 usec  
 PLW2 14.60000038 W  
 PLW12 0.37897000 W  
 PLW13 0.19032000 W

F2 - Processing parameters  
 SI 32768  
 SF 100.6127726 MHz  
 WDW EM  
 SSB 0  
 LB 2.00 Hz  
 GB 0  
 PC 1.00

DEPT of compound 4k

S119

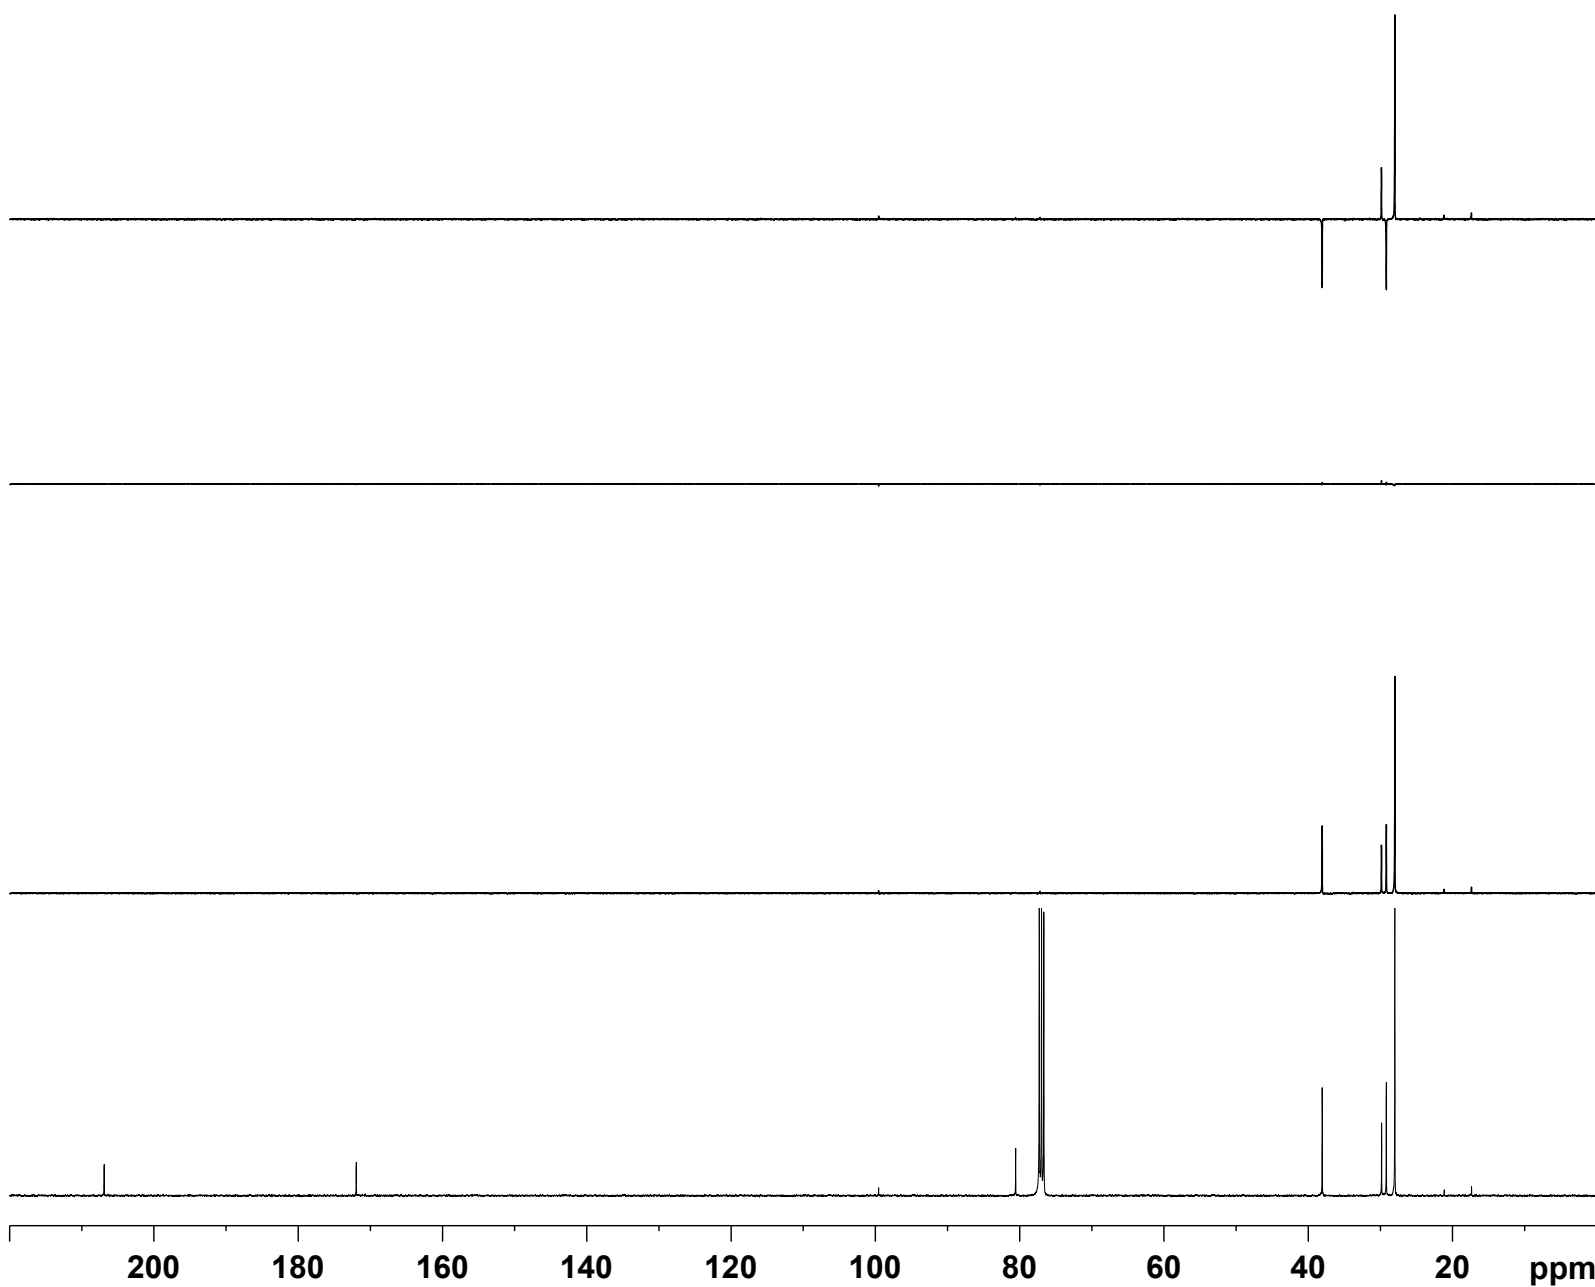

```

Current Data Parameters
NAME          YYH-083
EXPNO         2
PROCNO        1

F2 - Acquisition Parameters
Date_         20210609
Time          1.26 h
INSTRUM       spect
PROBHD        Z108618_0922 (
PULPROG       zgpg30
TD            32768
SOLVENT       CDC13
NS            4000
DS            0
SWH           24038.461 Hz
FIDRES        1.467191 Hz
AQ            0.6815744 sec
RG            210.28
DW            20.800 usec
DE            6.50 usec
TE            298.3 K
D1            2.00000000 sec
D11           0.03000000 sec
TD0           1
SFO1          100.6233329 MHz
NUC1          13C
P1            10.50 usec
PLW1          44.29999924 W
SFO2          400.1316005 MHz
NUC2          1H
CPDPRG[2     bi_waltz65_256
PCPD2         90.00 usec
PLW2          14.60000038 W
PLW12         0.37897000 W
PLW13         0.19032000 W

F2 - Processing parameters
SI            32768
SF            100.6127726 MHz
WDW           EM
SSB           0
LB            2.00 Hz
GB            0
PC            1.00
    
```

## HSQC of compound 4k

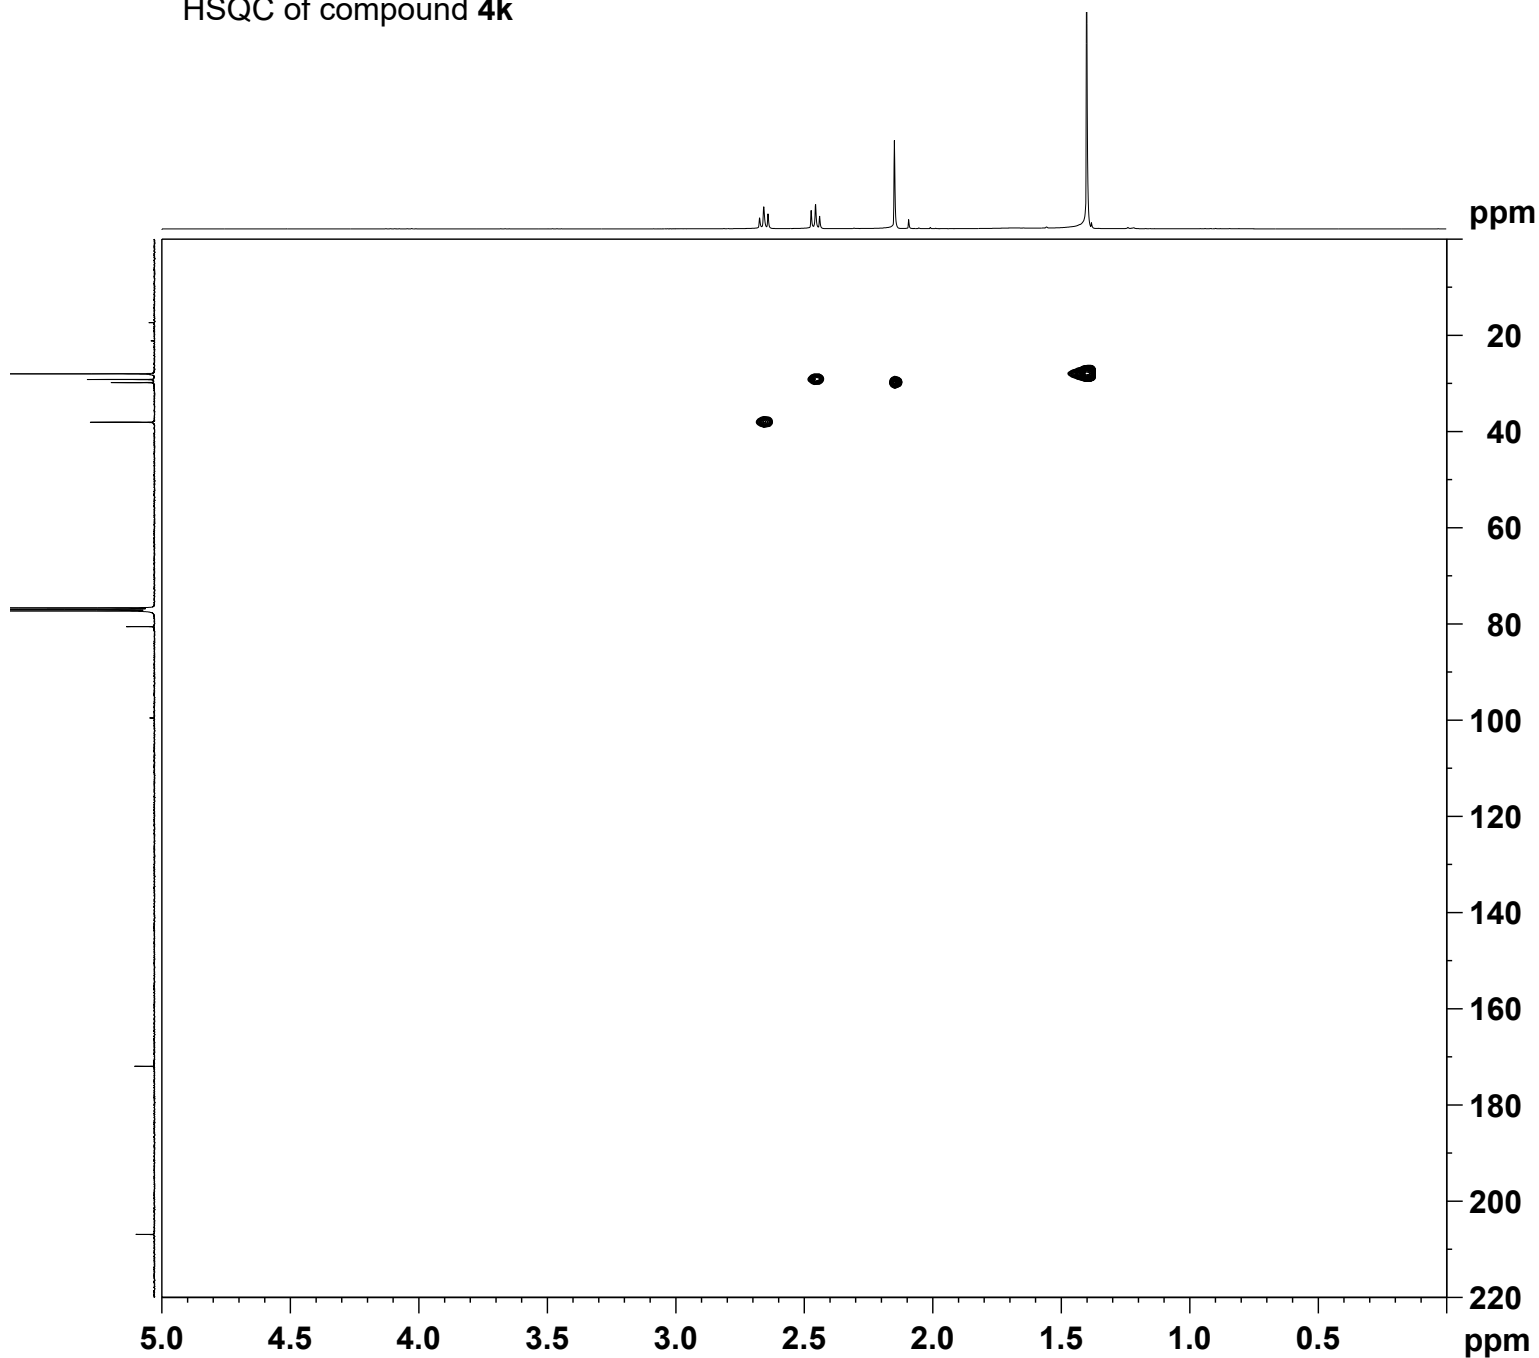

```

Current Data Parameters
NAME          YYH-083
EXPNO         6
PROCNO        1

F2 - Acquisition Parameters
Date_         20210609
Time          6.01 h
INSTRUM       spect
PROBHD        Z108618_0922 (
PULPROG       hsqcetgpsisp2.2
TD            2048
SOLVENT       CDCl3
NS            6
DS            16
SWH           8012.820 Hz
FIDRES        7.825020 Hz
AQ            0.1277952 sec
RG            210.28
DW            62.400 usec
DE            6.50 usec
TE            298.3 K
CNST2         145.0000000
CNST17        -0.5000000
D0            0.00000300 sec
D1            1.50000000 sec
D4            0.00172414 sec
D11           0.03000000 sec
D16           0.00020000 sec
D24           0.00086207 sec
IN0           0.00002080 sec
TDav          1
SFO1          400.1324008 MHz
NUC1          1H
P1            14.50 usec
P2            29.00 usec
P28           1000.00 usec
PLW1          13.10000038 W
SFO2          100.6233329 MHz
NUC2          13C
CPDPRG[2]    garp
P3            10.50 usec
P14           500.00 usec
P24           2000.00 usec
PCPD2         80.00 usec
PLW0          0 W
PLW2          44.00000000 W
PLW12         0.75796998 W
SPNAM[3]      Crp60,0.5,20.1
SFOAL3        0.500
SPOFFS3       0 Hz
SPW3          7.41179991 W
SPNAM[7]      Crp60comp.4
SFOAL7        0.500
SPOFFS7       0 Hz
SPW7          7.41179991 W
GPNAM[1]      SMSQ10.100
GPZ1          80.00 %
GPNAM[2]      SMSQ10.100
GPZ2          20.10 %
GPNAM[3]      SMSQ10.100
GPZ3          11.00 %
GPNAM[4]      SMSQ10.100
GPZ4          -5.00 %
P16           1000.00 usec
P19           600.00 usec

F1 - Acquisition parameters
TD            256
SFO1          100.6233 MHz
FIDRES        187.800476 Hz
SW            238.896 ppm
FnMODE        Echo-Antiecho

F2 - Processing parameters
SI            1024
SF            400.1300197 MHz
WDW           QSINE
SSB           2
LB            0 Hz
GB            0
PC            1.40

F1 - Processing parameters
SI            1024
MC2           echo-antiecho
SF            100.6127726 MHz
WDW           QSINE
SSB           2
LB            0 Hz
GB            0

```

COSY of compound 4k

S121

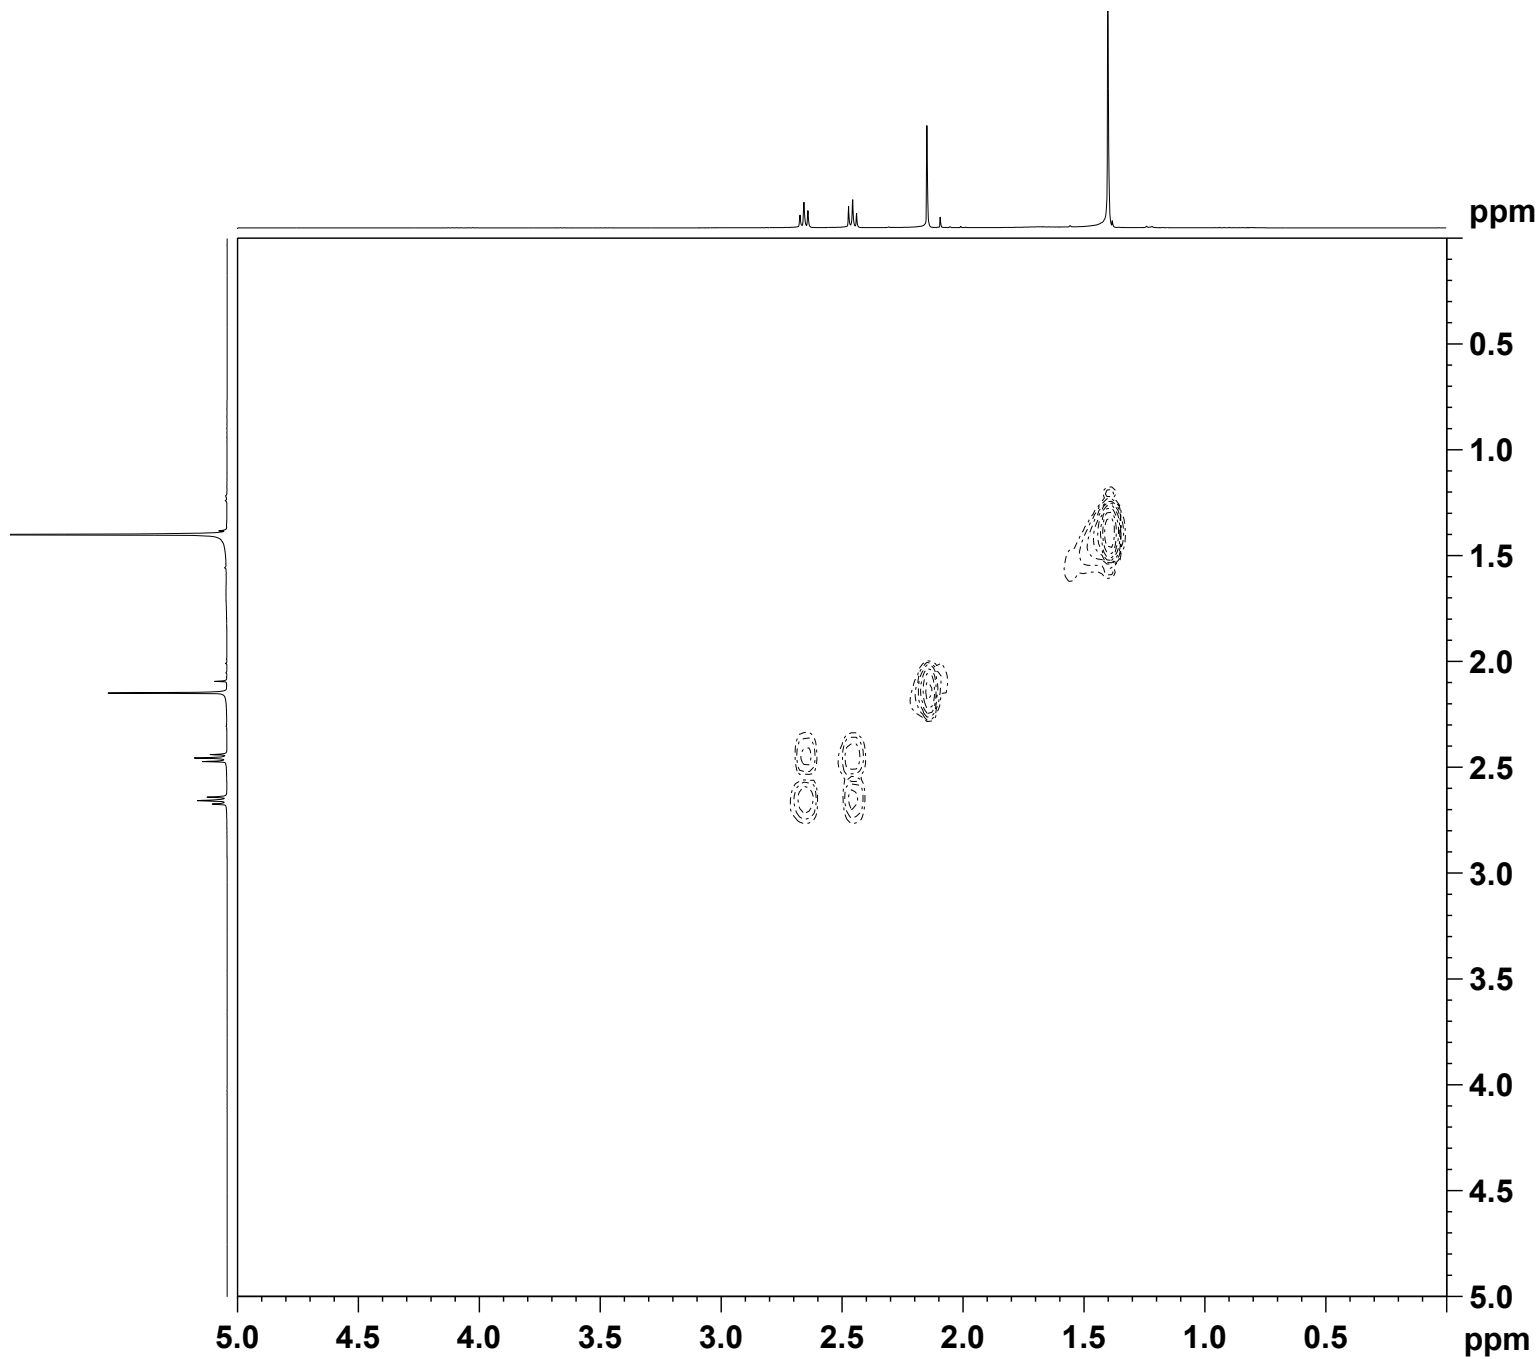

```

Current Data Parameters
NAME          YYH-083
EXPNO         7
PROCNO        1

F2 - Acquisition Parameters
Date_         20210609
Time          6.44 h
INSTRUM       spect
PROBHD        Z108618_0922 (
PULPROG       cosygppppqf
TD            2048
SOLVENT       CDCl3
NS            6
DS            16
SWH           8012.820 Hz
FIDRES        7.825020 Hz
AQ            0.1277952 sec
RG            63.35
DW            62.400 usec
DE            6.50 usec
TE            298.3 K
D0            0.00000300 sec
D1            2.00000000 sec
D11           0.03000000 sec
D12           0.00002000 sec
D13           0.00000400 sec
D16           0.00020000 sec
IN0           0.00012480 sec
TDav          1
SFO1          400.1324008 MHz
NUC1          1H
P0            14.50 usec
P1            14.50 usec
P17           2500.00 usec
PLW1          13.10000038 W
PLW10         3.06030011 W
GPNAM[1]      SMSQ10.100
GPZ1          10.00 %
P16           1000.00 usec

F1 - Acquisition parameters
TD            256
SFO1          400.1324 MHz
FIDRES        62.600159 Hz
SW            20.025 ppm
FnMODE        QF

F2 - Processing parameters
SI            1024
SF            400.1300197 MHz
WDW           QSINE
SSB           0
LB            0 Hz
GB            0
PC            1.40

F1 - Processing parameters
SI            1024
MC2           QF
SF            400.1300197 MHz
WDW           QSINE
SSB           0
LB            0 Hz
GB            0
    
```

## NOESY of compound 4k

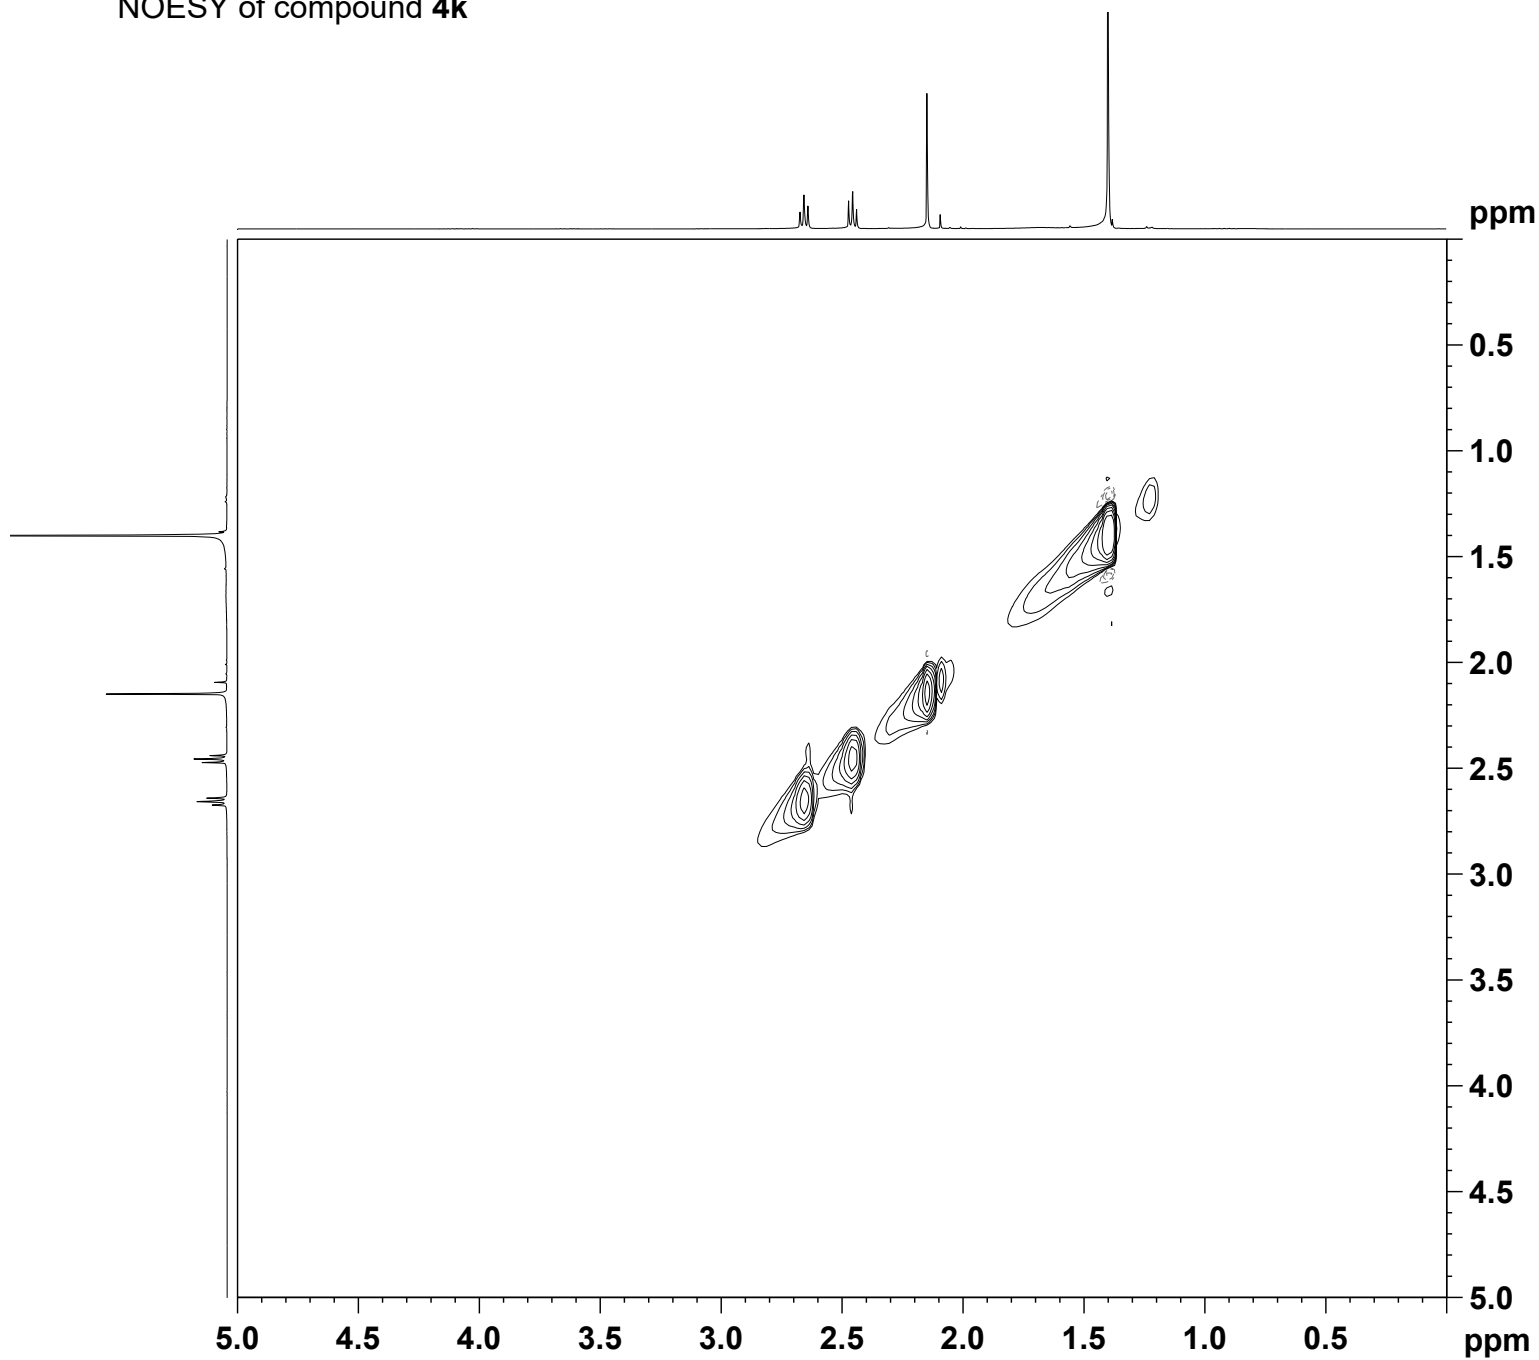

Current Data Parameters  
 NAME YYH-083  
 EXPNO 8  
 PROCNO 1

F2 - Acquisition Parameters  
 Date 20210609  
 Time 7.41 h  
 INSTRUM spect  
 PROBHD Z108618\_0922 (  
 PULPROG noesygpphpp  
 TD 2048  
 SOLVENT CDCl3  
 NS 6  
 DS 16  
 SWH 8012.820 Hz  
 FIDRES 7.825020 Hz  
 AQ 0.1277952 sec  
 RG 112.98  
 DW 62.400 usec  
 DE 6.50 usec  
 TE 297.7 K  
 D0 0.00004394 sec  
 D1 2.00000000 sec  
 D8 0.40000001 sec  
 D11 0.03000000 sec  
 D12 0.00002000 sec  
 D16 0.00020000 sec  
 IN0 0.00012480 sec  
 T Dav 1  
 SFO1 400.1324008 MHz  
 NUC1 1H  
 P1 14.50 usec  
 P2 29.00 usec  
 P17 2500.00 usec  
 PLW1 13.10000038 W  
 PLW10 3.06030011 W  
 GPNAM[1] SMSQ10.100  
 GPZ1 40.00 %  
 P16 1000.00 usec

F1 - Acquisition parameters  
 TD 256  
 SFO1 400.1324 MHz  
 FIDRES 62.600159 Hz  
 SW 20.025 ppm  
 FnMODE States-TPPI

F2 - Processing parameters  
 SI 1024  
 SF 400.1300197 MHz  
 WDW QSINE  
 SSB 2  
 LB 0 Hz  
 GB 0  
 PC 1.40

F1 - Processing parameters  
 SI 1024  
 MC2 States-TPPI  
 SF 400.1300197 MHz  
 WDW QSINE  
 SSB 2  
 LB 0 Hz  
 GB 0

Sample Name **YYH-082**  
Date collected **2021-06-10**

Pulse sequence **PROTON**  
Solvent **cdcl3**

Temperature **25**  
Spectrometer **Agilent-NMR-inova500**

Study owner **vnmr2**  
Operator **vnmr2**

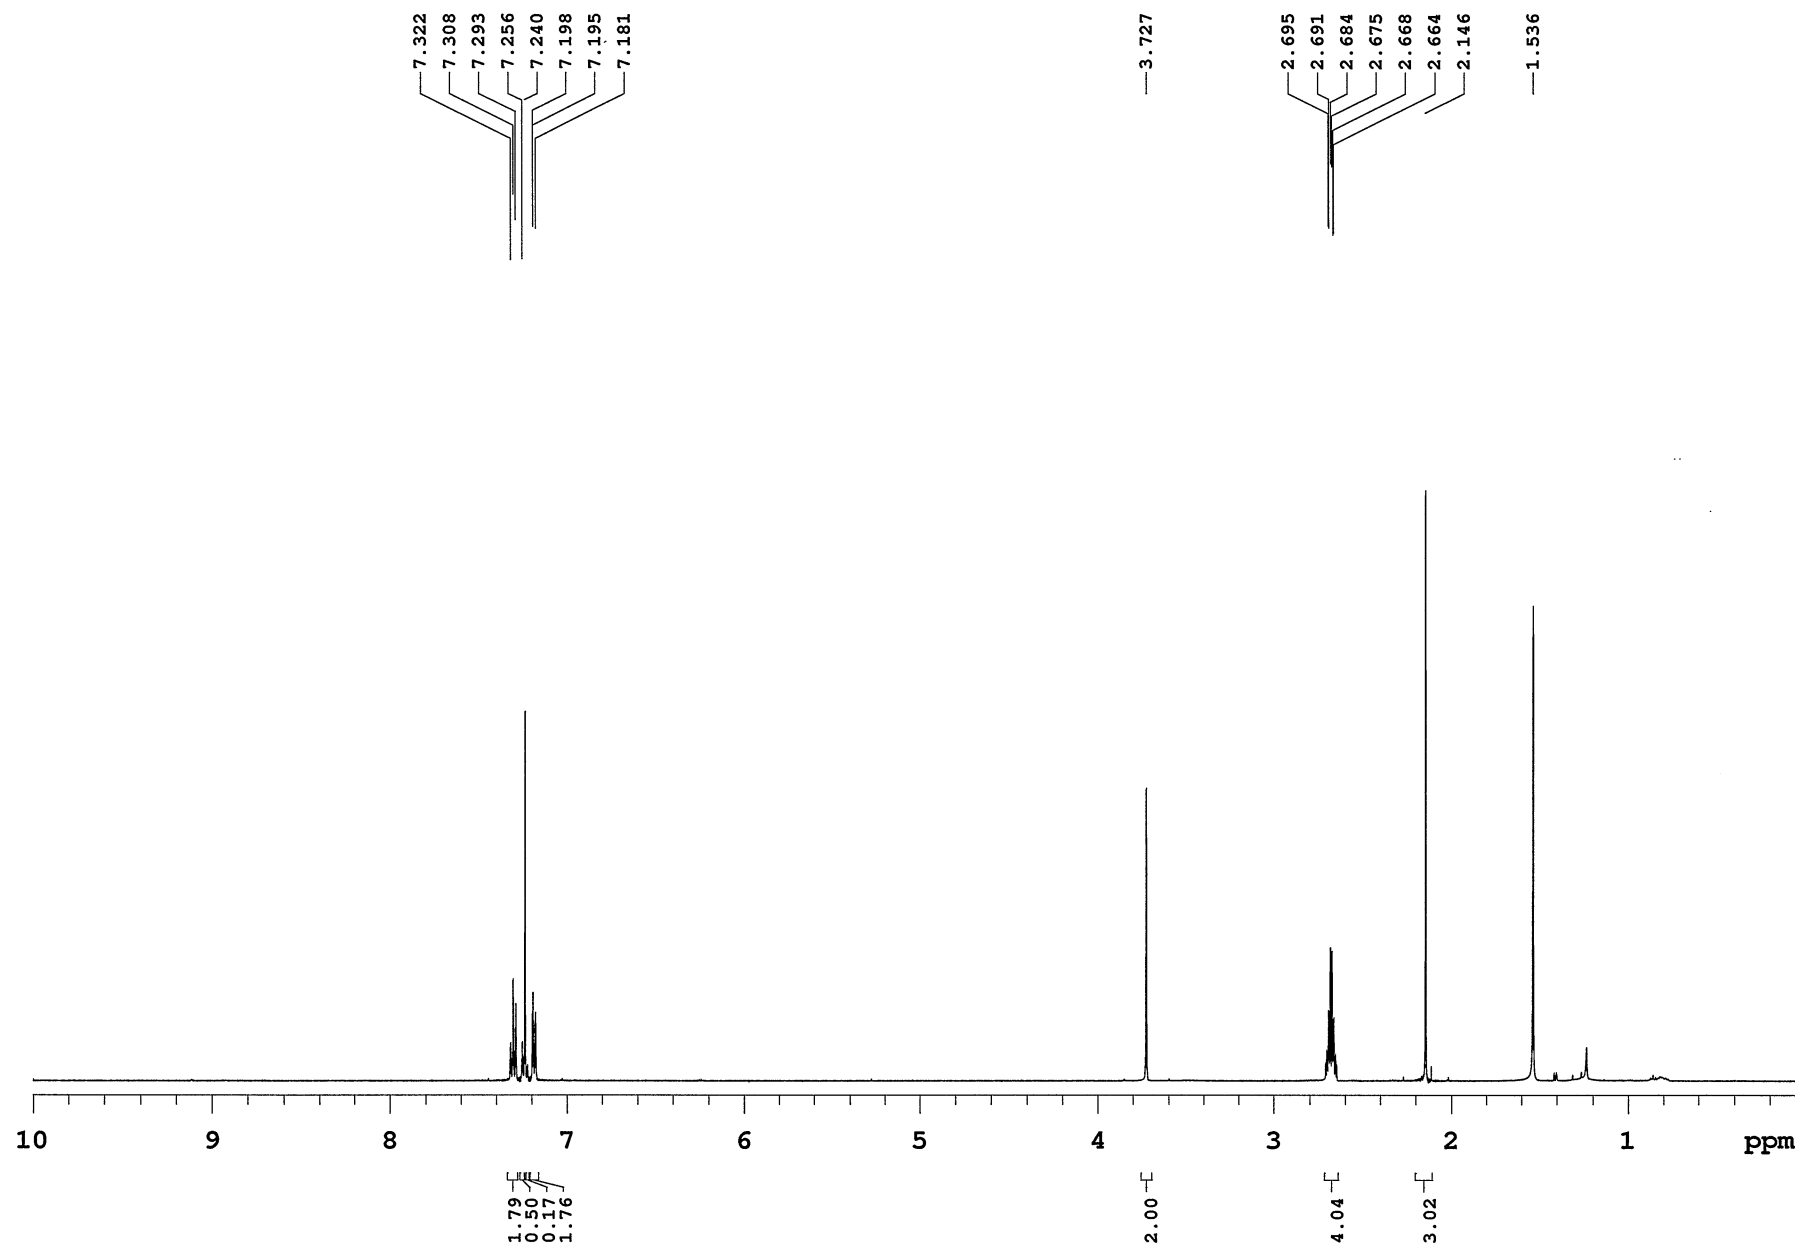

Sample Name **YYH-082**  
Date collected **2021-06-10**

Pulse sequence **CARBON**  
Solvent **cdcl3**

Temperature **25**  
Spectrometer **Agilent-NMR-inova500**

Study owner **vnmr2**  
Operator **vnmr2**

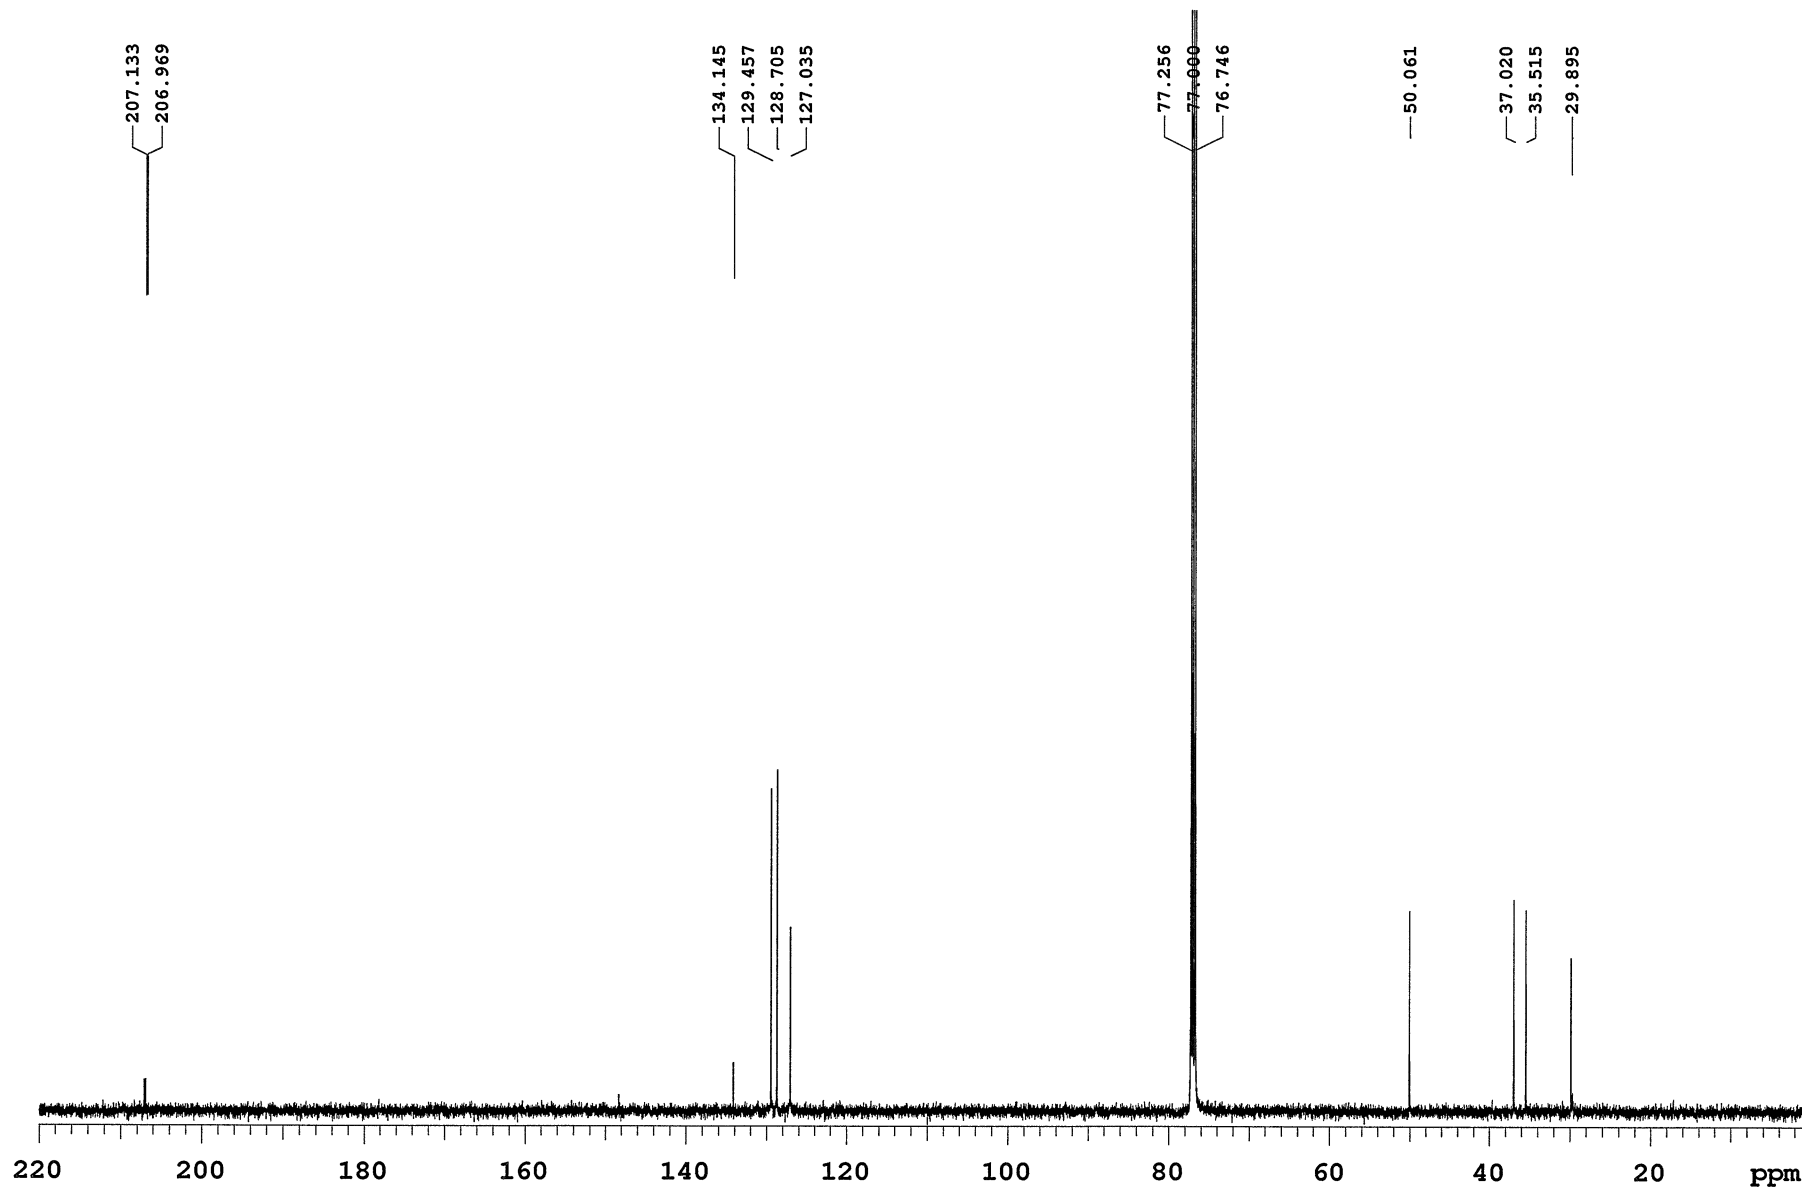

13C NMR (CDCl<sub>3</sub>, 125 MHz) of compound 4I



YYH-082

S125

Sample Name **YYH-082**  
Date collected **2021-06-11**

Pulse sequence **DEPT**  
Solvent **cdcl3**

Temperature **25**  
Spectrometer **Agilent-NMR-inova500**

Study owner **vnmr2**  
Operator **vnmr2**

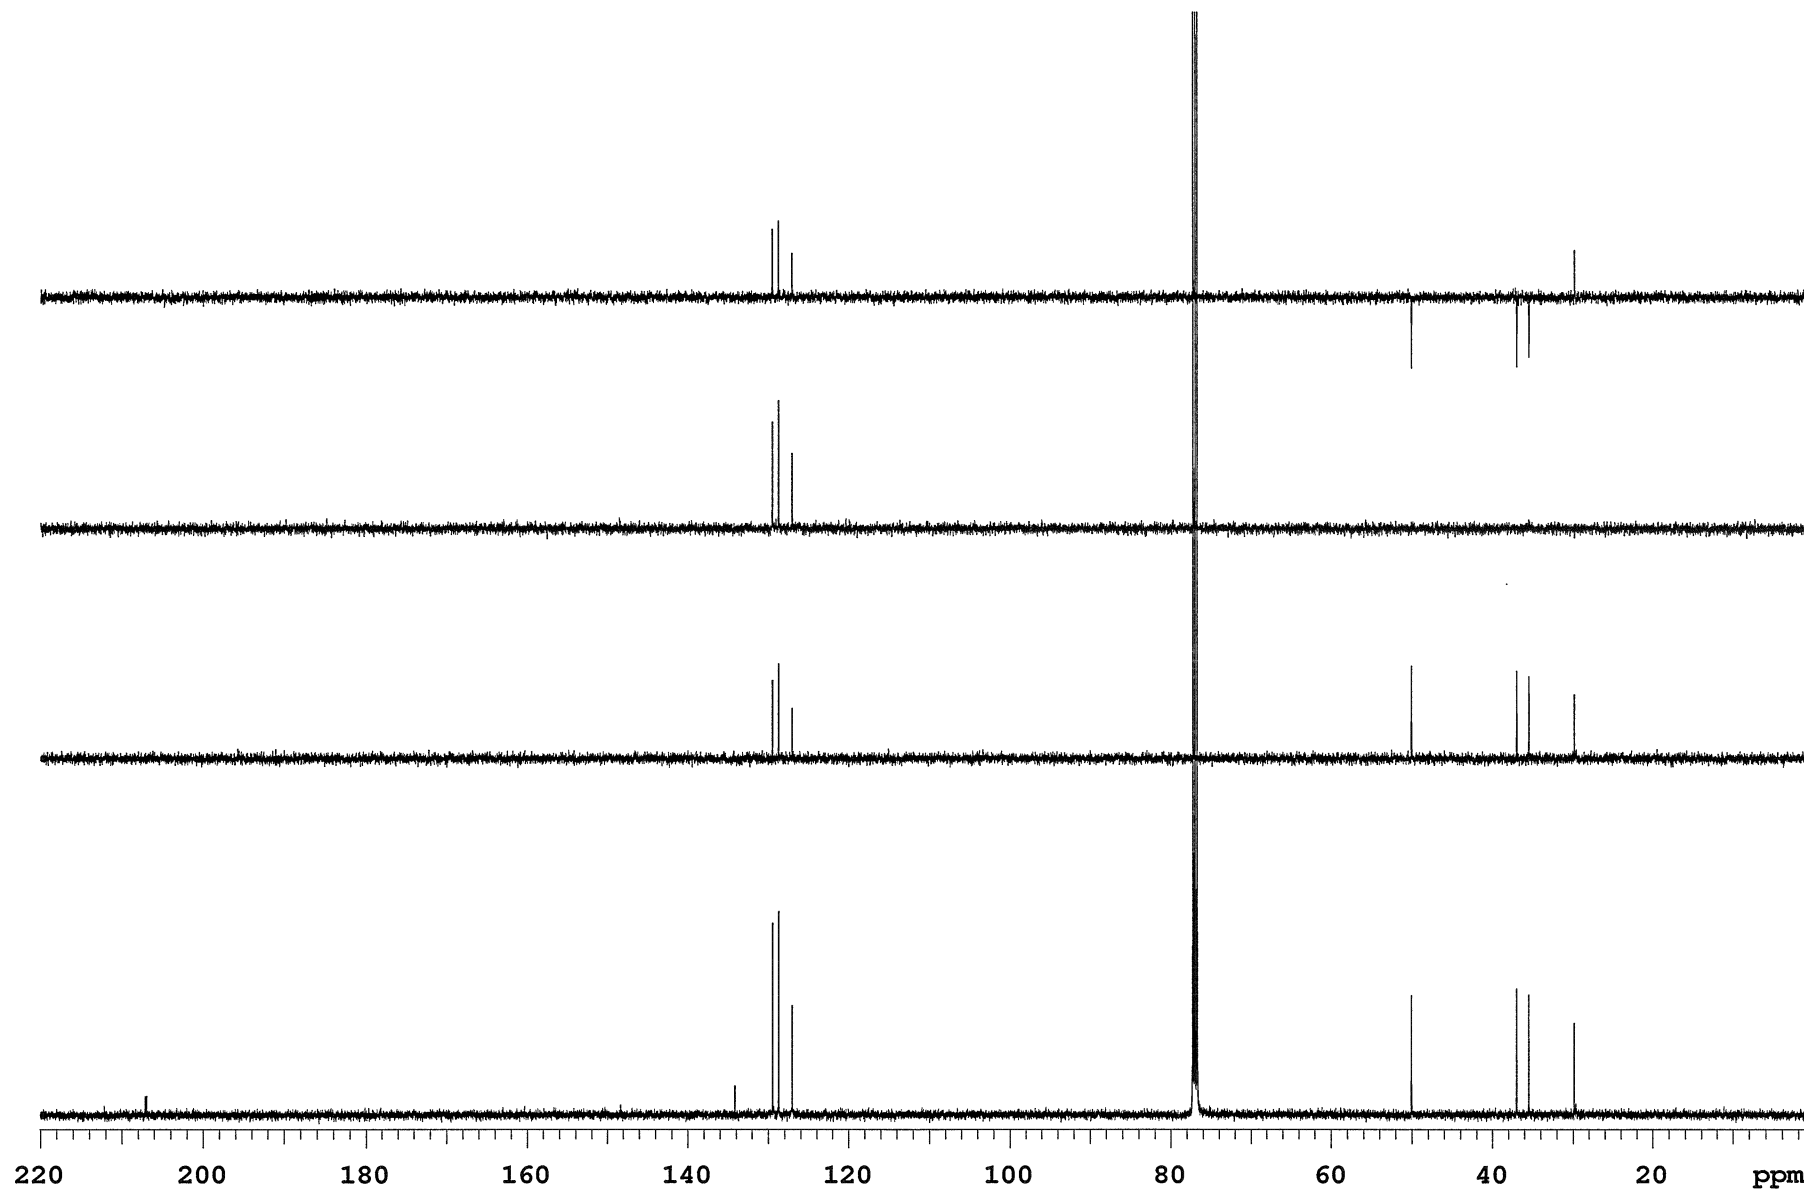

DEPT of compound 4I

Sample Name YYH-082  
Date collected 2021-06-11

Pulse sequence gHSQC  
Solvent cdcl3

Temperature 25  
Spectrometer Agilent-NMR-inova500

Study owner vnmr2  
Operator vnmr2

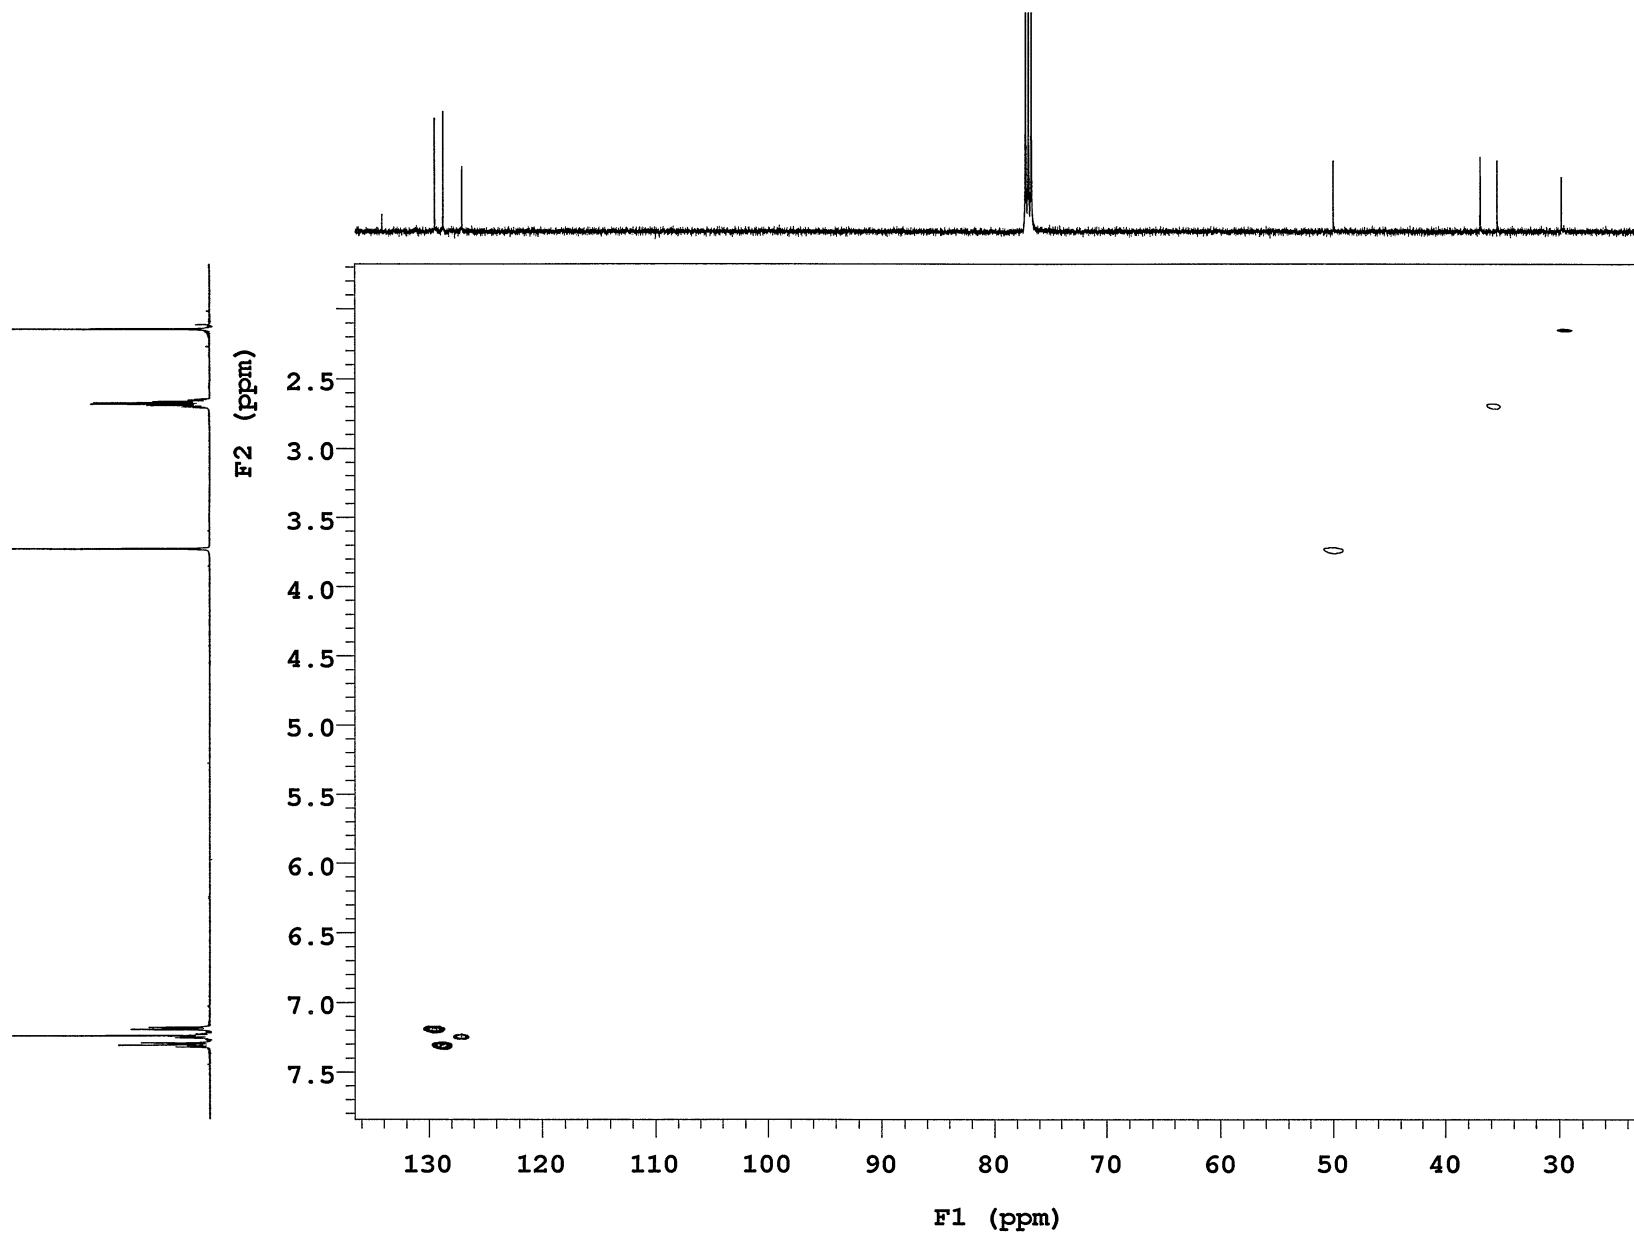

HSQC of compound 4I

Sample Name YYH-082  
Date collected 2021-06-11

Pulse sequence gCOSY  
Solvent cdcl3

Temperature 25  
Spectrometer Agilent-NMR-inova500

Study owner vnmr2  
Operator vnmr2

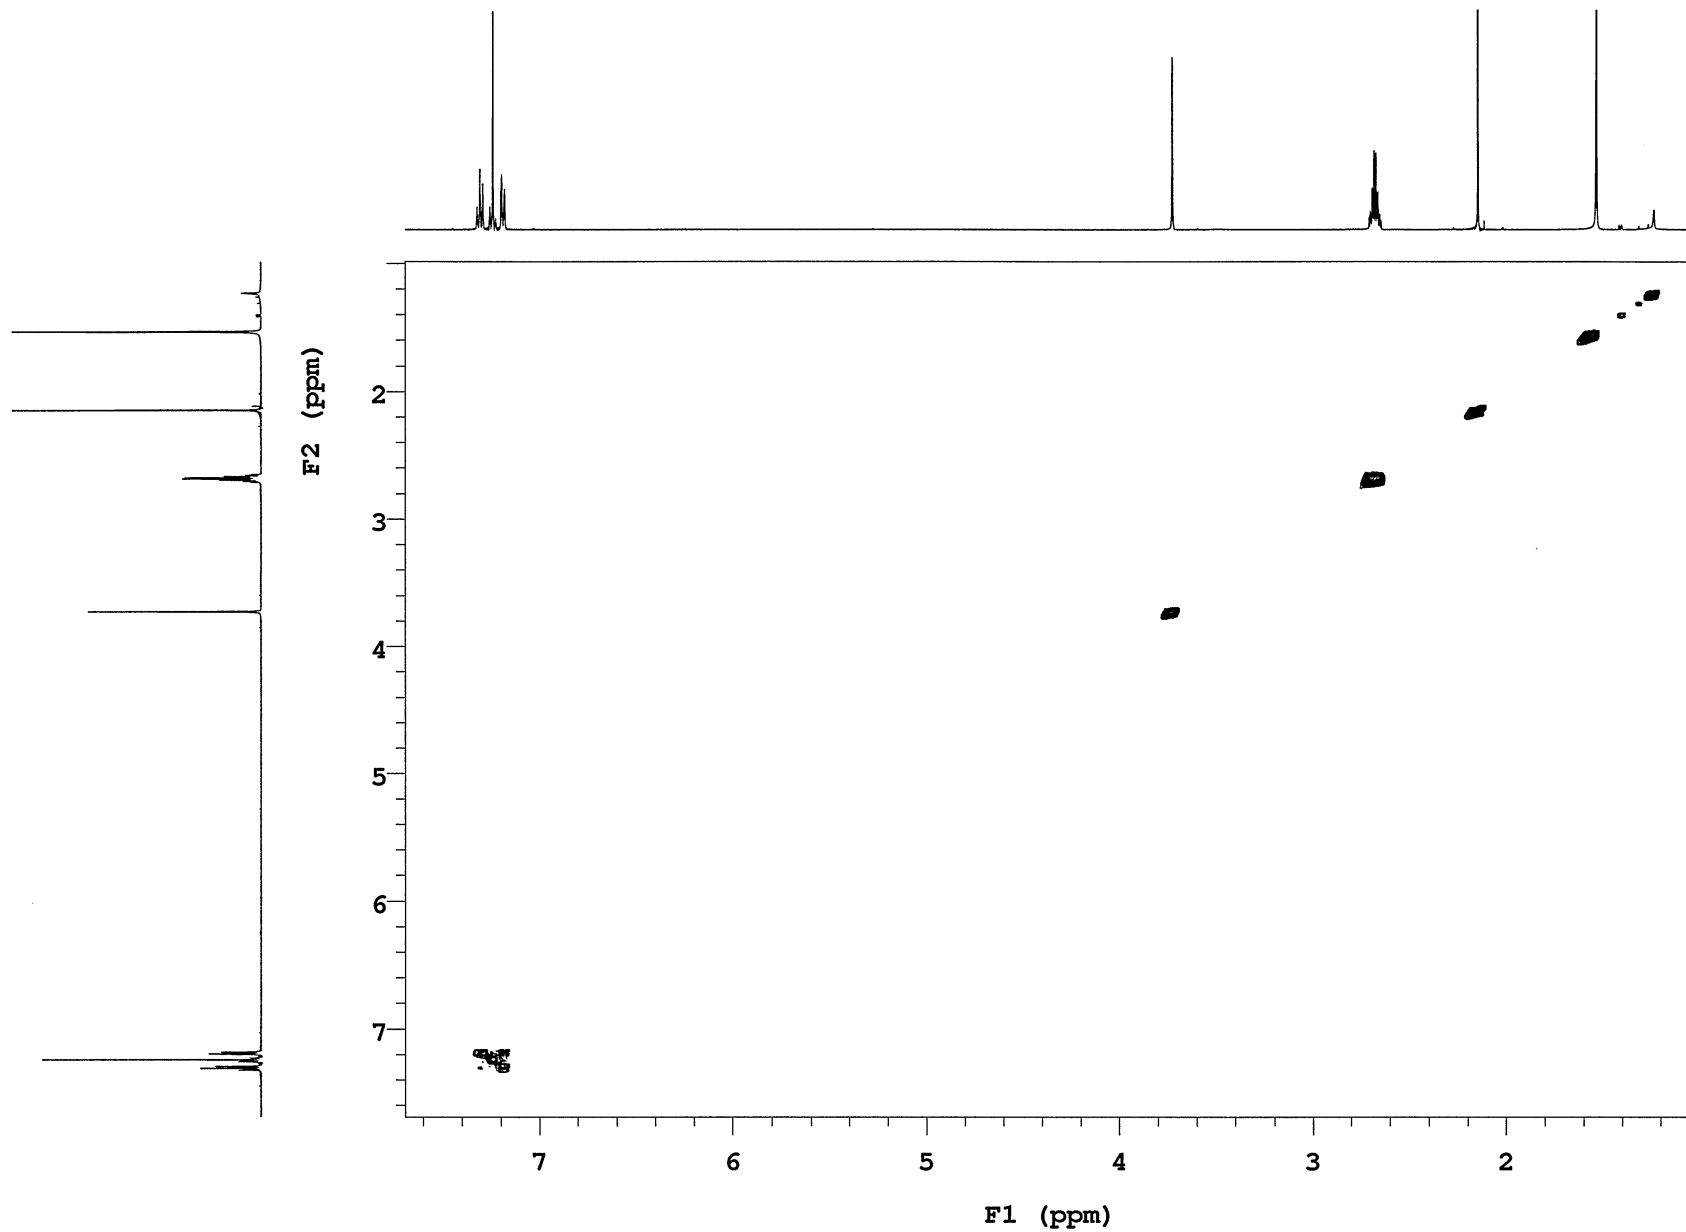

COSY of compound 4I

Sample Name **YYH-082**  
Date collected **2021-06-11**

Pulse sequence **NOESY**  
Solvent **cdcl3**

Temperature **25**  
Spectrometer **Agilent-NMR-inova500**

Study owner **vnmr2**  
Operator **vnmr2**

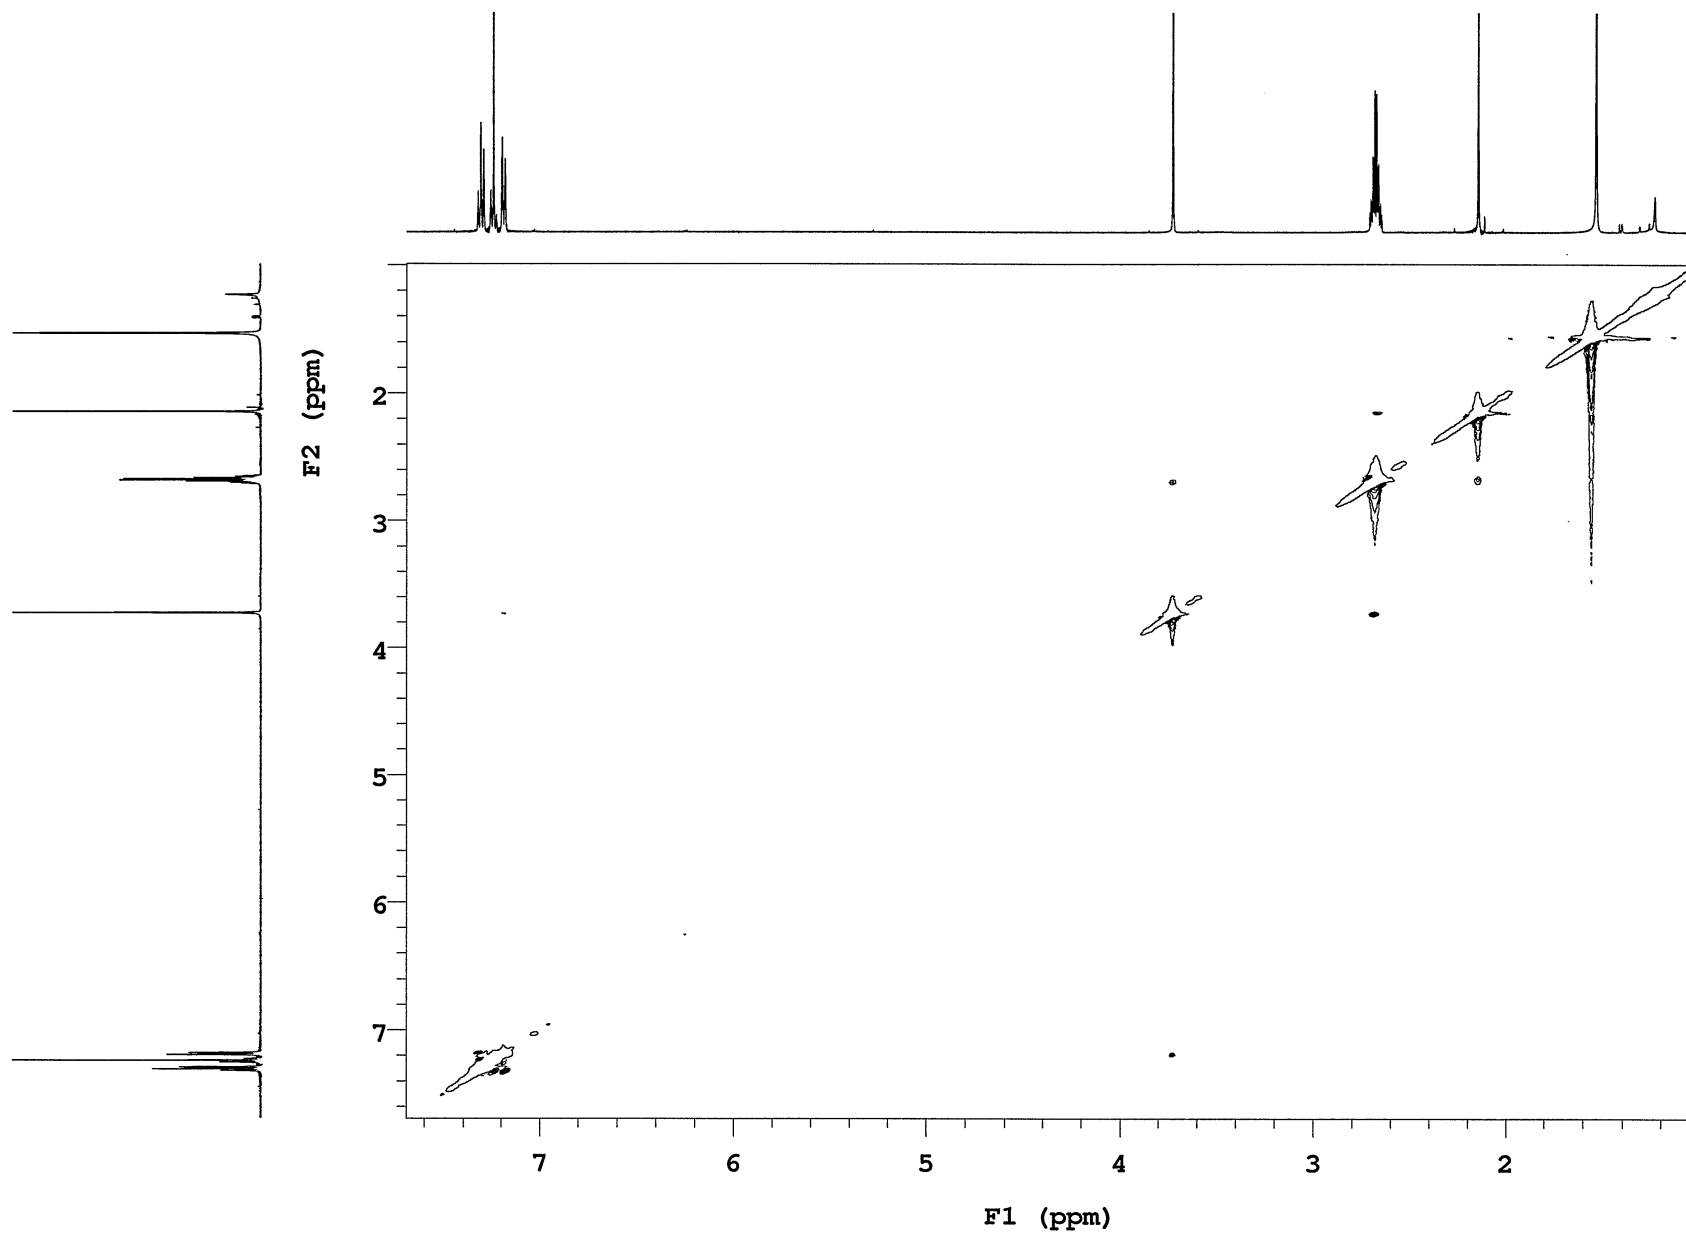

NOESY of compound 4I

YYH-088-2

Sample Name **YYH-088-2**  
Date collected **2021-07-16**Pulse sequence **PROTON**  
Solvent **cdcl3**Temperature **25**  
Spectrometer **Agilent-NMR-inova500**Study owner **vnmr2**  
Operator **vnmr2**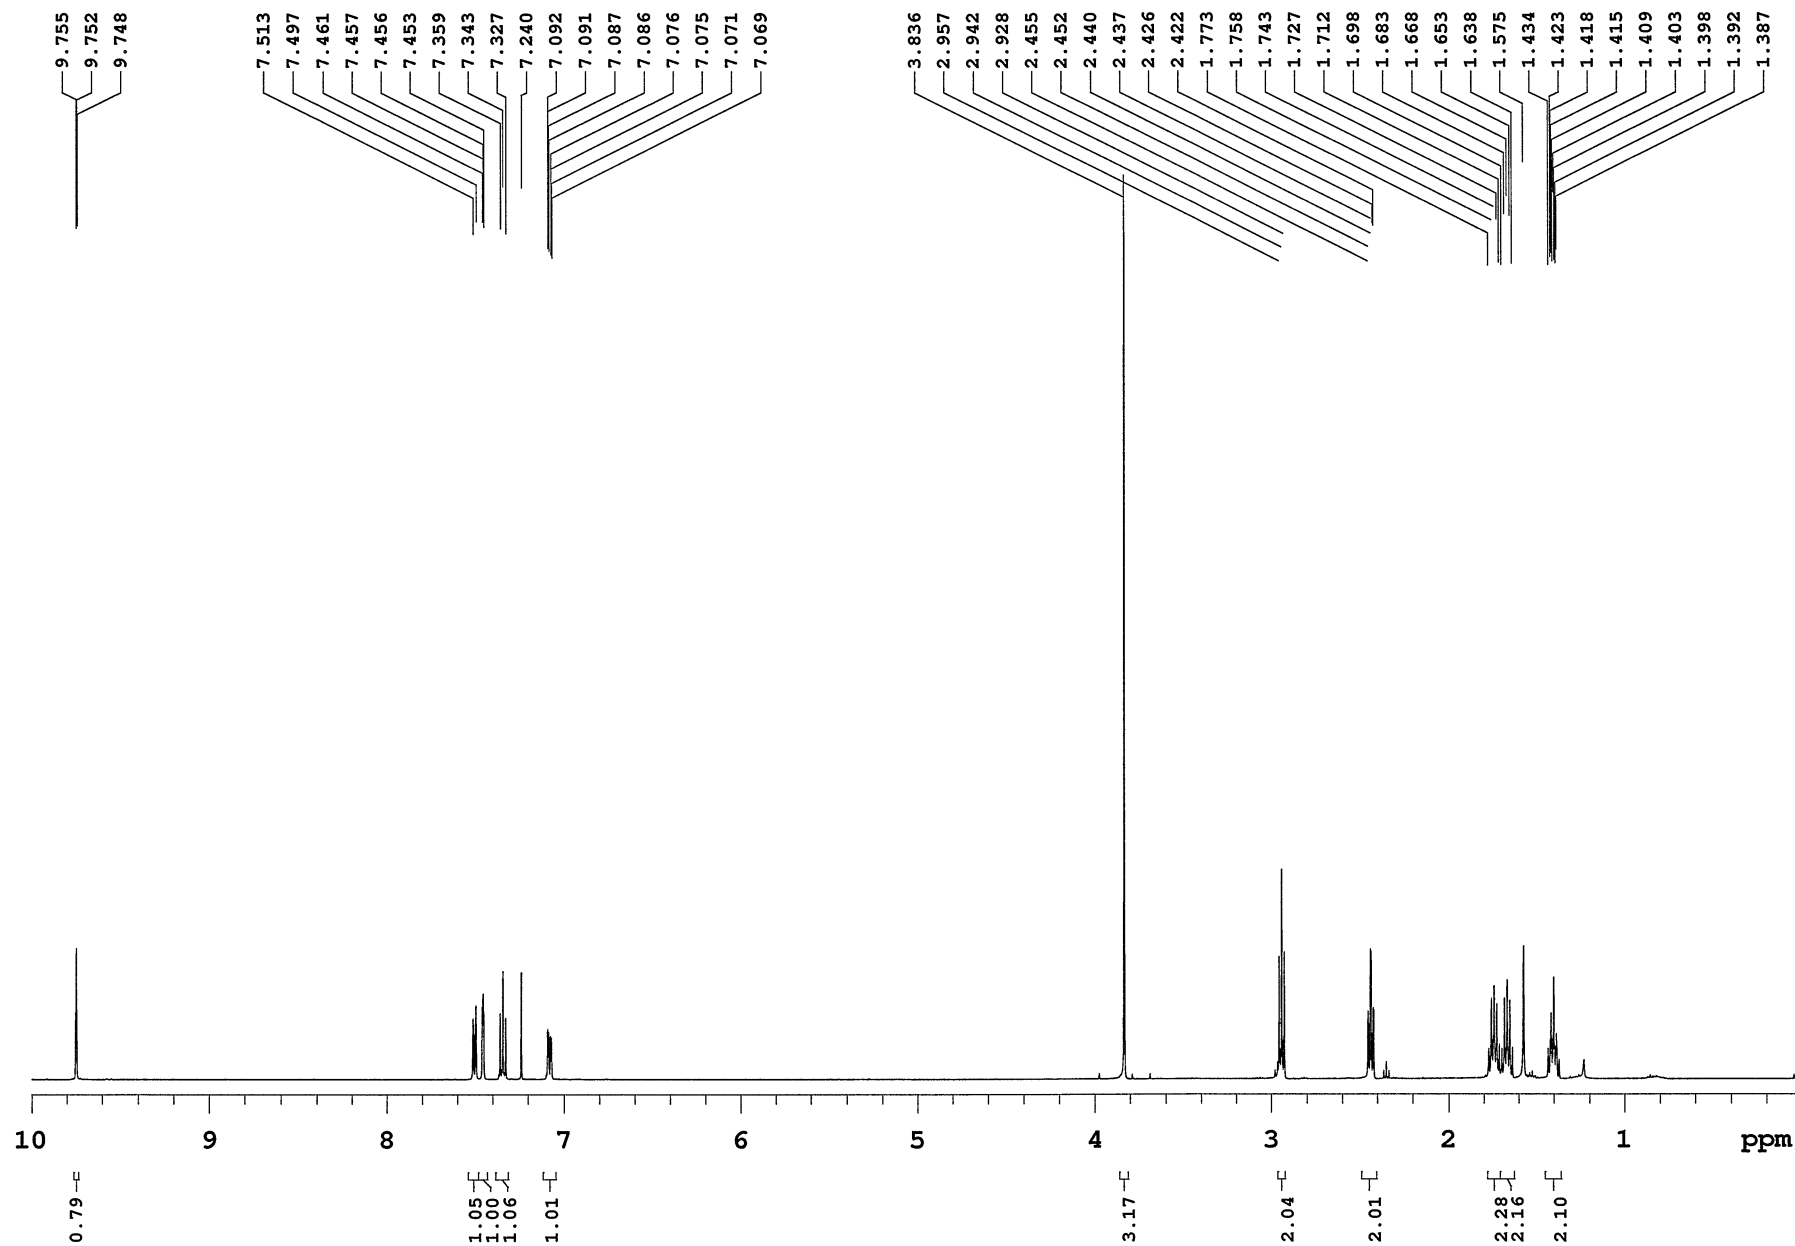

Sample Name **YYH-088-2**  
Date collected **2021-07-16**

Pulse sequence **CARBON**  
Solvent **cdcl3**

Temperature **25**  
Spectrometer **Agilent-NMR-inova500**

Study owner **vnmr2**  
Operator **vnmr2**

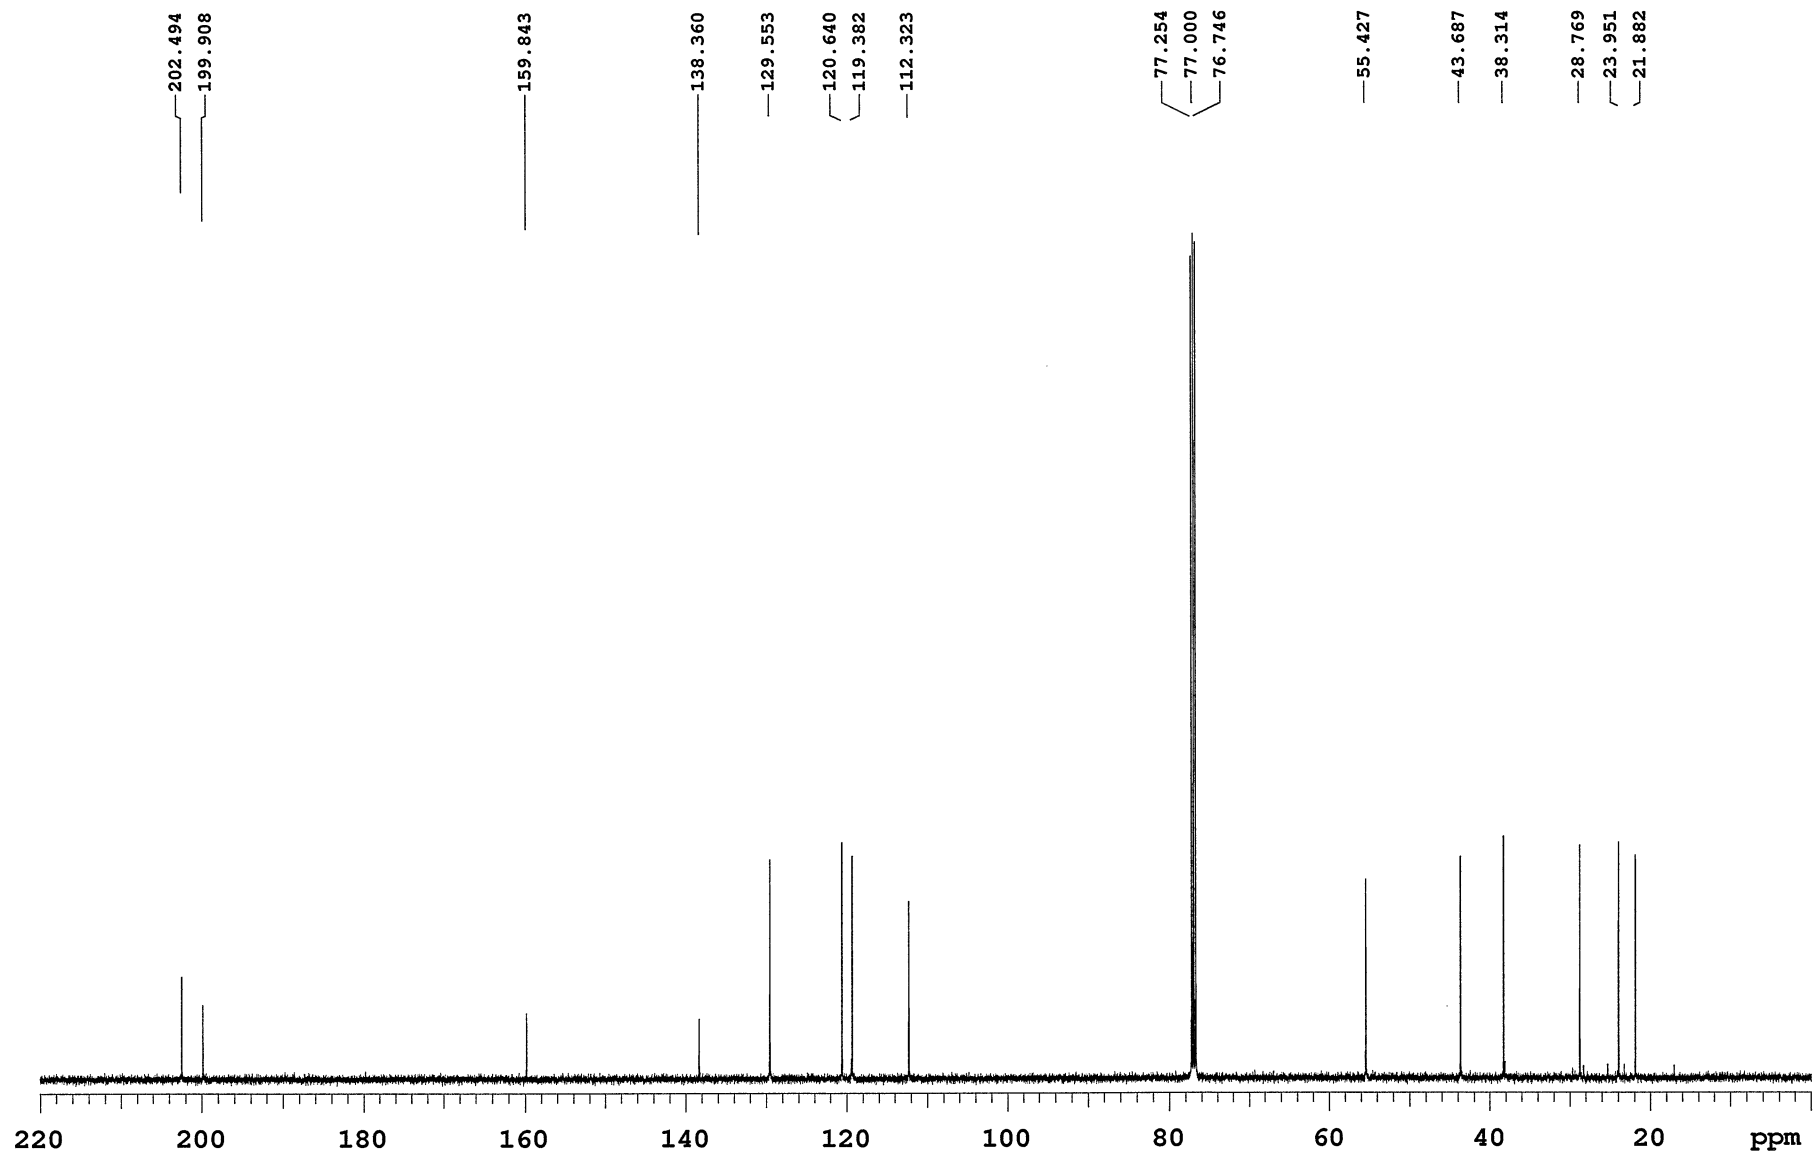

13C NMR (CDCl<sub>3</sub>, 125 MHz) of compound **4m**

Sample Name **YYH-088-2**  
Date collected **2021-07-16**

Pulse sequence **DEPT**  
Solvent **cdcl3**

Temperature **25**  
Spectrometer **Agilent-NMR-inova500**

Study owner **vnmr2**  
Operator **vnmr2**

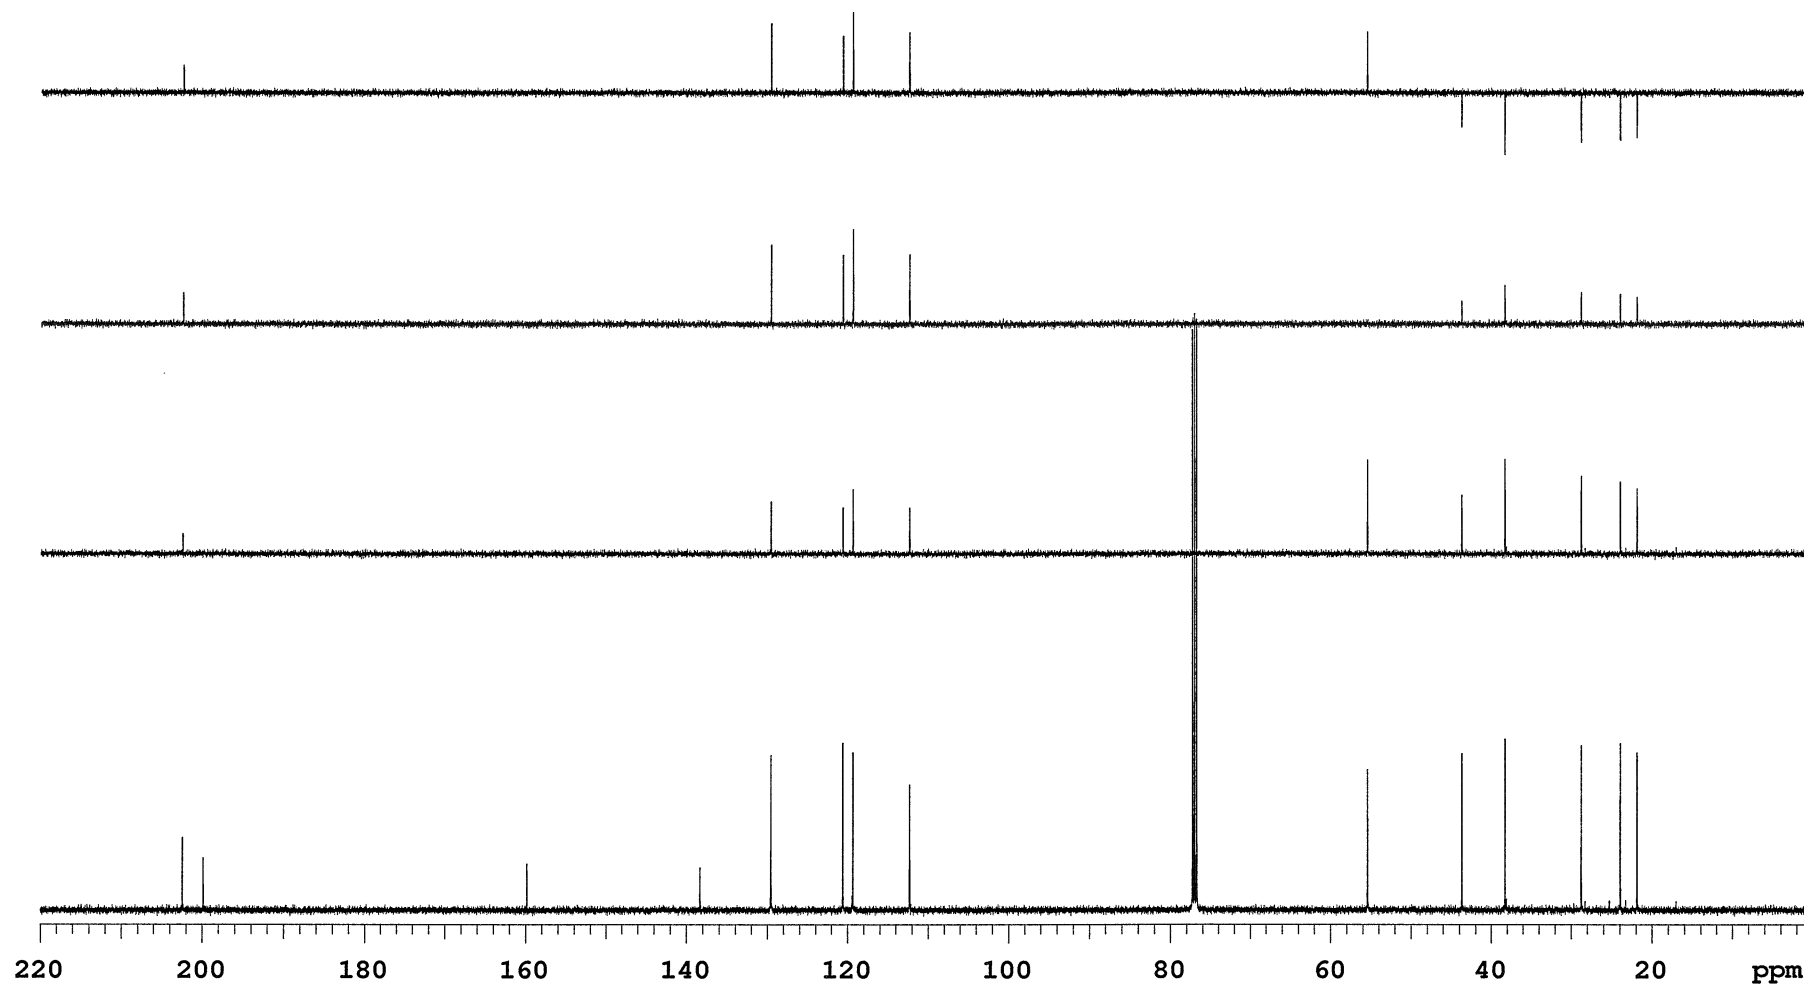

DEPT of compound 4m

Sample Name **YYH-088**  
Date collected **2021-07-02**

Pulse sequence **gHSQC**  
Solvent **cdcl3**

Temperature **25**  
Spectrometer **Agilent-NMR-inova500**

Study owner **vnmr2**  
Operator **vnmr2**

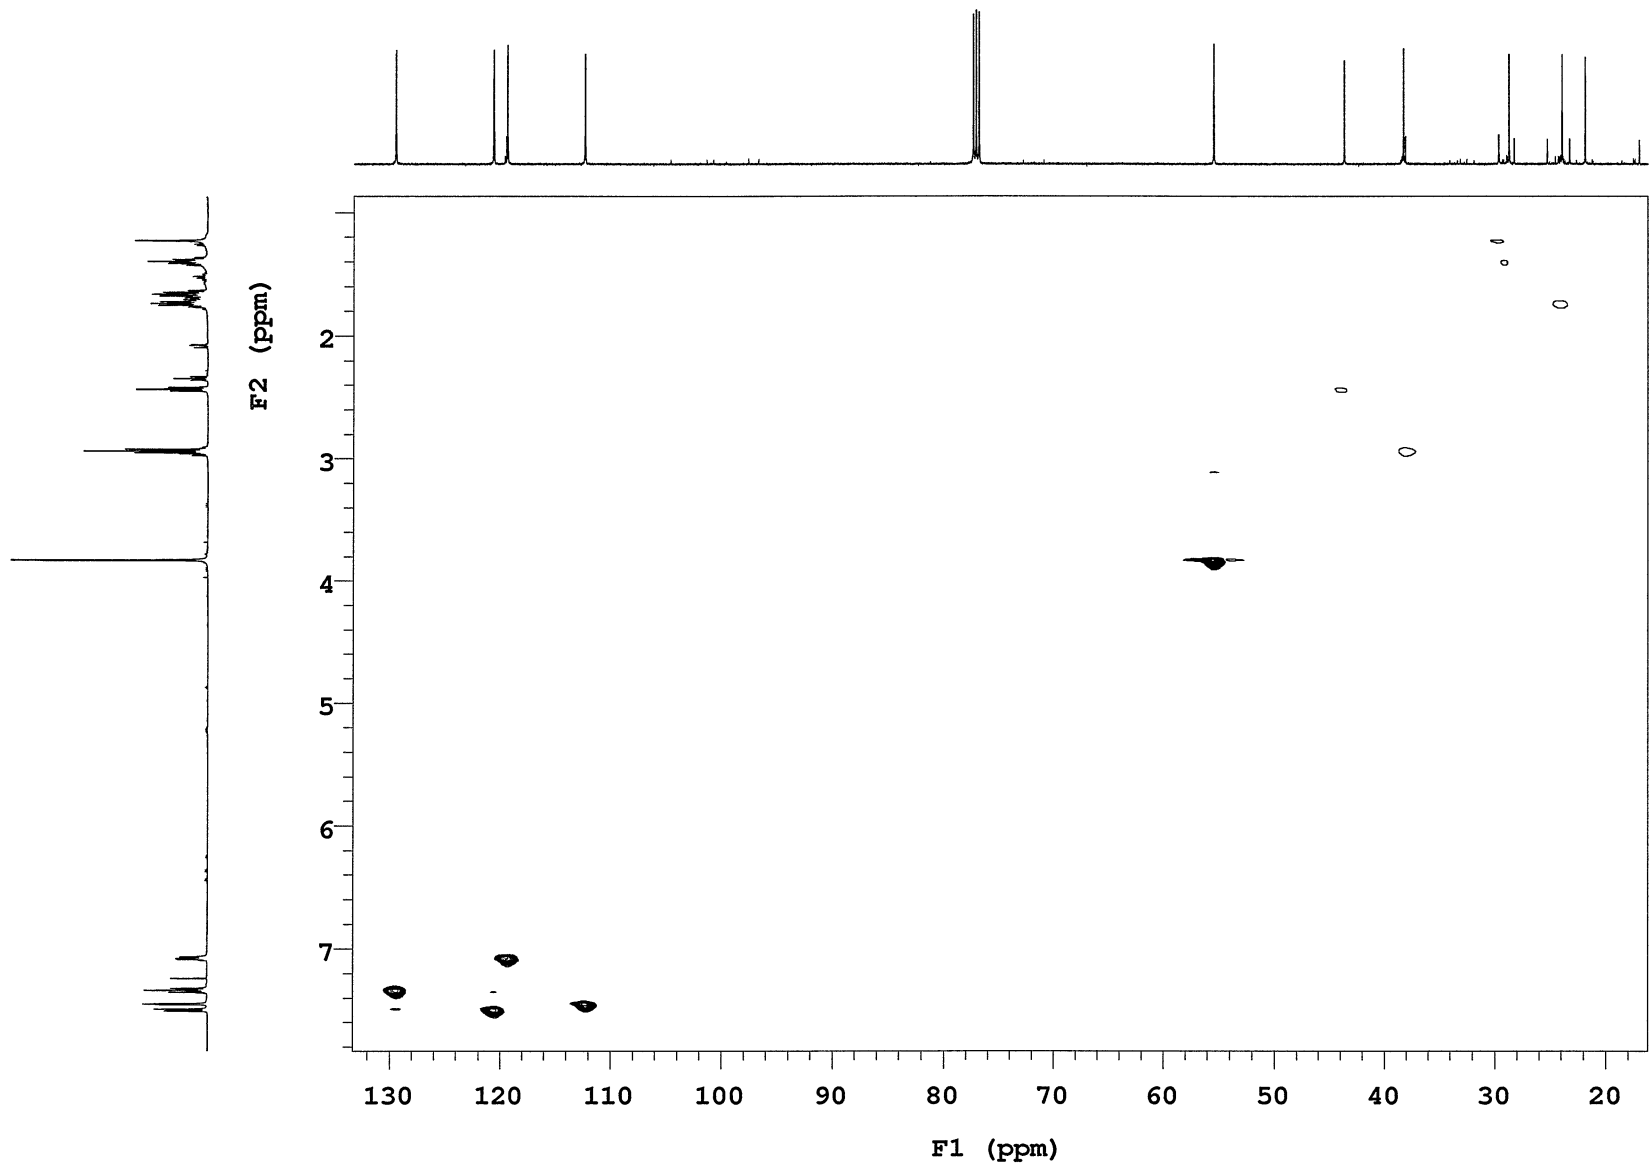HSQC of compound **4m**



Sample Name **YYH-088**  
Date collected **2021-07-02**

Pulse sequence **gCOSY**  
Solvent **cdcl3**

Temperature **25**  
Spectrometer **Agilent-NMR-inova500**

Study owner **vnmr2**  
Operator **vnmr2**

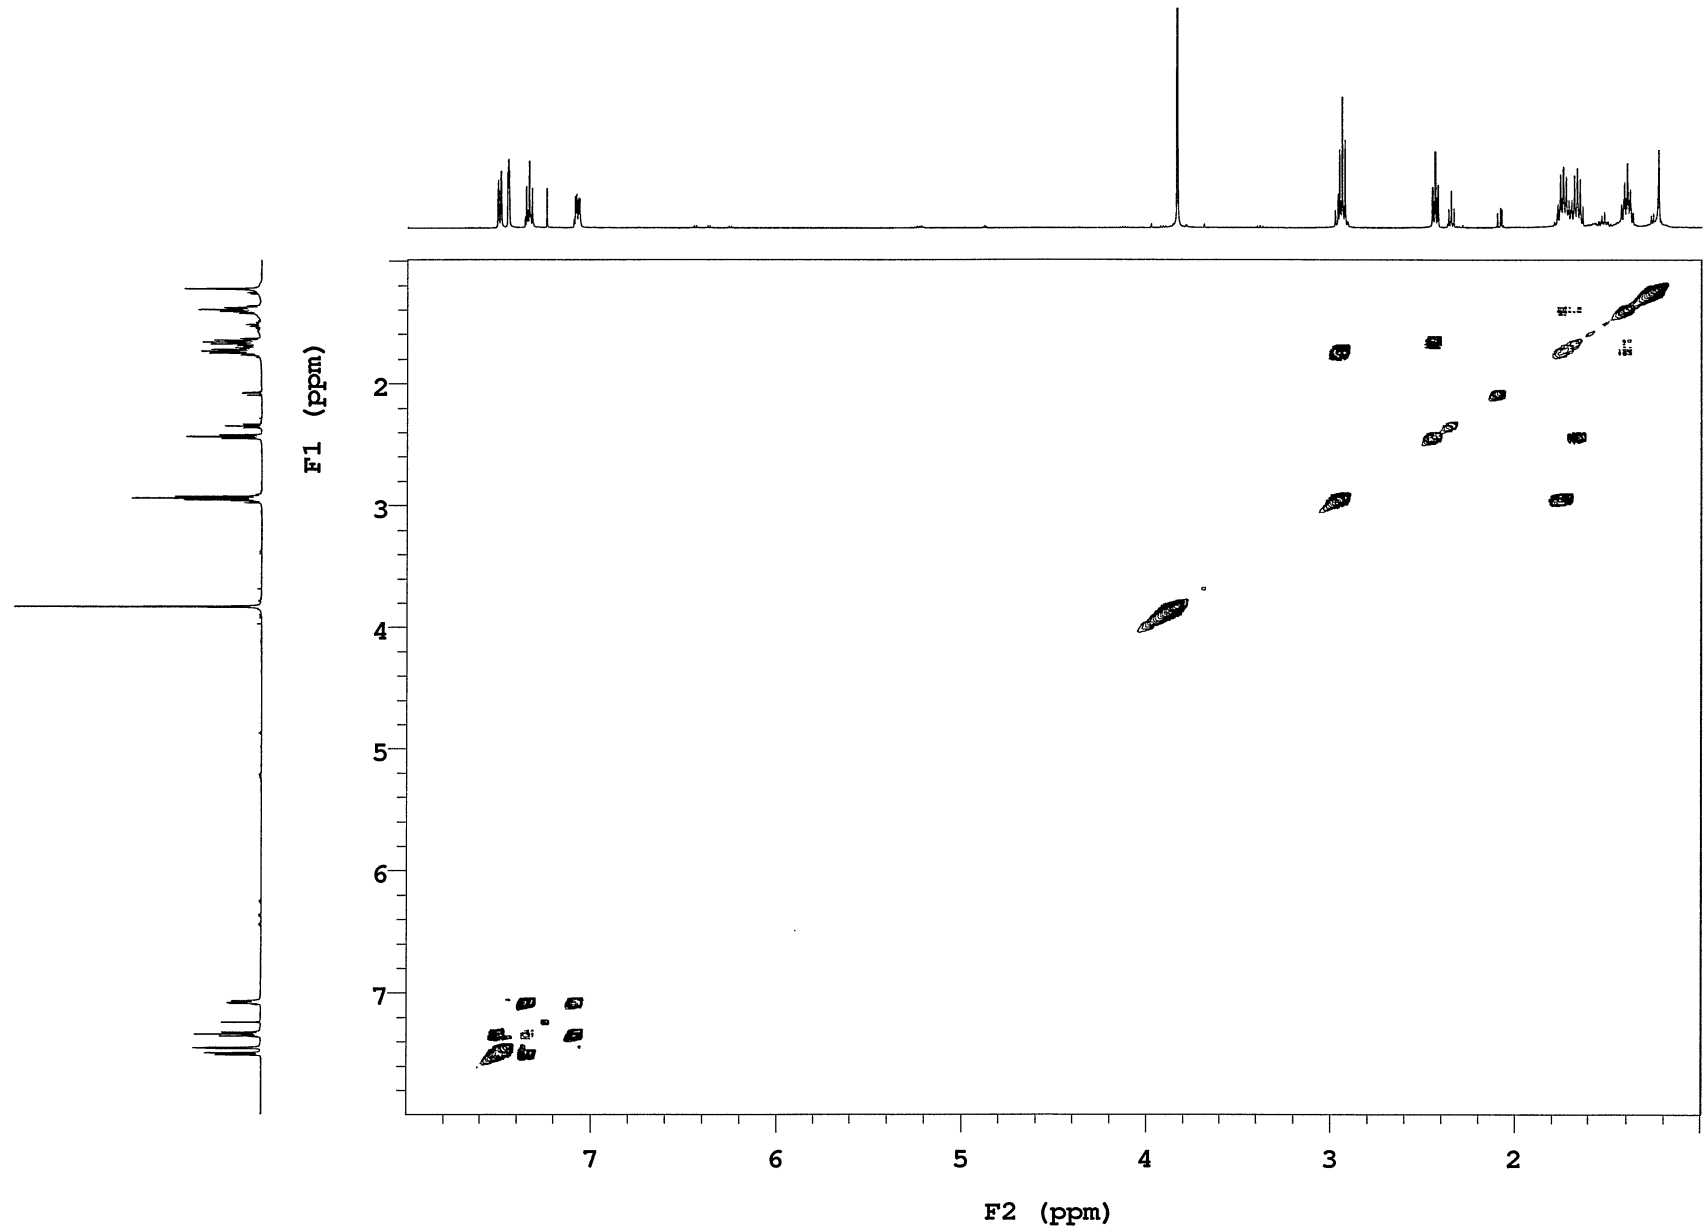

COSY of compound **4m**

Sample Name YYH-088  
Date collected 2021-07-02

Pulse sequence NOESY  
Solvent cdcl3

Temperature 25  
Spectrometer Agilent-NMR-inova500

Study owner vnmr2  
Operator vnmr2

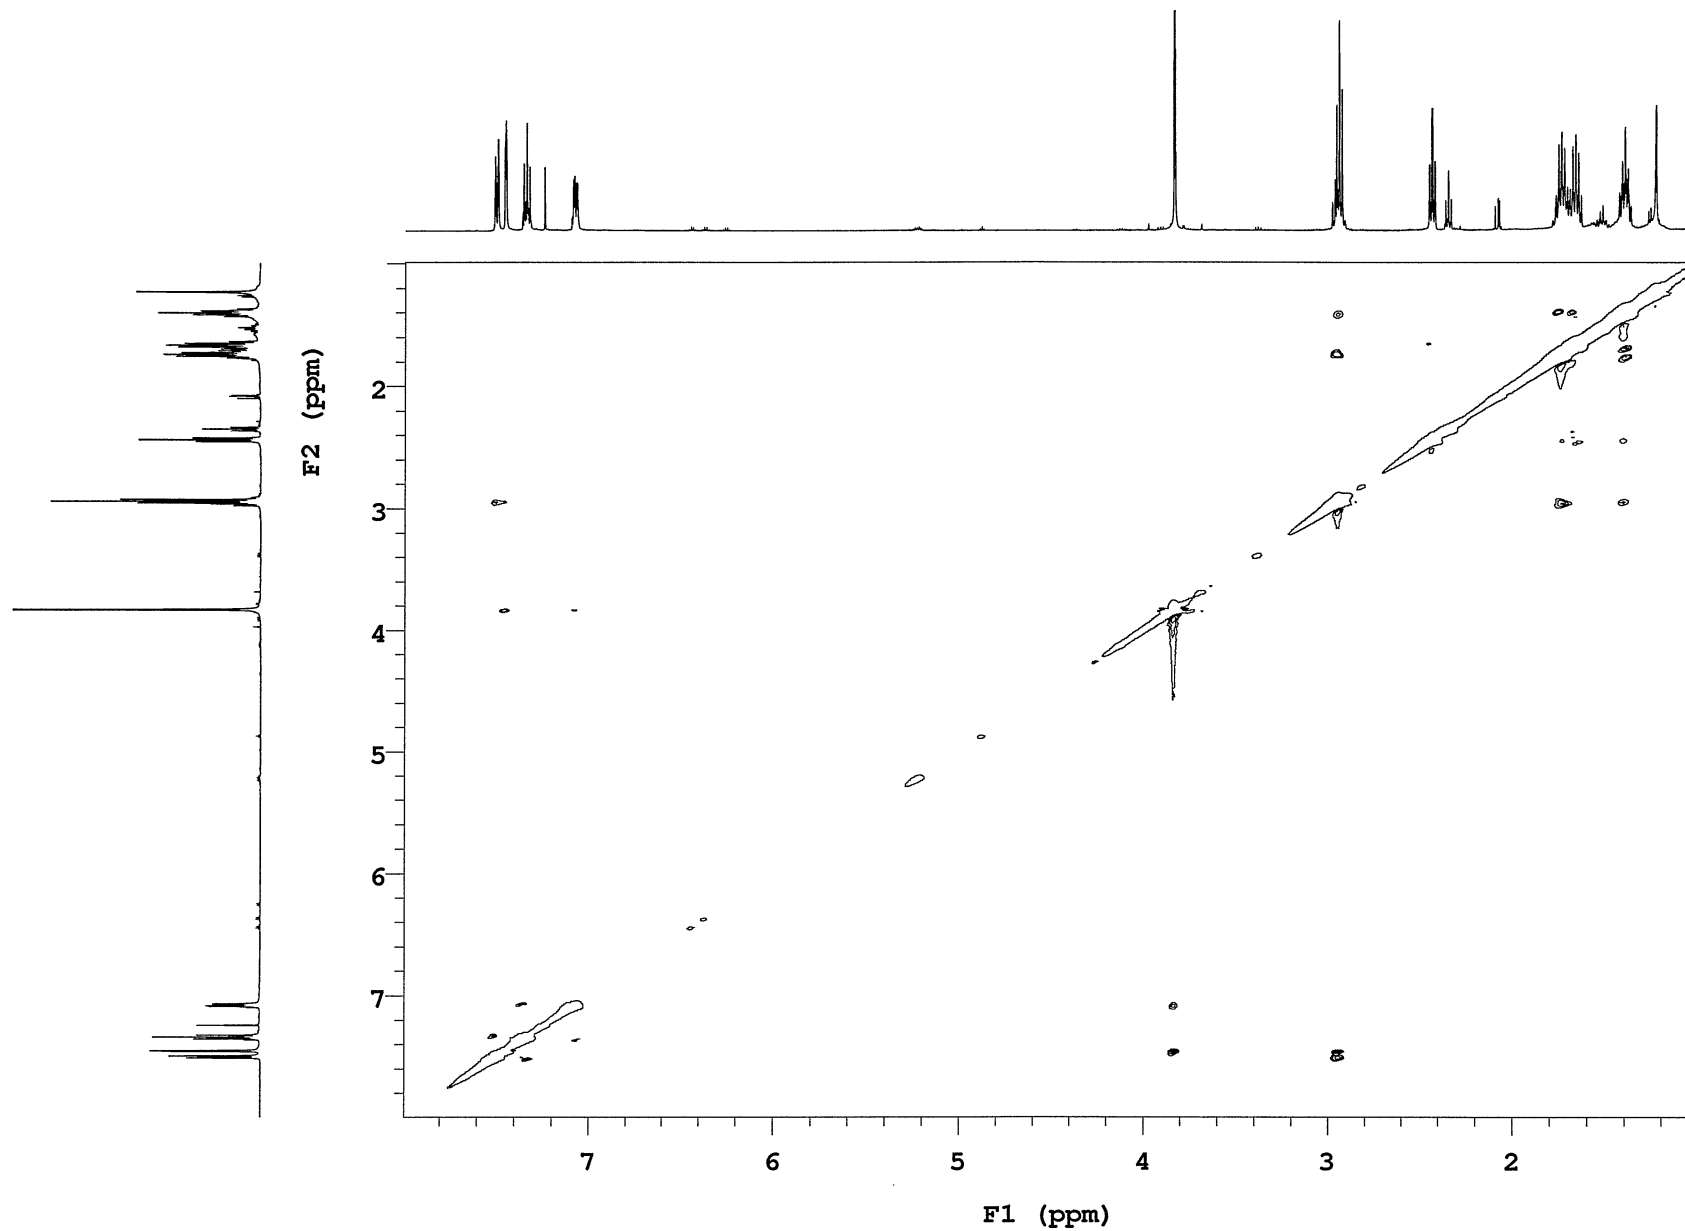

NOESY of compound 4m

Sample Name **YYH-090**  
Date collected **2021-08-27**Pulse sequence **PROTON**  
Solvent **cdcl3**Temperature **25**  
Spectrometer **Agilent-NMR-inova500**Study owner **vnmr2**  
Operator **vnmr2**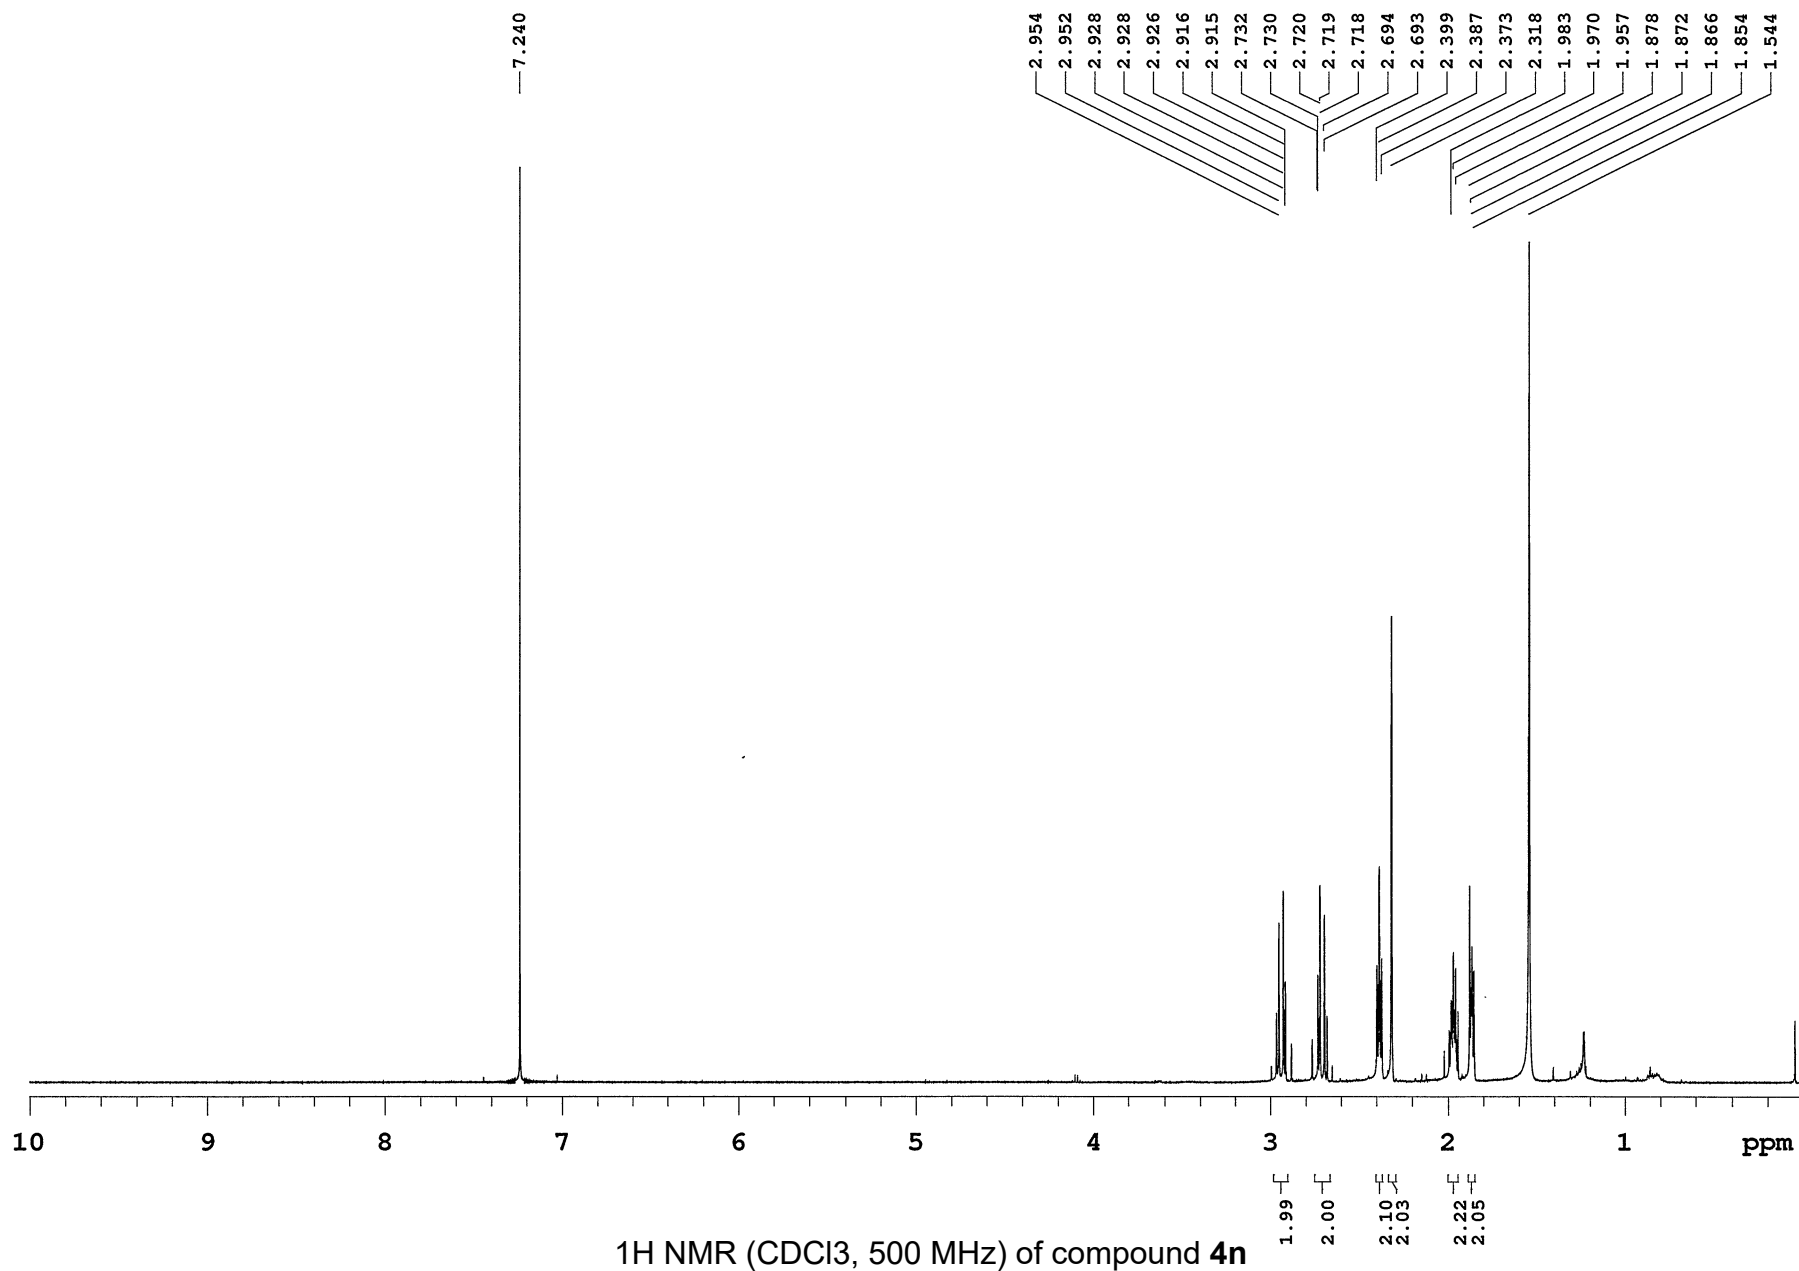

Sample Name **YYH-090**  
Date collected **2021-08-27**

Pulse sequence **CARBON**  
Solvent **cdcl3**

Temperature **25**  
Spectrometer **Agilent-NMR-inova500**

Study owner **vnmr2**  
Operator **vnmr2**

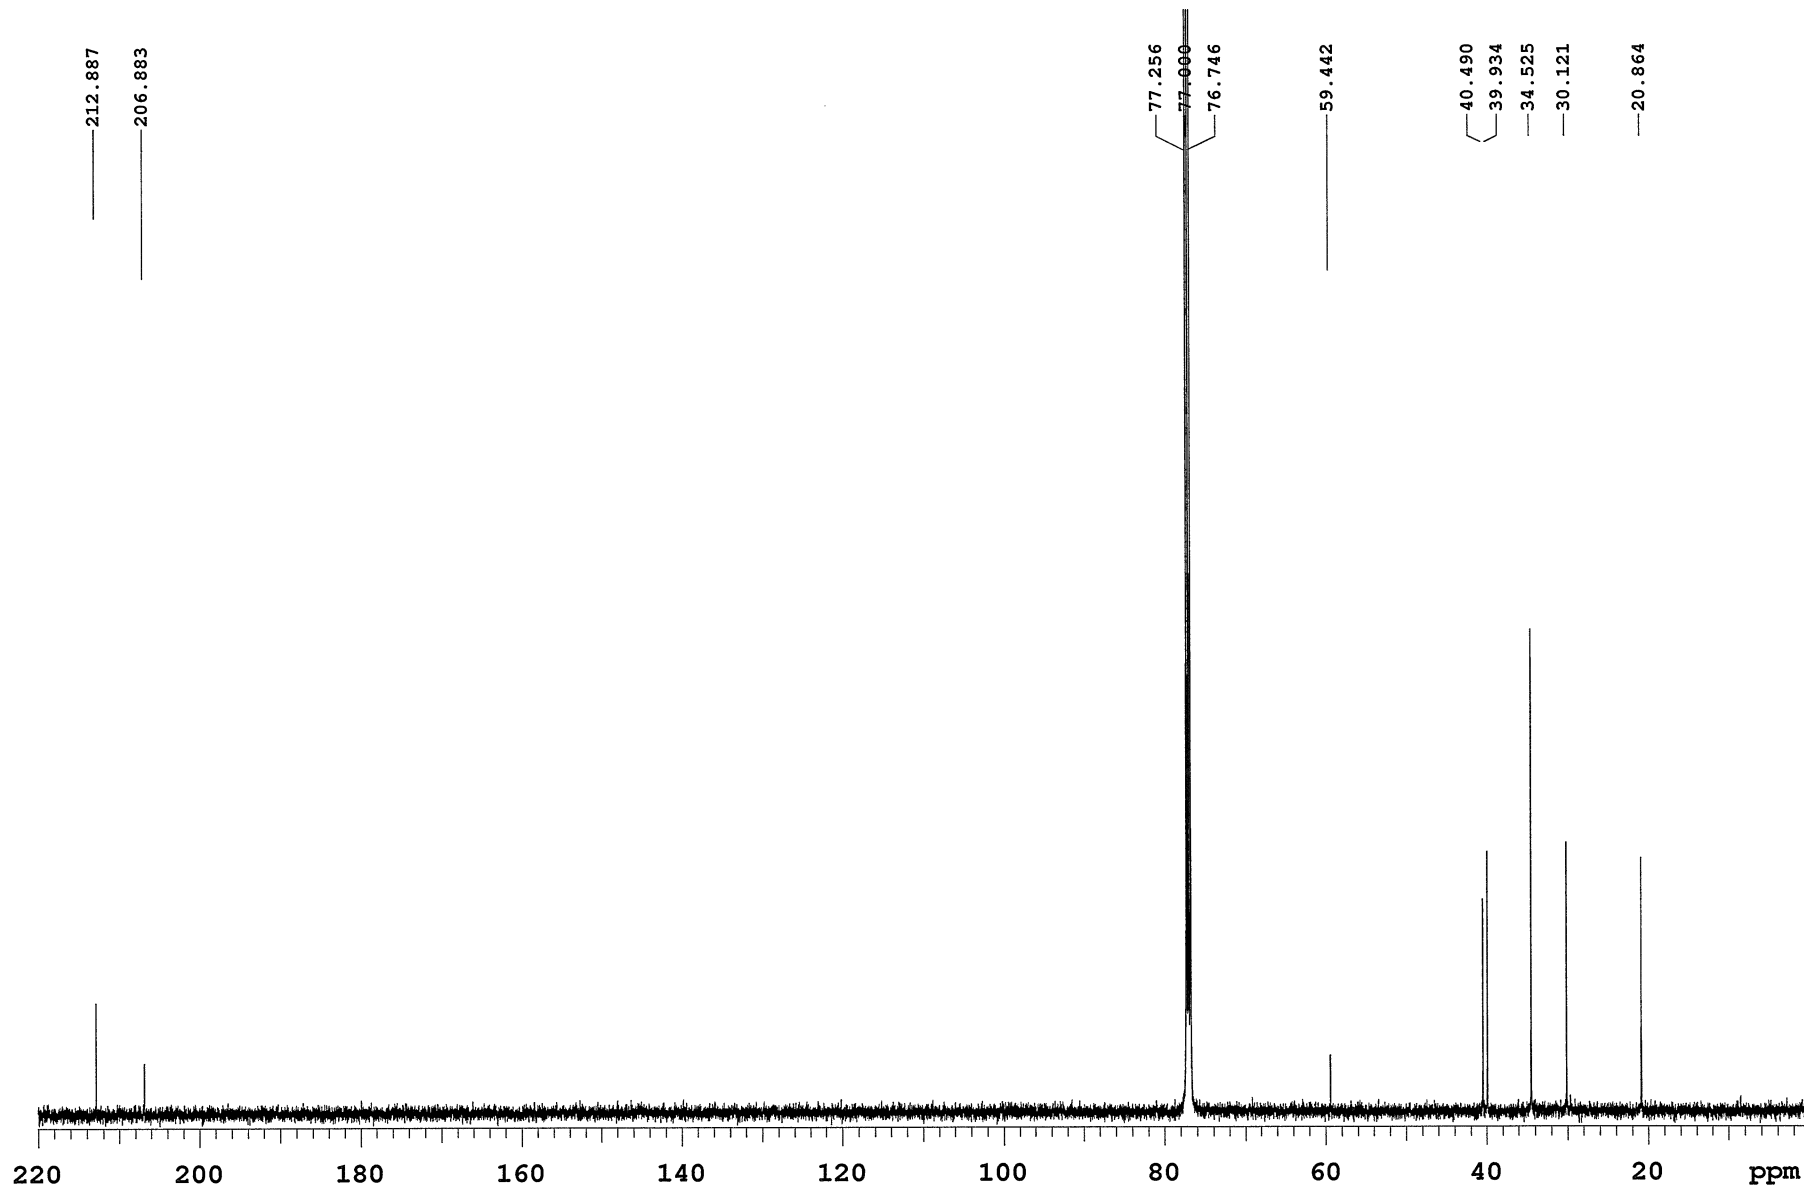

13C NMR (CDCl<sub>3</sub>, 125 MHz) of compound **4n**

Sample Name YYH-090  
Date collected 2021-08-27

Pulse sequence DEPT  
Solvent cdcl3

Temperature 25  
Spectrometer Agilent-NMR-inova500

Study owner vnmr2  
Operator vnmr2

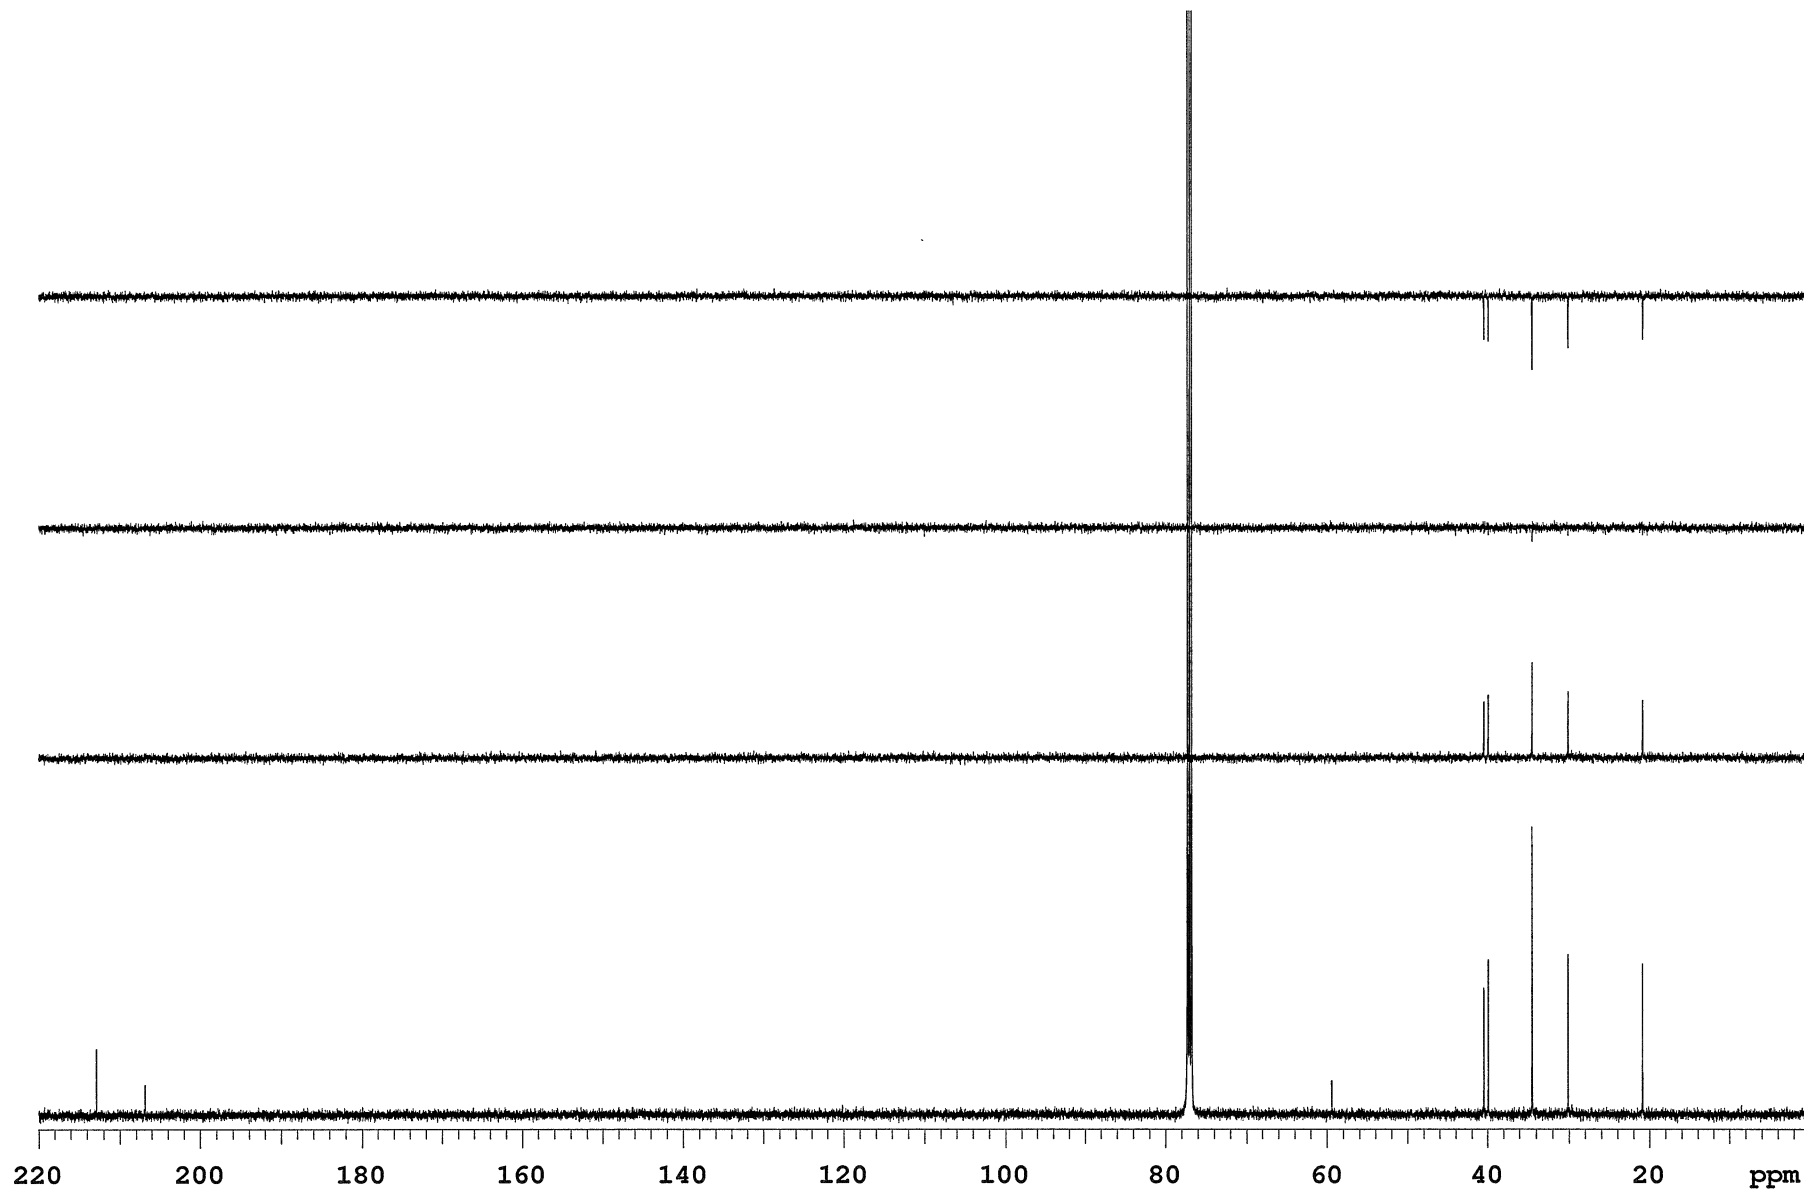

DEPT of compound 4n

Sample Name YYH-102  
Date collected 2021-07-01

Pulse sequence PROTON  
Solvent cdcl3

Temperature 25  
Spectrometer Agilent-NMR-inova500

Study owner vnmr2  
Operator vnmr2

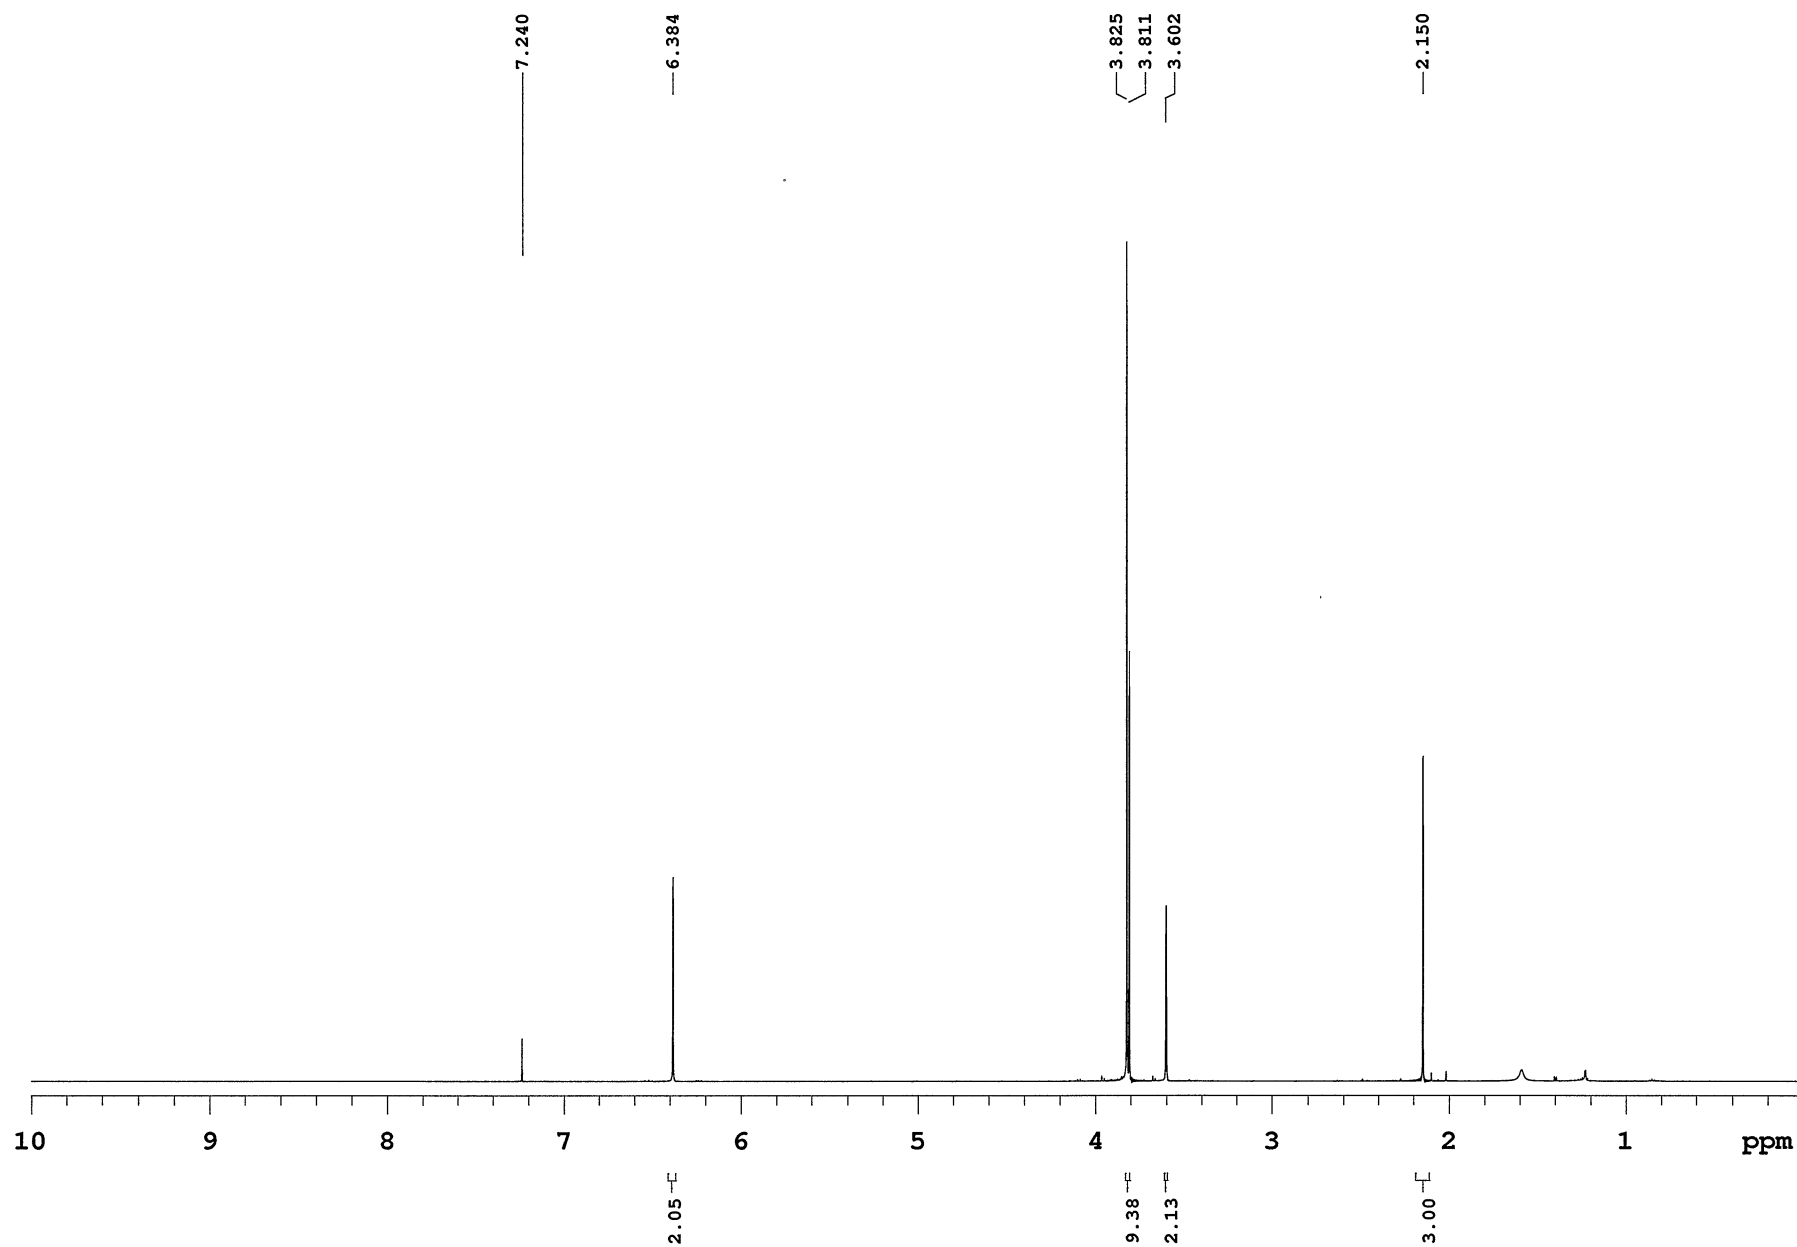

Sample Name YYH-102  
Date collected 2021-07-01

Pulse sequence CARBON  
Solvent cdcl3

Temperature 25  
Spectrometer Agilent-NMR-inova500

Study owner vnmr2  
Operator vnmr2

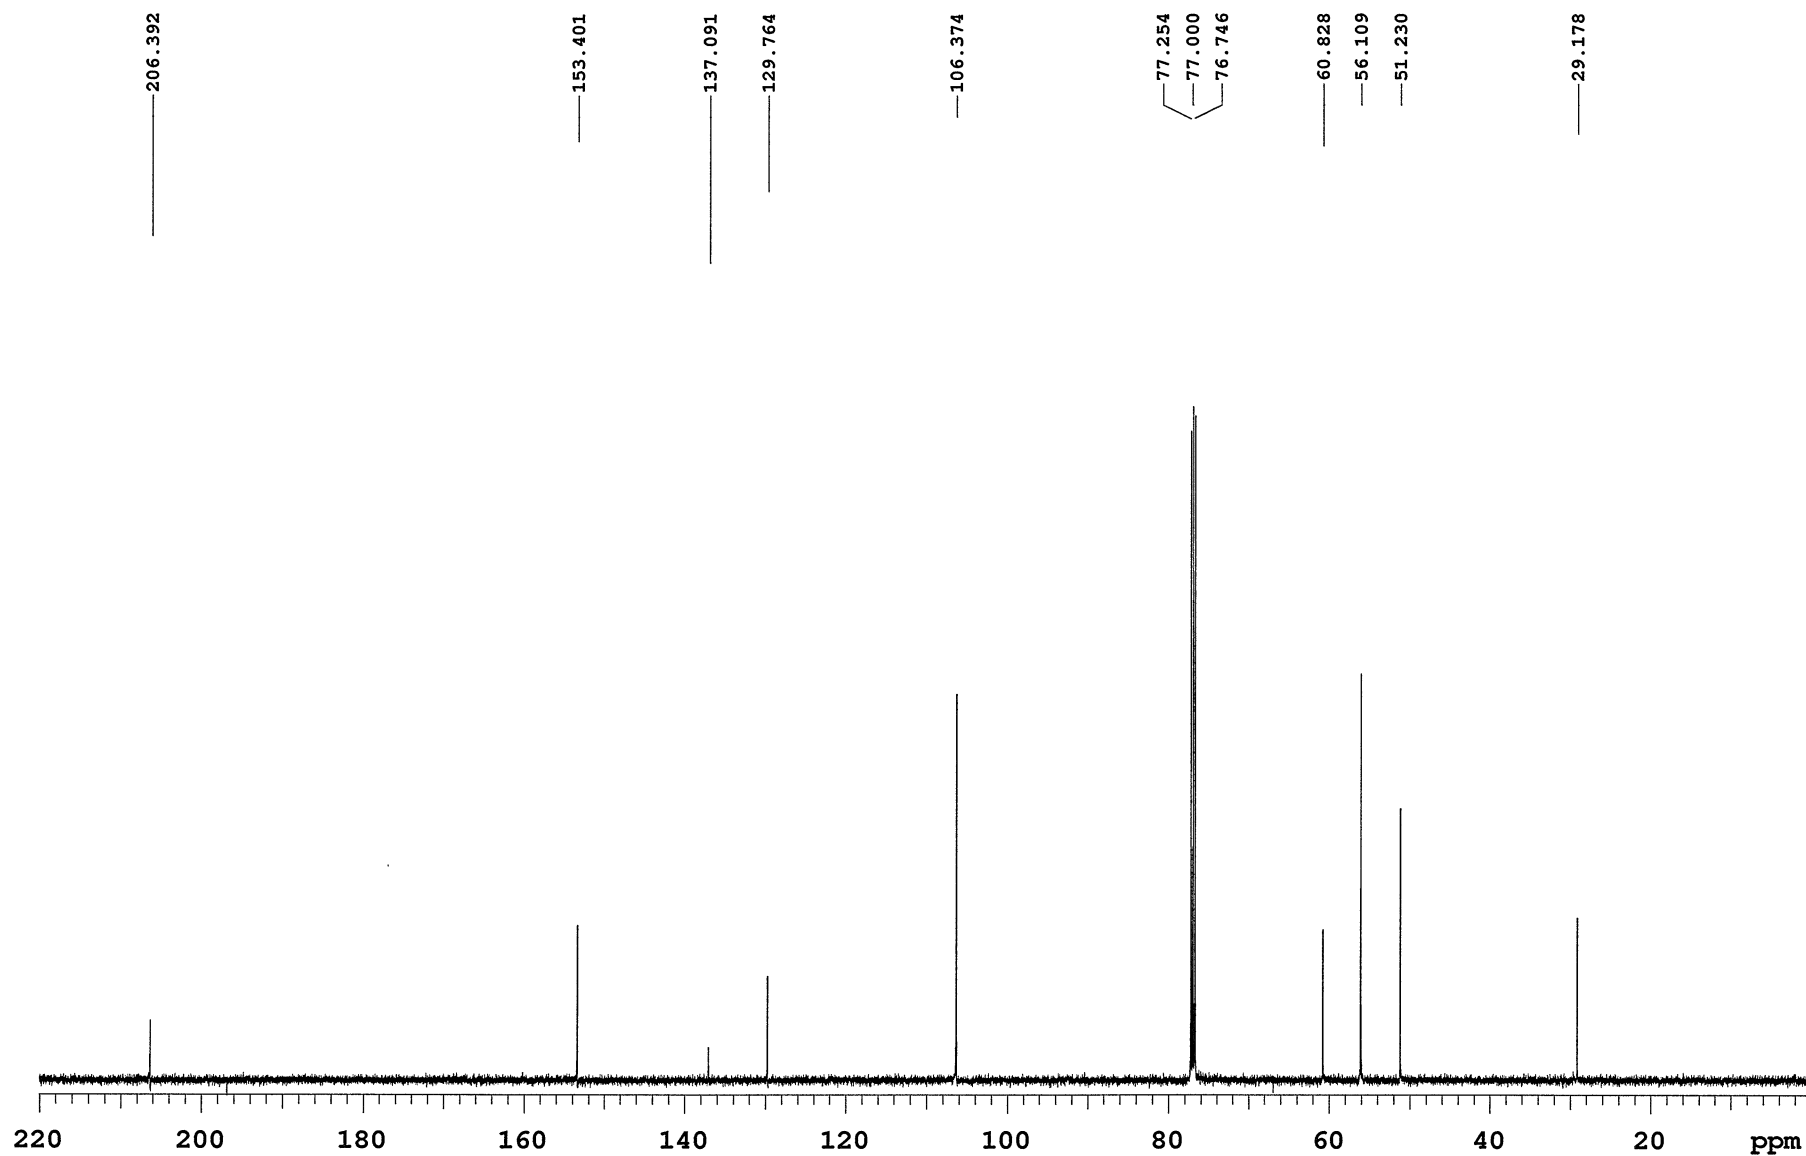

13C NMR (CDCl<sub>3</sub>, 125 MHz) of compound 4o

Sample Name **YYH-102**  
Date collected **2021-07-01**

Pulse sequence **DEPT**  
Solvent **cdcl3**

Temperature **25**  
Spectrometer **Agilent-NMR-inova500**

Study owner **vnmr2**  
Operator **vnmr2**

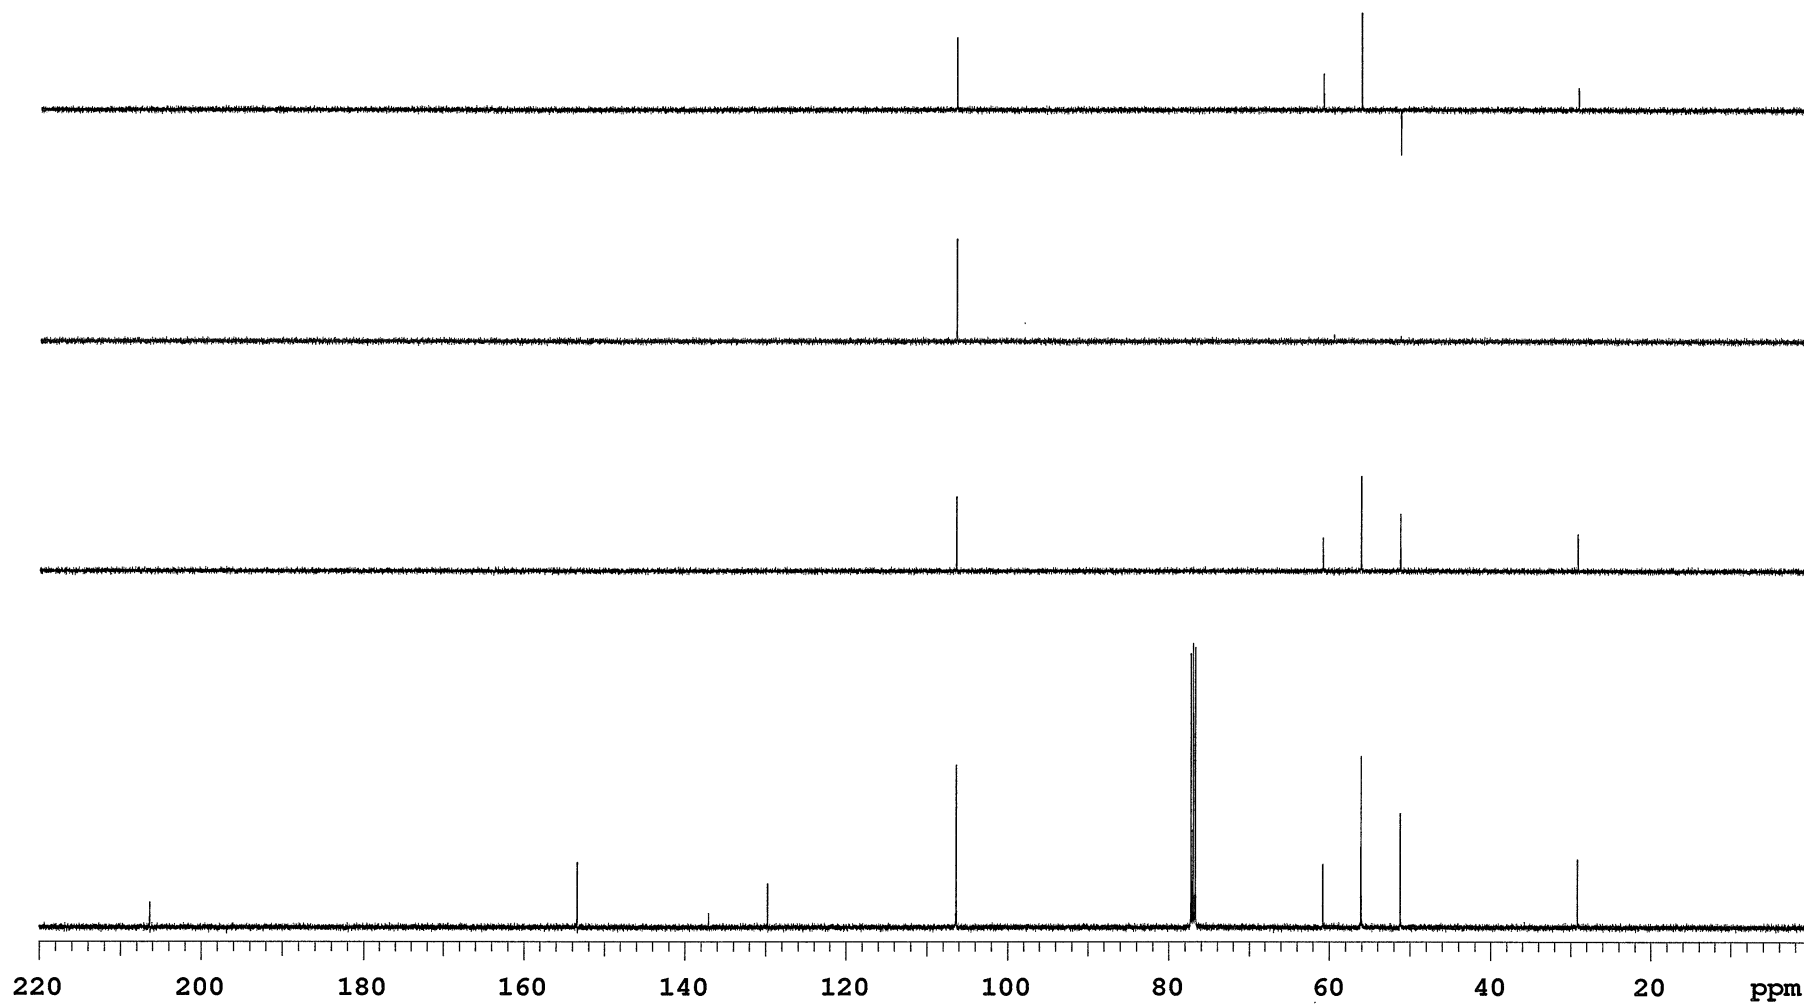

DEPT of compound 4o



Sample Name **YYH-102**  
Date collected **2021-07-01**

Pulse sequence **gHSQC**  
Solvent **cdcl3**

Temperature **25**  
Spectrometer **Agilent-NMR-inova500**

Study owner **vnmr2**  
Operator **vnmr2**

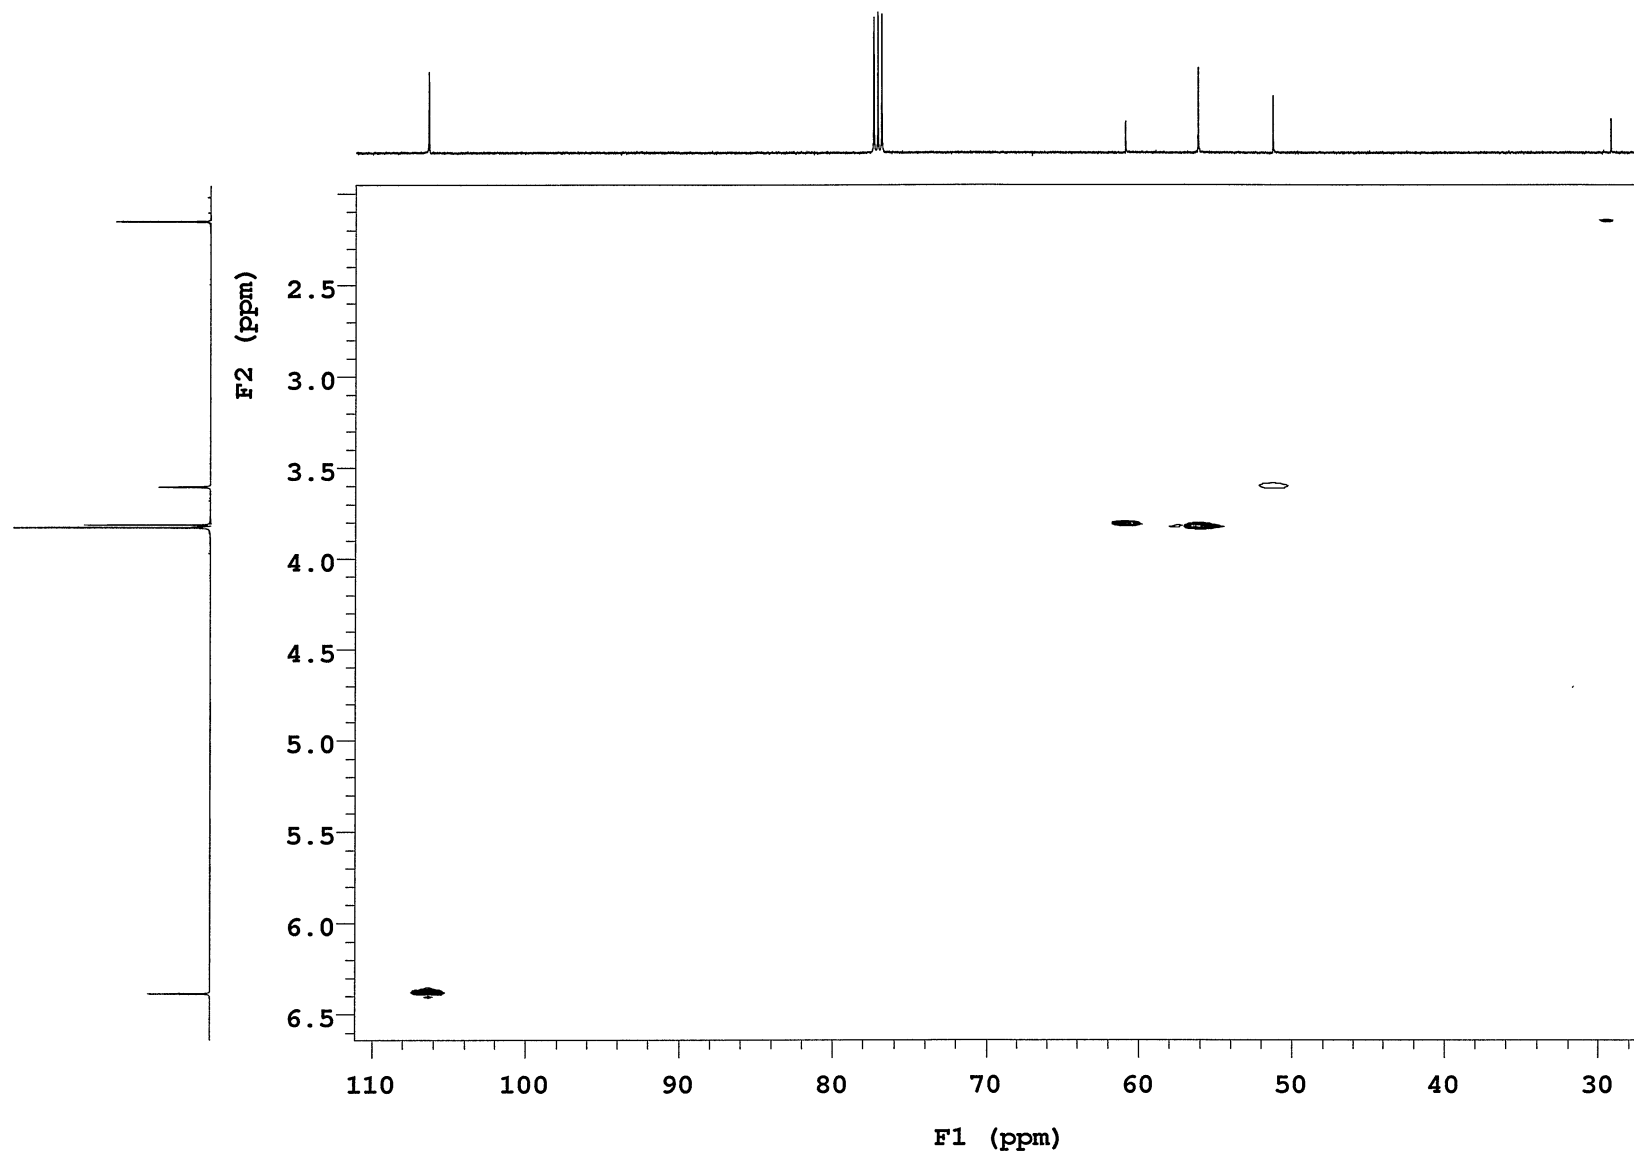HSQC of compound **4o**

Sample Name **YYH-102**  
Date collected **2021-07-01**

Pulse sequence **gCOSY**  
Solvent **cdcl3**

Temperature **25**  
Spectrometer **Agilent-NMR-inova500**

Study owner **vnmr2**  
Operator **vnmr2**

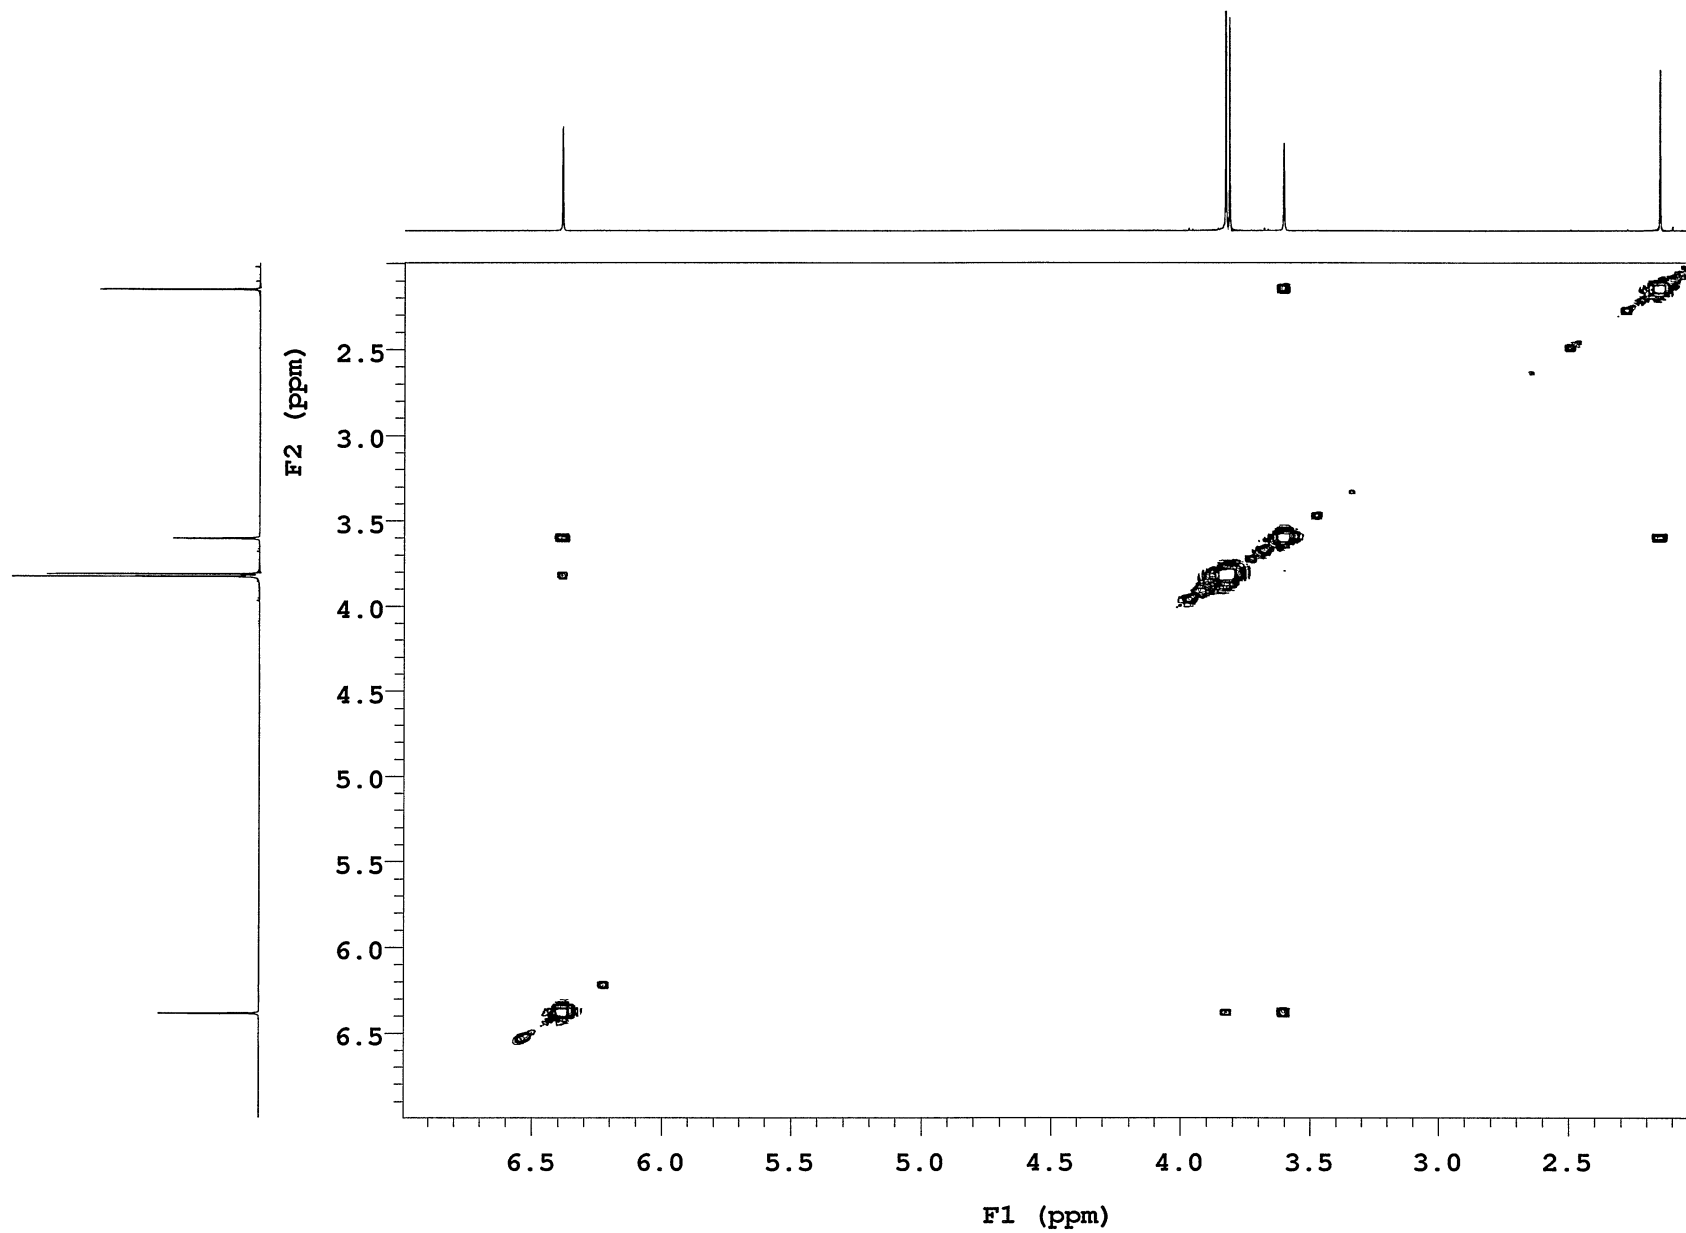

COSY of compound **4o**

Sample Name **YYH-102**  
Date collected **2021-07-01**

Pulse sequence **NOESY**  
Solvent **cdcl3**

Temperature **25**  
Spectrometer **Agilent-NMR-inova500**

Study owner **vnmr2**  
Operator **vnmr2**

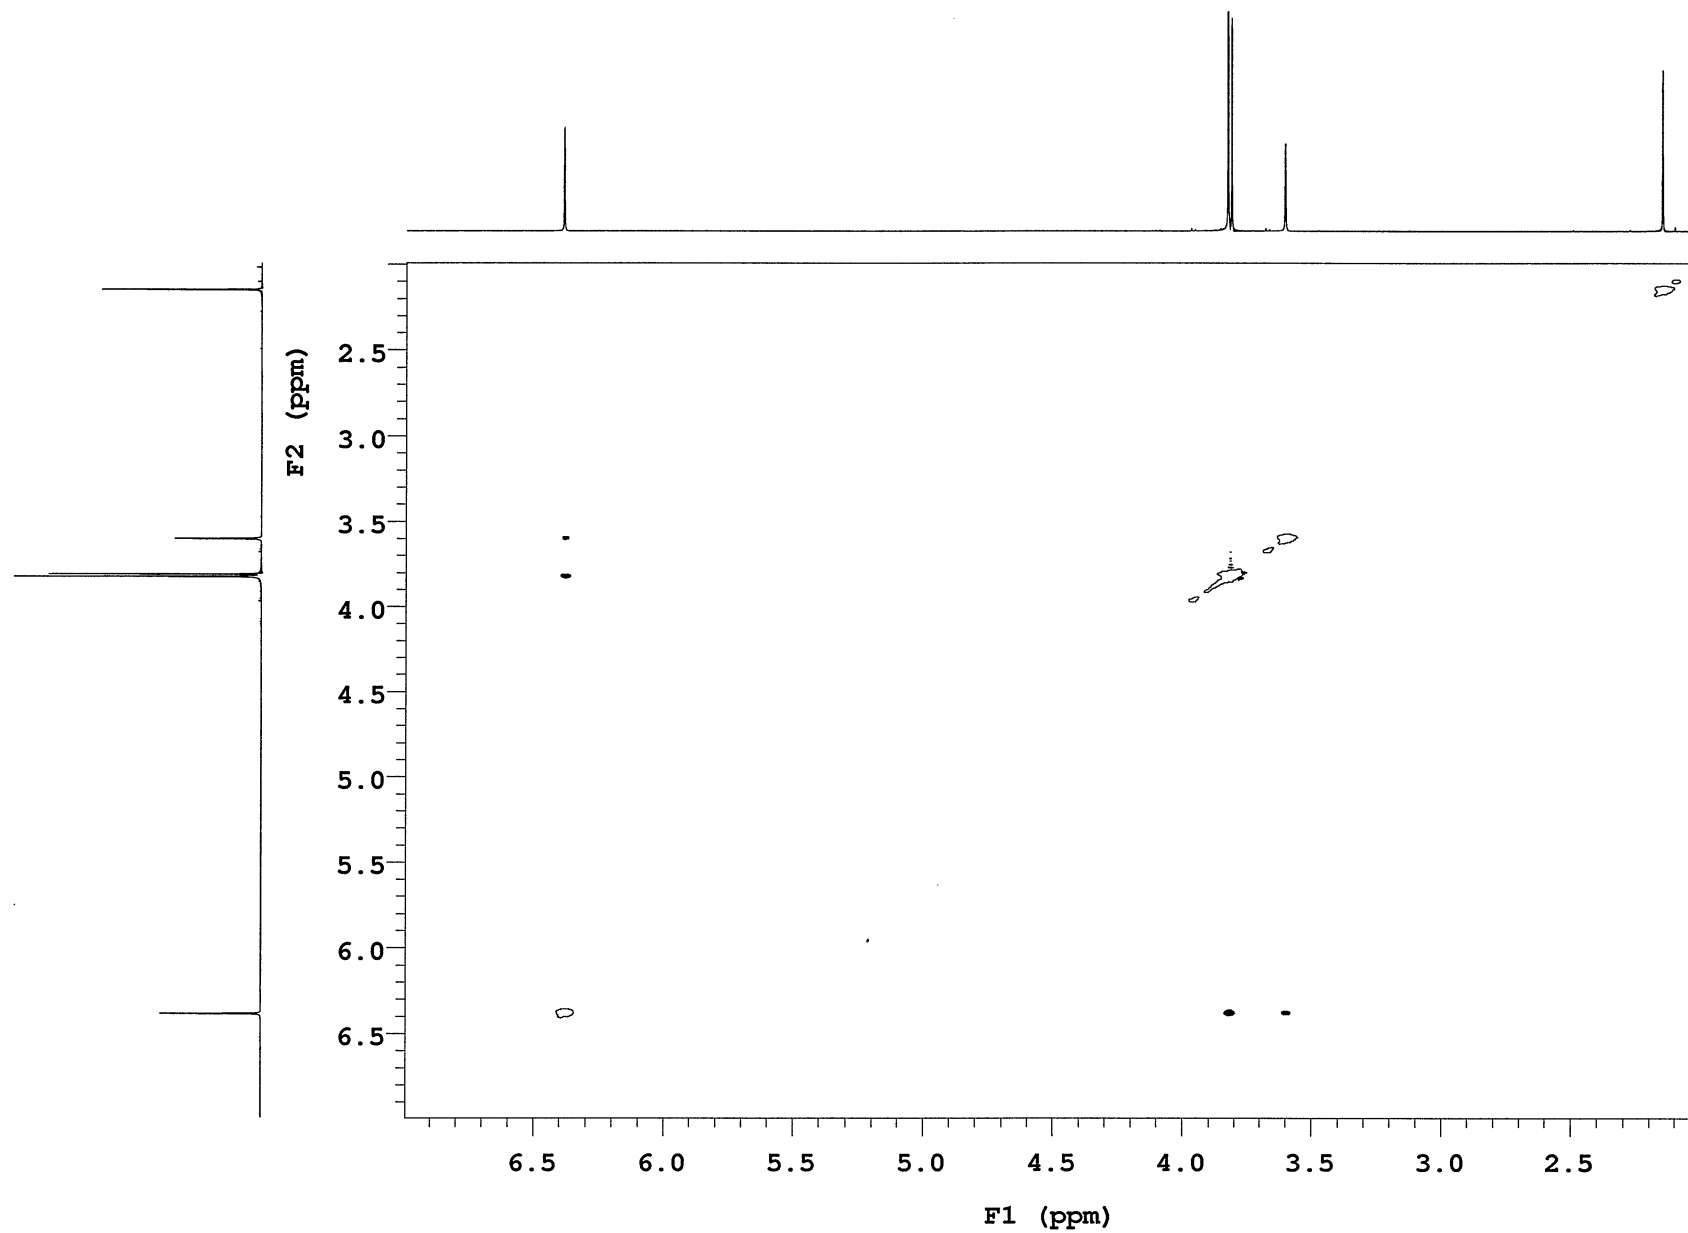NOESY of compound **4o**

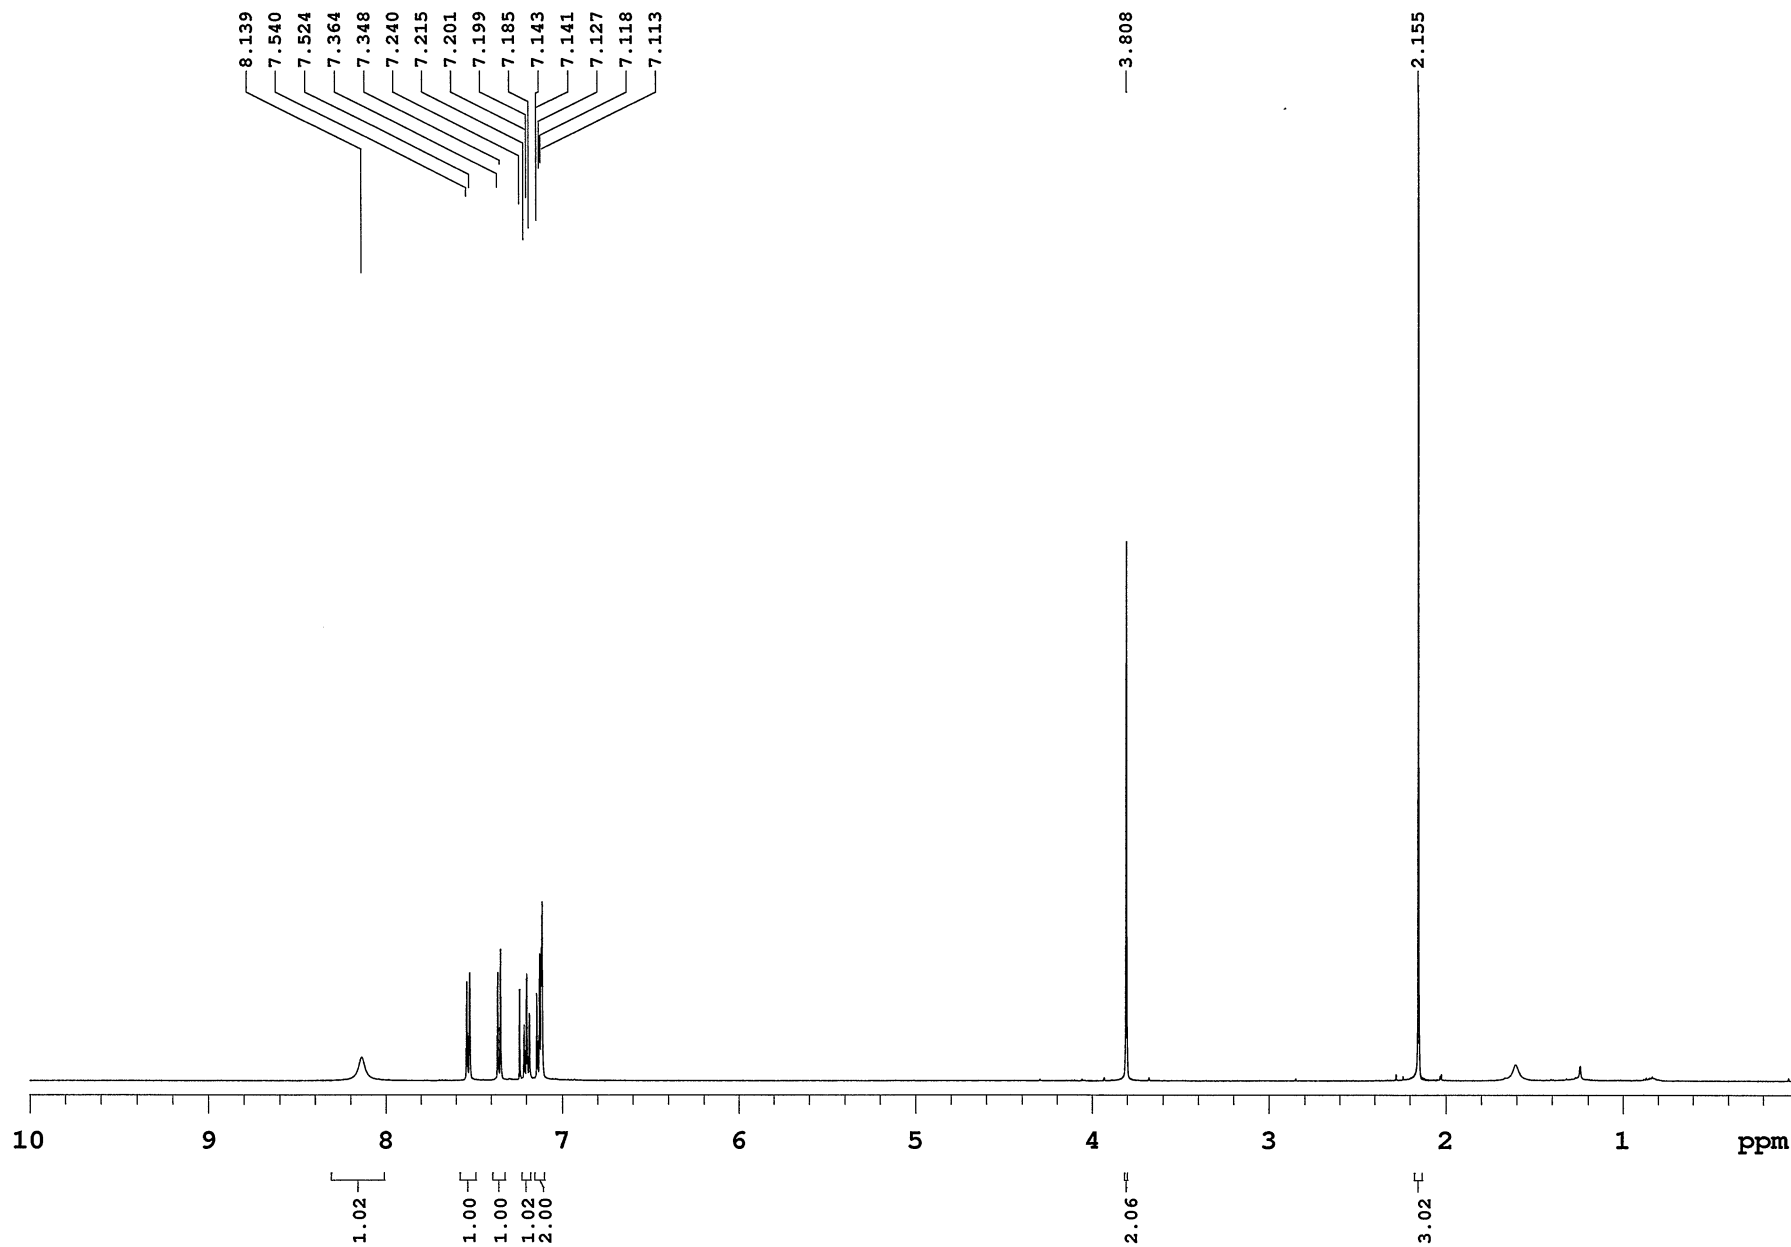

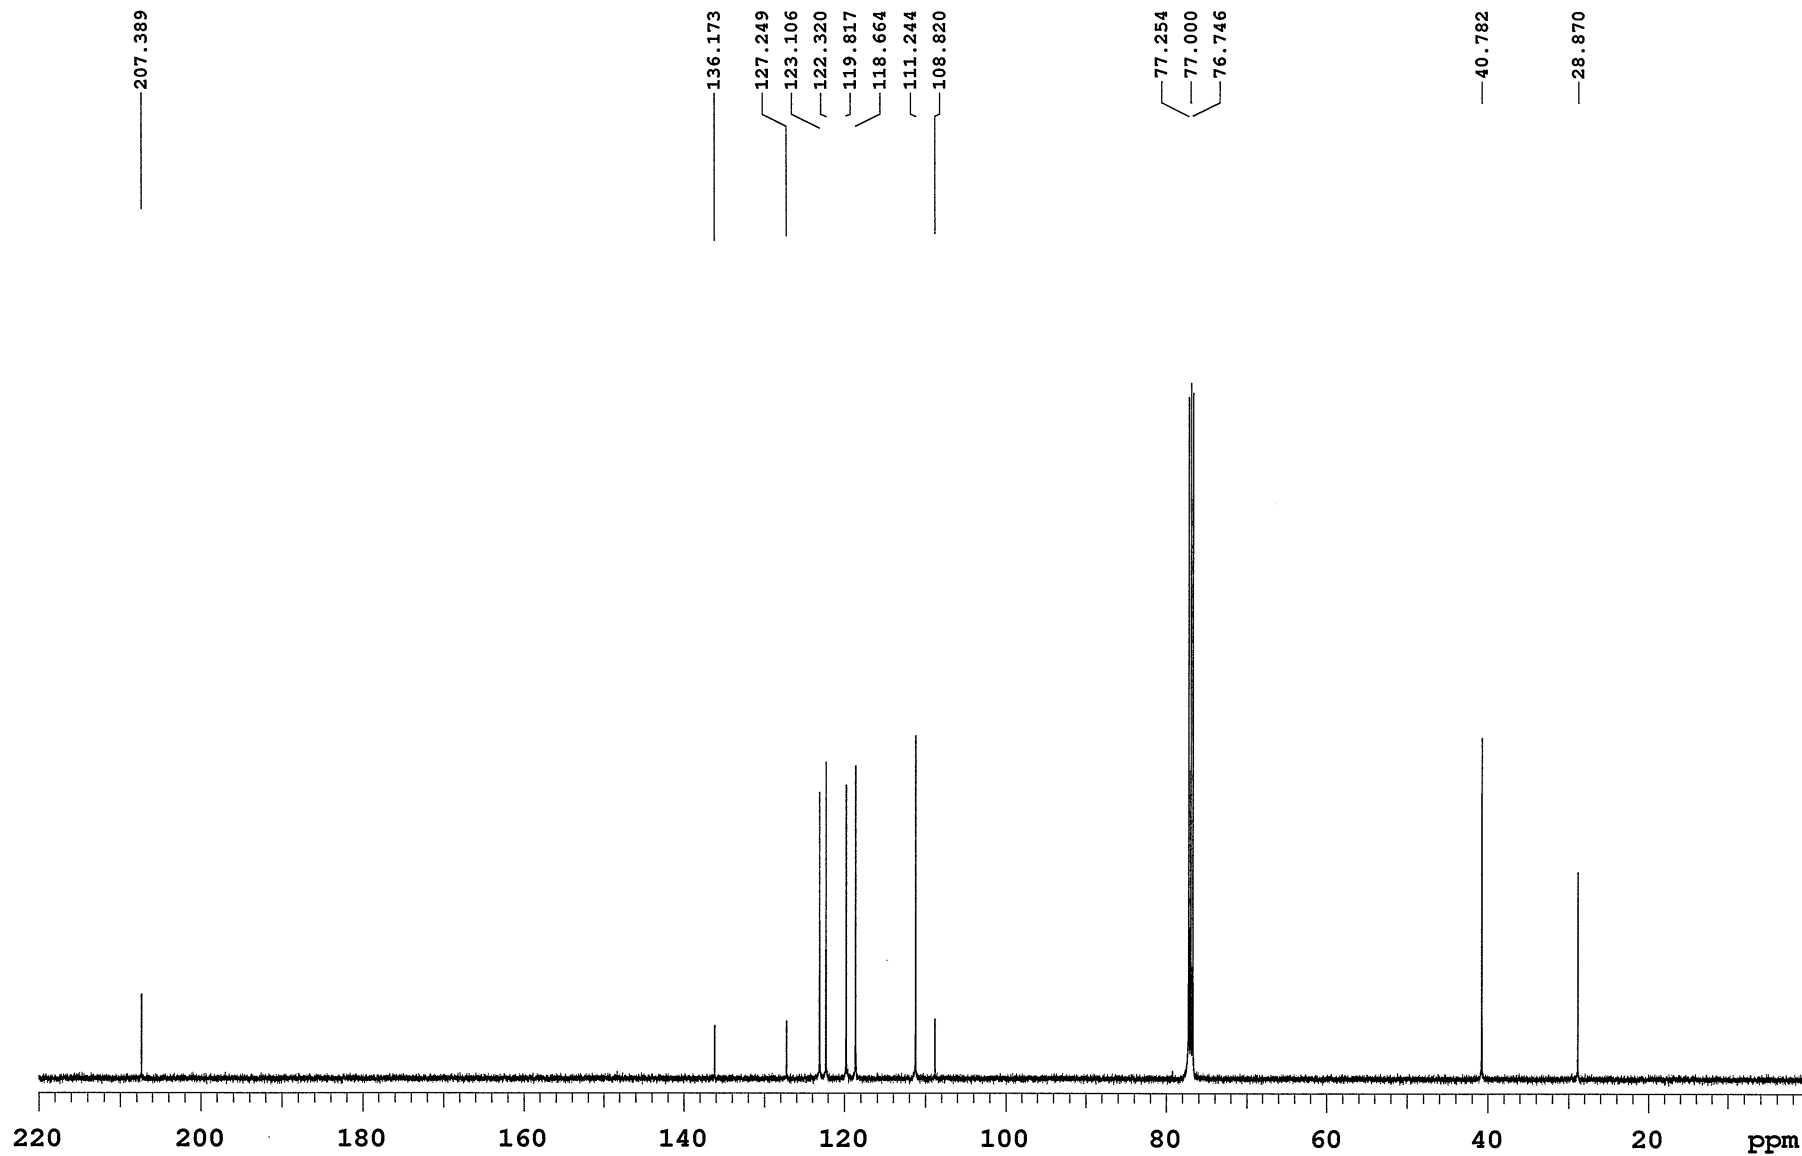

13C NMR (CDCl3, 125 MHz) of compound 4p

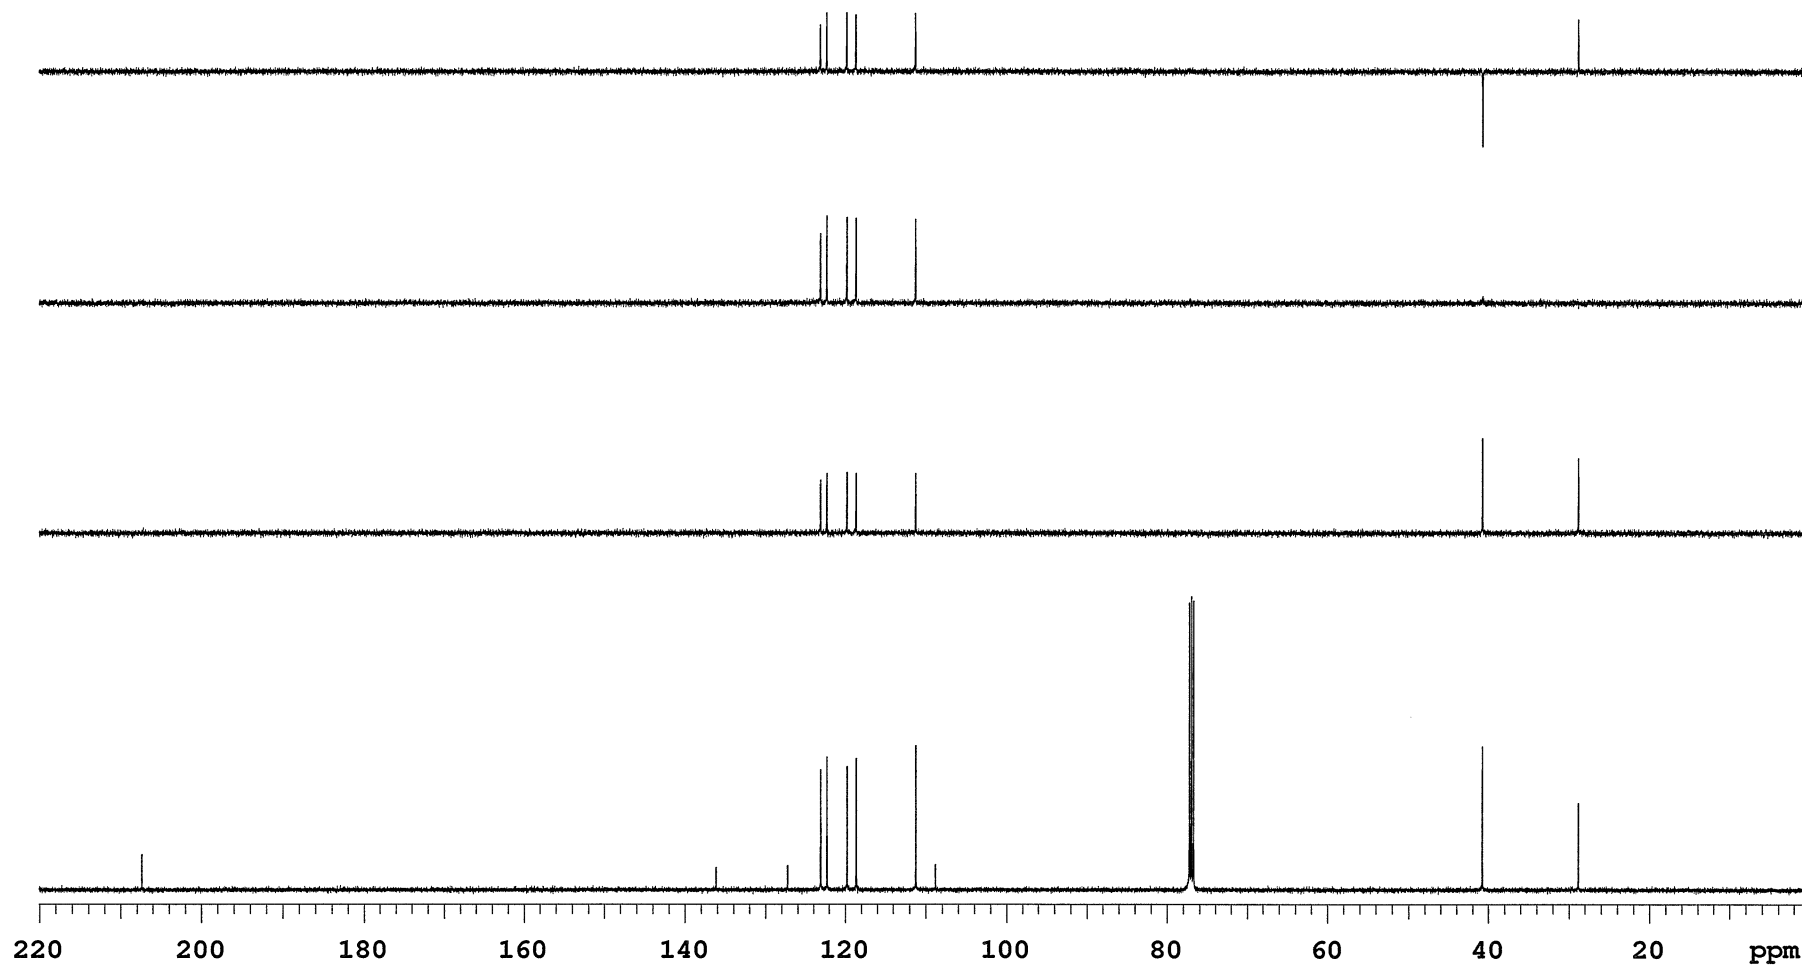

DEPT of compound 4p

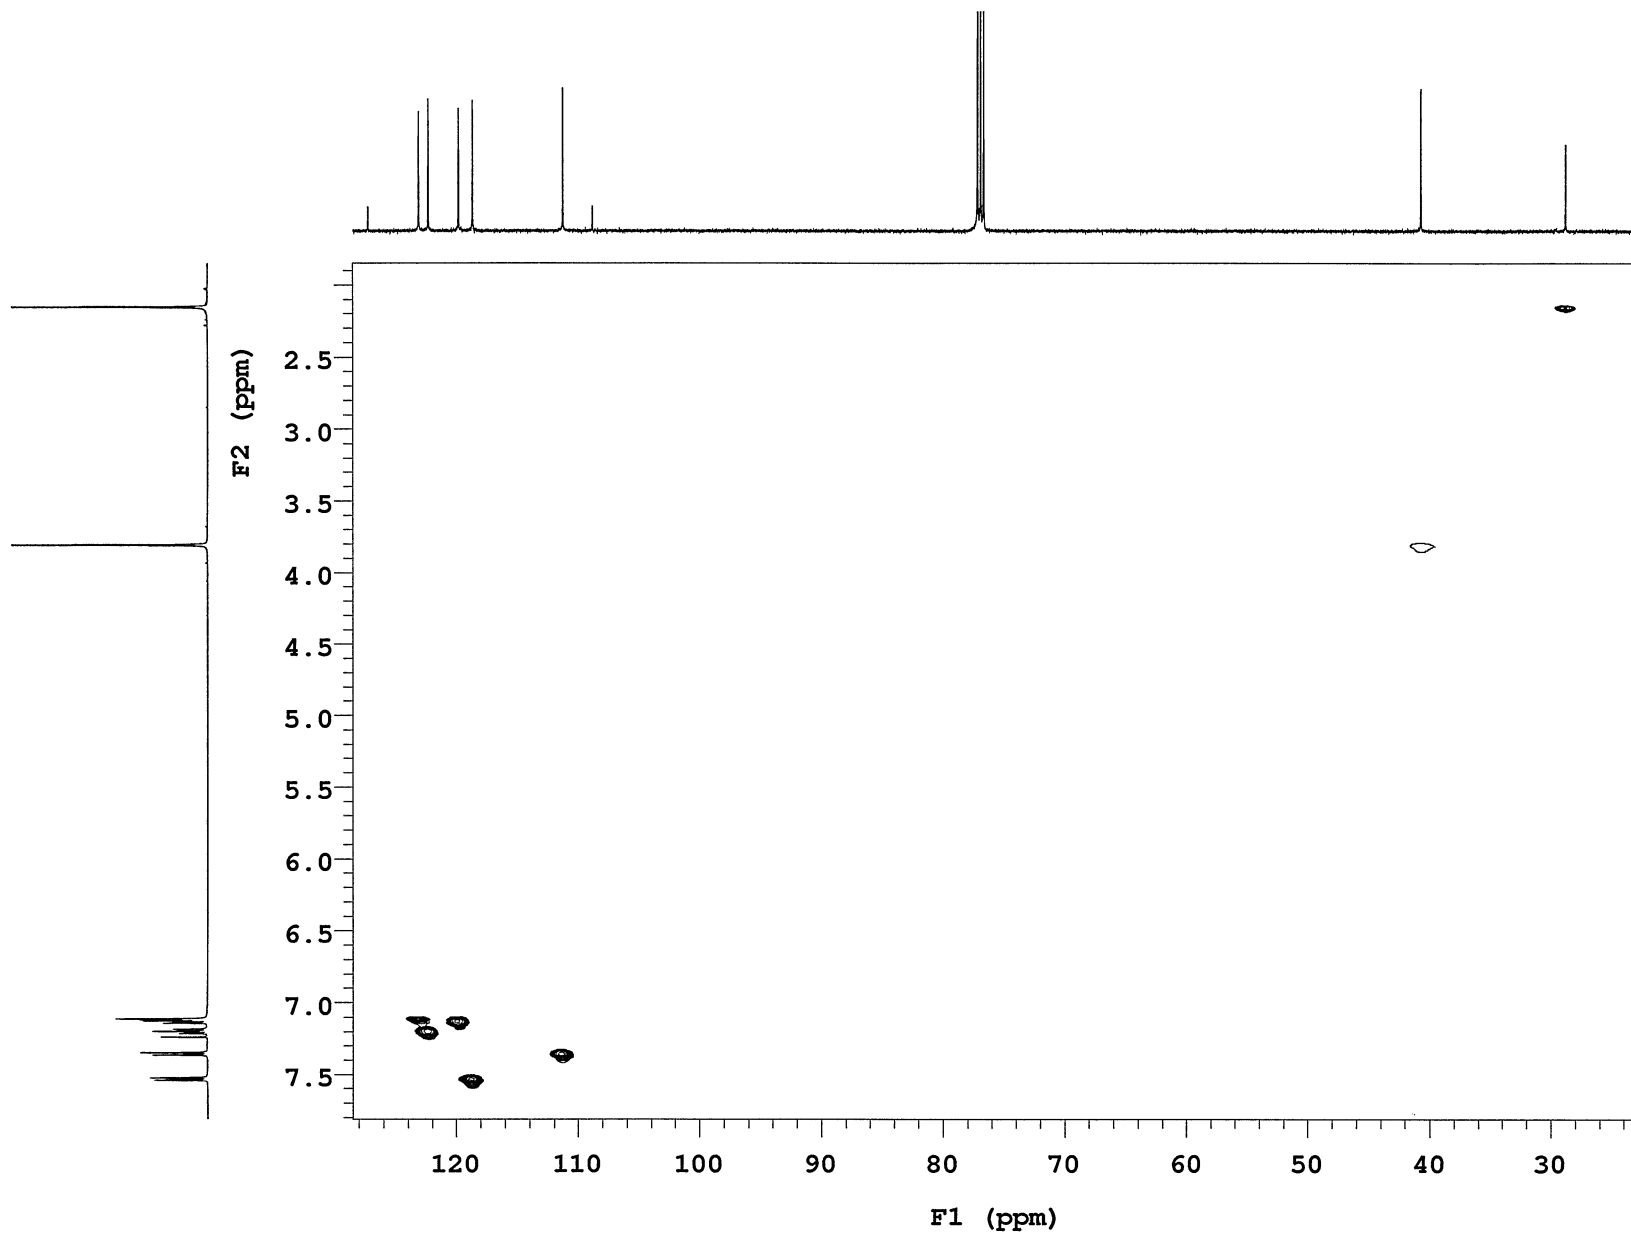HSQC of compound **4p**

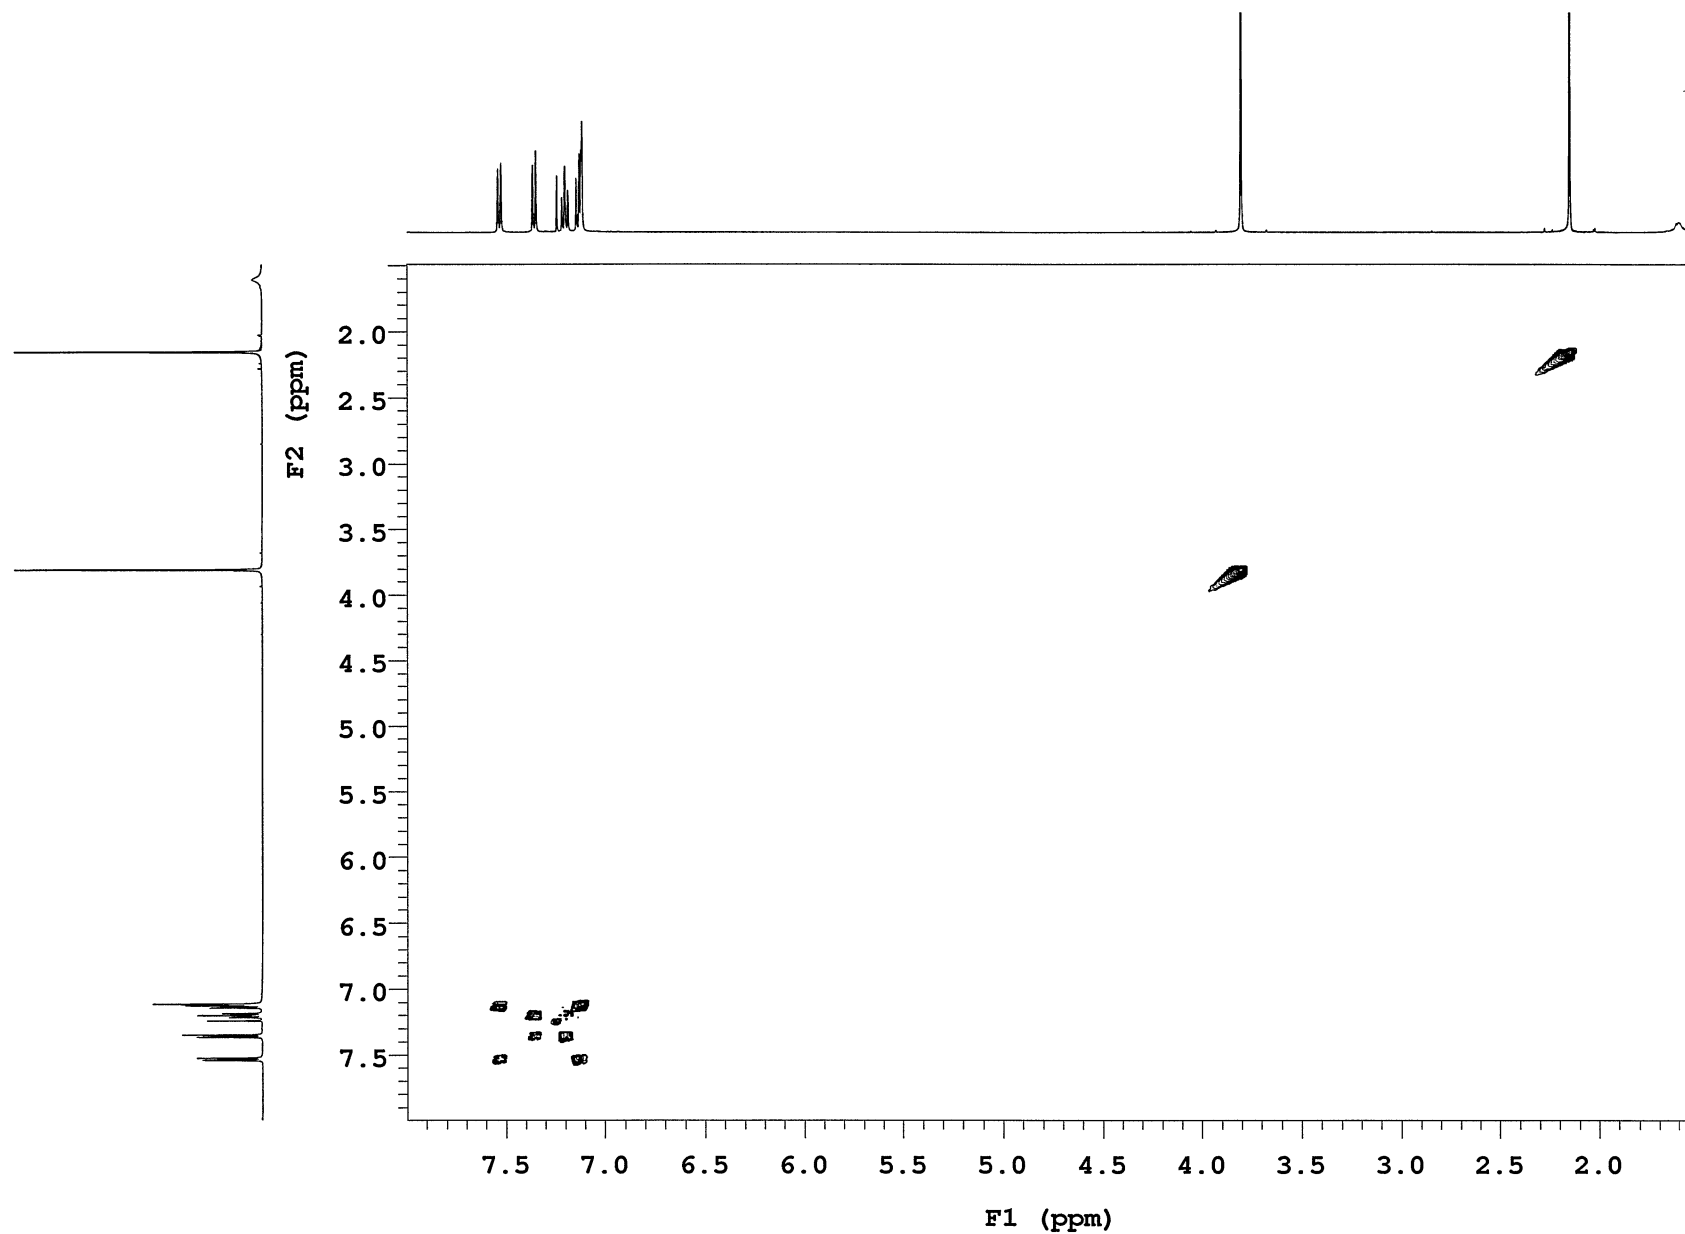COSY of compound **4p**



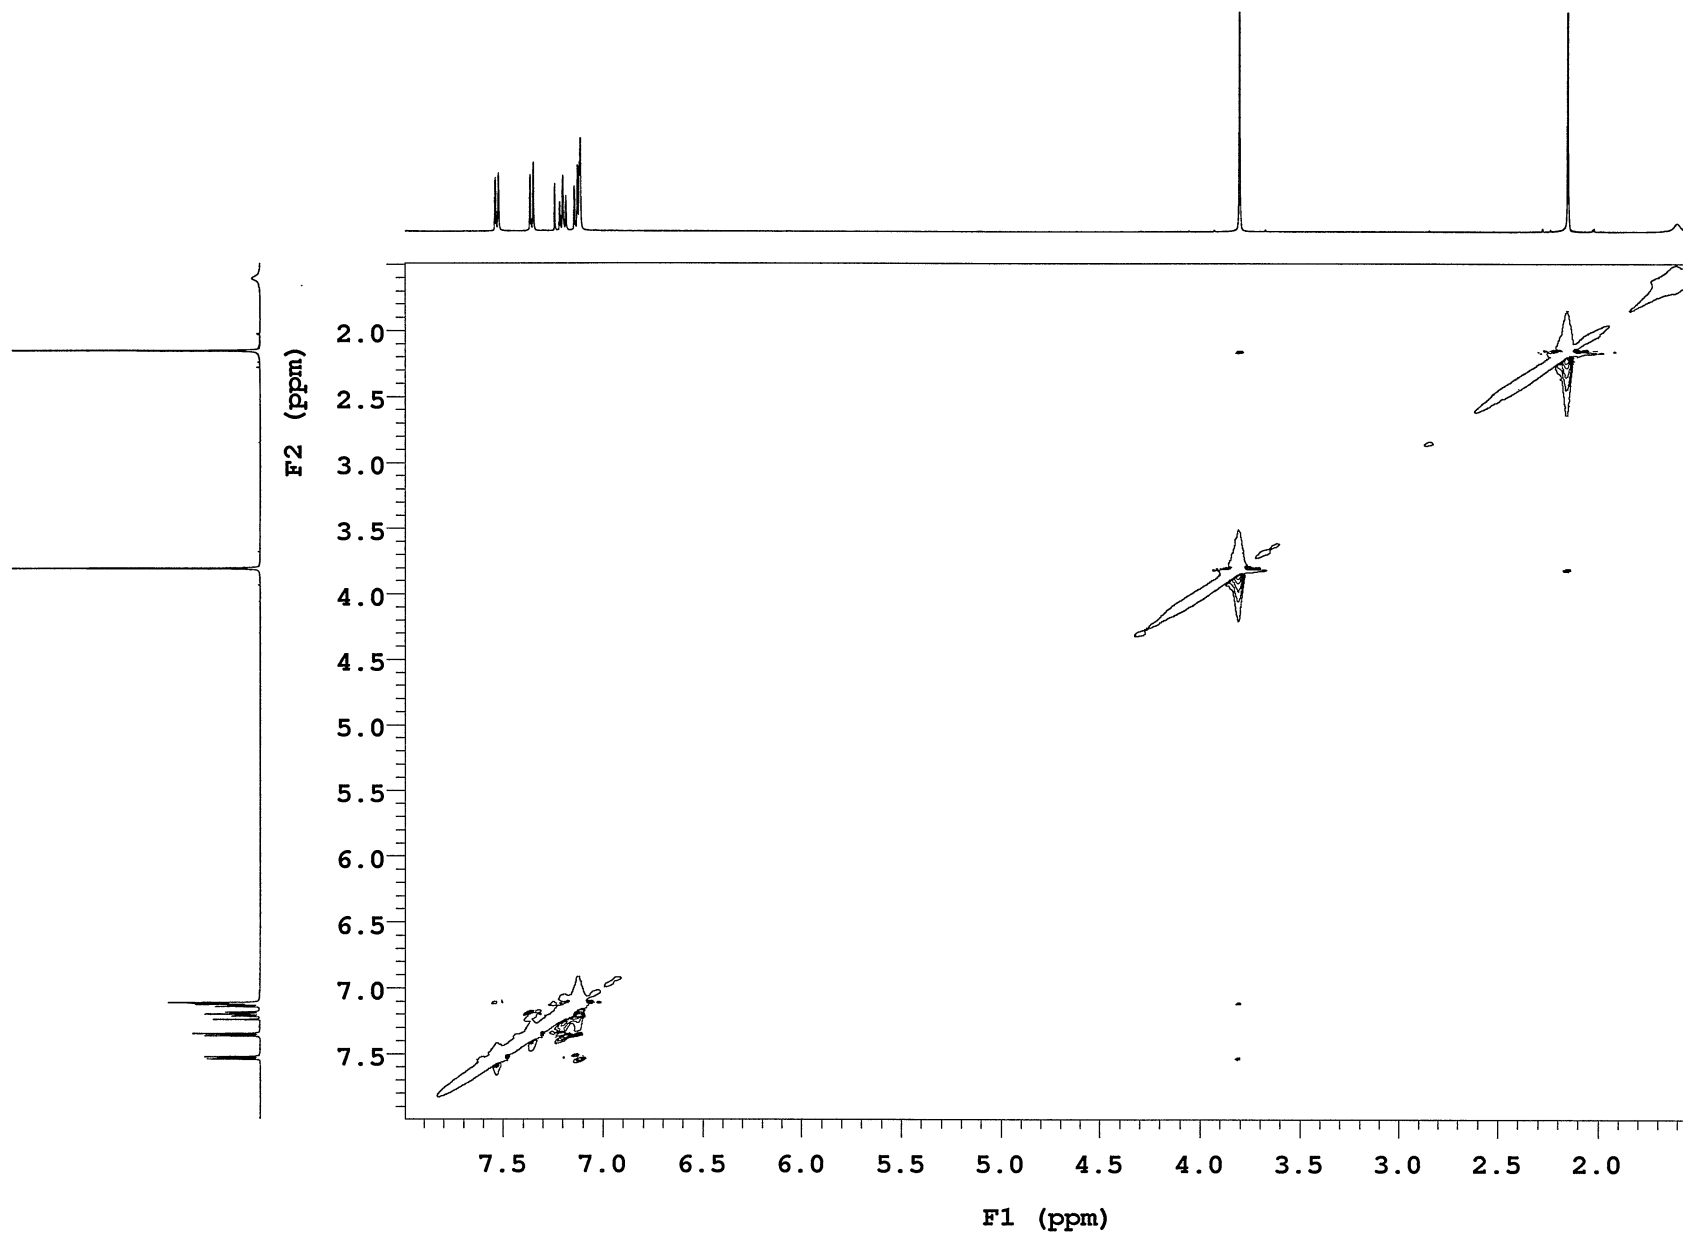

NOESY of compound 4p

YYH-105

S150

Sample Name YYH-105  
Date collected 2021-08-26Pulse sequence PROTON  
Solvent cdcl3Temperature 25  
Spectrometer Agilent-NMR-inova500Study owner vnmr2  
Operator vnmr2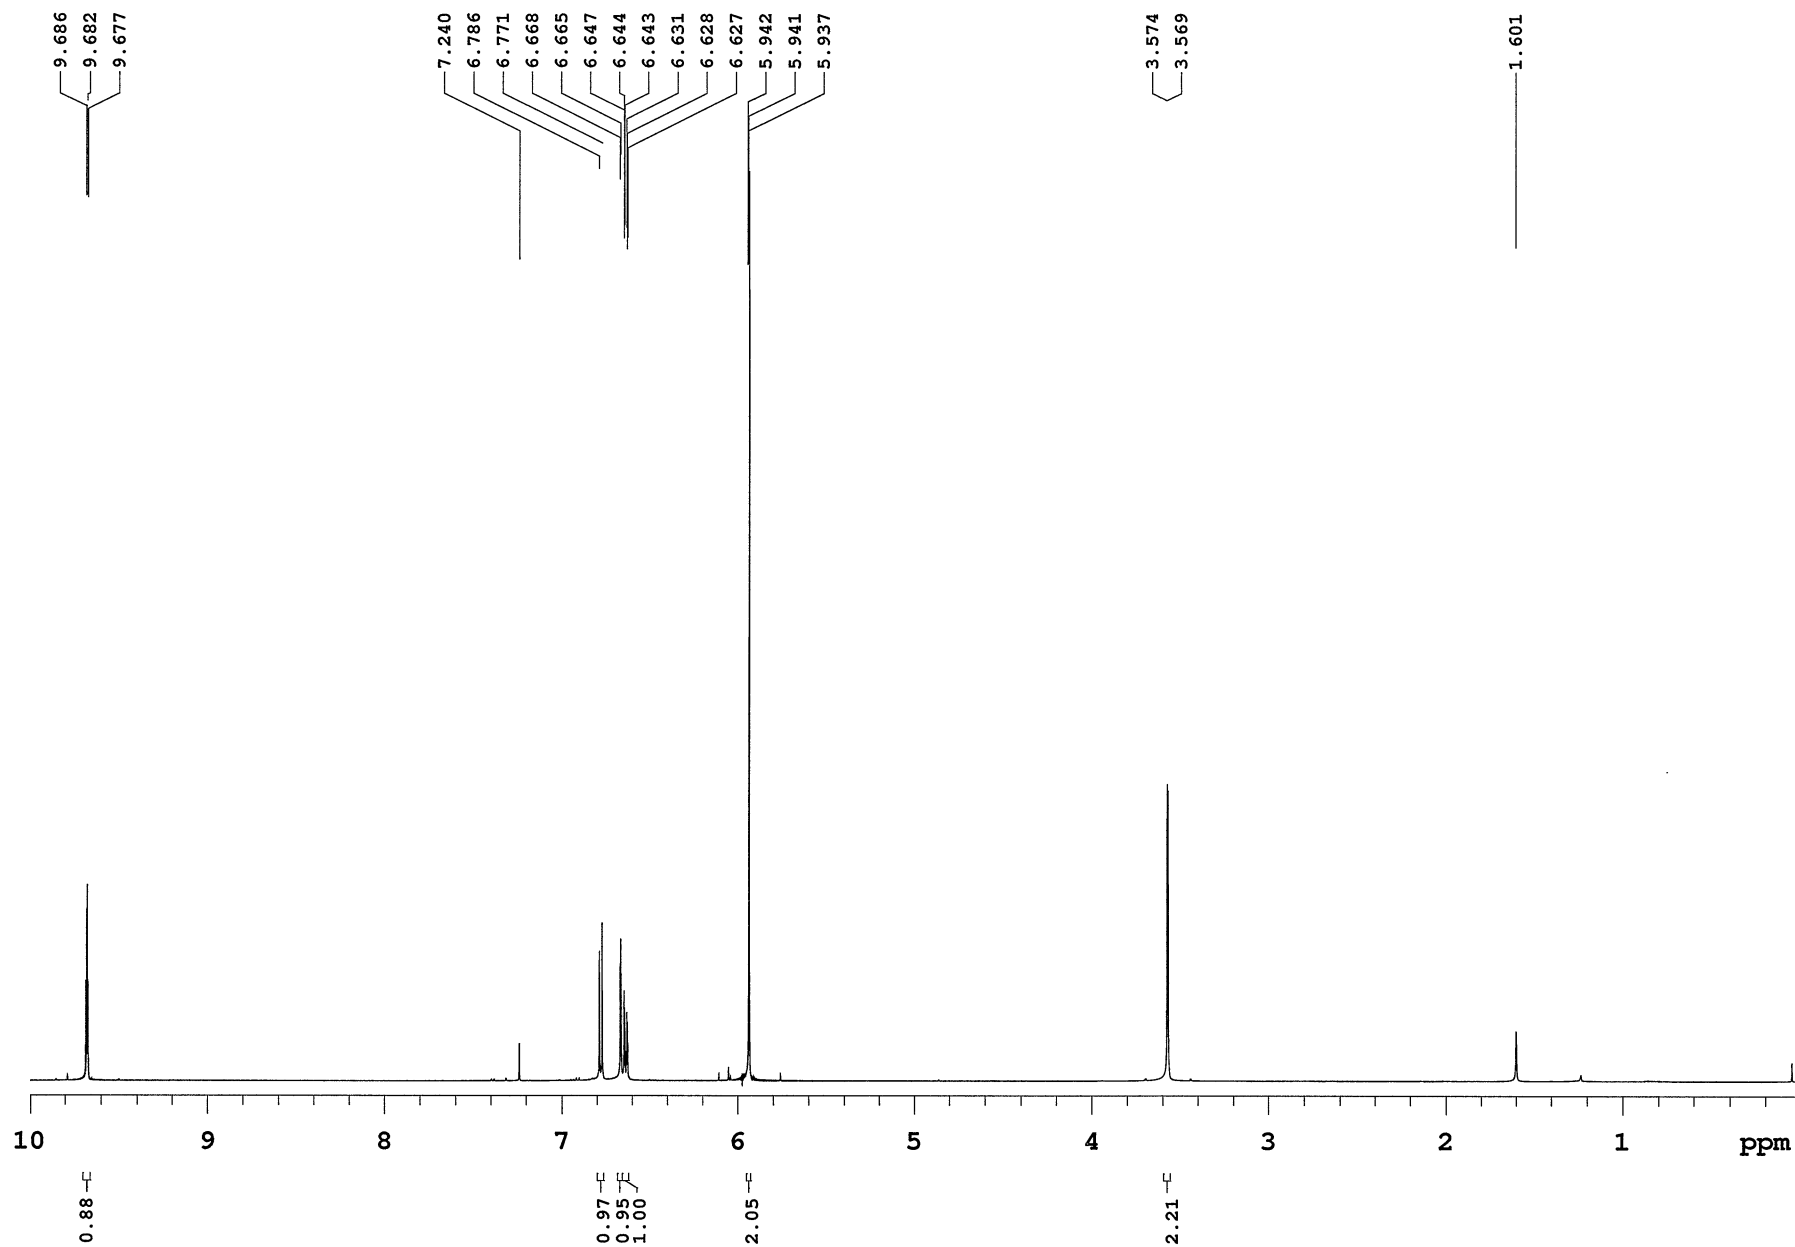

Sample Name YYH-105  
Date collected 2021-08-26

Pulse sequence CARBON  
Solvent cdcl3

Temperature 25  
Spectrometer Agilent-NMR-inova500

Study owner vnmr2  
Operator vnmr2

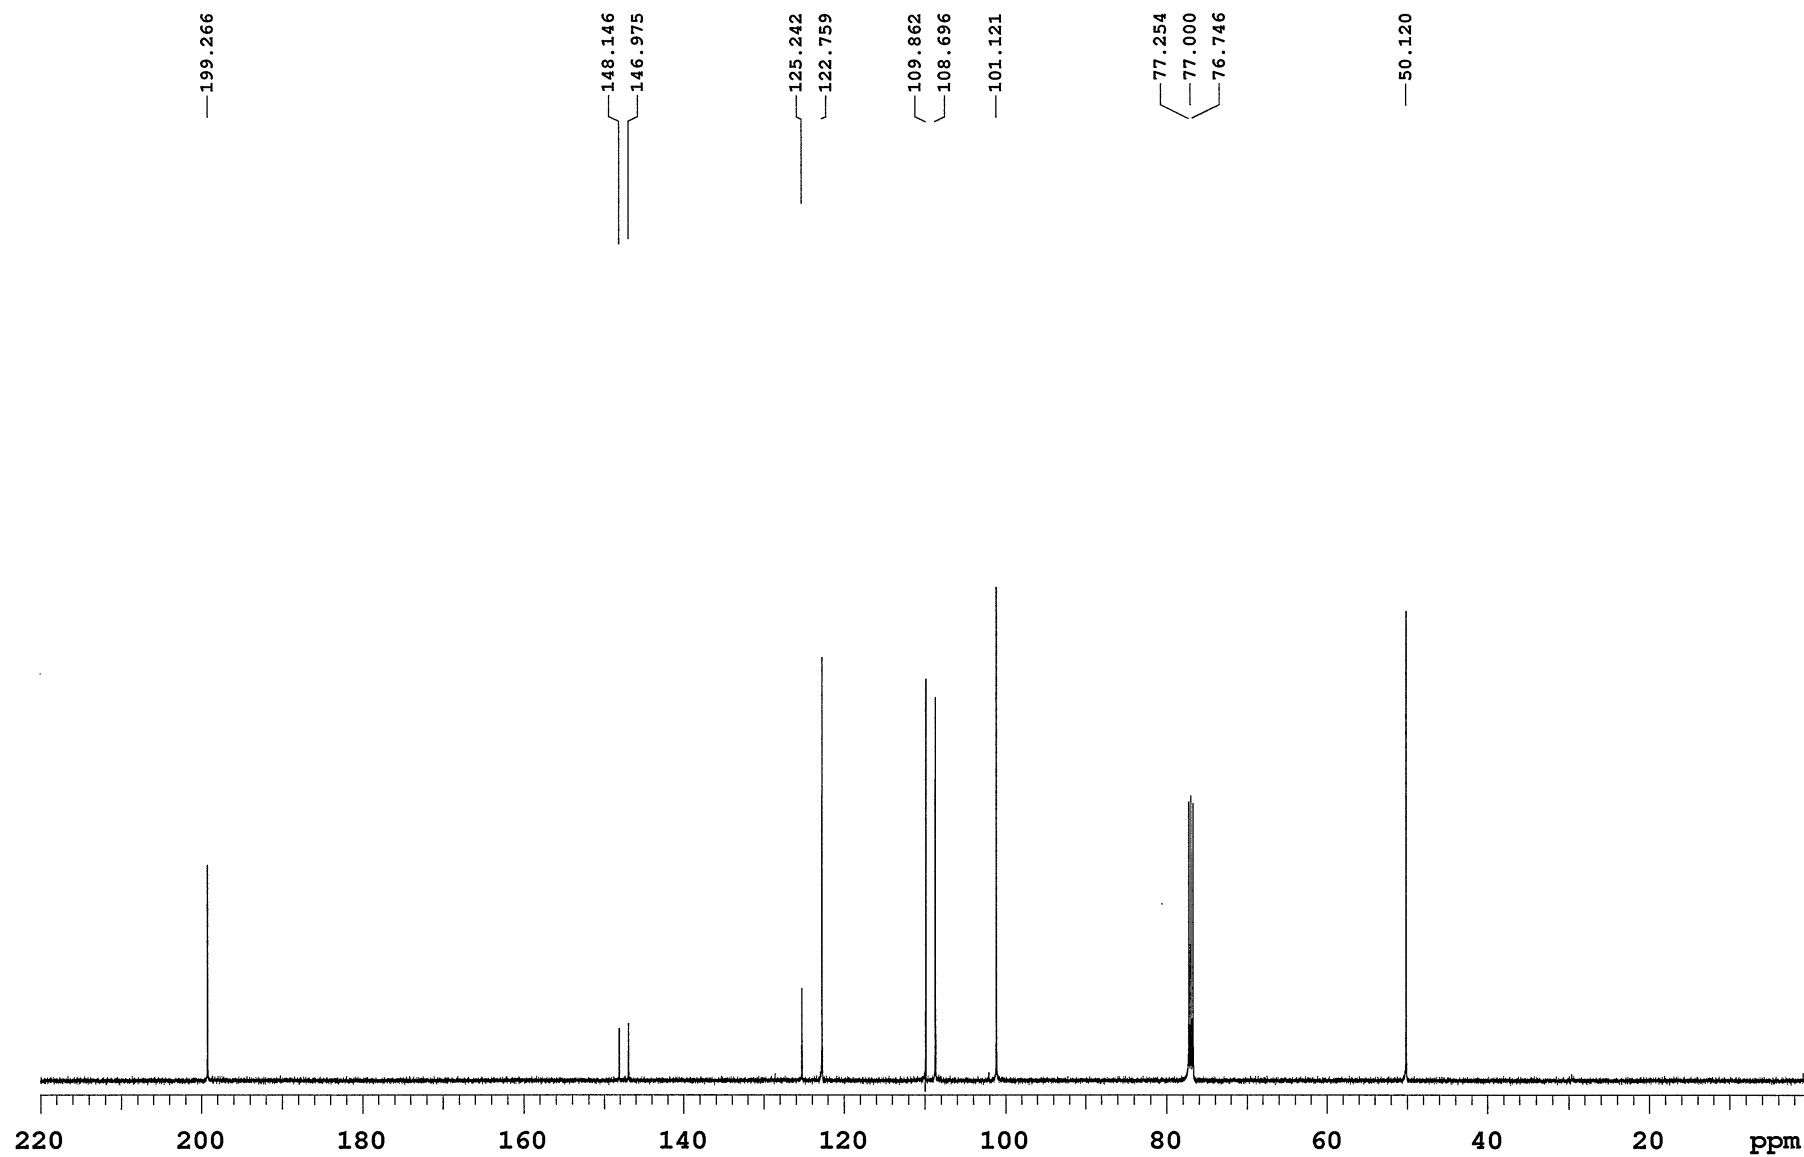

13C NMR (CDCl<sub>3</sub>, 125 MHz) of compound 4q

Sample Name **YYH-105**  
Date collected **2021-08-26**

Pulse sequence **DEPT**  
Solvent **cdcl3**

Temperature **25**  
Spectrometer **Agilent-NMR-inova500**

Study owner **vnmr2**  
Operator **vnmr2**

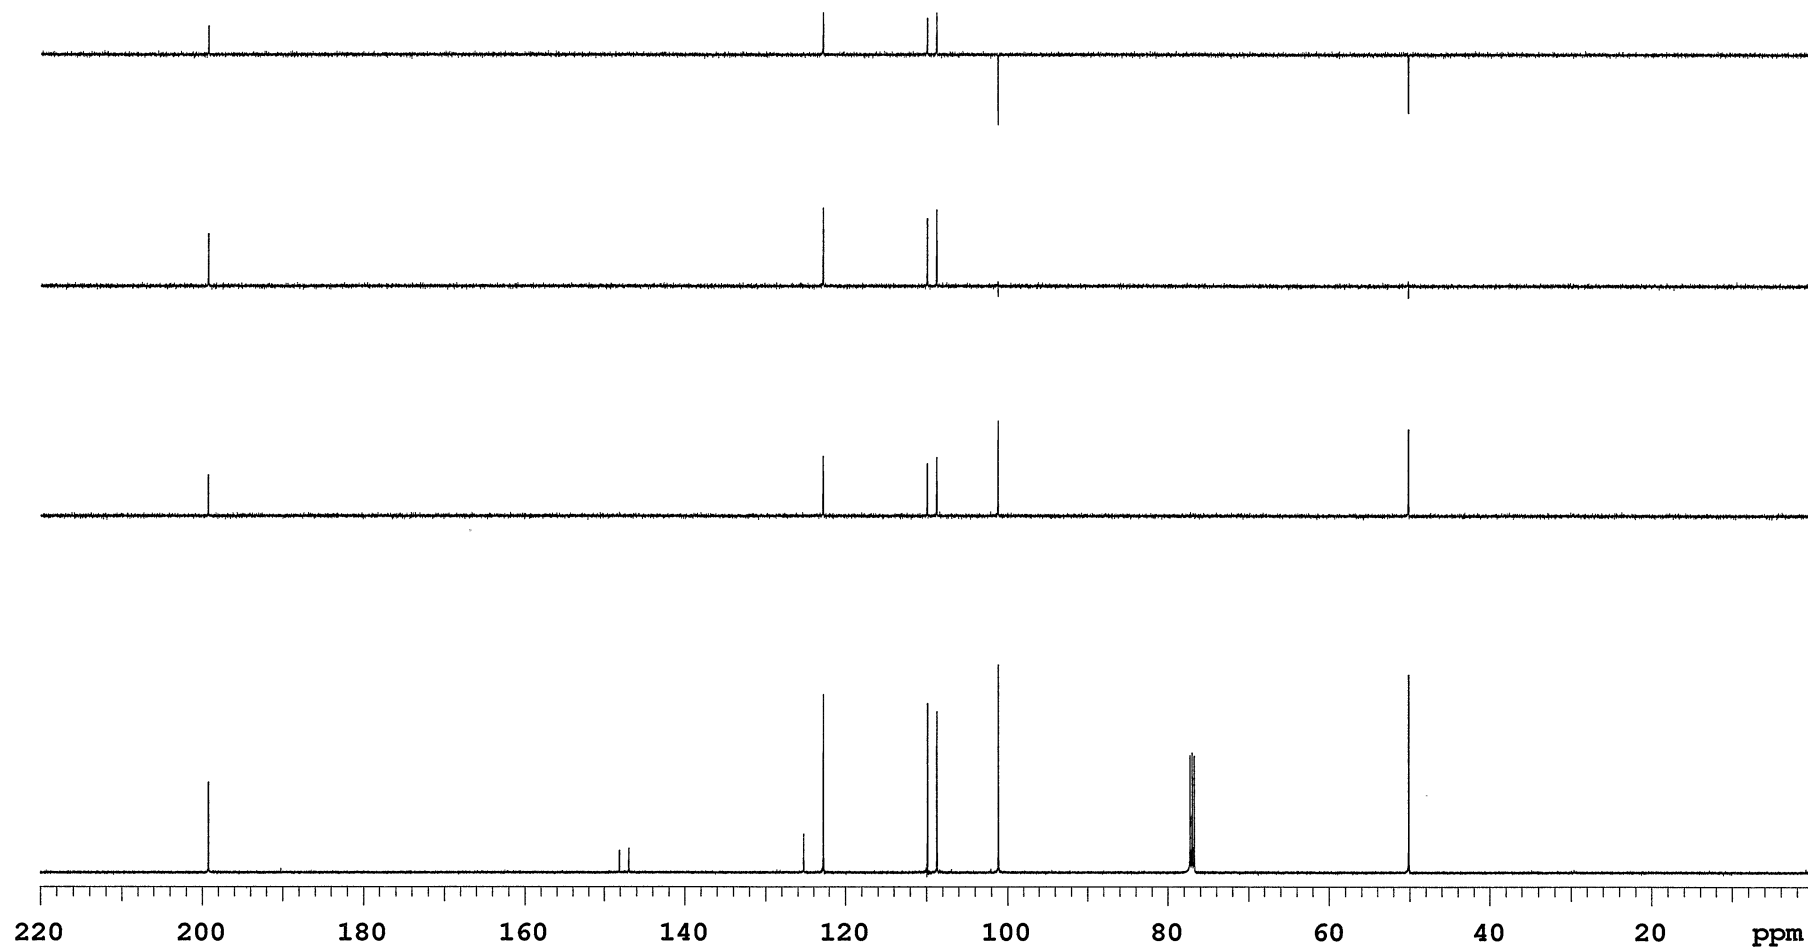DEPT of compound **4q**

Sample Name YYH-105  
Date collected 2021-08-27

Pulse sequence gHSQC  
Solvent cdcl3

Temperature 25  
Spectrometer Agilent-NMR-inova500

Study owner vnmr2  
Operator vnmr2

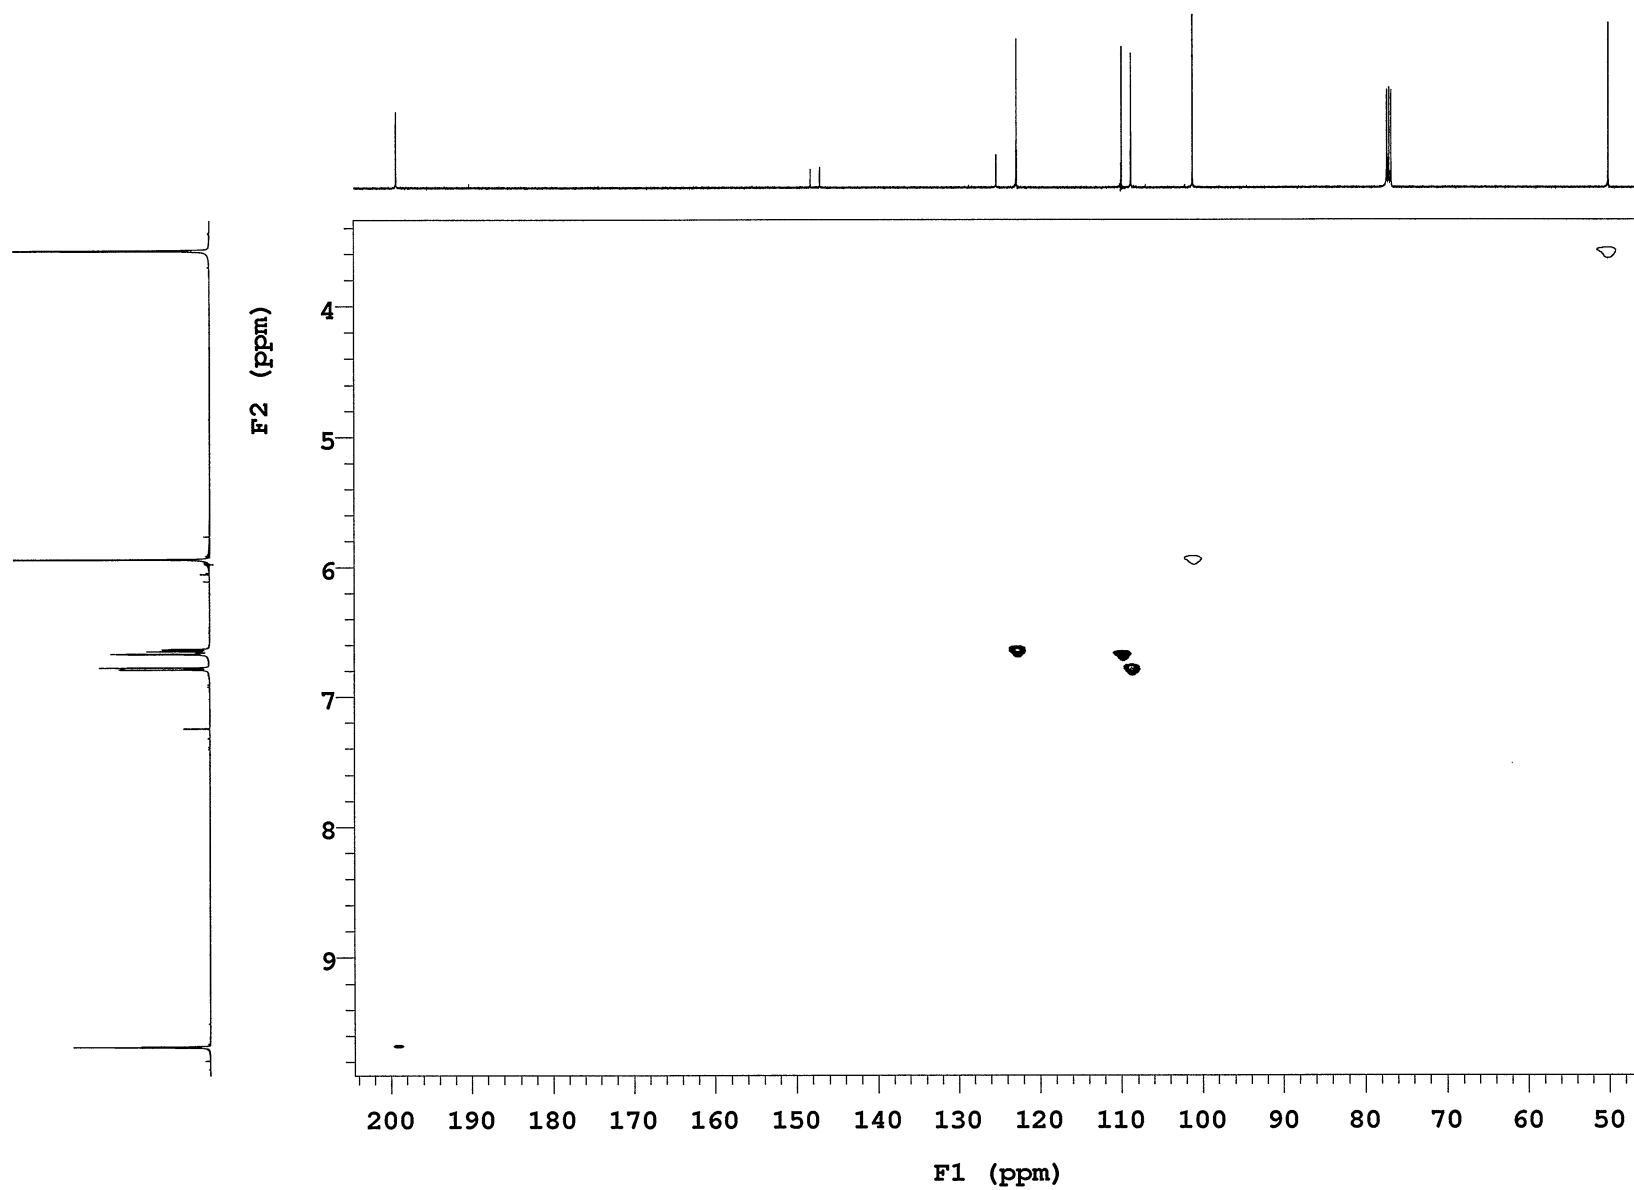

HSQC of compound 4q

Sample Name YYH-105  
Date collected 2021-08-27

Pulse sequence gCOSY  
Solvent cdcl3

Temperature 25  
Spectrometer Agilent-NMR-inova500

Study owner vnmr2  
Operator vnmr2

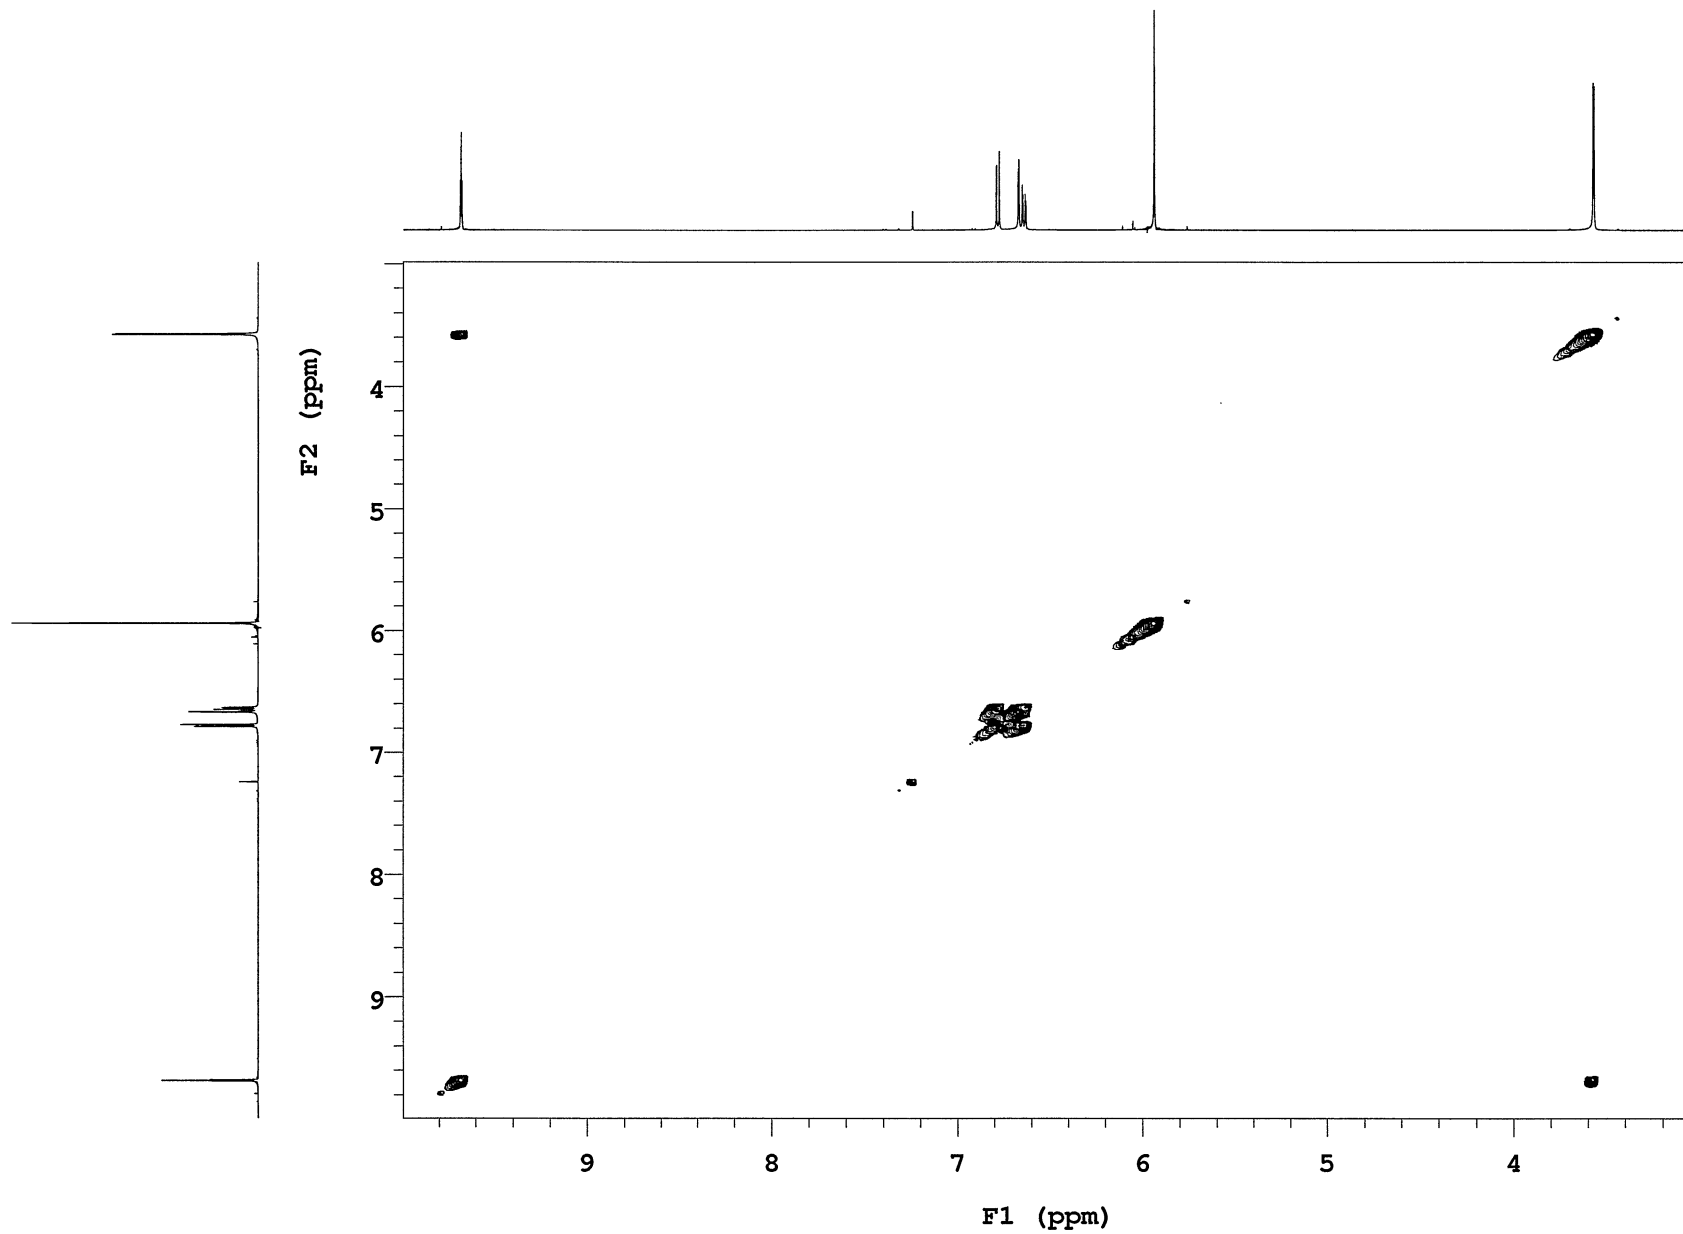

COSY of compound 4q

Sample Name **YYH-105**  
Date collected **2021-08-27**

Pulse sequence **NOESY**  
Solvent **cdcl3**

Temperature **25**  
Spectrometer **Agilent-NMR-inova500**

Study owner **vnmr2**  
Operator **vnmr2**

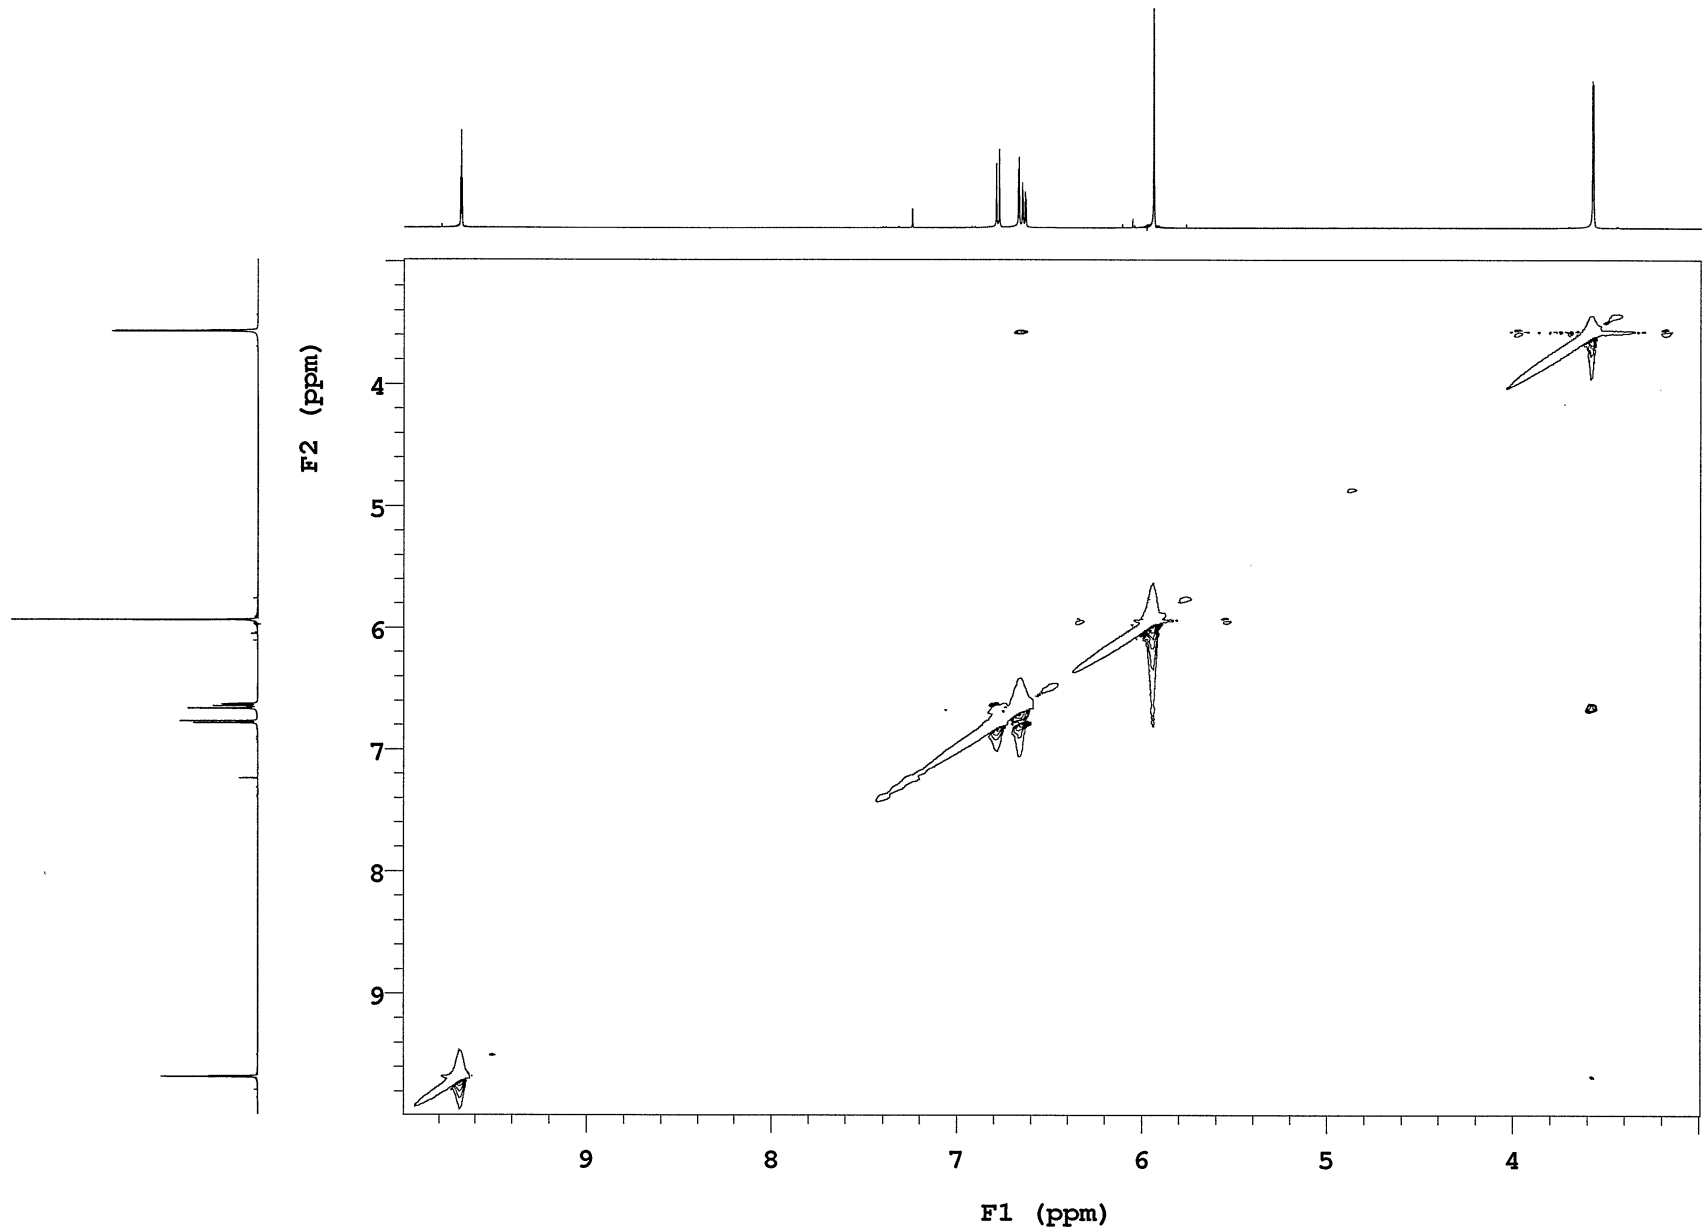NOESY of compound **4q**

Sample Name YYH-116  
Date collected 2021-09-09

Pulse sequence PROTON  
Solvent cdcl3

Temperature 25  
Spectrometer Agilent-NMR-inova500

Study owner vnmr2  
Operator vnmr2

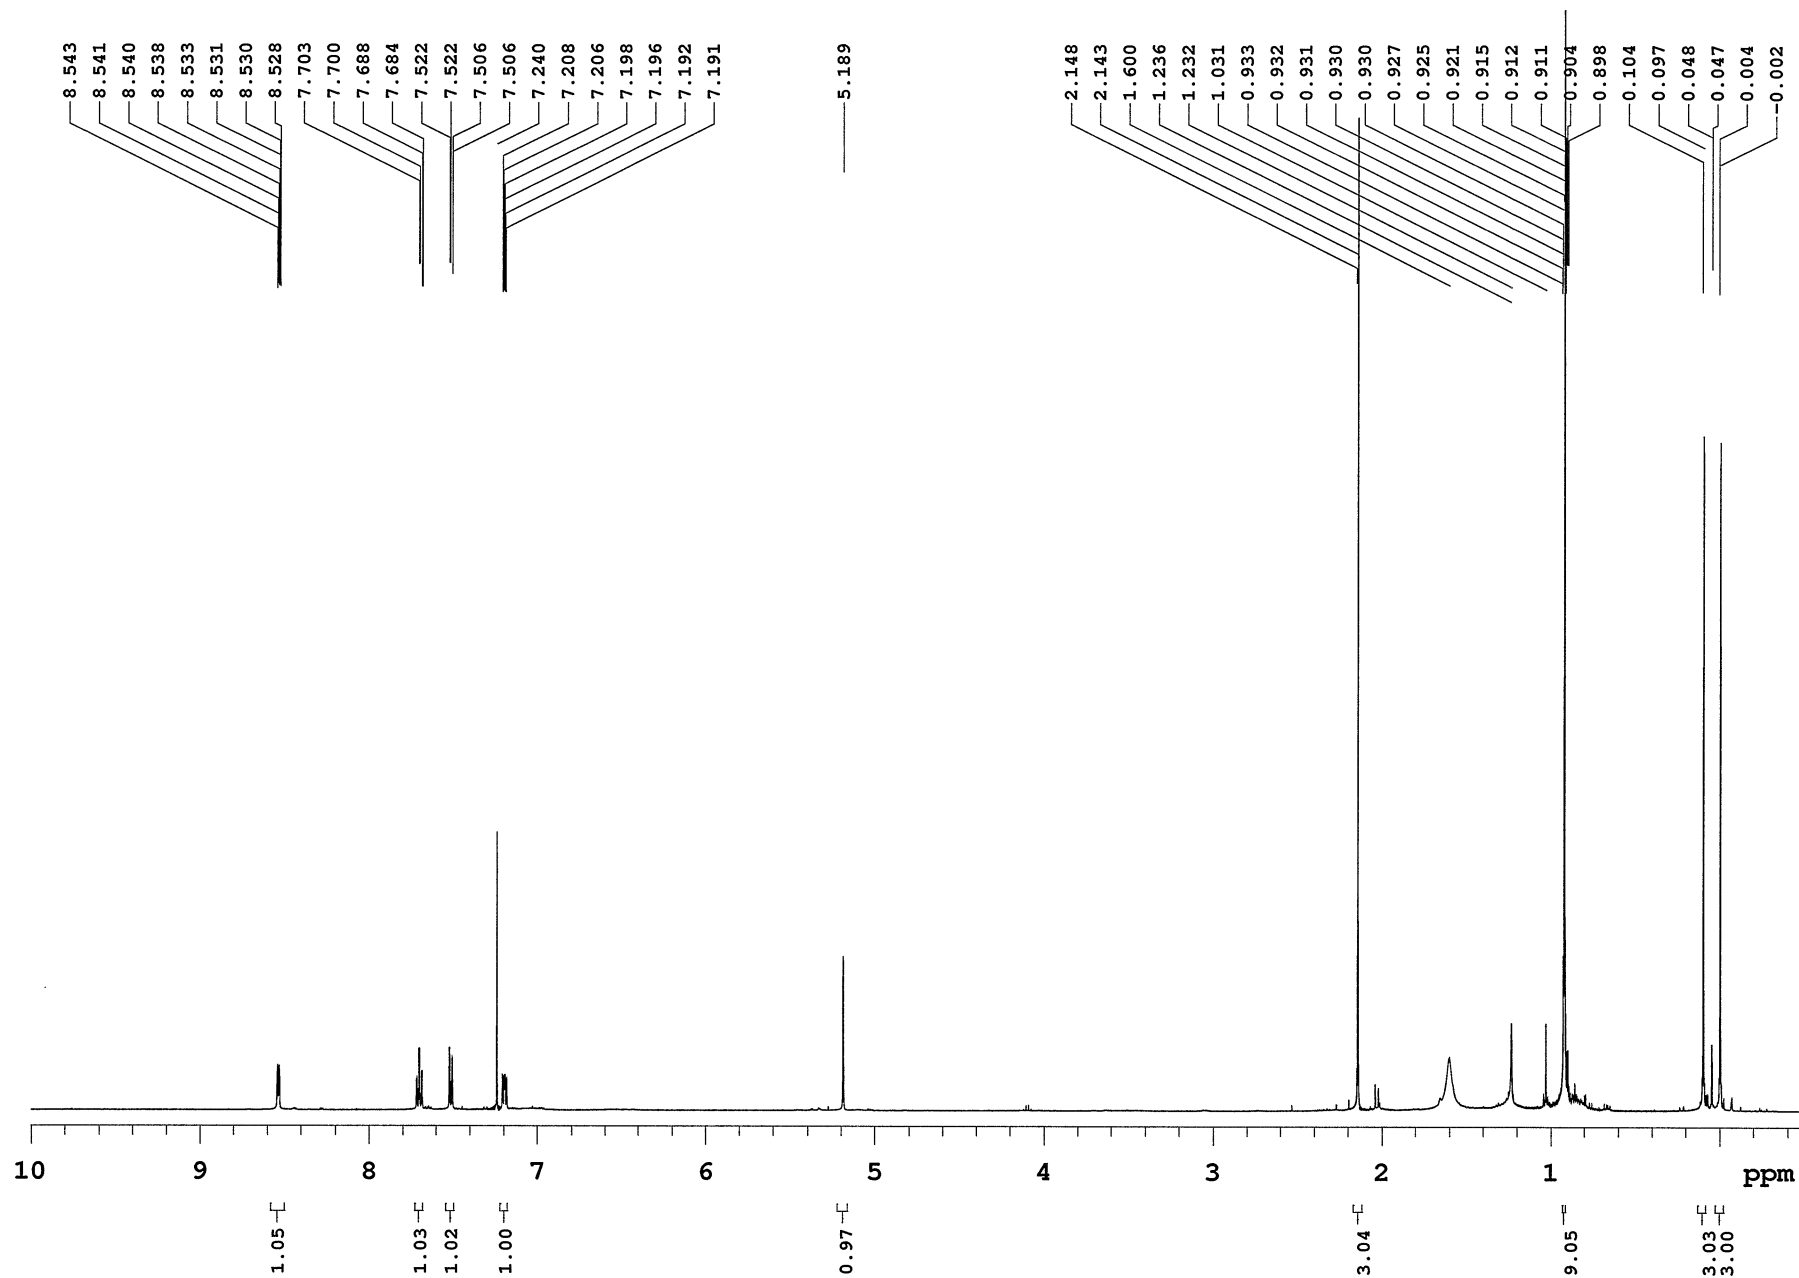



Sample Name YYH-116  
Date collected 2021-09-09

Pulse sequence CARBON  
Solvent cdcl3

Temperature 25  
Spectrometer Agilent-NMR-inova500

Study owner vnmr2  
Operator vnmr2

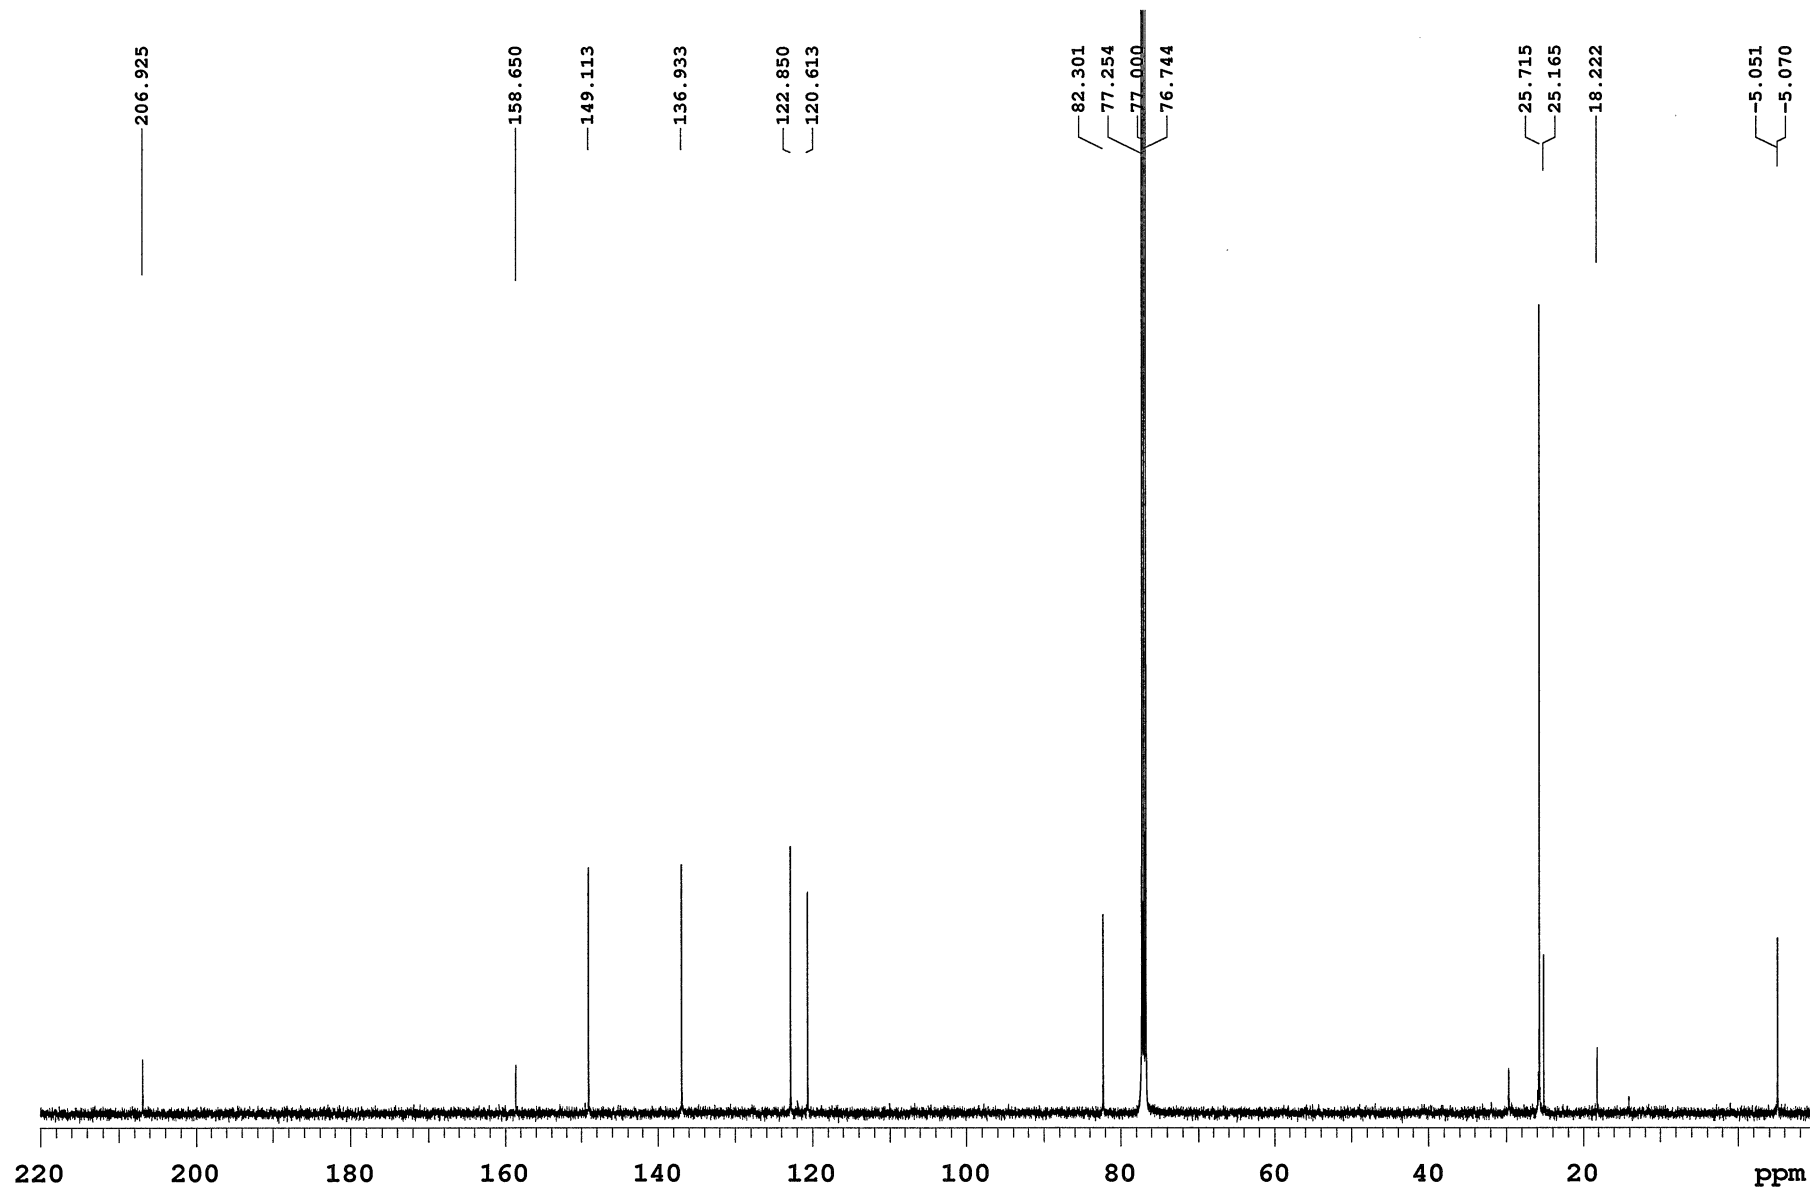

13C NMR (CDCl<sub>3</sub>, 125 MHz) of compound 4r

Sample Name YYH-116  
Date collected 2021-09-09

Pulse sequence DEPT  
Solvent cdcl3

Temperature 25  
Spectrometer Agilent-NMR-inova500

Study owner vnmr2  
Operator vnmr2

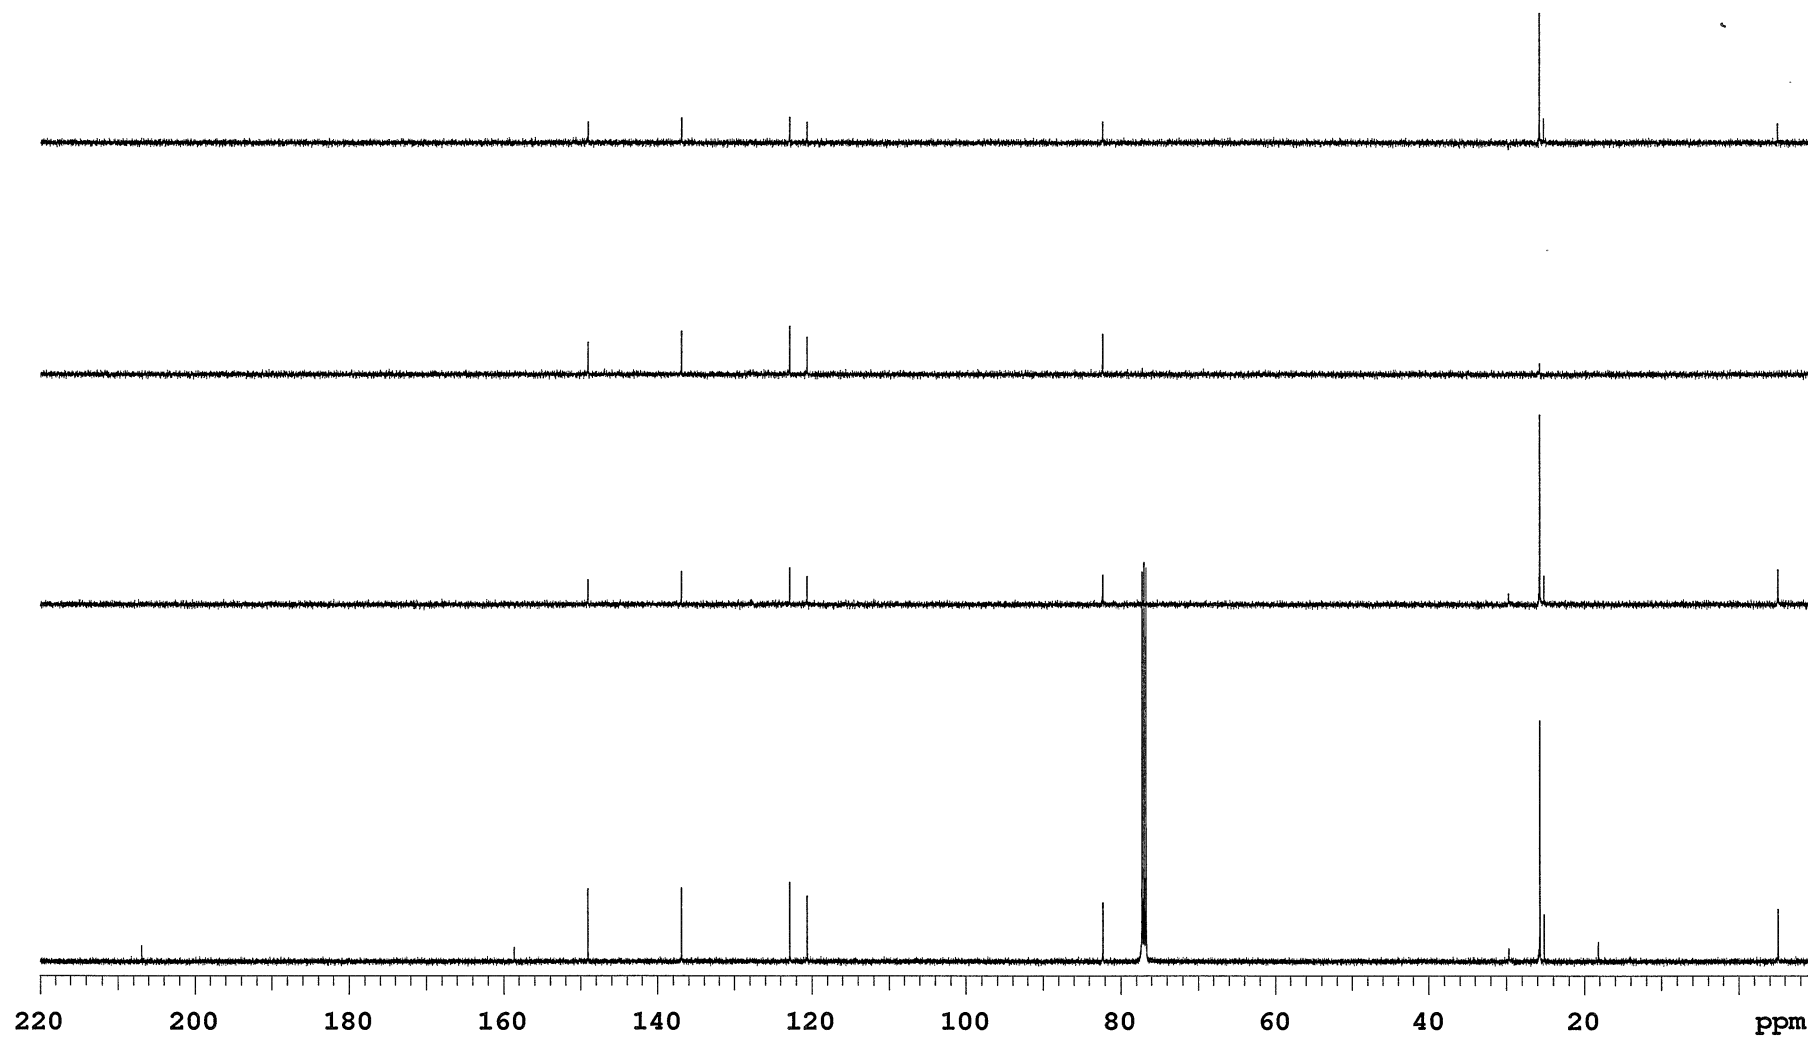

DEPT of compound 4r

Sample Name YYH-116  
Date collected 2021-09-10

Pulse sequence gHSQC  
Solvent cdcl3

Temperature 25  
Spectrometer Agilent-NMR-inova500

Study owner vnmr2  
Operator vnmr2

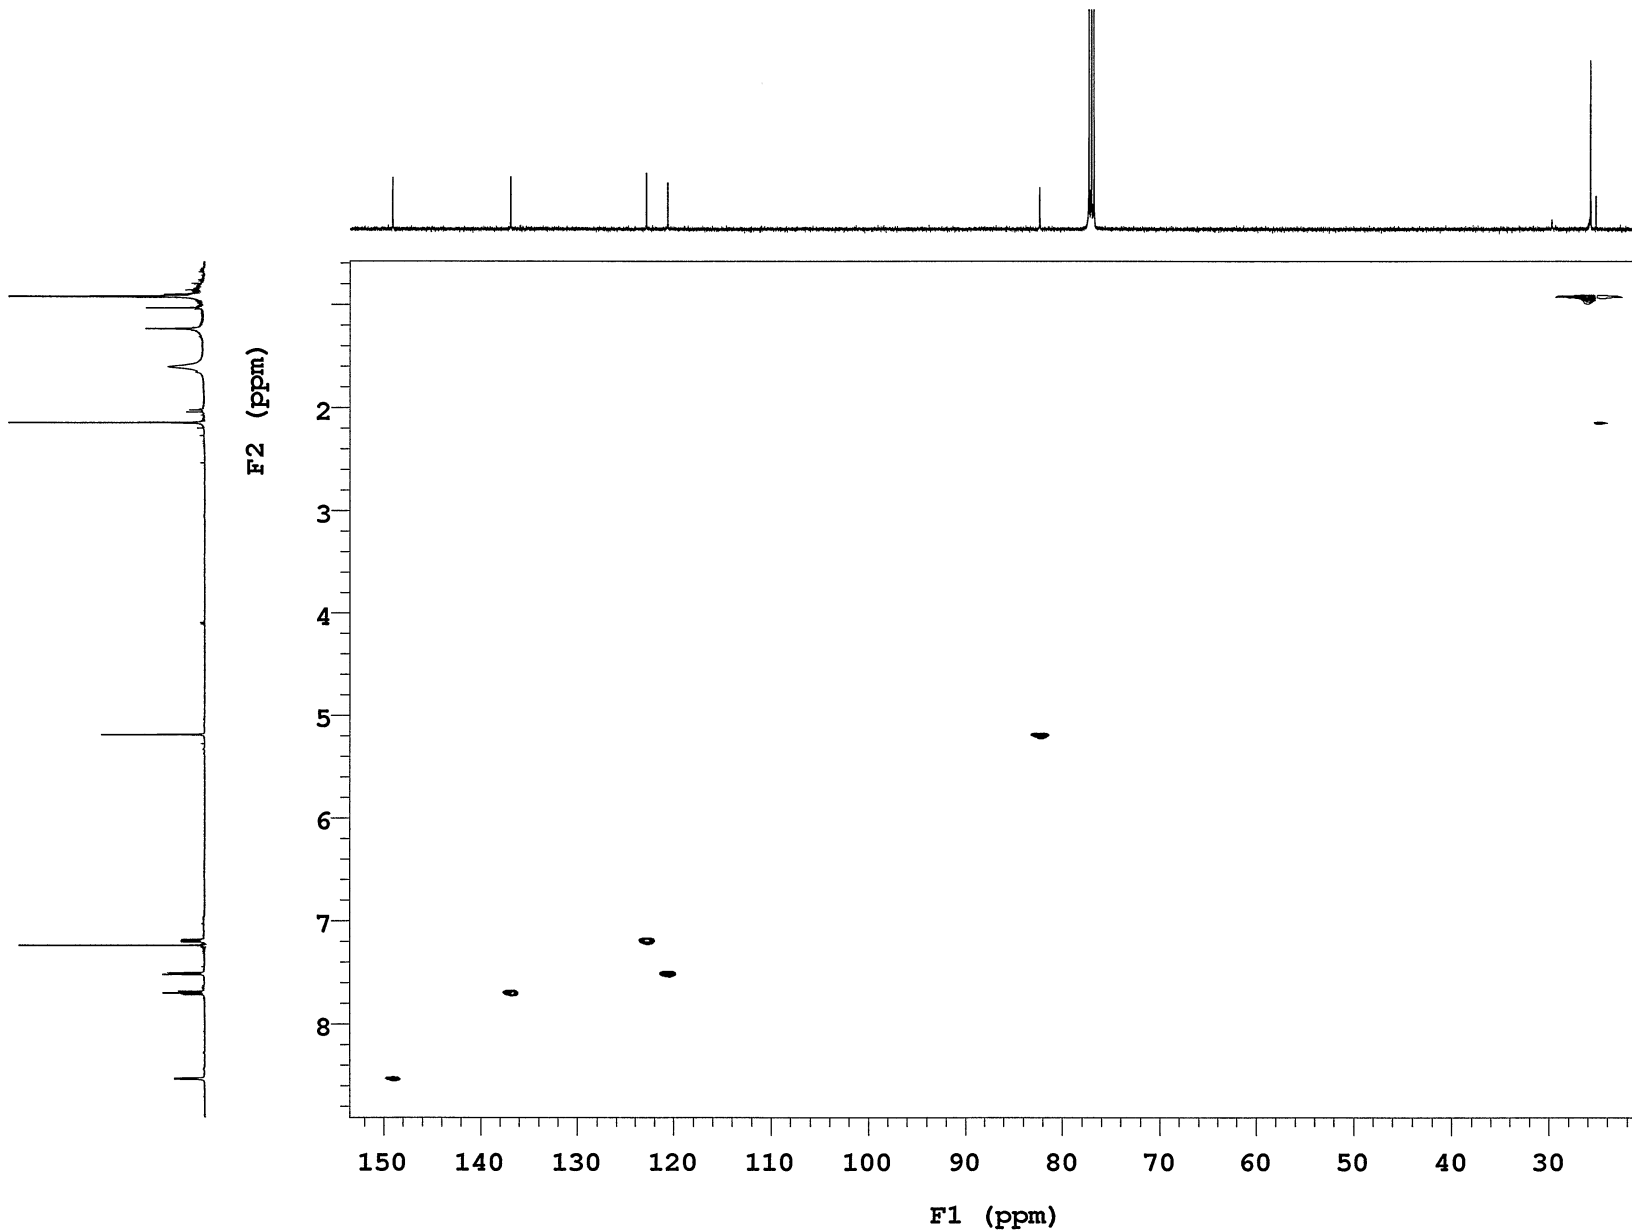

HSQC of compound 4r

Sample Name YYH-116  
Date collected 2021-09-10

Pulse sequence gCOSY  
Solvent cdcl3

Temperature 25  
Spectrometer Agilent-NMR-inova500

Study owner vnmr2  
Operator vnmr2

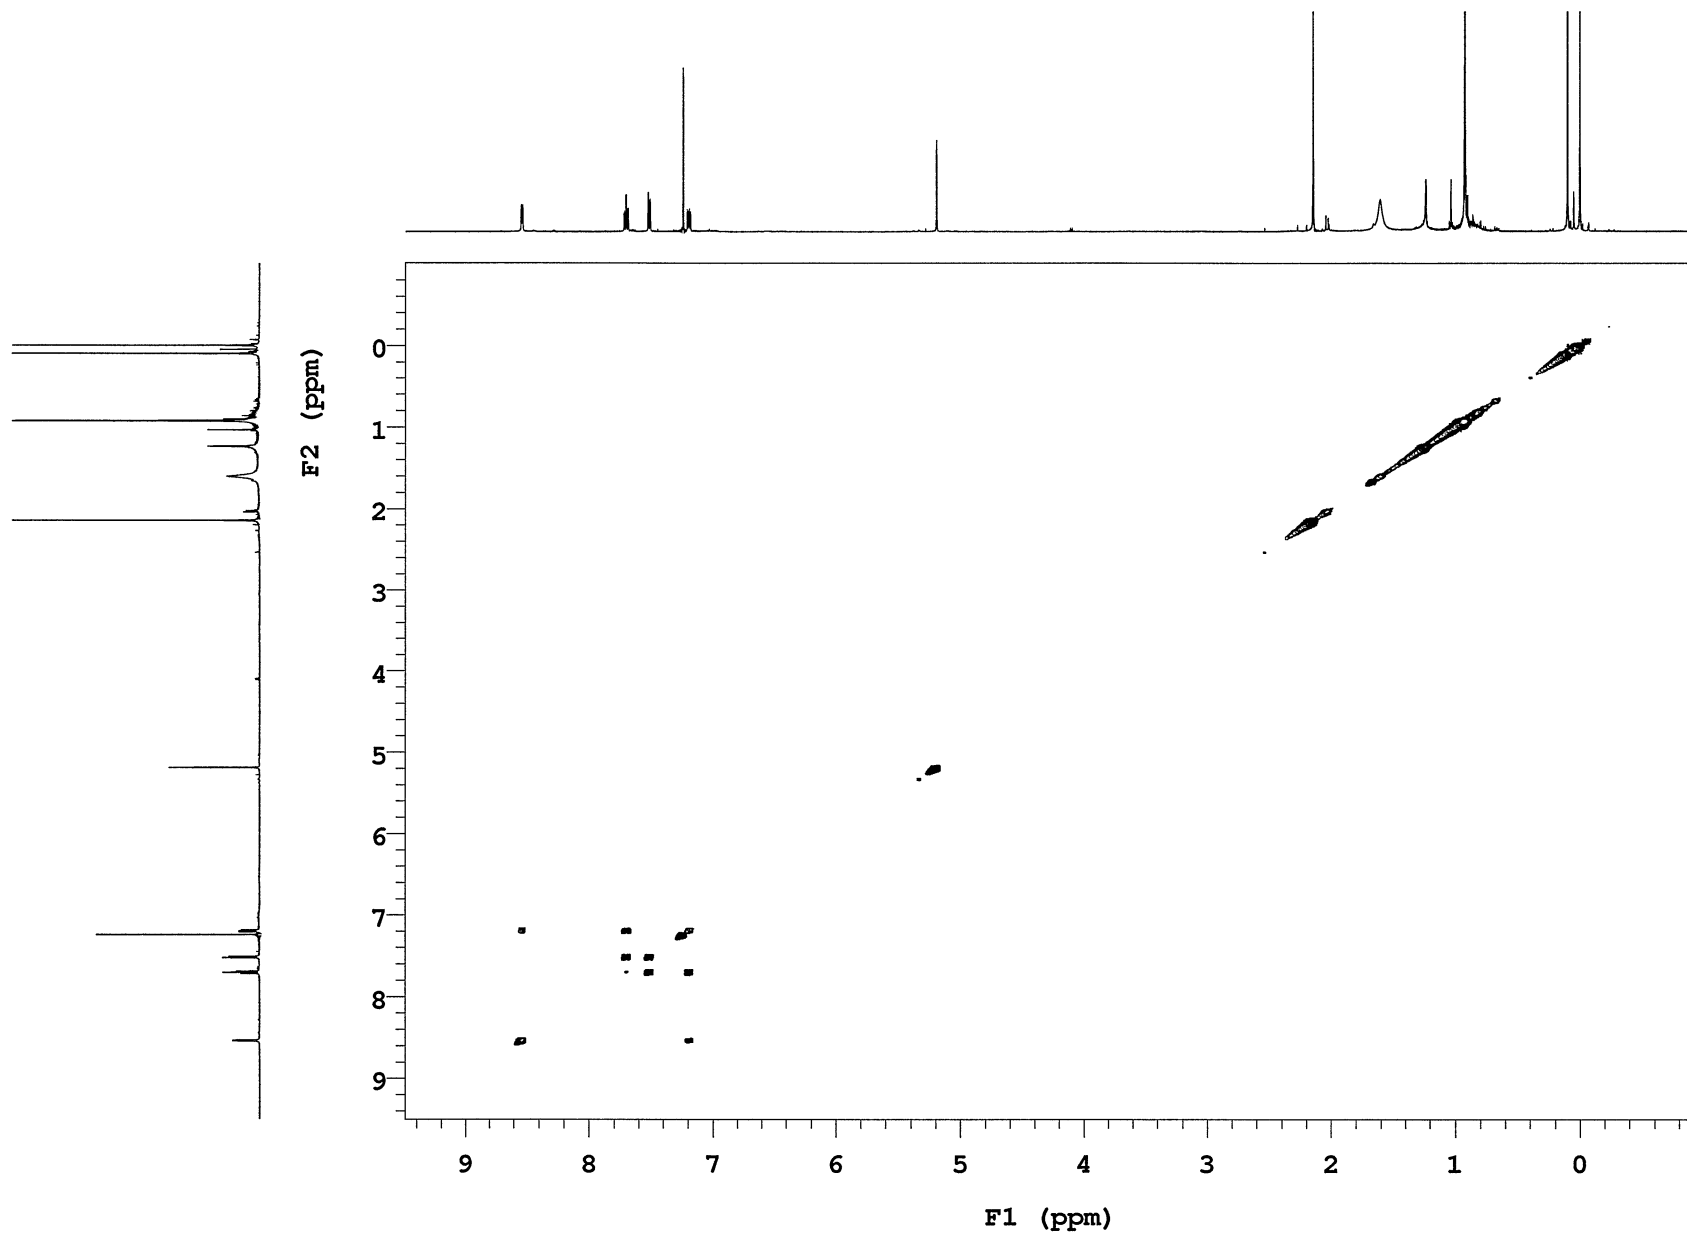

COSY of compound 4r

Sample Name **YYH-116**  
Date collected **2021-09-10**

Pulse sequence **NOESY**  
Solvent **cdcl3**

Temperature **25**  
Spectrometer **Agilent-NMR-inova500**

Study owner **vnmr2**  
Operator **vnmr2**

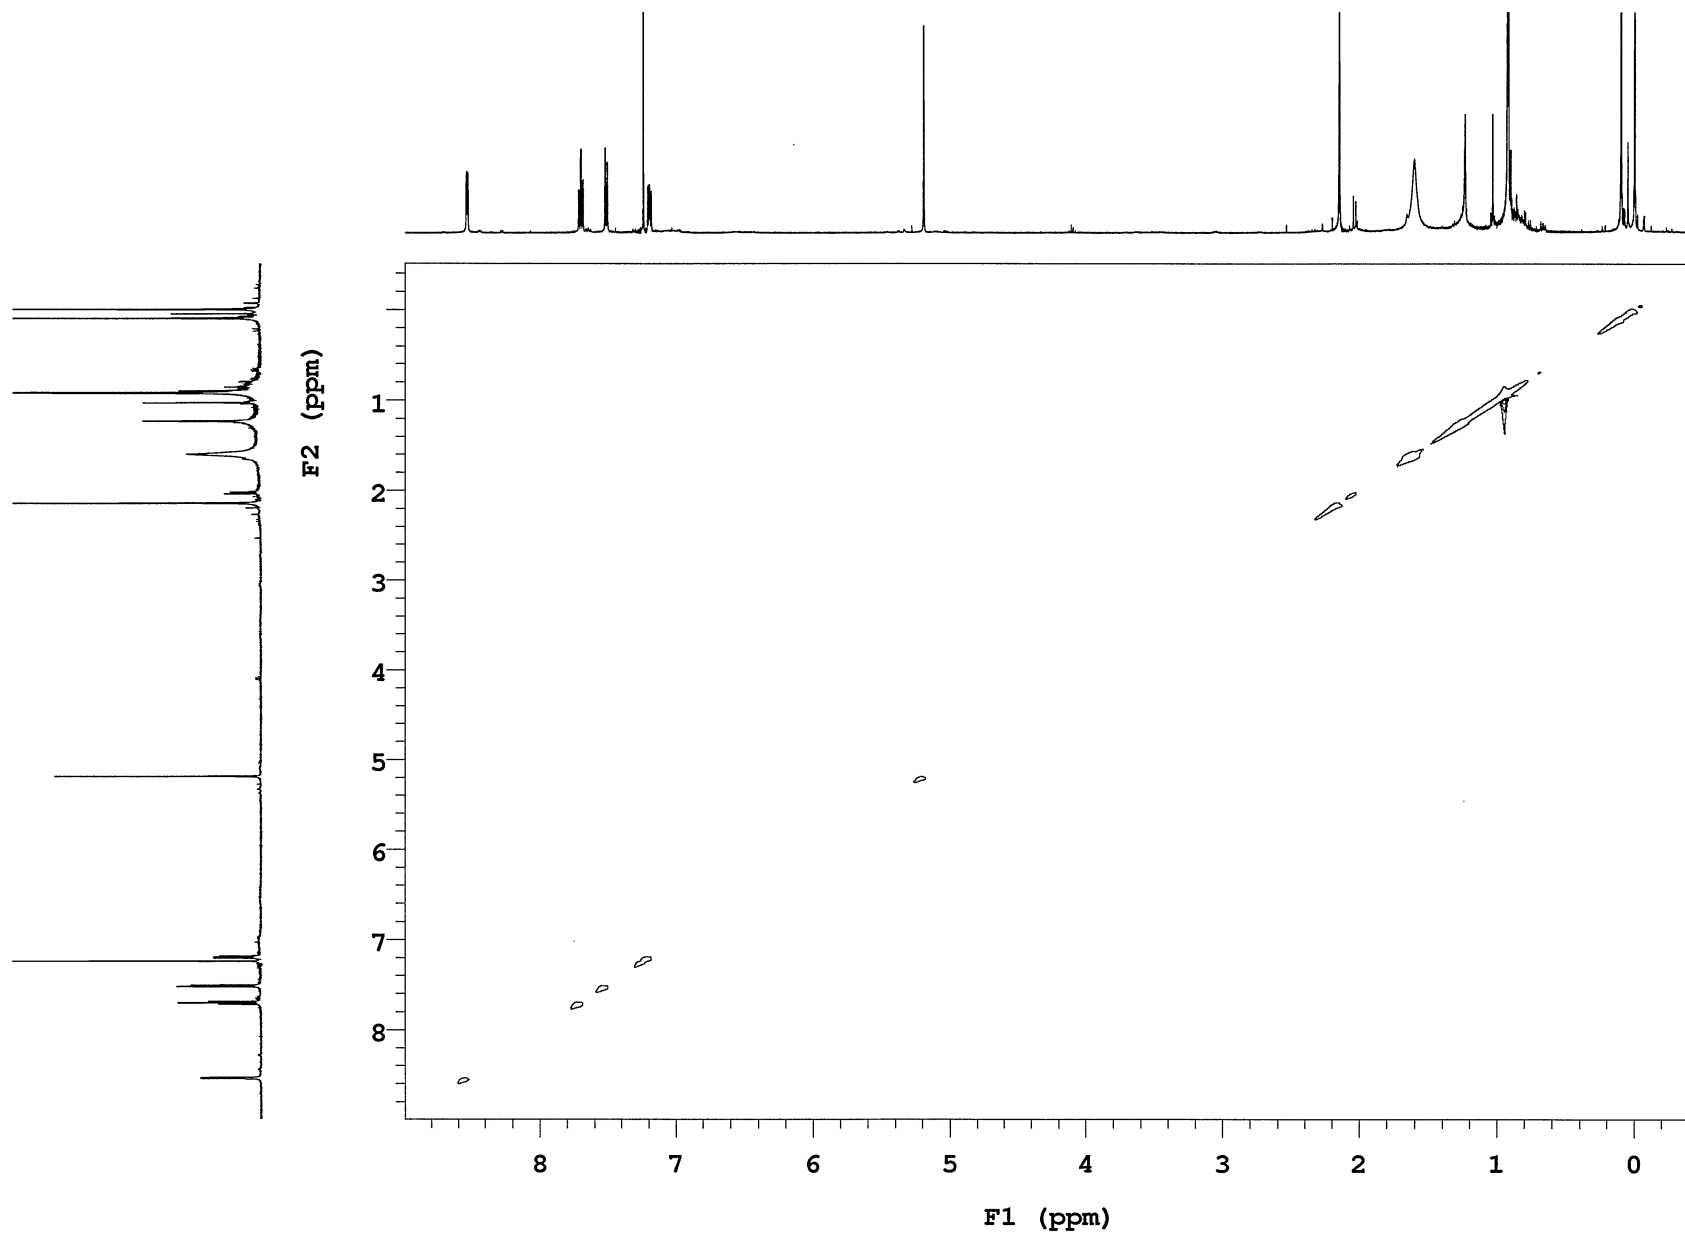

NOESY of compound 4r

1H NMR (CD3CN, 400 MHz) of compound 4s

S162

7.329  
7.311  
7.292  
7.281  
7.258  
7.246  
7.239  
7.221  
7.186  
7.169

3.725  
3.436  
3.427  
2.548  
2.530  
2.511  
2.142  
1.941  
1.935  
1.929  
1.923  
1.916  
1.705  
1.687  
1.671  
1.653  
1.637

Current Data Parameters  
NAME YYH-122  
EXPNO 4  
PROCNO 1

F2 - Acquisition Parameters  
Date\_ 20211117  
Time\_ 13.51 h  
INSTRUM spect  
PROBHD z108618\_0922 (  
PULPROG zg30  
TD 32768  
SOLVENT CD3CN  
NS 16  
DS 0  
SWH 8012.820 Hz  
FIDRES 0.489064 Hz  
AQ 2.0447233 sec  
RG 210.28  
DW 62.400 usec  
DE 16.43 usec  
TE 296.2 K  
D1 2.00000000 sec  
TD0 1  
SFO1 400.1324008 MHz  
NUC1 1H  
P1 14.50 usec  
PLW1 12.80000019 W

F2 - Processing parameters  
SI 16384  
SF 400.1300158 MHz  
WDW EM  
SSB 0  
LB 0 Hz  
GB 0  
PC 1.00

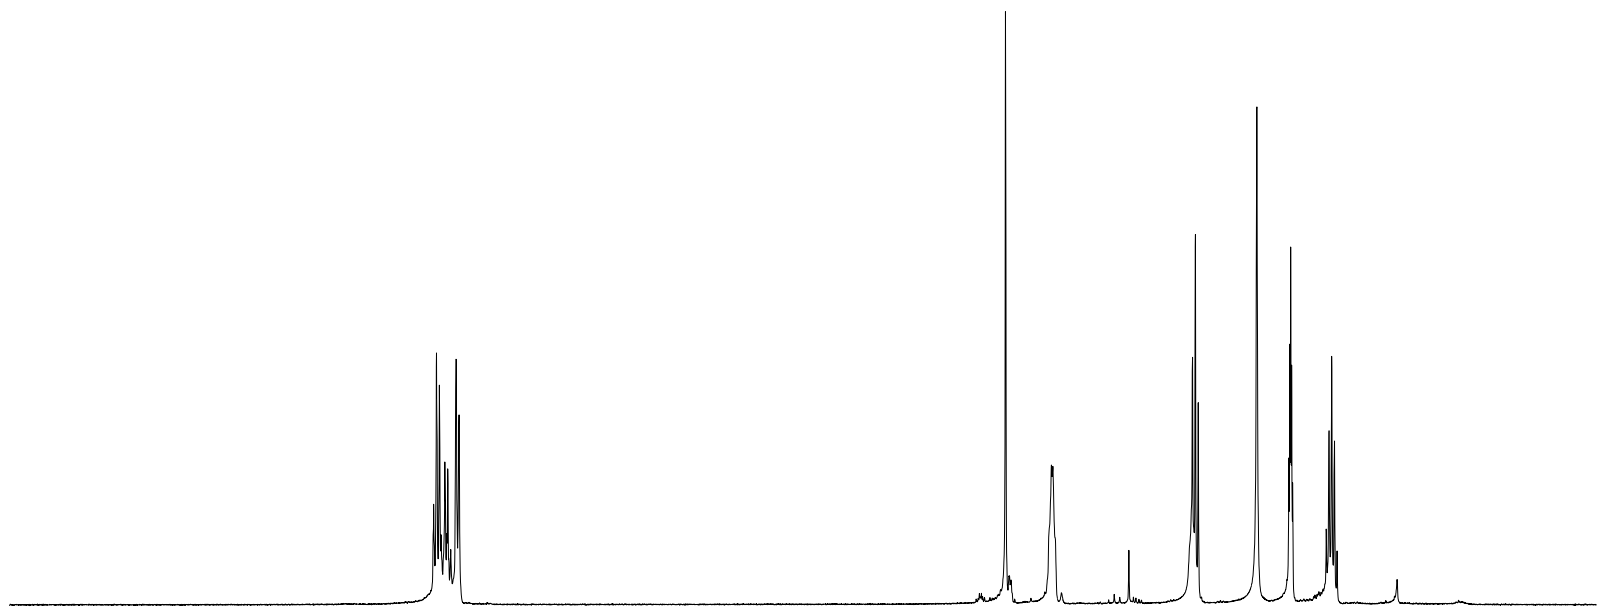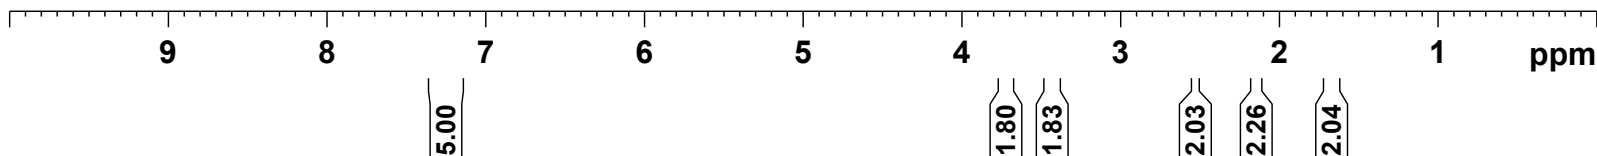

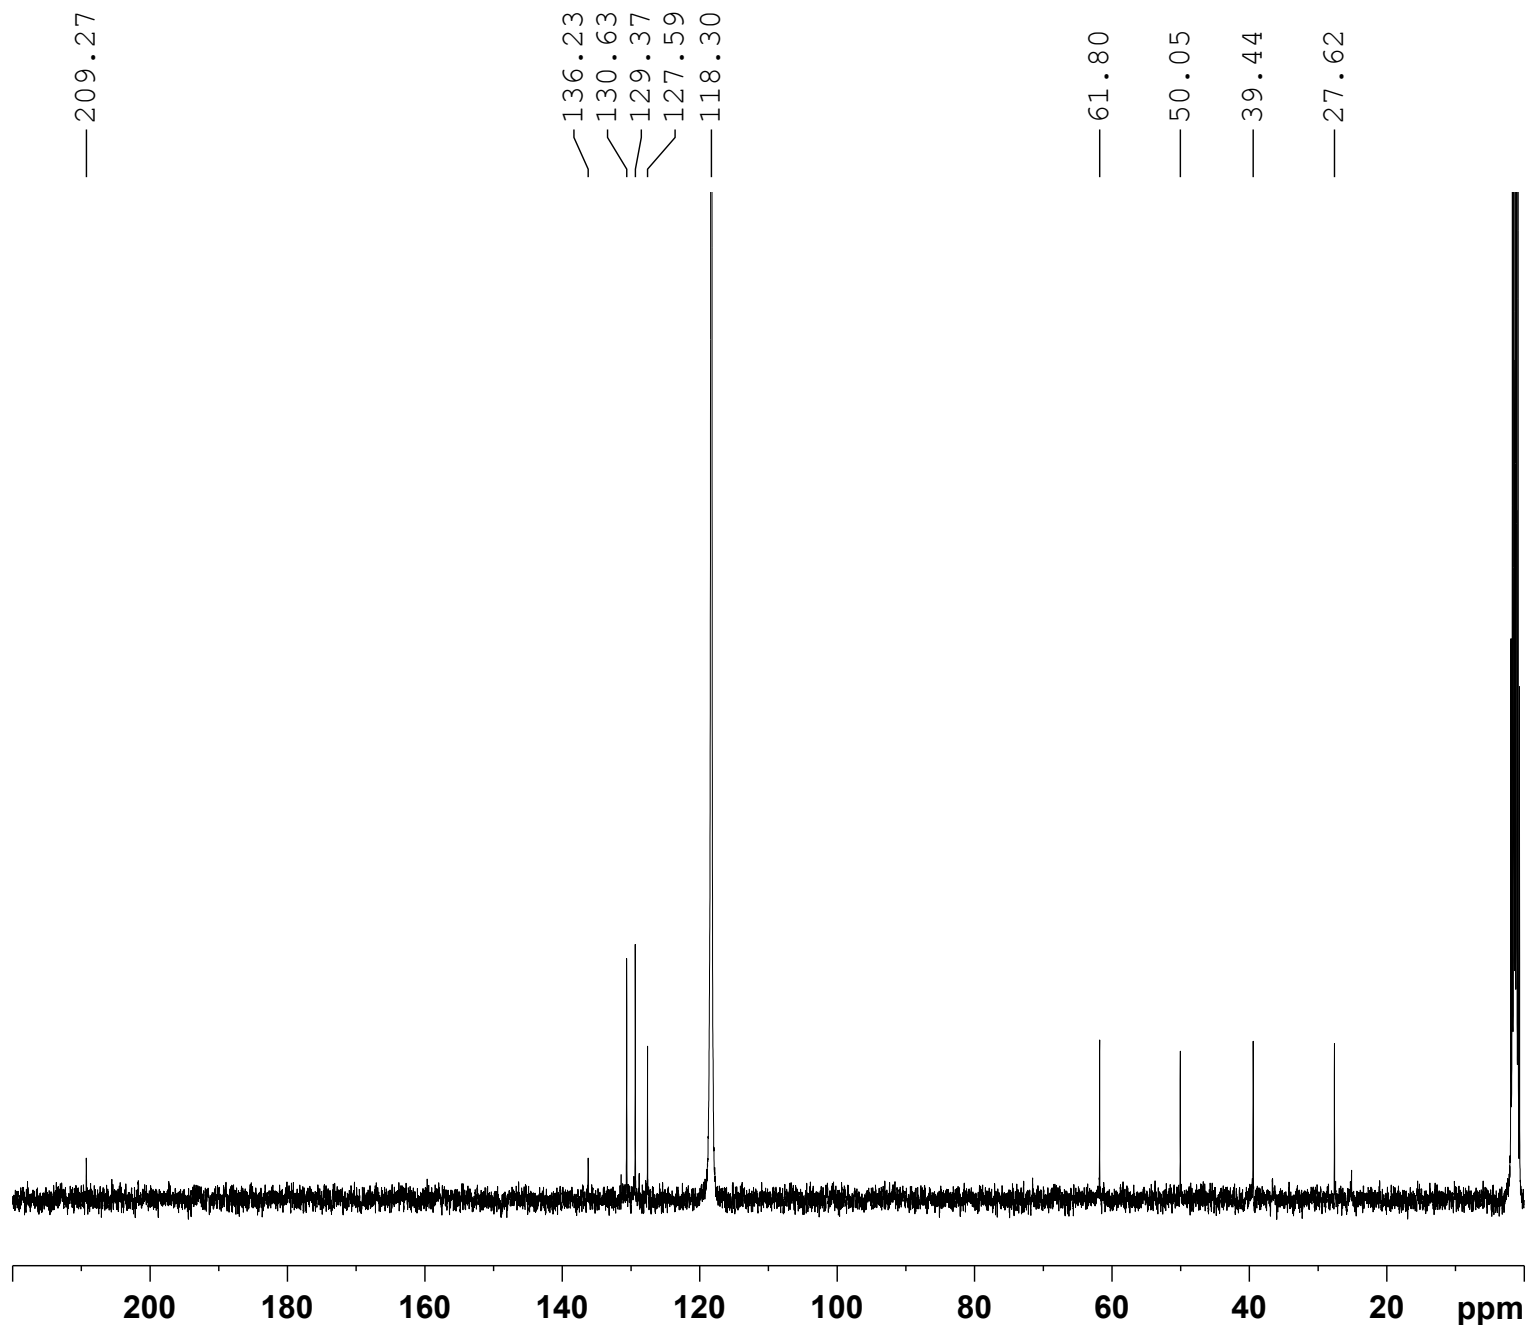

$^{13}\text{C}$  NMR ( $\text{CD}_3\text{CN}$ , 100 MHz) of compound **4s**

Current Data Parameters  
 NAME YYH-122  
 EXPNO 5  
 PROCNO 1

F2 - Acquisition Parameters  
 Date\_ 20211117  
 Time\_ 14.11 h  
 INSTRUM spect  
 PROBHD z108618\_0922 (  
 PULPROG zgpg30  
 TD 32768  
 SOLVENT  $\text{CD}_3\text{CN}$   
 NS 400  
 DS 0  
 SWH 24038.461 Hz  
 FIDRES 1.467191 Hz  
 AQ 0.6815744 sec  
 RG 210.28  
 DW 20.800 usec  
 DE 6.50 usec  
 TE 296.8 K  
 D1 2.00000000 sec  
 D11 0.03000000 sec  
 TD0 1  
 SFO1 100.6233329 MHz  
 NUC1  $^{13}\text{C}$   
 P1 10.50 usec  
 PLW1 44.50000000 W  
 SFO2 400.1316005 MHz  
 NUC2  $^1\text{H}$   
 CPDPRG[2] bi\_waltz65\_256  
 PCPD2 90.00 usec  
 PLW2 14.00000000 W  
 PLW12 0.36340001 W  
 PLW13 0.18250000 W

F2 - Processing parameters  
 SI 32768  
 SF 100.6126697 MHz  
 WDW EM  
 SSB 0  
 LB 2.00 Hz  
 GB 0  
 PC 1.00

## DEPT of compound 4s

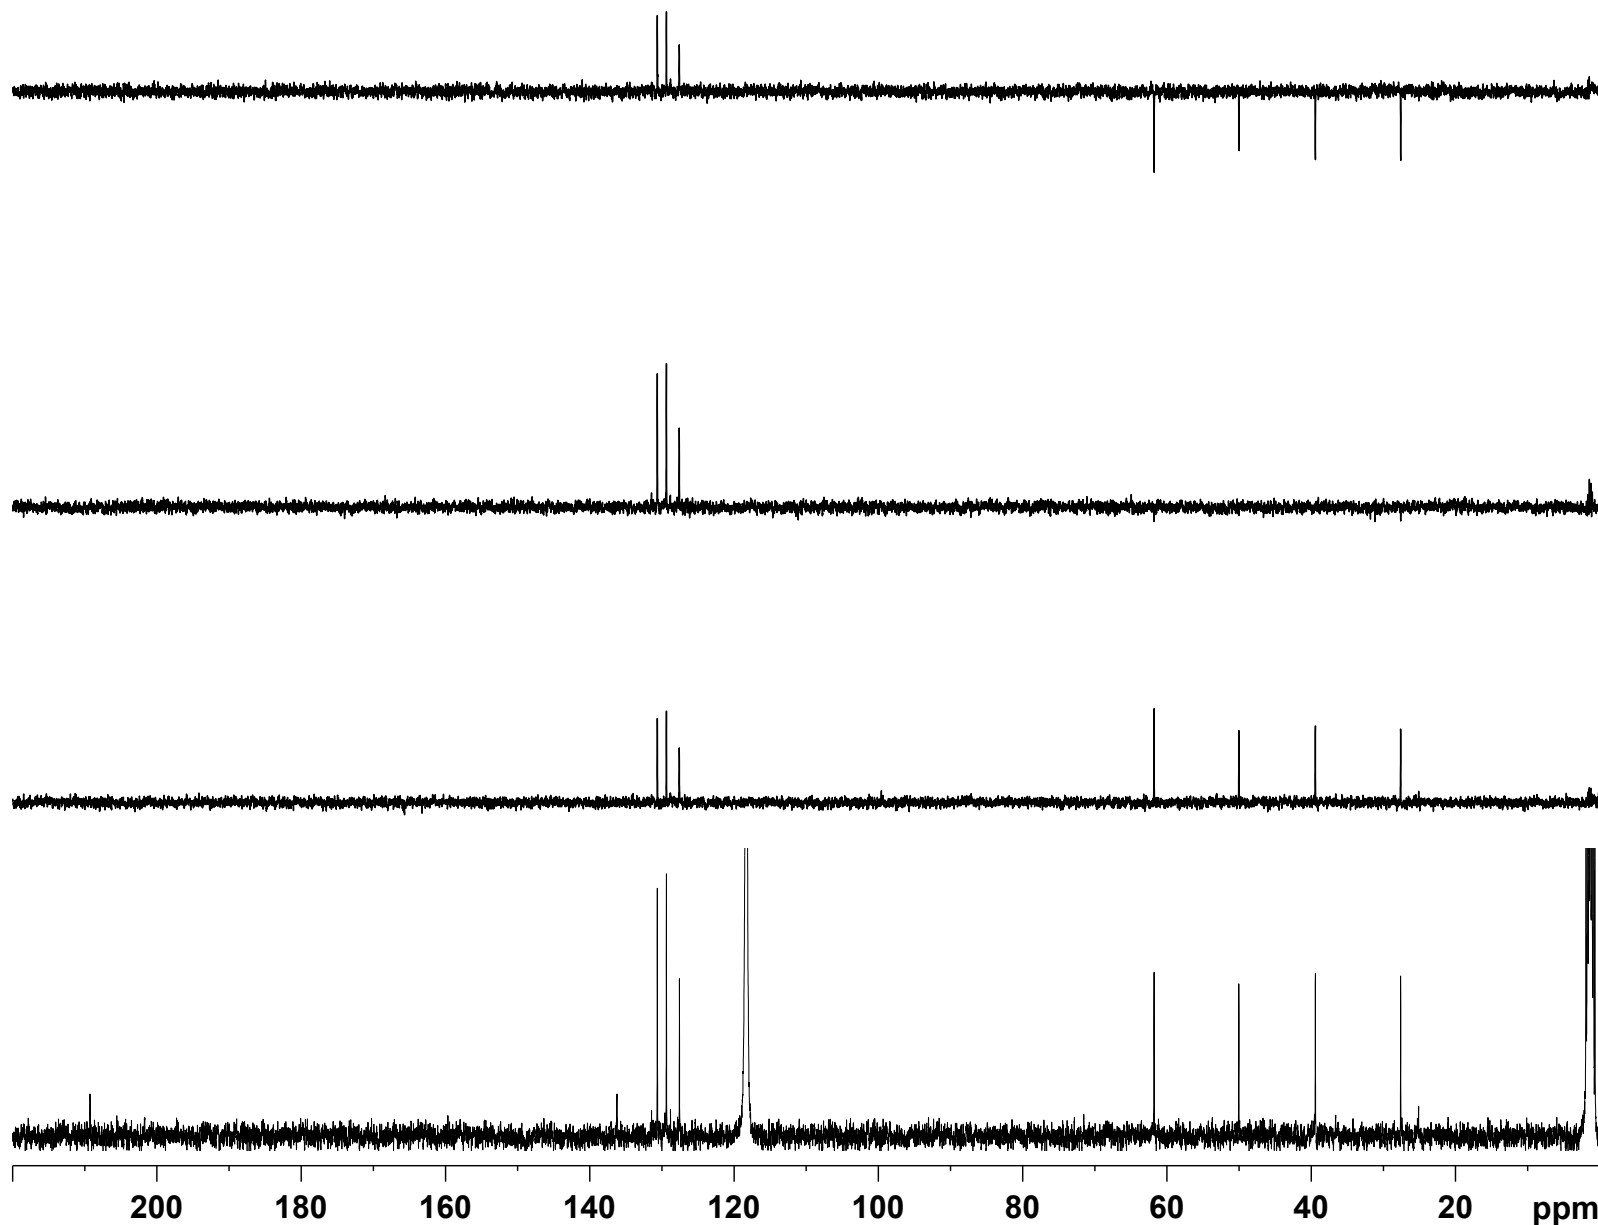

## Current Data Parameters

NAME YYH-122  
 EXPNO 5  
 PROCNO 1

## F2 - Acquisition Parameters

Date\_ 20211117  
 Time 14.11 h  
 INSTRUM spect  
 PROBHD Z108618\_0922 (  
 PULPROG zgpg30  
 TD 32768  
 SOLVENT CD3CN  
 NS 400  
 DS 0  
 SWH 24038.461 Hz  
 FIDRES 1.467191 Hz  
 AQ 0.6815744 sec  
 RG 210.28  
 DW 20.800 usec  
 DE 6.50 usec  
 TE 296.8 K  
 D1 2.00000000 sec  
 D11 0.03000000 sec  
 TD0 1  
 SFO1 100.6233329 MHz  
 NUC1 13C  
 P1 10.50 usec  
 PLW1 44.50000000 W  
 SFO2 400.1316005 MHz  
 NUC2 1H  
 CPDPRG[2 bi\_waltz65\_256  
 PCPD2 90.00 usec  
 PLW2 14.00000000 W  
 PLW12 0.36340001 W  
 PLW13 0.18250000 W

## F2 - Processing parameters

SI 32768  
 SF 100.6126697 MHz  
 WDW EM  
 SSB 0  
 LB 2.00 Hz  
 GB 0  
 PC 1.00



# HSQC of compound 4s

S165

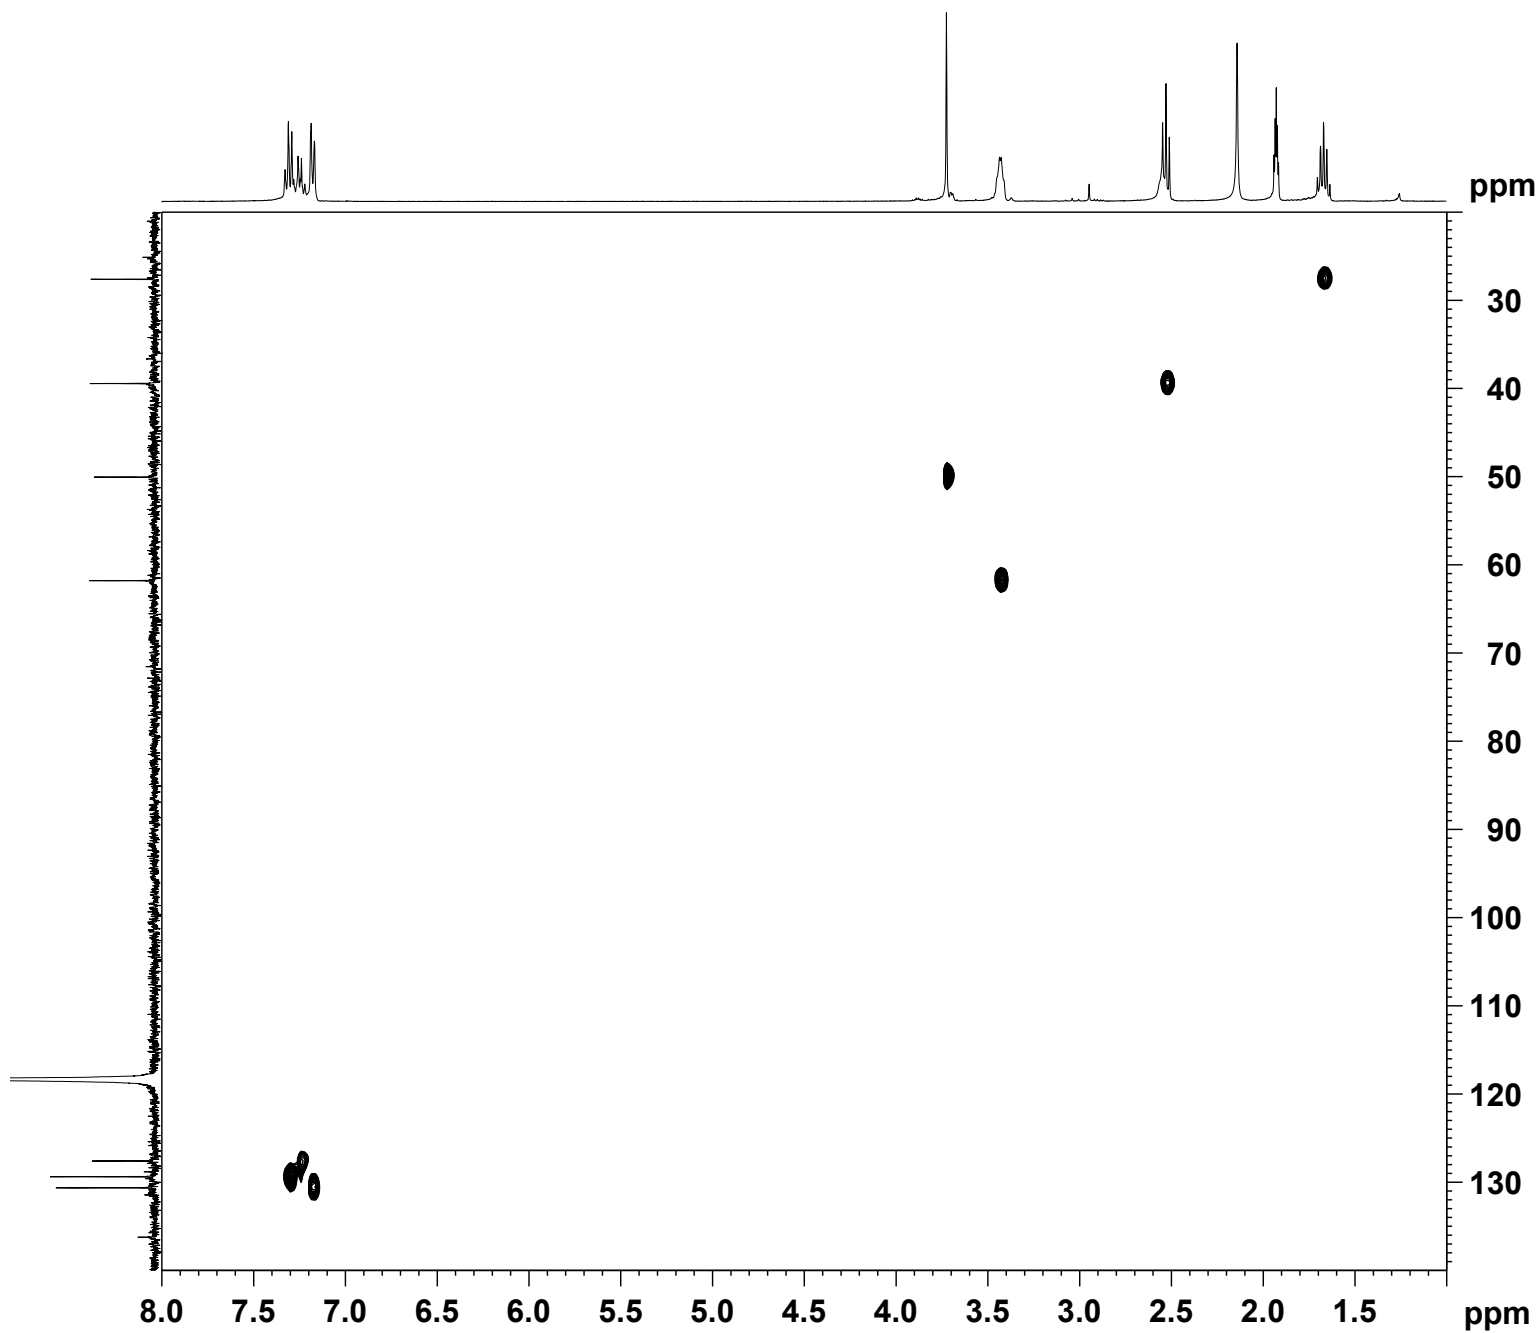

```

Current Data Parameters
NAME      YYH-122
EXPNO    9
PROCNO   1

F2 - Acquisition Parameters
Date_    20211118
Time     22.58 h
INSTRUM  spect
PROBHD   Z108618_0922 (
PULPROG  hsqcetgpsisp2.2
TD       2048
SOLVENT  CD3CN
NS       8
DS       16
SWH      8012.820 Hz
FIDRES   7.825020 Hz
AQ       0.1277952 sec
RG       210.28
DW       62.400 usec
DE       6.50 usec
TE       296.5 K
CNST2    145.0000000
CNST17   -0.5000000
D0       0.00000300 sec
D1       1.50000000 sec
D4       0.00172414 sec
D11      0.03000000 sec
D16      0.00020000 sec
D24      0.00086207 sec
IN0      0.00002080 sec
TDav     1
SFO1     400.1324008 MHz
NUC1     1H
P1       14.50 usec
P2       29.00 usec
P28      1000.00 usec
PLW1     12.80000019 W
SFO2     100.6233329 MHz
NUC2     13C
CPDPRG[2]  garp
P3       10.50 usec
P14      500.00 usec
P24      2000.00 usec
PCPD2    80.00 usec
PLW0     0 W
PLW2     44.00000000 W
PLW12    0.75796998 W
SPNAM[3] Crp60,0.5,20.1
SFOAL3   0.500
SPOFFS3  0 Hz
SPW3     7.41179991 W
SPNAM[7] Crp60comp.4
SFOAL7   0.500
SPOFFS7  0 Hz
SPW7     7.41179991 W
GPNAM[1] SMSQ10.100
GPZ1     80.00 %
GPNAM[2] SMSQ10.100
GPZ2     20.10 %
GPNAM[3] SMSQ10.100
GPZ3     11.00 %
GPNAM[4] SMSQ10.100
GPZ4     -5.00 %
P16      1000.00 usec
P19      600.00 usec

F1 - Acquisition parameters
TD       256
SFO1     100.6233 MHz
FIDRES   187.800476 Hz
SW       238.896 ppm
FnMODE   Echo-Antiecho

F2 - Processing parameters
SI       1024
SF       400.1300158 MHz
WDW      QSINE
SSB      2
LB       0 Hz
GB       0
PC       1.40

F1 - Processing parameters
SI       1024
MC2     echo-antiecho
SF       100.6126697 MHz
WDW      QSINE
SSB      2
LB       0 Hz
GB       0
    
```

## COSY of compound 4s

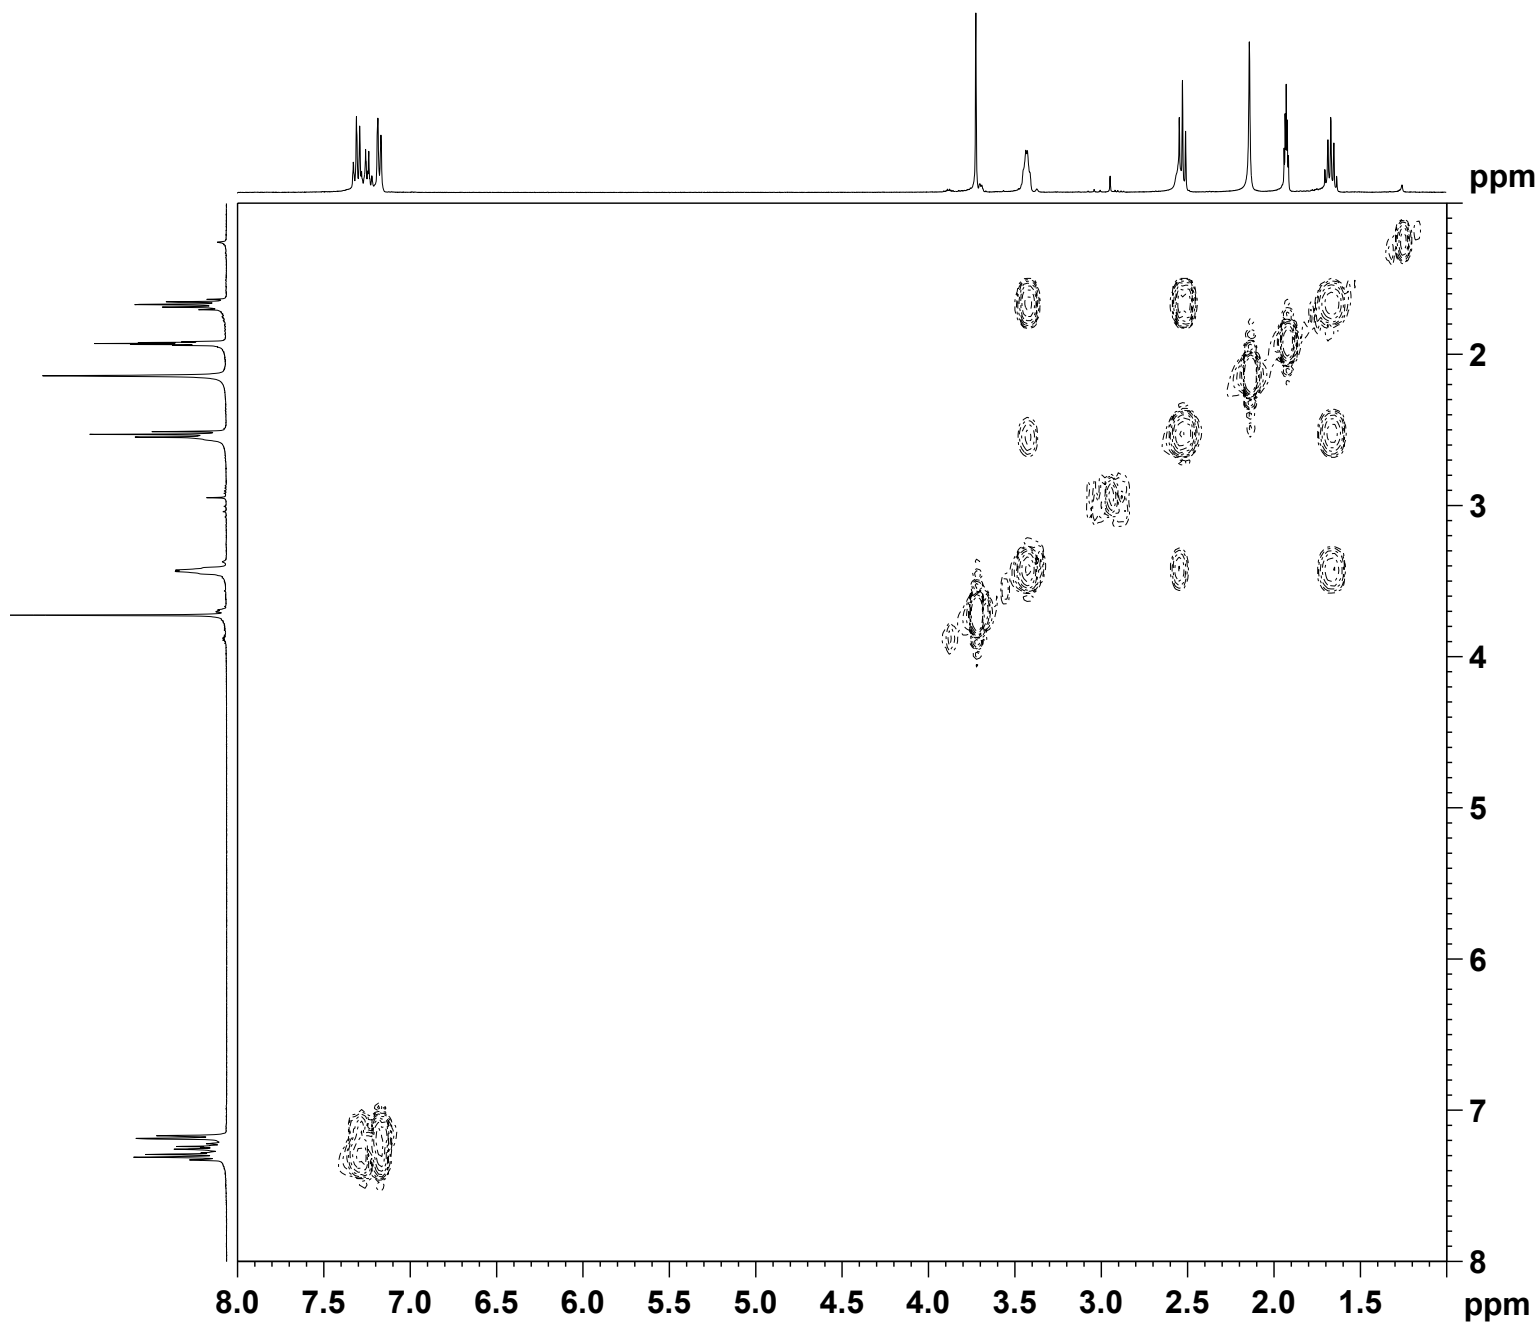

Current Data Parameters  
 NAME YYH-122  
 EXPNO 10  
 PROCNO 1

## F2 - Acquisition Parameters

Date\_ 20211118  
 Time 23.55 h  
 INSTRUM spect  
 PROBHD Z108618 0922 (  
 PULPROG cosygpppqf  
 TD 2048  
 SOLVENT CD3CN  
 NS 8  
 DS 16  
 SWH 8012.820 Hz  
 FIDRES 7.825020 Hz  
 AQ 0.1277952 sec  
 RG 210.28  
 DW 62.400 usec  
 DE 6.50 usec  
 TE 297.0 K  
 D0 0.00000300 sec  
 D1 2.00000000 sec  
 D11 0.03000000 sec  
 D12 0.00002000 sec  
 D13 0.00000400 sec  
 D16 0.00020000 sec  
 IN0 0.00012480 sec  
 T Dav 1  
 SFO1 400.1324008 MHz  
 NUC1 1H  
 P0 14.50 usec  
 P1 14.50 usec  
 P17 2500.00 usec  
 PLW1 12.80000019 W  
 PLW10 2.99020004 W  
 GPNAM[1] SMSQ10.100  
 GPZ1 10.00 %  
 P16 1000.00 usec

## F1 - Acquisition parameters

TD 256  
 SFO1 400.1324 MHz  
 FIDRES 62.600159 Hz  
 SW 20.025 ppm  
 FnmODE QF

## F2 - Processing parameters

SI 1024  
 SF 400.1300158 MHz  
 WDW QSINE  
 SSB 0  
 LB 0 Hz  
 GB 0  
 PC 1.40

## F1 - Processing parameters

SI 1024  
 MC2 QF  
 SF 400.1300158 MHz  
 WDW QSINE  
 SSB 0  
 LB 0 Hz  
 GB 0

## NOESY of compound 4s

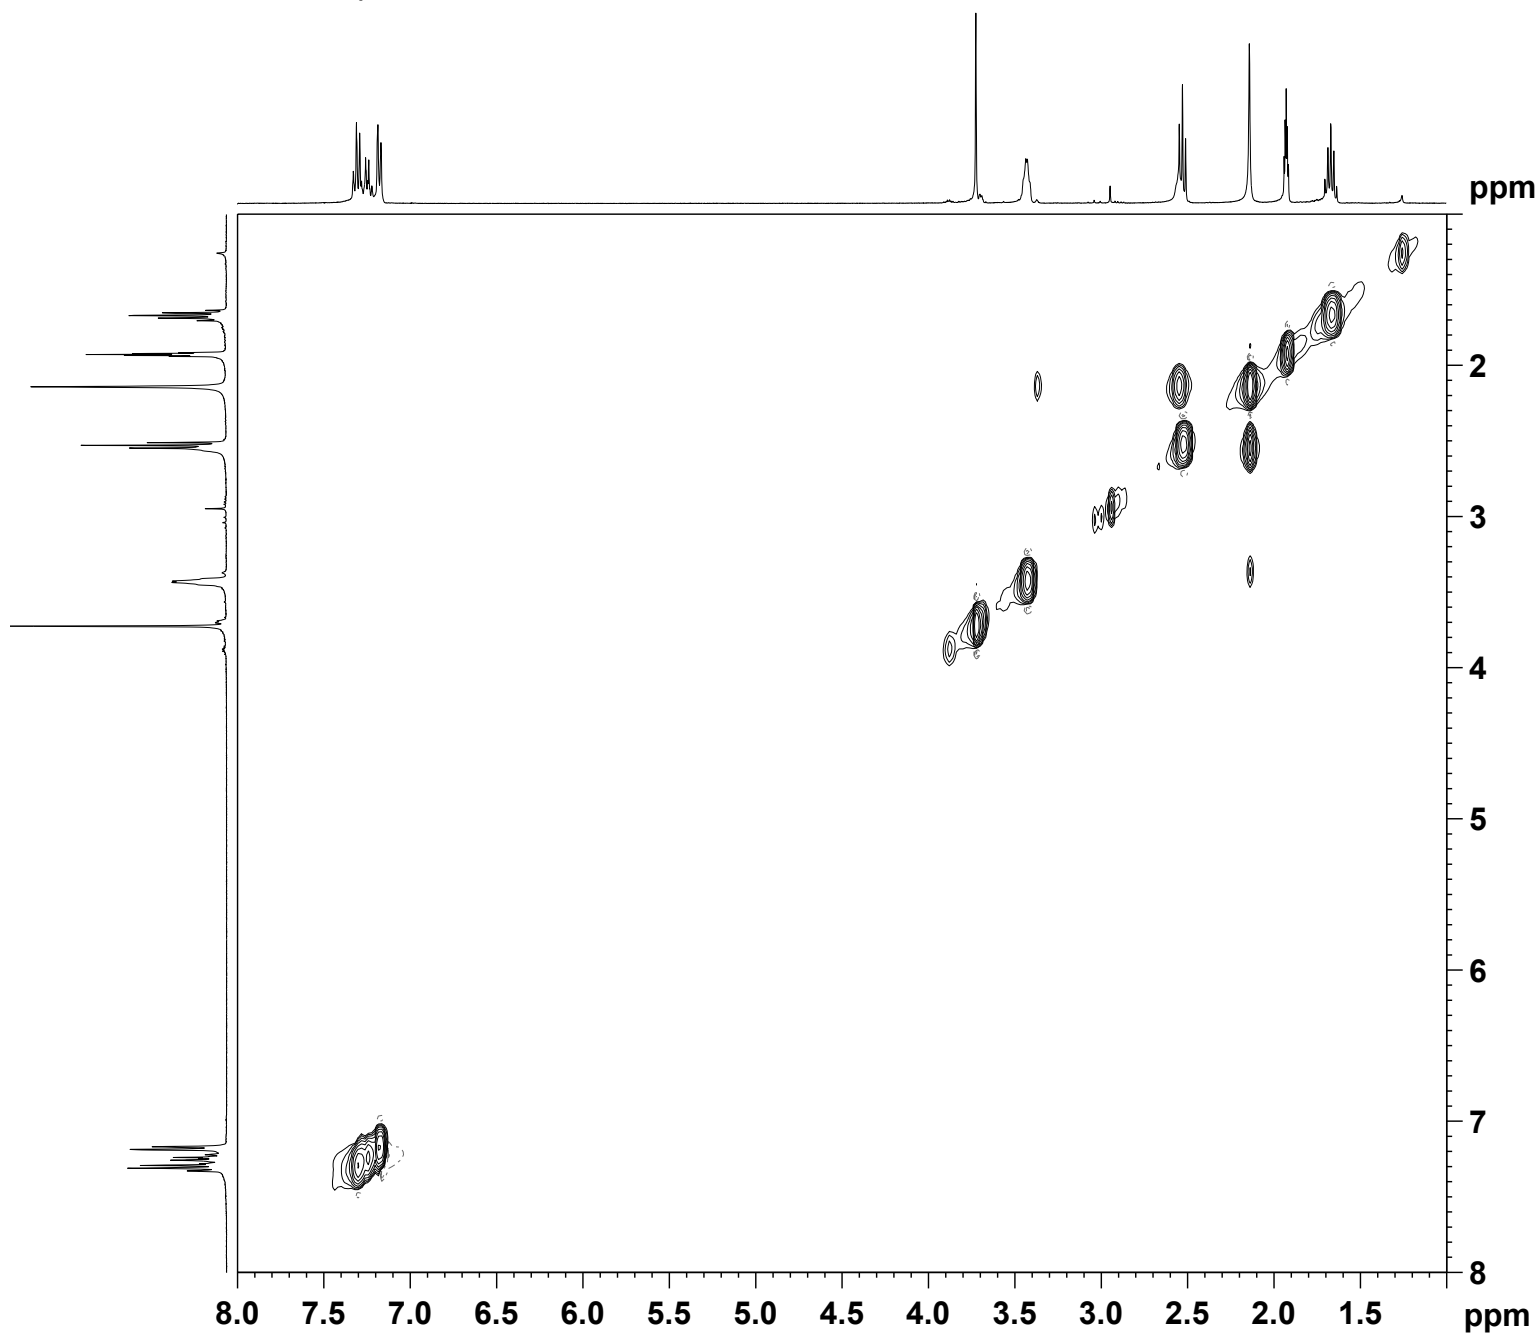

Current Data Parameters  
 NAME YYH-122  
 EXPNO 11  
 PROCNO 1

F2 - Acquisition Parameters  
 Date 20211119  
 Time 1.11 h  
 INSTRUM spect  
 PROBHD Z108618\_0922 (  
 PULPROG noesygpphpp  
 TD 2048  
 SOLVENT CD3CN  
 NS 8  
 DS 16  
 SWH 8012.820 Hz  
 FIDRES 7.825020 Hz  
 AQ 0.1277952 sec  
 RG 210.28  
 DW 62.400 usec  
 DE 6.50 usec  
 TE 296.5 K  
 D0 0.00004394 sec  
 D1 2.00000000 sec  
 D8 0.40000001 sec  
 D11 0.03000000 sec  
 D12 0.00002000 sec  
 D16 0.00020000 sec  
 IN0 0.00012480 sec  
 TDev 1  
 SFO1 400.1324008 MHz  
 NUC1 1H  
 P1 14.50 usec  
 P2 29.00 usec  
 P17 2500.00 usec  
 PLW1 12.80000019 W  
 PLW10 2.99020004 W  
 GPNAM[1] SMSQ10.100  
 GPZ1 40.00 %  
 P16 1000.00 usec

F1 - Acquisition parameters  
 TD 256  
 SFO1 400.1324 MHz  
 FIDRES 62.600159 Hz  
 SW 20.025 ppm  
 FnmODE States-TPPI

F2 - Processing parameters  
 SI 1024  
 SF 400.1300158 MHz  
 WDW QSINE  
 SSB 2  
 LB 0 Hz  
 GB 0  
 PC 1.40

F1 - Processing parameters  
 SI 1024  
 MC2 States-TPPI  
 SF 400.1300158 MHz  
 WDW QSINE  
 SSB 2  
 LB 0 Hz  
 GB 0

Sample Name **YYH-106**  
Date collected **2021-08-03**Pulse sequence **PROTON**  
Solvent **cdcl3**Temperature **25**  
Spectrometer **Agilent-NMR-inova500**Study owner **vnmr2**  
Operator **vnmr2**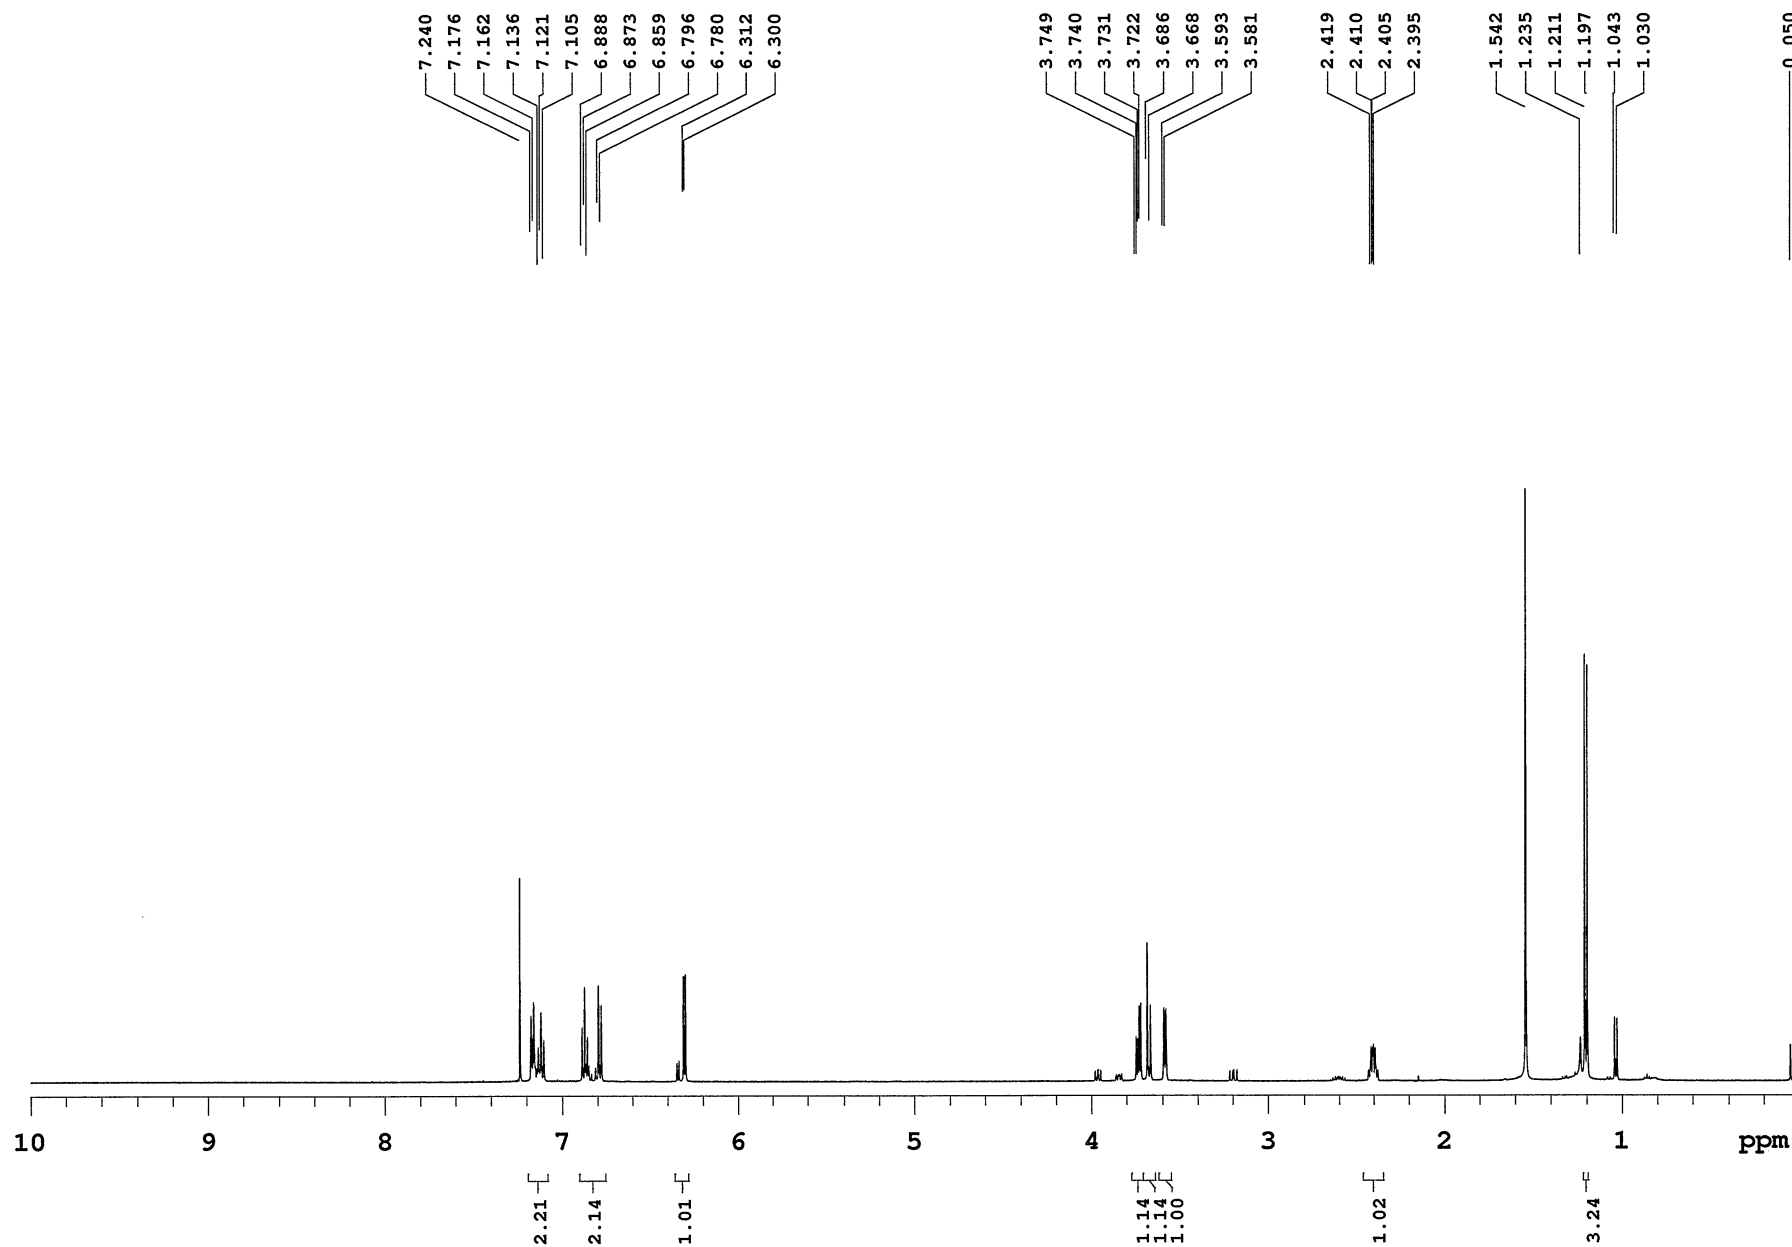

Sample Name **YYH-106**  
Date collected **2021-08-03**

Pulse sequence **CARBON**  
Solvent **cdcl3**

Temperature **25**  
Spectrometer **Agilent-NMR-inova500**

Study owner **vnmr2**  
Operator **vnmr2**

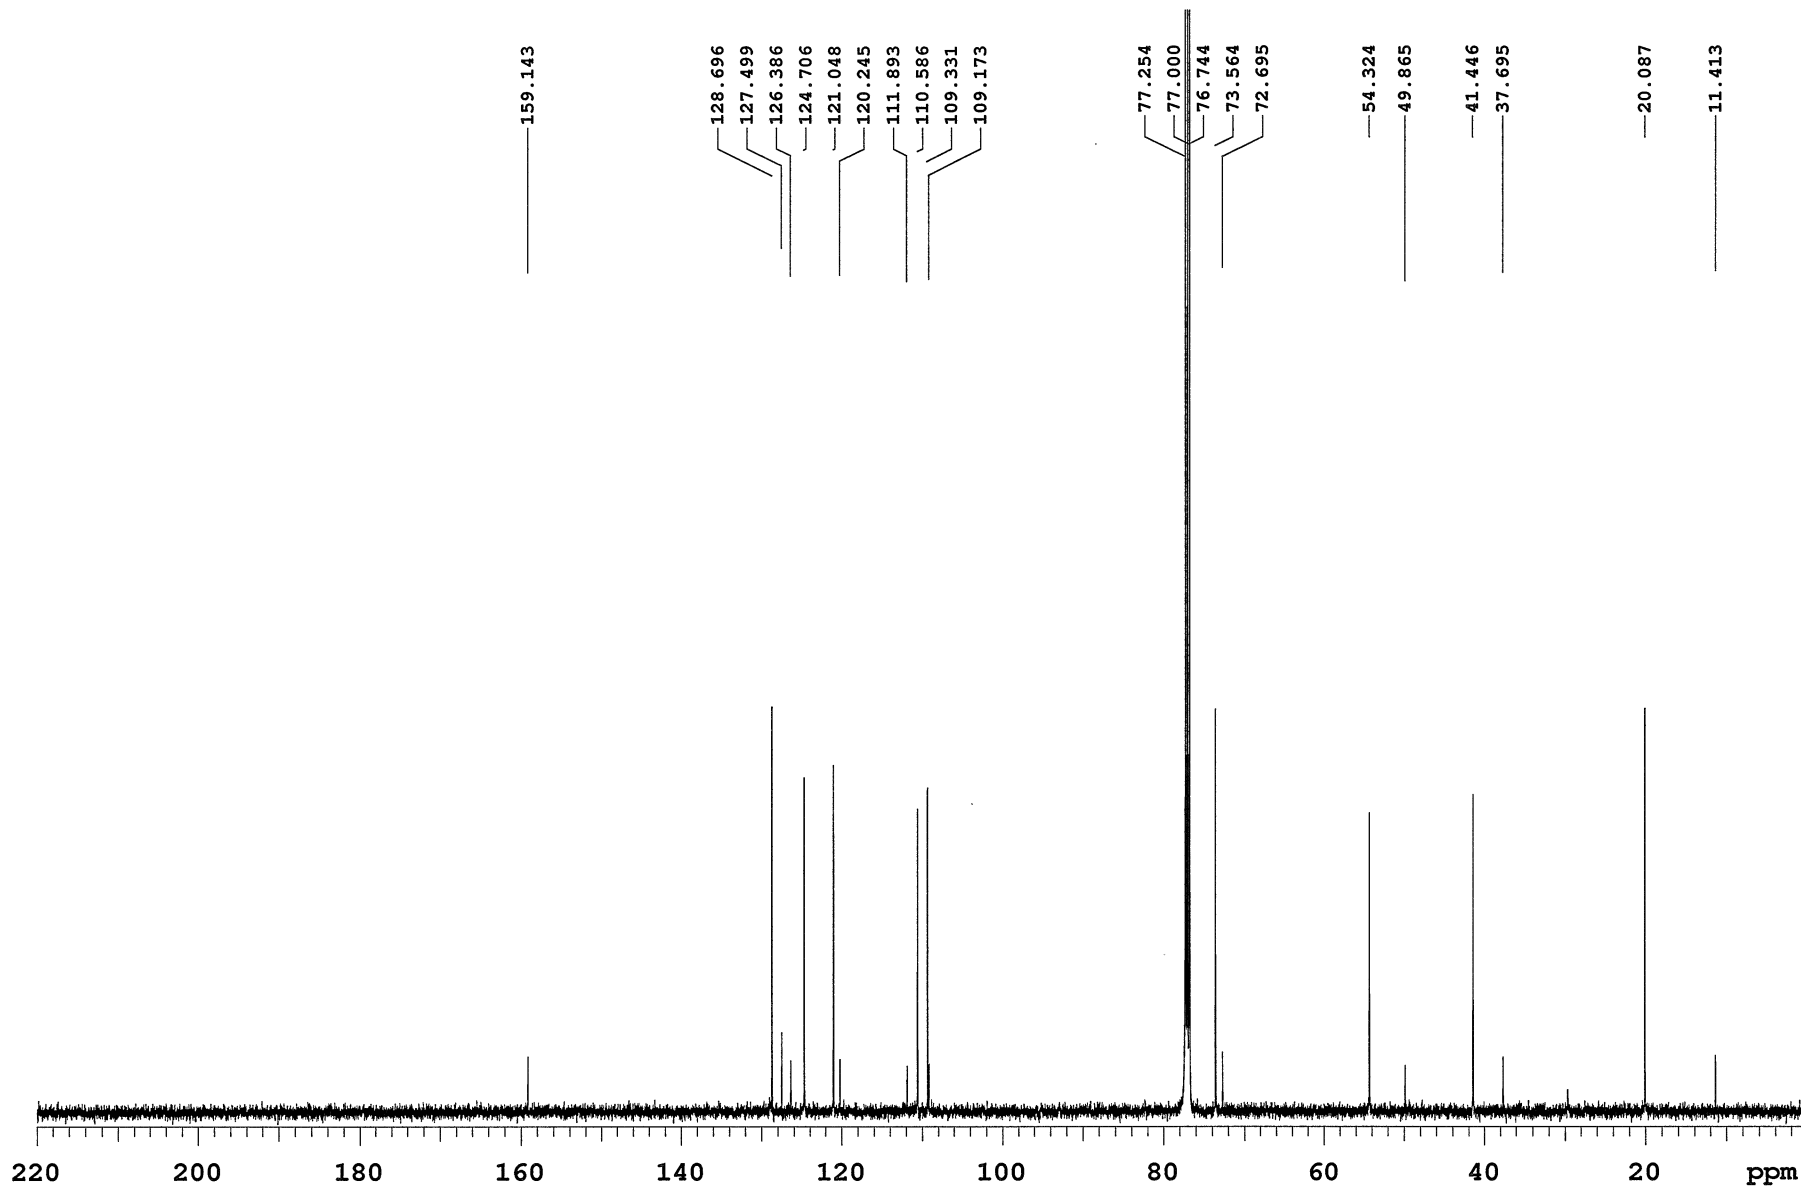

13C NMR (CDCl<sub>3</sub>, 125 MHz) of compound **4t**, with dr

Sample Name **YYH-106**  
Date collected **2021-08-03**

Pulse sequence **DEPT**  
Solvent **cdcl3**

Temperature **25**  
Spectrometer **Agilent-NMR-inova500**

Study owner **vnmr2**  
Operator **vnmr2**

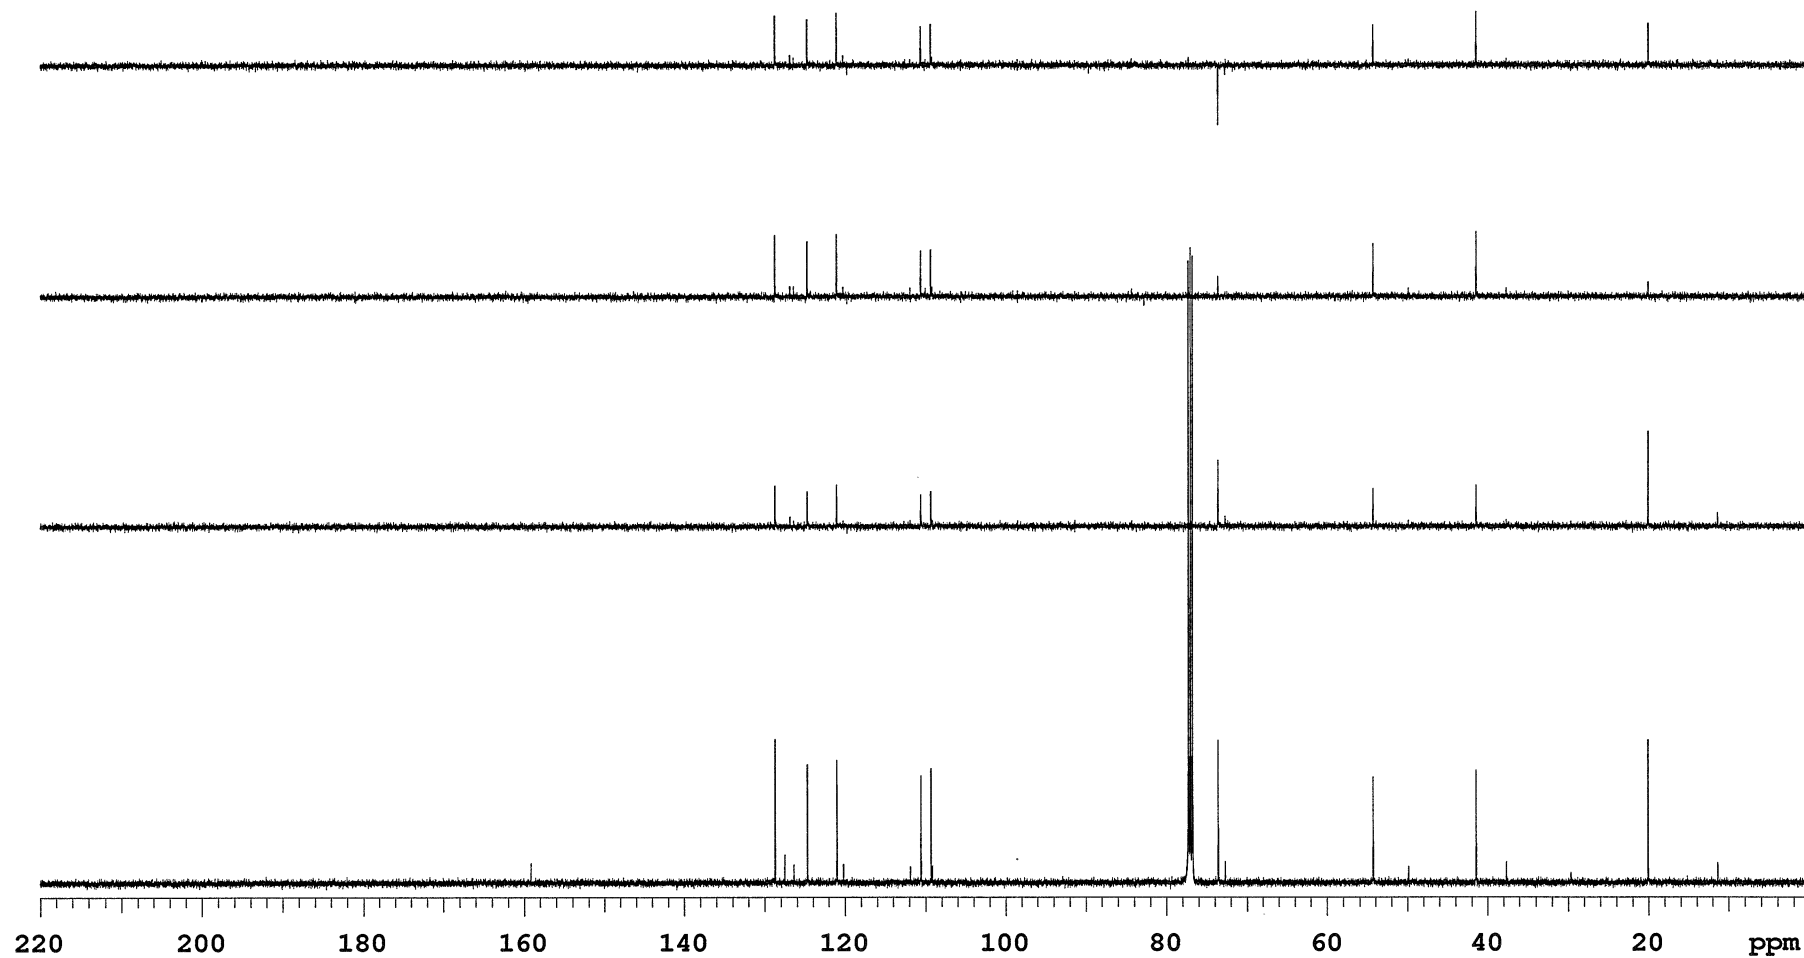

DEPT of compound **4t**, with dr

1H NMR (CDCl3, 400 MHz) of compound 5a

S171

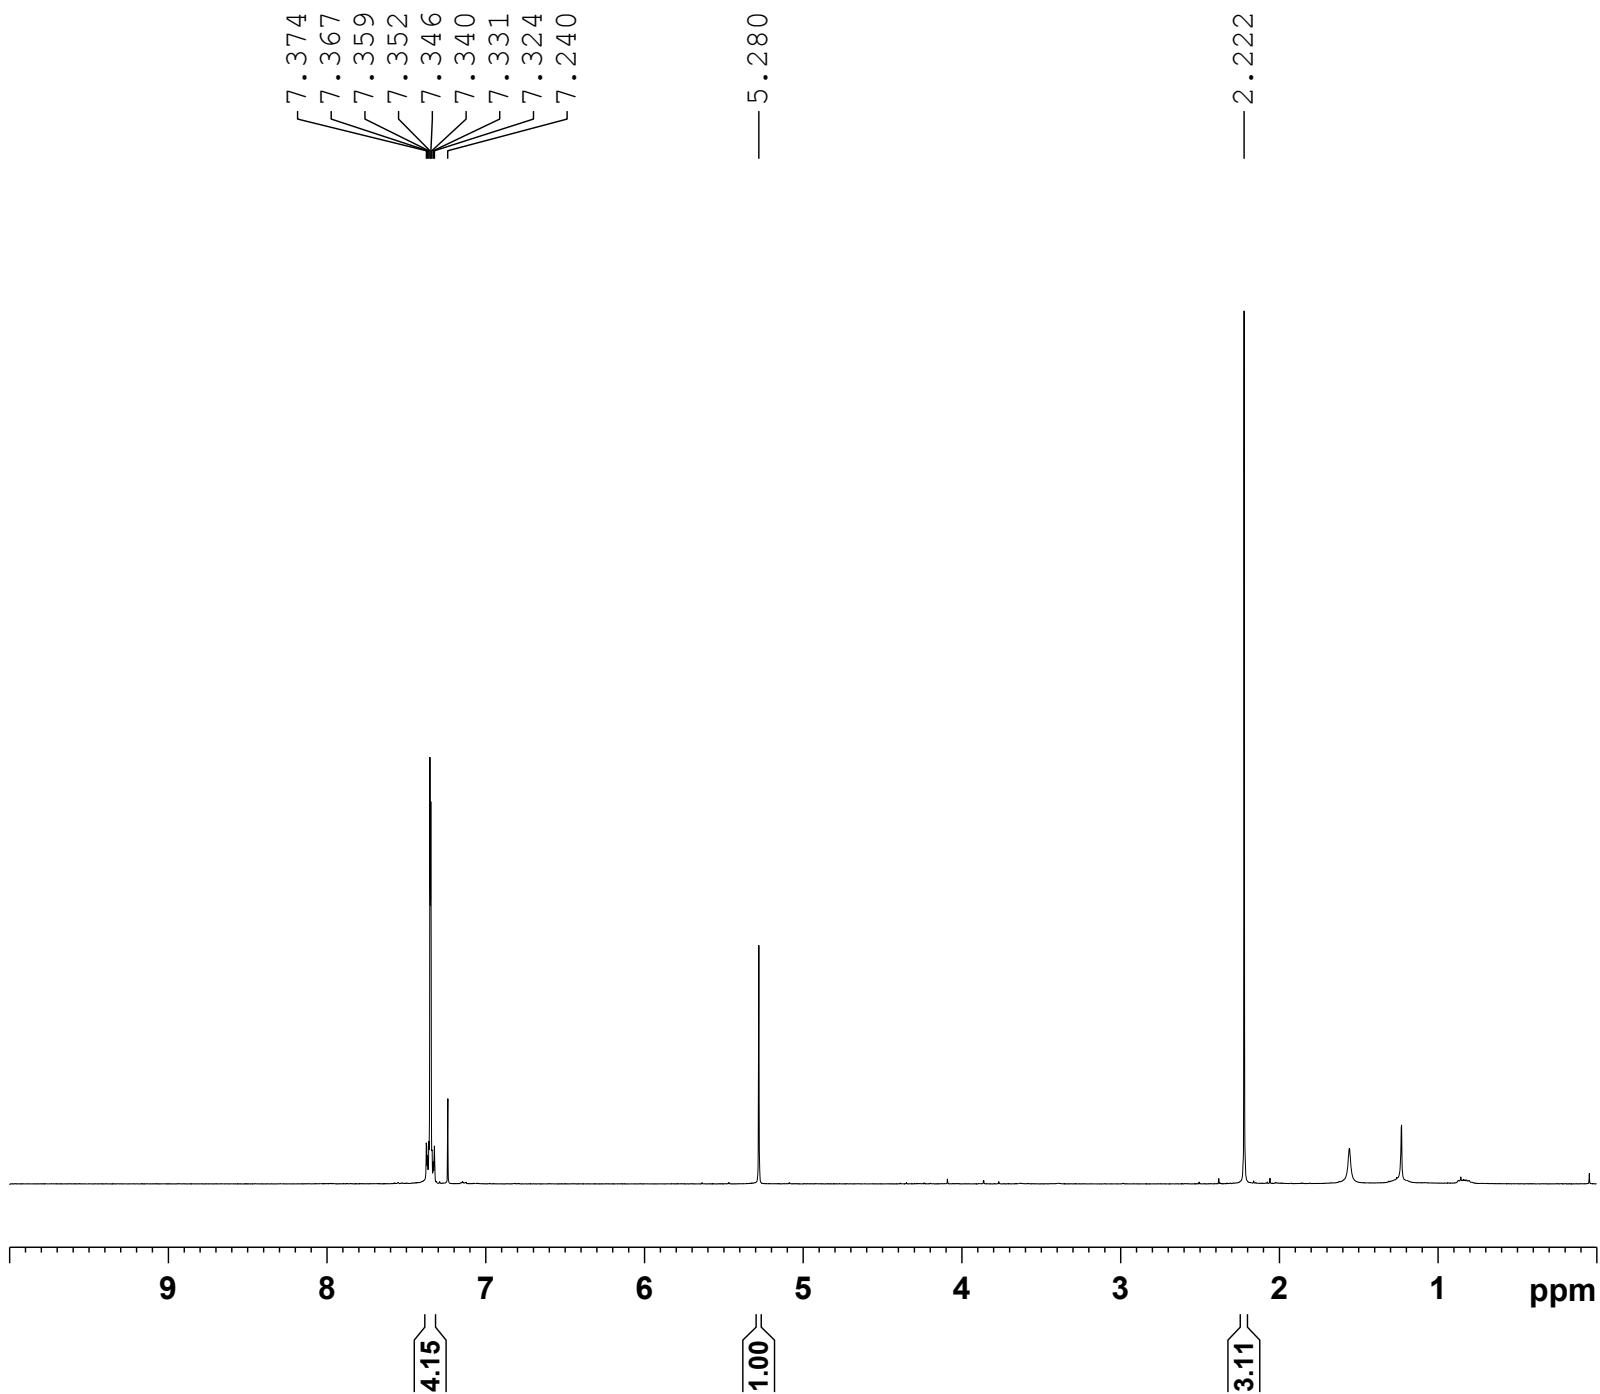

Current Data Parameters  
 NAME YYH-3-464-f1  
 EXPNO 1  
 PROCNO 1

F2 - Acquisition Parameters  
 Date\_ 20211028  
 Time\_ 21.58 h  
 INSTRUM spect  
 PROBHD Z108618\_0922 (  
 PULPROG zg30  
 TD 32768  
 SOLVENT CDCl3  
 NS 16  
 DS 0  
 SWH 8012.820 Hz  
 FIDRES 0.489064 Hz  
 AQ 2.0447233 sec  
 RG 210.28  
 DW 62.400 usec  
 DE 16.43 usec  
 TE 296.2 K  
 D1 2.00000000 sec  
 TD0 1  
 SFO1 400.1324008 MHz  
 NUC1 1H  
 P1 14.50 usec  
 PLW1 13.10000038 W

F2 - Processing parameters  
 SI 16384  
 SF 400.1300174 MHz  
 WDW EM  
 SSB 0  
 LB 0 Hz  
 GB 0  
 PC 1.00

13C NMR (CDCl3, 100 MHz) of compound **5a**

**S172**

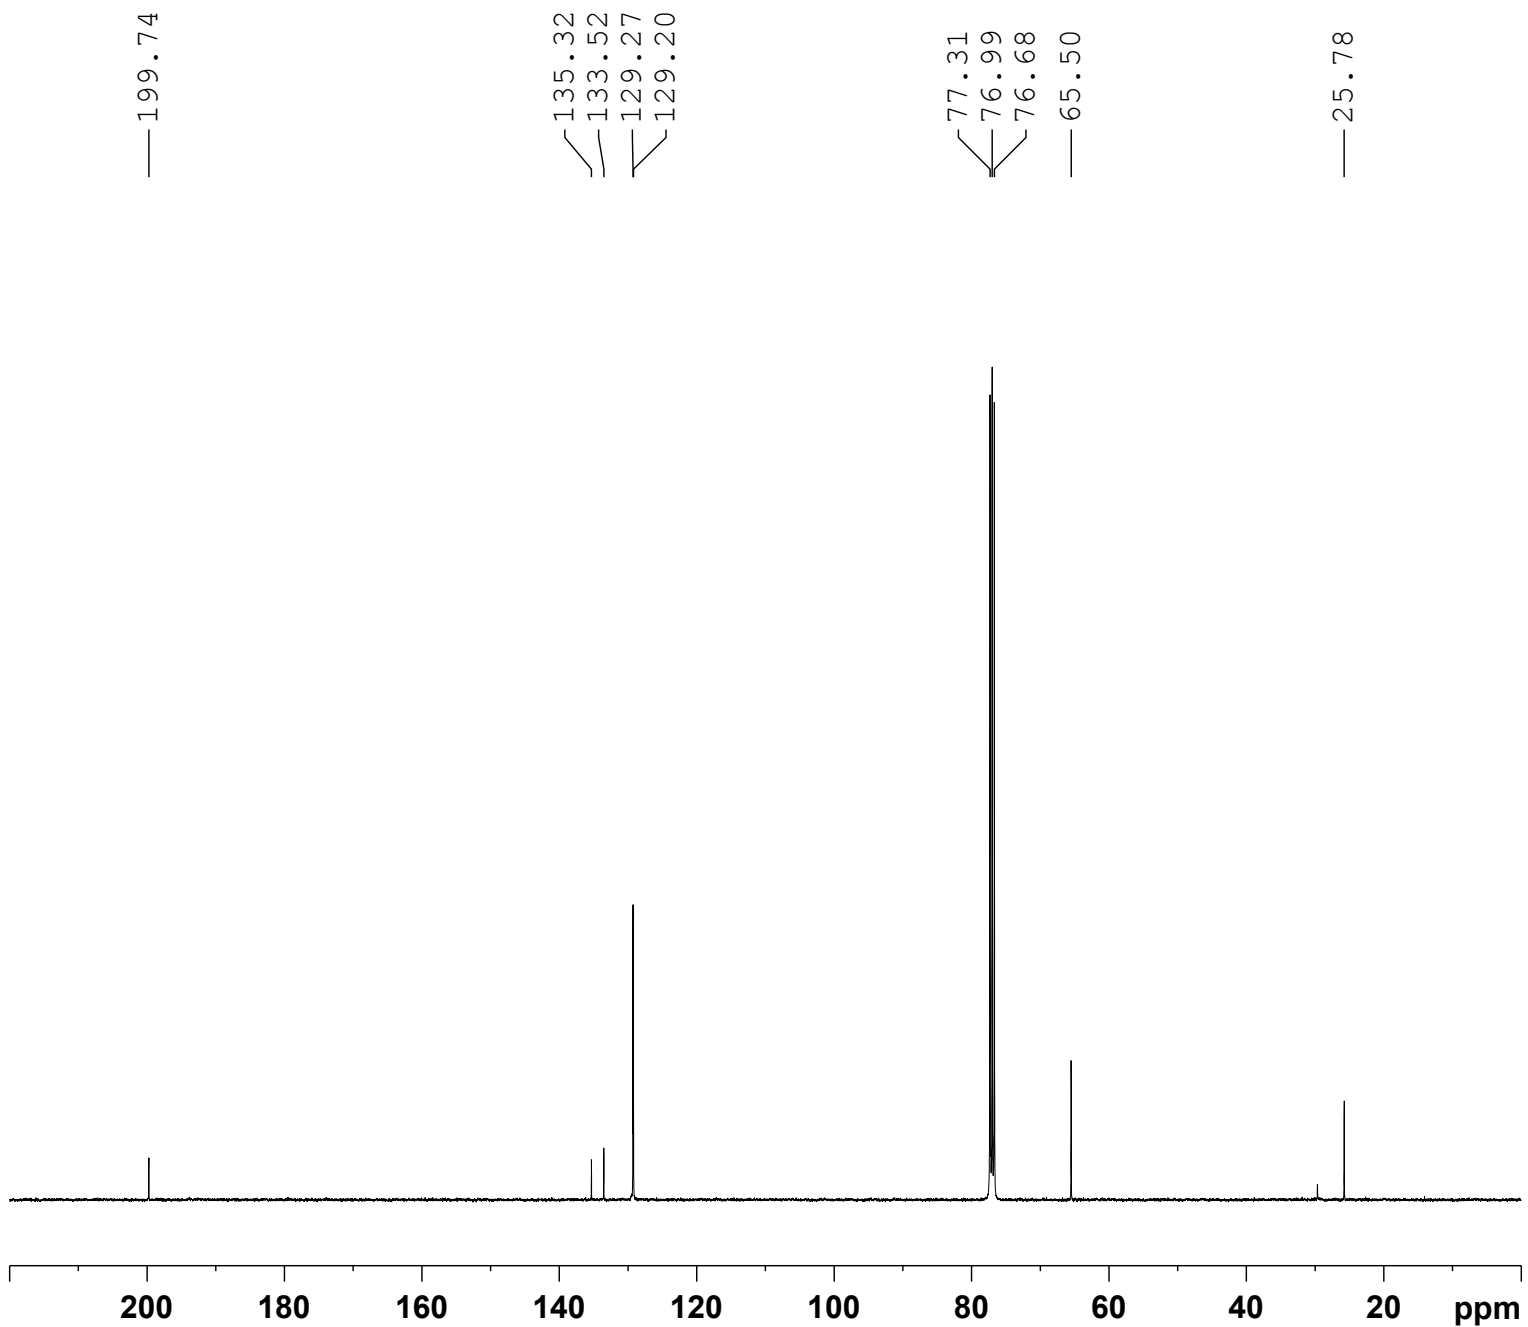

Current Data Parameters  
 NAME YYH-3-464-f1  
 EXPNO 2  
 PROCNO 1

F2 - Acquisition Parameters  
 Date\_ 20211029  
 Time\_ 2.34 h  
 INSTRUM spect  
 PROBHD z108618\_0922 (  
 PULPROG zgpg30  
 TD 32768  
 SOLVENT CDCl3  
 NS 6000  
 DS 0  
 SWH 24038.461 Hz  
 FIDRES 1.467191 Hz  
 AQ 0.6815744 sec  
 RG 210.28  
 DW 20.800 usec  
 DE 6.50 usec  
 TE 297.9 K  
 D1 2.00000000 sec  
 D11 0.03000000 sec  
 TD0 1  
 SFO1 100.6233329 MHz  
 NUC1 13C  
 P1 10.50 usec  
 PLW1 44.29999924 W  
 SFO2 400.1316005 MHz  
 NUC2 1H  
 CPDPRG[2 bi\_waltz65 256  
 PCPD2 90.00 usec  
 PLW2 14.60000038 W  
 PLW12 0.37897000 W  
 PLW13 0.19032000 W

F2 - Processing parameters  
 SI 32768  
 SF 100.6127713 MHz  
 WDW EM  
 SSB 0  
 LB 2.00 Hz  
 GB 0  
 PC 1.00



## DEPT of compound 5a

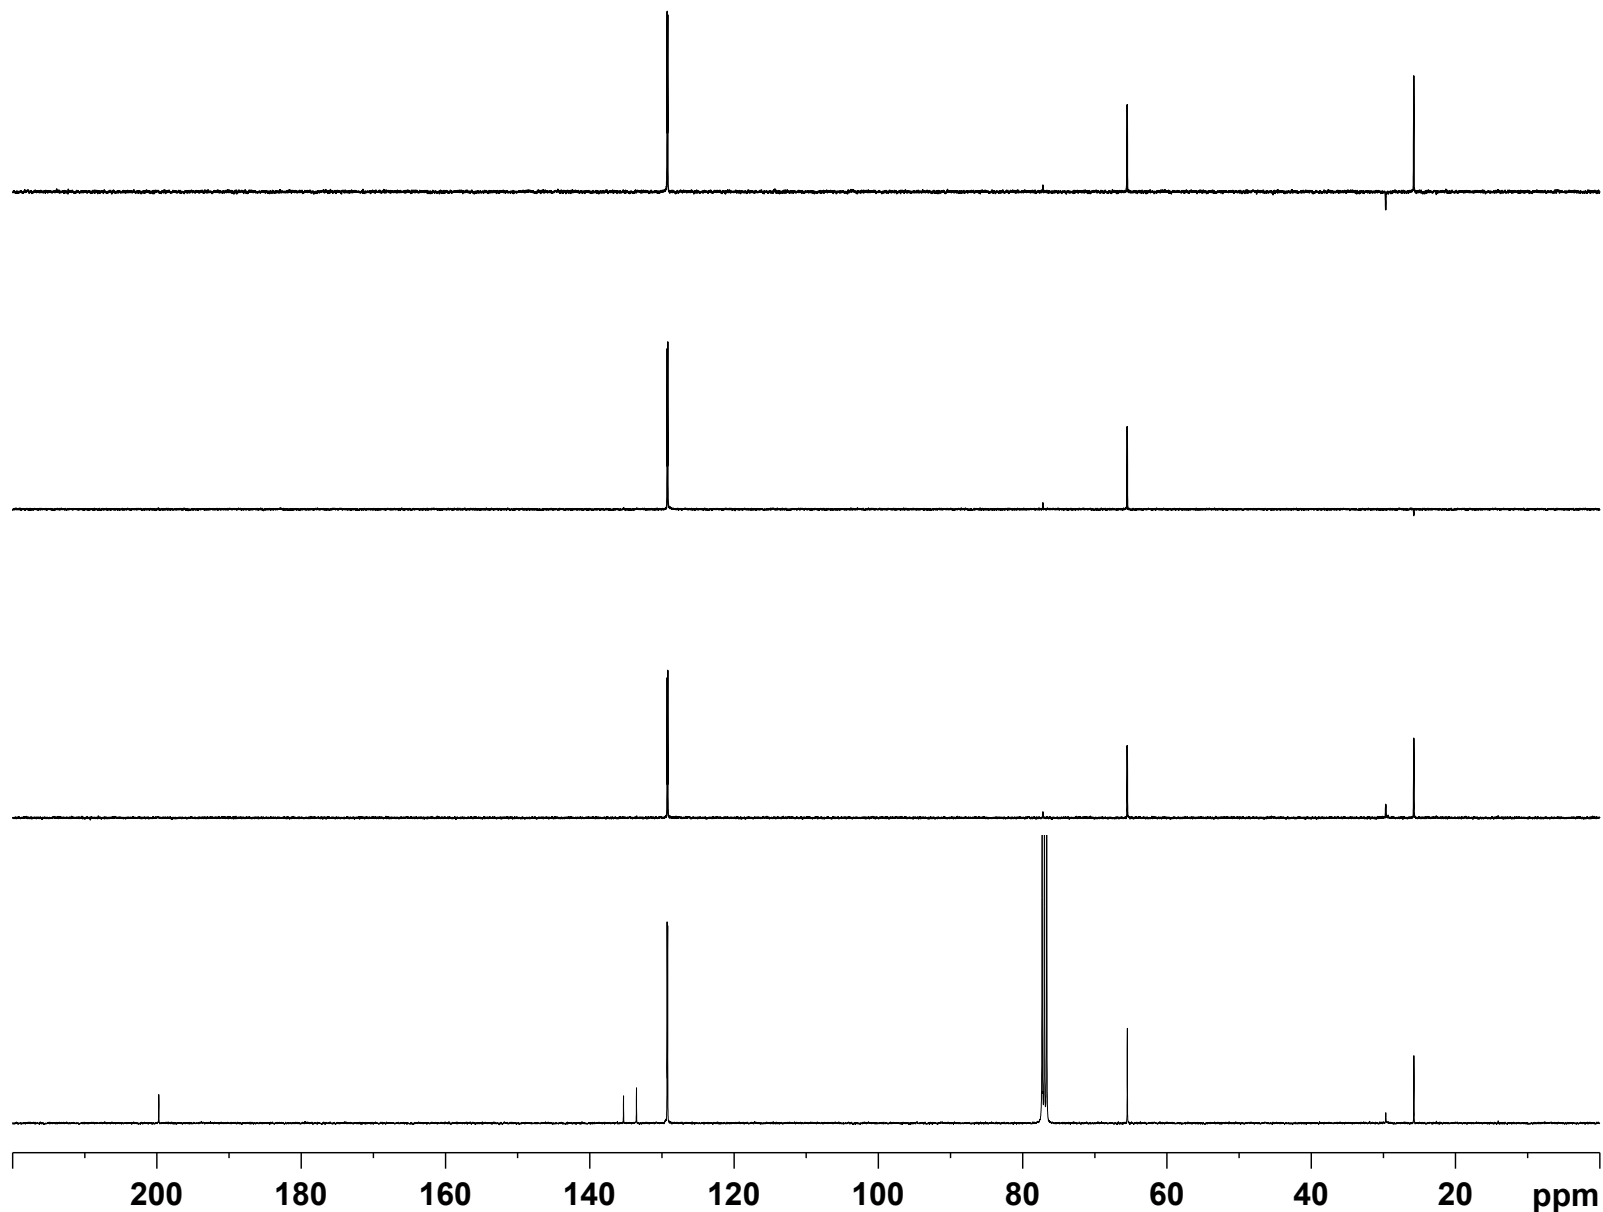

Current Data Parameters  
 NAME YYH-3-464-f1  
 EXPNO 2  
 PROCNO 1

F2 - Acquisition Parameters  
 Date\_ 20211029  
 Time 2.34 h  
 INSTRUM spect  
 PROBHD Z108618\_0922 (  
 PULPROG zgpg30  
 TD 32768  
 SOLVENT CDC13  
 NS 6000  
 DS 0  
 SWH 24038.461 Hz  
 FIDRES 1.467191 Hz  
 AQ 0.6815744 sec  
 RG 210.28  
 DW 20.800 usec  
 DE 6.50 usec  
 TE 297.9 K  
 D1 2.00000000 sec  
 D11 0.03000000 sec  
 TD0 1  
 SFO1 100.6233329 MHz  
 NUC1 13C  
 P1 10.50 usec  
 PLW1 44.29999924 W  
 SFO2 400.1316005 MHz  
 NUC2 1H  
 CPDPRG[2 bi\_waltz65\_256  
 PCPD2 90.00 usec  
 PLW2 14.60000038 W  
 PLW12 0.37897000 W  
 PLW13 0.19032000 W

F2 - Processing parameters  
 SI 32768  
 SF 100.6127713 MHz  
 WDW EM  
 SSB 0  
 LB 2.00 Hz  
 GB 0  
 PC 1.00

1H NMR (CDCl3, 400 MHz) of compound **6h**

**S174**

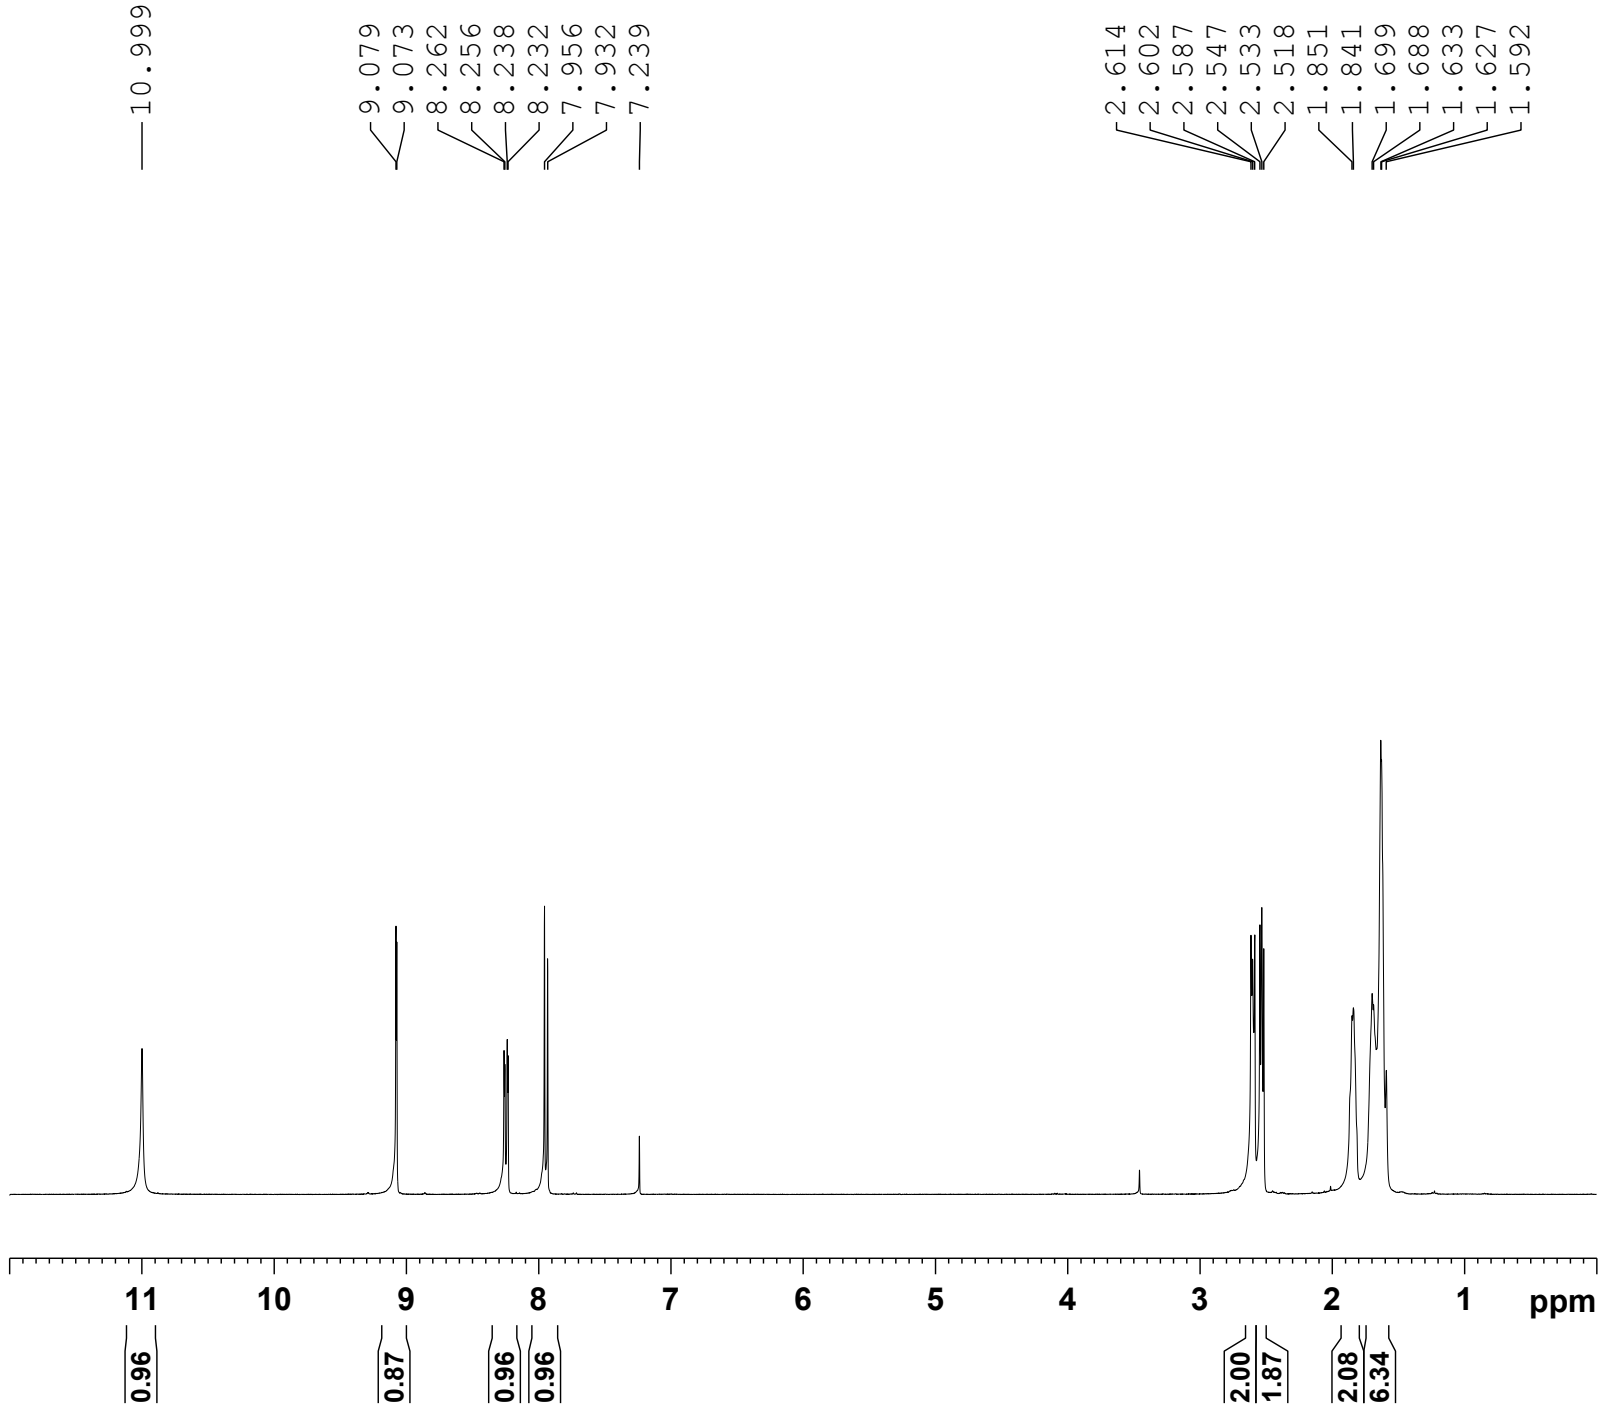

Current Data Parameters  
 NAME YYH-114  
 EXPNO 1  
 PROCNO 1

F2 - Acquisition Parameters  
 Date\_ 20210910  
 Time\_ 13.32 h  
 INSTRUM spect  
 PROBHD z108618\_0922 (  
 PULPROG zg30  
 TD 32768  
 SOLVENT CDCl3  
 NS 16  
 DS 0  
 SWH 8012.820 Hz  
 FIDRES 0.489064 Hz  
 AQ 2.0447233 sec  
 RG 103.85  
 DW 62.400 usec  
 DE 16.43 usec  
 TE 298.5 K  
 D1 2.00000000 sec  
 TD0 1  
 SFO1 400.1324008 MHz  
 NUC1 1H  
 P1 14.50 usec  
 PLW1 13.10000038 W

F2 - Processing parameters  
 SI 16384  
 SF 400.1300174 MHz  
 WDW EM  
 SSB 0  
 LB 0 Hz  
 GB 0  
 PC 1.00

13C NMR (CDCl3, 100 MHz) of compound 6h

S175

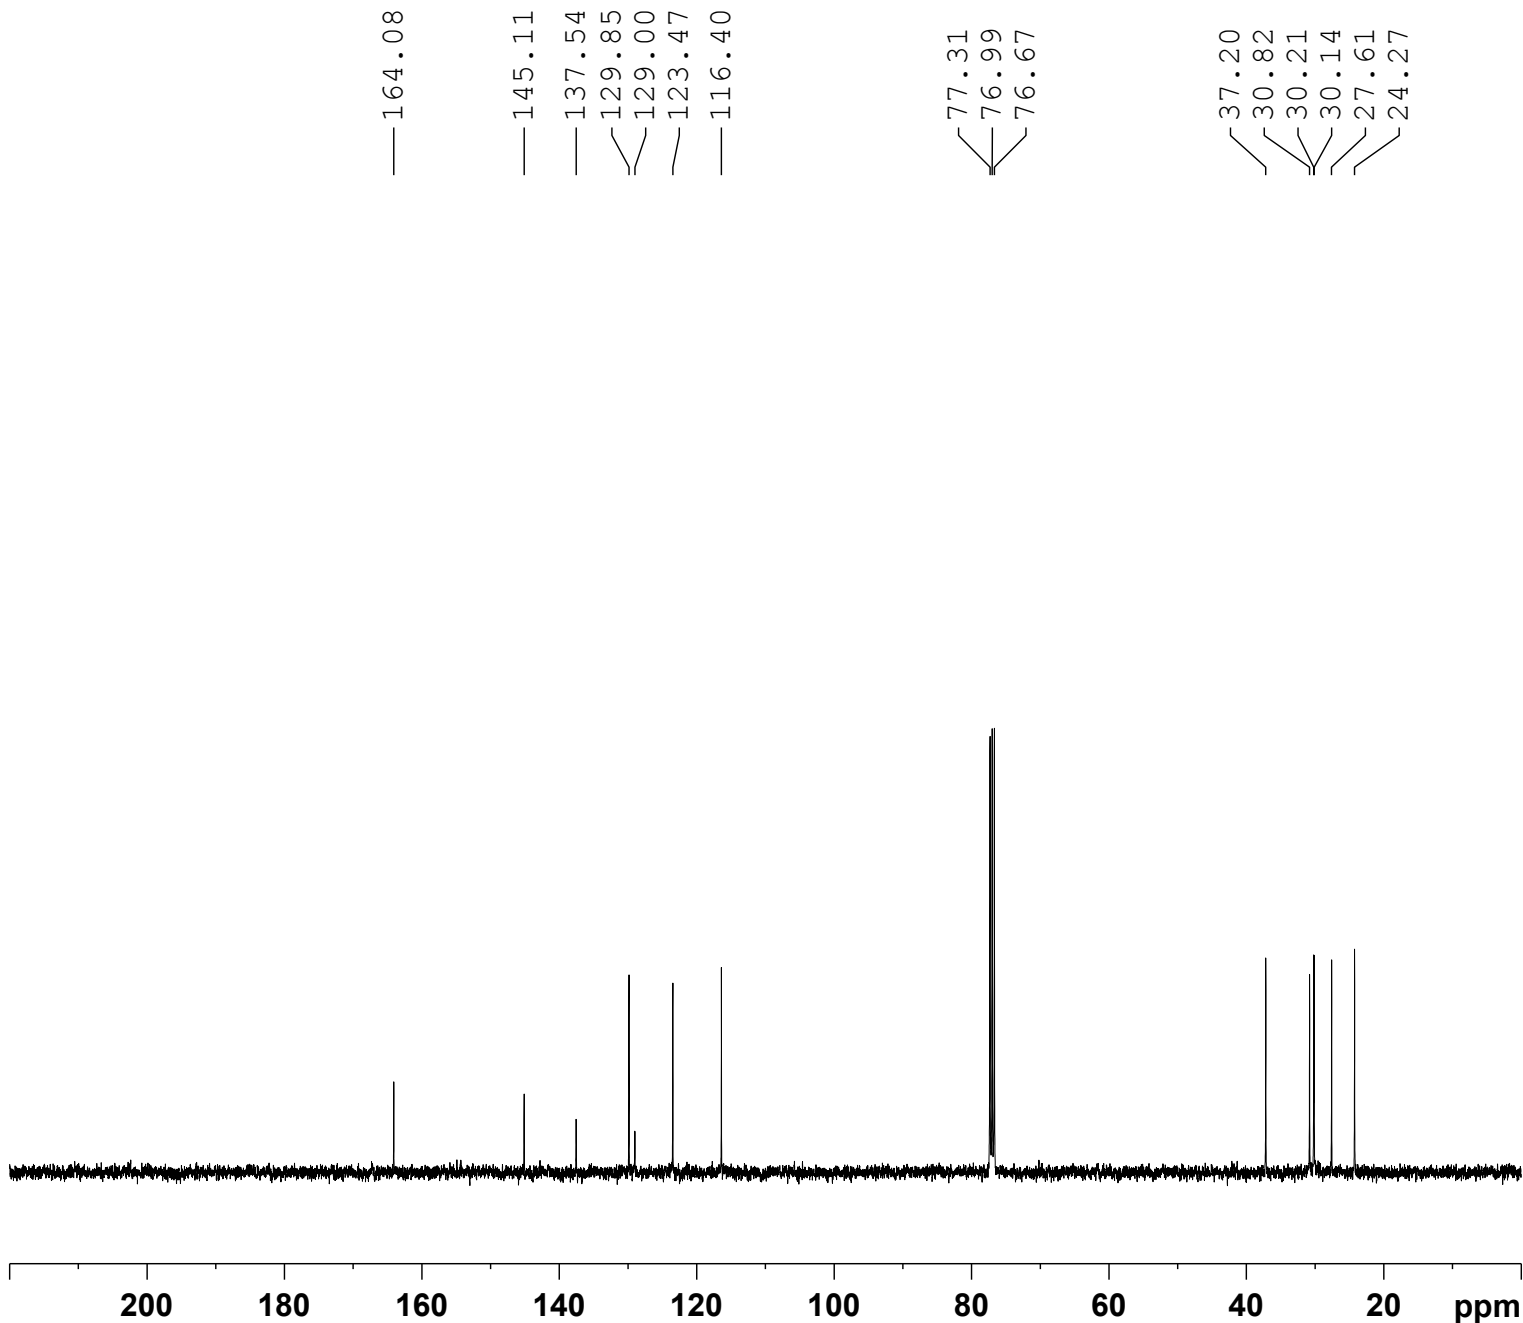

Current Data Parameters  
 NAME YYH-114  
 EXPNO 2  
 PROCNO 1

F2 - Acquisition Parameters  
 Date\_ 20210910  
 Time\_ 13.39 h  
 INSTRUM spect  
 PROBHD z108618\_0922 (  
 PULPROG zgpg30  
 TD 32768  
 SOLVENT CDCl3  
 NS 135  
 DS 0  
 SWH 24038.461 Hz  
 FIDRES 1.467191 Hz  
 AQ 0.6815744 sec  
 RG 210.28  
 DW 20.800 usec  
 DE 6.50 usec  
 TE 299.2 K  
 D1 2.00000000 sec  
 D11 0.03000000 sec  
 TD0 1  
 SFO1 100.6233329 MHz  
 NUC1 13C  
 P1 10.50 usec  
 PLW1 44.29999924 W  
 SFO2 400.1316005 MHz  
 NUC2 1H  
 CPDPRG[2 bi\_waltz65 256  
 PCPD2 90.00 usec  
 PLW2 14.60000038 W  
 PLW12 0.37897000 W  
 PLW13 0.19032000 W

F2 - Processing parameters  
 SI 32768  
 SF 100.6127742 MHz  
 WDW EM  
 SSB 0  
 LB 2.00 Hz  
 GB 0  
 PC 1.00

DEPT of compound 6h

S176

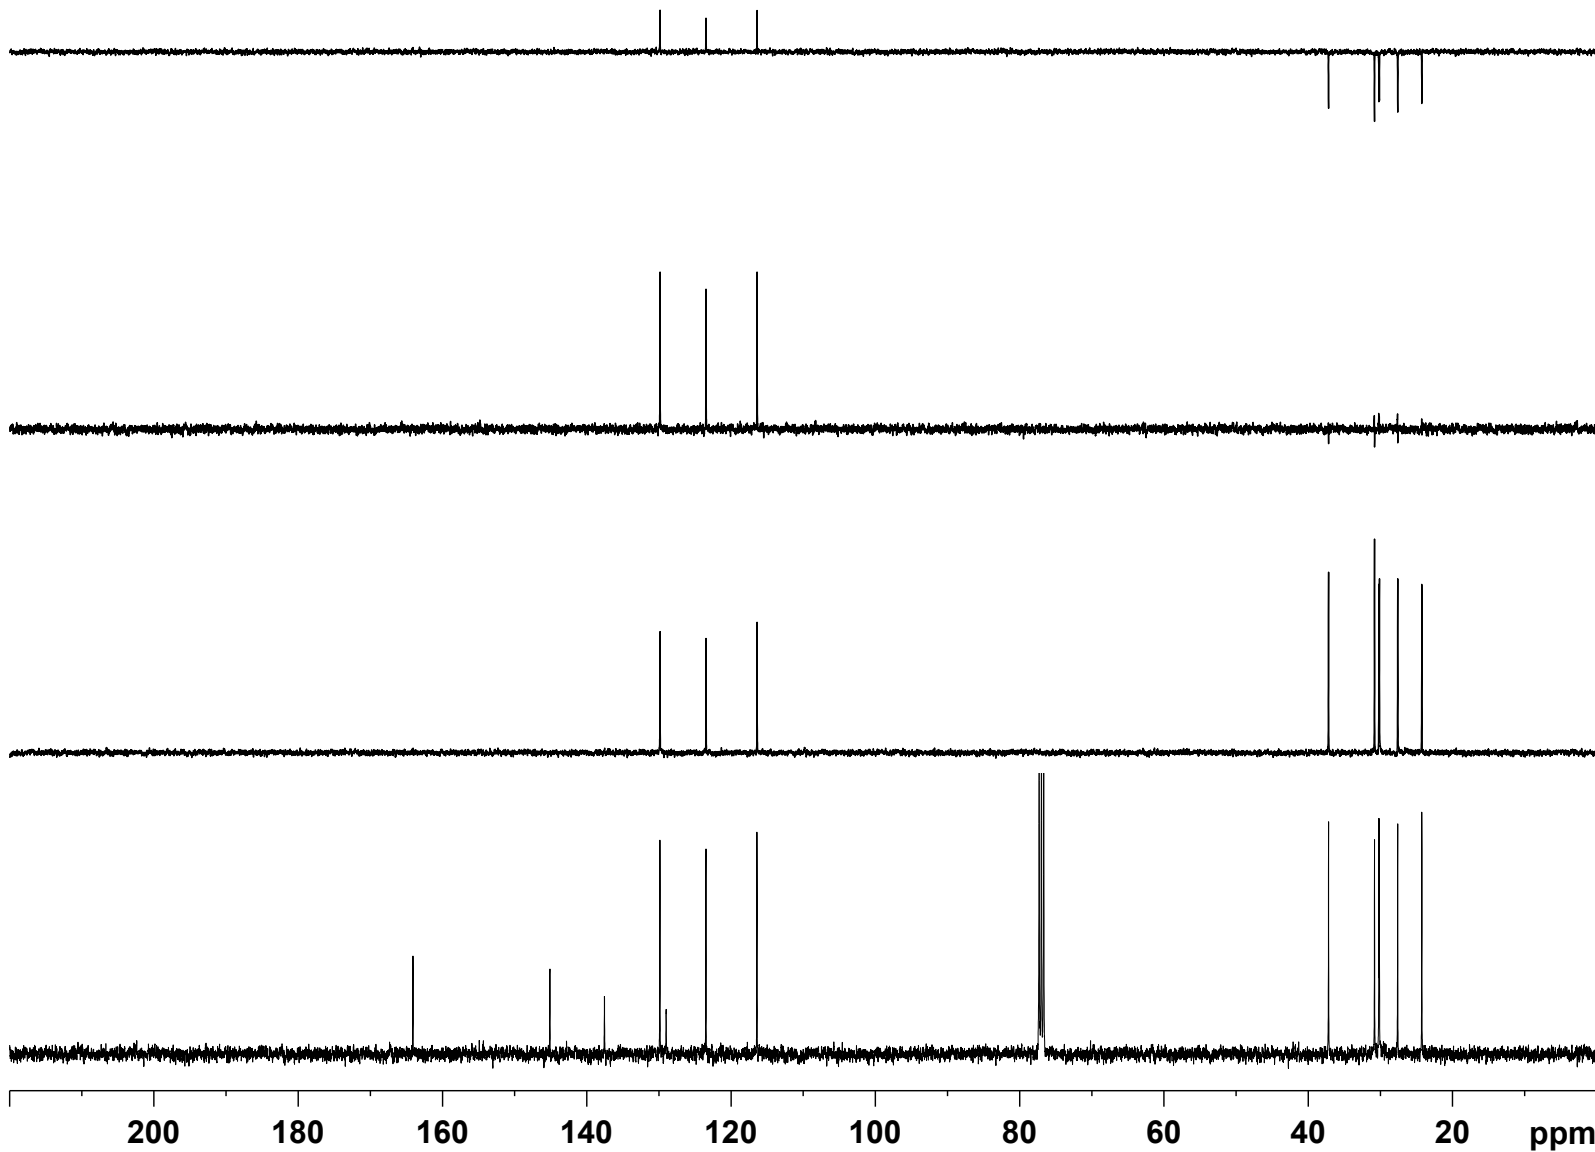

Current Data Parameters  
 NAME YYH-114  
 EXPNO 2  
 PROCNO 1

F2 - Acquisition Parameters  
 Date\_ 20210910  
 Time 13.39 h  
 INSTRUM spect  
 PROBHD z108618\_0922 (  
 PULPROG zgpg30  
 TD 32768  
 SOLVENT CDC13  
 NS 135  
 DS 0  
 SWH 24038.461 Hz  
 FIDRES 1.467191 Hz  
 AQ 0.6815744 sec  
 RG 210.28  
 DW 20.800 usec  
 DE 6.50 usec  
 TE 299.2 K  
 D1 2.00000000 sec  
 D11 0.03000000 sec  
 TD0 1  
 SFO1 100.6233329 MHz  
 NUC1 13C  
 P1 10.50 usec  
 PLW1 44.29999924 W  
 SFO2 400.1316005 MHz  
 NUC2 1H  
 CPDPRG[2 bi\_waltz65\_256  
 PCPD2 90.00 usec  
 PLW2 14.60000038 W  
 PLW12 0.37897000 W  
 PLW13 0.19032000 W

F2 - Processing parameters  
 SI 32768  
 SF 100.6127742 MHz  
 WDW EM  
 SSB 0  
 LB 2.00 Hz  
 GB 0  
 PC 1.00
